# Supplementary material for: Integrating Multi-Omics Analysis for Enhanced Diagnosis and Treatment of Glioblastoma: A Comprehensive Data-Driven Approach
Source: Preprints.org preprint supplement (doi:10.20944/preprints202303.0355.v1), 2023-03-20
Supplement: Supplementary file 1 [file supplementary]

## Sheet: Sheet1
Shared name	name	gene name	query term	Ensemble Gene ID	Ensemble Protein ID	Enterz Gene ID	RefSeq Protein ID	Synonyme	Uniprot ID	log score	score	annotation	annotation name		Eccentricity	Closeness	Betweenness	Degree	Centroid
H__sapiens__1_-772780	H__sapiens__1_-772780	CFLAR	CFLAR	O15519	ENSP00000471805	8837	NP_003870	NM_003879	MRIT	-0.12082578730308716	0.886188331404907	["GO:0043281","GO:0051146","GO:0042692","GO:0014706","GO:0010950","GO:2001234","GO:0042246","GO:2001236","GO:2001233","GO:0008625","GO:0070265","GO:2001237","GO:0043122","GO:0060142","GO:0097153","GO:0014888","GO:0070266","GO:0014902","GO:0045862","GO:0033002","GO:0140253","GO:0060538","GO:0010952","GO:0051091","GO:0048589","GO:0062098","GO:0000768","GO:1901739","GO:0097300","GO:0097191","GO:0031…	["regulation of cysteine-type endopeptidase activity involved in apoptotic process","striated muscle cell differentiation","muscle cell differentiation","striated muscle tissue development","positive regulation of endopeptidase activity","negative regulation of apoptotic signaling pathway","tissue regeneration","regulation of extrinsic apoptotic signaling pathway","regulation of apoptotic signali…	query	0.3333333333333333	1.5044380923724988E-4	1488.3194718411332	1273.0	-3874.0
H__sapiens__1_-775415	H__sapiens__1_-775415	GLA	GLA	P06280	ENSP00000502805	2717	NP_000160	NM_000169	GALA	-0.17183414750270246	0.8421188290978646	["GO:0044242","GO:0006643","GO:0046209","GO:2000377","GO:0005766","GO:0046479","GO:0050999","GO:0045428","GO:0030149","GO:0016042","GO:0072593","GO:0019377","GO:0006809","GO:0016798","GO:0034774","GO:0046466","GO:1901136","GO:0006665","GO:2000378","GO:1903409","GO:1903426","GO:0016137","GO:0042582","GO:0051354","GO:0032768","GO:0046514","GO:2001057","GO:0051341","GO:0005775","GO:1903427","GO:0004…	["cellular lipid catabolic process","membrane lipid metabolic process","nitric oxide metabolic process","regulation of reactive oxygen species metabolic process","primary lysosome","glycosphingolipid catabolic process","regulation of nitric-oxide synthase activity","regulation of nitric oxide biosynthetic process","sphingolipid catabolic process","lipid catabolic process","reactive oxygen species…	query	0.3333333333333333	1.6342539630658605E-4	4735.856585861055	1759.0	-3874.0
H__sapiens__1_-773169	H__sapiens__1_-773169	BIRC3	BIRC3	Q13489	ENSP00000501181	330	NP_892007	NM_182962	RNF49	-0.26638314811618946	0.7661455240435409	["GO:0043281","GO:0061135","GO:0034612","GO:0061134","GO:0031396","GO:0060547","GO:0016485","GO:1903320","GO:0070265","GO:0051346","GO:0043122","GO:0004866","GO:0071356","GO:0043028","GO:0061659","GO:0070266","GO:0009615","GO:0030414","GO:0004857","GO:2000117","GO:0002224","GO:0043154","GO:0002753","GO:0062098","GO:0051604","GO:0097300","GO:1903317","GO:0010466","GO:2000116","GO:1903322","GO:0060…	["regulation of cysteine-type endopeptidase activity involved in apoptotic process","endopeptidase regulator activity","response to tumor necrosis factor","peptidase regulator activity","regulation of protein ubiquitination","negative regulation of necrotic cell death","protein processing","regulation of protein modification by small protein conjugation or removal","necrotic cell death","negative…	query	0.3333333333333333	1.6761649346295676E-4	5410.533398502173	2283.0	-3874.0
H__sapiens__1_-787403	H__sapiens__1_-787403	CDH4	CDH4	P55283	ENSP00000487355	1002	NP_001785	NM_001794		-0.1380378582731311	0.8710657140778448	["GO:0019898","GO:0098742","GO:0045216","GO:0019897"]	["extrinsic component of membrane","cell-cell adhesion via plasma-membrane adhesion molecules","cell-cell junction organization","extrinsic component of plasma membrane"]	query	0.3333333333333333	1.5391719255040788E-4	2239.570313939101	1469.0	-3874.0
H__sapiens__1_-789008	H__sapiens__1_-789008	GNG2	GNG2	P59768	ENSP00000484021	54331	NP_444292	NM_053064		-0.07184295812904605	0.930677039599111	["GO:0009898","GO:0034694","GO:0071868","GO:0097306","GO:0007188","GO:0019898","GO:1903350","GO:1903351","GO:0098562","GO:0031234","GO:0007187","GO:0070542","GO:0007596","GO:0050817","GO:0071870","GO:1905360","GO:0019897","GO:0071867","GO:0071379","GO:0007189","GO:0071869","GO:0007212","GO:0019933","GO:0071398","GO:1901654","GO:0019935","GO:0035567","GO:0097305","GO:0007599","GO:1901655"]	["cytoplasmic side of plasma membrane","response to prostaglandin","cellular response to monoamine stimulus","cellular response to alcohol","adenylate cyclase-modulating G protein-coupled receptor signaling pathway","extrinsic component of membrane","response to dopamine","cellular response to dopamine","cytoplasmic side of membrane","extrinsic component of cytoplasmic side of plasma membrane","G…	query	0.3333333333333333	1.4858841010401187E-4	1416.3516552747228	1358.0	-3874.0
H__sapiens__1_-787420	H__sapiens__1_-787420	HLA-DQB1	HLA-DQB1	P01920	ENSP00000436686	3119	NP_002114	NM_002123	HLA-DQB	-0.10256146331996684	0.90252267600813	["GO:0030176","GO:0006959","GO:0030662","GO:0019882","GO:0005802","GO:0034341","GO:0042611","GO:0030139","GO:0030666","GO:0030135","GO:0002495","GO:0019724","GO:0002449","GO:0098553","GO:0030136","GO:0002250","GO:0098576","GO:0016064","GO:0042277","GO:0002377","GO:0030665","GO:0003823","GO:0030134","GO:0030133","GO:0002440","GO:0005798","GO:0030658","GO:0048002","GO:0071346","GO:0005789","GO:0002…	["integral component of endoplasmic reticulum membrane","humoral immune response","coated vesicle membrane","antigen processing and presentation","trans-Golgi network","response to interferon-gamma","MHC protein complex","endocytic vesicle","endocytic vesicle membrane","coated vesicle","antigen processing and presentation of peptide antigen via MHC class II","B cell mediated immunity","lymphocyte…	query	0.3333333333333333	1.4320492624946297E-4	627.8370992540945	832.0	-3874.0
H__sapiens__1_-780031	H__sapiens__1_-780031	GH2	GH2	P01242	ENSP00000481086	2689	NP_072052	NM_022558	hGH-V	-0.0979933142175566	0.9066549654315075	["GO:0097696","GO:1901653","GO:0018108","GO:0046425","GO:1904892","GO:0007260","GO:0071375","GO:0043434","GO:0050730","GO:0051427","GO:0050731","GO:0018212","GO:0009991","GO:1904894","GO:0042509","GO:0007259","GO:0005126","GO:0071378","GO:0060396","GO:0060416"]	["receptor signaling pathway via STAT","cellular response to peptide","peptidyl-tyrosine phosphorylation","regulation of receptor signaling pathway via JAK-STAT","regulation of receptor signaling pathway via STAT","tyrosine phosphorylation of STAT protein","cellular response to peptide hormone stimulus","response to peptide hormone","regulation of peptidyl-tyrosine phosphorylation","hormone recep…	query	0.3333333333333333	1.424298532972511E-4	612.7531812789879	815.0	-3874.0
H__sapiens__1_-780111	H__sapiens__1_-780111	BAAT	BAAT	Q14032	ENSP00000502812	570	NP_001692	NM_001701	BAT	-0.17086269392270886	0.8429373059409335	["GO:0035383","GO:0031907","GO:1901617","GO:0005777","GO:0016747","GO:0072662","GO:0033865","GO:0016790","GO:0008206","GO:0008202","GO:0007031","GO:0016746","GO:0033875","GO:0042579","GO:0006694","GO:0016289","GO:0006520","GO:0034032","GO:0072330","GO:0043574","GO:0046394","GO:0072663","GO:0016053"]	["thioester metabolic process","microbody lumen","organic hydroxy compound biosynthetic process","peroxisome","transferase activity, transferring acyl groups other than amino-acyl groups","protein localization to peroxisome","nucleoside bisphosphate metabolic process","thiolester hydrolase activity","bile acid metabolic process","steroid metabolic process","peroxisome organization","transferase a…	query	0.3333333333333333	1.6636167027116953E-4	5142.069898856672	2032.0	-3874.0
H__sapiens__1_-782111	H__sapiens__1_-782111	CACNA2D4	CACNA2D4	Q7Z3S7	ENSP00000496774	93589	NP_758952	NM_172364		-0.04144675546993479	0.9594004168058932	["GO:0005244","GO:1903522","GO:0008016","GO:0009416","GO:0035637","GO:0060047","GO:1990351","GO:0005262","GO:0006816","GO:0072509","GO:0034704","GO:0015085","GO:0003015","GO:0022832","GO:1902495","GO:0022843"]	["voltage-gated ion channel activity","regulation of blood circulation","regulation of heart contraction","response to light stimulus","multicellular organismal signaling","heart contraction","transporter complex","calcium channel activity","calcium ion transport","divalent inorganic cation transmembrane transporter activity","calcium channel complex","calcium ion transmembrane transporter activi…	query	0.3333333333333333	1.4421690222094028E-4	959.9707923904606	889.0	-3874.0
H__sapiens__1_-795919	H__sapiens__1_-795919	PHB2	PHB2	Q99623	ENSP00000475382	11331	NP_001254629	NM_001267700	REA	-0.23673051178679458	0.789203940522437	["GO:0006959","GO:0051817","GO:0043406","GO:0140014","GO:0043405","GO:0043467","GO:0098800","GO:0070588","GO:0032412","GO:0061629","GO:0006956","GO:0046471","GO:0005743","GO:0000422","GO:0071902","GO:0019216","GO:0051701","GO:0060191","GO:0032147","GO:0035258","GO:0010518","GO:1903725","GO:0010863","GO:1902600","GO:0060193","GO:0009615","GO:0010517","GO:0022898","GO:0006816","GO:0032048","GO:0031…	["humoral immune response","modulation of process of other organism involved in symbiotic interaction","positive regulation of MAP kinase activity","mitotic nuclear division","regulation of MAP kinase activity","regulation of generation of precursor metabolites and energy","inner mitochondrial membrane protein complex","calcium ion transmembrane transport","regulation of ion transmembrane transpo…	query	0.3333333333333333	1.5936254980079682E-4	4033.323339716338	1647.0	-3874.0
H__sapiens__1_-786182	H__sapiens__1_-786182	HPSE2	HPSE2	Q8WWQ2	ENSP00000485916	60495	NP_068600	NM_021828	UFS	-0.1328427420049923	0.8756027768195824	["GO:0030203","GO:0043394","GO:0006022","GO:1901681","GO:0006026","GO:1901136","GO:0016798","GO:0004553"]	["glycosaminoglycan metabolic process","proteoglycan binding","aminoglycan metabolic process","sulfur compound binding","aminoglycan catabolic process","carbohydrate derivative catabolic process","hydrolase activity, acting on glycosyl bonds","hydrolase activity, hydrolyzing O-glycosyl compounds"]	query	0.3333333333333333	1.6691704223001168E-4	5635.768013771418	1984.0	-3874.0
H__sapiens__1_-773768	H__sapiens__1_-773768	PDK3	PDK3	Q15120	ENSP00000498864	5165	NP_005382	NM_005391		-0.12715048997485823	0.8806011409815009	["GO:0006631","GO:0006085","GO:0042593","GO:0071616","GO:0071456","GO:0006637","GO:0009746","GO:0030808","GO:0070482","GO:0006109","GO:0005996","GO:0070542","GO:0019216","GO:0006140","GO:0071453","GO:0035384","GO:0044272","GO:0042762","GO:0019318","GO:0072522","GO:0006090","GO:0046390","GO:0001666","GO:0009152","GO:0006006","GO:1901293","GO:0051354","GO:0033500","GO:0006084","GO:0034032","GO:0006…	["fatty acid metabolic process","acetyl-CoA biosynthetic process","glucose homeostasis","acyl-CoA biosynthetic process","cellular response to hypoxia","acyl-CoA metabolic process","response to hexose","regulation of nucleotide biosynthetic process","response to oxygen levels","regulation of carbohydrate metabolic process","monosaccharide metabolic process","response to fatty acid","regulation of …	query	0.3333333333333333	1.5130882130428205E-4	1837.636268526616	1271.0	-3874.0
H__sapiens__1_-839832	H__sapiens__1_-839832	C8orf44-SGK3	C8orf44-SGK3	ENSG00000288602	ENSP00000501424	100533105	NP_001191102	NM_001204173		-0.0046546180519046075	0.9953561978948258			query	0.3333333333333333	1.2948336138806163E-4	2.549230123529217	62.0	-3874.0
H__sapiens__1_-775181	H__sapiens__1_-775181	NFATC2	NFATC2	Q13469	ENSP00000477370	4773	NP_775114	NM_173091	NFATp	-0.07359507334114532	0.92904781391283	["GO:0051150","GO:0042113","GO:0042692","GO:0051148","GO:0030217","GO:0051251","GO:0097720","GO:0070665","GO:0002696","GO:0030888","GO:0050670","GO:1905063","GO:0051147","GO:0019722","GO:0070663","GO:0050864","GO:0050871","GO:0050867","GO:0030098","GO:0045066","GO:0070661","GO:0045619","GO:0035886","GO:1902105","GO:0051145","GO:0038093","GO:0046651","GO:0050671","GO:0048016","GO:0050863","GO:0050…	["regulation of smooth muscle cell differentiation","B cell activation","muscle cell differentiation","negative regulation of muscle cell differentiation","T cell differentiation","positive regulation of lymphocyte activation","calcineurin-mediated signaling","positive regulation of leukocyte proliferation","positive regulation of leukocyte activation","regulation of B cell proliferation","regula…	query	0.3333333333333333	1.485222040695084E-4	1607.3808823177023	1223.0	-3874.0
H__sapiens__1_-774173	H__sapiens__1_-774173	VDAC3	VDAC3	Q9Y277	ENSP00000430908	7419	NP_005653	NM_005662	HD-VDAC3	-0.14602972601214445	0.8641320156040597	["GO:0019867","GO:0005244","GO:0022832","GO:0031968"]	["outer membrane","voltage-gated ion channel activity","voltage-gated channel activity","organelle outer membrane"]	query	0.3333333333333333	1.460493646852636E-4	1300.9249668920015	1077.0	-3874.0
H__sapiens__1_-790315	H__sapiens__1_-790315	MYO1C	MYO1C	O00159	ENSP00000496954	4641	NP_203693	NM_033375	myr2	-0.16127138407051442	0.8510610753454002	["GO:0006909","GO:0045216","GO:0002431","GO:1904951","GO:0043297","GO:0098857","GO:1905475","GO:0032388","GO:0016459","GO:0003779","GO:0035924","GO:0051222","GO:0038094","GO:0098858","GO:0070830","GO:0015629","GO:0002433","GO:1903829","GO:0016323","GO:0051648","GO:1903533","GO:0030335","GO:0051650","GO:0045178","GO:0033157","GO:0120192","GO:0030048","GO:0038093","GO:1901888","GO:0090316","GO:0120…	["phagocytosis","cell-cell junction organization","Fc receptor mediated stimulatory signaling pathway","positive regulation of establishment of protein localization","apical junction assembly","membrane microdomain","regulation of protein localization to membrane","positive regulation of intracellular transport","myosin complex","actin binding","cellular response to vascular endothelial growth fa…	query	0.3333333333333333	1.5482272797646694E-4	2334.2510096165556	1422.0	-3874.0
H__sapiens__1_-778396	H__sapiens__1_-778396	GGA3	GGA3	Q9NZ52	ENSP00000496890	23163	NP_619525	NM_138619	KIAA0154	-0.15137223138925354	0.8595276959170146	["GO:0055037","GO:0032182","GO:0042987","GO:0042982","GO:0031647","GO:0010008","GO:0005769","GO:0034205","GO:0050435","GO:1990778","GO:1902991","GO:1902003","GO:1902992","GO:0072659"]	["recycling endosome","ubiquitin-like protein binding","amyloid precursor protein catabolic process","amyloid precursor protein metabolic process","regulation of protein stability","endosome membrane","early endosome","amyloid-beta formation","amyloid-beta metabolic process","protein localization to cell periphery","regulation of amyloid precursor protein catabolic process","regulation of amyloid…	query	0.3333333333333333	1.474708745022858E-4	1418.1671452056353	1013.0	-3874.0
H__sapiens__1_-785351	H__sapiens__1_-785351	CXCL8	CXCL8	P10145	ENSP00000385908	3576	NP_001341769	NM_001354840	TSG-1	-0.15946021097268231	0.8526038910010354	["GO:1990869","GO:1990266","GO:0006959","GO:0070555","GO:0035966","GO:0034976","GO:0044409","GO:0008277","GO:0034612","GO:0006984","GO:0002687","GO:0001525","GO:0035967","GO:0051701","GO:1901342","GO:0045069","GO:0030335","GO:0043112","GO:0030595","GO:0030593","GO:0002685","GO:0050900","GO:0050920","GO:0006986","GO:0071216","GO:0005125","GO:0140467","GO:0071774","GO:0052372","GO:1903900","GO:1990…	["cellular response to chemokine","neutrophil migration","humoral immune response","response to interleukin-1","response to topologically incorrect protein","response to endoplasmic reticulum stress","entry into host","regulation of G protein-coupled receptor signaling pathway","response to tumor necrosis factor","ER-nucleus signaling pathway","positive regulation of leukocyte migration","angioge…	query	0.3333333333333333	1.6E-4	4255.165351473909	1878.0	-3874.0
H__sapiens__1_-776414	H__sapiens__1_-776414	IL2	IL2	P60568	ENSP00000226730	3558	NP_000577	NM_000586	TCGF	-0.12932079204257657	0.8786920429134903	["GO:0097696","GO:0042113","GO:0030217","GO:0051251","GO:1903708","GO:0070665","GO:0002699","GO:0070227","GO:0018212","GO:0002702","GO:0002313","GO:0071887","GO:0050798","GO:0007259","GO:0045621","GO:0050727","GO:0045066","GO:0045619","GO:1902105","GO:0019207","GO:0030183","GO:0046651","GO:0022409","GO:0050863","GO:0070229","GO:0042100","GO:2000107","GO:1903039","GO:0002700","GO:0042509","GO:0032…	["receptor signaling pathway via STAT","B cell activation","T cell differentiation","positive regulation of lymphocyte activation","positive regulation of hemopoiesis","positive regulation of leukocyte proliferation","positive regulation of immune effector process","lymphocyte apoptotic process","peptidyl-tyrosine modification","positive regulation of production of molecular mediator of immune re…	query	0.3333333333333333	1.5003750937734434E-4	1718.5407715763322	1293.0	-3874.0
H__sapiens__1_-784286	H__sapiens__1_-784286	FBP1	FBP1	P09467	ENSP00000498145	2203	NP_001121100	NM_001127628		-0.18747199149465252	0.82905233837207	["GO:0034637","GO:1903578","GO:0071248","GO:0009132","GO:0043467","GO:1903579","GO:0010038","GO:0030246","GO:0006109","GO:0005996","GO:0009135","GO:0007265","GO:0006140","GO:0006110","GO:0046364","GO:1900543","GO:0009311","GO:0050308","GO:0019318","GO:0043255","GO:0042493","GO:0016051","GO:0051056","GO:0006090","GO:0045926","GO:0006006","GO:0010677","GO:0062014","GO:0046578","GO:0001558","GO:0006…	["cellular carbohydrate biosynthetic process","regulation of ATP metabolic process","cellular response to metal ion","nucleoside diphosphate metabolic process","regulation of generation of precursor metabolites and energy","negative regulation of ATP metabolic process","response to metal ion","carbohydrate binding","regulation of carbohydrate metabolic process","monosaccharide metabolic process",…	query	0.3333333333333333	1.7295053614666206E-4	6327.208866741126	2149.0	-3874.0
H__sapiens__1_-774629	H__sapiens__1_-774629	GNPTG	GNPTG	Q9UJJ9	ENSP00000480060	84572	NP_115909	NM_032520	GNPTAG	-0.07741589864880062	0.9255048573327067	["GO:0044262"]	["cellular carbohydrate metabolic process"]	query	0.3333333333333333	1.5213753232922562E-4	2229.9935391310037	1264.0	-3874.0
H__sapiens__1_-774576	H__sapiens__1_-774576	IGBP1	IGBP1	P78318	ENSP00000363661	3476	NP_001542	NM_001551	Î±4	-0.2174414268123675	0.8045747300463073	["GO:0032886","GO:0043281","GO:0032872","GO:0031098","GO:0043409","GO:0019903","GO:0070303","GO:0010466","GO:2000116","GO:0010951","GO:0019902","GO:0052548","GO:0045861","GO:0019208","GO:0070302","GO:0051403","GO:0001933","GO:2000117","GO:0052547","GO:0051346"]	["regulation of microtubule-based process","regulation of cysteine-type endopeptidase activity involved in apoptotic process","regulation of stress-activated MAPK cascade","stress-activated protein kinase signaling cascade","negative regulation of MAPK cascade","protein phosphatase binding","negative regulation of stress-activated protein kinase signaling cascade","negative regulation of peptidas…	query	0.3333333333333333	1.5688735487919673E-4	3234.066591602393	1497.0	-3874.0
H__sapiens__1_-787260	H__sapiens__1_-787260	CA8	CA8	P35219	ENSP00000314407	767	NP_004047	NM_004056	CALS	-0.11226581053638864	0.893806642698374	["GO:0016829","GO:0016835"]	["lyase activity","carbon-oxygen lyase activity"]	query	0.3333333333333333	1.529753709652746E-4	2283.1859370175503	1380.0	-3874.0
H__sapiens__1_-824693	H__sapiens__1_-824693	SSX2B	SSX2B	ENSG00000268447	ENSP00000478714	727837	NP_001265631	NM_001278702	CT5.2b	-0.09553557158560909	0.9088860305613955			query	0.3333333333333333	1.4549687181725592E-4	833.4199104705247	883.0	-3874.0
H__sapiens__1_-789911	H__sapiens__1_-789911	PFN3	PFN3	P60673	ENSP00000351379	345456	NP_001025057	NM_001029886		-0.007412072120737363	0.9926153295429918	["GO:0051258","GO:1902903","GO:0051495","GO:1902905","GO:0032535","GO:0030832","GO:0110053","GO:0032956","GO:0030041","GO:0008154","GO:0051017","GO:0032231","GO:0032271","GO:0008064","GO:0061572"]	["protein polymerization","regulation of supramolecular fiber organization","positive regulation of cytoskeleton organization","positive regulation of supramolecular fiber organization","regulation of cellular component size","regulation of actin filament length","regulation of actin filament organization","regulation of actin cytoskeleton organization","actin filament polymerization","actin poly…	query	0.3333333333333333	1.2997140629061605E-4	10.492428848031722	83.0	-3874.0
H__sapiens__1_-773698	H__sapiens__1_-773698	CTNNA2	CTNNA2	P26232	ENSP00000486160	1496	NP_004380	NM_004389	CT114	-0.18573818043658533	0.8304910053119825	["GO:0032273","GO:0030838","GO:0032535","GO:0030832","GO:0042692","GO:0050905","GO:0030041","GO:0016358","GO:0050807","GO:0051494","GO:0003779","GO:0007420","GO:0051147","GO:0034315","GO:1902904","GO:0034314","GO:0032271","GO:0008064","GO:0005911","GO:0051258","GO:1902903","GO:0051495","GO:1902905","GO:0050808","GO:0110053","GO:0050803","GO:0032956","GO:0001764","GO:0008154","GO:0051125","GO:0030…	["positive regulation of protein polymerization","positive regulation of actin filament polymerization","regulation of cellular component size","regulation of actin filament length","muscle cell differentiation","neuromuscular process","actin filament polymerization","dendrite development","regulation of synapse organization","negative regulation of cytoskeleton organization","actin binding","bra…	query	0.3333333333333333	1.6977928692699492E-4	6279.2504303635005	2314.0	-3874.0
H__sapiens__1_-809894	H__sapiens__1_-809894	DEFA1B	DEFA1B	ENSG00000285176	ENSP00000496340	728358	NP_001289194	NM_001302265		-2.956806355466307E-4	0.9997043630736644			query	0.25	1.1377858686995108E-4	3.8824115760812314	10.0	-3874.0
H__sapiens__1_-774404	H__sapiens__1_-774404	ABCB1	ABCB1	P08183	ENSP00000478255	5243	NP_001335875	NM_001348946	PGY1	-0.18207615962181195	0.8335378560704099	["GO:0010232","GO:0032409","GO:0022804","GO:0015399","GO:0044389","GO:0006869","GO:0005319","GO:0044839","GO:0015748","GO:0032412","GO:0006970","GO:1903793","GO:0032411","GO:0034767","GO:0034764","GO:0009897","GO:0045177","GO:0003018","GO:1903959","GO:0043270","GO:0044070","GO:0009986","GO:0016324","GO:0022898","GO:0150104","GO:0034765","GO:0032414"]	["vascular transport","regulation of transporter activity","active transmembrane transporter activity","primary active transmembrane transporter activity","ubiquitin-like protein ligase binding","lipid transport","lipid transporter activity","cell cycle G2/M phase transition","organophosphate ester transport","regulation of ion transmembrane transporter activity","response to osmotic stress","pos…	query	0.3333333333333333	1.6431153466973383E-4	4099.737834177416	1968.0	-3874.0
H__sapiens__1_-787818	H__sapiens__1_-787818	SETD2	SETD2	Q9BYW2	ENSP00000491413	29072	NP_054878	NM_014159	KMT3A	-0.1560331162283395	0.8555308579466463	["GO:0051302","GO:0007492","GO:0000910","GO:0032607","GO:0001704","GO:0032647","GO:0032606","GO:0046822","GO:0009615","GO:0032481","GO:0048598","GO:2001020","GO:0001706","GO:0007369","GO:0032479","GO:0032386","GO:0051301","GO:0000018","GO:0006282"]	["regulation of cell division","endoderm development","cytokinesis","interferon-alpha production","formation of primary germ layer","regulation of interferon-alpha production","type I interferon production","regulation of nucleocytoplasmic transport","response to virus","positive regulation of type I interferon production","embryonic morphogenesis","regulation of response to DNA damage stimulus",…	query	0.3333333333333333	1.432870038687491E-4	913.0390116723765	849.0	-3874.0
H__sapiens__1_-786458	H__sapiens__1_-786458	CNTNAP2	CNTNAP2	Q9UHC6	ENSP00000488754	26047	NP_054860	NM_014141	KIAA0868	-0.14662582788043618	0.8636170583938336	["GO:0009612","GO:0021536","GO:0030424","GO:0005887","GO:0007612","GO:0071695","GO:0051703","GO:0035637","GO:1990351","GO:0050890","GO:0021700","GO:0031252","GO:0030900","GO:0007611","GO:0007420","GO:0042551","GO:1902495","GO:0031253","GO:0044297","GO:0007610"]	["response to mechanical stimulus","diencephalon development","axon","integral component of plasma membrane","learning","anatomical structure maturation","intraspecies interaction between organisms","multicellular organismal signaling","transporter complex","cognition","developmental maturation","cell leading edge","forebrain development","learning or memory","brain development","neuron maturatio…	query	0.3333333333333333	1.6504373659019642E-4	4901.433150505774	2158.0	-3874.0
H__sapiens__1_-776086	H__sapiens__1_-776086	GCK	GCK	P35557	ENSP00000500264	2645	NP_277043	NM_033508	MODY2	-0.16768767716990132	0.8456178992212874	["GO:0034637","GO:0009306","GO:0042593","GO:1903578","GO:0044042","GO:0009132","GO:0090277","GO:0005979","GO:0061620","GO:0032885","GO:0043467","GO:0009746","GO:0051222","GO:0030246","GO:0070875","GO:0005978","GO:0000271","GO:0009914","GO:0006109","GO:0005996","GO:0009135","GO:0044321","GO:0046887","GO:0030073","GO:0006140","GO:0050714","GO:0046364","GO:0006112","GO:0030072","GO:0019674","GO:1901…	["cellular carbohydrate biosynthetic process","protein secretion","glucose homeostasis","regulation of ATP metabolic process","glucan metabolic process","nucleoside diphosphate metabolic process","positive regulation of peptide hormone secretion","regulation of glycogen biosynthetic process","glycolytic process through glucose-6-phosphate","regulation of polysaccharide biosynthetic process","regu…	query	0.3333333333333333	1.5830299192654741E-4	3175.951270722065	1528.0	-3874.0
H__sapiens__1_-786595	H__sapiens__1_-786595	INHBC	INHBC	P55103	ENSP00000308716	3626	NP_005529	NM_005538		-0.12507844500224558	0.882427677828294	["GO:0060393","GO:0090092","GO:0090100","GO:0060389","GO:0005126","GO:0007178"]	["regulation of pathway-restricted SMAD protein phosphorylation","regulation of transmembrane receptor protein serine/threonine kinase signaling pathway","positive regulation of transmembrane receptor protein serine/threonine kinase signaling pathway","pathway-restricted SMAD protein phosphorylation","cytokine receptor binding","transmembrane receptor protein serine/threonine kinase signaling pat…	query	0.3333333333333333	1.4515894904920887E-4	1259.5097821592647	950.0	-3874.0
H__sapiens__1_-781076	H__sapiens__1_-781076	ATP1B1	ATP1B1	P05026	ENSP00000477015	481	NP_001668	NM_001677	ATP1B	-0.1671453824100633	0.8460765977405207	["GO:0055067","GO:0006942","GO:1903522","GO:0006941","GO:0015399","GO:0008554","GO:0030004","GO:1901021","GO:0070588","GO:0060048","GO:0032412","GO:1990778","GO:0055078","GO:0032411","GO:0001508","GO:0034767","GO:0043462","GO:0051928","GO:0019722","GO:0090533","GO:0043266","GO:0140115","GO:0005911","GO:0034764","GO:0019829","GO:0044291","GO:0045177","GO:0098533","GO:0055075","GO:1904427","GO:0090…	["monovalent inorganic cation homeostasis","regulation of striated muscle contraction","regulation of blood circulation","striated muscle contraction","primary active transmembrane transporter activity","sodium transmembrane transporter activity, phosphorylative mechanism","cellular monovalent inorganic cation homeostasis","positive regulation of calcium ion transmembrane transporter activity","c…	query	0.3333333333333333	1.6165535079211123E-4	3629.037886449465	1764.0	-3874.0
H__sapiens__1_-773100	H__sapiens__1_-773100	BID	BID	P55957	ENSP00000480414	637	NP_932071	NM_197967		-0.15407370655378008	0.8572088367737114	["GO:0097193","GO:1902110","GO:0043281","GO:1905710","GO:1905475","GO:0010950","GO:0043065","GO:0097345","GO:0051222","GO:0051205","GO:0035794","GO:1901030","GO:0007006","GO:1901028","GO:2001236","GO:1902108","GO:2001233","GO:0090559","GO:0006839","GO:0033157","GO:0072655","GO:0010821","GO:0045862","GO:0001836","GO:0070997","GO:0031968","GO:0032386","GO:1902686","GO:0010952","GO:1904951","GO:1903…	["intrinsic apoptotic signaling pathway","positive regulation of mitochondrial membrane permeability involved in apoptotic process","regulation of cysteine-type endopeptidase activity involved in apoptotic process","positive regulation of membrane permeability","regulation of protein localization to membrane","positive regulation of endopeptidase activity","positive regulation of apoptotic proces…	query	0.3333333333333333	1.558846453624318E-4	2548.3818459953723	1501.0	-3874.0
H__sapiens__1_-785877	H__sapiens__1_-785877	DEFB4A	DEFB4A	ENSG00000285181	ENSP00000496499				HBD-2	-0.005225428149484525	0.994788200651082	["GO:0001664","GO:0006959","GO:0042742","GO:0042379","GO:0001906","GO:0005126","GO:0048020","GO:0019730"]	["G protein-coupled receptor binding","humoral immune response","defense response to bacterium","chemokine receptor binding","cell killing","cytokine receptor binding","CCR chemokine receptor binding","antimicrobial humoral response"]	query	0.25	1.2110936175366356E-4	13.197361564790967	11.0	-3874.0
H__sapiens__1_-777321	H__sapiens__1_-777321	HDAC1	HDAC1	Q13547	ENSP00000407859	3065	NP_004955	NM_004964	RPD3L1	-0.24283436242018921	0.7844014293661674	["GO:0051146","GO:0006476","GO:0051817","GO:0030326","GO:0042692","GO:0035601","GO:0030099","GO:0007623","GO:0030518","GO:0072331","GO:0005667","GO:0035113","GO:0061629","GO:0051154","GO:0048545","GO:0050817","GO:0043010","GO:0097242","GO:0035108","GO:0070822","GO:0048525","GO:0030219","GO:0051153","GO:0048511","GO:0014902","GO:0051702","GO:0051851","GO:0060070","GO:0090596","GO:0032897","GO:0071…	["striated muscle cell differentiation","protein deacetylation","modulation of process of other organism involved in symbiotic interaction","embryonic limb morphogenesis","muscle cell differentiation","protein deacylation","myeloid cell differentiation","circadian rhythm","intracellular steroid hormone receptor signaling pathway","signal transduction by p53 class mediator","transcription regulato…	query	0.3333333333333333	1.7229496898690558E-4	6911.552246265513	2434.0	-3874.0
H__sapiens__1_-776747	H__sapiens__1_-776747	IL17A	IL17A	Q16552	ENSP00000497968	3605	NP_002181	NM_002190	IL17	-0.11365560605126566	0.8925652970433046	["GO:0032611","GO:0032602","GO:0045639","GO:0050729","GO:0045670","GO:0030099","GO:1903708","GO:1903555","GO:0045637","GO:0032655","GO:0032732","GO:0002761","GO:1902107","GO:0032615","GO:1900015","GO:0032651","GO:0050727","GO:0030316","GO:0032680","GO:0002532","GO:1902105","GO:0032612","GO:0032635","GO:0032652","GO:0002763","GO:0002534","GO:1903557","GO:0002573","GO:0071706","GO:0031349","GO:0032…	["interleukin-1 beta production","chemokine production","positive regulation of myeloid cell differentiation","positive regulation of inflammatory response","regulation of osteoclast differentiation","myeloid cell differentiation","positive regulation of hemopoiesis","regulation of tumor necrosis factor superfamily cytokine production","regulation of myeloid cell differentiation","regulation of i…	query	0.3333333333333333	1.4515894904920887E-4	890.5190780670256	931.0	-3874.0
H__sapiens__1_-781186	H__sapiens__1_-781186	CREB3L4	CREB3L4	Q8TEY5	ENSP00000402308	148327	NP_570968	NM_130898	hJAL	-0.08987247514366162	0.9140477416460926			query	0.3333333333333333	1.520912547528517E-4	2684.3349234314737	1312.0	-3874.0
H__sapiens__1_-775736	H__sapiens__1_-775736	SLC17A7	SLC17A7	Q9P2U7	ENSP00000472086	57030	NP_064705	NM_020309	VGLUT1	-0.13712565185944248	0.8718606683350321	["GO:0099504","GO:0006835","GO:0030665","GO:0030662","GO:0006836","GO:0022804","GO:0015800","GO:0030133","GO:0015849","GO:0030658","GO:0099003","GO:0046942","GO:0006865","GO:0070382","GO:0060198","GO:0030135","GO:0022853","GO:0098793","GO:0030136"]	["synaptic vesicle cycle","dicarboxylic acid transport","clathrin-coated vesicle membrane","coated vesicle membrane","neurotransmitter transport","active transmembrane transporter activity","acidic amino acid transport","transport vesicle","organic acid transport","transport vesicle membrane","vesicle-mediated transport in synapse","carboxylic acid transport","amino acid transport","exocytic vesi…	query	0.3333333333333333	1.5153811183512653E-4	2011.1062632910357	1313.0	-3874.0
H__sapiens__1_-774149	H__sapiens__1_-774149	LAMP3	LAMP3	Q9UQV4	ENSP00000420589	27074	NP_055213	NM_014398	TSC403	-0.14302378915149014	0.8667334497968957	["GO:0043281","GO:0061136","GO:1903362","GO:0044409","GO:0005770","GO:0010466","GO:2000116","GO:0010951","GO:0031330","GO:0010008","GO:0052548","GO:0019058","GO:0045861","GO:1903050","GO:0052126","GO:2000117","GO:0030667","GO:0009895","GO:0050792","GO:0052547","GO:0051346","GO:0043903","GO:0051701"]	["regulation of cysteine-type endopeptidase activity involved in apoptotic process","regulation of proteasomal protein catabolic process","regulation of cellular protein catabolic process","entry into host","late endosome","negative regulation of peptidase activity","regulation of cysteine-type endopeptidase activity","negative regulation of endopeptidase activity","negative regulation of cellula…	query	0.3333333333333333	1.5750511891636477E-4	2735.9167533203945	1479.0	-3874.0
H__sapiens__1_-780047	H__sapiens__1_-780047	TANK	TANK	Q92844	ENSP00000412622	10010	NP_597841	NM_133484	I-TRAF	-0.16227699211091817	0.8502056716576567	["GO:0071478","GO:0070555","GO:0044389","GO:0016504","GO:1903322","GO:0070646","GO:0002756","GO:0034612","GO:0045862","GO:0061134","GO:0002221","GO:1903320","GO:0071214","GO:0007249","GO:0002224","GO:0052547","GO:0104004","GO:0043122","GO:0010212","GO:0010952"]	["cellular response to radiation","response to interleukin-1","ubiquitin-like protein ligase binding","peptidase activator activity","positive regulation of protein modification by small protein conjugation or removal","protein modification by small protein removal","MyD88-independent toll-like receptor signaling pathway","response to tumor necrosis factor","positive regulation of proteolysis","p…	query	0.3333333333333333	1.5071590052750564E-4	1773.6963395644639	1295.0	-3874.0
H__sapiens__1_-774329	H__sapiens__1_-774329	KAT6A	KAT6A	Q92794	ENSP00000497780	7994	NP_006757	NM_006766	ZNF220	-0.1484127988692003	0.8620751778233087	["GO:0016746","GO:0016573","GO:0006473","GO:0007568","GO:0007569","GO:0016747","GO:0006475","GO:0018393","GO:0072331","GO:0043543","GO:0018394"]	["transferase activity, transferring acyl groups","histone acetylation","protein acetylation","aging","cell aging","transferase activity, transferring acyl groups other than amino-acyl groups","internal protein amino acid acetylation","internal peptidyl-lysine acetylation","signal transduction by p53 class mediator","protein acylation","peptidyl-lysine acetylation"]	query	0.3333333333333333	1.465630954125751E-4	1324.6837511406163	1040.0	-3874.0
H__sapiens__1_-782975	H__sapiens__1_-782975	SPATA2	SPATA2	Q9UM82	ENSP00000416799	9825	NP_006029	NM_006038	PPP1R145	-0.12785485813399708	0.8799810919739168	["GO:0071356","GO:0062098","GO:0060090","GO:0060759","GO:0001959","GO:0097300","GO:0070266","GO:0070646","GO:0034612","GO:0033209","GO:0030674","GO:0070265","GO:0035591","GO:0010939"]	["cellular response to tumor necrosis factor","regulation of programmed necrotic cell death","molecular adaptor activity","regulation of response to cytokine stimulus","regulation of cytokine-mediated signaling pathway","programmed necrotic cell death","necroptotic process","protein modification by small protein removal","response to tumor necrosis factor","tumor necrosis factor-mediated signalin…	query	0.3333333333333333	1.4386419220256078E-4	904.4128853534778	831.0	-3874.0
H__sapiens__1_-828723	H__sapiens__1_-828723	CCL18	CCL18	P55774	ENSP00000483347	6362	NP_002979	NM_002988	SCYA18	-0.13270241913341893	0.8757256525365185	["GO:1990869","GO:0071621","GO:1990266","GO:0070372","GO:0070555","GO:0042379","GO:0072676","GO:0030595","GO:0050900","GO:0034341","GO:0005125","GO:0060326","GO:0043087","GO:0034612","GO:0097530","GO:0097529","GO:0001664","GO:1990868","GO:0071674","GO:0005126","GO:0070371"]	["cellular response to chemokine","granulocyte chemotaxis","neutrophil migration","regulation of ERK1 and ERK2 cascade","response to interleukin-1","chemokine receptor binding","lymphocyte migration","leukocyte chemotaxis","leukocyte migration","response to interferon-gamma","cytokine activity","cell chemotaxis","regulation of GTPase activity","response to tumor necrosis factor","granulocyte migr…	query	0.3333333333333333	1.527417137620284E-4	2237.9125594810484	1341.0	-3874.0
H__sapiens__1_-806480	H__sapiens__1_-806480	IFNA17	IFNA17	P01571	ENSP00000411940	3451	NP_067091	NM_021268	LEIF2C1	-0.13905488224456472	0.8701802697013326	["GO:0097696","GO:0018209","GO:0042113","GO:0042501","GO:0043331","GO:0071357","GO:0046425","GO:0033139","GO:1904892","GO:0033135","GO:0046651","GO:0033138","GO:0034340","GO:0032943","GO:0007259","GO:0005126","GO:0030101","GO:0018105","GO:0030098","GO:0007599","GO:0050817","GO:0002285","GO:0070661"]	["receptor signaling pathway via STAT","peptidyl-serine modification","B cell activation","serine phosphorylation of STAT protein","response to dsRNA","cellular response to type I interferon","regulation of receptor signaling pathway via JAK-STAT","regulation of peptidyl-serine phosphorylation of STAT protein","regulation of receptor signaling pathway via STAT","regulation of peptidyl-serine phos…	query	0.3333333333333333	1.6347882949158083E-4	4340.307176727827	1713.0	-3874.0
H__sapiens__1_-775525	H__sapiens__1_-775525	ABCC1	ABCC1	P33527	ENSP00000483316	4363	NP_004987	NM_004996	GS-X	-0.14151543134373912	0.8680417804304457	["GO:1901568","GO:0010232","GO:0042887","GO:0071715","GO:1904645","GO:0022804","GO:0015399","GO:0006869","GO:0005319","GO:0015849","GO:0042626","GO:0015748","GO:0006690","GO:0016323","GO:0042910","GO:0050727","GO:0045177","GO:0003018","GO:1901653","GO:0045178","GO:0006766","GO:0046942","GO:0090482","GO:1901571","GO:0006767","GO:0072349","GO:0031349"]	["fatty acid derivative metabolic process","vascular transport","amide transmembrane transporter activity","icosanoid transport","response to amyloid-beta","active transmembrane transporter activity","primary active transmembrane transporter activity","lipid transport","lipid transporter activity","organic acid transport","ATPase-coupled transmembrane transporter activity","organophosphate ester …	query	0.3333333333333333	1.5479876160990713E-4	2277.7624669273337	1401.0	-3874.0
H__sapiens__1_-786474	H__sapiens__1_-786474	KLK15	KLK15	Q9H2R5	ENSP00000472523	55554	NP_059979	NM_017509	prostinogen	-0.08983819802276982	0.914079073108007	["GO:0008236"]	["serine-type peptidase activity"]	query	0.3333333333333333	1.421262080727686E-4	493.38280391824134	735.0	-3874.0
H__sapiens__1_-777950	H__sapiens__1_-777950	TNFSF10	TNFSF10	P50591	ENSP00000404008	8743	NP_003801	NM_003810	TRAIL	-0.17174073279003677	0.8421974990607239	["GO:0043281","GO:0097191","GO:2000116","GO:0010950","GO:0043065","GO:2001234","GO:2001056","GO:0007249","GO:2001236","GO:2001233","GO:0008625","GO:2001237","GO:1902041","GO:0043280","GO:0043122","GO:0010821","GO:0010822","GO:0045862","GO:0001836","GO:0052548","GO:0090199","GO:0008637","GO:0052547","GO:2001235","GO:0010952"]	["regulation of cysteine-type endopeptidase activity involved in apoptotic process","extrinsic apoptotic signaling pathway","regulation of cysteine-type endopeptidase activity","positive regulation of endopeptidase activity","positive regulation of apoptotic process","negative regulation of apoptotic signaling pathway","positive regulation of cysteine-type endopeptidase activity","I-kappaB kinase…	query	0.3333333333333333	1.5654351909830932E-4	2630.3008020253756	1572.0	-3874.0
H__sapiens__1_-805682	H__sapiens__1_-805682	IFNA13	IFNA13	ENSG00000233816	ENSP00000480467	3447	NP_008831	NM_006900		-0.014009264616649352	0.9860884084894552			query	0.3333333333333333	1.2983640612827837E-4	8.981669463209803	90.0	-3874.0
H__sapiens__1_-788526	H__sapiens__1_-788526	STING1	TMEM173	Q86WV6	ENSP00000500885	340061	NP_938023	NM_198282	TMEM173	-0.054983358783961093	0.9465008987483644	["GO:0071359","GO:0061912","GO:0043393","GO:0016241","GO:0032479","GO:1905037","GO:0051098","GO:0051607","GO:0032561","GO:0002833","GO:0010508","GO:0043331","GO:0032606","GO:0050691","GO:0045089","GO:0051099","GO:0009615","GO:0019867","GO:0019001","GO:0005789","GO:0007033","GO:0031227","GO:0045088","GO:0031968","GO:0010506","GO:0031349","GO:1903008","GO:0043330","GO:0050688","GO:0005793","GO:0016…	["cellular response to dsRNA","selective autophagy","regulation of protein binding","regulation of macroautophagy","regulation of type I interferon production","autophagosome organization","regulation of binding","defense response to virus","guanyl ribonucleotide binding","positive regulation of response to biotic stimulus","positive regulation of autophagy","response to dsRNA","type I interferon…	query	0.3333333333333333	1.539408866995074E-4	2040.769204191659	1281.0	-3874.0
H__sapiens__1_-781846	H__sapiens__1_-781846	NOTCH1	NOTCH1	P46531	ENSP00000498587	4851	NP_060087	NM_017617		-0.17227391453069502	0.841748574422042	["GO:0060421","GO:0097696","GO:0046620","GO:0003158","GO:0043065","GO:0007219","GO:0001525","GO:0022408","GO:0098727","GO:0003203","GO:0007265","GO:0045177","GO:0045687","GO:0090257","GO:0050769","GO:0035265","GO:0008593","GO:1902742","GO:0002040","GO:0007389","GO:0030198","GO:0060485","GO:0007409","GO:0045926","GO:0010633","GO:0046578","GO:1990845","GO:0014743","GO:0055006","GO:0070372","GO:0043…	["positive regulation of heart growth","receptor signaling pathway via STAT","regulation of organ growth","endothelium development","positive regulation of apoptotic process","Notch signaling pathway","angiogenesis","negative regulation of cell-cell adhesion","maintenance of cell number","endocardial cushion morphogenesis","Ras protein signal transduction","apical part of cell","positive regulati…	query	0.3333333333333333	1.6043638697256537E-4	3680.5891433986503	1846.0	-3874.0
H__sapiens__1_-781137	H__sapiens__1_-781137	MCL1	MCL1	Q07820	ENSP00000477624	4170	NP_877495	NM_182763	Mcl-1	-0.14355848923702133	0.8662701312264349	["GO:0097193","GO:0042887","GO:1903203","GO:0062197","GO:0036473","GO:0043523","GO:1902882","GO:0036475","GO:1901216","GO:1903201","GO:0097191","GO:0043065","GO:0031330","GO:2001234","GO:1902175","GO:2001236","GO:2001233","GO:2001237","GO:0045165","GO:0006979","GO:0034599","GO:2001242","GO:0043276","GO:0019867","GO:0038034","GO:0051402","GO:2001239","GO:0070997","GO:1901099","GO:0031968","GO:0008…	["intrinsic apoptotic signaling pathway","amide transmembrane transporter activity","regulation of oxidative stress-induced neuron death","cellular response to chemical stress","cell death in response to oxidative stress","regulation of neuron apoptotic process","regulation of response to oxidative stress","neuron death in response to oxidative stress","positive regulation of neuron death","regul…	query	0.3333333333333333	1.511258878645912E-4	1871.9670715050545	1351.0	-3874.0
H__sapiens__1_-775018	H__sapiens__1_-775018	CACNA1I	CACNA1I	Q9P0X4	ENSP00000385680	8911	NP_066919	NM_021096	Cav3.3	-0.0986346655401103	0.9060736674983527	["GO:0005244","GO:0005887","GO:1903307","GO:0035637","GO:0045921","GO:1990351","GO:0051899","GO:0005262","GO:0005245","GO:0006816","GO:0072509","GO:0017158","GO:0015085","GO:0001508","GO:0022832","GO:1902495","GO:0017157","GO:0042391","GO:1903305","GO:0022843","GO:1903532","GO:0051047"]	["voltage-gated ion channel activity","integral component of plasma membrane","positive regulation of regulated secretory pathway","multicellular organismal signaling","positive regulation of exocytosis","transporter complex","membrane depolarization","calcium channel activity","voltage-gated calcium channel activity","calcium ion transport","divalent inorganic cation transmembrane transporter ac…	query	0.3333333333333333	1.4094432699083862E-4	498.78131770353616	683.0	-3874.0
H__sapiens__1_-773565	H__sapiens__1_-773565	ACAA1	ACAA1	P09110	ENSP00000486456	30	NP_001598	NM_001607		-0.13988008470221056	0.8694624910012853	["GO:0006631","GO:0044242","GO:0016627","GO:0034440","GO:0001676","GO:0005777","GO:0042581","GO:0016042","GO:0009410","GO:0120254","GO:0072662","GO:0007031","GO:0030258","GO:0019395","GO:0042579","GO:0034774","GO:0043574","GO:0009062","GO:0031907","GO:0046395","GO:0072329","GO:0016747","GO:0006635","GO:0008202","GO:0016746","GO:0033559","GO:0071466","GO:0072663","GO:0016054"]	["fatty acid metabolic process","cellular lipid catabolic process","oxidoreductase activity, acting on the CH-CH group of donors","lipid oxidation","long-chain fatty acid metabolic process","peroxisome","specific granule","lipid catabolic process","response to xenobiotic stimulus","olefinic compound metabolic process","protein localization to peroxisome","peroxisome organization","lipid modificat…	query	0.3333333333333333	1.5401201293700908E-4	2408.9844653318	1355.0	-3874.0
H__sapiens__1_-785931	H__sapiens__1_-785931	TLN2	TLN2	Q9Y4G6	ENSP00000490662	83660	NP_055874	NM_015059	KIAA0320	-0.1159224753220043	0.8905442597784028	["GO:0045216"]	["cell-cell junction organization"]	query	0.3333333333333333	1.5718327569946557E-4	2794.895049808204	1656.0	-3874.0
H__sapiens__1_-773524	H__sapiens__1_-773524	CDK14	CDK14	O94921	ENSP00000410770	5218	NP_036527	NM_012395	PFTK1	-0.1403038708343836	0.8690941029195478	["GO:0000082","GO:0061695","GO:0060070","GO:0000307","GO:1902554","GO:1902911","GO:0044843","GO:0004674","GO:0044839"]	["G1/S transition of mitotic cell cycle","transferase complex, transferring phosphorus-containing groups","canonical Wnt signaling pathway","cyclin-dependent protein kinase holoenzyme complex","serine/threonine protein kinase complex","protein kinase complex","cell cycle G1/S phase transition","protein serine/threonine kinase activity","cell cycle G2/M phase transition"]	query	0.3333333333333333	1.5812776723592663E-4	3105.230137118537	1758.0	-3874.0
H__sapiens__1_-781797	H__sapiens__1_-781797	IDNK	IDNK	Q5T6J7	ENSP00000436381	414328	NP_001338464	NM_001351535	hGntK	-0.05386498918324994	0.9475600287195596	["GO:0046395","GO:0072329","GO:0044275","GO:0016052","GO:0044262","GO:0016054"]	["carboxylic acid catabolic process","monocarboxylic acid catabolic process","cellular carbohydrate catabolic process","carbohydrate catabolic process","cellular carbohydrate metabolic process","organic acid catabolic process"]	query	0.3333333333333333	1.4132278123233464E-4	849.6030860955082	728.0	-3874.0
H__sapiens__1_-774158	H__sapiens__1_-774158	SYNJ2	SYNJ2	O15056	ENSP00000492532	8871	NP_003889	NM_003898	INPP5H	-0.11540661951589709	0.8910037707159075	["GO:0099504","GO:0034593","GO:0046839","GO:0052866","GO:0016791","GO:0019751","GO:0045017","GO:0046488","GO:0099003","GO:0006066","GO:1901616","GO:0046838","GO:0030258","GO:0043647","GO:0140238","GO:0008654","GO:0046434","GO:0046174","GO:0071545","GO:0046164","GO:0046474","GO:0036465","GO:0044262"]	["synaptic vesicle cycle","phosphatidylinositol bisphosphate phosphatase activity","phospholipid dephosphorylation","phosphatidylinositol phosphate phosphatase activity","phosphatase activity","polyol metabolic process","glycerolipid biosynthetic process","phosphatidylinositol metabolic process","vesicle-mediated transport in synapse","alcohol metabolic process","organic hydroxy compound cataboli…	query	0.3333333333333333	1.491869312248247E-4	1444.1870196707932	1119.0	-3874.0
H__sapiens__1_-788656	H__sapiens__1_-788656	FAF1	FAF1	Q9UNN5	ENSP00000434929	11124	NP_008982	NM_007051	UBXN3A	-0.1915433295225625	0.8256838478444679	["GO:0032182","GO:0061629","GO:0005789","GO:0045185","GO:0051235","GO:0051220","GO:0044389","GO:1903362","GO:0043433","GO:0019207","GO:0045732"]	["ubiquitin-like protein binding","RNA polymerase II-specific DNA-binding transcription factor binding","endoplasmic reticulum membrane","maintenance of protein location","maintenance of location","cytoplasmic sequestering of protein","ubiquitin-like protein ligase binding","regulation of cellular protein catabolic process","negative regulation of DNA-binding transcription factor activity","kinas…	query	0.3333333333333333	1.502178158329578E-4	2059.9722015960706	1274.0	-3874.0
H__sapiens__1_-785055	H__sapiens__1_-785055	RBPJ	RBPJ	Q06330	ENSP00000427344	3516	NP_976029	NM_203284	RBPSUH	-0.13949891648834326	0.8697939656357887	["GO:0060421","GO:0001659","GO:0003205","GO:0046620","GO:0001701","GO:0014706","GO:0003158","GO:0007219","GO:0060038","GO:0048608","GO:0010002","GO:0045445","GO:0030509","GO:0001708","GO:0003203","GO:0001837","GO:0043009","GO:0035265","GO:0008593","GO:0035909","GO:0003007","GO:0060485","GO:1990845","GO:0061323","GO:0048589","GO:0120161","GO:0043618","GO:0060840","GO:0009792","GO:0014855","GO:0055…	["positive regulation of heart growth","temperature homeostasis","cardiac chamber development","regulation of organ growth","in utero embryonic development","striated muscle tissue development","endothelium development","Notch signaling pathway","cardiac muscle cell proliferation","reproductive structure development","cardioblast differentiation","myoblast differentiation","BMP signaling pathway"…	query	0.3333333333333333	1.5463120457708364E-4	2351.591049504406	1532.0	-3874.0
H__sapiens__1_-780767	H__sapiens__1_-780767	UQCRC2	UQCRC2	P22695	ENSP00000485966	7385	NP_003357	NM_003366	UQCR2	-0.18381387394518572	0.8320906631669287	["GO:0045275","GO:0070069","GO:0045277","GO:0022900","GO:1990204","GO:0046034","GO:0098800","GO:0022904","GO:0042773","GO:0015980","GO:0098798","GO:0098803","GO:0042775","GO:0005743","GO:0005746","GO:0045333","GO:0070469","GO:0006119"]	["respiratory chain complex III","cytochrome complex","respiratory chain complex IV","electron transport chain","oxidoreductase complex","ATP metabolic process","inner mitochondrial membrane protein complex","respiratory electron transport chain","ATP synthesis coupled electron transport","energy derivation by oxidation of organic compounds","mitochondrial protein complex","respiratory chain comp…	query	0.3333333333333333	1.4947683109118088E-4	2381.9785423159815	1382.0	-3874.0
H__sapiens__1_-775565	H__sapiens__1_-775565	RBL2	RBL2	Q08999	ENSP00000462464	5934	NP_005602	NM_005611	Rb2	-0.15858872605549076	0.8533472462967985	["GO:1901991","GO:0072422","GO:0000082","GO:1902403","GO:0071158","GO:0045930","GO:0045787","GO:0044843","GO:0072413","GO:0072395","GO:0072331","GO:2000045","GO:2000134","GO:0061629","GO:1902400","GO:0090068","GO:0042770","GO:0000075","GO:0071156","GO:1902402","GO:0033613","GO:0044773","GO:0031570","GO:0072401","GO:1901988","GO:1902806","GO:0007093","GO:0044819","GO:0044774","GO:0007050","GO:0044…	["negative regulation of mitotic cell cycle phase transition","signal transduction involved in DNA damage checkpoint","G1/S transition of mitotic cell cycle","signal transduction involved in mitotic DNA integrity checkpoint","positive regulation of cell cycle arrest","negative regulation of mitotic cell cycle","positive regulation of cell cycle","cell cycle G1/S phase transition","signal transduc…	query	0.3333333333333333	1.4854426619132502E-4	1606.9555857193595	1180.0	-3874.0
H__sapiens__1_-775887	H__sapiens__1_-775887	DNASE2	DNASE2	O00115	ENSP00000466912	1777	NP_001366	NM_001375	DNL2	-0.1449365533376578	0.8650771776291921	["GO:0030262","GO:0006921","GO:0000737"]	["apoptotic nuclear changes","cellular component disassembly involved in execution phase of apoptosis","DNA catabolic process, endonucleolytic"]	query	0.3333333333333333	1.5295197308045274E-4	2107.0836594376624	1274.0	-3874.0
H__sapiens__1_-787666	H__sapiens__1_-787666	CHRM4	CHRM4	P08173	ENSP00000409378	1132	NP_001353621	NM_001366692		-0.1392927022424946	0.8699733480374237	["GO:0099589","GO:1905145","GO:0098926","GO:1905144","GO:0008227","GO:0007187","GO:0095500","GO:0007188","GO:0007193","GO:0004930"]	["serotonin receptor activity","cellular response to acetylcholine","postsynaptic signal transduction","response to acetylcholine","G protein-coupled amine receptor activity","G protein-coupled receptor signaling pathway, coupled to cyclic nucleotide second messenger","acetylcholine receptor signaling pathway","adenylate cyclase-modulating G protein-coupled receptor signaling pathway","adenylate …	query	0.3333333333333333	1.5309246785058175E-4	2293.5690834984575	1407.0	-3874.0
H__sapiens__1_-772921	H__sapiens__1_-772921	TKTL1	TKTL1	P51854	ENSP00000416552	8277	NP_036385	NM_012253	TKT2	-0.11396801701344703	0.8922864934129684	["GO:0006767","GO:0006006","GO:1901681","GO:0019318","GO:0006766","GO:0005996","GO:0019320","GO:0016052","GO:0046365"]	["water-soluble vitamin metabolic process","glucose metabolic process","sulfur compound binding","hexose metabolic process","vitamin metabolic process","monosaccharide metabolic process","hexose catabolic process","carbohydrate catabolic process","monosaccharide catabolic process"]	query	0.3333333333333333	1.5026296018031557E-4	1713.9319096975507	1117.0	-3874.0
H__sapiens__1_-784118	H__sapiens__1_-784118	IL22RA2	IL22RA2	Q969J5	ENSP00000340920	116379	NP_851827	NM_181310	IL-22BP	-0.06974679068767609	0.932629940596619	["GO:0050730","GO:0097696","GO:0019955","GO:0140375","GO:0018212","GO:0004896","GO:0018108","GO:0007259","GO:0007260"]	["regulation of peptidyl-tyrosine phosphorylation","receptor signaling pathway via STAT","cytokine binding","immune receptor activity","peptidyl-tyrosine modification","cytokine receptor activity","peptidyl-tyrosine phosphorylation","receptor signaling pathway via JAK-STAT","tyrosine phosphorylation of STAT protein"]	query	0.3333333333333333	1.463271875914545E-4	1192.5670716112186	984.0	-3874.0
H__sapiens__1_-774679	H__sapiens__1_-774679	ORC6	ORC6	Q9Y5N6	ENSP00000457282	23594	NP_055136	NM_014321	ORC6L	-0.1683595270145514	0.8450499617727686	["GO:0051302","GO:0044843","GO:0051301"]	["regulation of cell division","cell cycle G1/S phase transition","cell division"]	query	0.3333333333333333	1.5087507543753772E-4	2650.364648781664	1226.0	-3874.0
H__sapiens__1_-774821	H__sapiens__1_-774821	SCD	SCD	O00767	ENSP00000359380	6319	NP_005054	NM_005063	SCDOS	-0.13816895075245605	0.8709515313981402	["GO:1902653","GO:0001659","GO:0006631","GO:1902652","GO:0006695","GO:0071616","GO:0008203","GO:0006637","GO:0006066","GO:0006633","GO:0050810","GO:0072330","GO:0046394","GO:1902930","GO:0019216","GO:0016053","GO:0035384","GO:0044272","GO:0046890","GO:0072522","GO:0008202","GO:0046390","GO:0009152","GO:0031227","GO:1901293","GO:1990845","GO:0034032","GO:1901568","GO:0035383","GO:1901570","GO:0120…	["secondary alcohol biosynthetic process","temperature homeostasis","fatty acid metabolic process","secondary alcohol metabolic process","cholesterol biosynthetic process","acyl-CoA biosynthetic process","cholesterol metabolic process","acyl-CoA metabolic process","alcohol metabolic process","fatty acid biosynthetic process","regulation of steroid biosynthetic process","monocarboxylic acid biosyn…	query	0.3333333333333333	1.588057805304113E-4	3326.0500271997985	1696.0	-3874.0
H__sapiens__1_-777408	H__sapiens__1_-777408	AKT3	AKT3	Q9Y243	ENSP00000500597	10000	NP_859029	NM_181690	RAC-gamma	-0.12231861959845898	0.8848663878095513	["GO:0018209","GO:0043542","GO:0001935","GO:0001936","GO:0043535","GO:0101023","GO:0090342","GO:0050678","GO:0007569","GO:0043534","GO:0090398","GO:0050673","GO:0050679","GO:0010631","GO:0090049","GO:0043536","GO:0001525","GO:1905562","GO:0002042","GO:0010594","GO:0010634","GO:0001938","GO:0030335","GO:0007568","GO:0010632","GO:0002040","GO:0090344","GO:0010595","GO:2000772","GO:0090132","GO:0090…	["peptidyl-serine modification","endothelial cell migration","endothelial cell proliferation","regulation of endothelial cell proliferation","regulation of blood vessel endothelial cell migration","vascular endothelial cell proliferation","regulation of cell aging","regulation of epithelial cell proliferation","cell aging","blood vessel endothelial cell migration","cellular senescence","epithelia…	query	0.3333333333333333	1.5092061575611228E-4	1922.4298168538478	1349.0	-3874.0
H__sapiens__1_-779923	H__sapiens__1_-779923	WNT10A	WNT10A	Q9GZT5	ENSP00000388812	80326	NP_079492	NM_025216		-0.044702998381607593	0.9562814568008084	["GO:0098773","GO:0001664","GO:0042633","GO:0022405","GO:0022404","GO:0071559","GO:0048732","GO:0007423","GO:0001942"]	["skin epidermis development","G protein-coupled receptor binding","hair cycle","hair cycle process","molting cycle process","response to transforming growth factor beta","gland development","sensory organ development","hair follicle development"]	query	0.3333333333333333	1.4423770373575654E-4	952.7314707936297	911.0	-3874.0
H__sapiens__1_-778308	H__sapiens__1_-778308	H2BC11	HIST1H2BJ	P06899	ENSP00000476136	8970	NP_066402	NM_021058	HIST1H2BJ	-0.15777903954522898	0.854038469850124	["GO:0071356","GO:0010803","GO:0006959","GO:0042742","GO:0060759","GO:0001959","GO:0002251","GO:0001906","GO:0034612","GO:0002385","GO:0019730","GO:0033209"]	["cellular response to tumor necrosis factor","regulation of tumor necrosis factor-mediated signaling pathway","humoral immune response","defense response to bacterium","regulation of response to cytokine stimulus","regulation of cytokine-mediated signaling pathway","organ or tissue specific immune response","cell killing","response to tumor necrosis factor","mucosal immune response","antimicrobi…	query	0.3333333333333333	1.490757304710793E-4	1725.853611836008	1081.0	-3874.0
H__sapiens__1_-782157	H__sapiens__1_-782157	FER	FER	P16591	ENSP00000486048	2241	NP_005237	NM_005246	TYK3	-0.132877619327511	0.8755722386716845	["GO:0009898","GO:0097696","GO:0030832","GO:0043300","GO:0062197","GO:0030041","GO:0002279","GO:0002699","GO:0007173","GO:0018212","GO:0007259","GO:0008064","GO:0045576","GO:1901184","GO:0002703","GO:0110053","GO:1901653","GO:0004713","GO:0050900","GO:0006979","GO:1902743","GO:0034599","GO:0071375","GO:0002448","GO:0008286","GO:0000302","GO:0032418","GO:0060491","GO:0017157","GO:0046777","GO:0043…	["cytoplasmic side of plasma membrane","receptor signaling pathway via STAT","regulation of actin filament length","regulation of leukocyte degranulation","cellular response to chemical stress","actin filament polymerization","mast cell activation involved in immune response","positive regulation of immune effector process","epidermal growth factor receptor signaling pathway","peptidyl-tyrosine m…	query	0.3333333333333333	1.5820281601012498E-4	3307.595032818232	1775.0	-3874.0
H__sapiens__1_-774749	H__sapiens__1_-774749	CDC23	CDC23	Q9UJX2	ENSP00000423704	8697	NP_004652	NM_004661	CUT23	-0.19549201617003806	0.8224299096785255	["GO:0051785","GO:0045787","GO:0033045","GO:0140014","GO:0007091","GO:0031461","GO:0000209","GO:0000070","GO:0044784","GO:0007088","GO:0045840","GO:0051783","GO:1901989","GO:0051310","GO:0000151","GO:0090068","GO:1902101","GO:0033044","GO:0030071","GO:0051983","GO:0045931","GO:1902099","GO:1905820","GO:0051304","GO:0007059","GO:0051306","GO:0010965","GO:0000152","GO:1905818","GO:0043161","GO:0000…	["positive regulation of nuclear division","positive regulation of cell cycle","regulation of sister chromatid segregation","mitotic nuclear division","metaphase/anaphase transition of mitotic cell cycle","cullin-RING ubiquitin ligase complex","protein polyubiquitination","mitotic sister chromatid segregation","metaphase/anaphase transition of cell cycle","regulation of mitotic nuclear division",…	query	0.3333333333333333	1.4267370523612499E-4	848.2168831154557	922.0	-3874.0
H__sapiens__1_-781459	H__sapiens__1_-781459	CBR4	CBR4	Q8N4T8	ENSP00000427615	84869	NP_116172	NM_032783	SDR45C1	-0.198278218598136	0.8201416427349992	["GO:0006631","GO:1901568","GO:0035383","GO:1901570","GO:0071616","GO:0003955","GO:0009260","GO:0006637","GO:0033865","GO:0006066","GO:0016614","GO:0033875","GO:0034033","GO:0006164","GO:0016651","GO:0072330","GO:0046394","GO:0016053","GO:0034308","GO:0009165","GO:0035384","GO:0019748","GO:0044272","GO:0042180","GO:1901661","GO:0072522","GO:1902644","GO:0046390","GO:0009152","GO:0016137","GO:0035…	["fatty acid metabolic process","fatty acid derivative metabolic process","thioester metabolic process","fatty acid derivative biosynthetic process","acyl-CoA biosynthetic process","NAD(P)H dehydrogenase (quinone) activity","ribonucleotide biosynthetic process","acyl-CoA metabolic process","nucleoside bisphosphate metabolic process","alcohol metabolic process","oxidoreductase activity, acting on …	query	0.3333333333333333	1.4784151389710232E-4	1810.1373914386327	1095.0	-3874.0
H__sapiens__1_-830215	H__sapiens__1_-830215	CCL3L1	CCL3L1	ENSG00000277796	ENSP00000484704		NP_066286	NM_021006	SCYA3L1	-0.009246363886269225	0.9907962522869291	["GO:1990869","GO:0071621","GO:1990266","GO:0070372","GO:0070555","GO:0042379","GO:0072676","GO:0030595","GO:0050900","GO:0034341","GO:0005125","GO:0060326","GO:0043087","GO:0034612","GO:0097530","GO:0097529","GO:0001664","GO:1990868","GO:0071674","GO:0005126","GO:0070371"]	["cellular response to chemokine","granulocyte chemotaxis","neutrophil migration","regulation of ERK1 and ERK2 cascade","response to interleukin-1","chemokine receptor binding","lymphocyte migration","leukocyte chemotaxis","leukocyte migration","response to interferon-gamma","cytokine activity","cell chemotaxis","regulation of GTPase activity","response to tumor necrosis factor","granulocyte migr…	query	0.3333333333333333	1.299545159194282E-4	22.58023561997702	85.0	-3874.0
H__sapiens__1_-825151	H__sapiens__1_-825151	EGLN2	EGLN2	Q96KS0	ENSP00000472991	112398	NP_542770	NM_080732	PHD1	-0.06655323945323635	0.9356131030002934	["GO:0071453","GO:0043620","GO:0071456","GO:0030518","GO:0043618","GO:0005506","GO:0036294","GO:0009755","GO:0001666","GO:0030522","GO:0070482","GO:0051402","GO:0070997","GO:0043401","GO:0036293","GO:0016705","GO:1901214","GO:0071383","GO:0048545"]	["cellular response to oxygen levels","regulation of DNA-templated transcription in response to stress","cellular response to hypoxia","intracellular steroid hormone receptor signaling pathway","regulation of transcription from RNA polymerase II promoter in response to stress","iron ion binding","cellular response to decreased oxygen levels","hormone-mediated signaling pathway","response to hypox…	query	0.3333333333333333	1.5010507355148604E-4	2160.772181178964	1142.0	-3874.0
H__sapiens__1_-777556	H__sapiens__1_-777556	CNR1	CNR1	P21554	ENSP00000446819	1268	NP_149421	NM_033181	CNR	-0.12754632178509812	0.8802526400162012	["GO:0019935","GO:0007187","GO:0007188","GO:0019933","GO:0004930"]	["cyclic-nucleotide-mediated signaling","G protein-coupled receptor signaling pathway, coupled to cyclic nucleotide second messenger","adenylate cyclase-modulating G protein-coupled receptor signaling pathway","cAMP-mediated signaling","G protein-coupled receptor activity"]	query	0.3333333333333333	1.5218383807639628E-4	1843.7603969497734	1462.0	-3874.0
H__sapiens__1_-787451	H__sapiens__1_-787451	SHARPIN	SHARPIN	Q9H0F6	ENSP00000432355	81858	NP_112236	NM_030974	SIPL1	-0.15913065342770322	0.8528849193511564	["GO:0032182","GO:0071356","GO:0060759","GO:0001959","GO:0031348","GO:0034612","GO:0000209","GO:0033209","GO:0000151","GO:0007249","GO:0043122","GO:0050727","GO:0032102"]	["ubiquitin-like protein binding","cellular response to tumor necrosis factor","regulation of response to cytokine stimulus","regulation of cytokine-mediated signaling pathway","negative regulation of defense response","response to tumor necrosis factor","protein polyubiquitination","tumor necrosis factor-mediated signaling pathway","ubiquitin ligase complex","I-kappaB kinase/NF-kappaB signaling"…	query	0.3333333333333333	1.5190642564180464E-4	2230.798004875529	1224.0	-3874.0
H__sapiens__1_-778996	H__sapiens__1_-778996	PGLS	PGLS	O95336	ENSP00000472345	25796	NP_036220	NM_012088	6PGL	-0.1363582395432864	0.8725300017443867	["GO:0006740","GO:0006739","GO:0006098","GO:0051156","GO:0052689"]	["NADPH regeneration","NADP metabolic process","pentose-phosphate shunt","glucose 6-phosphate metabolic process","carboxylic ester hydrolase activity"]	query	0.3333333333333333	1.4413375612568464E-4	947.4629081496981	941.0	-3874.0
H__sapiens__1_-793037	H__sapiens__1_-793037	CRLF2	CRLF2	Q9HC73	ENSP00000485269	64109	NP_071431	NM_022148	TSLPR	-0.12282426346689833	0.8844190736465298	["GO:0097696","GO:0098761","GO:0032634","GO:1904892","GO:0002696","GO:0009986","GO:0033003","GO:0098760","GO:0140375","GO:0004896","GO:0050867","GO:0032674","GO:0005126","GO:0045576"]	["receptor signaling pathway via STAT","cellular response to interleukin-7","interleukin-5 production","regulation of receptor signaling pathway via STAT","positive regulation of leukocyte activation","cell surface","regulation of mast cell activation","response to interleukin-7","immune receptor activity","cytokine receptor activity","positive regulation of cell activation","regulation of interl…	query	0.3333333333333333	1.6406890894175554E-4	4015.657185989686	1694.0	-3874.0
H__sapiens__1_-774382	H__sapiens__1_-774382	HADHA	HADHA	P40939	ENSP00000496185	3030	NP_000173	NM_000182	MTPA	-0.1413375384520633	0.8681962126286498	["GO:0006631","GO:0044242","GO:0034440","GO:0046395","GO:0072329","GO:0016835","GO:0016042","GO:0016747","GO:0016836","GO:0016614","GO:0098798","GO:0030258","GO:0016746","GO:0032048","GO:0016829","GO:0046471","GO:0019395","GO:0016616","GO:0009062","GO:0016054"]	["fatty acid metabolic process","cellular lipid catabolic process","lipid oxidation","carboxylic acid catabolic process","monocarboxylic acid catabolic process","carbon-oxygen lyase activity","lipid catabolic process","transferase activity, transferring acyl groups other than amino-acyl groups","hydro-lyase activity","oxidoreductase activity, acting on CH-OH group of donors","mitochondrial protei…	query	0.3333333333333333	1.5037593984962405E-4	2074.994735163938	1364.0	-3874.0
H__sapiens__1_-775803	H__sapiens__1_-775803	NUMBL	NUMBL	Q9Y6R0	ENSP00000472400	9253	NP_004747	NM_004756	TNRC23	-0.06172402844240192	0.9401423035294907	["GO:0030900","GO:0017145","GO:0061351","GO:0051962","GO:0007420","GO:0050767","GO:0010720","GO:0007405","GO:0072089","GO:0051301","GO:0055057","GO:0051960"]	["forebrain development","stem cell division","neural precursor cell proliferation","positive regulation of nervous system development","brain development","regulation of neurogenesis","positive regulation of cell development","neuroblast proliferation","stem cell proliferation","cell division","neuroblast division","regulation of nervous system development"]	query	0.3333333333333333	1.4287755393627662E-4	1035.8489713473482	792.0	-3874.0
H__sapiens__1_-788787	H__sapiens__1_-788787	ZFP36L1	ZFP36L1	Q07352	ENSP00000452119	677	NP_004917	NM_004926	TIS11B	-0.12900518744927636	0.8789694059245481	["GO:0042113","GO:0045639","GO:0045930","GO:0062197","GO:0030217","GO:0030099","GO:1903708","GO:0050678","GO:0034612","GO:0006970","GO:0070482","GO:0045682","GO:0046683","GO:0002761","GO:0045604","GO:0045445","GO:0048017","GO:1904019","GO:0051591","GO:0048545","GO:0030224","GO:0070849","GO:0071453","GO:0045619","GO:1901653","GO:0007498","GO:1902105","GO:0048015","GO:0030183","GO:0030218","GO:0071…	["B cell activation","positive regulation of myeloid cell differentiation","negative regulation of mitotic cell cycle","cellular response to chemical stress","T cell differentiation","myeloid cell differentiation","positive regulation of hemopoiesis","regulation of epithelial cell proliferation","response to tumor necrosis factor","response to osmotic stress","response to oxygen levels","regulati…	query	0.3333333333333333	1.6002560409665546E-4	3169.245237276226	1805.0	-3874.0
H__sapiens__1_-784255	H__sapiens__1_-784255	DIRAS2	DIRAS2	Q96HU8	ENSP00000490853	54769	NP_060064	NM_017594	DKFZp761C07121	-0.11389840109266827	0.8923486129210341	["GO:0001883","GO:0019001","GO:0032549","GO:0032550","GO:0043405","GO:0032561","GO:0001882","GO:0071902"]	["purine nucleoside binding","guanyl nucleotide binding","ribonucleoside binding","purine ribonucleoside binding","regulation of MAP kinase activity","guanyl ribonucleotide binding","nucleoside binding","positive regulation of protein serine/threonine kinase activity"]	query	0.3333333333333333	1.5377518068583732E-4	2611.2561020698536	1427.0	-3874.0
H__sapiens__1_-784188	H__sapiens__1_-784188	RAD21	RAD21	O60216	ENSP00000430524	5885	NP_006256	NM_006265	SCC1	-0.20752436942736818	0.8125934390950148	["GO:0000070","GO:2001252","GO:0045787","GO:0140014","GO:0034399","GO:0000819","GO:0007059","GO:0090068","GO:0033044"]	["mitotic sister chromatid segregation","positive regulation of chromosome organization","positive regulation of cell cycle","mitotic nuclear division","nuclear periphery","sister chromatid segregation","chromosome segregation","positive regulation of cell cycle process","regulation of chromosome organization"]	query	0.3333333333333333	1.4943215780035862E-4	1807.3793785252626	1297.0	-3874.0
H__sapiens__1_-782911	H__sapiens__1_-782911	WIPI2	WIPI2	Q9Y4P8	ENSP00000429654	26100	NP_057087	NM_016003	FLJ42984	-0.12097485795767975	0.8860562365762281	["GO:0071496","GO:0042594","GO:0061726","GO:0031668","GO:0031669","GO:1901981","GO:0000045","GO:1902936","GO:0007033","GO:0031667","GO:1905037","GO:0035091","GO:0009991","GO:1903008","GO:0000407","GO:0016236"]	["cellular response to external stimulus","response to starvation","mitochondrion disassembly","cellular response to extracellular stimulus","cellular response to nutrient levels","phosphatidylinositol phosphate binding","autophagosome assembly","phosphatidylinositol bisphosphate binding","vacuole organization","response to nutrient levels","autophagosome organization","phosphatidylinositol bindi…	query	0.3333333333333333	1.426126640045636E-4	675.0115044023519	790.0	-3874.0
H__sapiens__1_-775264	H__sapiens__1_-775264	E2F1	E2F1	Q01094	ENSP00000345571	1869	NP_005216	NM_005225	RBBP3	-0.16654161097244916	0.8465875888696714	["GO:0097193","GO:0072422","GO:1902110","GO:1905710","GO:0045930","GO:0072413","GO:0048144","GO:0072331","GO:1905475","GO:0005667","GO:2000134","GO:0097345","GO:0051222","GO:0051205","GO:0035794","GO:1901030","GO:0007006","GO:1901028","GO:0045023","GO:0090575","GO:1902108","GO:1902400","GO:0090559","GO:0042770","GO:0000075","GO:0071156","GO:0044773","GO:0006839","GO:0033157","GO:0072655","GO:0007…	["intrinsic apoptotic signaling pathway","signal transduction involved in DNA damage checkpoint","positive regulation of mitochondrial membrane permeability involved in apoptotic process","positive regulation of membrane permeability","negative regulation of mitotic cell cycle","signal transduction involved in mitotic cell cycle checkpoint","fibroblast proliferation","signal transduction by p53 c…	query	0.3333333333333333	1.5172204521316947E-4	2361.2810495967838	1405.0	-3874.0
H__sapiens__1_-774574	H__sapiens__1_-774574	NOS1	NOS1	P29475	ENSP00000477999	4842	NP_001191147	NM_001204218	nNOS	-0.12008882216520302	0.8868416620221268	["GO:0006942","GO:0035296","GO:0051146","GO:1903522","GO:2000756","GO:0031056","GO:0006941","GO:1905269","GO:0045981","GO:0006837","GO:0051282","GO:0070588","GO:0060048","GO:0009065","GO:1901983","GO:0051209","GO:0051208","GO:0006525","GO:0043266","GO:0046906","GO:0030810","GO:0016597","GO:0003018","GO:0051349","GO:0090257","GO:0060047","GO:0006937","GO:0031406","GO:0006816","GO:0034704","GO:0051…	["regulation of striated muscle contraction","regulation of tube diameter","striated muscle cell differentiation","regulation of blood circulation","regulation of peptidyl-lysine acetylation","regulation of histone modification","striated muscle contraction","positive regulation of chromatin organization","positive regulation of nucleotide metabolic process","serotonin transport","regulation of s…	query	0.3333333333333333	1.4660606949127694E-4	1236.0877404949892	1100.0	-3874.0
H__sapiens__1_-785838	H__sapiens__1_-785838	LPAR3	LPAR3	Q9UBY5	ENSP00000395389	23566	NP_036284	NM_012152	RP4-678I3	-0.11400478587844803	0.8922536856545056	["GO:0019935","GO:0006874","GO:0007187","GO:0007188","GO:0019933","GO:0051480"]	["cyclic-nucleotide-mediated signaling","cellular calcium ion homeostasis","G protein-coupled receptor signaling pathway, coupled to cyclic nucleotide second messenger","adenylate cyclase-modulating G protein-coupled receptor signaling pathway","cAMP-mediated signaling","regulation of cytosolic calcium ion concentration"]	query	0.3333333333333333	1.565680288085173E-4	2566.375131489604	1585.0	-3874.0
H__sapiens__1_-780313	H__sapiens__1_-780313	CYP19A1	CYP19A1	P11511	ENSP00000479587	1588	NP_112503	NM_031226	P-450AROM	-0.1552452116986727	0.856205200208668	["GO:0004497","GO:0015850","GO:0006869","GO:0016042","GO:0032370","GO:0008209","GO:0007548","GO:1905952","GO:0048608","GO:0008406","GO:0006694","GO:0009914","GO:0046545","GO:0046887","GO:0046883","GO:1903532","GO:0046906","GO:1905954","GO:0046660","GO:0006706","GO:0032368","GO:0140353","GO:0042446","GO:0008202","GO:0034754","GO:0008210","GO:0016705","GO:0042445","GO:0120178","GO:0045137","GO:0046…	["monooxygenase activity","organic hydroxy compound transport","lipid transport","lipid catabolic process","positive regulation of lipid transport","androgen metabolic process","sex differentiation","regulation of lipid localization","reproductive structure development","gonad development","steroid biosynthetic process","hormone transport","development of primary female sexual characteristics","p…	query	0.3333333333333333	1.6103059581320451E-4	3986.9040525921223	1933.0	-3874.0
H__sapiens__1_-786855	H__sapiens__1_-786855	GNG7	GNG7	O60262	ENSP00000468650	2788	NP_443079	NM_052847	FLJ00058	-0.12573970164841494	0.8818443595443675	["GO:0019898","GO:0009898","GO:1905360","GO:0098562","GO:0031234","GO:0019897"]	["extrinsic component of membrane","cytoplasmic side of plasma membrane","GTPase complex","cytoplasmic side of membrane","extrinsic component of cytoplasmic side of plasma membrane","extrinsic component of plasma membrane"]	query	0.3333333333333333	1.5384615384615385E-4	2364.727372306319	1479.0	-3874.0
H__sapiens__1_-773255	H__sapiens__1_-773255	GABARAPL2	GABARAPL2	P60520	ENSP00000457448	11345	NP_009216	NM_007285	GEF2	-0.2038822071807331	0.8155584324565537	["GO:0071496","GO:0005776","GO:0061136","GO:0044389","GO:1903362","GO:0042594","GO:0061726","GO:0043562","GO:0031668","GO:0031669","GO:0031330","GO:0007033","GO:0043462","GO:0031667","GO:0045861","GO:1905037","GO:1903050","GO:0009991","GO:1903008","GO:0009267","GO:0009895","GO:0016236"]	["cellular response to external stimulus","autophagosome","regulation of proteasomal protein catabolic process","ubiquitin-like protein ligase binding","regulation of cellular protein catabolic process","response to starvation","mitochondrion disassembly","cellular response to nitrogen levels","cellular response to extracellular stimulus","cellular response to nutrient levels","negative regulatio…	query	0.3333333333333333	1.6160310277957336E-4	4143.630319005583	1693.0	-3874.0
H__sapiens__1_-787018	H__sapiens__1_-787018	CLDN22	CLDN22	Q8N7P3	ENSP00000318113	53842	NP_001104789	NM_001111319		-0.009882047159452505	0.9901666198268317	["GO:0120193","GO:0098742","GO:0045216","GO:0043297","GO:0070160","GO:0120192","GO:0005911","GO:0043296","GO:0007043"]	["tight junction organization","cell-cell adhesion via plasma-membrane adhesion molecules","cell-cell junction organization","apical junction assembly","tight junction","tight junction assembly","cell-cell junction","apical junction complex","cell-cell junction assembly"]	query	0.3333333333333333	1.3116474291710389E-4	77.67937271480416	155.0	-3874.0
H__sapiens__1_-774488	H__sapiens__1_-774488	DNM1L	DNM1L	O00429	ENSP00000450401	10059	NP_036193	NM_012063	VPS1	-0.18035443783601912	0.8349742125047529	["GO:0097193","GO:1990266","GO:0009306","GO:0090140","GO:0043065","GO:0007031","GO:0051222","GO:0002687","GO:0042579","GO:0000422","GO:2001233","GO:0070265","GO:0030335","GO:0030595","GO:0030593","GO:0002685","GO:0050900","GO:0050920","GO:0010821","GO:0002793","GO:0001836","GO:0031968","GO:0002791","GO:1903008","GO:0051047","GO:1904951","GO:0071622","GO:0044389","GO:0097300","GO:0061726","GO:0002…	["intrinsic apoptotic signaling pathway","neutrophil migration","protein secretion","regulation of mitochondrial fission","positive regulation of apoptotic process","peroxisome organization","positive regulation of protein transport","positive regulation of leukocyte migration","microbody","autophagy of mitochondrion","regulation of apoptotic signaling pathway","necrotic cell death","positive reg…	query	0.3333333333333333	1.505343971097396E-4	1995.6032514185424	1343.0	-3874.0
H__sapiens__1_-777522	H__sapiens__1_-777522	TREH	TREH	O43280	ENSP00000477923	11181	NP_009111	NM_007180	TREA	-0.157066073572349	0.8546475873328747	["GO:0044275","GO:0031225","GO:0009311","GO:0016052","GO:0044262","GO:0016798","GO:0004553"]	["cellular carbohydrate catabolic process","anchored component of membrane","oligosaccharide metabolic process","carbohydrate catabolic process","cellular carbohydrate metabolic process","hydrolase activity, acting on glycosyl bonds","hydrolase activity, hydrolyzing O-glycosyl compounds"]	query	0.3333333333333333	1.5693659761456373E-4	2760.7588989980854	1398.0	-3874.0
H__sapiens__1_-780403	H__sapiens__1_-780403	AOX1	AOX1	Q06278	ENSP00000413326	316	NP_001150	NM_001159	AOH1	-0.14217696755306625	0.8674677292602349	["GO:0006767","GO:0006766","GO:0016725","GO:0016903"]	["water-soluble vitamin metabolic process","vitamin metabolic process","oxidoreductase activity, acting on CH or CH2 groups","oxidoreductase activity, acting on the aldehyde or oxo group of donors"]	query	0.3333333333333333	1.5678896205707118E-4	2570.367660881919	1560.0	-3874.0
H__sapiens__1_-784971	H__sapiens__1_-784971	ATP5PD	ATP5H	O75947	ENSP00000437996	10476	NP_006347	NM_006356	ATPQ	-0.1532706542863841	0.8578974967516835	["GO:0009201","GO:0046034","GO:0009206","GO:0009260","GO:0007007","GO:0098800","GO:0015986","GO:0005743","GO:0016874","GO:0007006","GO:0009145","GO:1990542","GO:0015078","GO:0006164","GO:0045259","GO:0009142","GO:0009165","GO:0016469","GO:0015252","GO:0006839","GO:0009199","GO:1902600","GO:0072522","GO:0098798","GO:0046390","GO:0009152","GO:0009141","GO:0009144","GO:0009205","GO:0015985","GO:1901…	["ribonucleoside triphosphate biosynthetic process","ATP metabolic process","purine ribonucleoside triphosphate biosynthetic process","ribonucleotide biosynthetic process","inner mitochondrial membrane organization","inner mitochondrial membrane protein complex","ATP synthesis coupled proton transport","mitochondrial inner membrane","ligase activity","mitochondrial membrane organization","purine …	query	0.3333333333333333	1.4457134595923088E-4	1330.4255191416491	957.0	-3874.0
H__sapiens__1_-777732	H__sapiens__1_-777732	PPP1R3C	PPP1R3C	Q9UQK1	ENSP00000238994	5507	NP_005389	NM_005398	PTG	-0.1282531776704635	0.8796306481122143	["GO:0034637","GO:0070873","GO:0044042","GO:0019903","GO:0032881","GO:0030247","GO:0032885","GO:0043467","GO:0033692","GO:0008287","GO:1903293","GO:0004721","GO:0015980","GO:0030246","GO:0010906","GO:0019902","GO:0005978","GO:0000271","GO:0006109","GO:0005996","GO:0006112","GO:0016791","GO:0019318","GO:0043255","GO:0044264","GO:0016051","GO:0005977","GO:0010962","GO:0009250","GO:0006006","GO:0005…	["cellular carbohydrate biosynthetic process","regulation of glycogen metabolic process","glucan metabolic process","protein phosphatase binding","regulation of polysaccharide metabolic process","polysaccharide binding","regulation of polysaccharide biosynthetic process","regulation of generation of precursor metabolites and energy","cellular polysaccharide biosynthetic process","protein serine/t…	query	0.3333333333333333	1.576789656259855E-4	3070.016266407131	1639.0	-3874.0
H__sapiens__1_-773186	H__sapiens__1_-773186	HSD17B6	HSD17B6	O14756	ENSP00000452273	8630	NP_003716	NM_003725	SDR9C6	-0.14395316858030155	0.8659282997612856	["GO:0042180","GO:0016042","GO:0006706","GO:0008209","GO:0016614","GO:0042446","GO:0008202","GO:1901616","GO:0034754","GO:0042445","GO:0120178","GO:0006694","GO:0016229","GO:0033764","GO:0016616"]	["cellular ketone metabolic process","lipid catabolic process","steroid catabolic process","androgen metabolic process","oxidoreductase activity, acting on CH-OH group of donors","hormone biosynthetic process","steroid metabolic process","organic hydroxy compound catabolic process","cellular hormone metabolic process","hormone metabolic process","steroid hormone biosynthetic process","steroid bio…	query	0.3333333333333333	1.5552099533437013E-4	2708.5272641464435	1481.0	-3874.0
H__sapiens__1_-788480	H__sapiens__1_-788480	MAML2	MAML2	Q8IZL2	ENSP00000483371	84441	NP_115803	NM_032427	MAM3	-0.053159265754202094	0.9482289800518062	["GO:0045944","GO:0006352","GO:0008593","GO:0007219"]	["positive regulation of transcription by RNA polymerase II","DNA-templated transcription, initiation","regulation of Notch signaling pathway","Notch signaling pathway"]	query	0.3333333333333333	1.5422578655151142E-4	2592.3618056407445	1500.0	-3874.0
H__sapiens__1_-782722	H__sapiens__1_-782722	TSPAN7	TSPAN7	P41732	ENSP00000419321	7102	NP_004606	NM_004615	TM4SF2	-0.202271178055652	0.8168733797692532			query	0.3333333333333333	1.733102253032929E-4	6436.301402696314	2197.0	-3874.0
H__sapiens__1_-778084	H__sapiens__1_-778084	CDKN2C	CDKN2C	P42773	ENSP00000379452	1031	NP_523240	NM_078626	INK4C	-0.16712230015598636	0.8460961273209108	["GO:1901991","GO:0000082","GO:1904029","GO:0045930","GO:0016538","GO:0044843","GO:0019887","GO:0019207","GO:1901988","GO:1902806","GO:0004860","GO:0030291","GO:2000045","GO:0019210","GO:0045926","GO:1902807","GO:0004857","GO:0001558"]	["negative regulation of mitotic cell cycle phase transition","G1/S transition of mitotic cell cycle","regulation of cyclin-dependent protein kinase activity","negative regulation of mitotic cell cycle","cyclin-dependent protein serine/threonine kinase regulator activity","cell cycle G1/S phase transition","protein kinase regulator activity","kinase regulator activity","negative regulation of cel…	query	0.3333333333333333	1.5216068167985393E-4	2218.248540086463	1260.0	-3874.0
H__sapiens__1_-787873	H__sapiens__1_-787873	SLC2A4	SLC2A4	P14672	ENSP00000500807	6517	NP_001033	NM_001042	GLUT4	-0.15783497187295048	0.8539907028264144	["GO:0015149","GO:0010232","GO:0046323","GO:0008643","GO:0003018","GO:0051119","GO:1901653","GO:1904659","GO:0015144","GO:0034219","GO:0009986","GO:0008645","GO:0032869","GO:0071375","GO:0050890","GO:0043434","GO:0007611","GO:0032868","GO:0015145","GO:0015749","GO:0007613","GO:0030135","GO:0033500","GO:0007610"]	["hexose transmembrane transporter activity","vascular transport","glucose import","carbohydrate transport","vascular process in circulatory system","sugar transmembrane transporter activity","cellular response to peptide","glucose transmembrane transport","carbohydrate transmembrane transporter activity","carbohydrate transmembrane transport","cell surface","hexose transmembrane transport","cell…	query	0.3333333333333333	1.6046213093709883E-4	4164.045024366708	1727.0	-3874.0
H__sapiens__1_-774552	H__sapiens__1_-774552	ANAPC5	ANAPC5	Q9UJX4	ENSP00000445191	51433	NP_057321	NM_016237	APC5	-0.1345074001325591	0.8741464100533266	["GO:0051785","GO:0045787","GO:0033045","GO:0140014","GO:0007091","GO:0031461","GO:0000209","GO:0000070","GO:0019902","GO:0044784","GO:0007088","GO:0045840","GO:0051783","GO:1901989","GO:0000151","GO:0090068","GO:1902101","GO:0033044","GO:0030071","GO:0051983","GO:0045931","GO:1902099","GO:1905820","GO:0051304","GO:0007059","GO:0051306","GO:0010965","GO:0000152","GO:1905818","GO:0043161","GO:0000…	["positive regulation of nuclear division","positive regulation of cell cycle","regulation of sister chromatid segregation","mitotic nuclear division","metaphase/anaphase transition of mitotic cell cycle","cullin-RING ubiquitin ligase complex","protein polyubiquitination","mitotic sister chromatid segregation","phosphatase binding","metaphase/anaphase transition of cell cycle","regulation of mito…	query	0.3333333333333333	1.4310246136233542E-4	916.4099238351596	953.0	-3874.0
H__sapiens__1_-783089	H__sapiens__1_-783089	ADPGK	ADPGK	Q9BRR6	ENSP00000458102	83440	NP_112574	NM_031284	DKFZp434B195	-0.1540518853220594	0.8572275423304601	["GO:0046939","GO:0006734","GO:0009132","GO:0019674","GO:0061620","GO:0046034","GO:0019318","GO:0019320","GO:0009179","GO:0006757","GO:0009185","GO:0006096","GO:0006007","GO:0006090","GO:0006735","GO:0006006","GO:0061718","GO:0005996","GO:0009135","GO:0046031","GO:0016052","GO:0046365","GO:0061615","GO:0006165"]	["nucleotide phosphorylation","NADH metabolic process","nucleoside diphosphate metabolic process","NAD metabolic process","glycolytic process through glucose-6-phosphate","ATP metabolic process","hexose metabolic process","hexose catabolic process","purine ribonucleoside diphosphate metabolic process","ATP generation from ADP","ribonucleoside diphosphate metabolic process","glycolytic process","g…	query	0.3333333333333333	1.591849729385546E-4	3357.1193964252134	1599.0	-3874.0
H__sapiens__1_-776919	H__sapiens__1_-776919	CCNG1	CCNG1	P51959	ENSP00000427086	900	NP_954854	NM_199246	CCNG	-0.22795476848541946	0.796160270555924	["GO:0061695","GO:1904029","GO:1902554","GO:1902911","GO:0019887","GO:0019207"]	["transferase complex, transferring phosphorus-containing groups","regulation of cyclin-dependent protein kinase activity","serine/threonine protein kinase complex","protein kinase complex","protein kinase regulator activity","kinase regulator activity"]	query	0.3333333333333333	1.6168148746968473E-4	4092.5769389927127	1746.0	-3874.0
H__sapiens__1_-783993	H__sapiens__1_-783993	PITX2	PITX2	Q99697	ENSP00000495061	5308	NP_700476	NM_153427	RIEG1	-0.1787737386699564	0.8362950992333865	["GO:0021536","GO:0035270","GO:0061323","GO:0060173","GO:0001501","GO:0035051","GO:0060348","GO:0061629","GO:0001654","GO:0007420","GO:0009855","GO:0003002","GO:0007423","GO:0009799","GO:0043010","GO:0033613","GO:0009798","GO:0003151","GO:0007507","GO:0048863","GO:0003007","GO:0030900","GO:0150063","GO:0048880","GO:0007389","GO:0048592","GO:0060485","GO:0048762","GO:0090596","GO:0048736","GO:0048…	["diencephalon development","endocrine system development","cell proliferation involved in heart morphogenesis","limb development","skeletal system development","cardiocyte differentiation","bone development","RNA polymerase II-specific DNA-binding transcription factor binding","eye development","brain development","determination of bilateral symmetry","regionalization","sensory organ development…	query	0.3333333333333333	1.5875535799333228E-4	3484.770529503454	1562.0	-3874.0
H__sapiens__1_-784432	H__sapiens__1_-784432	FUNDC2	FUNDC2	Q9BWH2	ENSP00000395488	65991	NP_076423	NM_023934	HCBP6	-0.06412551202839344	0.9378872760086088	["GO:0019867","GO:0031968","GO:0061726","GO:1903008","GO:0031306"]	["outer membrane","organelle outer membrane","mitochondrion disassembly","organelle disassembly","intrinsic component of mitochondrial outer membrane"]	query	0.3333333333333333	1.371553970648745E-4	337.6315997856975	475.0	-3874.0
H__sapiens__1_-777540	H__sapiens__1_-777540	CREB1	CREB1	P16220	ENSP00000412016	1385	NP_604391	NM_134442		-0.18877944745353156	0.8279690972513833	["GO:0033613","GO:0045834","GO:0046890","GO:0031647","GO:0045444","GO:0048511","GO:0000978","GO:0032526","GO:0005667","GO:0043434","GO:0061629","GO:0045598","GO:0090575","GO:0019216"]	["activating transcription factor binding","positive regulation of lipid metabolic process","regulation of lipid biosynthetic process","regulation of protein stability","fat cell differentiation","rhythmic process","RNA polymerase II cis-regulatory region sequence-specific DNA binding","response to retinoic acid","transcription regulator complex","response to peptide hormone","RNA polymerase II-s…	query	0.3333333333333333	1.4760147601476016E-4	1458.6277969366336	1270.0	-3874.0
H__sapiens__1_-777609	H__sapiens__1_-777609	CCND2	CCND2	P30279	ENSP00000502654	894	NP_001750	NM_001759		-0.15970697996145086	0.8523935207585265	["GO:0000082","GO:1904029","GO:0045787","GO:0044843","GO:0045931","GO:0019887","GO:0019207","GO:1902806","GO:2000045","GO:0061695","GO:0000079","GO:1902554","GO:1902911","GO:1904031","GO:1901989","GO:0071902","GO:0090068","GO:1902808","GO:1901992"]	["G1/S transition of mitotic cell cycle","regulation of cyclin-dependent protein kinase activity","positive regulation of cell cycle","cell cycle G1/S phase transition","positive regulation of mitotic cell cycle","protein kinase regulator activity","kinase regulator activity","regulation of cell cycle G1/S phase transition","regulation of G1/S transition of mitotic cell cycle","transferase comple…	query	0.3333333333333333	1.5997440409534473E-4	3219.877016380061	1800.0	-3874.0
H__sapiens__1_-775939	H__sapiens__1_-775939	RASA4	RASA4	O43374	ENSP00000478719	10156	NP_008920	NM_006989	KIAA0538	-0.01155643426532614	0.9885100848333619	["GO:0051592","GO:0071248","GO:0071241","GO:0010038","GO:0043087","GO:0051346"]	["response to calcium ion","cellular response to metal ion","cellular response to inorganic substance","response to metal ion","regulation of GTPase activity","negative regulation of hydrolase activity"]	query	0.3333333333333333	1.3073604392731077E-4	42.47886621018421	129.0	-3874.0
H__sapiens__1_-777864	H__sapiens__1_-777864	EPHX2	EPHX2	P34913	ENSP00000430779	2053	NP_001970	NM_001979	ABHD20	-0.18685743017247827	0.8295619984659413	["GO:0006631","GO:1901568","GO:1902652","GO:0001676","GO:0008203","GO:0005777","GO:0120254","GO:0072662","GO:0055088","GO:0006066","GO:0007031","GO:0030258","GO:0006633","GO:0006690","GO:0042579","GO:0072330","GO:0019218","GO:0043574","GO:0046394","GO:0019216","GO:0016053","GO:0031907","GO:0016791","GO:0055092","GO:0019369","GO:0008202","GO:0016125","GO:0033559","GO:0072663","GO:0018904"]	["fatty acid metabolic process","fatty acid derivative metabolic process","secondary alcohol metabolic process","long-chain fatty acid metabolic process","cholesterol metabolic process","peroxisome","olefinic compound metabolic process","protein localization to peroxisome","lipid homeostasis","alcohol metabolic process","peroxisome organization","lipid modification","fatty acid biosynthetic proce…	query	0.3333333333333333	1.6431153466973383E-4	5329.430248644031	1807.0	-3874.0
H__sapiens__1_-775100	H__sapiens__1_-775100	ITPK1	ITPK1	Q13572	ENSP00000486991	3705	NP_055031	NM_014216		-0.11375943798680861	0.8924726250721524	["GO:0019751","GO:0097300","GO:0070265","GO:0007599","GO:0044262","GO:0050817","GO:0006066"]	["polyol metabolic process","programmed necrotic cell death","necrotic cell death","hemostasis","cellular carbohydrate metabolic process","coagulation","alcohol metabolic process"]	query	0.3333333333333333	1.4814814814814815E-4	1268.719958847322	1058.0	-3874.0
H__sapiens__1_-773109	H__sapiens__1_-773109	IL20RA	IL20RA	Q9UHF4	ENSP00000489419	53832	NP_055247	NM_014432	ZCYTOR7	-0.11079181346393756	0.8951250825225583	["GO:0019955","GO:0140375"]	["cytokine binding","immune receptor activity"]	query	0.3333333333333333	1.4983518130056938E-4	1789.8735274647884	1186.0	-3874.0
H__sapiens__1_-792612	H__sapiens__1_-792612	HSPA1B	HSPA1B	P0DMV9	ENSP00000442789	3304	NP_005337	NM_005346	HSP70-2	-0.019929549960888634	0.9802677307741487	["GO:0034605","GO:0035966","GO:0045639","GO:0062197","GO:0140014","GO:0030099","GO:0034612","GO:0031396","GO:2001234","GO:0016234","GO:2000058","GO:1903320","GO:2001236","GO:0045732","GO:2001233","GO:1901800","GO:0009408","GO:2001237","GO:0035967","GO:0071356","GO:0101002","GO:1903321","GO:1903362","GO:2000060","GO:0070507","GO:0006986","GO:0006979","GO:0030218","GO:0045862","GO:0048872","GO:0038…	["cellular response to heat","response to topologically incorrect protein","positive regulation of myeloid cell differentiation","cellular response to chemical stress","mitotic nuclear division","myeloid cell differentiation","response to tumor necrosis factor","regulation of protein ubiquitination","negative regulation of apoptotic signaling pathway","inclusion body","regulation of ubiquitin-dep…	query	0.3333333333333333	1.3054830287206266E-4	22.585106057524836	117.0	-3874.0
H__sapiens__1_-780480	H__sapiens__1_-780480	CXCL9	CXCL9	Q07325	ENSP00000354901	4283	NP_002407	NM_002416	SCYB9	-0.16975322459646347	0.8438730380128542	["GO:0010524","GO:1990869","GO:1990266","GO:0006959","GO:0051282","GO:0007188","GO:0070588","GO:0034767","GO:0051209","GO:0051208","GO:0051928","GO:0034764","GO:0060402","GO:1904427","GO:0030595","GO:0043270","GO:0050900","GO:0071216","GO:0005125","GO:0051279","GO:0006816","GO:0051235","GO:0051651","GO:1990868","GO:0010522","GO:1903169","GO:1904062","GO:0097553","GO:0007204","GO:0097530","GO:0019…	["positive regulation of calcium ion transport into cytosol","cellular response to chemokine","neutrophil migration","humoral immune response","regulation of sequestering of calcium ion","adenylate cyclase-modulating G protein-coupled receptor signaling pathway","calcium ion transmembrane transport","positive regulation of ion transmembrane transport","release of sequestered calcium ion into cyto…	query	0.3333333333333333	1.6196954972465177E-4	4372.154315654635	1871.0	-3874.0
H__sapiens__1_-788119	H__sapiens__1_-788119	EWSR1	EWSR1	Q01844	ENSP00000486709	2130	NP_053733	NM_013986	EWS	-0.16893288463524736	0.8445655848111979			query	0.3333333333333333	1.4518002322880372E-4	1055.651132644708	990.0	-3874.0
H__sapiens__1_-774807	H__sapiens__1_-774807	ITPR3	ITPR3	Q14573	ENSP00000475177	3710	NP_002215	NM_002224	IP3R3	-0.14418990536394163	0.8657233269439972	["GO:0009306","GO:1903522","GO:0043178","GO:0008016","GO:0051282","GO:0010038","GO:0097553","GO:0007204","GO:0070588","GO:0005262","GO:0061337","GO:0072509","GO:0051208","GO:0031965","GO:0009914","GO:0016528","GO:0050708","GO:0099604","GO:0007596","GO:0046883","GO:0050817","GO:0030073","GO:0060401","GO:0030072","GO:0060402","GO:0006874","GO:0035637","GO:0060047","GO:0015278","GO:0051480","GO:0005…	["protein secretion","regulation of blood circulation","alcohol binding","regulation of heart contraction","regulation of sequestering of calcium ion","response to metal ion","calcium ion transmembrane import into cytosol","positive regulation of cytosolic calcium ion concentration","calcium ion transmembrane transport","calcium channel activity","cardiac conduction","divalent inorganic cation tr…	query	0.3333333333333333	1.5248551387618176E-4	2343.0195954459646	1323.0	-3874.0
H__sapiens__1_-790555	H__sapiens__1_-790555	RYR2	RYR2	Q92736	ENSP00000499787	6262	NP_001026	NM_001035	VTSIP	-0.14773798688897458	0.8626571128074255	["GO:0006942","GO:0003205","GO:1903522","GO:0071868","GO:0006941","GO:0051282","GO:0010038","GO:0070588","GO:0086003","GO:0051018","GO:0014706","GO:0060048","GO:0032411","GO:0001508","GO:0051209","GO:0051208","GO:0051928","GO:1904019","GO:0071870","GO:1904427","GO:0090257","GO:0060047","GO:0003007","GO:0006937","GO:0005217","GO:0006816","GO:0031674","GO:0051235","GO:0086019","GO:0051651","GO:0043…	["regulation of striated muscle contraction","cardiac chamber development","regulation of blood circulation","cellular response to monoamine stimulus","striated muscle contraction","regulation of sequestering of calcium ion","response to metal ion","calcium ion transmembrane transport","cardiac muscle cell contraction","protein kinase A binding","striated muscle tissue development","cardiac muscl…	query	0.3333333333333333	1.5728216420257942E-4	2913.825325151432	1655.0	-3874.0
H__sapiens__1_-776827	H__sapiens__1_-776827	TFEB	TFEB	P19484	ENSP00000415946	7942	NP_009093	NM_007162	TCFEB	-0.1336046519228991	0.8749359004618928	["GO:0048568","GO:0071496","GO:0043009","GO:0042594","GO:0031668","GO:0001701","GO:0031669","GO:0048608","GO:0001890","GO:0080171","GO:0007033","GO:0031667","GO:0010506","GO:0009991","GO:0009792","GO:1990928","GO:0009267","GO:0061458"]	["embryonic organ development","cellular response to external stimulus","chordate embryonic development","response to starvation","cellular response to extracellular stimulus","in utero embryonic development","cellular response to nutrient levels","reproductive structure development","placenta development","lytic vacuole organization","vacuole organization","response to nutrient levels","regulati…	query	0.3333333333333333	1.5705983979896342E-4	2783.6791888731555	1413.0	-3874.0
H__sapiens__1_-773769	H__sapiens__1_-773769	HYAL2	HYAL2	Q12891	ENSP00000414656	8692	NP_149348	NM_033158	LUCA2	-0.17944587898975992	0.8357331804432303	["GO:0009416","GO:0043405","GO:0034612","GO:0009411","GO:0043065","GO:0072001","GO:0019955","GO:0042306","GO:1900180","GO:0006026","GO:1901136","GO:0045177","GO:0051701","GO:1900182","GO:1904589","GO:0040013","GO:0006469","GO:0033157","GO:0006979","GO:0009986","GO:0006606","GO:0031406","GO:0019210","GO:0045926","GO:0071214","GO:0032675","GO:0001558","GO:0019901","GO:0016054","GO:0005539","GO:1904…	["response to light stimulus","regulation of MAP kinase activity","response to tumor necrosis factor","response to UV","positive regulation of apoptotic process","renal system development","cytokine binding","regulation of protein import into nucleus","regulation of protein localization to nucleus","aminoglycan catabolic process","carbohydrate derivative catabolic process","apical part of cell","…	query	0.3333333333333333	1.6680567139282736E-4	5448.19293156175	1848.0	-3874.0
H__sapiens__1_-777272	H__sapiens__1_-777272	ATP6V1B1	ATP6V1B1	P15313	ENSP00000408361	525	NP_001683	NM_001692	RTA1B	-0.16338798657768436	0.8492616223747007	["GO:0048568","GO:0030641","GO:0055067","GO:0045851","GO:0030004","GO:0051453","GO:0006826","GO:0043434","GO:0006885","GO:0098858","GO:0043583","GO:0007423","GO:0045177","GO:0048562","GO:0051452","GO:1901653","GO:0016469","GO:0000041","GO:0033176","GO:0032869","GO:0071375","GO:0032868","GO:0048598","GO:0090382","GO:0090596","GO:0010506","GO:0016236"]	["embryonic organ development","regulation of cellular pH","monovalent inorganic cation homeostasis","pH reduction","cellular monovalent inorganic cation homeostasis","regulation of intracellular pH","iron ion transport","response to peptide hormone","regulation of pH","actin-based cell projection","ear development","sensory organ development","apical part of cell","embryonic organ morphogenesis"…	query	0.3333333333333333	1.5048908954100828E-4	1659.0534357993874	1178.0	-3874.0
H__sapiens__1_-775065	H__sapiens__1_-775065	AP4S1	AP4S1	Q9Y587	ENSP00000500890	11154	NP_009008	NM_007077	SPG52	-0.12096186485492354	0.8860677492707504	["GO:0005802","GO:0030119"]	["trans-Golgi network","AP-type membrane coat adaptor complex"]	query	0.3333333333333333	1.486104919007282E-4	1845.64272352577	1187.0	-3874.0
H__sapiens__1_-780355	H__sapiens__1_-780355	ABCG5	ABCG5	Q9H222	ENSP00000384513	64240	NP_071881	NM_022436	STSL	-0.11927807050110886	0.8875609619227942	["GO:0030301","GO:0015850","GO:0022804","GO:0015399","GO:0060457","GO:0006869","GO:0044241","GO:0005319","GO:1990351","GO:0055088","GO:0015248","GO:1905952","GO:0007586","GO:0032371","GO:0098856","GO:0032372","GO:0120015","GO:1905953","GO:0045177","GO:0098533","GO:0032369","GO:0055092","GO:0015918","GO:0022600","GO:0032368","GO:0050892","GO:0032374","GO:1902495","GO:0044058"]	["cholesterol transport","organic hydroxy compound transport","active transmembrane transporter activity","primary active transmembrane transporter activity","negative regulation of digestive system process","lipid transport","lipid digestion","lipid transporter activity","transporter complex","lipid homeostasis","sterol transporter activity","regulation of lipid localization","digestion","regula…	query	0.3333333333333333	1.57035175879397E-4	2984.355810504061	1500.0	-3874.0
H__sapiens__1_-776400	H__sapiens__1_-776400	PF4V1	PF4V1	P10720	ENSP00000226524	5197	NP_002611	NM_002620	SCYB4V1	-0.13628822545787334	0.8725910932730631	["GO:1990869","GO:0071621","GO:1990266","GO:0006959","GO:0042379","GO:0030595","GO:0050900","GO:0071216","GO:0005125","GO:0060326","GO:0097530","GO:0019730","GO:0097529","GO:0001664","GO:0071219","GO:0032496","GO:0002237","GO:1990868","GO:0005126"]	["cellular response to chemokine","granulocyte chemotaxis","neutrophil migration","humoral immune response","chemokine receptor binding","leukocyte chemotaxis","leukocyte migration","cellular response to biotic stimulus","cytokine activity","cell chemotaxis","granulocyte migration","antimicrobial humoral response","myeloid leukocyte migration","G protein-coupled receptor binding","cellular respon…	query	0.3333333333333333	1.5620118712902218E-4	3218.2407258101266	1501.0	-3874.0
H__sapiens__1_-774017	H__sapiens__1_-774017	ENO1	ENO1	P06733	ENSP00000496562	2023	NP_001419	NM_001428	PPH	-0.14119199274809777	0.8683225840537829	["GO:0097193","GO:1903578","GO:0009132","GO:0044088","GO:0009201","GO:0045981","GO:0061620","GO:0071456","GO:0009206","GO:0048284","GO:0016836","GO:0030808","GO:2001234","GO:0010954","GO:0016485","GO:0070482","GO:0005996","GO:0009145","GO:0009135","GO:2001233","GO:0010755","GO:0030810","GO:0009142","GO:0006140","GO:0046364","GO:0071453","GO:0019674","GO:0016835","GO:0090257","GO:0019318","GO:2001…	["intrinsic apoptotic signaling pathway","regulation of ATP metabolic process","nucleoside diphosphate metabolic process","regulation of vacuole organization","ribonucleoside triphosphate biosynthetic process","positive regulation of nucleotide metabolic process","glycolytic process through glucose-6-phosphate","cellular response to hypoxia","purine ribonucleoside triphosphate biosynthetic proces…	query	0.3333333333333333	1.5080681646810435E-4	3870.8596595422655	1346.0	-3874.0
H__sapiens__1_-775642	H__sapiens__1_-775642	NBN	NBN	O60934	ENSP00000484487	4683	NP_002476	NM_002485	NBS	-0.13764430939561031	0.8714085884763589	["GO:1901991","GO:2001252","GO:0010972","GO:1904353","GO:0045930","GO:0000781","GO:0072331","GO:0044839","GO:0032392","GO:0016234","GO:0044818","GO:0042770","GO:0000075","GO:0033044","GO:0044773","GO:1902750","GO:0031570","GO:0000086","GO:0031572","GO:1902749","GO:1901988","GO:0007093","GO:0010639","GO:0090734","GO:0044774","GO:0051054","GO:0010389","GO:0031952","GO:0000077","GO:0046777","GO:0016…	["negative regulation of mitotic cell cycle phase transition","positive regulation of chromosome organization","negative regulation of G2/M transition of mitotic cell cycle","regulation of telomere capping","negative regulation of mitotic cell cycle","chromosome, telomeric region","signal transduction by p53 class mediator","cell cycle G2/M phase transition","DNA geometric change","inclusion body…	query	0.3333333333333333	1.432870038687491E-4	761.1290455828293	854.0	-3874.0
H__sapiens__1_-774995	H__sapiens__1_-774995	MCM5	MCM5	P33992	ENSP00000412847	4174	NP_006730	NM_006739	CDC46	-0.21161197209711913	0.8092786593506283	["GO:0000781","GO:0044843","GO:0031261"]	["chromosome, telomeric region","cell cycle G1/S phase transition","DNA replication preinitiation complex"]	query	0.3333333333333333	1.5114873035066505E-4	1969.3588679609047	1336.0	-3874.0
H__sapiens__1_-790261	H__sapiens__1_-790261	PARVA	PARVA	Q9NVD7	ENSP00000435860	55742	NP_060692	NM_018222	MXRA2	-0.13503326709957883	0.873686846177262	["GO:0003205","GO:0003151","GO:0007507","GO:0014812","GO:0031647","GO:0019887","GO:0019207","GO:0003007","GO:0030048","GO:0060326","GO:0003206","GO:0014909","GO:0019210","GO:0003279","GO:0031589","GO:0004857","GO:0001525","GO:0060411"]	["cardiac chamber development","outflow tract morphogenesis","heart development","muscle cell migration","regulation of protein stability","protein kinase regulator activity","kinase regulator activity","heart morphogenesis","actin filament-based movement","cell chemotaxis","cardiac chamber morphogenesis","smooth muscle cell migration","kinase inhibitor activity","cardiac septum development","cel…	query	0.3333333333333333	1.520912547528517E-4	2157.720781513085	1488.0	-3874.0
H__sapiens__1_-778683	H__sapiens__1_-778683	PKMYT1	PKMYT1	Q99640	ENSP00000461628	9088	NP_872629	NM_182687	PPP1R126	-0.19595119243723763	0.8220523560710278	["GO:1904029","GO:0051783","GO:0140014","GO:0044839","GO:0051346","GO:0035303"]	["regulation of cyclin-dependent protein kinase activity","regulation of nuclear division","mitotic nuclear division","cell cycle G2/M phase transition","negative regulation of hydrolase activity","regulation of dephosphorylation"]	query	0.3333333333333333	1.6398819285011479E-4	4783.869165876373	1784.0	-3874.0
H__sapiens__1_-781094	H__sapiens__1_-781094	MGST3	MGST3	O14880	ENSP00000487151	4259	NP_004519	NM_004528	GST-III	-0.14742752077941262	0.8629249801848444	["GO:1901568","GO:1901570","GO:0044272","GO:0016846","GO:0009410","GO:1901685","GO:0016765","GO:0016209","GO:0046456","GO:0004601","GO:0016829","GO:0006690","GO:0016684","GO:0071466","GO:0046394","GO:0016053","GO:0006691"]	["fatty acid derivative metabolic process","fatty acid derivative biosynthetic process","sulfur compound biosynthetic process","carbon-sulfur lyase activity","response to xenobiotic stimulus","glutathione derivative metabolic process","transferase activity, transferring alkyl or aryl (other than methyl) groups","antioxidant activity","icosanoid biosynthetic process","peroxidase activity","lyase a…	query	0.3333333333333333	1.5320974413972729E-4	2310.040373310392	1328.0	-3874.0
H__sapiens__1_-773271	H__sapiens__1_-773271	CYP46A1	CYP46A1	Q9Y6A2	ENSP00000452151	10858	NP_006659	NM_006668	CYP46	-0.15067064777263342	0.8601309380541574	["GO:1902652","GO:0004497","GO:0008203","GO:0016042","GO:0009410","GO:0120254","GO:0008206","GO:0006066","GO:0006694","GO:0046164","GO:0072330","GO:0046906","GO:0046394","GO:0016053","GO:1901617","GO:0060291","GO:0042180","GO:0006706","GO:0008202","GO:1901616","GO:0034754","GO:0016125","GO:0050806","GO:0050804","GO:0016705","GO:0042445","GO:0008207","GO:0016709","GO:0071466","GO:0099177","GO:0048…	["secondary alcohol metabolic process","monooxygenase activity","cholesterol metabolic process","lipid catabolic process","response to xenobiotic stimulus","olefinic compound metabolic process","bile acid metabolic process","alcohol metabolic process","steroid biosynthetic process","alcohol catabolic process","monocarboxylic acid biosynthetic process","tetrapyrrole binding","carboxylic acid biosy…	query	0.3333333333333333	1.5800284405119292E-4	3111.225388093777	1531.0	-3874.0
H__sapiens__1_-811321	H__sapiens__1_-811321	IL10RB	IL10RB	Q08334	ENSP00000489965	3588	NP_000619	NM_000628	IL-10R2	-0.18977772690162734	0.8271429651418997	["GO:0005887","GO:0097696","GO:0140375","GO:0004896","GO:0043235","GO:1904894","GO:0046425","GO:1904892","GO:0007259","GO:0098802"]	["integral component of plasma membrane","receptor signaling pathway via STAT","immune receptor activity","cytokine receptor activity","receptor complex","positive regulation of receptor signaling pathway via STAT","regulation of receptor signaling pathway via JAK-STAT","regulation of receptor signaling pathway via STAT","receptor signaling pathway via JAK-STAT","plasma membrane signaling recepto…	query	0.3333333333333333	1.6960651289009497E-4	5955.440167086573	2196.0	-3874.0
H__sapiens__1_-781788	H__sapiens__1_-781788	CDKN2A	CDKN2A	Q8N726	ENSP00000468510	1029	NP_478104	NM_058197	p19Arf	-0.15278970531419073	0.858310200907858	["GO:0090343","GO:0045930","GO:0090342","GO:0007569","GO:0043065","GO:0006925","GO:0010660","GO:0061629","GO:0000079","GO:0090398","GO:0071901","GO:0001933","GO:0071887","GO:0010657","GO:1904029","GO:0034390","GO:0033673","GO:0006469","GO:0007568","GO:0043433","GO:0019887","GO:0019207","GO:0019210","GO:0045926","GO:2000772","GO:1902807","GO:0033028","GO:2000108","GO:0004857","GO:2000106","GO:0001…	["positive regulation of cell aging","negative regulation of mitotic cell cycle","regulation of cell aging","cell aging","positive regulation of apoptotic process","inflammatory cell apoptotic process","regulation of muscle cell apoptotic process","RNA polymerase II-specific DNA-binding transcription factor binding","regulation of cyclin-dependent protein serine/threonine kinase activity","cellul…	query	0.3333333333333333	1.5114873035066505E-4	1926.950843885012	1306.0	-3874.0
H__sapiens__1_-782834	H__sapiens__1_-782834	FZD1	FZD1	Q9UP38	ENSP00000287934	8321	NP_003496	NM_003505	DKFZp564G072	-0.1298706797241792	0.8782089938067186	["GO:0007416","GO:0031346","GO:0001736","GO:0050808","GO:0001649","GO:0099172","GO:0048863","GO:0001503","GO:1904948","GO:0021953","GO:0010975","GO:0001664","GO:0001738","GO:0007420","GO:0060070","GO:0090175","GO:0035567","GO:0007164","GO:2000027","GO:0030901","GO:0071542"]	["synapse assembly","positive regulation of cell projection organization","establishment of planar polarity","synapse organization","osteoblast differentiation","presynapse organization","stem cell differentiation","ossification","midbrain dopaminergic neuron differentiation","central nervous system neuron differentiation","regulation of neuron projection development","G protein-coupled receptor …	query	0.3333333333333333	1.5691197238349287E-4	2655.3615989431096	1622.0	-3874.0
H__sapiens__1_-790642	H__sapiens__1_-790642	CD247	CD247	P20963	ENSP00000375969	919	NP_932170	NM_198053	CD3Z	-0.1329426354076196	0.8755153142473957	["GO:0006909","GO:0002431","GO:0050851","GO:0038094","GO:0043235","GO:0002433","GO:0019901","GO:0098802","GO:0038093"]	["phagocytosis","Fc receptor mediated stimulatory signaling pathway","antigen receptor-mediated signaling pathway","Fc-gamma receptor signaling pathway","receptor complex","immune response-regulating cell surface receptor signaling pathway involved in phagocytosis","protein kinase binding","plasma membrane signaling receptor complex","Fc receptor signaling pathway"]	query	0.3333333333333333	1.4988009592326138E-4	1669.2757399617317	1330.0	-3874.0
H__sapiens__1_-781589	H__sapiens__1_-781589	RSPO3	RSPO3	Q9BXY4	ENSP00000357300	84870	NP_116173	NM_032784	THSD2	-0.0863576828555949	0.9172660821853912	["GO:2000050","GO:0001738","GO:0001736","GO:0090175","GO:0035567","GO:0030177","GO:0048771","GO:0001525","GO:0007164","GO:2000027","GO:0060071"]	["regulation of non-canonical Wnt signaling pathway","morphogenesis of a polarized epithelium","establishment of planar polarity","regulation of establishment of planar polarity","non-canonical Wnt signaling pathway","positive regulation of Wnt signaling pathway","tissue remodeling","angiogenesis","establishment of tissue polarity","regulation of animal organ morphogenesis","Wnt signaling pathway…	query	0.3333333333333333	1.5720798616569723E-4	2989.0388297442687	1576.0	-3874.0
H__sapiens__1_-785545	H__sapiens__1_-785545	CDK1	CDK1	P06493	ENSP00000482996	983	NP_203698	NM_033379	CDC28A	-0.21043065450006312	0.8102352393730046	["GO:0072422","GO:0010972","GO:0048313","GO:0045685","GO:0045930","GO:0043406","GO:0072413","GO:0140014","GO:0043405","GO:0007623","GO:0043467","GO:0072331","GO:0048284","GO:0022904","GO:2000134","GO:1902751","GO:1900180","GO:0048308","GO:1902400","GO:0071902","GO:0042770","GO:0000075","GO:0071156","GO:0032147","GO:0044773","GO:0007422","GO:0007093","GO:0048511","GO:0044819","GO:0044774","GO:0044…	["signal transduction involved in DNA damage checkpoint","negative regulation of G2/M transition of mitotic cell cycle","Golgi inheritance","regulation of glial cell differentiation","negative regulation of mitotic cell cycle","positive regulation of MAP kinase activity","signal transduction involved in mitotic cell cycle checkpoint","mitotic nuclear division","regulation of MAP kinase activity",…	query	0.3333333333333333	1.4823599169878446E-4	1825.4492822863463	1556.0	-3874.0
H__sapiens__1_-784601	H__sapiens__1_-784601	IDH3A	IDH3A	P50213	ENSP00000485769	3419	NP_005521	NM_005530		-0.12910094360699523	0.8788852432210972	["GO:0015980","GO:1902652","GO:0009060","GO:0072350","GO:0045333","GO:0016616","GO:0006066","GO:0016614"]	["energy derivation by oxidation of organic compounds","secondary alcohol metabolic process","aerobic respiration","tricarboxylic acid metabolic process","cellular respiration","oxidoreductase activity, acting on the CH-OH group of donors, NAD or NADP as acceptor","alcohol metabolic process","oxidoreductase activity, acting on CH-OH group of donors"]	query	0.3333333333333333	1.4819205690574984E-4	1690.1158422591545	1180.0	-3874.0
H__sapiens__1_-773605	H__sapiens__1_-773605	MTMR1	MTMR1	Q13613	ENSP00000445281	8776	NP_003819	NM_003828		-0.13617630310552362	0.872688761186371	["GO:0034593","GO:0046839","GO:0052866","GO:0016791","GO:1903725","GO:0045017","GO:0046488","GO:0035303","GO:0030258","GO:0052744","GO:0008654","GO:0046474","GO:0019216"]	["phosphatidylinositol bisphosphate phosphatase activity","phospholipid dephosphorylation","phosphatidylinositol phosphate phosphatase activity","phosphatase activity","regulation of phospholipid metabolic process","glycerolipid biosynthetic process","phosphatidylinositol metabolic process","regulation of dephosphorylation","lipid modification","phosphatidylinositol monophosphate phosphatase acti…	query	0.3333333333333333	1.448855404230658E-4	1081.5859496368332	906.0	-3874.0
H__sapiens__1_-777202	H__sapiens__1_-777202	IL1R2	IL1R2	P27930	ENSP00000414611	7850	NP_004624	NM_004633	IL1RB	-0.15613160097674947	0.8554466053542102	["GO:0070555","GO:0019838","GO:0019955","GO:0140375","GO:0004896","GO:0071347"]	["response to interleukin-1","growth factor binding","cytokine binding","immune receptor activity","cytokine receptor activity","cellular response to interleukin-1"]	query	0.3333333333333333	1.594896331738437E-4	2994.9095268255855	1605.0	-3874.0
H__sapiens__1_-785520	H__sapiens__1_-785520	ADRA1B	ADRA1B	P35368	ENSP00000493019	147	NP_000670	NM_000679		-0.14851965706290285	0.8619830629486729	["GO:0035296","GO:1903522","GO:0008016","GO:0097756","GO:0003073","GO:0007188","GO:0019229","GO:0008227","GO:0007187","GO:0097746","GO:0045823","GO:0003018","GO:0006874","GO:0007189","GO:0071875","GO:0060047","GO:0008217","GO:0035150","GO:0019933","GO:0051480","GO:0004930","GO:0042310","GO:0003015","GO:0019935","GO:0002027","GO:1903524","GO:0003044"]	["regulation of tube diameter","regulation of blood circulation","regulation of heart contraction","negative regulation of blood vessel diameter","regulation of systemic arterial blood pressure","adenylate cyclase-modulating G protein-coupled receptor signaling pathway","regulation of vasoconstriction","G protein-coupled amine receptor activity","G protein-coupled receptor signaling pathway, coup…	query	0.3333333333333333	1.589825119236884E-4	3216.760854425715	1749.0	-3874.0
H__sapiens__1_-783866	H__sapiens__1_-783866	CXCL3	CXCL3	P19876	ENSP00000296026	2921	NP_002081	NM_002090	SCYB3	-0.1276269318471725	0.8801816856561044	["GO:1990869","GO:0071621","GO:1990266","GO:0006959","GO:0042379","GO:0030595","GO:0050900","GO:0071216","GO:0005125","GO:0060326","GO:0097530","GO:0019730","GO:0097529","GO:0001664","GO:0071219","GO:0032496","GO:0002237","GO:1990868","GO:0005126"]	["cellular response to chemokine","granulocyte chemotaxis","neutrophil migration","humoral immune response","chemokine receptor binding","leukocyte chemotaxis","leukocyte migration","cellular response to biotic stimulus","cytokine activity","cell chemotaxis","granulocyte migration","antimicrobial humoral response","myeloid leukocyte migration","G protein-coupled receptor binding","cellular respon…	query	0.3333333333333333	1.5862944162436547E-4	3377.8575443500386	1657.0	-3874.0
H__sapiens__1_-786189	H__sapiens__1_-786189	EVC2	EVC2	Q86UK5	ENSP00000431981	132884	NP_667338	NM_147127	LBN	-0.035001994275140426	0.9656034905766095	["GO:0031253"]	["cell projection membrane"]	query	0.3333333333333333	1.3896609227348526E-4	395.5685502205142	574.0	-3874.0
H__sapiens__1_-773757	H__sapiens__1_-773757	PRKCZ	PRKCZ	Q05513	ENSP00000462105	5590	NP_002735	NM_002744	PKC2	-0.22411781919916016	0.7992209652479313	["GO:2000514","GO:0043370","GO:1900076","GO:0051251","GO:0002699","GO:0002702","GO:0002449","GO:0045621","GO:0046631","GO:0042092","GO:0002703","GO:0045619","GO:0002821","GO:0071375","GO:0008286","GO:0098815","GO:0050863","GO:1903706","GO:0099177","GO:2000516","GO:0032656","GO:0002369","GO:0070372","GO:0035710","GO:0007163","GO:0046634","GO:0071559","GO:0046632","GO:0002293","GO:0050730","GO:0002…	["regulation of CD4-positive, alpha-beta T cell activation","regulation of CD4-positive, alpha-beta T cell differentiation","regulation of cellular response to insulin stimulus","positive regulation of lymphocyte activation","positive regulation of immune effector process","positive regulation of production of molecular mediator of immune response","lymphocyte mediated immunity","positive regulat…	query	0.3333333333333333	1.7088174982911826E-4	6478.161584856144	2324.0	-3874.0
H__sapiens__1_-785951	H__sapiens__1_-785951	SYNPO	SYNPO	Q8N3V7	ENSP00000429268	11346	NP_009217	NM_007286	KIAA1029	-0.13837385896628776	0.8707730845587434	["GO:1902903","GO:0051495","GO:1902905","GO:0050808","GO:0110053","GO:0044309","GO:0032956","GO:0043292","GO:0030016","GO:0098794","GO:0031674","GO:0051017","GO:0032231","GO:0015629","GO:0030425","GO:0061572","GO:0030017"]	["regulation of supramolecular fiber organization","positive regulation of cytoskeleton organization","positive regulation of supramolecular fiber organization","synapse organization","regulation of actin filament organization","neuron spine","regulation of actin cytoskeleton organization","contractile fiber","myofibril","postsynapse","I band","actin filament bundle assembly","regulation of actin…	query	0.3333333333333333	1.5820281601012498E-4	2773.6198804563383	1605.0	-3874.0
H__sapiens__1_-775659	H__sapiens__1_-775659	RAB2A	RAB2A	P61019	ENSP00000433875	5862	NP_002856	NM_002865	RAB2	-0.14181499359050861	0.8677817868284882	["GO:0001883","GO:0019001","GO:0032549","GO:0032550","GO:0032561","GO:0001882"]	["purine nucleoside binding","guanyl nucleotide binding","ribonucleoside binding","purine ribonucleoside binding","guanyl ribonucleotide binding","nucleoside binding"]	query	0.3333333333333333	1.4825796886582654E-4	1462.3297819224908	1223.0	-3874.0
H__sapiens__1_-783871	H__sapiens__1_-783871	CXCL1	CXCL1	P09341	ENSP00000379110	2919	NP_001502	NM_001511	SCYB1	-0.16567404477229072	0.847322378340415	["GO:1990869","GO:0071621","GO:1990266","GO:0006959","GO:0042379","GO:0042581","GO:0030595","GO:0050900","GO:0071216","GO:0005125","GO:0060326","GO:0097530","GO:0019730","GO:0097529","GO:0001664","GO:0071219","GO:0070820","GO:0034774","GO:0032496","GO:0002237","GO:1990868","GO:0005126"]	["cellular response to chemokine","granulocyte chemotaxis","neutrophil migration","humoral immune response","chemokine receptor binding","specific granule","leukocyte chemotaxis","leukocyte migration","cellular response to biotic stimulus","cytokine activity","cell chemotaxis","granulocyte migration","antimicrobial humoral response","myeloid leukocyte migration","G protein-coupled receptor bindin…	query	0.3333333333333333	1.6233766233766234E-4	4245.464191718274	1799.0	-3874.0
H__sapiens__1_-773155	H__sapiens__1_-773155	FHL1	FHL1	Q13642	ENSP00000499033	2273	NP_001440	NM_001449	XMPMA	-0.17090311749611492	0.8429032320915681	["GO:0071805","GO:1901991","GO:0000082","GO:0032409","GO:0045930","GO:0044843","GO:1904062","GO:0044839","GO:2000045","GO:0032412","GO:0043266","GO:0042391","GO:0010959","GO:1902750","GO:0000086","GO:1902749","GO:0043270","GO:1901988","GO:1902806","GO:0051899","GO:0022898","GO:1901379","GO:0010389","GO:0045926","GO:1902807","GO:0034765","GO:0001558"]	["potassium ion transmembrane transport","negative regulation of mitotic cell cycle phase transition","G1/S transition of mitotic cell cycle","regulation of transporter activity","negative regulation of mitotic cell cycle","cell cycle G1/S phase transition","regulation of cation transmembrane transport","cell cycle G2/M phase transition","regulation of G1/S transition of mitotic cell cycle","regu…	query	0.3333333333333333	1.6056518946692356E-4	3358.258885288124	1685.0	-3874.0
H__sapiens__1_-789848	H__sapiens__1_-789848	PTPN1	PTPN1	P18031	ENSP00000437732	5770	NP_002818	NM_002827	PTP1B	-0.1468023692824006	0.8634646076849113	["GO:0043409","GO:0035966","GO:0034976","GO:1900076","GO:0043405","GO:0006984","GO:0018212","GO:0071901","GO:0032801","GO:0060337","GO:0001933","GO:0035967","GO:0071378","GO:0060396","GO:0060416","GO:0043112","GO:1901653","GO:0033673","GO:0006469","GO:0006986","GO:0048008","GO:0140467","GO:1990782","GO:0071375","GO:0008286","GO:0045088","GO:0032386","GO:0048010","GO:0006470","GO:0019901","GO:0090…	["negative regulation of MAPK cascade","response to topologically incorrect protein","response to endoplasmic reticulum stress","regulation of cellular response to insulin stimulus","regulation of MAP kinase activity","ER-nucleus signaling pathway","peptidyl-tyrosine modification","negative regulation of protein serine/threonine kinase activity","receptor catabolic process","type I interferon sig…	query	0.3333333333333333	1.5676438313215238E-4	2975.1927973546785	1654.0	-3874.0
H__sapiens__1_-787620	H__sapiens__1_-787620	CYP8B1	CYP8B1	Q9UNU6	ENSP00000404499	1582	NP_004382	NM_004391	CYP12	-0.08390537578032699	0.919518260676581	["GO:0030301","GO:0004497","GO:0015850","GO:0032373","GO:0032376","GO:0006869","GO:0044241","GO:0032370","GO:0008206","GO:1905952","GO:0007586","GO:0032371","GO:0006694","GO:0098856","GO:0008395","GO:0072330","GO:0046394","GO:0016053","GO:1905954","GO:1901617","GO:0015918","GO:0022600","GO:0032368","GO:0008202","GO:0050892","GO:0032374","GO:0016705","GO:0044058"]	["cholesterol transport","monooxygenase activity","organic hydroxy compound transport","positive regulation of sterol transport","positive regulation of cholesterol transport","lipid transport","lipid digestion","positive regulation of lipid transport","bile acid metabolic process","regulation of lipid localization","digestion","regulation of sterol transport","steroid biosynthetic process","inte…	query	0.3333333333333333	1.5278838808250572E-4	2333.441394144056	1258.0	-3874.0
H__sapiens__1_-784219	H__sapiens__1_-784219	SLC4A2	SLC4A2	P04920	ENSP00000419412	6522	NP_003031	NM_003040	NBND3	-0.19051296002041695	0.8265350457485744	["GO:0030641","GO:0055067","GO:0006885","GO:0022853","GO:0022804","GO:0030004","GO:0045177"]	["regulation of cellular pH","monovalent inorganic cation homeostasis","regulation of pH","active ion transmembrane transporter activity","active transmembrane transporter activity","cellular monovalent inorganic cation homeostasis","apical part of cell"]	query	0.3333333333333333	1.5666614444618518E-4	3024.3668792715944	1429.0	-3874.0
H__sapiens__1_-782804	H__sapiens__1_-782804	SEC13	SEC13	P55735	ENSP00000404141	6396	NP_899195	NM_183352	SEC13R	-0.19803378302106045	0.8203421390339408	["GO:0046939","GO:0031929","GO:1903578","GO:0034605","GO:0030662","GO:0009132","GO:0046034","GO:0043467","GO:0019882","GO:0006757","GO:0009185","GO:0060147","GO:0051668","GO:0035859","GO:0030135","GO:0006900","GO:0002495","GO:0006109","GO:0009135","GO:0016052","GO:0009408","GO:0016050","GO:0032006","GO:0051648","GO:0006140","GO:0051650","GO:0030134","GO:0030133","GO:1900542","GO:0009179","GO:0005…	["nucleotide phosphorylation","TOR signaling","regulation of ATP metabolic process","cellular response to heat","coated vesicle membrane","nucleoside diphosphate metabolic process","ATP metabolic process","regulation of generation of precursor metabolites and energy","antigen processing and presentation","ATP generation from ADP","ribonucleoside diphosphate metabolic process","regulation of postt…	query	0.3333333333333333	1.5730690577316344E-4	3310.0998049623363	1618.0	-3874.0
H__sapiens__1_-777478	H__sapiens__1_-777478	TNFSF4	TNFSF4	P23510	ENSP00000356691	7292	NP_003317	NM_003326	TXGP1	-0.1613962401717342	0.8509548218109717	["GO:2000514","GO:0009306","GO:0042113","GO:0043370","GO:0002825","GO:0045581","GO:0045190","GO:0051251","GO:0002699","GO:0034612","GO:0002702","GO:0022408","GO:0002449","GO:0050868","GO:0070542","GO:0048305","GO:0045621","GO:0046631","GO:0042092","GO:0002703","GO:0002891","GO:0045619","GO:0046639","GO:0002821","GO:0002823","GO:0071216","GO:0002793","GO:0050863","GO:0016444","GO:0051250","GO:0002…	["regulation of CD4-positive, alpha-beta T cell activation","protein secretion","B cell activation","regulation of CD4-positive, alpha-beta T cell differentiation","regulation of T-helper 1 type immune response","negative regulation of T cell differentiation","isotype switching","positive regulation of lymphocyte activation","positive regulation of immune effector process","response to tumor necr…	query	0.3333333333333333	1.590077913817777E-4	3198.7921256781087	1586.0	-3874.0
H__sapiens__1_-773588	H__sapiens__1_-773588	VMP1	VMP1	Q96GC9	ENSP00000467350	81671	NP_112200	NM_030938	TMEM49	-0.09099831377679812	0.9130192504522117	["GO:0005776","GO:0007033","GO:1905037","GO:0016236"]	["autophagosome","vacuole organization","autophagosome organization","macroautophagy"]	query	0.3333333333333333	1.5855398763278897E-4	3399.4522345854175	1599.0	-3874.0
H__sapiens__1_-776911	H__sapiens__1_-776911	THBS4	THBS4	P35443	ENSP00000422298	7060	NP_003239	NM_003248		-0.16110697617715744	0.8512010080066177	["GO:0005539","GO:1990266","GO:0001935","GO:0001936","GO:0071622","GO:0014812","GO:1901681","GO:0050678","GO:0048771","GO:0002690","GO:0097530","GO:0050730","GO:0097529","GO:0002687","GO:0018212","GO:0050673","GO:0050679","GO:1901343","GO:0016528","GO:0001525","GO:0002688","GO:1901342","GO:0071621","GO:1902624","GO:0030335","GO:0071624","GO:1902622","GO:0045765","GO:2000181","GO:0018108","GO:0030…	["glycosaminoglycan binding","neutrophil migration","endothelial cell proliferation","regulation of endothelial cell proliferation","regulation of granulocyte chemotaxis","muscle cell migration","sulfur compound binding","regulation of epithelial cell proliferation","tissue remodeling","positive regulation of leukocyte chemotaxis","granulocyte migration","regulation of peptidyl-tyrosine phosphory…	query	0.3333333333333333	1.5943877551020407E-4	2837.1603900522246	1563.0	-3874.0
H__sapiens__1_-780407	H__sapiens__1_-780407	STAT4	STAT4	Q14765	ENSP00000495153	6775	NP_003142	NM_003151		-0.19608824509286776	0.8219396993326902	["GO:0097696","GO:0071349","GO:0070671"]	["receptor signaling pathway via STAT","cellular response to interleukin-12","response to interleukin-12"]	query	0.3333333333333333	1.6823687752355316E-4	5091.721310254159	2012.0	-3874.0
H__sapiens__1_-783880	H__sapiens__1_-783880	RYK	RYK	P34925	ENSP00000487023	6259	NP_002949	NM_002958	RYK1	-0.15723576047847845	0.8545025771314634	["GO:0061351","GO:0001736","GO:0050808","GO:0004713","GO:1904948","GO:0060071","GO:0030900","GO:0021953","GO:0019199","GO:0001664","GO:0001738","GO:0007420","GO:0007409","GO:0090175","GO:0035567","GO:0097485","GO:0007164","GO:2000027","GO:0030901","GO:0071542"]	["neural precursor cell proliferation","establishment of planar polarity","synapse organization","protein tyrosine kinase activity","midbrain dopaminergic neuron differentiation","Wnt signaling pathway, planar cell polarity pathway","forebrain development","central nervous system neuron differentiation","transmembrane receptor protein kinase activity","G protein-coupled receptor binding","morphog…	query	0.3333333333333333	1.4729709824716454E-4	1278.9840423549163	1033.0	-3874.0
H__sapiens__1_-780287	H__sapiens__1_-780287	THBS1	THBS1	P07996	ENSP00000380720	7057	NP_003237	NM_003246	TSP1	-0.12467243807411407	0.8827860223193178	["GO:0042116","GO:1903825","GO:0031091","GO:0150116","GO:0043065","GO:0002687","GO:0019955","GO:0034766","GO:0001937","GO:0001525","GO:0090109","GO:0008625","GO:1904019","GO:0071902","GO:0051346","GO:0050817","GO:0007179","GO:0048246","GO:0032369","GO:0030335","GO:1903959","GO:0030219","GO:0009986","GO:0002040","GO:0046942","GO:1905523","GO:0015908","GO:0010633","GO:0043542","GO:0043535","GO:0010…	["macrophage activation","organic acid transmembrane transport","platelet alpha granule","regulation of cell-substrate junction organization","positive regulation of apoptotic process","positive regulation of leukocyte migration","cytokine binding","negative regulation of ion transmembrane transport","negative regulation of endothelial cell proliferation","angiogenesis","regulation of cell-substr…	query	0.3333333333333333	1.5044380923724988E-4	1385.8133946995838	1276.0	-3874.0
H__sapiens__1_-779952	H__sapiens__1_-779952	DRAM1	DRAM1	Q8N682	ENSP00000448075	55332	NP_060840	NM_018370	FLJ11259	-0.13378562558169899	0.8747775744376229			query	0.3333333333333333	1.6564518800728838E-4	3894.1288018551986	1810.0	-3874.0
H__sapiens__1_-780889	H__sapiens__1_-780889	CSNK1D	CSNK1D	P48730	ENSP00000464551	1453	NP_620693	NM_139062	HCKID	-0.1357323001715978	0.8730763235897969	["GO:2000050","GO:0018209","GO:0022406","GO:0007623","GO:1904948","GO:0044839","GO:0007420","GO:0006900","GO:2000058","GO:0045732","GO:1901800","GO:0016050","GO:1903364","GO:0030901","GO:0051648","GO:0051258","GO:1903052","GO:0051650","GO:0061136","GO:0000086","GO:1902749","GO:1903362","GO:2000060","GO:0045664","GO:0048511","GO:0045862","GO:0021953","GO:0032434","GO:0060070","GO:0035567","GO:0030…	["regulation of non-canonical Wnt signaling pathway","peptidyl-serine modification","membrane docking","circadian rhythm","midbrain dopaminergic neuron differentiation","cell cycle G2/M phase transition","brain development","vesicle budding from membrane","regulation of ubiquitin-dependent protein catabolic process","positive regulation of protein catabolic process","positive regulation of protea…	query	0.3333333333333333	1.4963339817447254E-4	1657.330830392478	1285.0	-3874.0
H__sapiens__1_-792543	H__sapiens__1_-792543	DAXX	DAXX	Q9UER7	ENSP00000484830	1616	NP_001341	NM_001350	DAP6	-0.15427699435510872	0.8570345943852803	["GO:0031098","GO:0071248","GO:0035966","GO:0043406","GO:0044389","GO:0043405","GO:0019209","GO:0030518","GO:0097191","GO:0010038","GO:0051427","GO:0030522","GO:0061629","GO:0043506","GO:0071241","GO:1903320","GO:0009408","GO:0035967","GO:0071902","GO:0035257","GO:0048545","GO:0032147","GO:0035258","GO:0046685","GO:0000187","GO:0016922","GO:0019887","GO:0019207","GO:0006986","GO:0009266","GO:0046…	["stress-activated protein kinase signaling cascade","cellular response to metal ion","response to topologically incorrect protein","positive regulation of MAP kinase activity","ubiquitin-like protein ligase binding","regulation of MAP kinase activity","kinase activator activity","intracellular steroid hormone receptor signaling pathway","extrinsic apoptotic signaling pathway","response to metal …	query	0.3333333333333333	1.4779781259237365E-4	1507.8226990920093	1137.0	-3874.0
H__sapiens__1_-783869	H__sapiens__1_-783869	PF4	PF4	P02776	ENSP00000296029	5196	NP_002610	NM_002619	SCYB4	-0.1636452624535752	0.849043155951219	["GO:1990869","GO:1990266","GO:0006959","GO:0045639","GO:0031091","GO:0030099","GO:0045342","GO:1903708","GO:0007188","GO:2001234","GO:0045346","GO:0002761","GO:0051883","GO:0034774","GO:1901343","GO:0001525","GO:2001236","GO:2001233","GO:2001237","GO:0007596","GO:0031640","GO:0050817","GO:1901342","GO:0030595","GO:1902105","GO:0001562","GO:0030219","GO:0001906","GO:0050900","GO:0071216","GO:0005…	["cellular response to chemokine","neutrophil migration","humoral immune response","positive regulation of myeloid cell differentiation","platelet alpha granule","myeloid cell differentiation","MHC class II biosynthetic process","positive regulation of hemopoiesis","adenylate cyclase-modulating G protein-coupled receptor signaling pathway","negative regulation of apoptotic signaling pathway","reg…	query	0.3333333333333333	1.6512549537648613E-4	4765.062788513366	1958.0	-3874.0
H__sapiens__1_-776073	H__sapiens__1_-776073	GLI3	GLI3	P10071	ENSP00000496377	2737	NP_000159	NM_000168	PPDIV	-0.17051055615253213	0.8432341882729197	["GO:0030326","GO:0045581","GO:0030217","GO:0007224","GO:0051251","GO:1903708","GO:0035113","GO:0070227","GO:0045620","GO:0071887","GO:0022408","GO:1903707","GO:0050868","GO:0045621","GO:0045582","GO:0046631","GO:0045619","GO:0045058","GO:0035108","GO:1902105","GO:0022409","GO:0050863","GO:0060070","GO:0051250","GO:0090596","GO:1903039","GO:1903706","GO:0030178","GO:0048568","GO:0002695","GO:0048…	["embryonic limb morphogenesis","negative regulation of T cell differentiation","T cell differentiation","smoothened signaling pathway","positive regulation of lymphocyte activation","positive regulation of hemopoiesis","embryonic appendage morphogenesis","lymphocyte apoptotic process","negative regulation of lymphocyte differentiation","leukocyte apoptotic process","negative regulation of cell-c…	query	0.3333333333333333	1.6622340425531914E-4	4735.959143935432	2163.0	-3874.0
H__sapiens__1_-773849	H__sapiens__1_-773849	CLTCL1	CLTCL1	P53675	ENSP00000485020	8218	NP_009029	NM_007098	CLTD	-0.18051052321881234	0.8348438954057333	["GO:0016197","GO:0046323","GO:0008643","GO:1904659","GO:0010827","GO:0034219","GO:0008645","GO:0030139","GO:0046324","GO:0030276","GO:0015749","GO:0030135","GO:0010828","GO:0034764","GO:0030136"]	["endosomal transport","glucose import","carbohydrate transport","glucose transmembrane transport","regulation of glucose transmembrane transport","carbohydrate transmembrane transport","hexose transmembrane transport","endocytic vesicle","regulation of glucose import","clathrin binding","monosaccharide transmembrane transport","coated vesicle","positive regulation of glucose transmembrane transp…	query	0.3333333333333333	1.6231131309852296E-4	4065.575181578123	1731.0	-3874.0
H__sapiens__1_-827726	H__sapiens__1_-827726	CASTOR2	GATSL2	A6NHX0	ENSP00000484732	729438	NP_001138536	NM_001145064	GATSL2	-0.0382081221318666	0.962512599869989	["GO:0001101","GO:0031929","GO:0016597","GO:0043200","GO:0043177","GO:0031406","GO:0035859","GO:0038202","GO:1903432","GO:0071229","GO:0032007","GO:0071230","GO:0032006"]	["response to acid chemical","TOR signaling","amino acid binding","response to amino acid","organic acid binding","carboxylic acid binding","Seh1-associated complex","TORC1 signaling","regulation of TORC1 signaling","cellular response to acid chemical","negative regulation of TOR signaling","cellular response to amino acid stimulus","regulation of TOR signaling"]	query	0.3333333333333333	1.4386419220256078E-4	915.718939078277	804.0	-3874.0
H__sapiens__1_-779545	H__sapiens__1_-779545	HSD17B4	HSD17B4	P51659	ENSP00000496432	3295	NP_001361432	NM_001374503	SDR8C1	-0.1903564880961511	0.8266643853964037	["GO:0006631","GO:1901568","GO:0044242","GO:0035383","GO:0034440","GO:0001676","GO:0005777","GO:0016042","GO:0120254","GO:0072662","GO:0006637","GO:0033865","GO:0016836","GO:0008206","GO:0016614","GO:0007031","GO:0030258","GO:0033875","GO:0019395","GO:0042579","GO:0006694","GO:0072330","GO:0043574","GO:0046394","GO:0009062","GO:0016053","GO:0031907","GO:1901617","GO:0046395","GO:0072329","GO:0016…	["fatty acid metabolic process","fatty acid derivative metabolic process","cellular lipid catabolic process","thioester metabolic process","lipid oxidation","long-chain fatty acid metabolic process","peroxisome","lipid catabolic process","olefinic compound metabolic process","protein localization to peroxisome","acyl-CoA metabolic process","nucleoside bisphosphate metabolic process","hydro-lyase …	query	0.3333333333333333	1.574555188159345E-4	3326.9562021651773	1587.0	-3874.0
H__sapiens__1_-781860	H__sapiens__1_-781860	PARD3	PARD3	Q8TEW0	ENSP00000444429	56288	NP_062565	NM_019619	PPP1R118	-0.11734186350401618	0.8892811284294346	["GO:0030010","GO:0045216","GO:0007163","GO:0043297","GO:0031644","GO:0010001","GO:0071559","GO:0007272","GO:0042063","GO:0001933","GO:0005911","GO:0043296","GO:0051301","GO:0018210","GO:0045177","GO:0051960","GO:0030424","GO:0007422","GO:0010799","GO:0070160","GO:0018107","GO:0120192","GO:1901981","GO:0007178","GO:0120193","GO:1902936","GO:0021782","GO:0035091","GO:0007043","GO:0035088","GO:0071…	["establishment of cell polarity","cell-cell junction organization","establishment or maintenance of cell polarity","apical junction assembly","regulation of nervous system process","glial cell differentiation","response to transforming growth factor beta","ensheathment of neurons","gliogenesis","negative regulation of protein phosphorylation","cell-cell junction","apical junction complex","cell …	query	0.3333333333333333	1.588057805304113E-4	3291.961423599789	1817.0	-3874.0
H__sapiens__1_-784398	H__sapiens__1_-784398	VDAC2	VDAC2	P45880	ENSP00000443092	7417	NP_003366	NM_003375		-0.1923483659311539	0.8250194097692725	["GO:1902110","GO:0005244","GO:1905710","GO:0043178","GO:0006839","GO:0050997","GO:0046625","GO:0019867","GO:0022832","GO:0035794","GO:0008637","GO:0046902","GO:0031968","GO:0007006","GO:1902686","GO:1902108","GO:0032934","GO:0005496","GO:0090559"]	["positive regulation of mitochondrial membrane permeability involved in apoptotic process","voltage-gated ion channel activity","positive regulation of membrane permeability","alcohol binding","mitochondrial transport","quaternary ammonium group binding","sphingolipid binding","outer membrane","voltage-gated channel activity","positive regulation of mitochondrial membrane permeability","apoptoti…	query	0.3333333333333333	1.5931177314003505E-4	3489.9684812361425	1756.0	-3874.0
H__sapiens__1_-779934	H__sapiens__1_-779934	EDAR	EDAR	Q9UNE0	ENSP00000386371	10913	NP_071731	NM_022336	EDA3	-0.17037828058565543	0.8433457349304694	["GO:0070304","GO:0046328","GO:0032872","GO:0031098","GO:0071356","GO:0007254","GO:0070302","GO:0051403","GO:0007249","GO:0032874","GO:0034612","GO:0043122"]	["positive regulation of stress-activated protein kinase signaling cascade","regulation of JNK cascade","regulation of stress-activated MAPK cascade","stress-activated protein kinase signaling cascade","cellular response to tumor necrosis factor","JNK cascade","regulation of stress-activated protein kinase signaling cascade","stress-activated MAPK cascade","I-kappaB kinase/NF-kappaB signaling","p…	query	0.3333333333333333	1.766472354707649E-4	7605.191357439141	2297.0	-3874.0
H__sapiens__1_-777110	H__sapiens__1_-777110	ACTR3	ACTR3	P61158	ENSP00000444987	10096	NP_005712	NM_005721		-0.18142023524718	0.8340847732159196	["GO:0032273","GO:0006909","GO:0002431","GO:0030838","GO:0032535","GO:0030832","GO:0030041","GO:1902745","GO:0031252","GO:0003779","GO:0038094","GO:0097581","GO:0015629","GO:0120034","GO:0002433","GO:0032271","GO:0008064","GO:0051258","GO:1902903","GO:0051495","GO:1902905","GO:0031346","GO:0110053","GO:0120032","GO:0032956","GO:0008154","GO:0010591","GO:1902743","GO:0030833","GO:0038093","GO:0090…	["positive regulation of protein polymerization","phagocytosis","Fc receptor mediated stimulatory signaling pathway","positive regulation of actin filament polymerization","regulation of cellular component size","regulation of actin filament length","actin filament polymerization","positive regulation of lamellipodium organization","cell leading edge","actin binding","Fc-gamma receptor signaling …	query	0.3333333333333333	1.5800284405119292E-4	3450.2107351019235	1812.0	-3874.0
H__sapiens__1_-780956	H__sapiens__1_-780956	IFNAR1	IFNAR1	P17181	ENSP00000498666	3454	NP_000620	NM_000629	IFRC	-0.1532722646885243	0.857896115192831	["GO:0097696","GO:0019955","GO:0140375","GO:0004896","GO:0071357","GO:0034340","GO:0002237"]	["receptor signaling pathway via STAT","cytokine binding","immune receptor activity","cytokine receptor activity","cellular response to type I interferon","response to type I interferon","response to molecule of bacterial origin"]	query	0.3333333333333333	1.5688735487919673E-4	2912.2390390307505	1677.0	-3874.0
H__sapiens__1_-783705	H__sapiens__1_-783705	TGFA	TGFA	P01135	ENSP00000414127	7039	NP_003227	NM_003236		-0.1401528898345959	0.8692253295222288	["GO:0051785","GO:2000273","GO:0061098","GO:0030662","GO:0045787","GO:0043406","GO:0140014","GO:0043405","GO:0050678","GO:0042058","GO:0007173","GO:0050730","GO:0043491","GO:0050731","GO:0010469","GO:0061097","GO:0018212","GO:0007176","GO:0030135","GO:0007088","GO:0050673","GO:0051783","GO:0006900","GO:0070851","GO:0016050","GO:0071902","GO:0030136","GO:0090068","GO:0045742","GO:0051648","GO:1901…	["positive regulation of nuclear division","positive regulation of signaling receptor activity","positive regulation of protein tyrosine kinase activity","coated vesicle membrane","positive regulation of cell cycle","positive regulation of MAP kinase activity","mitotic nuclear division","regulation of MAP kinase activity","regulation of epithelial cell proliferation","regulation of epidermal grow…	query	0.3333333333333333	1.5873015873015873E-4	3262.8120328857103	1704.0	-3874.0
H__sapiens__1_-789805	H__sapiens__1_-789805	SUPT3H	SUPT3H	O75486	ENSP00000501386	8464	NP_852001	NM_181356	SPT3L	-0.15359199501280696	0.8576218636353257	["GO:0061695","GO:0016573","GO:0006473","GO:0006475","GO:0018393","GO:0090575","GO:0043543","GO:0070646","GO:0018394","GO:0005667"]	["transferase complex, transferring phosphorus-containing groups","histone acetylation","protein acetylation","internal protein amino acid acetylation","internal peptidyl-lysine acetylation","RNA polymerase II transcription regulator complex","protein acylation","protein modification by small protein removal","peptidyl-lysine acetylation","transcription regulator complex"]	query	0.3333333333333333	1.5313935681470137E-4	2372.476671351893	1431.0	-3874.0
H__sapiens__1_-789412	H__sapiens__1_-789412	TUBB4B	TUBB4B	P68371	ENSP00000341289	10383	NP_006079	NM_006088	TUBB2C	-0.16439599240809738	0.8484059930199388	["GO:0001883","GO:0022406","GO:0005766","GO:0032549","GO:0000086","GO:1902749","GO:0042287","GO:0001906","GO:0044839","GO:0019001","GO:0042582","GO:0034774","GO:0032550","GO:0001909","GO:0002449","GO:0032561","GO:0001882","GO:0005775","GO:0002228"]	["purine nucleoside binding","membrane docking","primary lysosome","ribonucleoside binding","G2/M transition of mitotic cell cycle","regulation of cell cycle G2/M phase transition","MHC protein binding","cell killing","cell cycle G2/M phase transition","guanyl nucleotide binding","azurophil granule","secretory granule lumen","purine ribonucleoside binding","leukocyte mediated cytotoxicity","lymph…	query	0.3333333333333333	1.567152483936687E-4	3188.993510778811	1555.0	-3874.0
H__sapiens__1_-775306	H__sapiens__1_-775306	LIPG	LIPG	Q9Y5X9	ENSP00000463835	9388	NP_006024	NM_006033	EDL	-0.14916108209641138	0.8614303427168841	["GO:0006631","GO:0044242","GO:0030301","GO:0015850","GO:0032373","GO:0006869","GO:0016042","GO:0046464","GO:0032370","GO:0055088","GO:1905952","GO:0034367","GO:0006638","GO:0032371","GO:0010984","GO:0006641","GO:0046461","GO:0097006","GO:0072330","GO:0016298","GO:0046394","GO:0016053","GO:0006639","GO:1905954","GO:0071827","GO:0034368","GO:0071825","GO:0055092","GO:0015918","GO:0034381","GO:0032…	["fatty acid metabolic process","cellular lipid catabolic process","cholesterol transport","organic hydroxy compound transport","positive regulation of sterol transport","lipid transport","lipid catabolic process","acylglycerol catabolic process","positive regulation of lipid transport","lipid homeostasis","regulation of lipid localization","protein-containing complex remodeling","neutral lipid m…	query	0.3333333333333333	1.6633399866932801E-4	4580.208537488523	1835.0	-3874.0
H__sapiens__1_-783454	H__sapiens__1_-783454	SYVN1	SYVN1	Q86TM6	ENSP00000436984	84447	NP_757385	NM_172230	HRD1	-0.03572993065519394	0.9649008484375268	["GO:0097193","GO:0042113","GO:0035966","GO:0034976","GO:0070059","GO:0000209","GO:2001234","GO:0000151","GO:2001233","GO:0035967","GO:0004842","GO:0030098","GO:0034620","GO:0061659","GO:2001243","GO:0031647","GO:0006986","GO:0030183","GO:2001242","GO:1902235","GO:0005789","GO:0031227","GO:0030968","GO:0043161","GO:1905897"]	["intrinsic apoptotic signaling pathway","B cell activation","response to topologically incorrect protein","response to endoplasmic reticulum stress","intrinsic apoptotic signaling pathway in response to endoplasmic reticulum stress","protein polyubiquitination","negative regulation of apoptotic signaling pathway","ubiquitin ligase complex","regulation of apoptotic signaling pathway","cellular re…	query	0.3333333333333333	1.327668613913967E-4	118.02481266192383	254.0	-3874.0
H__sapiens__1_-789943	H__sapiens__1_-789943	TLR7	TLR7	Q9NYK1	ENSP00000370034	51284	NP_057646	NM_016562		-0.12341826301823877	0.8838938851099065	["GO:0009612","GO:0032602","GO:0032608","GO:0045335","GO:0032647","GO:0036019","GO:0030139","GO:0032481","GO:0002221","GO:0032479","GO:0007249","GO:0038061","GO:0032649","GO:0104004","GO:0050727","GO:0071496","GO:0032607","GO:0032606","GO:0005765","GO:0032635","GO:0009615","GO:0010008","GO:0032648","GO:0031349","GO:0071214","GO:0032675","GO:0032637","GO:0032677","GO:1901222","GO:0002224","GO:0032…	["response to mechanical stimulus","chemokine production","interferon-beta production","phagocytic vesicle","regulation of interferon-alpha production","endolysosome","endocytic vesicle","positive regulation of type I interferon production","pattern recognition receptor signaling pathway","regulation of type I interferon production","I-kappaB kinase/NF-kappaB signaling","NIK/NF-kappaB signaling",…	query	0.3333333333333333	1.5042117930204573E-4	1705.2769586103113	1238.0	-3874.0
H__sapiens__1_-779649	H__sapiens__1_-779649	GRP	GRP	P07492	ENSP00000434101	2922	NP_002082	NM_002091		-0.1704866605137453	0.8432543381332414	["GO:0030072","GO:0002791","GO:0009914","GO:0046879","GO:0008277","GO:0046887","GO:0090276","GO:0046883","GO:1903532","GO:0007200","GO:0002793","GO:0051047"]	["peptide hormone secretion","regulation of peptide secretion","hormone transport","hormone secretion","regulation of G protein-coupled receptor signaling pathway","positive regulation of hormone secretion","regulation of peptide hormone secretion","regulation of hormone secretion","positive regulation of secretion by cell","phospholipase C-activating G protein-coupled receptor signaling pathway"…	query	0.3333333333333333	1.569612305760477E-4	2559.863127916132	1512.0	-3874.0
H__sapiens__1_-772834	H__sapiens__1_-772834	TSPOAP1	TSPOAP1	O95153	ENSP00000462822	9256	NP_077729	NM_024418	RIMBP1	-0.1746838021373188	0.839722497254324	["GO:0006835","GO:0001505","GO:0006836","GO:0015800","GO:0099643","GO:0015849","GO:0046942","GO:0042446","GO:0008202","GO:0034754","GO:0006865","GO:0042445","GO:0120178","GO:0008207","GO:0006694"]	["dicarboxylic acid transport","regulation of neurotransmitter levels","neurotransmitter transport","acidic amino acid transport","signal release from synapse","organic acid transport","carboxylic acid transport","hormone biosynthetic process","steroid metabolic process","cellular hormone metabolic process","amino acid transport","hormone metabolic process","steroid hormone biosynthetic process",…	query	0.3333333333333333	1.5620118712902218E-4	3140.2802774241495	1391.0	-3874.0
H__sapiens__1_-783269	H__sapiens__1_-783269	SHC1	SHC1	P29353	ENSP00000404908	6464	NP_892113	NM_183001	ShcA	-0.17045318079083682	0.8432825705274272	["GO:0070372","GO:0035966","GO:0060090","GO:0034976","GO:0043406","GO:0043405","GO:0030159","GO:0043434","GO:0050730","GO:0010469","GO:0061097","GO:0018212","GO:0070851","GO:0097485","GO:0035967","GO:0051219","GO:0071902","GO:0070371","GO:0007265","GO:0071352","GO:0070669","GO:0032147","GO:0034620","GO:1901653","GO:0071350","GO:0018108","GO:0006986","GO:0032869","GO:1990782","GO:0071375","GO:0051…	["regulation of ERK1 and ERK2 cascade","response to topologically incorrect protein","molecular adaptor activity","response to endoplasmic reticulum stress","positive regulation of MAP kinase activity","regulation of MAP kinase activity","signaling receptor complex adaptor activity","response to peptide hormone","regulation of peptidyl-tyrosine phosphorylation","regulation of signaling receptor a…	query	0.3333333333333333	1.5475085112968121E-4	2340.1587079135543	1687.0	-3874.0
H__sapiens__1_-785552	H__sapiens__1_-785552	FOS	FOS	P01100	ENSP00000452590	2353	NP_005243	NM_005252	c-fos	-0.17096525570993285	0.842850857217562	["GO:0045944","GO:0033613","GO:0071248","GO:0062197","GO:0046332","GO:0061614","GO:0006979","GO:1902893","GO:0071559","GO:0034599","GO:0010038","GO:0038093","GO:0005667","GO:0046686","GO:0007178","GO:0061629","GO:0000302","GO:0070997","GO:0071241","GO:1901214","GO:0090575","GO:0071560"]	["positive regulation of transcription by RNA polymerase II","activating transcription factor binding","cellular response to metal ion","cellular response to chemical stress","SMAD binding","pri-miRNA transcription by RNA polymerase II","response to oxidative stress","regulation of pri-miRNA transcription by RNA polymerase II","response to transforming growth factor beta","cellular response to ox…	query	0.3333333333333333	1.5743073047858942E-4	2758.8507590589297	1710.0	-3874.0
H__sapiens__1_-775437	H__sapiens__1_-775437	SUPT20H	SUPT20H	Q8NEM7	ENSP00000473592	55578	NP_060039	NM_017569	SPT20	-0.13389147007815796	0.8746849889456618	["GO:1905368"]	["peptidase complex"]	query	0.3333333333333333	1.4182385477237272E-4	808.6320850028357	725.0	-3874.0
H__sapiens__1_-781045	H__sapiens__1_-781045	PRKACB	PRKACB	P22694	ENSP00000481980	5567	NP_997461	NM_207578	PKACb	-0.1910661067887387	0.8260779769838231	["GO:0044389","GO:0034377","GO:0043434","GO:0002220","GO:0033762","GO:0007187","GO:0097006","GO:0030104","GO:0050817","GO:0002833","GO:0032147","GO:0002758","GO:0071827","GO:0071825","GO:0003014","GO:1901653","GO:0065005","GO:0045089","GO:0071375","GO:0045088","GO:0002218","GO:0031349","GO:0004674","GO:0050891","GO:0007599"]	["ubiquitin-like protein ligase binding","plasma lipoprotein particle assembly","response to peptide hormone","innate immune response activating cell surface receptor signaling pathway","response to glucagon","G protein-coupled receptor signaling pathway, coupled to cyclic nucleotide second messenger","regulation of plasma lipoprotein particle levels","water homeostasis","coagulation","positive r…	query	0.3333333333333333	1.5583606046439146E-4	3085.4959919632224	1623.0	-3874.0
H__sapiens__1_-776119	H__sapiens__1_-776119	TNFSF8	TNFSF8	P32971	ENSP00000484651	944	NP_001239219	NM_001252290	CD30LG	-0.13033828970476594	0.877798430515401	["GO:0071356","GO:0030217","GO:0036037","GO:0046632","GO:0034612","GO:0046651","GO:0050670","GO:0050863","GO:0042098","GO:0070663","GO:0032943","GO:0032944","GO:0030098","GO:0046631","GO:0070661"]	["cellular response to tumor necrosis factor","T cell differentiation","CD8-positive, alpha-beta T cell activation","alpha-beta T cell differentiation","response to tumor necrosis factor","lymphocyte proliferation","regulation of lymphocyte proliferation","regulation of T cell activation","T cell proliferation","regulation of leukocyte proliferation","mononuclear cell proliferation","regulation o…	query	0.3333333333333333	1.5590894917368256E-4	2696.0523212435432	1461.0	-3874.0
H__sapiens__1_-775654	H__sapiens__1_-775654	PLAT	PLAT	P00750	ENSP00000429801	5327	NP_127509	NM_033011		-0.17820558754233204	0.8367703762388412	["GO:0030193","GO:1903035","GO:0050818","GO:0051604","GO:0014812","GO:1903034","GO:0030195","GO:1900046","GO:0016485","GO:0061041","GO:0031638","GO:0008236","GO:0050819","GO:0007596","GO:0007599","GO:1900047","GO:0050817","GO:0061045","GO:0032102"]	["regulation of blood coagulation","negative regulation of response to wounding","regulation of coagulation","protein maturation","muscle cell migration","regulation of response to wounding","negative regulation of blood coagulation","regulation of hemostasis","protein processing","regulation of wound healing","zymogen activation","serine-type peptidase activity","negative regulation of coagulati…	query	0.3333333333333333	1.6404199475065617E-4	3878.5184637698007	1866.0	-3874.0
H__sapiens__1_-776074	H__sapiens__1_-776074	PSMA2	PSMA2	P25787	ENSP00000414832	5683	NP_002778	NM_002787	PMSA2	-0.16247797409418038	0.8500348128059367	["GO:0070555","GO:0045930","GO:0043620","GO:0071456","GO:0033238","GO:0060218","GO:0034612","GO:0044106","GO:0070482","GO:0071347","GO:0000502","GO:0002244","GO:0002833","GO:0071356","GO:0001736","GO:0101002","GO:0071453","GO:1905369","GO:1905368","GO:0048002","GO:0005839","GO:0001666","GO:0050851","GO:0060070","GO:0045088","GO:0090175","GO:0035567","GO:0019884","GO:0030177","GO:0042590","GO:0043…	["response to interleukin-1","negative regulation of mitotic cell cycle","regulation of DNA-templated transcription in response to stress","cellular response to hypoxia","regulation of cellular amine metabolic process","hematopoietic stem cell differentiation","response to tumor necrosis factor","cellular amine metabolic process","response to oxygen levels","cellular response to interleukin-1","p…	query	0.3333333333333333	1.4459224985540774E-4	1159.2451897781154	1124.0	-3874.0
H__sapiens__1_-781016	H__sapiens__1_-781016	EPHA2	EPHA2	P29317	ENSP00000351209	1969	NP_004422	NM_004431	ECK	-0.18124056415868153	0.8342346475986668	["GO:0097193","GO:0045216","GO:0043297","GO:0030099","GO:1905475","GO:1904377","GO:0043534","GO:0019199","GO:0061180","GO:1990778","GO:0070830","GO:0001525","GO:0005911","GO:1904375","GO:1901342","GO:0043010","GO:0004713","GO:0001503","GO:1902743","GO:0001763","GO:1901888","GO:0007409","GO:0002573","GO:0090596","GO:1903076","GO:0060491","GO:0090132","GO:0007043","GO:0048732","GO:0060443","GO:0051…	["intrinsic apoptotic signaling pathway","cell-cell junction organization","apical junction assembly","myeloid cell differentiation","regulation of protein localization to membrane","positive regulation of protein localization to cell periphery","blood vessel endothelial cell migration","transmembrane receptor protein kinase activity","mammary gland epithelium development","protein localization t…	query	0.3333333333333333	1.6869095816464237E-4	5304.477121334559	2068.0	-3874.0
H__sapiens__1_-787294	H__sapiens__1_-787294	GP5	GP5	P40197	ENSP00000383931	2814	NP_004479	NM_004488	CD42d	-0.10477794705251972	0.9005244644982185	["GO:0072376","GO:0007596","GO:0007599","GO:0050817","GO:0072378"]	["protein activation cascade","blood coagulation","hemostasis","coagulation","blood coagulation, fibrin clot formation"]	query	0.3333333333333333	1.4359563469270534E-4	798.7558969253407	841.0	-3874.0
H__sapiens__1_-773052	H__sapiens__1_-773052	CD22	CD22	P20273	ENSP00000482823	933	NP_001762	NM_001771	SIGLEC2	-0.1232924647853974	0.8840050843928626	["GO:0009306","GO:0042113","GO:0002701","GO:0043177","GO:0051048","GO:1903531","GO:0050848","GO:0050670","GO:0019902","GO:0002698","GO:0019722","GO:0070663","GO:0050864","GO:0050708","GO:0002792","GO:0048305","GO:0070661","GO:0002377","GO:0002637","GO:0002440","GO:0009986","GO:0046651","GO:0031406","GO:0051023","GO:0050851","GO:0050854","GO:0042100","GO:0002700","GO:0002791","GO:0044297","GO:0032…	["protein secretion","B cell activation","negative regulation of production of molecular mediator of immune response","organic acid binding","negative regulation of secretion","negative regulation of secretion by cell","regulation of calcium-mediated signaling","regulation of lymphocyte proliferation","phosphatase binding","negative regulation of immune effector process","calcium-mediated signali…	query	0.3333333333333333	1.463057790782736E-4	1069.218514116716	1004.0	-3874.0
H__sapiens__1_-780498	H__sapiens__1_-780498	LEF1	LEF1	Q9UJU2	ENSP00000427459	51176	NP_057353	NM_016269	TCF7L3	-0.1399577921195576	0.8693949299416611	["GO:0030852","GO:0032673","GO:0051817","GO:0045639","GO:0030217","GO:0051251","GO:0030099","GO:1903708","GO:0048524","GO:0005667","GO:0002286","GO:0061629","GO:0002761","GO:0018393","GO:0090575","GO:0002250","GO:0045621","GO:0045582","GO:0001837","GO:0046631","GO:0030851","GO:0035258","GO:0045619","GO:0032634","GO:1902105","GO:0001503","GO:1900120","GO:0051702","GO:0022409","GO:0050863","GO:0002…	["regulation of granulocyte differentiation","regulation of interleukin-4 production","modulation of process of other organism involved in symbiotic interaction","positive regulation of myeloid cell differentiation","T cell differentiation","positive regulation of lymphocyte activation","myeloid cell differentiation","positive regulation of hemopoiesis","positive regulation of viral process","tra…	query	0.3333333333333333	1.5607928827844546E-4	2770.5590305292067	1682.0	-3874.0
H__sapiens__1_-782326	H__sapiens__1_-782326	RASGRP3	RASGRP3	Q8IV61	ENSP00000409593	25780	NP_733772	NM_170672	KIAA0846	-0.15330263190038296	0.8578700636753063			query	0.3333333333333333	1.5532774153463808E-4	2287.8498596869995	1451.0	-3874.0
H__sapiens__1_-780885	H__sapiens__1_-780885	CARD14	CARD14	Q9BXL6	ENSP00000499145	79092	NP_438170	NM_052819	PSORS2	-0.07581816324457563	0.9269847511345927	["GO:0051091","GO:0032147","GO:0071356","GO:0038061","GO:0034612"]	["positive regulation of DNA-binding transcription factor activity","activation of protein kinase activity","cellular response to tumor necrosis factor","NIK/NF-kappaB signaling","response to tumor necrosis factor"]	query	0.3333333333333333	1.4289797084881395E-4	646.1775712769823	781.0	-3874.0
H__sapiens__1_-786350	H__sapiens__1_-786350	PLK3	PLK3	Q9H4B4	ENSP00000361275	1263	NP_004064	NM_004073	PRK	-0.13892751481974477	0.8702911093799459	["GO:0072422","GO:0048313","GO:0045930","GO:0000910","GO:0072413","GO:0071456","GO:0072331","GO:2000134","GO:0051222","GO:0070482","GO:2000058","GO:0048308","GO:0045732","GO:1902400","GO:1901800","GO:0042770","GO:0000075","GO:0071156","GO:0044773","GO:0071453","GO:1903362","GO:2000060","GO:0033157","GO:0006979","GO:0007093","GO:0044819","GO:0044774","GO:0045862","GO:0044783","GO:0001666","GO:1902…	["signal transduction involved in DNA damage checkpoint","Golgi inheritance","negative regulation of mitotic cell cycle","cytokinesis","signal transduction involved in mitotic cell cycle checkpoint","cellular response to hypoxia","signal transduction by p53 class mediator","negative regulation of G1/S transition of mitotic cell cycle","positive regulation of protein transport","response to oxygen…	query	0.3333333333333333	1.5269506794930523E-4	2050.184649949205	1332.0	-3874.0
H__sapiens__1_-773570	H__sapiens__1_-773570	WNT8A	WNT8A	Q9H1J5	ENSP00000426653	7478	NP_490645	NM_058244	WNT8D	-0.05356064089079596	0.9478484608859903	["GO:0055007","GO:0009952","GO:0051146","GO:0009798","GO:0061311","GO:0043009","GO:0042692","GO:0007507","GO:0048863","GO:0045165","GO:0035051","GO:0014706","GO:0007389","GO:0001664","GO:0060070","GO:0060485","GO:0048738","GO:0048762","GO:0009792","GO:0003002","GO:0060021","GO:0060537","GO:0001837"]	["cardiac muscle cell differentiation","anterior/posterior pattern specification","striated muscle cell differentiation","axis specification","cell surface receptor signaling pathway involved in heart development","chordate embryonic development","muscle cell differentiation","heart development","stem cell differentiation","cell fate commitment","cardiocyte differentiation","striated muscle tissu…	query	0.3333333333333333	1.452854859799506E-4	1179.9982760750768	912.0	-3874.0
H__sapiens__1_-786089	H__sapiens__1_-786089	CTSW	CTSW	P56202	ENSP00000436568	1521	NP_001326	NM_001335		-0.15601284073584654	0.8555482044319878	["GO:0034774"]	["secretory granule lumen"]	query	0.3333333333333333	1.5499070055796651E-4	2318.9707553760086	1370.0	-3874.0
H__sapiens__1_-778845	H__sapiens__1_-778845	ACKR4	ACKR4	Q9NPB9	ENSP00000425557	51554	NP_848540	NM_178445	VSHK1	-0.14027765447814067	0.8691168876988242	["GO:0001637","GO:0019956","GO:0019955","GO:0140375","GO:0004896","GO:0006874","GO:0001653","GO:0009986","GO:0004950","GO:0008528","GO:0051480","GO:0004930"]	["G protein-coupled chemoattractant receptor activity","chemokine binding","cytokine binding","immune receptor activity","cytokine receptor activity","cellular calcium ion homeostasis","peptide receptor activity","cell surface","chemokine receptor activity","G protein-coupled peptide receptor activity","regulation of cytosolic calcium ion concentration","G protein-coupled receptor activity"]	query	0.3333333333333333	1.6084928422068523E-4	3583.617640151718	1641.0	-3874.0
H__sapiens__1_-774714	H__sapiens__1_-774714	TRPM7	TRPM7	Q96QT4	ENSP00000495860	54822	NP_060142	NM_017672	TRP-PLIK	-0.05683768377127011	0.9447474047576181	["GO:0006816","GO:0072509","GO:0015085","GO:0097300","GO:0070265"]	["calcium ion transport","divalent inorganic cation transmembrane transporter activity","calcium ion transmembrane transporter activity","programmed necrotic cell death","necrotic cell death"]	query	0.3333333333333333	1.3709898546750753E-4	370.7204611477048	495.0	-3874.0
H__sapiens__1_-780341	H__sapiens__1_-780341	HADHB	HADHB	P55084	ENSP00000444295	3032	NP_001268442	NM_001281513	MTPB	-0.207440919990789	0.8126612523891265	["GO:0006631","GO:0044242","GO:0034440","GO:0046395","GO:0072329","GO:0016835","GO:0016042","GO:0016836","GO:0016614","GO:0019867","GO:0030258","GO:0032048","GO:0016829","GO:0046471","GO:0031968","GO:0019395","GO:0016616","GO:0009062","GO:0016054"]	["fatty acid metabolic process","cellular lipid catabolic process","lipid oxidation","carboxylic acid catabolic process","monocarboxylic acid catabolic process","carbon-oxygen lyase activity","lipid catabolic process","hydro-lyase activity","oxidoreductase activity, acting on CH-OH group of donors","outer membrane","lipid modification","cardiolipin metabolic process","lyase activity","phosphatidy…	query	0.3333333333333333	1.6897600540723216E-4	6474.30268462572	2220.0	-3874.0
H__sapiens__1_-775147	H__sapiens__1_-775147	PSMA6	PSMA6	P60900	ENSP00000485817	5687	NP_002782	NM_002791	PROS27	-0.06542561535667413	0.9366687179368611	["GO:0070555","GO:0045930","GO:0043620","GO:0071456","GO:0033238","GO:0060218","GO:0034612","GO:0044106","GO:0061629","GO:0070482","GO:0071347","GO:0000502","GO:0002244","GO:0002833","GO:0071356","GO:0001736","GO:0071453","GO:1905369","GO:0030016","GO:1905368","GO:0048002","GO:0005839","GO:0001666","GO:0050851","GO:0060070","GO:0045088","GO:0090175","GO:0035567","GO:0019884","GO:0030177","GO:0042…	["response to interleukin-1","negative regulation of mitotic cell cycle","regulation of DNA-templated transcription in response to stress","cellular response to hypoxia","regulation of cellular amine metabolic process","hematopoietic stem cell differentiation","response to tumor necrosis factor","cellular amine metabolic process","RNA polymerase II-specific DNA-binding transcription factor bindin…	query	0.3333333333333333	1.378169790518192E-4	434.4426097380333	741.0	-3874.0
H__sapiens__1_-775252	H__sapiens__1_-775252	PAK5	PAK5	Q9P286	ENSP00000367686	57144	NP_817127	NM_177990	PAK7	-0.11463399787310971	0.8916924455212392			query	0.3333333333333333	1.511258878645912E-4	1958.3768306384413	1294.0	-3874.0
H__sapiens__1_-790245	H__sapiens__1_-790245	SERPINB2	SERPINB2	P05120	ENSP00000402386	5055	NP_002566	NM_002575	PLANH2	-0.15768871438285592	0.854115614497585	["GO:0050818","GO:0061135","GO:0010466","GO:0061134","GO:1903034","GO:1900046","GO:0007596","GO:0051346","GO:0070671","GO:1900047","GO:0050817","GO:0004866","GO:0030193","GO:1903035","GO:0030195","GO:0030414","GO:0052548","GO:0061041","GO:0045861","GO:0050819","GO:0004857","GO:0052547","GO:0071349","GO:0007599","GO:0061045","GO:0032102"]	["regulation of coagulation","endopeptidase regulator activity","negative regulation of peptidase activity","peptidase regulator activity","regulation of response to wounding","regulation of hemostasis","blood coagulation","negative regulation of hydrolase activity","response to interleukin-12","negative regulation of hemostasis","coagulation","endopeptidase inhibitor activity","regulation of blo…	query	0.3333333333333333	1.636929120969062E-4	3922.9350893636283	1777.0	-3874.0
H__sapiens__1_-781689	H__sapiens__1_-781689	EBP	EBP	Q15125	ENSP00000417052	10682	NP_006570	NM_006579	CPXD	-0.14518395066374787	0.8648631863201154	["GO:1902653","GO:1902652","GO:0006695","GO:1901617","GO:0016860","GO:0008203","GO:0046165","GO:0006066","GO:0008202","GO:0016853","GO:0016125","GO:0016126","GO:0006694"]	["secondary alcohol biosynthetic process","secondary alcohol metabolic process","cholesterol biosynthetic process","organic hydroxy compound biosynthetic process","intramolecular oxidoreductase activity","cholesterol metabolic process","alcohol biosynthetic process","alcohol metabolic process","steroid metabolic process","isomerase activity","sterol metabolic process","sterol biosynthetic process…	query	0.3333333333333333	1.474491300501327E-4	1582.9283932146475	1085.0	-3874.0
H__sapiens__1_-784086	H__sapiens__1_-784086	KLKB1	KLKB1	P03952	ENSP00000426629	3818	NP_001305325	NM_001318396		-0.156255218296444	0.8553408638735884	["GO:0002673","GO:0050818","GO:0051917","GO:0051604","GO:1903317","GO:0010954","GO:1903034","GO:1900046","GO:0016485","GO:0072376","GO:0042730","GO:0007596","GO:1900047","GO:0050727","GO:0050817","GO:0030193","GO:1903035","GO:0072378","GO:0045862","GO:0030195","GO:0030198","GO:0061041","GO:0031638","GO:0070613","GO:0050819","GO:0007599","GO:0002526","GO:0061045","GO:0032102"]	["regulation of acute inflammatory response","regulation of coagulation","regulation of fibrinolysis","protein maturation","regulation of protein maturation","positive regulation of protein processing","regulation of response to wounding","regulation of hemostasis","protein processing","protein activation cascade","fibrinolysis","blood coagulation","negative regulation of hemostasis","regulation …	query	0.3333333333333333	1.589825119236884E-4	3421.0562742503294	1665.0	-3874.0
H__sapiens__1_-777664	H__sapiens__1_-777664	VPS4B	VPS4B	O75351	ENSP00000465944	9525	NP_004860	NM_004869	VPS4-2	-0.19627988887508357	0.8217821947928217	["GO:0000910","GO:0140014","GO:0048524","GO:0051048","GO:1903541","GO:1904896","GO:1902751","GO:1902186","GO:1902410","GO:0140112","GO:0016050","GO:0051701","GO:0046605","GO:0036257","GO:0007041","GO:0045921","GO:0070507","GO:0071985","GO:0019076","GO:0007052","GO:0090224","GO:0019068","GO:0032506","GO:0017157","GO:0007034","GO:1903900","GO:0032509","GO:0000819","GO:0051047","GO:0045787","GO:0044…	["cytokinesis","mitotic nuclear division","positive regulation of viral process","negative regulation of secretion","regulation of exosomal secretion","ESCRT complex disassembly","positive regulation of cell cycle G2/M phase transition","regulation of viral release from host cell","mitotic cytokinetic process","extracellular vesicle biogenesis","vesicle organization","interaction with host","regu…	query	0.3333333333333333	1.5467904098994585E-4	2730.4108410192766	1465.0	-3874.0
H__sapiens__1_-776407	H__sapiens__1_-776407	NDUFC1	NDUFC1	O43677	ENSP00000502731	4717	NP_002485	NM_002494	KFYI	-0.15689732912220852	0.8547918165386599	["GO:0010257","GO:0003955","GO:0022900","GO:0045271","GO:1990204","GO:0046034","GO:0033108","GO:0003954","GO:0098800","GO:0022904","GO:0042773","GO:0015980","GO:0098798","GO:0030964","GO:0098803","GO:0042775","GO:0005743","GO:0050136","GO:0005746","GO:0045333","GO:0070469","GO:0016655","GO:0016651","GO:0006119"]	["NADH dehydrogenase complex assembly","NAD(P)H dehydrogenase (quinone) activity","electron transport chain","respiratory chain complex I","oxidoreductase complex","ATP metabolic process","mitochondrial respiratory chain complex assembly","NADH dehydrogenase activity","inner mitochondrial membrane protein complex","respiratory electron transport chain","ATP synthesis coupled electron transport","…	query	0.3333333333333333	1.4409221902017292E-4	1339.8931617088206	968.0	-3874.0
H__sapiens__1_-785663	H__sapiens__1_-785663	PPM1D	PPM1D	O15297	ENSP00000486573	8493	NP_003611	NM_003620	Wip1	-0.19688697747306932	0.8212834515983065	["GO:0004721","GO:0006352","GO:0016791","GO:0006470","GO:0019901"]	["phosphoprotein phosphatase activity","DNA-templated transcription, initiation","phosphatase activity","protein dephosphorylation","protein kinase binding"]	query	0.3333333333333333	1.4916467780429595E-4	1738.5172334616364	1106.0	-3874.0
H__sapiens__1_-784556	H__sapiens__1_-784556	COX11	COX11	Q9Y6N1	ENSP00000461191	1353	NP_004366	NM_004375	COX11P	-0.13183650861025792	0.8764842809992347	["GO:0005743"]	["mitochondrial inner membrane"]	query	0.3333333333333333	1.378929950358522E-4	304.45512636300685	518.0	-3874.0
H__sapiens__1_-785190	H__sapiens__1_-785190	PPIP5K1	PPIP5K1	Q6PFW1	ENSP00000496290	9677	NP_055474	NM_014659	VIP1	-0.15272878072539095	0.8583624946968836	["GO:0043647","GO:1901617","GO:0019751","GO:0046173","GO:0016776","GO:0044262","GO:0046165","GO:0006066"]	["inositol phosphate metabolic process","organic hydroxy compound biosynthetic process","polyol metabolic process","polyol biosynthetic process","phosphotransferase activity, phosphate group as acceptor","cellular carbohydrate metabolic process","alcohol biosynthetic process","alcohol metabolic process"]	query	0.3333333333333333	1.529285823520416E-4	2873.682310740222	1390.0	-3874.0
H__sapiens__1_-773820	H__sapiens__1_-773820	MAOB	MAOB	P27338	ENSP00000367309	4129	NP_000889	NM_000898		-0.15817221992880928	0.8537027446815563	["GO:0019867","GO:0018958","GO:0007420","GO:0031968","GO:0072593","GO:1903409","GO:0030901","GO:0048857","GO:1901616"]	["outer membrane","phenol-containing compound metabolic process","brain development","organelle outer membrane","reactive oxygen species metabolic process","reactive oxygen species biosynthetic process","midbrain development","neural nucleus development","organic hydroxy compound catabolic process"]	query	0.3333333333333333	1.5666614444618518E-4	2593.074959019855	1551.0	-3874.0
H__sapiens__1_-777589	H__sapiens__1_-777589	CASQ2	CASQ2	O14958	ENSP00000261448	845	NP_001223	NM_001232	PDIB2	-0.17975999484935407	0.8354707046229312	["GO:0006942","GO:1903522","GO:0010880","GO:0006941","GO:0051282","GO:0051284","GO:1903514","GO:0010038","GO:0070588","GO:0060048","GO:0032412","GO:0051209","GO:0051208","GO:0032410","GO:0034766","GO:0019722","GO:0060314","GO:0043266","GO:0016528","GO:0071312","GO:0051592","GO:1901020","GO:0060402","GO:0090257","GO:0035637","GO:1904063","GO:0016529","GO:0060047","GO:0051279","GO:0030016","GO:0006…	["regulation of striated muscle contraction","regulation of blood circulation","regulation of release of sequestered calcium ion into cytosol by sarcoplasmic reticulum","striated muscle contraction","regulation of sequestering of calcium ion","positive regulation of sequestering of calcium ion","release of sequestered calcium ion into cytosol by endoplasmic reticulum","response to metal ion","cal…	query	0.3333333333333333	1.65371258475277E-4	4496.611242894132	1917.0	-3874.0
H__sapiens__1_-775092	H__sapiens__1_-775092	DAAM1	DAAM1	Q9Y4D1	ENSP00000450498	23002	NP_055807	NM_014992	KIAA0666	-0.16711905480188913	0.8460988732068999	["GO:0001738","GO:0001736","GO:0090175","GO:0035567","GO:0015629","GO:0007164","GO:2000027"]	["morphogenesis of a polarized epithelium","establishment of planar polarity","regulation of establishment of planar polarity","non-canonical Wnt signaling pathway","actin cytoskeleton","establishment of tissue polarity","regulation of animal organ morphogenesis"]	query	0.3333333333333333	1.550147263990079E-4	2509.8768615424397	1572.0	-3874.0
H__sapiens__1_-773507	H__sapiens__1_-773507	TRAF3IP2	TRAF3IP2	O43734	ENSP00000499070	10758	NP_679211	NM_147686	DKFZP586G0522	-0.12435579767020619	0.8830655923012294	["GO:0061659","GO:0007249","GO:0050691","GO:0051607","GO:0050688","GO:0004842","GO:0009615","GO:0043122","GO:0000209"]	["ubiquitin-like protein ligase activity","I-kappaB kinase/NF-kappaB signaling","regulation of defense response to virus by host","defense response to virus","regulation of defense response to virus","ubiquitin-protein transferase activity","response to virus","regulation of I-kappaB kinase/NF-kappaB signaling","protein polyubiquitination"]	query	0.3333333333333333	1.5269506794930523E-4	2079.996282047314	1368.0	-3874.0
H__sapiens__1_-785977	H__sapiens__1_-785977	CD8B	CD8B	P10966	ENSP00000394806	926	NP_757362	NM_172213	CD8B1	-0.08616049218225236	0.9174469763365052	["GO:0010008","GO:0005769","GO:0043235","GO:0042287","GO:0098802"]	["endosome membrane","early endosome","receptor complex","MHC protein binding","plasma membrane signaling receptor complex"]	query	0.3333333333333333	1.5082956259426848E-4	1854.4565040474133	1189.0	-3874.0
H__sapiens__1_-779060	H__sapiens__1_-779060	LAMA5	LAMA5	O15230	ENSP00000481814	3911	NP_005551	NM_005560		-0.18645974439617782	0.8298919690812518	["GO:0062023","GO:0007409","GO:0031589","GO:0005604","GO:0097485"]	["collagen-containing extracellular matrix","axonogenesis","cell-substrate adhesion","basement membrane","neuron projection guidance"]	query	0.3333333333333333	1.6652789342214822E-4	5291.188981250926	2000.0	-3874.0
H__sapiens__1_-781713	H__sapiens__1_-781713	FBXO25	FBXO25	Q8TCJ0	ENSP00000430191	26260	NP_904357	NM_183421	FBX25	-0.11351318668852976	0.892692424676613	["GO:0000151","GO:0031461"]	["ubiquitin ligase complex","cullin-RING ubiquitin ligase complex"]	query	0.3333333333333333	1.5239256324291374E-4	2427.07288566956	1331.0	-3874.0
H__sapiens__1_-777351	H__sapiens__1_-777351	NCF2	NCF2	P19878	ENSP00000407217	4688	NP_001177723	NM_001190794	p67phox	-0.17469252831609416	0.839715169717662	["GO:0005887","GO:0017048","GO:0002474","GO:0062197","GO:0045335","GO:0050664","GO:1990204","GO:0005767","GO:0019882","GO:0006979","GO:0072593","GO:0030139","GO:0048002","GO:0019884","GO:0006801","GO:0042590","GO:0016651","GO:0002478"]	["integral component of plasma membrane","Rho GTPase binding","antigen processing and presentation of peptide antigen via MHC class I","cellular response to chemical stress","phagocytic vesicle","oxidoreductase activity, acting on NAD(P)H, oxygen as acceptor","oxidoreductase complex","secondary lysosome","antigen processing and presentation","response to oxidative stress","reactive oxygen species…	query	0.3333333333333333	1.6345210853220007E-4	3631.3354254554783	1778.0	-3874.0
H__sapiens__1_-822218	H__sapiens__1_-822218	GDF2	GDF2	Q9UK05	ENSP00000463051	2658	NP_057288	NM_016204	BMP9	-0.129592409143646	0.878453407538253	["GO:0001935","GO:0050678","GO:0046916","GO:0050680","GO:0043534","GO:0051271","GO:0050679","GO:1901343","GO:0055072","GO:0001525","GO:1901342","GO:0040013","GO:0090100","GO:0071897","GO:0001763","GO:0030336","GO:0007178","GO:0060393","GO:0045926","GO:0090132","GO:0010633","GO:0032637","GO:0032677","GO:0001558","GO:0008285","GO:0071772","GO:0043542","GO:0001936","GO:0043535","GO:0001501","GO:0061…	["endothelial cell proliferation","regulation of epithelial cell proliferation","cellular transition metal ion homeostasis","negative regulation of epithelial cell proliferation","blood vessel endothelial cell migration","negative regulation of cellular component movement","positive regulation of epithelial cell proliferation","negative regulation of vasculature development","iron ion homeostasis…	query	0.3333333333333333	1.5787811809283233E-4	2886.0445471043454	1478.0	-3874.0
H__sapiens__1_-783673	H__sapiens__1_-783673	PDHA2	PDHA2	P29803	ENSP00000295266	5161	NP_005381	NM_005390	PDHAL	-0.156754327243508	0.8549140621147879	["GO:0006085","GO:0035383","GO:0009165","GO:0035384","GO:0071616","GO:0044272","GO:1990204","GO:0009260","GO:0006637","GO:0016903","GO:0033865","GO:0072522","GO:0006090","GO:0098798","GO:0046390","GO:0009152","GO:0033875","GO:1901293","GO:0034033","GO:0006084","GO:0034032","GO:0006164","GO:0033866","GO:0034030"]	["acetyl-CoA biosynthetic process","thioester metabolic process","nucleotide biosynthetic process","thioester biosynthetic process","acyl-CoA biosynthetic process","sulfur compound biosynthetic process","oxidoreductase complex","ribonucleotide biosynthetic process","acyl-CoA metabolic process","oxidoreductase activity, acting on the aldehyde or oxo group of donors","nucleoside bisphosphate metabo…	query	0.3333333333333333	1.6515276630883568E-4	5016.984175632287	1969.0	-3874.0
H__sapiens__1_-777662	H__sapiens__1_-777662	CSF3R	CSF3R	Q99062	ENSP00000435218	1441	NP_758519	NM_172313	GCSFR	-0.1866580506515614	0.8297274126293166	["GO:0019955","GO:0140375","GO:0009986"]	["cytokine binding","immune receptor activity","cell surface"]	query	0.3333333333333333	1.6883336147222692E-4	5221.999241409521	2185.0	-3874.0
H__sapiens__1_-811270	H__sapiens__1_-811270	TNFRSF6B	TNFRSF6B	O95407	ENSP00000359013	8771	NP_003814	NM_003823	TR6	-0.03123395488151003	0.9692487860631989	["GO:0071356","GO:0034612"]	["cellular response to tumor necrosis factor","response to tumor necrosis factor"]	query	0.3333333333333333	1.3217023526301876E-4	89.26321376997812	216.0	-3874.0
H__sapiens__1_-775334	H__sapiens__1_-775334	PRPS2	PRPS2	P11908	ENSP00000419380	5634	NP_002756	NM_002765		-0.19088434700295792	0.8262281383861967	["GO:0046390","GO:0061695","GO:0009165","GO:1901293","GO:0072522"]	["ribose phosphate biosynthetic process","transferase complex, transferring phosphorus-containing groups","nucleotide biosynthetic process","nucleoside phosphate biosynthetic process","purine-containing compound biosynthetic process"]	query	0.3333333333333333	1.5482272797646694E-4	2829.019521539833	1474.0	-3874.0
H__sapiens__1_-780527	H__sapiens__1_-780527	PLCZ1	PLCZ1	Q86YW0	ENSP00000497636	89869	NP_149114	NM_033123	PLCzeta	-0.07377153087118275	0.9288838908934511	["GO:0008081","GO:0019751","GO:0006874","GO:0007204","GO:0051480","GO:1901981","GO:0006066","GO:1902936","GO:0004620","GO:0004629","GO:0035091","GO:0048017","GO:0016298"]	["phosphoric diester hydrolase activity","polyol metabolic process","cellular calcium ion homeostasis","positive regulation of cytosolic calcium ion concentration","regulation of cytosolic calcium ion concentration","phosphatidylinositol phosphate binding","alcohol metabolic process","phosphatidylinositol bisphosphate binding","phospholipase activity","phospholipase C activity","phosphatidylinosi…	query	0.3333333333333333	1.463057790782736E-4	1392.4076200855814	1016.0	-3874.0
H__sapiens__1_-778726	H__sapiens__1_-778726	ZFP36		P26651	ENSP00000472329	7538	NP_003398	NM_003407	TIS11	-2.248959121168518	0.10550898949965526	["GO:0030099","GO:0050678","GO:0034612","GO:0060147","GO:0045682","GO:0019955","GO:0045604","GO:1904019","GO:0048545","GO:0070849","GO:0048525","GO:0071216","GO:0030218","GO:0043616","GO:0048872","GO:0060966","GO:0071774","GO:0045638","GO:0071383","GO:0071706","GO:1903706","GO:0051384","GO:0031098","GO:1904035","GO:1903555","GO:0045637","GO:0031330","GO:0071219","GO:0051348","GO:0050673","GO:0032…	["myeloid cell differentiation","regulation of epithelial cell proliferation","response to tumor necrosis factor","regulation of posttranscriptional gene silencing","regulation of epidermis development","cytokine binding","regulation of epidermal cell differentiation","epithelial cell apoptotic process","response to steroid hormone","response to epidermal growth factor","negative regulation of vi…	result	0.3333333333333333	1.5936254980079682E-4	2964.9619113578337	1625.0	-3874.0
H__sapiens__1_-775118	H__sapiens__1_-775118	TCL1A	TCL1A	P56279	ENSP00000452028	8115	NP_068801	NM_021966	TCL1	-0.16098348134768367	0.8513061334210383	["GO:0018209","GO:0019209","GO:0019887","GO:0019207","GO:0030295","GO:0042391","GO:0018105","GO:0033135","GO:0051881","GO:0034612"]	["peptidyl-serine modification","kinase activator activity","protein kinase regulator activity","kinase regulator activity","protein kinase activator activity","regulation of membrane potential","peptidyl-serine phosphorylation","regulation of peptidyl-serine phosphorylation","regulation of mitochondrial membrane potential","response to tumor necrosis factor"]	query	0.3333333333333333	1.5188335358444713E-4	1999.5824336401306	1217.0	-3874.0
H__sapiens__1_-789275	H__sapiens__1_-789275	THSD4	THSD4	Q6ZMP0	ENSP00000484438	79875	NP_079093	NM_024817	PRO34005	-0.1144820091451315	0.8918279830216069			query	0.3333333333333333	1.5403573629081948E-4	2216.166455433734	1456.0	-3874.0
H__sapiens__1_-783392	H__sapiens__1_-783392	TAMALIN	GRASP	Q7Z6J2	ENSP00000449492	160622	NP_859062	NM_181711	GRASP	-0.06483973225122712	0.9372176571054911			query	0.3333333333333333	1.5820281601012498E-4	3463.139569836227	1518.0	-3874.0
H__sapiens__1_-772758	H__sapiens__1_-772758	CYP51A1	CYP51A1	Q16850	ENSP00000406757	1595	NP_001139624	NM_001146152	P450L1	-0.06196237809644955	0.9399182476395715	["GO:1902653","GO:1902652","GO:0009306","GO:0006695","GO:0004497","GO:0008203","GO:1900221","GO:0106118","GO:0006066","GO:0051048","GO:1903531","GO:0016126","GO:0006694","GO:0050810","GO:0050708","GO:0002792","GO:0019218","GO:0046906","GO:1902930","GO:0019216","GO:1901617","GO:0097242","GO:0046890","GO:0046165","GO:0008202","GO:0016125","GO:0016705","GO:0090181","GO:0002791","GO:0016709","GO:0009…	["secondary alcohol biosynthetic process","secondary alcohol metabolic process","protein secretion","cholesterol biosynthetic process","monooxygenase activity","cholesterol metabolic process","regulation of amyloid-beta clearance","regulation of sterol biosynthetic process","alcohol metabolic process","negative regulation of secretion","negative regulation of secretion by cell","sterol biosynthet…	query	0.3333333333333333	1.4277555682467162E-4	1072.328904790807	899.0	-3874.0
H__sapiens__1_-776600	H__sapiens__1_-776600	FOXM1	FOXM1	Q08050	ENSP00000486536	2305	NP_973732	NM_202003	trident	-0.21687510674686683	0.8050305059054532	["GO:0032872","GO:0031098","GO:0043409","GO:0007568","GO:0090342","GO:0007569","GO:0070303","GO:0072331","GO:0072593","GO:0044839","GO:0051056","GO:0042772","GO:0007050","GO:0051054","GO:2001020","GO:0030330","GO:0070302","GO:2001022","GO:0051403","GO:0001933","GO:0042770","GO:0007265","GO:0006282"]	["regulation of stress-activated MAPK cascade","stress-activated protein kinase signaling cascade","negative regulation of MAPK cascade","aging","regulation of cell aging","cell aging","negative regulation of stress-activated protein kinase signaling cascade","signal transduction by p53 class mediator","reactive oxygen species metabolic process","cell cycle G2/M phase transition","regulation of s…	query	0.3333333333333333	1.5605493133583021E-4	3287.3006147091746	1507.0	-3874.0
H__sapiens__1_-779317	H__sapiens__1_-779317	PRKAA1	PRKAA1	Q13131	ENSP00000380317	5562	NP_996790	NM_206907	AMPKa1	-0.13584661439914505	0.8729765242486269	["GO:1902653","GO:1902652","GO:0006476","GO:0006695","GO:2000756","GO:0035601","GO:0045981","GO:0043405","GO:0072331","GO:0010038","GO:0055088","GO:1901983","GO:0050994","GO:0006109","GO:0071902","GO:1902930","GO:0010212","GO:0006110","GO:0046890","GO:0006979","GO:0048511","GO:0008202","GO:0006090","GO:0055081","GO:0018394","GO:0071326","GO:0046939","GO:0046034","GO:0042594","GO:0006757","GO:0090…	["secondary alcohol biosynthetic process","secondary alcohol metabolic process","protein deacetylation","cholesterol biosynthetic process","regulation of peptidyl-lysine acetylation","protein deacylation","positive regulation of nucleotide metabolic process","regulation of MAP kinase activity","signal transduction by p53 class mediator","response to metal ion","lipid homeostasis","regulation of p…	query	0.3333333333333333	1.4721036360959813E-4	1491.714532342239	1120.0	-3874.0
H__sapiens__1_-772848	H__sapiens__1_-772848	ITGAL	ITGAL	P20701	ENSP00000461006	3683	NP_002200	NM_002209	CD11A	-0.17664505734361546	0.8380772010849675	["GO:0005887","GO:0098742","GO:0072676","GO:0042581","GO:0050900","GO:0098802","GO:0002286","GO:0051668","GO:0008305","GO:0045123","GO:0031589","GO:0043235","GO:0030667","GO:0072678","GO:0098636","GO:0002285"]	["integral component of plasma membrane","cell-cell adhesion via plasma-membrane adhesion molecules","lymphocyte migration","specific granule","leukocyte migration","plasma membrane signaling receptor complex","T cell activation involved in immune response","localization within membrane","integrin complex","cellular extravasation","cell-substrate adhesion","receptor complex","secretory granule me…	query	0.3333333333333333	1.5693659761456373E-4	2760.852318938577	1587.0	-3874.0
H__sapiens__1_-786827	H__sapiens__1_-786827	CDC26	CDC26	Q8NHZ8	ENSP00000363322	246184	NP_644815	NM_139286	C9orf17	-0.07036418423171455	0.9320543186032533	["GO:0000152","GO:0000151","GO:0043161","GO:0031461","GO:0000209"]	["nuclear ubiquitin ligase complex","ubiquitin ligase complex","proteasome-mediated ubiquitin-dependent protein catabolic process","cullin-RING ubiquitin ligase complex","protein polyubiquitination"]	query	0.3333333333333333	1.441753171856978E-4	1141.868182336564	965.0	-3874.0
H__sapiens__1_-779071	H__sapiens__1_-779071	UBE2M	UBE2M	P61081	ENSP00000469855	9040	NP_003960	NM_003969	UBC12	-0.24996969922160872	0.7788243816988702	["GO:0061650","GO:0004842"]	["ubiquitin-like protein conjugating enzyme activity","ubiquitin-protein transferase activity"]	query	0.3333333333333333	1.5885623510722796E-4	3475.9567411442986	1697.0	-3874.0
H__sapiens__1_-782622	H__sapiens__1_-782622	SLC16A1	SLC16A1	P53985	ENSP00000486874	6566	NP_003042	NM_003051		-0.17888547512624178	0.836201659802982	["GO:0010232","GO:1901618","GO:0003018","GO:1903825","GO:0015850","GO:0045178","GO:0015849","GO:0046942","GO:1905039","GO:0008028","GO:0016323","GO:0015718","GO:0045177"]	["vascular transport","organic hydroxy compound transmembrane transporter activity","vascular process in circulatory system","organic acid transmembrane transport","organic hydroxy compound transport","basal part of cell","organic acid transport","carboxylic acid transport","carboxylic acid transmembrane transport","monocarboxylic acid transmembrane transporter activity","basolateral plasma membr…	query	0.3333333333333333	1.5928639694170118E-4	3628.4748115332727	1717.0	-3874.0
H__sapiens__1_-780467	H__sapiens__1_-780467	IL21	IL21	Q9HBE4	ENSP00000497915	59067	NP_068575	NM_021803	Za11	-0.13794521868320747	0.8711464129862927	["GO:0097696","GO:0042113","GO:0031343","GO:0030217","GO:0051251","GO:0070665","GO:0002699","GO:0042269","GO:0002286","GO:0018212","GO:0002313","GO:0007259","GO:0002449","GO:0050727","GO:0046631","GO:0002833","GO:0002703","GO:0071695","GO:0001906","GO:0001910","GO:0030183","GO:0009615","GO:0046651","GO:0022409","GO:0050863","GO:0045088","GO:0042100","GO:1903039","GO:0042509","GO:0002705","GO:0032…	["receptor signaling pathway via STAT","B cell activation","positive regulation of cell killing","T cell differentiation","positive regulation of lymphocyte activation","positive regulation of leukocyte proliferation","positive regulation of immune effector process","regulation of natural killer cell mediated cytotoxicity","T cell activation involved in immune response","peptidyl-tyrosine modific…	query	0.3333333333333333	1.6388069485414618E-4	4234.702435363675	1893.0	-3874.0
H__sapiens__1_-780836	H__sapiens__1_-780836	SKAP1	SKAP1	Q86WV1	ENSP00000464509	8631	NP_003717	NM_003726	SKAP55	-0.1851630197510395	0.8309688084815648	["GO:0033622","GO:0045785","GO:0098857","GO:0045121","GO:0002819","GO:0001952","GO:0033623","GO:0031334","GO:0034113","GO:0034114","GO:0022409","GO:0019902","GO:0050851","GO:0031589","GO:1903037","GO:0033628","GO:0007160","GO:0002250","GO:0010810","GO:0007159","GO:0010811","GO:0033627"]	["integrin activation","positive regulation of cell adhesion","membrane microdomain","membrane raft","regulation of adaptive immune response","regulation of cell-matrix adhesion","regulation of integrin activation","positive regulation of protein-containing complex assembly","heterotypic cell-cell adhesion","regulation of heterotypic cell-cell adhesion","positive regulation of cell-cell adhesion"…	query	0.3333333333333333	1.7041581458759374E-4	6078.938269709947	2304.0	-3874.0
H__sapiens__1_-785916	H__sapiens__1_-785916	IFNB1	IFNB1	P01574	ENSP00000369581	3456	NP_002167	NM_002176	IFNB	-0.15750507764274765	0.854272475907025	["GO:0071359","GO:0097696","GO:0042113","GO:0002701","GO:0030217","GO:0008374","GO:0002819","GO:0002704","GO:0035743","GO:0043065","GO:0045620","GO:0035456","GO:0007259","GO:0022408","GO:1903707","GO:2001233","GO:0002449","GO:0050868","GO:0002250","GO:0050817","GO:0002833","GO:0042092","GO:0045069","GO:0002703","GO:0043331","GO:0045619","GO:0002724","GO:0046425","GO:1902105","GO:0002823","GO:0048…	["cellular response to dsRNA","receptor signaling pathway via STAT","B cell activation","negative regulation of production of molecular mediator of immune response","T cell differentiation","O-acyltransferase activity","regulation of adaptive immune response","negative regulation of leukocyte mediated immunity","CD4-positive, alpha-beta T cell cytokine production","positive regulation of apoptoti…	query	0.3333333333333333	1.592356687898089E-4	3311.2644472020406	1595.0	-3874.0
H__sapiens__1_-776049	H__sapiens__1_-776049	CLDN15	CLDN15	P56746	ENSP00000481925	24146	NP_055158	NM_014343		-0.13808654085073455	0.8710233093858147	["GO:0120193","GO:0098742","GO:0045216","GO:0043297","GO:0070160","GO:0120192","GO:0005911","GO:0043296","GO:0007043"]	["tight junction organization","cell-cell adhesion via plasma-membrane adhesion molecules","cell-cell junction organization","apical junction assembly","tight junction","tight junction assembly","cell-cell junction","apical junction complex","cell-cell junction assembly"]	query	0.3333333333333333	1.5172204521316947E-4	2789.587536840083	1212.0	-3874.0
H__sapiens__1_-782976	H__sapiens__1_-782976	CD1C	CD1C	P29017	ENSP00000408755	911	NP_001756	NM_001765		-0.17104286295441326	0.8427854484231564	["GO:0031343","GO:0019882","GO:0002819","GO:0002709","GO:0002699","GO:0002711","GO:0002824","GO:0002706","GO:0001913","GO:0031341","GO:0002449","GO:0002250","GO:0002285","GO:0002703","GO:0042277","GO:0019883","GO:0001914","GO:0002456","GO:0003823","GO:0002821","GO:0001906","GO:0009986","GO:0001910","GO:0002822","GO:0002475","GO:0002708","GO:0001912","GO:0002460","GO:0019884","GO:0002705","GO:0001…	["positive regulation of cell killing","antigen processing and presentation","regulation of adaptive immune response","regulation of T cell mediated immunity","positive regulation of immune effector process","positive regulation of T cell mediated immunity","positive regulation of adaptive immune response based on somatic recombination of immune receptors built from immunoglobulin superfamily dom…	query	0.3333333333333333	1.5735641227380016E-4	2866.30076674469	1495.0	-3874.0
H__sapiens__1_-777869	H__sapiens__1_-777869	TNFRSF8	TNFRSF8	P28908	ENSP00000421938	943	NP_001268359	NM_001281430	KI-1	-0.19286162015066752	0.8245960737248266	["GO:0009612","GO:0071496","GO:0071356","GO:0032680","GO:1903557","GO:0071706","GO:0071214","GO:0104004","GO:1903555","GO:0032640","GO:0034612"]	["response to mechanical stimulus","cellular response to external stimulus","cellular response to tumor necrosis factor","regulation of tumor necrosis factor production","positive regulation of tumor necrosis factor superfamily cytokine production","tumor necrosis factor superfamily cytokine production","cellular response to abiotic stimulus","cellular response to environmental stimulus","regulat…	query	0.3333333333333333	1.726817475392851E-4	5898.190146805652	2061.0	-3874.0
H__sapiens__1_-785017	H__sapiens__1_-785017	CTNNB1	CTNNB1	P35222	ENSP00000496649	1499	NP_001895	NM_001904	CTNNB	-0.21146566853427765	0.8093970683634418	["GO:0061351","GO:0045216","GO:0030326","GO:0045930","GO:0031056","GO:0046332","GO:1905269","GO:2000696","GO:0007405","GO:1901216","GO:0048705","GO:0003158","GO:0043065","GO:0072001","GO:1902692","GO:0032479","GO:0072080","GO:0060560","GO:0001525","GO:0005911","GO:0098727","GO:0001837","GO:0051701","GO:0043009","GO:1903321","GO:0032606","GO:0050769","GO:0003007","GO:0006816","GO:0021953","GO:0060…	["neural precursor cell proliferation","cell-cell junction organization","embryonic limb morphogenesis","negative regulation of mitotic cell cycle","regulation of histone modification","SMAD binding","positive regulation of chromatin organization","regulation of epithelial cell differentiation involved in kidney development","neuroblast proliferation","positive regulation of neuron death","skelet…	query	0.3333333333333333	1.6572754391779913E-4	5289.8024633240175	2676.0	-3874.0
H__sapiens__1_-783615	H__sapiens__1_-783615	CAPN2	CAPN2	P17655	ENSP00000413158	824	NP_001739	NM_001748	mCANP	-0.16087740404804804	0.85139644246662	["GO:0001101","GO:0030198","GO:0098857","GO:0015629","GO:0043200","GO:0071229","GO:0030863","GO:0004197"]	["response to acid chemical","extracellular matrix organization","membrane microdomain","actin cytoskeleton","response to amino acid","cellular response to acid chemical","cortical cytoskeleton","cysteine-type endopeptidase activity"]	query	0.3333333333333333	1.5654351909830932E-4	2417.801003432116	1564.0	-3874.0
H__sapiens__1_-774202	H__sapiens__1_-774202	RAPGEF3	RAPGEF3	O95398	ENSP00000449905	10411	NP_006096	NM_006105	EPAC	-0.11912180417847731	0.8876996686477379	["GO:0009306","GO:0046824","GO:2000756","GO:0031056","GO:0003158","GO:0061647","GO:0051017","GO:0051222","GO:1901983","GO:0046683","GO:0098858","GO:0009914","GO:0001525","GO:0018393","GO:0051591","GO:0007265","GO:0030073","GO:1901342","GO:0060142","GO:0030072","GO:0110053","GO:0046822","GO:0033157","GO:0140253","GO:0032386","GO:0002791","GO:0030863","GO:0046879","GO:0061572","GO:0018394","GO:0110…	["protein secretion","positive regulation of nucleocytoplasmic transport","regulation of peptidyl-lysine acetylation","regulation of histone modification","endothelium development","histone H3-K9 modification","actin filament bundle assembly","positive regulation of protein transport","regulation of protein acetylation","response to organophosphorus","actin-based cell projection","hormone transpo…	query	0.3333333333333333	1.4703720041170417E-4	1065.065918115561	995.0	-3874.0
H__sapiens__1_-779380	H__sapiens__1_-779380	PTPRA	PTPRA	P18433	ENSP00000414089	5786	NP_543031	NM_080841	RPTPA	-0.15899971881356909	0.852996598820167	["GO:0016791","GO:0150116","GO:0001952","GO:0004721","GO:1901888","GO:0150115","GO:0007409","GO:0031589","GO:0007044","GO:0048041","GO:0097485","GO:0090109","GO:0007160","GO:0010810"]	["phosphatase activity","regulation of cell-substrate junction organization","regulation of cell-matrix adhesion","phosphoprotein phosphatase activity","regulation of cell junction assembly","cell-substrate junction organization","axonogenesis","cell-substrate adhesion","cell-substrate junction assembly","focal adhesion assembly","neuron projection guidance","regulation of cell-substrate junction…	query	0.3333333333333333	1.5060240963855423E-4	1883.548982588642	1277.0	-3874.0
H__sapiens__1_-775605	H__sapiens__1_-775605	HOMER2	HOMER2	Q9NSB8	ENSP00000454125	9455	NP_955362	NM_199330	Vesl-2	-0.14563934698278017	0.864469420475162	["GO:0032663","GO:0010959","GO:0007215","GO:0032279","GO:0097720","GO:0035254","GO:0098794","GO:0006816","GO:0050848","GO:0001664","GO:0048016","GO:0098984","GO:0098858","GO:0051924","GO:0019722","GO:0099572","GO:0001818","GO:0032623"]	["regulation of interleukin-2 production","regulation of metal ion transport","glutamate receptor signaling pathway","asymmetric synapse","calcineurin-mediated signaling","glutamate receptor binding","postsynapse","calcium ion transport","regulation of calcium-mediated signaling","G protein-coupled receptor binding","inositol phosphate-mediated signaling","neuron to neuron synapse","actin-based c…	query	0.3333333333333333	1.5475085112968121E-4	2655.7484111729177	1381.0	-3874.0
H__sapiens__1_-785453	H__sapiens__1_-785453	ITGAM	ITGAM	P11215	ENSP00000496959	3684	NP_001139280	NM_001145808	CR3A	-0.14029610031308148	0.8691008562600265	["GO:0042116","GO:0006909","GO:0043300","GO:0031343","GO:0090322","GO:1903307","GO:0043523","GO:0042581","GO:1901216","GO:1905475","GO:0033238","GO:0002699","GO:0150146","GO:0043065","GO:0044106","GO:0051222","GO:0008305","GO:0007420","GO:0043302","GO:0002269","GO:0003002","GO:0002703","GO:0050808","GO:0032928","GO:0033157","GO:0045921","GO:0001906","GO:0009986","GO:0001910","GO:0098802","GO:0010…	["macrophage activation","phagocytosis","regulation of leukocyte degranulation","positive regulation of cell killing","regulation of superoxide metabolic process","positive regulation of regulated secretory pathway","regulation of neuron apoptotic process","specific granule","positive regulation of neuron death","regulation of protein localization to membrane","regulation of cellular amine metabo…	query	0.3333333333333333	1.559332605644784E-4	2442.5709861556193	1600.0	-3874.0
H__sapiens__1_-773245	H__sapiens__1_-773245	ATP6V0A1	ATP6V0A1	Q93050	ENSP00000468177	535	NP_005168	NM_005177	VPP1	-0.15052988530557482	0.8602520207287394	["GO:0030641","GO:0055067","GO:0045851","GO:0045335","GO:0022804","GO:0015399","GO:0030004","GO:0051453","GO:0006826","GO:0042626","GO:0030139","GO:0043434","GO:0006885","GO:0030666","GO:0015078","GO:0019829","GO:0101002","GO:0051452","GO:1901653","GO:0016469","GO:0000041","GO:0033176","GO:0009678","GO:0032869","GO:0071375","GO:0032868","GO:0090382","GO:0022853","GO:0070820","GO:0010506","GO:0042…	["regulation of cellular pH","monovalent inorganic cation homeostasis","pH reduction","phagocytic vesicle","active transmembrane transporter activity","primary active transmembrane transporter activity","cellular monovalent inorganic cation homeostasis","regulation of intracellular pH","iron ion transport","ATPase-coupled transmembrane transporter activity","endocytic vesicle","response to peptid…	query	0.3333333333333333	1.559332605644784E-4	2772.1884067276646	1549.0	-3874.0
H__sapiens__1_-773183	H__sapiens__1_-773183	RRAGD	RRAGD	Q9NQL2	ENSP00000358423	58528	NP_067067	NM_021244	DKFZP761H171	-0.1594674729260406	0.8525976994538272	["GO:0031929","GO:0032549","GO:0043200","GO:0042594","GO:0032008","GO:0034198","GO:1903432","GO:0032550","GO:1990928","GO:0009267","GO:0032561","GO:0001882","GO:0032006","GO:0001883","GO:0071496","GO:0001101","GO:0031668","GO:0031669","GO:0043201","GO:0019001","GO:0031667","GO:0038202","GO:0010506","GO:0071229","GO:0009991","GO:0016236","GO:0071230"]	["TOR signaling","ribonucleoside binding","response to amino acid","response to starvation","positive regulation of TOR signaling","cellular response to amino acid starvation","regulation of TORC1 signaling","purine ribonucleoside binding","response to amino acid starvation","cellular response to starvation","guanyl ribonucleotide binding","nucleoside binding","regulation of TOR signaling","purin…	query	0.3333333333333333	1.575299306868305E-4	2737.27874167571	1488.0	-3874.0
H__sapiens__1_-790190	H__sapiens__1_-790190	SPN	SPN	P16150	ENSP00000498852	6693	NP_003114	NM_003123	LSN	-0.10011054474699792	0.9047373985409253	["GO:2000401","GO:0061756","GO:0030217","GO:0072676","GO:0002286","GO:0002360","GO:0032945","GO:0070664","GO:0002687","GO:0098858","GO:0022408","GO:0050868","GO:0002250","GO:0046631","GO:0030335","GO:0045058","GO:0002685","GO:0050900","GO:0009986","GO:2000404","GO:0046651","GO:0002295","GO:0050863","GO:0002460","GO:0051250","GO:0071706","GO:0032943","GO:0032944","GO:0008285","GO:0002287","GO:0002…	["regulation of lymphocyte migration","leukocyte adhesion to vascular endothelial cell","T cell differentiation","lymphocyte migration","T cell activation involved in immune response","T cell lineage commitment","negative regulation of mononuclear cell proliferation","negative regulation of leukocyte proliferation","positive regulation of leukocyte migration","actin-based cell projection","negati…	query	0.3333333333333333	1.4742739200943535E-4	1264.5840845781374	1041.0	-3874.0
H__sapiens__1_-774201	H__sapiens__1_-774201	CDC14A	CDC14A	Q9UNH5	ENSP00000496374	8556	NP_201570	NM_033313	DFNB32	-0.12215138687394754	0.8850143788005367	["GO:0004721","GO:0051302","GO:0007050","GO:0016791","GO:0045930","GO:0000910","GO:0098858","GO:0045787","GO:0140014","GO:0051301","GO:0090068"]	["phosphoprotein phosphatase activity","regulation of cell division","cell cycle arrest","phosphatase activity","negative regulation of mitotic cell cycle","cytokinesis","actin-based cell projection","positive regulation of cell cycle","mitotic nuclear division","cell division","positive regulation of cell cycle process"]	query	0.3333333333333333	1.484560570071259E-4	1654.9239395053598	1144.0	-3874.0
H__sapiens__1_-773427	H__sapiens__1_-773427	BCAR1	BCAR1	P56945	ENSP00000496719	9564	NP_055382	NM_014567	P130Cas	-0.053684539006045626	0.9477310315229328	["GO:0043542","GO:0030335","GO:1901653","GO:0010632","GO:0032869","GO:0071375","GO:0031252","GO:0043434","GO:0032868","GO:0050851","GO:0031532","GO:0010631","GO:0038127","GO:0090132","GO:0038179","GO:0010594","GO:0010634","GO:0090130"]	["endothelial cell migration","positive regulation of cell migration","cellular response to peptide","regulation of epithelial cell migration","cellular response to insulin stimulus","cellular response to peptide hormone stimulus","cell leading edge","response to peptide hormone","response to insulin","antigen receptor-mediated signaling pathway","actin cytoskeleton reorganization","epithelial ce…	query	0.3333333333333333	1.4461315979754158E-4	1048.3411704017128	982.0	-3874.0
H__sapiens__1_-777025	H__sapiens__1_-777025	GNAI2	GNAI2	P04899	ENSP00000406871	2771	NP_002061	NM_002070	GNAI2B	-0.2063682559922318	0.8135334325520891	["GO:0009898","GO:1905360","GO:0051339","GO:0019897","GO:0031280","GO:0007188","GO:0051350","GO:0019898","GO:0031279","GO:0098562","GO:0031667","GO:0031234","GO:0009991","GO:0007187","GO:0045761"]	["cytoplasmic side of plasma membrane","GTPase complex","regulation of lyase activity","extrinsic component of plasma membrane","negative regulation of cyclase activity","adenylate cyclase-modulating G protein-coupled receptor signaling pathway","negative regulation of lyase activity","extrinsic component of membrane","regulation of cyclase activity","cytoplasmic side of membrane","response to nu…	query	0.3333333333333333	1.7208742040956807E-4	6039.097170079342	2417.0	-3874.0
H__sapiens__1_-782053	H__sapiens__1_-782053	TIRAP	TIRAP	P58753	ENSP00000446213	114609	NP_683708	NM_148910	wyatt	-0.04734769706706322	0.9537557218651869	["GO:1990266","GO:0042113","GO:0032608","GO:0051251","GO:0070665","GO:0042742","GO:0002687","GO:0032615","GO:0032479","GO:0043122","GO:0072567","GO:0032147","GO:0030335","GO:0032606","GO:0030595","GO:0030593","GO:0002685","GO:0050900","GO:0050920","GO:0071216","GO:0032635","GO:1901981","GO:0046651","GO:0070304","GO:1902936","GO:0007254","GO:0042100","GO:0071706","GO:0032675","GO:0034135","GO:0032…	["neutrophil migration","B cell activation","interferon-beta production","positive regulation of lymphocyte activation","positive regulation of leukocyte proliferation","defense response to bacterium","positive regulation of leukocyte migration","interleukin-12 production","regulation of type I interferon production","regulation of I-kappaB kinase/NF-kappaB signaling","chemokine (C-X-C motif) lig…	query	0.3333333333333333	1.3995801259622114E-4	551.886765710215	687.0	-3874.0
H__sapiens__1_-774053	H__sapiens__1_-774053	CACNG4	CACNG4	Q9UBN1	ENSP00000262138	27092	NP_055220	NM_014405	MGC24983	-0.12410556329104121	0.8832865933213542	["GO:0005244","GO:0045211","GO:1903522","GO:0032279","GO:0005262","GO:0072509","GO:0032412","GO:1990778","GO:0022832","GO:0010469","GO:0098984","GO:1903539","GO:0022843","GO:0072665","GO:0051966","GO:0031623","GO:0043112","GO:0007041","GO:0030315","GO:0035637","GO:0061462","GO:0060047","GO:0098802","GO:0098657","GO:0098794","GO:0022898","GO:0072666","GO:0099601","GO:0034704","GO:0003015","GO:0050…	["voltage-gated ion channel activity","postsynaptic membrane","regulation of blood circulation","asymmetric synapse","calcium channel activity","divalent inorganic cation transmembrane transporter activity","regulation of ion transmembrane transporter activity","protein localization to cell periphery","voltage-gated channel activity","regulation of signaling receptor activity","neuron to neuron s…	query	0.3333333333333333	1.4912019087384433E-4	2032.3955434146937	1141.0	-3874.0
H__sapiens__1_-824522	H__sapiens__1_-824522	NDUFA7	NDUFA7	O95182	ENSP00000471943	4701	NP_004992	NM_005001	B14.5a	-0.16786706951258276	0.8454662154511929	["GO:0010257","GO:0003955","GO:0022900","GO:0045271","GO:1990204","GO:0046034","GO:0033108","GO:0003954","GO:0098800","GO:0022904","GO:0042773","GO:0015980","GO:0098798","GO:0030964","GO:0098803","GO:0042775","GO:0005743","GO:0050136","GO:0005746","GO:0045333","GO:0070469","GO:0016655","GO:0016651","GO:0006119"]	["NADH dehydrogenase complex assembly","NAD(P)H dehydrogenase (quinone) activity","electron transport chain","respiratory chain complex I","oxidoreductase complex","ATP metabolic process","mitochondrial respiratory chain complex assembly","NADH dehydrogenase activity","inner mitochondrial membrane protein complex","respiratory electron transport chain","ATP synthesis coupled electron transport","…	query	0.3333333333333333	1.464986815118664E-4	1994.690756066523	1106.0	-3874.0
H__sapiens__1_-776249	H__sapiens__1_-776249	GIT1	GIT1	Q9Y2X7	ENSP00000466824	28964	NP_054749	NM_014030		-0.16139910651491562	0.8509523826859162	["GO:0051302","GO:0000910","GO:0051301"]	["regulation of cell division","cytokinesis","cell division"]	query	0.3333333333333333	1.6534391534391533E-4	4793.944580594283	1813.0	-3874.0
H__sapiens__1_-776548	H__sapiens__1_-776548	TCIRG1	TCIRG1	Q13488	ENSP00000436082	10312	NP_006044	NM_006053	TIRC7	-0.17756475987552126	0.8373067736975123	["GO:0030641","GO:0055067","GO:0045851","GO:0045335","GO:0022804","GO:0015399","GO:0030004","GO:0051453","GO:0006826","GO:0042626","GO:0030139","GO:0043434","GO:0006885","GO:0030666","GO:0015078","GO:0019829","GO:0045177","GO:0101002","GO:0051452","GO:1901653","GO:0016469","GO:0000041","GO:0033176","GO:0009678","GO:0032869","GO:0071375","GO:0032868","GO:0090382","GO:0022853","GO:0070820","GO:0042…	["regulation of cellular pH","monovalent inorganic cation homeostasis","pH reduction","phagocytic vesicle","active transmembrane transporter activity","primary active transmembrane transporter activity","cellular monovalent inorganic cation homeostasis","regulation of intracellular pH","iron ion transport","ATPase-coupled transmembrane transporter activity","endocytic vesicle","response to peptid…	query	0.3333333333333333	1.637465203864418E-4	4310.85680738758	1694.0	-3874.0
H__sapiens__1_-776945	H__sapiens__1_-776945	SKP1	SKP1	P63208	ENSP00000431067	6500	NP_733779	NM_170679	TCEB1L	-0.12964861776727005	0.8784040322689683	["GO:1901991","GO:0031098","GO:0070555","GO:0010390","GO:0051443","GO:0045930","GO:0060090","GO:0046916","GO:0033522","GO:1903322","GO:0044839","GO:0031461","GO:0031396","GO:0031398","GO:0002220","GO:0045185","GO:0071347","GO:1903320","GO:0055076","GO:0055072","GO:0000151","GO:0002833","GO:0002758","GO:1902750","GO:0000086","GO:1902749","GO:0016574","GO:0045089","GO:1904666","GO:1901988","GO:0038…	["negative regulation of mitotic cell cycle phase transition","stress-activated protein kinase signaling cascade","response to interleukin-1","histone monoubiquitination","positive regulation of ubiquitin-protein transferase activity","negative regulation of mitotic cell cycle","molecular adaptor activity","cellular transition metal ion homeostasis","histone H2A ubiquitination","positive regulati…	query	0.3333333333333333	1.455604075691412E-4	1317.5304723966067	1132.0	-3874.0
H__sapiens__1_-779226	H__sapiens__1_-779226	CA6	CA6	P23280	ENSP00000447108	765	NP_001257431	NM_001270502		-0.15068564089384454	0.8601180421034212	["GO:0016829","GO:0016835","GO:0016836"]	["lyase activity","carbon-oxygen lyase activity","hydro-lyase activity"]	query	0.3333333333333333	1.5144631228229593E-4	1971.018660686528	1241.0	-3874.0
H__sapiens__1_-780183	H__sapiens__1_-780183	TJAP1	TJAP1	Q5JTD0	ENSP00000484142	93643	NP_542171	NM_080604	TJP4	-0.12112233557294459	0.8859255727506988			query	0.3333333333333333	1.488316713796696E-4	1876.8085711310698	1108.0	-3874.0
H__sapiens__1_-789233	H__sapiens__1_-789233	USP7	USP7	Q93009	ENSP00000501290	7874	NP_003461	NM_003470	HAUSP	-0.16476853244169173	0.8480899866889569	["GO:0044389","GO:0007623","GO:0070646","GO:0031330","GO:0010906","GO:2000058","GO:0006109","GO:0005996","GO:0033044","GO:0046364","GO:0061136","GO:1903362","GO:0043433","GO:0019318","GO:0031647","GO:0043255","GO:0048511","GO:0016051","GO:0051054","GO:0032434","GO:0006006","GO:0045861","GO:0006094","GO:1903050","GO:0019319","GO:0010675","GO:0009895","GO:0043161","GO:0044262","GO:0016233"]	["ubiquitin-like protein ligase binding","circadian rhythm","protein modification by small protein removal","negative regulation of cellular catabolic process","regulation of glucose metabolic process","regulation of ubiquitin-dependent protein catabolic process","regulation of carbohydrate metabolic process","monosaccharide metabolic process","regulation of chromosome organization","monosacchari…	query	0.3333333333333333	1.4452955629426219E-4	1104.0591307687807	998.0	-3874.0
H__sapiens__1_-788780	H__sapiens__1_-788780	PBX1	PBX1	P40424	ENSP00000485692	5087	NP_002576	NM_002585		-0.1666945161394004	0.8464581511491568	["GO:0150063","GO:0048880","GO:0045944","GO:0019827","GO:0098727","GO:0007423","GO:0005667","GO:0007219"]	["visual system development","sensory system development","positive regulation of transcription by RNA polymerase II","stem cell population maintenance","maintenance of cell number","sensory organ development","transcription regulator complex","Notch signaling pathway"]	query	0.3333333333333333	1.6622340425531914E-4	5481.797458423181	2234.0	-3874.0
H__sapiens__1_-775553	H__sapiens__1_-775553	ELOB	TCEB2	Q15370	ENSP00000458443	6923	NP_996896	NM_207013	TCEB2	-0.15606003841510696	0.8555078254951467	["GO:1903052","GO:0071453","GO:0061136","GO:0044389","GO:1903362","GO:0043620","GO:2000060","GO:0071456","GO:0043618","GO:0036294","GO:0031461","GO:0045862","GO:0001666","GO:0032434","GO:0070482","GO:0036293","GO:1903050","GO:2000058","GO:0000151","GO:0045732","GO:0043161","GO:1901800","GO:1903364"]	["positive regulation of proteolysis involved in cellular protein catabolic process","cellular response to oxygen levels","regulation of proteasomal protein catabolic process","ubiquitin-like protein ligase binding","regulation of cellular protein catabolic process","regulation of DNA-templated transcription in response to stress","positive regulation of ubiquitin-dependent protein catabolic proc…	query	0.3333333333333333	1.4168319637291018E-4	874.6972998700069	849.0	-3874.0
H__sapiens__1_-772958	H__sapiens__1_-772958	MGST1	MGST1	P10620	ENSP00000442970	4257	NP_665735	NM_145792	MGST-I	-0.07756063388735654	0.9253709138598001	["GO:0005766","GO:0062197","GO:0044272","GO:0005777","GO:0009410","GO:0006979","GO:0034599","GO:0005765","GO:1901685","GO:0016765","GO:0016209","GO:0042582","GO:0004601","GO:0042579","GO:0016684","GO:0030667","GO:0071466"]	["primary lysosome","cellular response to chemical stress","sulfur compound biosynthetic process","peroxisome","response to xenobiotic stimulus","response to oxidative stress","cellular response to oxidative stress","lysosomal membrane","glutathione derivative metabolic process","transferase activity, transferring alkyl or aryl (other than methyl) groups","antioxidant activity","azurophil granule…	query	0.3333333333333333	1.5073861923424781E-4	1850.7636854318168	1306.0	-3874.0
H__sapiens__1_-772926	H__sapiens__1_-772926	CACNA2D2	CACNA2D2	Q9NY47	ENSP00000418081	9254	NP_006021	NM_006030	KIAA0558	-0.1790581693353283	0.83605726508713	["GO:0005244","GO:0009306","GO:0030072","GO:1903522","GO:0008016","GO:0035637","GO:0060047","GO:1990351","GO:0005262","GO:0072509","GO:0034704","GO:0015085","GO:0003015","GO:0022832","GO:1902495","GO:0002791","GO:0009914","GO:0050708","GO:0046879","GO:0022843","GO:0090276","GO:0046883","GO:0030073"]	["voltage-gated ion channel activity","protein secretion","peptide hormone secretion","regulation of blood circulation","regulation of heart contraction","multicellular organismal signaling","heart contraction","transporter complex","calcium channel activity","divalent inorganic cation transmembrane transporter activity","calcium channel complex","calcium ion transmembrane transporter activity","…	query	0.3333333333333333	1.6297262059973924E-4	4310.7328585271625	1722.0	-3874.0
H__sapiens__1_-781275	H__sapiens__1_-781275	RALB	RALB	P11234	ENSP00000487037	5899	NP_002872	NM_002881		-0.16219145462191967	0.8502783992263651	["GO:0071359","GO:0022406","GO:0044088","GO:0032549","GO:0044389","GO:0042594","GO:0140029","GO:0051100","GO:0000045","GO:0043393","GO:0016241","GO:1905037","GO:0032550","GO:0051098","GO:0016239","GO:0032561","GO:0001882","GO:0010508","GO:0001883","GO:0071496","GO:2000785","GO:0043331","GO:0031668","GO:0048278","GO:0051099","GO:0044090","GO:0031669","GO:0019001","GO:0007033","GO:0031667","GO:0010…	["cellular response to dsRNA","membrane docking","regulation of vacuole organization","ribonucleoside binding","ubiquitin-like protein ligase binding","response to starvation","exocytic process","negative regulation of binding","autophagosome assembly","regulation of protein binding","regulation of macroautophagy","autophagosome organization","purine ribonucleoside binding","regulation of binding…	query	0.3333333333333333	1.6350555918901244E-4	4070.2987321819814	1877.0	-3874.0
H__sapiens__1_-773881	H__sapiens__1_-773881	ATP2B1	ATP2B1	P20020	ENSP00000489171	490	NP_001673	NM_001682	PMCA1	-0.16688146558017694	0.8462999210621327	["GO:0035296","GO:1903522","GO:0015399","GO:0097756","GO:0070588","GO:0072509","GO:0030278","GO:0140115","GO:0110149","GO:0019829","GO:0097746","GO:0003018","GO:0030500","GO:0031214","GO:0030282","GO:1901653","GO:0090257","GO:0035637","GO:0043270","GO:0001503","GO:0060047","GO:0110148","GO:0071375","GO:0006937","GO:0006816","GO:0003015","GO:0022853","GO:0045778","GO:0006940","GO:0110151","GO:0008…	["regulation of tube diameter","regulation of blood circulation","primary active transmembrane transporter activity","negative regulation of blood vessel diameter","calcium ion transmembrane transport","divalent inorganic cation transmembrane transporter activity","regulation of ossification","export across plasma membrane","regulation of biomineralization","ATPase-coupled cation transmembrane tr…	query	0.3333333333333333	1.5903307888040714E-4	3253.109403468429	1786.0	-3874.0
H__sapiens__1_-777583	H__sapiens__1_-777583	MYL12B	MYL12B	O14950	ENSP00000496809	103910	NP_291024	NM_033546		-0.16712510682118586	0.8460937526156873			query	0.3333333333333333	1.599488163787588E-4	3987.844005326881	1572.0	-3874.0
H__sapiens__1_-788776	H__sapiens__1_-788776	PCGF3	PCGF3	Q3KNV8	ENSP00000479441	10336	NP_006306	NM_006315	RNF3A	-0.1413674487458797	0.8681702450131912	["GO:0010390","GO:0006513","GO:0000152","GO:0016574","GO:0000151","GO:0033522"]	["histone monoubiquitination","protein monoubiquitination","nuclear ubiquitin ligase complex","histone ubiquitination","ubiquitin ligase complex","histone H2A ubiquitination"]	query	0.3333333333333333	1.4405070584845865E-4	1558.1015521788934	891.0	-3874.0
H__sapiens__1_-783285	H__sapiens__1_-783285	LMNA	LMNA	P02545	ENSP00000502798	4000	NP_733822	NM_170708	LMN1	-0.170058027555346	0.8436158622099106	["GO:0014887","GO:0035966","GO:0007163","GO:0034976","GO:0090342","GO:0007569","GO:0036294","GO:0003300","GO:0043500","GO:0010611","GO:0070482","GO:0043502","GO:0014896","GO:0035967","GO:0014741","GO:0071453","GO:0034620","GO:0007568","GO:0014897","GO:0090257","GO:0014888","GO:0006986","GO:0001666","GO:0036293","GO:0003299","GO:0030968","GO:0014743"]	["cardiac muscle adaptation","response to topologically incorrect protein","establishment or maintenance of cell polarity","response to endoplasmic reticulum stress","regulation of cell aging","cell aging","cellular response to decreased oxygen levels","cardiac muscle hypertrophy","muscle adaptation","regulation of cardiac muscle hypertrophy","response to oxygen levels","regulation of muscle adap…	query	0.3333333333333333	1.5229972586049346E-4	1956.8658769618996	1367.0	-3874.0
H__sapiens__1_-782742	H__sapiens__1_-782742	PPP2R2B	PPP2R2B	Q00005	ENSP00000434497	5521	NP_858064	NM_181678	SCA12	-0.15809026143597188	0.8537727157391636	["GO:0019867","GO:0031968","GO:0019208","GO:0006470","GO:0008287","GO:1903293"]	["outer membrane","organelle outer membrane","phosphatase regulator activity","protein dephosphorylation","protein serine/threonine phosphatase complex","phosphatase complex"]	query	0.3333333333333333	1.5342129487572875E-4	2268.502659468689	1458.0	-3874.0
H__sapiens__1_-792719	H__sapiens__1_-792719	HLA-G	HLA-G	P17693	ENSP00000484084	3135	NP_002118	NM_002127		-0.1421188161426825	0.8675181751988907	["GO:0090343","GO:0051251","GO:0002716","GO:0002699","GO:0043065","GO:0032945","GO:0070664","GO:0002702","GO:0002483","GO:0001525","GO:0022408","GO:0002449","GO:0050868","GO:1904019","GO:0045621","GO:0002703","GO:0045619","GO:0019883","GO:0001914","GO:0007568","GO:1904037","GO:0097028","GO:0030133","GO:0002821","GO:0002823","GO:0031348","GO:0009986","GO:0001910","GO:0002710","GO:0050863","GO:0031…	["positive regulation of cell aging","positive regulation of lymphocyte activation","negative regulation of natural killer cell mediated immunity","positive regulation of immune effector process","positive regulation of apoptotic process","negative regulation of mononuclear cell proliferation","negative regulation of leukocyte proliferation","positive regulation of production of molecular mediato…	query	0.3333333333333333	1.5250876925423213E-4	1886.1014215386388	1344.0	-3874.0
H__sapiens__1_-776042	H__sapiens__1_-776042	SERPINE1	SERPINE1	P05121	ENSP00000223095	5054	NP_000593	NM_000602	PLANH1	-0.13856852538659603	0.8706035907773806	["GO:0014910","GO:0061135","GO:0031091","GO:0030100","GO:2001234","GO:0042742","GO:0002687","GO:0001525","GO:0008625","GO:2001237","GO:1904019","GO:0007596","GO:0051346","GO:1900047","GO:0050817","GO:0040013","GO:0030335","GO:0048259","GO:0007568","GO:0050900","GO:0050920","GO:0071216","GO:0048511","GO:0050819","GO:1904036","GO:0032102","GO:0002065","GO:0050729","GO:0010466","GO:0097191","GO:1903…	["regulation of smooth muscle cell migration","endopeptidase regulator activity","platelet alpha granule","regulation of endocytosis","negative regulation of apoptotic signaling pathway","defense response to bacterium","positive regulation of leukocyte migration","angiogenesis","extrinsic apoptotic signaling pathway via death domain receptors","negative regulation of extrinsic apoptotic signaling…	query	0.3333333333333333	1.5424957581366652E-4	1919.784928150952	1431.0	-3874.0
H__sapiens__1_-776665	H__sapiens__1_-776665	GNB3	GNB3	P16520	ENSP00000501677	2784	NP_002066	NM_002075		-0.17968605462385978	0.8355324817991059	["GO:0009898","GO:1902652","GO:0032535","GO:0008203","GO:0007626","GO:0006066","GO:0019898","GO:0006638","GO:0098562","GO:0031234","GO:0006641","GO:0006109","GO:0005996","GO:0019218","GO:0019216","GO:0006639","GO:1905360","GO:0019897","GO:0019318","GO:0045444","GO:0008202","GO:0016125","GO:0006006","GO:0042445","GO:0010675","GO:0050795","GO:0007610","GO:0044262","GO:0008361"]	["cytoplasmic side of plasma membrane","secondary alcohol metabolic process","regulation of cellular component size","cholesterol metabolic process","locomotory behavior","alcohol metabolic process","extrinsic component of membrane","neutral lipid metabolic process","cytoplasmic side of membrane","extrinsic component of cytoplasmic side of plasma membrane","triglyceride metabolic process","regula…	query	0.3333333333333333	1.6594756057085962E-4	4712.7277330575	1979.0	-3874.0
H__sapiens__1_-773777	H__sapiens__1_-773777	MEF2A	MEF2A	Q02078	ENSP00000454120	4205	NP_005578	NM_005587	RSRFC9	-0.1505996430757696	0.8601920135589753	["GO:0055007","GO:0055006","GO:0051146","GO:0071248","GO:1903522","GO:0042692","GO:0008016","GO:0016358","GO:0010038","GO:0035051","GO:0014706","GO:0030239","GO:0003300","GO:0043500","GO:0010611","GO:0043502","GO:0071241","GO:0051147","GO:0014896","GO:0051592","GO:0007507","GO:0055002","GO:0014897","GO:0090257","GO:0035637","GO:0055013","GO:0014742","GO:0060047","GO:0055001","GO:0003015","GO:0048…	["cardiac muscle cell differentiation","cardiac cell development","striated muscle cell differentiation","cellular response to metal ion","regulation of blood circulation","muscle cell differentiation","regulation of heart contraction","dendrite development","response to metal ion","cardiocyte differentiation","striated muscle tissue development","myofibril assembly","cardiac muscle hypertrophy",…	query	0.3333333333333333	1.537042729787888E-4	3132.6101317740067	1476.0	-3874.0
H__sapiens__1_-795260	H__sapiens__1_-795260	SIPA1	SIPA1	Q96FS4	ENSP00000436683	6494	NP_694985	NM_153253	SPA1	-0.18527537916633222	0.8308754465572612	["GO:0045926","GO:0001558","GO:0043087"]	["negative regulation of growth","regulation of cell growth","regulation of GTPase activity"]	query	0.3333333333333333	1.6423057973394647E-4	4327.895795878823	1785.0	-3874.0
H__sapiens__1_-773630	H__sapiens__1_-773630	CTSA	CTSA	P10619	ENSP00000493613	5476	NP_001161066	NM_001167594	PPGB	-0.18147959242869596	0.834035265763962	["GO:0061684","GO:0006643","GO:0005766","GO:0005765","GO:0031330","GO:0042582","GO:0010507","GO:0008236","GO:0034774","GO:0010506","GO:0009895","GO:0006665","GO:0098576","GO:0005775"]	["chaperone-mediated autophagy","membrane lipid metabolic process","primary lysosome","lysosomal membrane","negative regulation of cellular catabolic process","azurophil granule","negative regulation of autophagy","serine-type peptidase activity","secretory granule lumen","regulation of autophagy","negative regulation of catabolic process","sphingolipid metabolic process","lumenal side of membran…	query	0.3333333333333333	1.6504373659019642E-4	4407.589577732476	1846.0	-3874.0
H__sapiens__1_-778693	H__sapiens__1_-778693	TICAM1	TICAM1	Q8IUC6	ENSP00000479467	148022	NP_891549	NM_182919	TICAM-1	-0.12373566822124919	0.8836133771115676	["GO:0051091","GO:0055094","GO:0051251","GO:0050729","GO:0002367","GO:0097300","GO:0002696","GO:0002699","GO:0002221","GO:0071219","GO:0002718","GO:0002702","GO:1900015","GO:0032496","GO:0032814","GO:0007249","GO:0050867","GO:0061081","GO:0002237","GO:0070265","GO:0030101","GO:0043122","GO:0050727","GO:0002703","GO:0043331","GO:0002532","GO:0062207","GO:0034122","GO:0061082","GO:0002440","GO:0071…	["positive regulation of DNA-binding transcription factor activity","response to lipoprotein particle","positive regulation of lymphocyte activation","positive regulation of inflammatory response","cytokine production involved in immune response","programmed necrotic cell death","positive regulation of leukocyte activation","positive regulation of immune effector process","pattern recognition rec…	query	0.3333333333333333	1.569612305760477E-4	2834.6585428354547	1460.0	-3874.0
H__sapiens__1_-784979	H__sapiens__1_-784979	CYP7A1	CYP7A1	P22680	ENSP00000301645	1581	NP_000771	NM_000780	CYP7	-0.16534601943895022	0.8476003671372082	["GO:1902652","GO:0042593","GO:0004497","GO:0008203","GO:0097306","GO:0016042","GO:0009746","GO:0055088","GO:0036314","GO:0008206","GO:0006066","GO:0006694","GO:0050810","GO:0009743","GO:0046164","GO:0006699","GO:0008395","GO:0072330","GO:1904251","GO:0019218","GO:0046394","GO:0019216","GO:0016053","GO:0071331","GO:1901617","GO:0055092","GO:0042180","GO:0009749","GO:0046890","GO:0001678","GO:0006…	["secondary alcohol metabolic process","glucose homeostasis","monooxygenase activity","cholesterol metabolic process","cellular response to alcohol","lipid catabolic process","response to hexose","lipid homeostasis","response to sterol","bile acid metabolic process","alcohol metabolic process","steroid biosynthetic process","regulation of steroid biosynthetic process","response to carbohydrate","…	query	0.3333333333333333	1.6305233980107615E-4	4700.288406502322	1869.0	-3874.0
H__sapiens__1_-773531	H__sapiens__1_-773531	ATP2B4	ATP2B4	P23634	ENSP00000433577	493	NP_001675	NM_001684	PMCA4	-0.11967922774618121	0.8872049818192482	["GO:0010232","GO:0019903","GO:1903522","GO:0071868","GO:0015399","GO:0007188","GO:0008277","GO:0070588","GO:0006809","GO:0044106","GO:0009065","GO:0006525","GO:0001525","GO:0014741","GO:1904375","GO:0071902","GO:0016053","GO:0071870","GO:0040013","GO:0003018","GO:0090257","GO:0044853","GO:0014888","GO:0060047","GO:0006816","GO:0031674","GO:0048016","GO:0022853","GO:0051354","GO:0090132","GO:2000…	["vascular transport","protein phosphatase binding","regulation of blood circulation","cellular response to monoamine stimulus","primary active transmembrane transporter activity","adenylate cyclase-modulating G protein-coupled receptor signaling pathway","regulation of G protein-coupled receptor signaling pathway","calcium ion transmembrane transport","nitric oxide biosynthetic process","cellula…	query	0.3333333333333333	1.5669069257286117E-4	2542.6257358208686	1552.0	-3874.0
H__sapiens__1_-775880	H__sapiens__1_-775880	PPP2R1A	PPP2R1A	P30153	ENSP00000485914	5518	NP_055040	NM_014225	PR65A	-0.2302888186310257	0.7943041595312526	["GO:0043409","GO:0097696","GO:0022406","GO:0006643","GO:0043405","GO:0007260","GO:0044839","GO:0008287","GO:1903293","GO:0004721","GO:0050730","GO:0051348","GO:0018212","GO:0019208","GO:0071901","GO:0001933","GO:0050732","GO:0007259","GO:0006665","GO:0016791","GO:0000086","GO:0033673","GO:0006469","GO:0018108","GO:1902749","GO:0043407","GO:0003823","GO:0046425","GO:1904892","GO:0045926","GO:0042…	["negative regulation of MAPK cascade","receptor signaling pathway via STAT","membrane docking","membrane lipid metabolic process","regulation of MAP kinase activity","tyrosine phosphorylation of STAT protein","cell cycle G2/M phase transition","protein serine/threonine phosphatase complex","phosphatase complex","phosphoprotein phosphatase activity","regulation of peptidyl-tyrosine phosphorylatio…	query	0.3333333333333333	1.6570008285004143E-4	5269.116437156388	2019.0	-3874.0
H__sapiens__1_-777673	H__sapiens__1_-777673	PGF	PGF	P49763	ENSP00000451413	5228	NP_002623	NM_002632	SHGC-10760	-0.1441581876734015	0.8657507861240432	["GO:0001935","GO:0001936","GO:0050678","GO:0002690","GO:0097529","GO:0035924","GO:0070482","GO:0002687","GO:0050673","GO:0050679","GO:0070851","GO:0001525","GO:0002688","GO:1901342","GO:0050927","GO:0030335","GO:1904018","GO:0045765","GO:0030595","GO:0002685","GO:0050926","GO:0050900","GO:0050920","GO:0060326","GO:0036293","GO:0050918","GO:0050921","GO:0005126"]	["endothelial cell proliferation","regulation of endothelial cell proliferation","regulation of epithelial cell proliferation","positive regulation of leukocyte chemotaxis","myeloid leukocyte migration","cellular response to vascular endothelial growth factor stimulus","response to oxygen levels","positive regulation of leukocyte migration","epithelial cell proliferation","positive regulation of …	query	0.3333333333333333	1.5241579027587258E-4	2290.652127584667	1335.0	-3874.0
H__sapiens__1_-777841	H__sapiens__1_-777841	EGR1	EGR1	P18146	ENSP00000239938	1958	NP_001955	NM_001964	ZIF-268	-0.16515304412986517	0.8477639488631465	["GO:0001659","GO:0070555","GO:0072111","GO:0007623","GO:0061614","GO:0120255","GO:0070482","GO:0032732","GO:0072001","GO:0061437","GO:0071347","GO:1903320","GO:0050810","GO:0042698","GO:0019216","GO:0032350","GO:0032835","GO:0046890","GO:0072012","GO:0006700","GO:0048511","GO:0072109","GO:0008202","GO:0010566","GO:0070997","GO:0042445","GO:0120178","GO:1901214","GO:0072210","GO:0046885","GO:0032…	["temperature homeostasis","response to interleukin-1","cell proliferation involved in kidney development","circadian rhythm","pri-miRNA transcription by RNA polymerase II","olefinic compound biosynthetic process","response to oxygen levels","positive regulation of interleukin-1 production","renal system development","renal system vasculature development","cellular response to interleukin-1","reg…	query	0.3333333333333333	1.529753709652746E-4	1978.3973859000162	1469.0	-3874.0
H__sapiens__1_-773268	H__sapiens__1_-773268	CUL3	CUL3	Q13618	ENSP00000484410	8452	NP_003581	NM_003590		-0.18209014541397742	0.8335261984647134	["GO:0035966","GO:0000910","GO:0033045","GO:0140014","GO:0031461","GO:0031396","GO:0051017","GO:0044784","GO:0007088","GO:0045840","GO:0006900","GO:1903320","GO:0000151","GO:0035967","GO:0016050","GO:0007266","GO:0007265","GO:0030071","GO:0051983","GO:0051650","GO:1902099","GO:0061659","GO:0051304","GO:0010965","GO:0051056","GO:0060070","GO:1905818","GO:0046578","GO:0043161","GO:0061572","GO:0000…	["response to topologically incorrect protein","cytokinesis","regulation of sister chromatid segregation","mitotic nuclear division","cullin-RING ubiquitin ligase complex","regulation of protein ubiquitination","actin filament bundle assembly","metaphase/anaphase transition of cell cycle","regulation of mitotic nuclear division","positive regulation of mitotic nuclear division","vesicle budding f…	query	0.3333333333333333	1.456664238892935E-4	1381.060945500644	1122.0	-3874.0
H__sapiens__1_-779920	H__sapiens__1_-779920	SLC19A3	SLC19A3	Q9BZV2	ENSP00000496701	80704	NP_079519	NM_025243	THTR2	-0.10986644279781764	0.8959537883873461	["GO:0006767","GO:0051180","GO:0035461","GO:0006766","GO:0090482"]	["water-soluble vitamin metabolic process","vitamin transport","vitamin transmembrane transport","vitamin metabolic process","vitamin transmembrane transporter activity"]	query	0.3333333333333333	1.5482272797646694E-4	2118.8210851882877	1333.0	-3874.0
H__sapiens__1_-789552	H__sapiens__1_-789552	ADRB3	ADRB3	P13945	ENSP00000343782	155	NP_000016	NM_000025		-0.1193323626857741	0.8875127756072299	["GO:0001659","GO:0035296","GO:0045744","GO:0120161","GO:0003073","GO:0007188","GO:0032091","GO:0008277","GO:0051100","GO:0015980","GO:0043393","GO:0008227","GO:0007187","GO:0051098","GO:0097746","GO:0003018","GO:0097755","GO:0106106","GO:0022401","GO:0007189","GO:0071875","GO:0008217","GO:0035150","GO:0019933","GO:0004930","GO:0019935","GO:0002029","GO:0023058","GO:1990845","GO:0003044"]	["temperature homeostasis","regulation of tube diameter","negative regulation of G protein-coupled receptor signaling pathway","regulation of cold-induced thermogenesis","regulation of systemic arterial blood pressure","adenylate cyclase-modulating G protein-coupled receptor signaling pathway","negative regulation of protein binding","regulation of G protein-coupled receptor signaling pathway","n…	query	0.3333333333333333	1.4914243102162565E-4	1461.0702746457005	1193.0	-3874.0
H__sapiens__1_-776265	H__sapiens__1_-776265	TRIM37	TRIM37	O94972	ENSP00000485901	4591	NP_056109	NM_015294	TEF3	-0.18142876094794072	0.8340776620890478	["GO:0051091","GO:0046605","GO:0032886","GO:1902116","GO:0010390","GO:0044389","GO:0016574","GO:0043433","GO:0061659","GO:0051494","GO:0033522","GO:0010639","GO:0016234","GO:0032813","GO:0006513","GO:0042579","GO:0005126","GO:1902115","GO:0004842"]	["positive regulation of DNA-binding transcription factor activity","regulation of centrosome cycle","regulation of microtubule-based process","negative regulation of organelle assembly","histone monoubiquitination","ubiquitin-like protein ligase binding","histone ubiquitination","negative regulation of DNA-binding transcription factor activity","ubiquitin-like protein ligase activity","negative …	query	0.3333333333333333	1.4725371815638345E-4	1551.1531214176769	1106.0	-3874.0
H__sapiens__1_-788863	H__sapiens__1_-788863	PTCH1	PTCH1	Q13635	ENSP00000450131	5727	NP_001341848	NM_001354919	PTCH	-0.13071738738517075	0.8774657222349829	["GO:0010874","GO:0030301","GO:0033344","GO:0043178","GO:0007224","GO:0015850","GO:0032373","GO:0001649","GO:0006869","GO:0021915","GO:0032370","GO:0036314","GO:0035113","GO:1905952","GO:1990778","GO:0072001","GO:0032371","GO:0003002","GO:0043009","GO:0035108","GO:0015918","GO:0044853","GO:0001503","GO:0007389","GO:0045926","GO:0097305","GO:0005496","GO:0001822","GO:0048589","GO:0060173","GO:0098…	["regulation of cholesterol efflux","cholesterol transport","cholesterol efflux","alcohol binding","smoothened signaling pathway","organic hydroxy compound transport","positive regulation of sterol transport","osteoblast differentiation","lipid transport","neural tube development","positive regulation of lipid transport","response to sterol","embryonic appendage morphogenesis","regulation of lipi…	query	0.3333333333333333	1.5241579027587258E-4	2059.392192197181	1389.0	-3874.0
H__sapiens__1_-789163	H__sapiens__1_-789163	AKR1C1	AKR1C1	Q04828	ENSP00000416415	1645	NP_001344	NM_001353	MBAB	-0.0911640982065739	0.9128678986226362	["GO:0006631","GO:0030301","GO:0004497","GO:0015850","GO:0006869","GO:0044241","GO:0043177","GO:0055088","GO:0006066","GO:0033293","GO:0006081","GO:0015718","GO:0016628","GO:0055092","GO:0015918","GO:0046942","GO:1902644","GO:0008202","GO:0031406","GO:0006720","GO:0050892","GO:0042445","GO:0016101","GO:0016709","GO:0005496","GO:0006721","GO:1901568","GO:0016627","GO:0001523","GO:0009410","GO:0120…	["fatty acid metabolic process","cholesterol transport","monooxygenase activity","organic hydroxy compound transport","lipid transport","lipid digestion","organic acid binding","lipid homeostasis","alcohol metabolic process","monocarboxylic acid binding","cellular aldehyde metabolic process","monocarboxylic acid transport","oxidoreductase activity, acting on the CH-CH group of donors, NAD or NADP…	query	0.3333333333333333	1.4682131845543972E-4	1027.1662871950557	958.0	-3874.0
H__sapiens__1_-785180	H__sapiens__1_-785180	CA7	CA7	P43166	ENSP00000447178	766	NP_005173	NM_005182		-0.1852657318944982	0.8308834622772192	["GO:0030641","GO:0055067","GO:0006885","GO:0016829","GO:0016835","GO:0030004"]	["regulation of cellular pH","monovalent inorganic cation homeostasis","regulation of pH","lyase activity","carbon-oxygen lyase activity","cellular monovalent inorganic cation homeostasis"]	query	0.3333333333333333	1.6350555918901244E-4	4009.076023593165	1667.0	-3874.0
H__sapiens__1_-789905	H__sapiens__1_-789905	CACNA1H	CACNA1H	O95180	ENSP00000492650	8912	NP_066921	NM_021098	Cav3.2	-0.16299405101430506	0.8495962426354504	["GO:0005244","GO:0051146","GO:0071248","GO:1903522","GO:0042692","GO:1903307","GO:0010038","GO:0005262","GO:0005245","GO:0006066","GO:0072509","GO:0120255","GO:0017158","GO:0001508","GO:2000243","GO:0022832","GO:0006081","GO:0008212","GO:0022843","GO:0008211","GO:0034309","GO:0006704","GO:0035637","GO:0045921","GO:0006700","GO:0060047","GO:0051899","GO:2000241","GO:1902644","GO:0014902","GO:0008…	["voltage-gated ion channel activity","striated muscle cell differentiation","cellular response to metal ion","regulation of blood circulation","muscle cell differentiation","positive regulation of regulated secretory pathway","response to metal ion","calcium channel activity","voltage-gated calcium channel activity","alcohol metabolic process","divalent inorganic cation transmembrane transporter…	query	0.3333333333333333	1.567152483936687E-4	2637.8956233774165	1444.0	-3874.0
H__sapiens__1_-778434	H__sapiens__1_-778434	TNFSF9	TNFSF9	P41273	ENSP00000245817	8744	NP_003802	NM_003811	4-1BBL	-0.13828185624921407	0.8708532017339198	["GO:0046006","GO:0042102","GO:0030217","GO:0051251","GO:1903708","GO:0070665","GO:0002696","GO:0034612","GO:0050870","GO:0050670","GO:1903037","GO:1902107","GO:0042129","GO:0070663","GO:0050867","GO:0050798","GO:0030098","GO:0007159","GO:0045621","GO:0045582","GO:0070661","GO:0071356","GO:0045619","GO:0045785","GO:1902105","GO:0046651","GO:0050671","GO:0022409","GO:0050863","GO:0042098","GO:0045…	["regulation of activated T cell proliferation","positive regulation of T cell proliferation","T cell differentiation","positive regulation of lymphocyte activation","positive regulation of hemopoiesis","positive regulation of leukocyte proliferation","positive regulation of leukocyte activation","response to tumor necrosis factor","positive regulation of T cell activation","regulation of lymphoc…	query	0.3333333333333333	1.595150741745095E-4	3245.349932780974	1526.0	-3874.0
H__sapiens__1_-777410	H__sapiens__1_-777410	ACADM	ACADM	P11310	ENSP00000442324	34	NP_001272973	NM_001286044	MCADH	-0.22722746573460906	0.7967395307340115	["GO:0006631","GO:0044242","GO:0016627","GO:0034440","GO:0046395","GO:0072329","GO:0016042","GO:0006635","GO:0030258","GO:0019395","GO:0006577","GO:0009062","GO:0016054","GO:0006575"]	["fatty acid metabolic process","cellular lipid catabolic process","oxidoreductase activity, acting on the CH-CH group of donors","lipid oxidation","carboxylic acid catabolic process","monocarboxylic acid catabolic process","lipid catabolic process","fatty acid beta-oxidation","lipid modification","fatty acid oxidation","amino-acid betaine metabolic process","fatty acid catabolic process","organi…	query	0.3333333333333333	1.6118633139909736E-4	4486.874398336555	1744.0	-3874.0
H__sapiens__1_-774986	H__sapiens__1_-774986	AP1B1	AP1B1	Q10567	ENSP00000400065	162	NP_663782	NM_145730	CLAPB2	-0.20336788707810435	0.8159779984395954	["GO:0019884","GO:0002495","GO:0019882","GO:0005802","GO:0002504","GO:0048002","GO:0002478"]	["antigen processing and presentation of exogenous antigen","antigen processing and presentation of peptide antigen via MHC class II","antigen processing and presentation","trans-Golgi network","antigen processing and presentation of peptide or polysaccharide antigen via MHC class II","antigen processing and presentation of peptide antigen","antigen processing and presentation of exogenous peptid…	query	0.3333333333333333	1.6869095816464237E-4	5661.732220433322	2079.0	-3874.0
H__sapiens__1_-778876	H__sapiens__1_-778876	CCNT1	CCNT1	O60563	ENSP00000491861	904	NP_001264771	NM_001277842	HIVE1	-0.18270704531961535	0.8330121548045788	["GO:1904029","GO:0051817","GO:0016538","GO:0019209","GO:0019887","GO:0019207","GO:0030295","GO:0048524","GO:0051702","GO:0061695","GO:0051851","GO:0035821","GO:0000307","GO:1902554","GO:1902911","GO:0019908","GO:0050792","GO:0043903"]	["regulation of cyclin-dependent protein kinase activity","modulation of process of other organism involved in symbiotic interaction","cyclin-dependent protein serine/threonine kinase regulator activity","kinase activator activity","protein kinase regulator activity","kinase regulator activity","protein kinase activator activity","positive regulation of viral process","interaction with symbiont",…	query	0.3333333333333333	1.4898688915375446E-4	1777.7999297709034	1183.0	-3874.0
H__sapiens__1_-816675	H__sapiens__1_-816675	INS	INS	P01308	ENSP00000424008	3630	NP_001278826	NM_001291897	IDDM2	-0.17020252521306029	0.843493970500556	["GO:0035296","GO:0009306","GO:0036473","GO:1900076","GO:0045981","GO:0050994","GO:1900180","GO:1904375","GO:0008643","GO:0019318","GO:2001243","GO:0008645","GO:0048015","GO:0016051","GO:0071375","GO:0002793","GO:0006090","GO:0055081","GO:0051354","GO:0014065","GO:0062014","GO:0001558","GO:0099177","GO:0046323","GO:0010676","GO:1904951","GO:0050999","GO:0045730","GO:0043954","GO:0046034","GO:1902…	["regulation of tube diameter","protein secretion","cell death in response to oxidative stress","regulation of cellular response to insulin stimulus","positive regulation of nucleotide metabolic process","regulation of lipid catabolic process","regulation of protein localization to nucleus","regulation of protein localization to cell periphery","carbohydrate transport","hexose metabolic process",…	query	0.3333333333333333	1.6149870801033592E-4	3956.1367070106617	1660.0	-3874.0
H__sapiens__1_-776585	H__sapiens__1_-776585	MYF5	MYF5	P13349	ENSP00000228644	4617	NP_005584	NM_005593	bHLHc2	-0.1668482430810135	0.8463280377276026	["GO:0051146","GO:0051149","GO:0042692","GO:0055002","GO:0010720","GO:0007517","GO:0045661","GO:0045165","GO:0051153","GO:0000978","GO:0055001","GO:0014706","GO:0005667","GO:0014902","GO:0051155","GO:0051147","GO:0060538","GO:0045445","GO:0060537"]	["striated muscle cell differentiation","positive regulation of muscle cell differentiation","muscle cell differentiation","striated muscle cell development","positive regulation of cell development","muscle organ development","regulation of myoblast differentiation","cell fate commitment","regulation of striated muscle cell differentiation","RNA polymerase II cis-regulatory region sequence-speci…	query	0.3333333333333333	1.5569048731122528E-4	2635.1272746784107	1429.0	-3874.0
H__sapiens__1_-783093	H__sapiens__1_-783093	ADIPOR1	ADIPOR1	Q96A54	ENSP00000402178	51094	NP_057083	NM_015999	PAQR1	-0.1808391006295715	0.834569629621431	["GO:0001659","GO:0006631","GO:0097696","GO:0034440","GO:0120161","GO:0019217","GO:0051271","GO:0030258","GO:0006633","GO:2000146","GO:0010631","GO:0006109","GO:0038061","GO:0005996","GO:0007259","GO:0072330","GO:0046394","GO:0019216","GO:0016053","GO:0001837","GO:0040013","GO:0042180","GO:0046890","GO:0046425","GO:0010632","GO:1904892","GO:0019318","GO:0106106","GO:0042562","GO:0030336","GO:0009…	["temperature homeostasis","fatty acid metabolic process","receptor signaling pathway via STAT","lipid oxidation","regulation of cold-induced thermogenesis","regulation of fatty acid metabolic process","negative regulation of cellular component movement","lipid modification","fatty acid biosynthetic process","negative regulation of cell motility","epithelial cell migration","regulation of carbohy…	query	0.3333333333333333	1.7021276595744682E-4	6175.906856762258	1931.0	-3874.0
H__sapiens__1_-782877	H__sapiens__1_-782877	TAB3	TAB3	Q8N5C8	ENSP00000433193	257397	NP_690000	NM_152787	MAP3K7IP3	-0.039771096825567925	0.961009392077907	["GO:0051091","GO:0031098","GO:0070555","GO:0002753","GO:0043406","GO:0043405","GO:0031330","GO:0002221","GO:0030522","GO:0002220","GO:0071347","GO:0007249","GO:0071902","GO:0043122","GO:0002833","GO:0032147","GO:0002758","GO:0045089","GO:0038093","GO:0045088","GO:0010506","GO:0051403","GO:0002218","GO:0031349","GO:0009895","GO:0002224","GO:0035872"]	["positive regulation of DNA-binding transcription factor activity","stress-activated protein kinase signaling cascade","response to interleukin-1","cytoplasmic pattern recognition receptor signaling pathway","positive regulation of MAP kinase activity","regulation of MAP kinase activity","negative regulation of cellular catabolic process","pattern recognition receptor signaling pathway","intrace…	query	0.3333333333333333	1.3962580284836637E-4	570.7825462331074	656.0	-3874.0
H__sapiens__1_-779578	H__sapiens__1_-779578	CAMK1	CAMK1	Q14012	ENSP00000404587	8536	NP_003647	NM_003656	CaMKI-alpha	-0.1612056306318698	0.8511170373774286	["GO:0046825","GO:0046824","GO:0018209","GO:2000756","GO:1904951","GO:0042692","GO:0031056","GO:0000768","GO:0016358","GO:0050807","GO:0032388","GO:0061647","GO:0051100","GO:0043393","GO:0051222","GO:1901983","GO:0051147","GO:0035065","GO:0043966","GO:0060996","GO:0006475","GO:0018393","GO:0051098","GO:0018105","GO:0006949","GO:0060142","GO:0031346","GO:0050808","GO:0050803","GO:0043970","GO:0046…	["regulation of protein export from nucleus","positive regulation of nucleocytoplasmic transport","peptidyl-serine modification","regulation of peptidyl-lysine acetylation","positive regulation of establishment of protein localization","muscle cell differentiation","regulation of histone modification","syncytium formation by plasma membrane fusion","dendrite development","regulation of synapse or…	query	0.3333333333333333	1.5807777426493836E-4	2897.3232031003113	1572.0	-3874.0
H__sapiens__1_-781947	H__sapiens__1_-781947	DRD2	DRD2	P14416	ENSP00000442172	1813	NP_057658	NM_016574		-0.12958539493813023	0.878459569212599	["GO:0035270","GO:0009306","GO:0061351","GO:1903522","GO:0090277","GO:0050905","GO:0071868","GO:0051932","GO:0009416","GO:0051282","GO:0007405","GO:0007188","GO:0070588","GO:0051048","GO:0051208","GO:1902692","GO:0034766","GO:0009914","GO:0051966","GO:0071870","GO:0040013","GO:0050769","GO:1904063","GO:0060047","GO:0048511","GO:0046942","GO:0002793","GO:0006816","GO:0021953","GO:0051235","GO:0051…	["endocrine system development","protein secretion","neural precursor cell proliferation","regulation of blood circulation","positive regulation of peptide hormone secretion","neuromuscular process","cellular response to monoamine stimulus","synaptic transmission, GABAergic","response to light stimulus","regulation of sequestering of calcium ion","neuroblast proliferation","adenylate cyclase-modu…	query	0.3333333333333333	1.5051173991571343E-4	1938.805508199277	1351.0	-3874.0
H__sapiens__1_-783080	H__sapiens__1_-783080	ACTC1	ACTC1	P68032	ENSP00000290378	70	NP_005150	NM_005159	CMD1R	-0.1768249901333954	0.8379264170820253	["GO:0055007","GO:0055006","GO:0051146","GO:0042692","GO:0006936","GO:0035051","GO:0014706","GO:0031252","GO:0030239","GO:0098858","GO:0015629","GO:0070252","GO:0007507","GO:0055002","GO:0007517","GO:0055013","GO:0043292","GO:0003007","GO:0030048","GO:0030016","GO:0055001","GO:0003015","GO:0060485","GO:0060415","GO:0048738","GO:0048644","GO:0031032","GO:0072132","GO:0090130","GO:0060537","GO:0030…	["cardiac muscle cell differentiation","cardiac cell development","striated muscle cell differentiation","muscle cell differentiation","muscle contraction","cardiocyte differentiation","striated muscle tissue development","cell leading edge","myofibril assembly","actin-based cell projection","actin cytoskeleton","actin-mediated cell contraction","heart development","striated muscle cell developme…	query	0.3333333333333333	1.6297262059973924E-4	3686.95871557844	1882.0	-3874.0
H__sapiens__1_-773130	H__sapiens__1_-773130	CYP24A1	CYP24A1	Q07973	ENSP00000379285	1591	NP_001122387	NM_001128915	P450-CC24	-0.1800101932724985	0.8352616973177905	["GO:0006631","GO:0034440","GO:0042359","GO:0004497","GO:0016042","GO:0030258","GO:0030522","GO:0019395","GO:0033280","GO:0033273","GO:0046906","GO:0071496","GO:0031670","GO:0006775","GO:0006766","GO:0006706","GO:0001503","GO:0031668","GO:0031669","GO:0008202","GO:1901616","GO:0019867","GO:0031667","GO:0031968","GO:0071295","GO:0016705","GO:0007584","GO:0009991"]	["fatty acid metabolic process","lipid oxidation","vitamin D metabolic process","monooxygenase activity","lipid catabolic process","lipid modification","intracellular receptor signaling pathway","fatty acid oxidation","response to vitamin D","response to vitamin","tetrapyrrole binding","cellular response to external stimulus","cellular response to nutrient","fat-soluble vitamin metabolic process"…	query	0.3333333333333333	1.5770383220312253E-4	2959.1617362320944	1536.0	-3874.0
H__sapiens__1_-773344	H__sapiens__1_-773344	PHKA2	PHKA2	P46019	ENSP00000369274	5256	NP_000283	NM_000292	PYK	-0.17457090558130847	0.8398173043838669	["GO:0006112","GO:0044042","GO:0044275","GO:0044247","GO:0009251","GO:0044264","GO:0000272","GO:0005977","GO:0015980","GO:0061695","GO:1902554","GO:1902911","GO:0005976","GO:0006073","GO:0004674","GO:0016052","GO:0044262"]	["energy reserve metabolic process","glucan metabolic process","cellular carbohydrate catabolic process","cellular polysaccharide catabolic process","glucan catabolic process","cellular polysaccharide metabolic process","polysaccharide catabolic process","glycogen metabolic process","energy derivation by oxidation of organic compounds","transferase complex, transferring phosphorus-containing grou…	query	0.3333333333333333	1.5257857796765334E-4	2452.3060802246305	1340.0	-3874.0
H__sapiens__1_-790663	H__sapiens__1_-790663	CD3E	CD3E	P07766	ENSP00000433975	916	NP_000724	NM_000733		-0.16964738845768723	0.8439623550032141	["GO:0030217","GO:0060090","GO:0051251","GO:0043368","GO:0070665","GO:0002696","GO:0050870","GO:0050670","GO:1903037","GO:0033628","GO:0042129","GO:0070663","GO:0033077","GO:0050867","GO:0030098","GO:0007159","GO:0010811","GO:0070661","GO:0045785","GO:0045058","GO:0001952","GO:0009986","GO:0098802","GO:0046651","GO:0050671","GO:0030674","GO:0022409","GO:0050863","GO:0042098","GO:0050851","GO:0031…	["T cell differentiation","molecular adaptor activity","positive regulation of lymphocyte activation","positive T cell selection","positive regulation of leukocyte proliferation","positive regulation of leukocyte activation","positive regulation of T cell activation","regulation of lymphocyte proliferation","regulation of leukocyte cell-cell adhesion","regulation of cell adhesion mediated by inte…	query	0.3333333333333333	1.6744809109176155E-4	5515.523050156439	2068.0	-3874.0
H__sapiens__1_-782026	H__sapiens__1_-782026	TAOK2	TAOK2	Q9UL54	ENSP00000440336	9344	NP_057235	NM_016151	TAO2	-0.10146260456433139	0.9035149660462709	["GO:1901991","GO:0031098","GO:0010972","GO:0045930","GO:0043406","GO:0043405","GO:0016358","GO:0140058","GO:0044839","GO:0046328","GO:0007044","GO:0070302","GO:0030425","GO:0048813","GO:0044818","GO:0071902","GO:0000075","GO:0032147","GO:0022604","GO:0030424","GO:0032872","GO:0044773","GO:1902750","GO:0031570","GO:0000086","GO:0031572","GO:1902749","GO:1901988","GO:0007093","GO:0044774","GO:0070…	["negative regulation of mitotic cell cycle phase transition","stress-activated protein kinase signaling cascade","negative regulation of G2/M transition of mitotic cell cycle","negative regulation of mitotic cell cycle","positive regulation of MAP kinase activity","regulation of MAP kinase activity","dendrite development","neuron projection arborization","cell cycle G2/M phase transition","regul…	query	0.3333333333333333	1.4291839359725596E-4	761.4615471598694	828.0	-3874.0
H__sapiens__1_-780842	H__sapiens__1_-780842	ARSG	ARSG	Q96EG1	ENSP00000480910	22901	NP_055775	NM_014960	KIAA1001	-0.046604419855776104	0.9544648902800958	["GO:0008484"]	["sulfuric ester hydrolase activity"]	query	0.3333333333333333	1.4204545454545454E-4	659.0964670217048	755.0	-3874.0
H__sapiens__1_-774057	H__sapiens__1_-774057	ACTB	ACTB	P60709	ENSP00000502821	60	NP_001092	NM_001101		-0.1524783187426022	0.8585775087945615	["GO:0032409","GO:0006909","GO:0045216","GO:0002431","GO:0015850","GO:1902414","GO:0070633","GO:1905475","GO:0015844","GO:0070646","GO:0150105","GO:0031252","GO:0048857","GO:0051100","GO:0043393","GO:0030168","GO:0061629","GO:1990778","GO:0007420","GO:0038094","GO:0015629","GO:0002433","GO:0005911","GO:0051098","GO:0007596","GO:1904375","GO:0030901","GO:0050817","GO:1904029","GO:0050808","GO:0090…	["regulation of transporter activity","phagocytosis","cell-cell junction organization","Fc receptor mediated stimulatory signaling pathway","organic hydroxy compound transport","protein localization to cell junction","transepithelial transport","regulation of protein localization to membrane","monoamine transport","protein modification by small protein removal","protein localization to cell-cell …	query	0.3333333333333333	1.6059097478721696E-4	3784.5136798315793	1929.0	-3874.0
H__sapiens__1_-776350	H__sapiens__1_-776350	CACNG1	CACNG1	Q06432	ENSP00000226021	786	NP_000718	NM_000727	CACNLG	-0.18168979514816674	0.8338599677076735	["GO:0061577","GO:1903522","GO:1903169","GO:0010959","GO:0008016","GO:0005891","GO:0030315","GO:0035637","GO:0060047","GO:1990351","GO:1904062","GO:0070588","GO:0006816","GO:0034704","GO:0099106","GO:0003015","GO:1902495","GO:0051924","GO:0034765","GO:0016247","GO:0042383"]	["calcium ion transmembrane transport via high voltage-gated calcium channel","regulation of blood circulation","regulation of calcium ion transmembrane transport","regulation of metal ion transport","regulation of heart contraction","voltage-gated calcium channel complex","T-tubule","multicellular organismal signaling","heart contraction","transporter complex","regulation of cation transmembrane…	query	0.3333333333333333	1.639344262295082E-4	5271.691780560457	1821.0	-3874.0
H__sapiens__1_-775595	H__sapiens__1_-775595	ACSBG1	ACSBG1	Q96GR2	ENSP00000454188	23205	NP_055977	NM_015162	MGC14352	-0.11718700639241518	0.889418850599738	["GO:0006631","GO:1901568","GO:0035383","GO:1901570","GO:0071616","GO:0001676","GO:0035336","GO:0015645","GO:0009260","GO:0006637","GO:0007272","GO:0033865","GO:0016878","GO:0006633","GO:0033875","GO:0016874","GO:0016405","GO:0034033","GO:0006164","GO:0072330","GO:0046394","GO:0016053","GO:0046949","GO:0009165","GO:0035384","GO:0044272","GO:0016877","GO:0072522","GO:0046390","GO:0009152","GO:0035…	["fatty acid metabolic process","fatty acid derivative metabolic process","thioester metabolic process","fatty acid derivative biosynthetic process","acyl-CoA biosynthetic process","long-chain fatty acid metabolic process","long-chain fatty-acyl-CoA metabolic process","fatty acid ligase activity","ribonucleotide biosynthetic process","acyl-CoA metabolic process","ensheathment of neurons","nucleos…	query	0.3333333333333333	1.4742739200943535E-4	1222.6998774021151	1045.0	-3874.0
H__sapiens__1_-779034	H__sapiens__1_-779034	OLFM1	OLFM1	Q99784	ENSP00000444296	10439	NP_055094	NM_014279	OlfA	-0.12348261835882314	0.8838370036482224	["GO:0030424","GO:0032535","GO:0048589","GO:0007507","GO:0003188","GO:0003171","GO:0048588","GO:0003007","GO:1990138","GO:0060485","GO:0007409","GO:0048762","GO:0003181","GO:0048638","GO:0003170","GO:0060560","GO:0044297","GO:0001558","GO:0010717","GO:0003179","GO:0008361","GO:0001837"]	["axon","regulation of cellular component size","developmental growth","heart development","heart valve formation","atrioventricular valve development","developmental cell growth","heart morphogenesis","neuron projection extension","mesenchyme development","axonogenesis","mesenchymal cell differentiation","atrioventricular valve morphogenesis","regulation of developmental growth","heart valve dev…	query	0.3333333333333333	1.5167602002123465E-4	1738.7215634486067	1321.0	-3874.0
H__sapiens__1_-778984	H__sapiens__1_-778984	GDF1	GDF1	P27539	ENSP00000247005	2657	NP_001483	NM_001492		-0.03087084595042828	0.9696007928583965	["GO:0060393","GO:0090092","GO:0090100","GO:0060389","GO:0071773","GO:0071772","GO:0007178"]	["regulation of pathway-restricted SMAD protein phosphorylation","regulation of transmembrane receptor protein serine/threonine kinase signaling pathway","positive regulation of transmembrane receptor protein serine/threonine kinase signaling pathway","pathway-restricted SMAD protein phosphorylation","cellular response to BMP stimulus","response to BMP","transmembrane receptor protein serine/thre…	query	0.3333333333333333	1.3622122326658494E-4	346.65991477795853	468.0	-3874.0
H__sapiens__1_-774165	H__sapiens__1_-774165	EDN1	EDN1	P05305	ENSP00000368683	1906	NP_001946	NM_001955	ET1	-0.151375304963775	0.8595250540986479	["GO:0060421","GO:0006631","GO:0035296","GO:1990266","GO:0051146","GO:0048660","GO:1903522","GO:1903428","GO:0043405","GO:0046620","GO:0008277","GO:0014706","GO:0006809","GO:0009914","GO:0048017","GO:0007596","GO:0071902","GO:1900047","GO:0050817","GO:0016053","GO:0030335","GO:0003018","GO:0090257","GO:0035265","GO:0050900","GO:0060047","GO:0048015","GO:0050819","GO:0090132","GO:0001558","GO:0032…	["positive regulation of heart growth","fatty acid metabolic process","regulation of tube diameter","neutrophil migration","striated muscle cell differentiation","regulation of smooth muscle cell proliferation","regulation of blood circulation","positive regulation of reactive oxygen species biosynthetic process","regulation of MAP kinase activity","regulation of organ growth","regulation of G pr…	query	0.3333333333333333	1.5878056525881233E-4	2863.9574335803945	1700.0	-3874.0
H__sapiens__1_-788849	H__sapiens__1_-788849	ATP6V0C	ATP6V0C	P27449	ENSP00000457782	527	NP_001685	NM_001694	Vma3	-0.17385082474321062	0.8404222585140554	["GO:0030641","GO:0055067","GO:0045851","GO:0005766","GO:0045335","GO:0022804","GO:0015399","GO:0044389","GO:0030004","GO:0051453","GO:0006826","GO:0042626","GO:0030139","GO:0043434","GO:0006885","GO:0030666","GO:0016874","GO:0015078","GO:0019829","GO:0101002","GO:0051452","GO:1901653","GO:0015252","GO:0000041","GO:0009678","GO:0005765","GO:0032869","GO:0071375","GO:0032868","GO:0042582","GO:0090…	["regulation of cellular pH","monovalent inorganic cation homeostasis","pH reduction","primary lysosome","phagocytic vesicle","active transmembrane transporter activity","primary active transmembrane transporter activity","ubiquitin-like protein ligase binding","cellular monovalent inorganic cation homeostasis","regulation of intracellular pH","iron ion transport","ATPase-coupled transmembrane tr…	query	0.3333333333333333	1.6385384237260363E-4	4380.85744605318	1773.0	-3874.0
H__sapiens__1_-780050	H__sapiens__1_-780050	SKIL	SKIL	P12757	ENSP00000418237	6498	NP_005405	NM_005414	SnoN	-0.12060901113941366	0.8863804567350249	["GO:0007179","GO:0017015","GO:0071773","GO:0071559","GO:0007178","GO:0090092","GO:0090101","GO:0030509","GO:0030510","GO:1903844","GO:0071560","GO:0090288","GO:0071772","GO:0090287"]	["transforming growth factor beta receptor signaling pathway","regulation of transforming growth factor beta receptor signaling pathway","cellular response to BMP stimulus","response to transforming growth factor beta","transmembrane receptor protein serine/threonine kinase signaling pathway","regulation of transmembrane receptor protein serine/threonine kinase signaling pathway","negative regula…	query	0.3333333333333333	1.5039855617386073E-4	1785.254446295233	1282.0	-3874.0
H__sapiens__1_-790685	H__sapiens__1_-790685	MT-ND1	MT-ND1	P03886	ENSP00000354687	4535	YP_003024026		NAD1	-5.60603621202737E-4	0.9994395534876473	["GO:0010257","GO:0003955","GO:0022900","GO:0045271","GO:1990204","GO:0046034","GO:0033108","GO:0003954","GO:0098800","GO:0022904","GO:0042773","GO:0015980","GO:0098798","GO:0030964","GO:0098803","GO:0042775","GO:0005743","GO:0050136","GO:0005746","GO:0045333","GO:0070469","GO:0016655","GO:0016651","GO:0006119"]	["NADH dehydrogenase complex assembly","NAD(P)H dehydrogenase (quinone) activity","electron transport chain","respiratory chain complex I","oxidoreductase complex","ATP metabolic process","mitochondrial respiratory chain complex assembly","NADH dehydrogenase activity","inner mitochondrial membrane protein complex","respiratory electron transport chain","ATP synthesis coupled electron transport","…	query	0.3333333333333333	1.2776287210936502E-4	0.0	44.0	-3874.0
H__sapiens__1_-778882	H__sapiens__1_-778882	CDKN2D	CDKN2D	P55273	ENSP00000377224	1032	NP_524145	NM_079421	INK4D	-0.15280071591612193	0.8583007504479301	["GO:1901991","GO:0097193","GO:0000082","GO:0043281","GO:0045930","GO:0016538","GO:0044843","GO:1902229","GO:0009416","GO:0010466","GO:2000116","GO:0004860","GO:0030291","GO:2000045","GO:2001234","GO:2001021","GO:2001233","GO:0033273","GO:0051346","GO:0008630","GO:1904029","GO:2001243","GO:0019887","GO:0019207","GO:1901988","GO:1902806","GO:0071897","GO:2001242","GO:0010951","GO:0019210","GO:2001…	["negative regulation of mitotic cell cycle phase transition","intrinsic apoptotic signaling pathway","G1/S transition of mitotic cell cycle","regulation of cysteine-type endopeptidase activity involved in apoptotic process","negative regulation of mitotic cell cycle","cyclin-dependent protein serine/threonine kinase regulator activity","cell cycle G1/S phase transition","regulation of intrinsic …	query	0.3333333333333333	1.545595054095827E-4	2360.007102403067	1390.0	-3874.0
H__sapiens__1_-786031	H__sapiens__1_-786031	BPGM	BPGM	P07738	ENSP00000403050	669	NP_954655	NM_199186		-0.18980780572228093	0.8271180860311653	["GO:0046939","GO:0006734","GO:0009132","GO:0019674","GO:0061620","GO:0046034","GO:0019318","GO:0019320","GO:0009179","GO:0006757","GO:0009185","GO:0006096","GO:0006007","GO:0006090","GO:0006735","GO:0006006","GO:0061718","GO:0005996","GO:0009135","GO:0046031","GO:0016052","GO:0046365","GO:0061615","GO:0006165"]	["nucleotide phosphorylation","NADH metabolic process","nucleoside diphosphate metabolic process","NAD metabolic process","glycolytic process through glucose-6-phosphate","ATP metabolic process","hexose metabolic process","hexose catabolic process","purine ribonucleoside diphosphate metabolic process","ATP generation from ADP","ribonucleoside diphosphate metabolic process","glycolytic process","g…	query	0.3333333333333333	1.6212710765239947E-4	4903.961037242524	1809.0	-3874.0
H__sapiens__1_-784689	H__sapiens__1_-784689	LDHAL6A	LDHAL6A	Q6ZMR3	ENSP00000478764	160287	NP_659409	NM_144972	MGC23940	-0.05255828934408059	0.9487990145717039	["GO:0016616","GO:0016614"]	["oxidoreductase activity, acting on the CH-OH group of donors, NAD or NADP as acceptor","oxidoreductase activity, acting on CH-OH group of donors"]	query	0.3333333333333333	1.4367816091954023E-4	932.0544483573802	838.0	-3874.0
H__sapiens__1_-786002	H__sapiens__1_-786002	CXCR6	CXCR6	O00574	ENSP00000396886	10663	NP_006555	NM_006564	TYMSTR	-0.11335811633372694	0.892830865541397	["GO:0001637","GO:0006874","GO:0001653","GO:0009986","GO:0051480","GO:0004930","GO:0019956","GO:0019058","GO:0019955","GO:0140375","GO:0004896","GO:0004950","GO:0008528"]	["G protein-coupled chemoattractant receptor activity","cellular calcium ion homeostasis","peptide receptor activity","cell surface","regulation of cytosolic calcium ion concentration","G protein-coupled receptor activity","chemokine binding","viral life cycle","cytokine binding","immune receptor activity","cytokine receptor activity","chemokine receptor activity","G protein-coupled peptide recep…	query	0.3333333333333333	1.4723203769140164E-4	1068.2036181513238	1131.0	-3874.0
H__sapiens__1_-779718	H__sapiens__1_-779718	PDGFRA	PDGFRA	P16234	ENSP00000426472	5156	NP_006197	NM_006206	PDGFR2	-0.1334354983406996	0.8750839115215985	["GO:0051146","GO:0043551","GO:0014706","GO:0048705","GO:0048608","GO:0019199","GO:0072001","GO:0061437","GO:0001525","GO:0048017","GO:0007596","GO:1900047","GO:0050817","GO:0060191","GO:0043009","GO:0072012","GO:0090218","GO:0004713","GO:0006979","GO:0048008","GO:0048015","GO:0048511","GO:0000302","GO:0050819","GO:0014065","GO:0032102","GO:0004714","GO:0001822","GO:0055006","GO:0070372","GO:0048…	["striated muscle cell differentiation","regulation of phosphatidylinositol 3-kinase activity","striated muscle tissue development","skeletal system morphogenesis","reproductive structure development","transmembrane receptor protein kinase activity","renal system development","renal system vasculature development","angiogenesis","inositol lipid-mediated signaling","blood coagulation","negative re…	query	0.3333333333333333	1.5686274509803922E-4	2702.1266519562355	1732.0	-3874.0
H__sapiens__1_-789879	H__sapiens__1_-789879	SIAH1	SIAH1	Q8IUQ4	ENSP00000457415	6477	NP_003022	NM_003031	hSIAH1	-0.1837664718736191	0.8321301069229445	["GO:0097193","GO:0007409","GO:0070997","GO:0061659","GO:0097485","GO:2001233","GO:0004842","GO:2001235","GO:2001242","GO:0043065"]	["intrinsic apoptotic signaling pathway","axonogenesis","neuron death","ubiquitin-like protein ligase activity","neuron projection guidance","regulation of apoptotic signaling pathway","ubiquitin-protein transferase activity","positive regulation of apoptotic signaling pathway","regulation of intrinsic apoptotic signaling pathway","positive regulation of apoptotic process"]	query	0.3333333333333333	1.5096618357487922E-4	2046.5276133986754	1330.0	-3874.0
H__sapiens__1_-781421	H__sapiens__1_-781421	DGKQ	DGKQ	P52824	ENSP00000427268	1609	NP_001338	NM_001347	DAGK7	-0.150961107084546	0.8598811412933893	["GO:1902652","GO:0031929","GO:0008203","GO:0030295","GO:0006066","GO:0006638","GO:0030258","GO:0120255","GO:0046683","GO:0018212","GO:0008654","GO:0050810","GO:0001933","GO:0006109","GO:0005996","GO:0046474","GO:0007596","GO:1902930","GO:0050817","GO:0019216","GO:0032006","GO:0006639","GO:0008211","GO:0046364","GO:0032350","GO:0034309","GO:0006704","GO:0010799","GO:0046890","GO:0019318","GO:0019…	["secondary alcohol metabolic process","TOR signaling","cholesterol metabolic process","protein kinase activator activity","alcohol metabolic process","neutral lipid metabolic process","lipid modification","olefinic compound biosynthetic process","response to organophosphorus","peptidyl-tyrosine modification","phospholipid biosynthetic process","regulation of steroid biosynthetic process","negati…	query	0.3333333333333333	1.525320317266626E-4	2145.5336456678383	1271.0	-3874.0
H__sapiens__1_-776348	H__sapiens__1_-776348	SMURF2	SMURF2	Q9HAU4	ENSP00000464432	64750	NP_073576	NM_022739		-0.19692722923839248	0.8212503941548637	["GO:0017015","GO:0071559","GO:0070646","GO:0001738","GO:2000243","GO:0030509","GO:1901163","GO:0007566","GO:0004842","GO:0090288","GO:0007179","GO:0001736","GO:0030335","GO:0044706","GO:0061659","GO:0071773","GO:2000241","GO:0007178","GO:0060070","GO:0090175","GO:0035567","GO:0061450","GO:0090092","GO:0030177","GO:0090101","GO:0060828","GO:0007164","GO:0030510","GO:2000027","GO:1903844","GO:0071…	["regulation of transforming growth factor beta receptor signaling pathway","response to transforming growth factor beta","protein modification by small protein removal","morphogenesis of a polarized epithelium","positive regulation of reproductive process","BMP signaling pathway","regulation of trophoblast cell migration","embryo implantation","ubiquitin-protein transferase activity","negative r…	query	0.3333333333333333	1.5530361857431278E-4	2812.683537132588	1638.0	-3874.0
H__sapiens__1_-786199	H__sapiens__1_-786199	HSPA6	HSPA6	P17066	ENSP00000310219	3310	NP_002146	NM_002155	HSP70B'	-0.12554829541160203	0.8820131662094914	["GO:0034605","GO:0035966","GO:0101002","GO:0044389","GO:0006986","GO:0009408","GO:0009266","GO:0035967"]	["cellular response to heat","response to topologically incorrect protein","ficolin-1-rich granule","ubiquitin-like protein ligase binding","response to unfolded protein","response to heat","response to temperature stimulus","cellular response to topologically incorrect protein"]	query	0.3333333333333333	1.5420200462606013E-4	2125.2343050829045	1362.0	-3874.0
H__sapiens__1_-788806	H__sapiens__1_-788806	MOSMO	C16orf52	Q8NHV5	ENSP00000492059	730094	NP_001158051	NM_001164579	C16orf52	-0.04749982054591691	0.9536106442619348	["GO:0008589","GO:0007224","GO:0031253"]	["regulation of smoothened signaling pathway","smoothened signaling pathway","cell projection membrane"]	query	0.3333333333333333	1.43000143000143E-4	1149.9466130190337	838.0	-3874.0
H__sapiens__1_-777333	H__sapiens__1_-777333	LAMTOR2	LAMTOR2	Q9Y2Q5	ENSP00000357288	28956	NP_054736	NM_014017	ROBLD3	-0.1575361670392375	0.8542459175041557	["GO:0001101","GO:0031929","GO:0098857","GO:0045121","GO:0043200","GO:0042581","GO:0005770","GO:0010008","GO:0150115","GO:0070820","GO:0010506","GO:0071229","GO:0030667","GO:0031902","GO:0016236","GO:0032006"]	["response to acid chemical","TOR signaling","membrane microdomain","membrane raft","response to amino acid","specific granule","late endosome","endosome membrane","cell-substrate junction organization","tertiary granule","regulation of autophagy","cellular response to acid chemical","secretory granule membrane","late endosome membrane","macroautophagy","regulation of TOR signaling"]	query	0.3333333333333333	1.5158405335758679E-4	2063.4948729749412	1179.0	-3874.0
H__sapiens__1_-776873	H__sapiens__1_-776873	GHR	GHR	P10912	ENSP00000483926	2690	NP_001229391	NM_001242462	GHBP	-0.17823073328354075	0.8367493352920554	["GO:0097696","GO:0048589","GO:0043406","GO:0043405","GO:0007260","GO:0043434","GO:0050730","GO:0050731","GO:0018212","GO:0048639","GO:0007259","GO:0045927","GO:0071902","GO:0071378","GO:0060396","GO:0060416","GO:0032147","GO:0042277","GO:1901653","GO:0018108","GO:0046425","GO:1904892","GO:0042562","GO:0009986","GO:0071375","GO:0046427","GO:0035264","GO:0140375","GO:0004896","GO:0043235","GO:0048…	["receptor signaling pathway via STAT","developmental growth","positive regulation of MAP kinase activity","regulation of MAP kinase activity","tyrosine phosphorylation of STAT protein","response to peptide hormone","regulation of peptidyl-tyrosine phosphorylation","positive regulation of peptidyl-tyrosine phosphorylation","peptidyl-tyrosine modification","positive regulation of developmental gro…	query	0.3333333333333333	1.7108639863130882E-4	6251.044075834139	2349.0	-3874.0
H__sapiens__1_-773037	H__sapiens__1_-773037	PLAUR	PLAUR	Q03405	ENSP00000473055	5329	NP_002650	NM_002659	URKR	-0.15137884888667474	0.8595220080135233	["GO:0097193","GO:0043281","GO:0043154","GO:0050818","GO:0042581","GO:0034110","GO:0010466","GO:0042058","GO:2000116","GO:2001234","GO:0007173","GO:1903034","GO:1900046","GO:2001233","GO:0051098","GO:0007596","GO:0051346","GO:1900047","GO:0050817","GO:1901184","GO:0030193","GO:1903035","GO:0045785","GO:1901186","GO:0051099","GO:0010821","GO:0010822","GO:2001242","GO:0010951","GO:2001267","GO:0030…	["intrinsic apoptotic signaling pathway","regulation of cysteine-type endopeptidase activity involved in apoptotic process","negative regulation of cysteine-type endopeptidase activity involved in apoptotic process","regulation of coagulation","specific granule","regulation of homotypic cell-cell adhesion","negative regulation of peptidase activity","regulation of epidermal growth factor receptor…	query	0.3333333333333333	1.5782828282828284E-4	2610.1775749658937	1544.0	-3874.0
H__sapiens__1_-773778	H__sapiens__1_-773778	OTUD5	OTUD5	Q96G74	ENSP00000481335	55593	NP_060072	NM_017602	DUBA	-0.06628662728599603	0.9358625820929858	["GO:0032479","GO:0032606","GO:0002237","GO:0070646","GO:0001818"]	["regulation of type I interferon production","type I interferon production","response to molecule of bacterial origin","protein modification by small protein removal","negative regulation of cytokine production"]	query	0.3333333333333333	1.4245014245014244E-4	784.6028953417451	770.0	-3874.0
H__sapiens__1_-773278	H__sapiens__1_-773278	FLT4	FLT4	P35916	ENSP00000481134	2324	NP_891555	NM_182925	VEGFR3	-0.11139817682269287	0.894582475995997	["GO:0004714","GO:0070372","GO:0031098","GO:0043542","GO:0001935","GO:0001936","GO:0050678","GO:0048771","GO:0046328","GO:0090036","GO:0035924","GO:0019199","GO:0019902","GO:0018212","GO:0050673","GO:0050679","GO:0010631","GO:0070302","GO:0001525","GO:0010594","GO:0010634","GO:0070371","GO:0032872","GO:0010573","GO:0030335","GO:0070528","GO:0010632","GO:0004713","GO:0070304","GO:0007254","GO:0001…	["transmembrane receptor protein tyrosine kinase activity","regulation of ERK1 and ERK2 cascade","stress-activated protein kinase signaling cascade","endothelial cell migration","endothelial cell proliferation","regulation of endothelial cell proliferation","regulation of epithelial cell proliferation","tissue remodeling","regulation of JNK cascade","regulation of protein kinase C signaling","cel…	query	0.3333333333333333	1.4705882352941175E-4	1054.4363812599506	1032.0	-3874.0
H__sapiens__1_-788479	H__sapiens__1_-788479	PLA2G6	PLA2G6	O60733	ENSP00000500600	8398	NP_003551	NM_003560	PNPLA9	-0.1449436086826975	0.8650710742327488	["GO:0009306","GO:0042593","GO:0006959","GO:0006909","GO:0090277","GO:0016042","GO:0009746","GO:0051222","GO:0042742","GO:0038094","GO:0046471","GO:0008654","GO:0009914","GO:0046474","GO:0046887","GO:0016298","GO:0030073","GO:0050714","GO:0030072","GO:0035773","GO:0016790","GO:0002793","GO:0004620","GO:0032048","GO:0046503","GO:0002791","GO:0016289","GO:0033500","GO:0046470","GO:0046879","GO:0032…	["protein secretion","glucose homeostasis","humoral immune response","phagocytosis","positive regulation of peptide hormone secretion","lipid catabolic process","response to hexose","positive regulation of protein transport","defense response to bacterium","Fc-gamma receptor signaling pathway","phosphatidylglycerol metabolic process","phospholipid biosynthetic process","hormone transport","glycer…	query	0.3333333333333333	1.5489467162329616E-4	2803.222397062282	1385.0	-3874.0
H__sapiens__1_-782071	H__sapiens__1_-782071	CD226	CD226	Q15762	ENSP00000464334	10666	NP_006557	NM_006566	TLiSA1	-0.14263693432624647	0.8670688146787286	["GO:0031343","GO:0002819","GO:0002699","GO:0042269","GO:0002418","GO:0002824","GO:0002702","GO:0019724","GO:0002449","GO:0002250","GO:0045576","GO:0002833","GO:0002837","GO:0002347","GO:0002703","GO:0002714","GO:0002821","GO:0001906","GO:0009986","GO:0001910","GO:0050852","GO:0002822","GO:0002460","GO:0050851","GO:0045088","GO:0002834","GO:0002700","GO:0045954","GO:0002705","GO:0002839","GO:0002…	["positive regulation of cell killing","regulation of adaptive immune response","positive regulation of immune effector process","regulation of natural killer cell mediated cytotoxicity","immune response to tumor cell","positive regulation of adaptive immune response based on somatic recombination of immune receptors built from immunoglobulin superfamily domains","positive regulation of productio…	query	0.3333333333333333	1.633453119895459E-4	4036.799472413759	1862.0	-3874.0
H__sapiens__1_-773422	H__sapiens__1_-773422	LAMC3	LAMC3	Q9Y6N6	ENSP00000354360	10319	NP_006050	NM_006059	DKFZp434E202	-0.10555922152221318	0.8998211824886843	["GO:0062023","GO:0031589"]	["collagen-containing extracellular matrix","cell-substrate adhesion"]	query	0.3333333333333333	1.5276504735716468E-4	1841.4330131718175	1321.0	-3874.0
H__sapiens__1_-784787	H__sapiens__1_-784787	ENDOG	ENDOG	Q14249	ENSP00000361725	2021	NP_004426	NM_004435		-0.15072347687231524	0.860085499311346	["GO:0030262","GO:0006921","GO:0000737"]	["apoptotic nuclear changes","cellular component disassembly involved in execution phase of apoptosis","DNA catabolic process, endonucleolytic"]	query	0.3333333333333333	1.4999250037498125E-4	2118.9981448955573	1151.0	-3874.0
H__sapiens__1_-781445	H__sapiens__1_-781445	ANK2	ANK2	Q01484	ENSP00000501302	287	NP_066187	NM_020977	LQT4	-0.12080778513470859	0.8862042848600621	["GO:0006942","GO:0003205","GO:1903522","GO:0042692","GO:0010880","GO:0006941","GO:0051282","GO:1903514","GO:0070588","GO:0086003","GO:0060048","GO:0086012","GO:0032412","GO:1990778","GO:0032411","GO:0001508","GO:0034767","GO:0051209","GO:0051208","GO:0051928","GO:0019722","GO:0043266","GO:0005911","GO:0034764","GO:0044291","GO:0086026","GO:0003230","GO:0007507","GO:0060402","GO:1904427","GO:0090…	["regulation of striated muscle contraction","cardiac chamber development","regulation of blood circulation","muscle cell differentiation","regulation of release of sequestered calcium ion into cytosol by sarcoplasmic reticulum","striated muscle contraction","regulation of sequestering of calcium ion","release of sequestered calcium ion into cytosol by endoplasmic reticulum","calcium ion transmem…	query	0.3333333333333333	1.5605493133583021E-4	2825.4900446621245	1629.0	-3874.0
H__sapiens__1_-782123	H__sapiens__1_-782123	UBE3B	UBE3B	Q7Z3V4	ENSP00000474360	89910	NP_904324	NM_183415		-0.13315172735246433	0.8753322701847848	["GO:0061650","GO:0004842"]	["ubiquitin-like protein conjugating enzyme activity","ubiquitin-protein transferase activity"]	query	0.3333333333333333	1.464986815118664E-4	1412.3193840302918	988.0	-3874.0
H__sapiens__1_-773025	H__sapiens__1_-773025	ABHD5	ABHD5	Q8WTS1	ENSP00000497701	51099	NP_057090	NM_016006	NCIE2	-0.12729566323447844	0.880473310522446	["GO:0044242","GO:0008374","GO:0019433","GO:0016042","GO:0046464","GO:0050996","GO:1905952","GO:0010888","GO:0006638","GO:0016411","GO:0019915","GO:0050994","GO:0008654","GO:0006641","GO:0046461","GO:0046474","GO:0016298","GO:1905953","GO:0019216","GO:0010883","GO:0006639","GO:0045834","GO:0045017","GO:0016747","GO:0010896","GO:0016746","GO:0051235","GO:0046503","GO:0090207","GO:0046473","GO:0090…	["cellular lipid catabolic process","O-acyltransferase activity","triglyceride catabolic process","lipid catabolic process","acylglycerol catabolic process","positive regulation of lipid catabolic process","regulation of lipid localization","negative regulation of lipid storage","neutral lipid metabolic process","acylglycerol O-acyltransferase activity","lipid storage","regulation of lipid catabo…	query	0.3333333333333333	1.556178026766262E-4	2631.770494134492	1520.0	-3874.0
H__sapiens__1_-781624	H__sapiens__1_-781624	IGFBP3	IGFBP3	P17936	ENSP00000480717	3486	NP_001013416	NM_001013398	IBP3	-0.1506324254513664	0.8601638148835138	["GO:0014910","GO:0040013","GO:0048660","GO:0019838","GO:0014812","GO:0048659","GO:0045661","GO:0030336","GO:0051271","GO:0014909","GO:0033002","GO:2000146","GO:0005520","GO:0019208","GO:0019211","GO:0045445","GO:0008285"]	["regulation of smooth muscle cell migration","negative regulation of locomotion","regulation of smooth muscle cell proliferation","growth factor binding","muscle cell migration","smooth muscle cell proliferation","regulation of myoblast differentiation","negative regulation of cell migration","negative regulation of cellular component movement","smooth muscle cell migration","muscle cell prolife…	query	0.3333333333333333	1.5895724050230488E-4	2841.3890467307638	1680.0	-3874.0
H__sapiens__1_-778807	H__sapiens__1_-778807	GAD1	GAD1	Q99259	ENSP00000486612	2571	NP_038473	NM_013445	GAD	-0.14103162143756956	0.8684618492513215	["GO:0001505","GO:0030665","GO:0030662","GO:0046395","GO:0006836","GO:0099643","GO:0043648","GO:0043649","GO:0009065","GO:0060198","GO:0016829","GO:0030135","GO:0006536","GO:0006520","GO:0030136","GO:0009064","GO:0016054"]	["regulation of neurotransmitter levels","clathrin-coated vesicle membrane","coated vesicle membrane","carboxylic acid catabolic process","neurotransmitter transport","signal release from synapse","dicarboxylic acid metabolic process","dicarboxylic acid catabolic process","glutamine family amino acid catabolic process","clathrin-sculpted vesicle","lyase activity","coated vesicle","glutamate metab…	query	0.3333333333333333	1.5506280043417584E-4	2326.670325308504	1456.0	-3874.0
H__sapiens__1_-783102	H__sapiens__1_-783102	HK2	HK2	P52789	ENSP00000387140	3099	NP_001358454	NM_001371525		-0.11928381027640948	0.8875558675369275	["GO:0046939","GO:0042593","GO:0009132","GO:0061620","GO:0046034","GO:0061726","GO:0006757","GO:0009185","GO:0006735","GO:0045185","GO:0000422","GO:1903599","GO:0001525","GO:0005996","GO:0009135","GO:0016052","GO:1901342","GO:0010508","GO:0070585","GO:0019200","GO:1903146","GO:0006734","GO:1904018","GO:0019674","GO:0045765","GO:0019318","GO:0019320","GO:0009179","GO:1904923","GO:0098780","GO:0010…	["nucleotide phosphorylation","glucose homeostasis","nucleoside diphosphate metabolic process","glycolytic process through glucose-6-phosphate","ATP metabolic process","mitochondrion disassembly","ATP generation from ADP","ribonucleoside diphosphate metabolic process","NADH regeneration","maintenance of protein location","autophagy of mitochondrion","positive regulation of autophagy of mitochondr…	query	0.3333333333333333	1.4963339817447254E-4	1617.440344061142	1155.0	-3874.0
H__sapiens__1_-776974	H__sapiens__1_-776974	HRH2	HRH2	P25021	ENSP00000490705	3274	NP_001354640	NM_001367711		-0.1310643129956547	0.8771613597022492	["GO:0099589","GO:0008227","GO:0004930"]	["serotonin receptor activity","G protein-coupled amine receptor activity","G protein-coupled receptor activity"]	query	0.3333333333333333	1.6302575806977502E-4	4225.773312102254	1830.0	-3874.0
H__sapiens__1_-774312	H__sapiens__1_-774312	TRAF5	TRAF5	O00463	ENSP00000355971	7188	NP_665702	NM_145759	RNF84	-0.18747306095679958	0.8290514517324503	["GO:0051091","GO:0005887","GO:0032872","GO:0031098","GO:0071356","GO:0044389","GO:0098802","GO:0034612","GO:0000209","GO:0070304","GO:0046328","GO:0032813","GO:0098562","GO:0007254","GO:0043235","GO:0070302","GO:0051403","GO:0007249","GO:0005126","GO:0032874","GO:0043122"]	["positive regulation of DNA-binding transcription factor activity","integral component of plasma membrane","regulation of stress-activated MAPK cascade","stress-activated protein kinase signaling cascade","cellular response to tumor necrosis factor","ubiquitin-like protein ligase binding","plasma membrane signaling receptor complex","response to tumor necrosis factor","protein polyubiquitination…	query	0.3333333333333333	1.529753709652746E-4	2379.7224913394175	1387.0	-3874.0
H__sapiens__1_-783057	H__sapiens__1_-783057	STC1	STC1	P52823	ENSP00000427932	6781	NP_003146	NM_003155	STC	-0.13344409374001684	0.8750763898582687	["GO:0006942","GO:1903522","GO:0006941","GO:0086003","GO:0048705","GO:0003158","GO:0060048","GO:0051271","GO:0051928","GO:0070509","GO:0040013","GO:0003014","GO:0090257","GO:0043270","GO:0035265","GO:0060350","GO:0060047","GO:0006937","GO:0030336","GO:0006816","GO:0007389","GO:0003015","GO:0090132","GO:0010633","GO:0090279","GO:0043542","GO:0048589","GO:0008016","GO:0001501","GO:0001885","GO:0006…	["regulation of striated muscle contraction","regulation of blood circulation","striated muscle contraction","cardiac muscle cell contraction","skeletal system morphogenesis","endothelium development","cardiac muscle contraction","negative regulation of cellular component movement","positive regulation of calcium ion transport","calcium ion import","negative regulation of locomotion","renal syste…	query	0.3333333333333333	1.543924656476764E-4	2258.95094114393	1425.0	-3874.0
H__sapiens__1_-780133	H__sapiens__1_-780133	CTSV	CTSV	O60911	ENSP00000445052	1515	NP_001324	NM_001333	CTSU	-0.14869887680196056	0.8618285924115572	["GO:0030198","GO:0045682","GO:0019884","GO:0045604","GO:0002495","GO:0019882","GO:0002504","GO:0048002","GO:0002478","GO:0005775","GO:0030856"]	["extracellular matrix organization","regulation of epidermis development","antigen processing and presentation of exogenous antigen","regulation of epidermal cell differentiation","antigen processing and presentation of peptide antigen via MHC class II","antigen processing and presentation","antigen processing and presentation of peptide or polysaccharide antigen via MHC class II","antigen proce…	query	0.3333333333333333	1.6178611875101117E-4	4072.9038222032423	1666.0	-3874.0
H__sapiens__1_-776816	H__sapiens__1_-776816	CCR6	CCR6	P51684	ENSP00000495402	1235	NP_113597	NM_031409	STRL22	-0.15075299002346243	0.8600601158525801	["GO:2000401","GO:0001637","GO:0042113","GO:0030217","GO:0045190","GO:0072676","GO:0016447","GO:0002562","GO:0036336","GO:2000243","GO:0002687","GO:0019955","GO:0019724","GO:0002208","GO:0002449","GO:0002250","GO:0008528","GO:0030335","GO:0071695","GO:0030595","GO:0002685","GO:0050900","GO:0050920","GO:0009986","GO:2000241","GO:0002460","GO:0016444","GO:0140375","GO:0002204","GO:0002200","GO:0001…	["regulation of lymphocyte migration","G protein-coupled chemoattractant receptor activity","B cell activation","T cell differentiation","isotype switching","lymphocyte migration","somatic recombination of immunoglobulin gene segments","somatic diversification of immune receptors via germline recombination within a single locus","dendritic cell migration","positive regulation of reproductive proc…	query	0.3333333333333333	1.5735641227380016E-4	4129.915404965864	1664.0	-3874.0
H__sapiens__1_-778215	H__sapiens__1_-778215	PARD6B	PARD6B	Q9BYG5	ENSP00000379354	84612	NP_115910	NM_032521	PAR-6B	-0.12272846342631329	0.8845038050882523	["GO:0120193","GO:0045216","GO:0043297","GO:0070160","GO:0120192","GO:0005911","GO:0043296","GO:0019901","GO:0007043","GO:0045177"]	["tight junction organization","cell-cell junction organization","apical junction assembly","tight junction","tight junction assembly","cell-cell junction","apical junction complex","protein kinase binding","cell-cell junction assembly","apical part of cell"]	query	0.3333333333333333	1.4858841010401187E-4	1544.3564399330005	1077.0	-3874.0
H__sapiens__1_-786173	H__sapiens__1_-786173	ADH6	ADH6	P28332	ENSP00000426187	130	NP_001095940	NM_001102470	ADH-5	-0.10947490041336494	0.8963046609562693	["GO:0006720","GO:0034308","GO:0034754","GO:0042445","GO:0016101","GO:0001523","GO:0006067","GO:0097305","GO:0016616","GO:0006721","GO:0006066","GO:0016614"]	["isoprenoid metabolic process","primary alcohol metabolic process","cellular hormone metabolic process","hormone metabolic process","diterpenoid metabolic process","retinoid metabolic process","ethanol metabolic process","response to alcohol","oxidoreductase activity, acting on the CH-OH group of donors, NAD or NADP as acceptor","terpenoid metabolic process","alcohol metabolic process","oxidored…	query	0.3333333333333333	1.4688601645123384E-4	1154.5305172451515	1047.0	-3874.0
H__sapiens__1_-781501	H__sapiens__1_-781501	ATG12	ATG12	O94817	ENSP00000425948	9140	NP_004698	NM_004707	APG12L	-0.12166899668999955	0.8854414040376335	["GO:0007033","GO:0030666","GO:0045335","GO:1905037","GO:0061726","GO:1903008","GO:0000407","GO:0016236","GO:0030139"]	["vacuole organization","endocytic vesicle membrane","phagocytic vesicle","autophagosome organization","mitochondrion disassembly","organelle disassembly","phagophore assembly site","macroautophagy","endocytic vesicle"]	query	0.3333333333333333	1.3842746400885935E-4	413.4897842976124	572.0	-3874.0
H__sapiens__1_-778790	H__sapiens__1_-778790	LRRC4	LRRC4	Q9HBW1	ENSP00000418254	64101	NP_071426	NM_022143	NAG14	-0.06255280556687644	0.9393634578838825			query	0.3333333333333333	1.5218383807639628E-4	2124.652538905208	1204.0	-3874.0
H__sapiens__1_-784989	H__sapiens__1_-784989	MLST8	MLST8	Q9BVC4	ENSP00000459612	64223	NP_071767	NM_022372	Lst8	-0.16072773578512645	0.8515238790295883	["GO:0032147","GO:0031929","GO:0034605","GO:0019209","GO:0019887","GO:0019207","GO:0030295","GO:0009266","GO:0010506","GO:0009408","GO:0016236","GO:0032006","GO:0038201"]	["activation of protein kinase activity","TOR signaling","cellular response to heat","kinase activator activity","protein kinase regulator activity","kinase regulator activity","protein kinase activator activity","response to temperature stimulus","regulation of autophagy","response to heat","macroautophagy","regulation of TOR signaling","TOR complex"]	query	0.3333333333333333	1.5288182235132243E-4	2404.0716786530566	1354.0	-3874.0
H__sapiens__1_-775320	H__sapiens__1_-775320	ATG4A	ATG4A	Q8WYN0	ENSP00000416218	115201	NP_840055	NM_178271	AUTL2	-0.1716012933820949	0.8423149427693134			query	0.3333333333333333	1.5790304752881732E-4	3542.069226467586	1544.0	-3874.0
H__sapiens__1_-773114	H__sapiens__1_-773114	IGF1	IGF1	P05019	ENSP00000494228	3479	NP_001104755	NM_001111285	IGFI	-0.14745415266633408	0.8629019991703657	["GO:0060421","GO:0014910","GO:0009306","GO:0097696","GO:0051251","GO:0031091","GO:0045981","GO:0046620","GO:0001701","GO:0050435","GO:1902003","GO:0010823","GO:0010657","GO:0098727","GO:0071902","GO:0007265","GO:0030335","GO:0008643","GO:0043009","GO:0090257","GO:0035265","GO:0019318","GO:0030133","GO:0008645","GO:0048015","GO:0016051","GO:0002793","GO:0006090","GO:0051101","GO:0010559","GO:0150…	["positive regulation of heart growth","regulation of smooth muscle cell migration","protein secretion","receptor signaling pathway via STAT","positive regulation of lymphocyte activation","platelet alpha granule","positive regulation of nucleotide metabolic process","regulation of organ growth","in utero embryonic development","amyloid-beta metabolic process","regulation of amyloid-beta formatio…	query	0.3333333333333333	1.524390243902439E-4	1824.6199409237975	1367.0	-3874.0
H__sapiens__1_-782833	H__sapiens__1_-782833	MMP14	MMP14	P50281	ENSP00000450323	4323	NP_004986	NM_004995	MT1-MMP	-0.1459739506136867	0.8641802142556871	["GO:0051146","GO:0007492","GO:0042113","GO:0042692","GO:0051251","GO:0001704","GO:0051604","GO:1903708","GO:1905475","GO:0002696","GO:0007219","GO:0051155","GO:0016485","GO:1990778","GO:0001706","GO:1902107","GO:0051147","GO:0050864","GO:0050871","GO:0050867","GO:0045927","GO:1904375","GO:0030098","GO:0045621","GO:0032963","GO:0045619","GO:0051149","GO:0045577","GO:1902105","GO:0008593","GO:0051…	["striated muscle cell differentiation","endoderm development","B cell activation","muscle cell differentiation","positive regulation of lymphocyte activation","formation of primary germ layer","protein maturation","positive regulation of hemopoiesis","regulation of protein localization to membrane","positive regulation of leukocyte activation","Notch signaling pathway","positive regulation of st…	query	0.3333333333333333	1.5489467162329616E-4	2313.9147890995305	1486.0	-3874.0
H__sapiens__1_-784485	H__sapiens__1_-784485	CACNB2	CACNB2	Q08289	ENSP00000499177	783	NP_963891	NM_201597	MYSB	-0.11846506673389294	0.8882828457358387	["GO:0005244","GO:0061577","GO:1903522","GO:0006941","GO:1901021","GO:0070588","GO:0086003","GO:0005262","GO:0060048","GO:0005245","GO:0086012","GO:0072509","GO:0032412","GO:1990778","GO:0032411","GO:0001508","GO:0034767","GO:0022832","GO:0051928","GO:0034764","GO:0022843","GO:0086026","GO:0050808","GO:1904427","GO:0030315","GO:0086002","GO:0035637","GO:0043270","GO:0086001","GO:0060047","GO:2001…	["voltage-gated ion channel activity","calcium ion transmembrane transport via high voltage-gated calcium channel","regulation of blood circulation","striated muscle contraction","positive regulation of calcium ion transmembrane transporter activity","calcium ion transmembrane transport","cardiac muscle cell contraction","calcium channel activity","cardiac muscle contraction","voltage-gated calci…	query	0.3333333333333333	1.5556938394523958E-4	2744.0667307029626	1592.0	-3874.0
H__sapiens__1_-779009	H__sapiens__1_-779009	AFDN	MLLT4	P55196	ENSP00000426462	4301	NP_001353250	NM_001366321	MLLT4	-0.1174718903314206	0.8891655055428358	["GO:2000047","GO:0040013","GO:0045216","GO:0045785","GO:0043297","GO:0001885","GO:0120192","GO:0045446","GO:0043087","GO:0003158","GO:0061028","GO:0051271","GO:0120193","GO:0003779","GO:0022409","GO:1990778","GO:2000146","GO:0002064","GO:0044331","GO:0005911","GO:0072659","GO:0007043"]	["regulation of cell-cell adhesion mediated by cadherin","negative regulation of locomotion","cell-cell junction organization","positive regulation of cell adhesion","apical junction assembly","endothelial cell development","tight junction assembly","endothelial cell differentiation","regulation of GTPase activity","endothelium development","establishment of endothelial barrier","negative regulat…	query	0.3333333333333333	1.4841199168892847E-4	1525.7355543122228	1167.0	-3874.0
H__sapiens__1_-796023	H__sapiens__1_-796023	DDX3X	DDX3X	O00571	ENSP00000496663	1654	NP_001350748	NM_001363819	DDX3	-0.1209904646109149	0.8860424083117038	["GO:0097193","GO:0043281","GO:0062197","GO:0032608","GO:0034976","GO:0032647","GO:1902914","GO:0030295","GO:0043555","GO:0048524","GO:0000209","GO:0010950","GO:0031396","GO:2001234","GO:0006970","GO:0031398","GO:1901983","GO:0032479","GO:1903320","GO:2001236","GO:2001233","GO:0008625","GO:2001237","GO:1902808","GO:0051346","GO:0045069","GO:0101002","GO:0032607","GO:0032606","GO:0019887","GO:0019…	["intrinsic apoptotic signaling pathway","regulation of cysteine-type endopeptidase activity involved in apoptotic process","cellular response to chemical stress","interferon-beta production","response to endoplasmic reticulum stress","regulation of interferon-alpha production","regulation of protein polyubiquitination","protein kinase activator activity","regulation of translation in response to…	query	0.3333333333333333	1.4369880729989942E-4	799.0594829239079	900.0	-3874.0
H__sapiens__1_-773064	H__sapiens__1_-773064	MAP4K5	MAP4K5	Q9Y4K4	ENSP00000452289	11183	NP_942089	NM_198794	KHS1	-0.15158780342975323	0.8593424257479915	["GO:0032147","GO:0031098","GO:0043507","GO:0043506","GO:0007254","GO:0000187","GO:0043406","GO:0051403","GO:0043405","GO:0004674","GO:0071902"]	["activation of protein kinase activity","stress-activated protein kinase signaling cascade","positive regulation of JUN kinase activity","regulation of JUN kinase activity","JNK cascade","activation of MAPK activity","positive regulation of MAP kinase activity","stress-activated MAPK cascade","regulation of MAP kinase activity","protein serine/threonine kinase activity","positive regulation of p…	query	0.3333333333333333	1.486767766874814E-4	1683.514583776388	1242.0	-3874.0
H__sapiens__1_-780122	H__sapiens__1_-780122	PSMB7	PSMB7	Q99436	ENSP00000393157	5695	NP_002790	NM_002799	Z	-0.18184482135367472	0.8337307075805671	["GO:0070555","GO:0045930","GO:0043620","GO:0071456","GO:0033238","GO:0060218","GO:0034612","GO:0044106","GO:0070482","GO:0071347","GO:0000502","GO:0002244","GO:0002833","GO:0071356","GO:0001736","GO:0101002","GO:0071453","GO:1905369","GO:1905368","GO:0048002","GO:0005839","GO:0001666","GO:0050851","GO:0060070","GO:0045088","GO:0090175","GO:0035567","GO:0019884","GO:0030177","GO:0042590","GO:0043…	["response to interleukin-1","negative regulation of mitotic cell cycle","regulation of DNA-templated transcription in response to stress","cellular response to hypoxia","regulation of cellular amine metabolic process","hematopoietic stem cell differentiation","response to tumor necrosis factor","cellular amine metabolic process","response to oxygen levels","cellular response to interleukin-1","p…	query	0.3333333333333333	1.4734050390452334E-4	1470.7420828191616	1273.0	-3874.0
H__sapiens__1_-783887	H__sapiens__1_-783887	PLB1	PLB1	Q6P1J6	ENSP00000416440	151056	NP_694566	NM_153021	FLJ30866	-0.035481134615923296	0.9651409418128089	["GO:0006720","GO:0005903","GO:0004620","GO:0031253","GO:0016101","GO:0046470","GO:0016298","GO:0052689","GO:0006721"]	["isoprenoid metabolic process","brush border","phospholipase activity","cell projection membrane","diterpenoid metabolic process","phosphatidylcholine metabolic process","lipase activity","carboxylic ester hydrolase activity","terpenoid metabolic process"]	query	0.3333333333333333	1.414027149321267E-4	1474.3490280933283	704.0	-3874.0
H__sapiens__1_-782453	H__sapiens__1_-782453	DGKE	DGKE	P52429	ENSP00000459958	8526	NP_003638	NM_003647		-0.1285660660687534	0.8793554649406956	["GO:0006639","GO:0006638","GO:0030258","GO:0008654","GO:0045017","GO:0046473","GO:0046474","GO:0007596","GO:0007599","GO:0050817"]	["acylglycerol metabolic process","neutral lipid metabolic process","lipid modification","phospholipid biosynthetic process","glycerolipid biosynthetic process","phosphatidic acid metabolic process","glycerophospholipid biosynthetic process","blood coagulation","hemostasis","coagulation"]	query	0.3333333333333333	1.5001500150015003E-4	1853.8515927060048	1204.0	-3874.0
H__sapiens__1_-781784	H__sapiens__1_-781784	IFNA5	IFNA5	P01569	ENSP00000484479	3442	NP_002160	NM_002169	IFN-alphaG	-0.17528907697444804	0.8392143881449063	["GO:0097696","GO:0018209","GO:0042113","GO:0042501","GO:0043331","GO:0071357","GO:0046425","GO:0033139","GO:1904892","GO:0033135","GO:0046651","GO:0033138","GO:0034340","GO:0032943","GO:0007259","GO:0005126","GO:0030101","GO:0018105","GO:0030098","GO:0007599","GO:0050817","GO:0002285","GO:0070661"]	["receptor signaling pathway via STAT","peptidyl-serine modification","B cell activation","serine phosphorylation of STAT protein","response to dsRNA","cellular response to type I interferon","regulation of receptor signaling pathway via JAK-STAT","regulation of peptidyl-serine phosphorylation of STAT protein","regulation of receptor signaling pathway via STAT","regulation of peptidyl-serine phos…	query	0.3333333333333333	1.6531658125309968E-4	4561.537159853717	1805.0	-3874.0
H__sapiens__1_-773766	H__sapiens__1_-773766	ROCK1	ROCK1	Q13464	ENSP00000489185	6093	NP_005397	NM_005406	p160ROCK	-0.1620289266759574	0.8504166044588894	["GO:0035296","GO:0030010","GO:0045216","GO:1905314","GO:0061135","GO:0150116","GO:0030100","GO:0008277","GO:0099003","GO:0003158","GO:0050435","GO:0110150","GO:0045682","GO:0070830","GO:1902003","GO:0001525","GO:0090109","GO:0001954","GO:0036465","GO:0051346","GO:0007265","GO:0003018","GO:0031214","GO:0090257","GO:0050900","GO:0110148","GO:0071375","GO:0061028","GO:0090132","GO:1902992","GO:0061…	["regulation of tube diameter","establishment of cell polarity","cell-cell junction organization","semi-lunar valve development","endopeptidase regulator activity","regulation of cell-substrate junction organization","regulation of endocytosis","regulation of G protein-coupled receptor signaling pathway","vesicle-mediated transport in synapse","endothelium development","amyloid-beta metabolic pro…	query	0.3333333333333333	1.4925373134328358E-4	1779.965187701245	1226.0	-3874.0
H__sapiens__1_-777857	H__sapiens__1_-777857	TNFRSF10B	TNFRSF10B	O14763	ENSP00000427999	8795	NP_671716	NM_147187	TRICKB	-0.12237904274636732	0.8848129230121935	["GO:0097193","GO:0009612","GO:0043281","GO:0034976","GO:0097191","GO:2000116","GO:0010950","GO:2001234","GO:2001056","GO:0007249","GO:0038061","GO:2001236","GO:2001233","GO:0008625","GO:2001237","GO:0104004","GO:1902041","GO:0043280","GO:0043122","GO:0032147","GO:0071496","GO:0045862","GO:0052548","GO:0071214","GO:0052547","GO:0010952"]	["intrinsic apoptotic signaling pathway","response to mechanical stimulus","regulation of cysteine-type endopeptidase activity involved in apoptotic process","response to endoplasmic reticulum stress","extrinsic apoptotic signaling pathway","regulation of cysteine-type endopeptidase activity","positive regulation of endopeptidase activity","negative regulation of apoptotic signaling pathway","pos…	query	0.3333333333333333	1.5137753557372085E-4	1592.523881255107	1235.0	-3874.0
H__sapiens__1_-788152	H__sapiens__1_-788152	IGSF5	IGSF5	Q9NSI5	ENSP00000369962	150084	NP_001073913	NM_001080444	JAM4	-0.03565259339635032	0.9649754741098361	["GO:0070160","GO:0005911","GO:0043296"]	["tight junction","cell-cell junction","apical junction complex"]	query	0.3333333333333333	1.401541695865452E-4	434.1714484467747	634.0	-3874.0
H__sapiens__1_-773856	H__sapiens__1_-773856	JMJD6	JMJD6	Q6NYC1	ENSP00000483941	23210	NP_055982	NM_015167	PTDSR1	-0.11924260072026116	0.8875924440739318	["GO:0016705","GO:0001525"]	["oxidoreductase activity, acting on paired donors, with incorporation or reduction of molecular oxygen","angiogenesis"]	query	0.3333333333333333	1.4436263894903998E-4	955.2560197848873	852.0	-3874.0
H__sapiens__1_-781946	H__sapiens__1_-781946	NCAM1	NCAM1	P13591	ENSP00000486406	4684	NP_851996	NM_181351	NCAM	-0.12391613538574733	0.883453928298958	["GO:0007409","GO:0097485","GO:0034341","GO:0009986","GO:0071346"]	["axonogenesis","neuron projection guidance","response to interferon-gamma","cell surface","cellular response to interferon-gamma"]	query	0.3333333333333333	1.4615609470914936E-4	955.9520709981853	1010.0	-3874.0
H__sapiens__1_-777258	H__sapiens__1_-777258	ATF2	ATF2	P15336	ENSP00000437952	1386	NP_001871	NM_001880	TREB7	-0.1567833205921159	0.8548892756526782	["GO:1905710","GO:0045930","GO:0061629","GO:0035794","GO:0046902","GO:0007006","GO:1901343","GO:0001525","GO:0006475","GO:0018393","GO:1902108","GO:0090559","GO:0000075","GO:1901342","GO:0033613","GO:0044773","GO:0031570","GO:0045765","GO:2000181","GO:0006839","GO:0016747","GO:0007093","GO:0000978","GO:0090734","GO:0044774","GO:0019867","GO:0016746","GO:0016573","GO:0008637","GO:0031968","GO:0006…	["positive regulation of membrane permeability","negative regulation of mitotic cell cycle","RNA polymerase II-specific DNA-binding transcription factor binding","positive regulation of mitochondrial membrane permeability","regulation of mitochondrial membrane permeability","mitochondrial membrane organization","negative regulation of vasculature development","angiogenesis","internal protein amin…	query	0.3333333333333333	1.473187978786093E-4	1624.0822527323405	1215.0	-3874.0
H__sapiens__1_-792365	H__sapiens__1_-792365	GP1BB	GP1BB	P13224	ENSP00000383382	2812	NP_000398	NM_000407	GPIbbeta	-0.02372326260856762	0.9765559219056984	["GO:0072376","GO:0007596","GO:0007599","GO:0050817","GO:0072378"]	["protein activation cascade","blood coagulation","hemostasis","coagulation","blood coagulation, fibrin clot formation"]	query	0.3333333333333333	1.348799568384138E-4	180.1194406556345	399.0	-3874.0
H__sapiens__1_-782580	H__sapiens__1_-782580	CA10	CA10	Q9NS85	ENSP00000461908	56934	NP_064563	NM_020178	HUCEP-15	-0.12092211901676517	0.8861029674759942	["GO:0016829","GO:0016835"]	["lyase activity","carbon-oxygen lyase activity"]	query	0.3333333333333333	1.582528881152081E-4	3422.398001471679	1757.0	-3874.0
H__sapiens__1_-787044	H__sapiens__1_-787044	UBE2U	UBE2U	Q5VVX9	ENSP00000481174	148581	NP_689702	NM_152489	MGC35130	-0.05301505900162469	0.9483657309336826	["GO:0061650","GO:0000151","GO:0004842"]	["ubiquitin-like protein conjugating enzyme activity","ubiquitin ligase complex","ubiquitin-protein transferase activity"]	query	0.3333333333333333	1.4267370523612499E-4	1006.5433723985744	810.0	-3874.0
H__sapiens__1_-789751	H__sapiens__1_-789751	AKR1C3	AKR1C3	P42330	ENSP00000474882	8644	NP_003730	NM_003739	PGFS	-0.15217565284066495	0.8588374102603156	["GO:0006631","GO:0010038","GO:0043065","GO:0048608","GO:0006081","GO:0070542","GO:1904019","GO:0016053","GO:0016628","GO:0046890","GO:1904037","GO:0006979","GO:0008202","GO:0031406","GO:0000302","GO:0001516","GO:0042445","GO:0016101","GO:0062014","GO:0016709","GO:0097305","GO:0006721","GO:0044242","GO:0006693","GO:1901570","GO:0097306","GO:0042594","GO:0001523","GO:0120254","GO:0046456","GO:0051…	["fatty acid metabolic process","response to metal ion","positive regulation of apoptotic process","reproductive structure development","cellular aldehyde metabolic process","response to fatty acid","epithelial cell apoptotic process","organic acid biosynthetic process","oxidoreductase activity, acting on the CH-CH group of donors, NAD or NADP as acceptor","regulation of lipid biosynthetic proces…	query	0.3333333333333333	1.6291951775822744E-4	3732.6251447987383	1678.0	-3874.0
H__sapiens__1_-781560	H__sapiens__1_-781560	DAAM2	DAAM2	Q86T65	ENSP00000488831	23500	NP_056160	NM_015345	KIAA0381	-0.17755128110196683	0.8373180596419707	["GO:0045685","GO:0050767","GO:0014013","GO:0048709","GO:0010001","GO:0045686","GO:0042063","GO:0060070","GO:0048713","GO:0035567","GO:0030177","GO:0010721","GO:0060828","GO:0014014","GO:0051960"]	["regulation of glial cell differentiation","regulation of neurogenesis","regulation of gliogenesis","oligodendrocyte differentiation","glial cell differentiation","negative regulation of glial cell differentiation","gliogenesis","canonical Wnt signaling pathway","regulation of oligodendrocyte differentiation","non-canonical Wnt signaling pathway","positive regulation of Wnt signaling pathway","n…	query	0.3333333333333333	1.7067759003242875E-4	5336.049802399803	1992.0	-3874.0
H__sapiens__1_-784505	H__sapiens__1_-784505	JAM3	JAM3	Q9BX67	ENSP00000433206	83700	NP_116190	NM_032801	JAMC	-0.13912779683081375	0.8701168231801217	["GO:1990266","GO:0033622","GO:0002691","GO:0045216","GO:0071622","GO:0098631","GO:0097530","GO:0033623","GO:0097529","GO:0002687","GO:0045123","GO:0098858","GO:0033628","GO:0015629","GO:0005911","GO:0043296","GO:0090559","GO:0002688","GO:0007162","GO:0071621","GO:0030335","GO:1902622","GO:0070160","GO:0030595","GO:0030593","GO:0002685","GO:0050900","GO:0050920","GO:0060326","GO:0001894","GO:0034…	["neutrophil migration","integrin activation","regulation of cellular extravasation","cell-cell junction organization","regulation of granulocyte chemotaxis","cell adhesion mediator activity","granulocyte migration","regulation of integrin activation","myeloid leukocyte migration","positive regulation of leukocyte migration","cellular extravasation","actin-based cell projection","regulation of ce…	query	0.3333333333333333	1.5807777426493836E-4	2810.8844086209247	1616.0	-3874.0
H__sapiens__1_-788130	H__sapiens__1_-788130	CADM1	CADM1	Q9BY67	ENSP00000484516	23705	NP_055148	NM_014333	TSLC1	-0.12555255707607674	0.8820094073733242	["GO:0002717","GO:0009306","GO:0045216","GO:0031343","GO:1904951","GO:0002699","GO:0042269","GO:0051222","GO:0002706","GO:0031341","GO:0050708","GO:0002449","GO:0050707","GO:1903532","GO:0002250","GO:0002228","GO:0070661","GO:0002833","GO:0002703","GO:0050714","GO:0098742","GO:0042267","GO:0002456","GO:0001906","GO:0050663","GO:0045089","GO:0001910","GO:0046651","GO:0002793","GO:0002708","GO:0001…	["positive regulation of natural killer cell mediated immunity","protein secretion","cell-cell junction organization","positive regulation of cell killing","positive regulation of establishment of protein localization","positive regulation of immune effector process","regulation of natural killer cell mediated cytotoxicity","positive regulation of protein transport","regulation of lymphocyte medi…	query	0.3333333333333333	1.5956598053295037E-4	3187.8464018869886	1822.0	-3874.0
H__sapiens__1_-783405	H__sapiens__1_-783405	CXCL16	CXCL16	Q9H2A7	ENSP00000501470	58191	NP_071342	NM_022059	SRPSOX	-0.0702960998896872	0.9321177790685766	["GO:0038024","GO:0042379","GO:0072676","GO:0030595","GO:0030228","GO:0050900","GO:0005125","GO:0060326","GO:0001664","GO:0048247","GO:0001558","GO:0005126","GO:0072678","GO:0045927"]	["cargo receptor activity","chemokine receptor binding","lymphocyte migration","leukocyte chemotaxis","lipoprotein particle receptor activity","leukocyte migration","cytokine activity","cell chemotaxis","G protein-coupled receptor binding","lymphocyte chemotaxis","regulation of cell growth","cytokine receptor binding","T cell migration","positive regulation of growth"]	query	0.3333333333333333	1.636929120969062E-4	3816.4246101620906	1742.0	-3874.0
H__sapiens__1_-775125	H__sapiens__1_-775125	PSMC1	PSMC1	P62191	ENSP00000452049	5700	NP_002793	NM_002802		-0.17852763404029756	0.8365009406572936	["GO:0070555","GO:0045930","GO:0043620","GO:0071456","GO:0033238","GO:0060218","GO:0034612","GO:0044106","GO:0070482","GO:0071347","GO:0005838","GO:0000502","GO:0002244","GO:0002833","GO:0071356","GO:0001736","GO:0071453","GO:1905369","GO:1905368","GO:0048002","GO:0001666","GO:0050851","GO:0060070","GO:0045088","GO:0090175","GO:0035567","GO:0019884","GO:0030177","GO:0042590","GO:0043161","GO:0030…	["response to interleukin-1","negative regulation of mitotic cell cycle","regulation of DNA-templated transcription in response to stress","cellular response to hypoxia","regulation of cellular amine metabolic process","hematopoietic stem cell differentiation","response to tumor necrosis factor","cellular amine metabolic process","response to oxygen levels","cellular response to interleukin-1","p…	query	0.3333333333333333	1.5878056525881233E-4	3701.461876703081	1777.0	-3874.0
H__sapiens__1_-778182	H__sapiens__1_-778182	CKS2	CKS2	P33552	ENSP00000364976	1164	NP_001818	NM_001827		-0.21945904723693577	0.8029530401653177	["GO:0032182","GO:0061695","GO:0016538","GO:1902554","GO:1902911","GO:0000151","GO:0019209","GO:0019887","GO:0019207","GO:0030295","GO:0031461"]	["ubiquitin-like protein binding","transferase complex, transferring phosphorus-containing groups","cyclin-dependent protein serine/threonine kinase regulator activity","serine/threonine protein kinase complex","protein kinase complex","ubiquitin ligase complex","kinase activator activity","protein kinase regulator activity","kinase regulator activity","protein kinase activator activity","cullin-…	query	0.3333333333333333	1.5482272797646694E-4	2929.7485508279037	1500.0	-3874.0
H__sapiens__1_-776571	H__sapiens__1_-776571	SLC11A2	SLC11A2	P49281	ENSP00000494744	4891	NP_001167601	NM_001174130	NRAMP2	-0.14374262431912777	0.8661106351895538	["GO:0006879","GO:0005903","GO:0022804","GO:0000041","GO:0005770","GO:0046916","GO:0010038","GO:0006826","GO:0098657","GO:0010008","GO:0072509","GO:0070482","GO:0022853","GO:0036293","GO:0031253","GO:0055076","GO:0055072","GO:0015078","GO:0045177"]	["cellular iron ion homeostasis","brush border","active transmembrane transporter activity","transition metal ion transport","late endosome","cellular transition metal ion homeostasis","response to metal ion","iron ion transport","import into cell","endosome membrane","divalent inorganic cation transmembrane transporter activity","response to oxygen levels","active ion transmembrane transporter a…	query	0.3333333333333333	1.4961101137043686E-4	1634.5718228202286	1168.0	-3874.0
H__sapiens__1_-786257	H__sapiens__1_-786257	C1QA	C1QA	P02745	ENSP00000416841	712	NP_057075	NM_015991		-0.12760931812922108	0.8801971890645975	["GO:0061900","GO:0042116","GO:0006959","GO:0010001","GO:0150146","GO:0021700","GO:0042063","GO:0006956","GO:0042551","GO:0002269","GO:0019724","GO:0003002","GO:0002449","GO:0002250","GO:0016064","GO:0042277","GO:0050808","GO:0071695","GO:0002920","GO:0150063","GO:0048708","GO:0048880","GO:0007389","GO:0021782","GO:0002460","GO:0002455","GO:0070997","GO:0014002","GO:0150076","GO:1901214"]	["glial cell activation","macrophage activation","humoral immune response","glial cell differentiation","cell junction disassembly","developmental maturation","gliogenesis","complement activation","neuron maturation","leukocyte activation involved in inflammatory response","B cell mediated immunity","regionalization","lymphocyte mediated immunity","adaptive immune response","immunoglobulin mediat…	query	0.3333333333333333	1.5802781289506955E-4	2819.254926984723	1568.0	-3874.0
H__sapiens__1_-778469	H__sapiens__1_-778469	PSMF1	PSMF1	Q92530	ENSP00000499011	9491	NP_848693	NM_178578	PI31	-0.14467726586342258	0.8653015103876784	["GO:0070555","GO:0045930","GO:0061135","GO:0043620","GO:0071456","GO:0033238","GO:0060218","GO:0034612","GO:0061134","GO:0044106","GO:0070482","GO:0071347","GO:0000502","GO:0002244","GO:0002833","GO:0071356","GO:0001736","GO:0071453","GO:1903362","GO:1905369","GO:1905368","GO:0048002","GO:0001666","GO:0030414","GO:0050851","GO:0060070","GO:0045088","GO:0090175","GO:0035567","GO:0019884","GO:0030…	["response to interleukin-1","negative regulation of mitotic cell cycle","endopeptidase regulator activity","regulation of DNA-templated transcription in response to stress","cellular response to hypoxia","regulation of cellular amine metabolic process","hematopoietic stem cell differentiation","response to tumor necrosis factor","peptidase regulator activity","cellular amine metabolic process","…	query	0.3333333333333333	1.4645577035735208E-4	1353.2206314103141	1130.0	-3874.0
H__sapiens__1_-773045	H__sapiens__1_-773045	MAP4K3	MAP4K3	Q8IVH8	ENSP00000476533	8491	NP_003609	NM_003618	RAB8IPL1	-0.1757295963797927	0.8388447793375872	["GO:0031098","GO:0009416","GO:0051403","GO:0004674"]	["stress-activated protein kinase signaling cascade","response to light stimulus","stress-activated MAPK cascade","protein serine/threonine kinase activity"]	query	0.3333333333333333	1.5812776723592663E-4	3576.893263343715	1623.0	-3874.0
H__sapiens__1_-777565	H__sapiens__1_-777565	TNFAIP3	TNFAIP3	P21580	ENSP00000484332	7128	NP_006281	NM_006290	OTUD7C	-0.1745180581544248	0.8398616877402187	["GO:0046850","GO:0042113","GO:0048660","GO:0042542","GO:0034612","GO:0031396","GO:2001234","GO:0070664","GO:0032479","GO:0001525","GO:0008625","GO:2001237","GO:1904019","GO:0043122","GO:0034122","GO:1903321","GO:0032606","GO:0043433","GO:0031348","GO:0006979","GO:0071216","GO:0048872","GO:0000302","GO:0051250","GO:0071706","GO:0032675","GO:0034135","GO:0034614","GO:0008285","GO:1904036","GO:0032…	["regulation of bone remodeling","B cell activation","regulation of smooth muscle cell proliferation","response to hydrogen peroxide","response to tumor necrosis factor","regulation of protein ubiquitination","negative regulation of apoptotic signaling pathway","negative regulation of leukocyte proliferation","regulation of type I interferon production","angiogenesis","extrinsic apoptotic signali…	query	0.3333333333333333	1.6051364365971107E-4	3368.568389352331	1796.0	-3874.0
H__sapiens__1_-780468	H__sapiens__1_-780468	FGF2	FGF2	P09038	ENSP00000494222	2247	NP_001997	NM_002006	FGFB	-0.15254527603182094	0.8585200226965666	["GO:0060421","GO:0048660","GO:0043405","GO:0051282","GO:0046620","GO:0043551","GO:0070588","GO:0014706","GO:0072163","GO:0060038","GO:0048661","GO:0072001","GO:0051208","GO:0072088","GO:0019955","GO:0072080","GO:0006026","GO:0043536","GO:0001525","GO:1905562","GO:0048017","GO:0098727","GO:0001708","GO:1901136","GO:0071902","GO:0060191","GO:0040013","GO:0030335","GO:1905330","GO:0030323","GO:0035…	["positive regulation of heart growth","regulation of smooth muscle cell proliferation","regulation of MAP kinase activity","regulation of sequestering of calcium ion","regulation of organ growth","regulation of phosphatidylinositol 3-kinase activity","calcium ion transmembrane transport","striated muscle tissue development","mesonephric epithelium development","cardiac muscle cell proliferation"…	query	0.3333333333333333	1.5895724050230488E-4	2912.8886297023696	1710.0	-3874.0
H__sapiens__1_-775286	H__sapiens__1_-775286	TNNC2	TNNC2	P02585	ENSP00000361638	7125	NP_003270	NM_003279	FAP85	-0.15230208159830325	0.8587288353771615	["GO:0003779","GO:0070252","GO:0006941","GO:0015629","GO:0090257","GO:0006936","GO:0043292","GO:0030048","GO:0030016","GO:0030017"]	["actin binding","actin-mediated cell contraction","striated muscle contraction","actin cytoskeleton","regulation of muscle system process","muscle contraction","contractile fiber","actin filament-based movement","myofibril","sarcomere"]	query	0.3333333333333333	1.5760441292356187E-4	3166.6637537109973	1505.0	-3874.0
H__sapiens__1_-795559	H__sapiens__1_-795559	IFNA7	IFNA7	P01567	ENSP00000239347	3444	NP_066401	NM_021057	IFNA-J	-0.13973498184222638	0.869588661649018	["GO:0097696","GO:0018209","GO:0042113","GO:0042501","GO:0043331","GO:0071357","GO:0046425","GO:0033139","GO:1904892","GO:0033135","GO:0046651","GO:0033138","GO:0034340","GO:0032943","GO:0007259","GO:0005126","GO:0030101","GO:0018105","GO:0030098","GO:0007599","GO:0050817","GO:0002285","GO:0070661"]	["receptor signaling pathway via STAT","peptidyl-serine modification","B cell activation","serine phosphorylation of STAT protein","response to dsRNA","cellular response to type I interferon","regulation of receptor signaling pathway via JAK-STAT","regulation of peptidyl-serine phosphorylation of STAT protein","regulation of receptor signaling pathway via STAT","regulation of peptidyl-serine phos…	query	0.3333333333333333	1.6488046166529267E-4	4639.357333407058	1772.0	-3874.0
H__sapiens__1_-776649	H__sapiens__1_-776649	IFNG	IFNG	P01579	ENSP00000229135	3458	NP_000610	NM_000619		-0.1378255028236622	0.8712507092707482	["GO:2000514","GO:2000273","GO:0009306","GO:0006476","GO:0042116","GO:0097696","GO:0043370","GO:0051251","GO:1903428","GO:0045981","GO:0043065","GO:0050435","GO:0042306","GO:0002269","GO:1900180","GO:1902003","GO:0055072","GO:0010657","GO:1904375","GO:0045621","GO:0030073","GO:1900182","GO:0046631","GO:1904589","GO:0030335","GO:0002793","GO:0060330","GO:0008202","GO:0006090","GO:0051101","GO:0150…	["regulation of CD4-positive, alpha-beta T cell activation","positive regulation of signaling receptor activity","protein secretion","protein deacetylation","macrophage activation","receptor signaling pathway via STAT","regulation of CD4-positive, alpha-beta T cell differentiation","positive regulation of lymphocyte activation","positive regulation of reactive oxygen species biosynthetic process"…	query	0.3333333333333333	1.5926102882624622E-4	3538.0308812147305	1859.0	-3874.0
H__sapiens__1_-776148	H__sapiens__1_-776148	RAPGEF1	RAPGEF1	Q13905	ENSP00000410640	2889	NP_941372	NM_198679	C3G	-0.13909754318006726	0.8701431477888046	["GO:0032147","GO:0031346","GO:0005085","GO:0001885","GO:0045446","GO:0043087","GO:0051056","GO:0003158","GO:0010975","GO:1990090","GO:1990089","GO:0051057","GO:0046683","GO:0002064","GO:0038179","GO:0046578","GO:0014074","GO:0051591","GO:0007265"]	["activation of protein kinase activity","positive regulation of cell projection organization","guanyl-nucleotide exchange factor activity","endothelial cell development","endothelial cell differentiation","regulation of GTPase activity","regulation of small GTPase mediated signal transduction","endothelium development","regulation of neuron projection development","cellular response to nerve gro…	query	0.3333333333333333	1.643925694558606E-4	4383.19993811978	2052.0	-3874.0
H__sapiens__1_-780934	H__sapiens__1_-780934	PLPP2	PLPP2	O43688	ENSP00000488312	8612	NP_808211	NM_177543	PPAP2C	-0.15702294917589837	0.8546844442889677	["GO:0030258","GO:0006643","GO:0016791","GO:0019751","GO:0098857","GO:0045121","GO:0044853","GO:0046467","GO:0034311","GO:0006665","GO:0006066"]	["lipid modification","membrane lipid metabolic process","phosphatase activity","polyol metabolic process","membrane microdomain","membrane raft","plasma membrane raft","membrane lipid biosynthetic process","diol metabolic process","sphingolipid metabolic process","alcohol metabolic process"]	query	0.3333333333333333	1.6570008285004143E-4	4871.4530495796225	1776.0	-3874.0
H__sapiens__1_-782789	H__sapiens__1_-782789	ZIC3	ZIC3	O60481	ENSP00000359638	7547	NP_003404	NM_003413	ZNF203	-0.1481785236434055	0.8622771643395398	["GO:0048568","GO:0009799","GO:0048562","GO:0048565","GO:0007507","GO:0031016","GO:0030323","GO:0003007","GO:0061008","GO:0001889","GO:0007389","GO:0048598","GO:0035050","GO:0019827","GO:0009855","GO:0055123","GO:0060562","GO:0098727","GO:0060541","GO:0048732","GO:0007368"]	["embryonic organ development","specification of symmetry","embryonic organ morphogenesis","digestive tract development","heart development","pancreas development","respiratory tube development","heart morphogenesis","hepaticobiliary system development","liver development","pattern specification process","embryonic morphogenesis","embryonic heart tube development","stem cell population maintenanc…	query	0.3333333333333333	1.539408866995074E-4	2175.4579300838213	1341.0	-3874.0
H__sapiens__1_-775103	H__sapiens__1_-775103	SIX4	SIX4	Q9UIU6	ENSP00000450761	51804	NP_059116	NM_017420	AREC3	-0.04017951040218065	0.9606169829329958	["GO:0051146","GO:0046546","GO:0042692","GO:0043523","GO:0061333","GO:0060688","GO:0001823","GO:0014706","GO:0007548","GO:0072163","GO:0048608","GO:0072001","GO:0072088","GO:0008406","GO:0110110","GO:0072080","GO:0060560","GO:0061053","GO:0043009","GO:1905330","GO:0001763","GO:0014902","GO:0060485","GO:0070997","GO:0072078","GO:0090596","GO:1901215","GO:1901214","GO:0045137","GO:0060538","GO:0035…	["striated muscle cell differentiation","development of primary male sexual characteristics","muscle cell differentiation","regulation of neuron apoptotic process","renal tubule morphogenesis","regulation of morphogenesis of a branching structure","mesonephros development","striated muscle tissue development","sex differentiation","mesonephric epithelium development","reproductive structure devel…	query	0.3333333333333333	1.3736263736263736E-4	410.99864466879745	502.0	-3874.0
H__sapiens__1_-773523	H__sapiens__1_-773523	LAMC2	LAMC2	Q13753	ENSP00000432063	3918	NP_061486	NM_018891	nicein-100kDa	-0.1378176905211387	0.87125751577145	["GO:0062023","GO:0150115","GO:0007409","GO:0007044","GO:0097485"]	["collagen-containing extracellular matrix","cell-substrate junction organization","axonogenesis","cell-substrate junction assembly","neuron projection guidance"]	query	0.3333333333333333	1.5511090429657206E-4	2212.263433438141	1538.0	-3874.0
H__sapiens__1_-783055	H__sapiens__1_-783055	SV2A	SV2A	Q7L0J3	ENSP00000358142	9900	NP_055664	NM_014849	SV2	-0.15806368819844657	0.8537954035457744	["GO:0070382","GO:0098793","GO:0030133","GO:0030658"]	["exocytic vesicle","presynapse","transport vesicle","transport vesicle membrane"]	query	0.3333333333333333	1.6103059581320451E-4	4078.1917008515725	1674.0	-3874.0
H__sapiens__1_-781088	H__sapiens__1_-781088	XCL1	XCL1	P47992	ENSP00000356792	6375	NP_002986	NM_002995	SCYC1	-0.12165762412632279	0.8854514738336425	["GO:2000514","GO:1990266","GO:0002701","GO:0002825","GO:0051251","GO:0072676","GO:0051282","GO:0002699","GO:0070588","GO:0034612","GO:0035739","GO:0032945","GO:0070664","GO:0051209","GO:0051208","GO:0002687","GO:0051928","GO:0002702","GO:0022408","GO:2001185","GO:0002449","GO:0050868","GO:0046631","GO:0042092","GO:0002703","GO:0002891","GO:0030335","GO:0001914","GO:1901623","GO:1904427","GO:0071…	["regulation of CD4-positive, alpha-beta T cell activation","neutrophil migration","negative regulation of production of molecular mediator of immune response","regulation of T-helper 1 type immune response","positive regulation of lymphocyte activation","lymphocyte migration","regulation of sequestering of calcium ion","positive regulation of immune effector process","calcium ion transmembrane t…	query	0.3333333333333333	1.4903129657228018E-4	1742.1428752801291	1244.0	-3874.0
H__sapiens__1_-776171	H__sapiens__1_-776171	CXCL12	CXCL12	P48061	ENSP00000379141	6387	NP_954637	NM_199168	TPAR1	-0.15860004797817756	0.8533375848199443	["GO:0097193","GO:1990869","GO:2000401","GO:0061756","GO:0002691","GO:0030832","GO:0072676","GO:1902229","GO:0051271","GO:2001234","GO:0002548","GO:2001021","GO:0002687","GO:0051928","GO:0070509","GO:0071887","GO:0022408","GO:2001233","GO:0008630","GO:0040013","GO:0030335","GO:0110053","GO:0030595","GO:0043270","GO:0002685","GO:2001243","GO:1904994","GO:0050900","GO:0050920","GO:0009986","GO:0005…	["intrinsic apoptotic signaling pathway","cellular response to chemokine","regulation of lymphocyte migration","leukocyte adhesion to vascular endothelial cell","regulation of cellular extravasation","regulation of actin filament length","lymphocyte migration","regulation of intrinsic apoptotic signaling pathway in response to DNA damage","negative regulation of cellular component movement","nega…	query	0.3333333333333333	1.6409583196586806E-4	4628.1299292217245	2222.0	-3874.0
H__sapiens__1_-786397	H__sapiens__1_-786397	TLR1	TLR1	Q15399	ENSP00000424894	7096	NP_003254	NM_003263	rsc786	-0.15297298767441864	0.8581529022039072	["GO:0098857","GO:0098543","GO:0034134","GO:1903555","GO:0002221","GO:0071219","GO:0062208","GO:0034123","GO:0098581","GO:0002237","GO:0042277","GO:0032680","GO:0062207","GO:0009595","GO:0071216","GO:0098802","GO:0032635","GO:1903557","GO:0043235","GO:0071706","GO:0032675","GO:0034135","GO:0032637","GO:0032677","GO:0034121","GO:0002224","GO:0032640"]	["membrane microdomain","detection of other organism","toll-like receptor 2 signaling pathway","regulation of tumor necrosis factor superfamily cytokine production","pattern recognition receptor signaling pathway","cellular response to molecule of bacterial origin","positive regulation of pattern recognition receptor signaling pathway","positive regulation of toll-like receptor signaling pathway"…	query	0.3333333333333333	1.6041065126724414E-4	3316.497968224723	1602.0	-3874.0
H__sapiens__1_-774890	H__sapiens__1_-774890	BCL2L13	BCL2L13	Q9BXK5	ENSP00000480836	23786	NP_056182	NM_015367	MIL1	-0.12032472691754559	0.8866324765343758	["GO:0043281","GO:0043028","GO:0016504","GO:2000116","GO:0010950","GO:0045862","GO:0061134","GO:2001056","GO:0016505","GO:0052548","GO:0052547","GO:0043280","GO:0010952"]	["regulation of cysteine-type endopeptidase activity involved in apoptotic process","cysteine-type endopeptidase regulator activity involved in apoptotic process","peptidase activator activity","regulation of cysteine-type endopeptidase activity","positive regulation of endopeptidase activity","positive regulation of proteolysis","peptidase regulator activity","positive regulation of cysteine-typ…	query	0.3333333333333333	1.4903129657228018E-4	1525.7682412431077	1100.0	-3874.0
H__sapiens__1_-785677	H__sapiens__1_-785677	PLA2G1B	PLA2G1B	P04054	ENSP00000447233	5319	NP_000919	NM_000928	PPLA2	-0.13916497722911253	0.8700844724914789	["GO:0006631","GO:1990266","GO:0009306","GO:0006959","GO:0071715","GO:0043406","GO:0006658","GO:0006869","GO:0043405","GO:0010827","GO:0048144","GO:0043177","GO:0043065","GO:0033293","GO:0051222","GO:0042742","GO:0051928","GO:0046471","GO:0008654","GO:1904019","GO:0046474","GO:0072330","GO:0016298","GO:0071902","GO:0046394","GO:0016053","GO:0015718","GO:0006575","GO:0060191","GO:0032147","GO:0008…	["fatty acid metabolic process","neutrophil migration","protein secretion","humoral immune response","icosanoid transport","positive regulation of MAP kinase activity","phosphatidylserine metabolic process","lipid transport","regulation of MAP kinase activity","regulation of glucose transmembrane transport","fibroblast proliferation","organic acid binding","positive regulation of apoptotic proces…	query	0.3333333333333333	1.5360983102918587E-4	2781.8146409723886	1283.0	-3874.0
H__sapiens__1_-790440	H__sapiens__1_-790440	CSF2RA	CSF2RA	P15509	ENSP00000476684	1438	NP_758452	NM_172249	CSF2R	-0.11453140936492784	0.8917839276114076	["GO:0140375","GO:0009986"]	["immune receptor activity","cell surface"]	query	0.3333333333333333	1.5349194167306216E-4	1925.7455444004518	1329.0	-3874.0
H__sapiens__1_-774475	H__sapiens__1_-774475	GNAO1	GNAO1	P09471	ENSP00000502403	2775	NP_620073	NM_138736	G-ALPHA-o	-0.12806863519541822	0.8797929923083817	["GO:0071870","GO:0009898","GO:1905360","GO:0071868","GO:0019897","GO:0071867","GO:0071869","GO:0019898","GO:1903350","GO:0001664","GO:1903351","GO:0051427","GO:0098562","GO:0035567","GO:0031234","GO:0007187"]	["cellular response to catecholamine stimulus","cytoplasmic side of plasma membrane","GTPase complex","cellular response to monoamine stimulus","extrinsic component of plasma membrane","response to monoamine","response to catecholamine","extrinsic component of membrane","response to dopamine","G protein-coupled receptor binding","cellular response to dopamine","hormone receptor binding","cytoplas…	query	0.3333333333333333	1.5223017202009437E-4	2159.3937622270164	1495.0	-3874.0
H__sapiens__1_-779437	H__sapiens__1_-779437	ALOX5AP		P20292	ENSP00000479870	241	NP_001620	NM_001629	FLAP	-2.254548507161072	0.10492090408090055	["GO:0006631","GO:1901568","GO:0071248","GO:1901570","GO:0043177","GO:0010038","GO:0016765","GO:0005504","GO:0033293","GO:0006633","GO:0046456","GO:0071241","GO:0006690","GO:1901567","GO:0006636","GO:0016684","GO:0072330","GO:0046394","GO:0016053","GO:0006691","GO:0051592","GO:0016846","GO:0036041","GO:0031406","GO:0016209","GO:0004601","GO:0016829","GO:0033559"]	["fatty acid metabolic process","fatty acid derivative metabolic process","cellular response to metal ion","fatty acid derivative biosynthetic process","organic acid binding","response to metal ion","transferase activity, transferring alkyl or aryl (other than methyl) groups","fatty acid binding","monocarboxylic acid binding","fatty acid biosynthetic process","icosanoid biosynthetic process","cel…	result	0.3333333333333333	1.668335001668335E-4	4622.506218310339	2082.0	-3874.0
H__sapiens__1_-783172	H__sapiens__1_-783172	UBE2J2	UBE2J2	Q8N2K1	ENSP00000427244	118424	NP_919440	NM_194458	Ubc6p	-0.03829218113766143	0.9624316954182005	["GO:1903749","GO:0070585","GO:1903533","GO:1904951","GO:0034976","GO:0006839","GO:0044389","GO:0061650","GO:1903747","GO:0033157","GO:0072655","GO:0032388","GO:0090316","GO:0051222","GO:1903214","GO:0032386","GO:1903829","GO:0006626","GO:0043161","GO:0004842"]	["positive regulation of establishment of protein localization to mitochondrion","protein localization to mitochondrion","regulation of protein targeting","positive regulation of establishment of protein localization","response to endoplasmic reticulum stress","mitochondrial transport","ubiquitin-like protein ligase binding","ubiquitin-like protein conjugating enzyme activity","regulation of esta…	query	0.3333333333333333	1.374570446735395E-4	263.6047277592588	517.0	-3874.0
H__sapiens__1_-779062	H__sapiens__1_-779062	ADRM1	ADRM1	Q16186	ENSP00000480756	11047	NP_783163	NM_175573	Rpn13	-0.20405473031045596	0.815417741899851	["GO:0061134","GO:0032182","GO:0022624","GO:0061135","GO:0005838","GO:0000502","GO:0016504","GO:1905369","GO:1905368","GO:0070646"]	["peptidase regulator activity","ubiquitin-like protein binding","proteasome accessory complex","endopeptidase regulator activity","proteasome regulatory particle","proteasome complex","peptidase activator activity","endopeptidase complex","peptidase complex","protein modification by small protein removal"]	query	0.3333333333333333	1.576789656259855E-4	3295.292525731788	1514.0	-3874.0
H__sapiens__1_-786642	H__sapiens__1_-786642	CLTB	CLTB	P09497	ENSP00000427229	1212	NP_009028	NM_007097	Lcb	-0.12592482164904054	0.8816811276251896	["GO:0030276","GO:0070382","GO:0030665","GO:0030662","GO:0030135","GO:0098793","GO:0030133","GO:0006898","GO:0030658","GO:0030139","GO:0030136","GO:0098794"]	["clathrin binding","exocytic vesicle","clathrin-coated vesicle membrane","coated vesicle membrane","coated vesicle","presynapse","transport vesicle","receptor-mediated endocytosis","transport vesicle membrane","endocytic vesicle","clathrin-coated vesicle","postsynapse"]	query	0.3333333333333333	1.4492753623188405E-4	958.7950180058031	891.0	-3874.0
H__sapiens__1_-784524	H__sapiens__1_-784524	AVPR1A	AVPR1A	P37288	ENSP00000449822	552	NP_000697	NM_000706	AVPR1	-0.132939898086749	0.875517710817018	["GO:0060191","GO:0035296","GO:0010232","GO:1903522","GO:0003018","GO:0010518","GO:0001653","GO:0097756","GO:0003073","GO:0010863","GO:0008217","GO:0035150","GO:0060193","GO:0004930","GO:0010517","GO:0042310","GO:0019229","GO:0050886","GO:0001990","GO:1900274","GO:0019901","GO:0008528","GO:0003044","GO:0097746"]	["regulation of lipase activity","regulation of tube diameter","vascular transport","regulation of blood circulation","vascular process in circulatory system","positive regulation of phospholipase activity","peptide receptor activity","negative regulation of blood vessel diameter","regulation of systemic arterial blood pressure","positive regulation of phospholipase C activity","regulation of blo…	query	0.3333333333333333	1.5306903413439462E-4	1933.8375031260064	1537.0	-3874.0
H__sapiens__1_-779926	H__sapiens__1_-779926	EIF4E2	EIF4E2	O60573	ENSP00000390904	9470	NP_004837	NM_004846	IF4e	-0.13787009307657147	0.8712118608474114	["GO:2000637","GO:0060147","GO:0060148","GO:0060966","GO:0044389","GO:0060964"]	["positive regulation of gene silencing by miRNA","regulation of posttranscriptional gene silencing","positive regulation of posttranscriptional gene silencing","regulation of gene silencing by RNA","ubiquitin-like protein ligase binding","regulation of gene silencing by miRNA"]	query	0.3333333333333333	1.4723203769140164E-4	2838.7723473758124	1040.0	-3874.0
H__sapiens__1_-777450	H__sapiens__1_-777450	MPL	MPL	P40238	ENSP00000495154	4352	NP_005364	NM_005373	TPOR	-0.09714019197861183	0.907428782979113	["GO:0140375","GO:0004896"]	["immune receptor activity","cytokine receptor activity"]	query	0.3333333333333333	1.4570887367040654E-4	1002.0226915290793	981.0	-3874.0
H__sapiens__1_-780529	H__sapiens__1_-780529	SLCO1C1	SLCO1C1	Q9NYB5	ENSP00000444527	53919	NP_059131	NM_017435	SLC21A14	-0.129007499363818	0.8789673738247459	["GO:0010232","GO:1901618","GO:0003018","GO:0032350","GO:0015850","GO:0022804","GO:0006869","GO:0005319","GO:0015849","GO:0046942","GO:0018958","GO:0022853","GO:0042445","GO:0009914","GO:0008028","GO:0032352","GO:0015718","GO:0006575"]	["vascular transport","organic hydroxy compound transmembrane transporter activity","vascular process in circulatory system","regulation of hormone metabolic process","organic hydroxy compound transport","active transmembrane transporter activity","lipid transport","lipid transporter activity","organic acid transport","carboxylic acid transport","phenol-containing compound metabolic process","act…	query	0.3333333333333333	1.548467017652524E-4	2379.460252862106	1370.0	-3874.0
H__sapiens__1_-783736	H__sapiens__1_-783736	COL6A3	COL6A3	P12111	ENSP00000460277	1293	NP_476508	NM_057167		-0.17328715551514057	0.8408961122155938	["GO:0005581","GO:0005201"]	["collagen trimer","extracellular matrix structural constituent"]	query	0.3333333333333333	1.6126431220770844E-4	3395.184040628916	1794.0	-3874.0
H__sapiens__1_-776604	H__sapiens__1_-776604	ARPC3	ARPC3	O15145	ENSP00000446598	10094	NP_001274151	NM_001287222	p21-Arc	-0.18679643205869872	0.8296126017264469	["GO:0032273","GO:0006909","GO:0002431","GO:0030838","GO:0032535","GO:0030832","GO:0030041","GO:0031252","GO:0003779","GO:0038094","GO:0015629","GO:0002433","GO:0032271","GO:0008064","GO:0051258","GO:1902903","GO:0051495","GO:1902905","GO:0110053","GO:0032956","GO:0008154","GO:0030833","GO:0038093","GO:0090734","GO:0031334","GO:0045010"]	["positive regulation of protein polymerization","phagocytosis","Fc receptor mediated stimulatory signaling pathway","positive regulation of actin filament polymerization","regulation of cellular component size","regulation of actin filament length","actin filament polymerization","cell leading edge","actin binding","Fc-gamma receptor signaling pathway","actin cytoskeleton","immune response-regul…	query	0.3333333333333333	1.6191709844559586E-4	4000.615477722842	1729.0	-3874.0
H__sapiens__1_-778900	H__sapiens__1_-778900	EGLN3	EGLN3	Q9H6Z9	ENSP00000451316	112399	NP_071356	NM_022073	PHD3	-0.2425564692445571	0.7846194394607001	["GO:0043281","GO:0071453","GO:0043620","GO:0071456","GO:0043618","GO:0005506","GO:0036294","GO:2000116","GO:0010950","GO:0045862","GO:0001666","GO:2001056","GO:0070482","GO:0051402","GO:0052548","GO:0070997","GO:0036293","GO:0016705","GO:1901214","GO:0052547","GO:0043280","GO:0010952"]	["regulation of cysteine-type endopeptidase activity involved in apoptotic process","cellular response to oxygen levels","regulation of DNA-templated transcription in response to stress","cellular response to hypoxia","regulation of transcription from RNA polymerase II promoter in response to stress","iron ion binding","cellular response to decreased oxygen levels","regulation of cysteine-type en…	query	0.3333333333333333	1.7056114617090227E-4	6161.809176253527	2329.0	-3874.0
H__sapiens__1_-774089	H__sapiens__1_-774089	ACACB	ACACB	O00763	ENSP00000478488	32	NP_001084	NM_001093	HACC275	-0.12452182087583492	0.8829189950904213	["GO:1902653","GO:1902652","GO:0035383","GO:0006695","GO:1903825","GO:0008203","GO:0006869","GO:0006637","GO:0015849","GO:0033865","GO:0106118","GO:0006066","GO:1905039","GO:0033875","GO:0016126","GO:0016874","GO:0006694","GO:0050810","GO:1990542","GO:0019218","GO:1902930","GO:0019216","GO:0015718","GO:1902001","GO:1901617","GO:0046890","GO:0006839","GO:0046165","GO:0046942","GO:0008202","GO:0019…	["secondary alcohol biosynthetic process","secondary alcohol metabolic process","thioester metabolic process","cholesterol biosynthetic process","organic acid transmembrane transport","cholesterol metabolic process","lipid transport","acyl-CoA metabolic process","organic acid transport","nucleoside bisphosphate metabolic process","regulation of sterol biosynthetic process","alcohol metabolic proc…	query	0.3333333333333333	1.5186028853454822E-4	2225.3410798116106	1316.0	-3874.0
H__sapiens__1_-776201	H__sapiens__1_-776201	FGF8	FGF8	P55075	ENSP00000484420	2253	NP_149355	NM_033165	AIGF	-0.15407894782162154	0.8572043439243759	["GO:0048568","GO:0001822","GO:0003205","GO:0002065","GO:0060173","GO:0001501","GO:0014706","GO:0003272","GO:0007548","GO:0003206","GO:0048608","GO:0044344","GO:0043491","GO:0072001","GO:0003279","GO:0070851","GO:0003197","GO:0003002","GO:0003203","GO:0060411","GO:0001837","GO:0003151","GO:0007507","GO:0060317","GO:0007517","GO:0003007","GO:0007389","GO:0048598","GO:0060485","GO:0048738","GO:0071…	["embryonic organ development","kidney development","cardiac chamber development","columnar/cuboidal epithelial cell differentiation","limb development","skeletal system development","striated muscle tissue development","endocardial cushion formation","sex differentiation","cardiac chamber morphogenesis","reproductive structure development","cellular response to fibroblast growth factor stimulus"…	query	0.3333333333333333	1.5862944162436547E-4	3397.8939363294294	1623.0	-3874.0
H__sapiens__1_-788506	H__sapiens__1_-788506	NEU1	NEU1	Q99519	ENSP00000436889	4758	NP_000425	NM_000434		-0.184680442546635	0.8313699118599986	["GO:0044242","GO:0006643","GO:0046479","GO:0009311","GO:0042581","GO:0030149","GO:0016042","GO:0019377","GO:0016798","GO:0034774","GO:0046466","GO:0046514","GO:0016052","GO:1901136","GO:0006665","GO:0005775","GO:0004553"]	["cellular lipid catabolic process","membrane lipid metabolic process","glycosphingolipid catabolic process","oligosaccharide metabolic process","specific granule","sphingolipid catabolic process","lipid catabolic process","glycolipid catabolic process","hydrolase activity, acting on glycosyl bonds","secretory granule lumen","membrane lipid catabolic process","ceramide catabolic process","carbohy…	query	0.3333333333333333	1.6501650165016502E-4	4516.337244300118	1850.0	-3874.0
H__sapiens__1_-786039	H__sapiens__1_-786039	IL16	IL16	Q14005	ENSP00000456972	3603	NP_757366	NM_172217	prIL-16	-0.14297765114864877	0.8667734400697937	["GO:0050927","GO:0010959","GO:0050926","GO:0050900","GO:0050920","GO:0032612","GO:0060326","GO:0032635","GO:0032652","GO:0006816","GO:0032655","GO:0032732","GO:0032615","GO:0050918","GO:0050921","GO:0031349","GO:0032675","GO:0050727"]	["positive regulation of positive chemotaxis","regulation of metal ion transport","regulation of positive chemotaxis","leukocyte migration","regulation of chemotaxis","interleukin-1 production","cell chemotaxis","interleukin-6 production","regulation of interleukin-1 production","calcium ion transport","regulation of interleukin-12 production","positive regulation of interleukin-1 production","in…	query	0.3333333333333333	1.5328019619865113E-4	2177.291810811479	1424.0	-3874.0
H__sapiens__1_-772767	H__sapiens__1_-772767	WNT16	WNT16	Q9UBV4	ENSP00000355065	51384	NP_476509	NM_057168		-0.11158128951039245	0.894418681591323	["GO:0048568","GO:0031098","GO:0062197","GO:0007569","GO:0046328","GO:0090398","GO:0001654","GO:0050673","GO:0070302","GO:0014066","GO:0048017","GO:0007423","GO:0032872","GO:0048562","GO:0043010","GO:0007568","GO:0006979","GO:0034599","GO:0048015","GO:0150063","GO:0070304","GO:0048880","GO:0001664","GO:0048598","GO:0048592","GO:0007254","GO:0090596","GO:0051403","GO:0014065","GO:0032874","GO:0016…	["embryonic organ development","stress-activated protein kinase signaling cascade","cellular response to chemical stress","cell aging","regulation of JNK cascade","cellular senescence","eye development","epithelial cell proliferation","regulation of stress-activated protein kinase signaling cascade","regulation of phosphatidylinositol 3-kinase signaling","inositol lipid-mediated signaling","senso…	query	0.3333333333333333	1.5165301789505612E-4	2197.5496752548092	1257.0	-3874.0
H__sapiens__1_-777991	H__sapiens__1_-777991	PLG	PLG	P00747	ENSP00000389424	5340	NP_001161810	NM_001168338		-0.1474955723603471	0.8628662587737801	["GO:1903036","GO:0050818","GO:0051917","GO:0031091","GO:0019898","GO:1903034","GO:1900046","GO:0090303","GO:0008236","GO:0034774","GO:0044331","GO:0022408","GO:0042730","GO:0007596","GO:0009897","GO:1900047","GO:0050817","GO:0007162","GO:2000047","GO:0030193","GO:1903035","GO:0019897","GO:0003823","GO:0009986","GO:0030194","GO:0030195","GO:0050820","GO:0030198","GO:0061041","GO:0031589","GO:0050…	["positive regulation of response to wounding","regulation of coagulation","regulation of fibrinolysis","platelet alpha granule","extrinsic component of membrane","regulation of response to wounding","regulation of hemostasis","positive regulation of wound healing","serine-type peptidase activity","secretory granule lumen","cell-cell adhesion mediated by cadherin","negative regulation of cell-cel…	query	0.3333333333333333	1.5375153751537516E-4	2277.1075934855025	1553.0	-3874.0
H__sapiens__1_-788687	H__sapiens__1_-788687	RAB11B	RAB11B	Q15907	ENSP00000473042	9230	NP_004209	NM_004218	H-YPT3	-0.14732778751148062	0.8630110468048797	["GO:0009306","GO:0042593","GO:0034394","GO:0032549","GO:0009746","GO:0006826","GO:0030139","GO:0070382","GO:0098793","GO:0045056","GO:0032550","GO:0009914","GO:0009743","GO:0104004","GO:0032561","GO:0001882","GO:0030073","GO:0055037","GO:0051648","GO:0001883","GO:0071331","GO:0016197","GO:0030072","GO:0051650","GO:0097242","GO:0043112","GO:0009749","GO:0000041","GO:0030133","GO:0001678","GO:0017…	["protein secretion","glucose homeostasis","protein localization to cell surface","ribonucleoside binding","response to hexose","iron ion transport","endocytic vesicle","exocytic vesicle","presynapse","transcytosis","purine ribonucleoside binding","hormone transport","response to carbohydrate","cellular response to environmental stimulus","guanyl ribonucleotide binding","nucleoside binding","insu…	query	0.3333333333333333	1.467782181124321E-4	1315.0220187914197	1020.0	-3874.0
H__sapiens__1_-782577	H__sapiens__1_-782577	ACSS1	ACSS1	Q9NUB1	ENSP00000439304	84532	NP_115890	NM_032501	MGC33843	-0.04988362553964614	0.9513401297531701	["GO:0035383","GO:0071616","GO:0009260","GO:0006637","GO:0033865","GO:0016878","GO:0006066","GO:0033875","GO:0016874","GO:0016405","GO:0034033","GO:0006164","GO:0034308","GO:0009165","GO:0035384","GO:0044272","GO:0016877","GO:0072522","GO:0046390","GO:0009152","GO:1901293","GO:0006067","GO:0006084","GO:0034032","GO:0033866","GO:0034030"]	["thioester metabolic process","acyl-CoA biosynthetic process","ribonucleotide biosynthetic process","acyl-CoA metabolic process","nucleoside bisphosphate metabolic process","acid-thiol ligase activity","alcohol metabolic process","ribonucleoside bisphosphate metabolic process","ligase activity","CoA-ligase activity","purine nucleoside bisphosphate biosynthetic process","purine nucleotide biosynt…	query	0.3333333333333333	1.4025245441795232E-4	535.9827213077889	659.0	-3874.0
H__sapiens__1_-783732	H__sapiens__1_-783732	HIPK1	HIPK1	Q86Z02	ENSP00000486090	204851	NP_938010	NM_198269	Nbak2	-0.13186537797068845	0.8764589778238598	["GO:1901342","GO:0097193","GO:0008630","GO:0071356","GO:0018209","GO:1904018","GO:0045765","GO:0060759","GO:0001959","GO:0072331","GO:0034612","GO:0033209","GO:0150063","GO:0048880","GO:0072332","GO:0001525","GO:1904019","GO:0007423","GO:0018210"]	["regulation of vasculature development","intrinsic apoptotic signaling pathway","intrinsic apoptotic signaling pathway in response to DNA damage","cellular response to tumor necrosis factor","peptidyl-serine modification","positive regulation of vasculature development","regulation of angiogenesis","regulation of response to cytokine stimulus","regulation of cytokine-mediated signaling pathway",…	query	0.3333333333333333	1.537042729787888E-4	2419.205743261883	1481.0	-3874.0
H__sapiens__1_-787752	H__sapiens__1_-787752	F2R	F2R	P25116	ENSP00000426398	2149	NP_001983	NM_001992	CF2R	-0.1693166035744425	0.8442415711699744	["GO:0035296","GO:0043281","GO:0009306","GO:0097696","GO:0045216","GO:1903522","GO:0051282","GO:0070588","GO:0051048","GO:0051209","GO:0051208","GO:0051928","GO:0003071","GO:0048017","GO:0007596","GO:0007266","GO:0008528","GO:0043122","GO:0050817","GO:0007265","GO:0010714","GO:0003018","GO:1904427","GO:0090257","GO:0046425","GO:0044853","GO:0048015","GO:0006937","GO:0006816","GO:0048872","GO:0051…	["regulation of tube diameter","regulation of cysteine-type endopeptidase activity involved in apoptotic process","protein secretion","receptor signaling pathway via STAT","cell-cell junction organization","regulation of blood circulation","regulation of sequestering of calcium ion","calcium ion transmembrane transport","negative regulation of secretion","release of sequestered calcium ion into c…	query	0.3333333333333333	1.5765410688948448E-4	3109.7105370575846	1683.0	-3874.0
H__sapiens__1_-781223	H__sapiens__1_-781223	PSEN2	PSEN2	P49810	ENSP00000486498	5664	NP_036618	NM_012486	STM2	-0.15200878813304444	0.858980731870999	["GO:0022406","GO:1903169","GO:0098857","GO:0051604","GO:1904062","GO:0070588","GO:0007219","GO:0031965","GO:0070509","GO:0051924","GO:0030425","GO:1990542","GO:0045177","GO:0033619","GO:0030424","GO:0060401","GO:0042982","GO:0010959","GO:0006839","GO:0043292","GO:0030016","GO:0006816","GO:0031674","GO:0034765","GO:0044297","GO:0090279","GO:0030017"]	["membrane docking","regulation of calcium ion transmembrane transport","membrane microdomain","protein maturation","regulation of cation transmembrane transport","calcium ion transmembrane transport","Notch signaling pathway","nuclear membrane","calcium ion import","regulation of calcium ion transport","dendrite","mitochondrial transmembrane transport","apical part of cell","membrane protein pro…	query	0.3333333333333333	1.529051987767584E-4	2045.1039803526112	1385.0	-3874.0
H__sapiens__1_-773597	H__sapiens__1_-773597	CA11	CA11	O75493	ENSP00000469234	770	NP_001208	NM_001217	CARPX1	-0.19020687687414942	0.826788072917578	["GO:0016829","GO:0016835","GO:0016836"]	["lyase activity","carbon-oxygen lyase activity","hydro-lyase activity"]	query	0.3333333333333333	1.6121231662098983E-4	3776.3787324794107	1602.0	-3874.0
H__sapiens__1_-784182	H__sapiens__1_-784182	ADCY1	ADCY1	Q08828	ENSP00000479770	107	NP_066939	NM_021116	DFNB44	-0.10540616051783029	0.8999589205635361	["GO:0051091","GO:0071248","GO:0097306","GO:0007623","GO:0009260","GO:0007188","GO:0010038","GO:1900271","GO:0016849","GO:0009975","GO:0043434","GO:0071241","GO:0033762","GO:0007187","GO:0006164","GO:0046058","GO:0030104","GO:0009187","GO:0052652","GO:0032147","GO:0051592","GO:0009190","GO:0060291","GO:0009165","GO:0003014","GO:1901653","GO:0048511","GO:0072522","GO:0019933","GO:0071375","GO:0046…	["positive regulation of DNA-binding transcription factor activity","cellular response to metal ion","cellular response to alcohol","circadian rhythm","ribonucleotide biosynthetic process","adenylate cyclase-modulating G protein-coupled receptor signaling pathway","response to metal ion","regulation of long-term synaptic potentiation","phosphorus-oxygen lyase activity","cyclase activity","respons…	query	0.3333333333333333	1.4943215780035862E-4	1488.052409337753	1240.0	-3874.0
H__sapiens__1_-784848	H__sapiens__1_-784848	RAB8A	RAB8A	P61006	ENSP00000467501	4218	NP_005361	NM_005370	RAB8	-0.1715676668372136	0.8423432673867675	["GO:0022406","GO:0032549","GO:0044309","GO:1902414","GO:0005802","GO:0048284","GO:0030139","GO:0140029","GO:0043434","GO:1990778","GO:0070382","GO:1903539","GO:0097120","GO:0030135","GO:0098793","GO:0032550","GO:0030425","GO:0016050","GO:0032561","GO:0001882","GO:0030136","GO:0055037","GO:0001883","GO:1901653","GO:0006906","GO:0030133","GO:0017022","GO:0005798","GO:0048278","GO:0071375","GO:0098…	["membrane docking","ribonucleoside binding","neuron spine","protein localization to cell junction","trans-Golgi network","organelle fusion","endocytic vesicle","exocytic process","response to peptide hormone","protein localization to cell periphery","exocytic vesicle","protein localization to postsynaptic membrane","receptor localization to synapse","coated vesicle","presynapse","purine ribonucl…	query	0.3333333333333333	1.621796951021732E-4	3811.992684517427	1749.0	-3874.0
H__sapiens__1_-786449	H__sapiens__1_-786449	ATP2A2	ATP2A2	P16615	ENSP00000450407	488	NP_733765	NM_170665	SERCA2	-0.13573610498720717	0.8730730017016923	["GO:0006942","GO:1903522","GO:0006941","GO:0015399","GO:0070588","GO:0086003","GO:0060048","GO:0072509","GO:0001508","GO:0070509","GO:0019722","GO:0016528","GO:0019829","GO:0045823","GO:0090257","GO:0035637","GO:0016529","GO:0086001","GO:0060047","GO:0006937","GO:0006816","GO:1900120","GO:0003015","GO:0022853","GO:0070296","GO:0008016","GO:0022804","GO:0006936","GO:0032091","GO:0098901","GO:0042…	["regulation of striated muscle contraction","regulation of blood circulation","striated muscle contraction","primary active transmembrane transporter activity","calcium ion transmembrane transport","cardiac muscle cell contraction","cardiac muscle contraction","divalent inorganic cation transmembrane transporter activity","action potential","calcium ion import","calcium-mediated signaling","sarc…	query	0.3333333333333333	1.5202189115232594E-4	1994.4251565707816	1424.0	-3874.0
H__sapiens__1_-783021	H__sapiens__1_-783021	EDA	EDA	Q92838	ENSP00000481963	1896	NP_001390	NM_001399	XLHED	-0.1036552220448793	0.9015360736076632	["GO:0051091","GO:0071356","GO:0032813","GO:0038061","GO:0005126","GO:1901222","GO:0042476","GO:0034612"]	["positive regulation of DNA-binding transcription factor activity","cellular response to tumor necrosis factor","tumor necrosis factor receptor superfamily binding","NIK/NF-kappaB signaling","cytokine receptor binding","regulation of NIK/NF-kappaB signaling","odontogenesis","response to tumor necrosis factor"]	query	0.3333333333333333	1.457938474996355E-4	1043.9512751758216	1011.0	-3874.0
H__sapiens__1_-783271	H__sapiens__1_-783271	NLRX1	NLRX1	Q86UT6	ENSP00000433442	79671	NP_078894	NM_024618	NOD9	-0.11668403081931307	0.8898663190792702	["GO:0019867","GO:0031968","GO:0032479","GO:0032606","GO:0007249","GO:0001818","GO:0043122"]	["outer membrane","organelle outer membrane","regulation of type I interferon production","type I interferon production","I-kappaB kinase/NF-kappaB signaling","negative regulation of cytokine production","regulation of I-kappaB kinase/NF-kappaB signaling"]	query	0.3333333333333333	1.4947683109118088E-4	1438.3701796888329	1098.0	-3874.0
H__sapiens__1_-775184	H__sapiens__1_-775184	STK4	STK4	Q13043	ENSP00000482076	6789	NP_006273	NM_006282	YSK3	-0.15471907339580654	0.8566558010884073	["GO:0018209","GO:0019209","GO:0031647","GO:0019887","GO:0019207","GO:0030295","GO:0051099","GO:0033135","GO:0043393","GO:0060070","GO:0060828","GO:0051098","GO:0018105","GO:0030178"]	["peptidyl-serine modification","kinase activator activity","regulation of protein stability","protein kinase regulator activity","kinase regulator activity","protein kinase activator activity","positive regulation of binding","regulation of peptidyl-serine phosphorylation","regulation of protein binding","canonical Wnt signaling pathway","regulation of canonical Wnt signaling pathway","regulatio…	query	0.3333333333333333	1.5137753557372085E-4	2144.472752668328	1367.0	-3874.0
H__sapiens__1_-778596	H__sapiens__1_-778596	ELK1	ELK1	P19419	ENSP00000366182	2002	NP_005220	NM_005229		-0.1288479276518032	0.8791076433446183			query	0.3333333333333333	1.4725371815638345E-4	1464.5730450246574	1078.0	-3874.0
H__sapiens__1_-780910	H__sapiens__1_-780910	TNFRSF11A	TNFRSF11A	Q9Y6Q6	ENSP00000492422	8792	NP_003830	NM_003839	RANK	-0.1455103358860743	0.8645809538175309	["GO:0001659","GO:0002673","GO:0046850","GO:0071715","GO:0043406","GO:0030099","GO:0006869","GO:0043405","GO:0007623","GO:0032370","GO:0034612","GO:1905952","GO:1903793","GO:0043506","GO:0071902","GO:0050727","GO:0015718","GO:0071356","GO:0032303","GO:0030595","GO:0032309","GO:0043270","GO:0044070","GO:0050900","GO:0009986","GO:0140353","GO:0048511","GO:0046942","GO:1901571","GO:0001894","GO:0002…	["temperature homeostasis","regulation of acute inflammatory response","regulation of bone remodeling","icosanoid transport","positive regulation of MAP kinase activity","myeloid cell differentiation","lipid transport","regulation of MAP kinase activity","circadian rhythm","positive regulation of lipid transport","response to tumor necrosis factor","regulation of lipid localization","positive reg…	query	0.3333333333333333	1.5787811809283233E-4	2711.506796869061	1553.0	-3874.0
H__sapiens__1_-782125	H__sapiens__1_-782125	IPMK	IPMK	Q8NFU5	ENSP00000363046	253430	NP_689416	NM_152230		-0.05011414496153669	0.9511208526512245	["GO:0043647","GO:1901617","GO:0019751","GO:0046173","GO:0097300","GO:0070265","GO:0046165","GO:0035004","GO:0006066"]	["inositol phosphate metabolic process","organic hydroxy compound biosynthetic process","polyol metabolic process","polyol biosynthetic process","programmed necrotic cell death","necrotic cell death","alcohol biosynthetic process","phosphatidylinositol 3-kinase activity","alcohol metabolic process"]	query	0.3333333333333333	1.448225923244026E-4	1208.1504611825308	946.0	-3874.0
H__sapiens__1_-772864	H__sapiens__1_-772864	CACNG3	CACNG3	O60359	ENSP00000005284	10368	NP_006530	NM_006539		-0.1791133507527137	0.8360111315350962	["GO:0005244","GO:0045211","GO:1903522","GO:0032279","GO:0005262","GO:0072509","GO:0032412","GO:1990778","GO:0022832","GO:0010469","GO:0098984","GO:1903539","GO:0022843","GO:0072665","GO:0051966","GO:0031623","GO:0043112","GO:0007041","GO:0035637","GO:0061462","GO:0060047","GO:0098802","GO:0098657","GO:0098794","GO:0022898","GO:0072666","GO:0099601","GO:0034704","GO:0003015","GO:0050804","GO:0043…	["voltage-gated ion channel activity","postsynaptic membrane","regulation of blood circulation","asymmetric synapse","calcium channel activity","divalent inorganic cation transmembrane transporter activity","regulation of ion transmembrane transporter activity","protein localization to cell periphery","voltage-gated channel activity","regulation of signaling receptor activity","neuron to neuron s…	query	0.3333333333333333	1.701258931609391E-4	6483.041461164393	2174.0	-3874.0
H__sapiens__1_-781240	H__sapiens__1_-781240	ATP6V1C2	ATP6V1C2	Q8NEY4	ENSP00000497038	245973	NP_653184	NM_144583	ATP6C2	-0.03565266285868383	0.9649754070803902	["GO:0030641","GO:0055067","GO:0045851","GO:0022804","GO:0015399","GO:0030004","GO:0051453","GO:0006826","GO:0042626","GO:0043434","GO:0006885","GO:0015078","GO:0019829","GO:0051452","GO:1901653","GO:0016469","GO:0000041","GO:0033176","GO:0009678","GO:0032869","GO:0071375","GO:0032868","GO:0090382","GO:0022853","GO:0010506","GO:0042625","GO:0016236","GO:0044769"]	["regulation of cellular pH","monovalent inorganic cation homeostasis","pH reduction","active transmembrane transporter activity","primary active transmembrane transporter activity","cellular monovalent inorganic cation homeostasis","regulation of intracellular pH","iron ion transport","ATPase-coupled transmembrane transporter activity","response to peptide hormone","regulation of pH","proton tra…	query	0.3333333333333333	1.3904338153503893E-4	476.63229442741095	583.0	-3874.0
H__sapiens__1_-778389	H__sapiens__1_-778389	GRK4	GRK4	P32298	ENSP00000427445	2868	NP_892027	NM_182982	GPRK4	-0.13488159653156165	0.8738193688071281	["GO:0071478","GO:0043112","GO:0009416","GO:0071482","GO:0071214","GO:0008277","GO:0006898","GO:0104004"]	["cellular response to radiation","receptor metabolic process","response to light stimulus","cellular response to light stimulus","cellular response to abiotic stimulus","regulation of G protein-coupled receptor signaling pathway","receptor-mediated endocytosis","cellular response to environmental stimulus"]	query	0.3333333333333333	1.4812620352540364E-4	1501.501598533555	1105.0	-3874.0
H__sapiens__1_-775451	H__sapiens__1_-775451	CLN5	CLN5	O75503	ENSP00000490937	1203	NP_006484	NM_006493		-0.14818428822954138	0.8622721936828799	["GO:0030641","GO:0055067","GO:0045851","GO:0016197","GO:0071695","GO:0051452","GO:0051604","GO:0030004","GO:0051099","GO:0051453","GO:0021700","GO:0016485","GO:0048029","GO:0030246","GO:0006885","GO:0080171","GO:0007033","GO:0007040","GO:0051098"]	["regulation of cellular pH","monovalent inorganic cation homeostasis","pH reduction","endosomal transport","anatomical structure maturation","intracellular pH reduction","protein maturation","cellular monovalent inorganic cation homeostasis","positive regulation of binding","regulation of intracellular pH","developmental maturation","protein processing","monosaccharide binding","carbohydrate bin…	query	0.3333333333333333	1.4714537963507945E-4	1348.9439557092185	1072.0	-3874.0
H__sapiens__1_-774910	H__sapiens__1_-774910	GGT1	GGT1	P19440	ENSP00000417044	2678	NP_038347	NM_013430	D22S732	-0.07401149197664361	0.9286610216291945	["GO:1901568","GO:1901570","GO:0044272","GO:0051604","GO:0044273","GO:0009410","GO:0043648","GO:0016746","GO:0016485","GO:0046456","GO:0006690","GO:0006520","GO:0002237","GO:0071466","GO:0046394","GO:0016053","GO:0006691","GO:0009064","GO:0006575"]	["fatty acid derivative metabolic process","fatty acid derivative biosynthetic process","sulfur compound biosynthetic process","protein maturation","sulfur compound catabolic process","response to xenobiotic stimulus","dicarboxylic acid metabolic process","transferase activity, transferring acyl groups","protein processing","icosanoid biosynthetic process","icosanoid metabolic process","cellular …	query	0.3333333333333333	1.5135462388375965E-4	2159.056811920715	1165.0	-3874.0
H__sapiens__1_-790515	H__sapiens__1_-790515	HLA-DRB5	HLA-DRB5	Q30154	ENSP00000364114	3127	NP_002116	NM_002125		-0.04836780198380003	0.9527832870410464	["GO:0030176","GO:0030662","GO:0019882","GO:0005770","GO:0005802","GO:0034341","GO:0042611","GO:0030139","GO:0030666","GO:0030135","GO:0002495","GO:0098553","GO:0030136","GO:0098576","GO:0042277","GO:0030665","GO:0003823","GO:0030134","GO:0030133","GO:0005798","GO:0030658","GO:0048002","GO:0071346","GO:0010008","GO:0005789","GO:0031227","GO:0050851","GO:0019884","GO:0045334","GO:0002504","GO:0030…	["integral component of endoplasmic reticulum membrane","coated vesicle membrane","antigen processing and presentation","late endosome","trans-Golgi network","response to interferon-gamma","MHC protein complex","endocytic vesicle","endocytic vesicle membrane","coated vesicle","antigen processing and presentation of peptide antigen via MHC class II","lumenal side of endoplasmic reticulum membrane"…	query	0.3333333333333333	1.3622122326658494E-4	216.15580675792094	520.0	-3874.0
H__sapiens__1_-788783	H__sapiens__1_-788783	SHC4	SHC4	Q6S5L8	ENSP00000453397	399694	NP_976224	NM_203349	SHCD	-0.04572403158476707	0.9553055599781602	["GO:0019901","GO:1990782"]	["protein kinase binding","protein tyrosine kinase binding"]	query	0.3333333333333333	1.4667057788207686E-4	1323.0792067413324	1070.0	-3874.0
H__sapiens__1_-782652	H__sapiens__1_-782652	FZD7	FZD7	O75084	ENSP00000286201	8324	NP_003498	NM_003507	FzE3	-0.1532420487611008	0.8579220377112191	["GO:0055007","GO:0051146","GO:0042692","GO:1905207","GO:0050678","GO:2000725","GO:0035051","GO:0014706","GO:0051154","GO:0050679","GO:0098727","GO:0001708","GO:0055037","GO:0001736","GO:0007507","GO:0051153","GO:1901981","GO:0070304","GO:0010008","GO:1902936","GO:0060795","GO:0060070","GO:0007254","GO:0090175","GO:0035567","GO:0007369","GO:0010810","GO:0031098","GO:0051148","GO:0001704","GO:0046…	["cardiac muscle cell differentiation","striated muscle cell differentiation","muscle cell differentiation","regulation of cardiocyte differentiation","regulation of epithelial cell proliferation","regulation of cardiac muscle cell differentiation","cardiocyte differentiation","striated muscle tissue development","negative regulation of striated muscle cell differentiation","positive regulation o…	query	0.3333333333333333	1.6136840406648378E-4	3598.1701112566975	1761.0	-3874.0
H__sapiens__1_-788623	H__sapiens__1_-788623	DGAT1	DGAT1	O75907	ENSP00000495489	8694	NP_036211	NM_012079	DGAT	-0.17403187719635713	0.8402701117761582	["GO:1901568","GO:0035383","GO:0046460","GO:0008374","GO:0042581","GO:0006637","GO:0034377","GO:0033865","GO:0006638","GO:0016411","GO:0033875","GO:0046463","GO:0006641","GO:0097006","GO:0006639","GO:0071827","GO:0071825","GO:0065005","GO:0045017","GO:0016747","GO:0046462","GO:0016746","GO:0051235","GO:0035337","GO:0030667","GO:0034032"]	["fatty acid derivative metabolic process","thioester metabolic process","neutral lipid biosynthetic process","O-acyltransferase activity","specific granule","acyl-CoA metabolic process","plasma lipoprotein particle assembly","nucleoside bisphosphate metabolic process","neutral lipid metabolic process","acylglycerol O-acyltransferase activity","ribonucleoside bisphosphate metabolic process","acyl…	query	0.3333333333333333	1.584786053882726E-4	3394.848386204994	1478.0	-3874.0
H__sapiens__1_-778187	H__sapiens__1_-778187	INHA	INHA	P05111	ENSP00000243786	3623	NP_002182	NM_002191		-0.15297634989699116	0.8581500169076992	["GO:0042113","GO:0030099","GO:0050869","GO:0051048","GO:0007548","GO:0048608","GO:0045620","GO:0008406","GO:0002761","GO:0050886","GO:0009914","GO:1903707","GO:0046888","GO:0060986","GO:0002762","GO:0046887","GO:0045619","GO:0046660","GO:0090100","GO:1902105","GO:0030183","GO:0007178","GO:0048872","GO:0060393","GO:0051250","GO:0002573","GO:0045638","GO:0045137","GO:1903706","GO:0046879","GO:0051…	["B cell activation","myeloid cell differentiation","negative regulation of B cell activation","negative regulation of secretion","sex differentiation","reproductive structure development","negative regulation of lymphocyte differentiation","gonad development","regulation of myeloid leukocyte differentiation","endocrine process","hormone transport","negative regulation of hemopoiesis","negative r…	query	0.3333333333333333	1.6194331983805668E-4	3771.7293869549776	1761.0	-3874.0
H__sapiens__1_-776921	H__sapiens__1_-776921	DROSHA	DROSHA	Q9NRR4	ENSP00000430921	29102	NP_037367	NM_013235	RNASEN	-0.21221104065997407	0.8087939911364621	["GO:0031050","GO:0042742","GO:0046332","GO:0035196","GO:0070918"]	["dsRNA processing","defense response to bacterium","SMAD binding","production of miRNAs involved in gene silencing by miRNA","production of small RNA involved in gene silencing by RNA"]	query	0.3333333333333333	1.576789656259855E-4	3854.633480642996	1575.0	-3874.0
H__sapiens__1_-780518	H__sapiens__1_-780518	ETV6	ETV6	P41212	ENSP00000441463	2120	NP_001978	NM_001987	TEL	-0.15067046520387525	0.860131095087209	["GO:0072089"]	["stem cell proliferation"]	query	0.3333333333333333	1.6191709844559586E-4	3686.062061135549	1886.0	-3874.0
H__sapiens__1_-775930	H__sapiens__1_-775930	SIPA1L3	SIPA1L3	O60292	ENSP00000472734	23094	NP_055888	NM_015073	SPAR3	-0.10978067010689528	0.896030640050558	["GO:0150063","GO:0048880","GO:0030010","GO:0007163","GO:0015629","GO:0002064","GO:0070160","GO:0005911","GO:0043087","GO:0007423"]	["visual system development","sensory system development","establishment of cell polarity","establishment or maintenance of cell polarity","actin cytoskeleton","epithelial cell development","tight junction","cell-cell junction","regulation of GTPase activity","sensory organ development"]	query	0.3333333333333333	1.441753171856978E-4	889.9816556368422	835.0	-3874.0
H__sapiens__1_-781981	H__sapiens__1_-781981	EI24	EI24	O14681	ENSP00000484510	9538	NP_004870	NM_004879	TP53I8	-0.14997517111783493	0.860729347107287	["GO:0045926","GO:0001558"]	["negative regulation of growth","regulation of cell growth"]	query	0.3333333333333333	1.4806040864672785E-4	1608.4366916482309	1041.0	-3874.0
H__sapiens__1_-777064	H__sapiens__1_-777064	CISH	CISH	Q9NSE2	ENSP00000409346	1154	NP_659508	NM_145071	SOCS	-0.1360232041127571	0.8728223791848367	["GO:0019898","GO:0061695","GO:0030258","GO:0035014","GO:0098761","GO:0019207","GO:0046488","GO:0098760","GO:0046834"]	["extrinsic component of membrane","transferase complex, transferring phosphorus-containing groups","lipid modification","phosphatidylinositol 3-kinase regulator activity","cellular response to interleukin-7","kinase regulator activity","phosphatidylinositol metabolic process","response to interleukin-7","lipid phosphorylation"]	query	0.3333333333333333	1.596169193934557E-4	3154.1690997008905	1619.0	-3874.0
H__sapiens__1_-775799	H__sapiens__1_-775799	AKT2	AKT2	P31751	ENSP00000500412	208	NP_001617	NM_001626	PKBÎ²	-0.14127761980263093	0.8682482353317023	["GO:0006631","GO:1903825","GO:0005979","GO:0032885","GO:0010827","GO:1905952","GO:0030258","GO:0061180","GO:0034766","GO:0000271","GO:0050994","GO:0006109","GO:0005996","GO:0032369","GO:0008643","GO:0031998","GO:1903959","GO:1904659","GO:0019318","GO:0033157","GO:0043255","GO:0044070","GO:0008645","GO:0016051","GO:0071375","GO:0046942","GO:0009250","GO:0015908","GO:0010828","GO:0016054","GO:0044…	["fatty acid metabolic process","organic acid transmembrane transport","regulation of glycogen biosynthetic process","regulation of polysaccharide biosynthetic process","regulation of glucose transmembrane transport","regulation of lipid localization","lipid modification","mammary gland epithelium development","negative regulation of ion transmembrane transport","polysaccharide biosynthetic proce…	query	0.3333333333333333	1.514921981517952E-4	2217.3783035877473	1384.0	-3874.0
H__sapiens__1_-784021	H__sapiens__1_-784021	HHIP	HHIP	Q96QV1	ENSP00000408587	64399	NP_071920	NM_022475	FLJ20992	-0.05053037965400729	0.9507250455356598	["GO:0008589","GO:0007224","GO:0031253","GO:0001501"]	["regulation of smoothened signaling pathway","smoothened signaling pathway","cell projection membrane","skeletal system development"]	query	0.3333333333333333	1.4894250819183795E-4	1642.8741432405739	1197.0	-3874.0
H__sapiens__1_-779291	H__sapiens__1_-779291	PPARG	PPARG	P37231	ENSP00000499004	5468	NP_619726	NM_138712	PPARgamma	-0.17648968308768828	0.8382074268230972	["GO:0006631","GO:0043281","GO:0048660","GO:0043065","GO:1905952","GO:0048608","GO:0060147","GO:0010660","GO:0001937","GO:0001525","GO:0030509","GO:1905562","GO:0010657","GO:0098531","GO:0040013","GO:0034390","GO:0071695","GO:0031348","GO:0036041","GO:0048511","GO:0071375","GO:0046942","GO:0060330","GO:0031406","GO:0051101","GO:0051235","GO:0015908","GO:0090101","GO:0090132","GO:0010633","GO:0008…	["fatty acid metabolic process","regulation of cysteine-type endopeptidase activity involved in apoptotic process","regulation of smooth muscle cell proliferation","positive regulation of apoptotic process","regulation of lipid localization","reproductive structure development","regulation of posttranscriptional gene silencing","regulation of muscle cell apoptotic process","negative regulation of…	query	0.3333333333333333	1.772421127259837E-4	7425.638261978004	2585.0	-3874.0
H__sapiens__1_-790724	H__sapiens__1_-790724	TGM2	TGM2	P21980	ENSP00000387642	7052	NP_945189	NM_198951	TGC	-0.1179236042385961	0.8887639478196334	["GO:0016746","GO:0006909","GO:0006874"]	["transferase activity, transferring acyl groups","phagocytosis","cellular calcium ion homeostasis"]	query	0.3333333333333333	1.5323322096230462E-4	1865.653722461546	1362.0	-3874.0
H__sapiens__1_-785971	H__sapiens__1_-785971	EIF2AK3	EIF2AK3	Q9NZJ5	ENSP00000498948	9451	NP_004827	NM_004836	PERK	-0.16336861974226213	0.8492780700440408	["GO:0097193","GO:0043281","GO:0035270","GO:0035966","GO:0031016","GO:0034976","GO:0031644","GO:0043555","GO:0070059","GO:0010950","GO:0006984","GO:1900180","GO:1990928","GO:2001233","GO:0035967","GO:0010573","GO:0031214","GO:0043558","GO:0006986","GO:0071216","GO:0001503","GO:0002062","GO:0110148","GO:0140467","GO:0045862","GO:0036490","GO:0031227","GO:0010574","GO:0034504","GO:0010952","GO:0018…	["intrinsic apoptotic signaling pathway","regulation of cysteine-type endopeptidase activity involved in apoptotic process","endocrine system development","response to topologically incorrect protein","pancreas development","response to endoplasmic reticulum stress","regulation of nervous system process","regulation of translation in response to stress","intrinsic apoptotic signaling pathway in r…	query	0.3333333333333333	1.5472690700912888E-4	2746.7169497539244	1465.0	-3874.0
H__sapiens__1_-774538	H__sapiens__1_-774538	MAVS	MAVS	Q7Z434	ENSP00000413749	57506	NP_065797	NM_020746	VISA	-0.1084978593125482	0.8971808153986288	["GO:0071359","GO:0046824","GO:0032608","GO:0032647","GO:0002699","GO:0007031","GO:0051222","GO:0042306","GO:0002702","GO:0032479","GO:0042579","GO:1900180","GO:0060337","GO:0061081","GO:0043122","GO:1900182","GO:0002833","GO:1904589","GO:0045069","GO:0002703","GO:0043331","GO:0032607","GO:0032606","GO:0061082","GO:0046822","GO:0033157","GO:0050691","GO:0048525","GO:0006606","GO:0032635","GO:0009…	["cellular response to dsRNA","positive regulation of nucleocytoplasmic transport","interferon-beta production","regulation of interferon-alpha production","positive regulation of immune effector process","peroxisome organization","positive regulation of protein transport","regulation of protein import into nucleus","positive regulation of production of molecular mediator of immune response","reg…	query	0.3333333333333333	1.4326647564469913E-4	936.08076611988	825.0	-3874.0
H__sapiens__1_-788324	H__sapiens__1_-788324	TBK1	TBK1	Q9UHD2	ENSP00000499102	29110	NP_037386	NM_013254	NAK	-0.15818908265299292	0.853688349049013	["GO:0010508","GO:0018209","GO:0032607","GO:0032608","GO:0032647","GO:0032606","GO:0033135","GO:0002756","GO:0032481","GO:0002221","GO:0019902","GO:0016241","GO:0070997","GO:0032648","GO:0032479","GO:0010506","GO:0007249","GO:0002224","GO:0018105","GO:0016236","GO:0001818","GO:0043122","GO:0018210"]	["positive regulation of autophagy","peptidyl-serine modification","interferon-alpha production","interferon-beta production","regulation of interferon-alpha production","type I interferon production","regulation of peptidyl-serine phosphorylation","MyD88-independent toll-like receptor signaling pathway","positive regulation of type I interferon production","pattern recognition receptor signaling…	query	0.3333333333333333	1.577784790154623E-4	3238.6877098428777	1631.0	-3874.0
H__sapiens__1_-788705	H__sapiens__1_-788705	IL3RA	IL3RA	P26951	ENSP00000414867	3563	NP_002174	NM_002183	CD123	-0.13441130781144145	0.8742304128468124	["GO:0140375","GO:0004896","GO:0009986"]	["immune receptor activity","cytokine receptor activity","cell surface"]	query	0.3333333333333333	1.639344262295082E-4	3829.002385284864	1735.0	-3874.0
H__sapiens__1_-785619	H__sapiens__1_-785619	HSPA4	HSPA4	P34932	ENSP00000481686	3308	NP_002145	NM_002154	HSPH2	-0.13384264531185414	0.8747276962784158	["GO:0070585","GO:0035966","GO:0051205","GO:0051204","GO:0006839","GO:0007006","GO:0006626","GO:0090151","GO:0072655"]	["protein localization to mitochondrion","response to topologically incorrect protein","protein insertion into membrane","protein insertion into mitochondrial membrane","mitochondrial transport","mitochondrial membrane organization","protein targeting to mitochondrion","establishment of protein localization to mitochondrial membrane","establishment of protein localization to mitochondrion"]	query	0.3333333333333333	1.467351430667645E-4	1544.1213018520002	1162.0	-3874.0
H__sapiens__1_-781386	H__sapiens__1_-781386	ATG3	ATG3	Q9NT62	ENSP00000420378	64422	NP_071933	NM_022488	PC3-96	-0.12195700741564741	0.8851864241365737	["GO:0007033","GO:0008637","GO:0120032","GO:1905037","GO:0060491","GO:0000151","GO:0061726","GO:1903008","GO:0016236","GO:1902115"]	["vacuole organization","apoptotic mitochondrial changes","regulation of plasma membrane bounded cell projection assembly","autophagosome organization","regulation of cell projection assembly","ubiquitin ligase complex","mitochondrion disassembly","organelle disassembly","macroautophagy","regulation of organelle assembly"]	query	0.3333333333333333	1.4374011786689664E-4	844.1843156345997	857.0	-3874.0
H__sapiens__1_-785718	H__sapiens__1_-785718	FPR1	FPR1	P21462	ENSP00000472936	2357	NP_002020	NM_002029	FPR	-0.14538488736870156	0.8646894210197186	["GO:0032147","GO:0101002","GO:0005766","GO:0043406","GO:0006874","GO:0001653","GO:0043405","GO:0005765","GO:0051480","GO:0004930","GO:0042582","GO:0140375","GO:0070820","GO:0007187","GO:0030667","GO:0071902","GO:0008528"]	["activation of protein kinase activity","ficolin-1-rich granule","primary lysosome","positive regulation of MAP kinase activity","cellular calcium ion homeostasis","peptide receptor activity","regulation of MAP kinase activity","lysosomal membrane","regulation of cytosolic calcium ion concentration","G protein-coupled receptor activity","azurophil granule","immune receptor activity","tertiary gr…	query	0.3333333333333333	1.5375153751537516E-4	2039.7018398213831	1540.0	-3874.0
H__sapiens__1_-774617	H__sapiens__1_-774617	SI	SI	P14410	ENSP00000419450	6476	NP_001032	NM_001041		-0.16271539506072014	0.8498330206748772	["GO:0007586","GO:0016798","GO:0004553"]	["digestion","hydrolase activity, acting on glycosyl bonds","hydrolase activity, hydrolyzing O-glycosyl compounds"]	query	0.3333333333333333	1.559332605644784E-4	3386.384282438255	1508.0	-3874.0
H__sapiens__1_-778370	H__sapiens__1_-778370	SLC10A2	SLC10A2	Q12908	ENSP00000245312	6555	NP_000443	NM_000452	ISBT	-0.17336789681375692	0.8408282199123853	["GO:1901618","GO:0022853","GO:0015850","GO:0022804","GO:0006869","GO:0008028","GO:0005319","GO:0015849","GO:0046942","GO:0015718","GO:0045177"]	["organic hydroxy compound transmembrane transporter activity","active ion transmembrane transporter activity","organic hydroxy compound transport","active transmembrane transporter activity","lipid transport","monocarboxylic acid transmembrane transporter activity","lipid transporter activity","organic acid transport","carboxylic acid transport","monocarboxylic acid transport","apical part of ce…	query	0.3333333333333333	1.6450074025333114E-4	4401.125066236277	1834.0	-3874.0
H__sapiens__1_-785849	H__sapiens__1_-785849	FGB	FGB	P02675	ENSP00000426757	2244	NP_005132	NM_005141		-0.13809899798369824	0.8710124590002177	["GO:0035296","GO:0009306","GO:0006959","GO:1903522","GO:0050818","GO:0010720","GO:0031091","GO:0097756","GO:0010769","GO:0010038","GO:2001234","GO:0051222","GO:0030168","GO:0016485","GO:0042742","GO:0072376","GO:0034774","GO:0009914","GO:2001236","GO:2001233","GO:0008625","GO:2001237","GO:1904019","GO:0046887","GO:0007596","GO:1900047","GO:0050817","GO:0097746","GO:0030193","GO:0030072","GO:0003…	["regulation of tube diameter","protein secretion","humoral immune response","regulation of blood circulation","regulation of coagulation","positive regulation of cell development","platelet alpha granule","negative regulation of blood vessel diameter","regulation of cell morphogenesis involved in differentiation","response to metal ion","negative regulation of apoptotic signaling pathway","posit…	query	0.3333333333333333	1.5508684863523573E-4	2419.290744818043	1488.0	-3874.0
H__sapiens__1_-775830	H__sapiens__1_-775830	CD79A	CD79A	P11912	ENSP00000468922	973	NP_067612	NM_021601	MB-1	-0.18089937921109586	0.8345193244641511	["GO:0042113","GO:0050851","GO:0043235","GO:0098857","GO:0032943","GO:0005770","GO:0009986","GO:0098802","GO:0030098","GO:0046651","GO:0070661"]	["B cell activation","antigen receptor-mediated signaling pathway","receptor complex","membrane microdomain","mononuclear cell proliferation","late endosome","cell surface","plasma membrane signaling receptor complex","lymphocyte differentiation","lymphocyte proliferation","leukocyte proliferation"]	query	0.3333333333333333	1.5800284405119292E-4	3176.0181196488065	1582.0	-3874.0
H__sapiens__1_-786528	H__sapiens__1_-786528	AMY1B	AMY1B	ENSG00000174876	ENSP00000393584	277	NP_001008219	NM_001008218		-0.0010656874064831159	0.9989348802366798	["GO:0016798","GO:0004553"]	["hydrolase activity, acting on glycosyl bonds","hydrolase activity, hydrolyzing O-glycosyl compounds"]	query	0.3333333333333333	1.2874983906270118E-4	0.045164348273652344	33.0	-3874.0
H__sapiens__1_-781073	H__sapiens__1_-781073	ITGA10	ITGA10	O75578	ENSP00000439894	8515	NP_003628	NM_003637		-0.1960149666022826	0.8219999320400633	["GO:0005887","GO:0008305","GO:0031589","GO:0043235","GO:0098631","GO:0098802","GO:0098636"]	["integral component of plasma membrane","integrin complex","cell-substrate adhesion","receptor complex","cell adhesion mediator activity","plasma membrane signaling receptor complex","protein complex involved in cell adhesion"]	query	0.3333333333333333	1.7421602787456446E-4	6782.723066956164	2263.0	-3874.0
H__sapiens__1_-774662	H__sapiens__1_-774662	IL5RA	IL5RA	Q01344	ENSP00000412209	3568	NP_783855	NM_175728	IL5R	-0.09944799490347415	0.9053370307839479	["GO:0140375","GO:0004896","GO:0070663","GO:0009986","GO:0070661"]	["immune receptor activity","cytokine receptor activity","regulation of leukocyte proliferation","cell surface","leukocyte proliferation"]	query	0.3333333333333333	1.4465499783017504E-4	1044.8787310072612	953.0	-3874.0
H__sapiens__1_-779574	H__sapiens__1_-779574	CCNB1	CCNB1	P14635	ENSP00000426230	891	NP_114172	NM_031966	CCNB	-0.21735300651230222	0.8046458739305984	["GO:0072422","GO:0045930","GO:0072413","GO:0051985","GO:0072331","GO:0030295","GO:0022904","GO:0071173","GO:2000134","GO:1902751","GO:0042770","GO:0000075","GO:0051983","GO:1904029","GO:0010965","GO:0010639","GO:0045841","GO:0044819","GO:0044774","GO:2000816","GO:0044783","GO:0042775","GO:1902807","GO:0051081","GO:1905818","GO:0030330","GO:0000077","GO:0043161","GO:1901991","GO:0000082","GO:0016…	["signal transduction involved in DNA damage checkpoint","negative regulation of mitotic cell cycle","signal transduction involved in mitotic cell cycle checkpoint","negative regulation of chromosome segregation","signal transduction by p53 class mediator","protein kinase activator activity","respiratory electron transport chain","spindle assembly checkpoint","negative regulation of G1/S transiti…	query	0.3333333333333333	1.4958863126402394E-4	1940.4859320535227	1399.0	-3874.0
H__sapiens__1_-777912	H__sapiens__1_-777912	A1BG	A1BG	P04217	ENSP00000470909	1	NP_570602	NM_130786		-0.061574673455191874	0.9402827289575679	["GO:0101002","GO:0034774","GO:0031091"]	["ficolin-1-rich granule","secretory granule lumen","platelet alpha granule"]	query	0.3333333333333333	1.4624159110851126E-4	1363.3698416921009	926.0	-3874.0
H__sapiens__1_-777895	H__sapiens__1_-777895	ADCY7	ADCY7	P51828	ENSP00000501223	113	NP_001272986	NM_001286057	KIAA0037	-0.180762604576997	0.8346334733455609	["GO:0071248","GO:0097306","GO:0009260","GO:0007188","GO:0010038","GO:0016849","GO:0009975","GO:0043434","GO:0071241","GO:0033762","GO:1900015","GO:0007187","GO:0006164","GO:0046058","GO:0002250","GO:0030104","GO:0050727","GO:0009187","GO:0052652","GO:0032147","GO:0009190","GO:0009165","GO:0002532","GO:0003014","GO:1901653","GO:0072522","GO:0019933","GO:0071375","GO:0046390","GO:0002534","GO:0009…	["cellular response to metal ion","cellular response to alcohol","ribonucleotide biosynthetic process","adenylate cyclase-modulating G protein-coupled receptor signaling pathway","response to metal ion","phosphorus-oxygen lyase activity","cyclase activity","response to peptide hormone","cellular response to inorganic substance","response to glucagon","regulation of cytokine production involved in…	query	0.3333333333333333	1.5780337699226762E-4	3082.4334291594473	1659.0	-3874.0
H__sapiens__1_-776884	H__sapiens__1_-776884	HBEGF	HBEGF	Q99075	ENSP00000230990	1839	NP_001936	NM_001945	HEGFL	-0.13058248144264825	0.8775841055603997	["GO:0005539","GO:1903036","GO:2000273","GO:0061098","GO:0030662","GO:1901681","GO:0042058","GO:0030139","GO:0007173","GO:1903034","GO:0050730","GO:0043491","GO:0050731","GO:0010469","GO:0061097","GO:0018212","GO:0030666","GO:0007176","GO:0030135","GO:0070851","GO:0030136","GO:0045742","GO:1901184","GO:0030665","GO:0018108","GO:1901186","GO:0061041","GO:0038127","GO:0045334","GO:1901185","GO:0051…	["glycosaminoglycan binding","positive regulation of response to wounding","positive regulation of signaling receptor activity","positive regulation of protein tyrosine kinase activity","coated vesicle membrane","sulfur compound binding","regulation of epidermal growth factor receptor signaling pathway","endocytic vesicle","epidermal growth factor receptor signaling pathway","regulation of respon…	query	0.3333333333333333	1.4896469536719798E-4	1181.6337895541567	1184.0	-3874.0
H__sapiens__1_-780426	H__sapiens__1_-780426	ABI2	ABI2	Q9NYB9	ENSP00000414703	10152	NP_005750	NM_005759	SSH3BP2	-0.11835205076003726	0.8883832415597679	["GO:0030838","GO:0030832","GO:0044309","GO:0030041","GO:0016358","GO:0050807","GO:0098858","GO:0018212","GO:0034314","GO:0030425","GO:0048813","GO:0008064","GO:0007265","GO:0043010","GO:0050808","GO:0017048","GO:0110053","GO:0050803","GO:0099175","GO:0098794","GO:0106027","GO:0099173","GO:0045010","GO:0090596","GO:0032273","GO:0032535","GO:0060090","GO:0044389","GO:0031252","GO:0001654","GO:0034…	["positive regulation of actin filament polymerization","regulation of actin filament length","neuron spine","actin filament polymerization","dendrite development","regulation of synapse organization","actin-based cell projection","peptidyl-tyrosine modification","Arp2/3 complex-mediated actin nucleation","dendrite","dendrite morphogenesis","regulation of actin polymerization or depolymerization"…	query	0.3333333333333333	1.479727730097662E-4	1433.4377661766177	1160.0	-3874.0
H__sapiens__1_-781920	H__sapiens__1_-781920	DGKZ	DGKZ	Q13574	ENSP00000437060	8525	NP_963291	NM_201533	hDGKzeta	-0.17565561504610563	0.8389068404887741	["GO:0006639","GO:0035249","GO:0045834","GO:0043550","GO:0045017","GO:0090218","GO:0050852","GO:0050856","GO:0031252","GO:0006638","GO:0030258","GO:0050851","GO:0050854","GO:0050804","GO:0008654","GO:0046473","GO:0002683","GO:0050858","GO:0046474","GO:0099177","GO:0007596","GO:0007599","GO:0050817","GO:0019216"]	["acylglycerol metabolic process","synaptic transmission, glutamatergic","positive regulation of lipid metabolic process","regulation of lipid kinase activity","glycerolipid biosynthetic process","positive regulation of lipid kinase activity","T cell receptor signaling pathway","regulation of T cell receptor signaling pathway","cell leading edge","neutral lipid metabolic process","lipid modificat…	query	0.3333333333333333	1.4792899408284024E-4	1375.3398182420644	1076.0	-3874.0
H__sapiens__1_-775743	H__sapiens__1_-775743	LYL1	LYL1	P12980	ENSP00000468122	4066	NP_005574	NM_005583	bHLHa18	-0.17148952714674617	0.8424090904006099	["GO:0042113","GO:0071695","GO:0030098","GO:0021700"]	["B cell activation","anatomical structure maturation","lymphocyte differentiation","developmental maturation"]	query	0.3333333333333333	1.6463615409944023E-4	4317.967122749574	1738.0	-3874.0
H__sapiens__1_-777248	H__sapiens__1_-777248	SOS1	SOS1	Q07889	ENSP00000393899	6654	NP_005624	NM_005633	GINGF	-0.14280615517847198	0.8669221009688302	["GO:0032868","GO:0017048","GO:0007409","GO:0005085","GO:1901653","GO:0038127","GO:0038179","GO:0097485","GO:0032869","GO:0071375","GO:0038093","GO:0043434"]	["response to insulin","Rho GTPase binding","axonogenesis","guanyl-nucleotide exchange factor activity","cellular response to peptide","ERBB signaling pathway","neurotrophin signaling pathway","neuron projection guidance","cellular response to insulin stimulus","cellular response to peptide hormone stimulus","Fc receptor signaling pathway","response to peptide hormone"]	query	0.3333333333333333	1.5605493133583021E-4	2979.7166865948593	1863.0	-3874.0
H__sapiens__1_-774331	H__sapiens__1_-774331	ULK2	ULK2	Q8IYT8	ENSP00000467277	9706	NP_055498	NM_014683	Unc51.2	-0.12756673325546636	0.8802346729488907	["GO:0010508","GO:0051817","GO:0048589","GO:0048588","GO:0044068","GO:1990138","GO:0035821","GO:0007409","GO:0044003","GO:0031667","GO:0010506","GO:0009991","GO:0060560","GO:0000407","GO:0051701"]	["positive regulation of autophagy","modulation of process of other organism involved in symbiotic interaction","developmental growth","developmental cell growth","modulation by symbiont of host cellular process","neuron projection extension","modulation of process of other organism","axonogenesis","modulation by symbiont of host process","response to nutrient levels","regulation of autophagy","r…	query	0.3333333333333333	1.4738393515106854E-4	1372.4889340225322	1067.0	-3874.0
H__sapiens__1_-775649	H__sapiens__1_-775649	LAPTM4B	LAPTM4B	Q86VI4	ENSP00000482533	55353	NP_060877	NM_018407	LC27	-0.15395555717131307	0.8573101214516647	["GO:0016197","GO:0044088","GO:0044389","GO:1903362","GO:0071634","GO:0005770","GO:0071604","GO:1901981","GO:0071985","GO:0046625","GO:0031330","GO:0010008","GO:0080171","GO:0007033","GO:0035091","GO:0009895","GO:0007040","GO:0031902","GO:0016050","GO:0090559","GO:0001818","GO:0007039"]	["endosomal transport","regulation of vacuole organization","ubiquitin-like protein ligase binding","regulation of cellular protein catabolic process","regulation of transforming growth factor beta production","late endosome","transforming growth factor beta production","phosphatidylinositol phosphate binding","multivesicular body sorting pathway","sphingolipid binding","negative regulation of ce…	query	0.3333333333333333	1.5384615384615385E-4	2288.808243538006	1357.0	-3874.0
H__sapiens__1_-780641	H__sapiens__1_-780641	CUL4A	CUL4A	Q13619	ENSP00000481782	8451	NP_003580	NM_003589		-0.17644000309485222	0.8382490699964646	["GO:0032508","GO:0031334","GO:0044843","GO:0044389","GO:0000151","GO:0080008","GO:0043161","GO:0032392","GO:0031461"]	["DNA duplex unwinding","positive regulation of protein-containing complex assembly","cell cycle G1/S phase transition","ubiquitin-like protein ligase binding","ubiquitin ligase complex","Cul4-RING E3 ubiquitin ligase complex","proteasome-mediated ubiquitin-dependent protein catabolic process","DNA geometric change","cullin-RING ubiquitin ligase complex"]	query	0.3333333333333333	1.4427932477276007E-4	1155.436692335023	987.0	-3874.0
H__sapiens__1_-777879	H__sapiens__1_-777879	TRIM25	TRIM25	Q14258	ENSP00000498158	7706	NP_005073	NM_005082	ZNF147	-0.16799152149668062	0.8453610020503364	["GO:0051091","GO:0046718","GO:0002753","GO:0034976","GO:0044409","GO:0034341","GO:0002221","GO:0030522","GO:0032479","GO:0039528","GO:0052126","GO:0007249","GO:0051607","GO:0050792","GO:0004842","GO:0043122","GO:0051701","GO:0098586","GO:0032606","GO:0061659","GO:0071897","GO:0009615","GO:0071346","GO:0035890","GO:0019076","GO:0035891","GO:0019058","GO:0052372","GO:1903900","GO:0043161","GO:0001…	["positive regulation of DNA-binding transcription factor activity","viral entry into host cell","cytoplasmic pattern recognition receptor signaling pathway","response to endoplasmic reticulum stress","entry into host","response to interferon-gamma","pattern recognition receptor signaling pathway","intracellular receptor signaling pathway","regulation of type I interferon production","cytoplasmic…	query	0.3333333333333333	1.5762925598991173E-4	2994.5448839315295	1578.0	-3874.0
H__sapiens__1_-785409	H__sapiens__1_-785409	FASN	FASN	P49327	ENSP00000490921	2194	NP_004095	NM_004104	SDR27X1	-0.13104469419171835	0.8771785687277954	["GO:1902653","GO:1901568","GO:1902652","GO:0035383","GO:0006695","GO:1901570","GO:0071616","GO:0008203","GO:0009260","GO:0006637","GO:0033865","GO:0106118","GO:0006066","GO:0033875","GO:0016126","GO:0034033","GO:0006694","GO:0050810","GO:0006164","GO:0019218","GO:1902930","GO:0019216","GO:1901617","GO:0009165","GO:0035384","GO:0044272","GO:0046890","GO:0001503","GO:0072522","GO:0046165","GO:0008…	["secondary alcohol biosynthetic process","fatty acid derivative metabolic process","secondary alcohol metabolic process","thioester metabolic process","cholesterol biosynthetic process","fatty acid derivative biosynthetic process","acyl-CoA biosynthetic process","cholesterol metabolic process","ribonucleotide biosynthetic process","acyl-CoA metabolic process","nucleoside bisphosphate metabolic p…	query	0.3333333333333333	1.4801657785671994E-4	1476.3441337391553	1075.0	-3874.0
H__sapiens__1_-773479	H__sapiens__1_-773479	RELT	RELT	Q969Z4	ENSP00000440562	84957	NP_689408	NM_152222	TNFRSF19L	-0.06778131947850988	0.9344648004851261	["GO:0042476"]	["odontogenesis"]	query	0.3333333333333333	1.588057805304113E-4	3516.3196941142987	1567.0	-3874.0
H__sapiens__1_-778173	H__sapiens__1_-778173	PFKFB2	PFKFB2	O60825	ENSP00000484988	5208	NP_006203	NM_006212		-0.09193202471343472	0.9121671522613107	["GO:0046939","GO:1903578","GO:0009132","GO:0045981","GO:0046034","GO:0043467","GO:0006757","GO:0009185","GO:1903580","GO:0006109","GO:0009135","GO:0016052","GO:0006140","GO:0019200","GO:1900544","GO:0006110","GO:0016791","GO:0019203","GO:0050308","GO:1900542","GO:0009179","GO:0006096","GO:0006090","GO:0046031","GO:0043470","GO:0006165","GO:0062013","GO:0045913"]	["nucleotide phosphorylation","regulation of ATP metabolic process","nucleoside diphosphate metabolic process","positive regulation of nucleotide metabolic process","ATP metabolic process","regulation of generation of precursor metabolites and energy","ATP generation from ADP","ribonucleoside diphosphate metabolic process","positive regulation of ATP metabolic process","regulation of carbohydrate…	query	0.3333333333333333	1.4634860237084735E-4	1415.910120485674	960.0	-3874.0
H__sapiens__1_-788756	H__sapiens__1_-788756	SV2B	SV2B	Q7L1I2	ENSP00000450992	9899	NP_055663	NM_014848	KIAA0735	-0.148004803480201	0.8624269722812097	["GO:0070382","GO:0098793","GO:0030133","GO:0030658"]	["exocytic vesicle","presynapse","transport vesicle","transport vesicle membrane"]	query	0.3333333333333333	1.5363343063450608E-4	2196.1199115430204	1376.0	-3874.0
H__sapiens__1_-788761	H__sapiens__1_-788761	PRKG1	PRKG1	Q13976	ENSP00000499822	5592	NP_006249	NM_006258	PRKGR1B	-0.14578632801552535	0.8643423692042561	["GO:0014910","GO:0048660","GO:0050818","GO:0050866","GO:0014812","GO:0034110","GO:0051271","GO:0070527","GO:1903034","GO:1900046","GO:0030168","GO:0048662","GO:2000146","GO:0022408","GO:0007596","GO:1904752","GO:1900047","GO:0050817","GO:0007162","GO:0030193","GO:1903035","GO:0040013","GO:0048659","GO:0010543","GO:0030336","GO:0030195","GO:0014909","GO:0034109","GO:1904738","GO:0099106","GO:1990…	["regulation of smooth muscle cell migration","regulation of smooth muscle cell proliferation","regulation of coagulation","negative regulation of cell activation","muscle cell migration","regulation of homotypic cell-cell adhesion","negative regulation of cellular component movement","platelet aggregation","regulation of response to wounding","regulation of hemostasis","platelet activation","neg…	query	0.3333333333333333	1.623640201331385E-4	4188.165845172349	2049.0	-3874.0
H__sapiens__1_-778975	H__sapiens__1_-778975	GADD45G	GADD45G	O95257	ENSP00000364924	10912	NP_006696	NM_006705	GRP17	-0.16208502579262102	0.8503688981767359	["GO:0001659","GO:0032147","GO:0032872","GO:0031098","GO:0043406","GO:0120161","GO:0043405","GO:0106106","GO:0070304","GO:0046328","GO:0038066","GO:0007254","GO:0070302","GO:0051403","GO:1990845","GO:0032874","GO:1900744","GO:0071902"]	["temperature homeostasis","activation of protein kinase activity","regulation of stress-activated MAPK cascade","stress-activated protein kinase signaling cascade","positive regulation of MAP kinase activity","regulation of cold-induced thermogenesis","regulation of MAP kinase activity","cold-induced thermogenesis","positive regulation of stress-activated protein kinase signaling cascade","regul…	query	0.3333333333333333	1.6241676140977748E-4	3625.904636908137	1716.0	-3874.0
H__sapiens__1_-790425	H__sapiens__1_-790425	TFDP1	TFDP1	Q14186	ENSP00000438450	7027	NP_009042	NM_007111	DRTF1	-0.16757047670325365	0.845717011841591	["GO:0072422","GO:1902110","GO:1905710","GO:0045930","GO:0072413","GO:0072331","GO:1905475","GO:0005667","GO:2000134","GO:0097345","GO:0051222","GO:0051205","GO:0035794","GO:1901030","GO:0007006","GO:1901028","GO:0045023","GO:1902108","GO:1902400","GO:0090559","GO:1902808","GO:0042770","GO:0000075","GO:0071156","GO:0044773","GO:0006839","GO:0033157","GO:0072655","GO:0007093","GO:0010821","GO:0044…	["signal transduction involved in DNA damage checkpoint","positive regulation of mitochondrial membrane permeability involved in apoptotic process","positive regulation of membrane permeability","negative regulation of mitotic cell cycle","signal transduction involved in mitotic cell cycle checkpoint","signal transduction by p53 class mediator","regulation of protein localization to membrane","tr…	query	0.3333333333333333	1.5080681646810435E-4	2072.700247004112	1358.0	-3874.0
H__sapiens__1_-775978	H__sapiens__1_-775978	HOXA1	HOXA1	ENSG00000105991	ENSP00000494260	3198	NP_705873	NM_153620	HOX1F	-0.16267570261798567	0.8498667532928448	["GO:0048568","GO:0048562","GO:0043009","GO:1904888","GO:0009416","GO:0001501","GO:0048704","GO:0048706","GO:0048705","GO:0048598","GO:0043583","GO:0090596","GO:0060840","GO:0009792","GO:0035148","GO:0007610","GO:0007423"]	["embryonic organ development","embryonic organ morphogenesis","chordate embryonic development","cranial skeletal system development","response to light stimulus","skeletal system development","embryonic skeletal system morphogenesis","embryonic skeletal system development","skeletal system morphogenesis","embryonic morphogenesis","ear development","sensory organ morphogenesis","artery developmen…	query	0.3333333333333333	1.589067217543302E-4	3432.0141429866803	1597.0	-3874.0
H__sapiens__1_-778890	H__sapiens__1_-778890	ADCY4	ADCY4	Q8NFM4	ENSP00000495865	196883	NP_640340	NM_139247	AC4	-0.07438939511240333	0.9283101440201131	["GO:0009260","GO:0007188","GO:0016849","GO:0009975","GO:0043434","GO:0033762","GO:0007187","GO:0006164","GO:0046058","GO:0030104","GO:0009187","GO:0052652","GO:0032147","GO:0009190","GO:0009165","GO:0003014","GO:1901653","GO:0072522","GO:0019933","GO:0071375","GO:0046390","GO:0009152","GO:0016829","GO:0019935","GO:1901293","GO:0019901","GO:0050891"]	["ribonucleotide biosynthetic process","adenylate cyclase-modulating G protein-coupled receptor signaling pathway","phosphorus-oxygen lyase activity","cyclase activity","response to peptide hormone","response to glucagon","G protein-coupled receptor signaling pathway, coupled to cyclic nucleotide second messenger","purine nucleotide biosynthetic process","cAMP metabolic process","water homeostasi…	query	0.3333333333333333	1.5401201293700908E-4	2343.981286287722	1357.0	-3874.0
H__sapiens__1_-790380	H__sapiens__1_-790380	AVPR1B	AVPR1B	P47901	ENSP00000356094	553	NP_000698	NM_000707	AVPR3	-0.16487861436503945	0.8479966324504515	["GO:0035296","GO:0010232","GO:0071715","GO:1903522","GO:0019751","GO:0006869","GO:0097756","GO:0032370","GO:0006066","GO:1905952","GO:1903793","GO:0050886","GO:0001990","GO:0006109","GO:1902932","GO:0008528","GO:1902930","GO:0015718","GO:0097746","GO:0060191","GO:0003018","GO:0032303","GO:0010518","GO:0032309","GO:0043270","GO:0043255","GO:0044070","GO:0010863","GO:0008217","GO:0060193","GO:0016…	["regulation of tube diameter","vascular transport","icosanoid transport","regulation of blood circulation","polyol metabolic process","lipid transport","negative regulation of blood vessel diameter","positive regulation of lipid transport","alcohol metabolic process","regulation of lipid localization","positive regulation of anion transport","endocrine process","regulation of systemic arterial b…	query	0.3333333333333333	1.6949152542372882E-4	5435.636110102692	2163.0	-3874.0
H__sapiens__1_-784228	H__sapiens__1_-784228	COX6C	COX6C	P09669	ENSP00000429991	1345	NP_004365	NM_004374		-0.19856281688249058	0.8199082650415699	["GO:0015980","GO:0009060","GO:0042775","GO:0022900","GO:0046034","GO:0045333","GO:0006119","GO:0019646","GO:0022904","GO:0042773"]	["energy derivation by oxidation of organic compounds","aerobic respiration","mitochondrial ATP synthesis coupled electron transport","electron transport chain","ATP metabolic process","cellular respiration","oxidative phosphorylation","aerobic electron transport chain","respiratory electron transport chain","ATP synthesis coupled electron transport"]	query	0.5	1.5855398763278897E-4	4240.1088974489285	1648.0	-3874.0
H__sapiens__1_-773814	H__sapiens__1_-773814	BCL3	BCL3	P20749	ENSP00000393731	602	NP_005169	NM_005178	D19S37	-0.0567555505378756	0.9448250031033698	["GO:0097193","GO:0008630","GO:0097696","GO:0060090","GO:0046425","GO:0009416","GO:1904892","GO:0072331","GO:0009411","GO:0045185","GO:0051235","GO:0051651","GO:0072332","GO:0038061","GO:0032637","GO:0007259","GO:0032677","GO:0051098","GO:1904893","GO:0001818","GO:0034504","GO:0042770"]	["intrinsic apoptotic signaling pathway","intrinsic apoptotic signaling pathway in response to DNA damage","receptor signaling pathway via STAT","molecular adaptor activity","regulation of receptor signaling pathway via JAK-STAT","response to light stimulus","regulation of receptor signaling pathway via STAT","signal transduction by p53 class mediator","response to UV","maintenance of protein loc…	query	0.3333333333333333	1.392563709789723E-4	508.6835128885441	678.0	-3874.0
H__sapiens__1_-783075	H__sapiens__1_-783075	CBR1	CBR1	P16152	ENSP00000434613	873	NP_001748	NM_001757	SDR21C1	-0.17999314319888887	0.8352759387126212	["GO:0006631","GO:1901568","GO:0006693","GO:0006775","GO:1901570","GO:0001676","GO:0019369","GO:0006766","GO:0120254","GO:0016614","GO:0046457","GO:0006633","GO:0046456","GO:0006690","GO:0001516","GO:0006636","GO:0033559","GO:0006692","GO:0016651","GO:0072330","GO:0016616","GO:0046394","GO:0016053"]	["fatty acid metabolic process","fatty acid derivative metabolic process","prostaglandin metabolic process","fat-soluble vitamin metabolic process","fatty acid derivative biosynthetic process","long-chain fatty acid metabolic process","arachidonic acid metabolic process","vitamin metabolic process","olefinic compound metabolic process","oxidoreductase activity, acting on CH-OH group of donors","p…	query	0.3333333333333333	1.606425702811245E-4	3803.8605401367427	1697.0	-3874.0
[truncated: 3,386 more rows]
