# Supplementary material for: Integrating Multi-Omics Analysis for Enhanced Diagnosis and Treatment of Glioblastoma: A Comprehensive Data-Driven Approach
Source: Preprints.org preprint supplement (doi:10.20944/preprints202303.0355.v1), 2023-03-20
Supplement: Supplementary file 2 [file Supplementary Table 1.xlsx]

## Sheet: Sheet1
EGFR	MYC	SUZ12	SRPK2
NOTCH2	NOTCH3	MTOR	BMI1
NOTCH1	HES1	PTEN	ATRX
JAG2	STAG2	NDRG1	ERN1
JAG1	PIM1	WT1	MAPKAPK3
RUNX3	BRD4	H3C1	CDC42EP4
VEGFA	FOSL2	H3C2	SEPTIN14
PDGFRA	BRD2	CSTB
PIK3CA	CDK6	TRIM33
PIK3R1	H2AX
PROM1	IL1B
IFNAR1	HIF1A
IFNA2	MAPK8
MET	PDK2
PTK2	AKT1
APC	IRAK1
HEY1	PINK1
ERBB2	LZTR1
RECK	RUVBL1
GSTT1	PRKD3
EGF	GSK3A
RPS6KA3	TNFSF10
NF1	CFLAR
PRKCB	NLK
GABARAPL2	SHANK2
GUCY2F	TAF1L
PRKN	TAF9
RAC1	SIK1
CDC42BPG	MAP3K7
PRKCA	FAT1
HSPB8	EZH2
CD9	BHLHE40
CTSB	H3-3A
CSTA	POLK
IDH1	ZBTB7A
IDH2	NCOR1
CDK3	CTSK
CDK2	ARID4B
TES	GSK3B
MGMT	STYK1
	AKT3
	CTNNB1
	CTNND2
	RUNX1
	IL2
	PSMC3
	STKLD1
	HSPA8
	CHI3L1
	MAPK3
	DUSP6
	PML
	TERT
	DYRK2
	DAXX
	MDM4
	MKLN1
	GDNF
	HSP90AA1
	INSRR
	SMAD2
	EPHB6
	MMP2
	MMP9
	CXCL8
	FN1
	TGM2
	TRIB3
	LTBP4
	DIAPH3
	BCHE

## Sheet: Sheet2
EGFR	epidermal growth factor receptor [Source:HGNC Symbol;Acc:HGNC:3236]
NOTCH2	notch 2 [Source:HGNC Symbol;Acc:HGNC:7882]
NOTCH1	notch 1 [Source:HGNC Symbol;Acc:HGNC:7881]
JAG2	jagged 2 [Source:HGNC Symbol;Acc:HGNC:6189]
JAG1	jagged 1 [Source:HGNC Symbol;Acc:HGNC:6188]
RUNX3	runt related transcription factor 3 [Source:HGNC Symbol;Acc:HGNC:10473]
VEGFA	vascular endothelial growth factor A [Source:HGNC Symbol;Acc:HGNC:12680]
PDGFRA	platelet derived growth factor receptor alpha [Source:HGNC Symbol;Acc:HGNC:8803]
PIK3CA	phosphatidylinositol-4,5-bisphosphate 3-kinase catalytic subunit alpha [Source:HGNC Symbol;Acc:HGNC:8975]
PIK3R1	phosphoinositide-3-kinase regulatory subunit 1 [Source:HGNC Symbol;Acc:HGNC:8979]
PROM1	prominin 1 [Source:HGNC Symbol;Acc:HGNC:9454]
IFNAR1	interferon alpha and beta receptor subunit 1 [Source:HGNC Symbol;Acc:HGNC:5432]
IFNA2	interferon, alpha 2 [Source:HGNC Symbol;Acc:HGNC:5423]
MET	MET proto-oncogene, receptor tyrosine kinase [Source:HGNC Symbol;Acc:HGNC:7029]
PTK2	protein tyrosine kinase 2 [Source:HGNC Symbol;Acc:HGNC:9611]
APC	adenomatous polyposis coli [Source:HGNC Symbol;Acc:HGNC:583]
HEY1	hes related family bHLH transcription factor with YRPW motif 1 [Source:HGNC Symbol;Acc:HGNC:4880]
ERBB2	erb-b2 receptor tyrosine kinase 2 [Source:HGNC Symbol;Acc:HGNC:3430]
RECK	reversion inducing cysteine rich protein with kazal motifs [Source:HGNC Symbol;Acc:HGNC:11345]
GSTT1	glutathione S-transferase theta 1 [Source:HGNC Symbol;Acc:HGNC:4641]
EGF	epidermal growth factor [Source:HGNC Symbol;Acc:HGNC:3229]
RPS6KA3	ribosomal protein S6 kinase A3 [Source:HGNC Symbol;Acc:HGNC:10432]
NF1	neurofibromin 1 [Source:HGNC Symbol;Acc:HGNC:7765]
PRKCB	protein kinase C beta [Source:HGNC Symbol;Acc:HGNC:9395]
GABARAPL2	GABA type A receptor associated protein like 2 [Source:HGNC Symbol;Acc:HGNC:13291]
GUCY2F	guanylate cyclase 2F, retinal [Source:HGNC Symbol;Acc:HGNC:4691]
RAC1	ras-related C3 botulinum toxin substrate 1 (rho family, small GTP binding protein Rac1) [Source:HGNC Symbol;Acc:HGNC:9801]
CDC42BPG	CDC42 binding protein kinase gamma [Source:HGNC Symbol;Acc:HGNC:29829]
PRKCA	protein kinase C alpha [Source:HGNC Symbol;Acc:HGNC:9393]
HSPB8	heat shock protein family B (small) member 8 [Source:HGNC Symbol;Acc:HGNC:30171]
CD9	CD9 molecule [Source:HGNC Symbol;Acc:HGNC:1709]
CTSB	cathepsin B [Source:HGNC Symbol;Acc:HGNC:2527]
CSTA	cystatin A [Source:HGNC Symbol;Acc:HGNC:2481]
IDH1	isocitrate dehydrogenase (NADP(+)) 1, cytosolic [Source:HGNC Symbol;Acc:HGNC:5382]
IDH2	isocitrate dehydrogenase (NADP(+)) 2, mitochondrial [Source:HGNC Symbol;Acc:HGNC:5383]
CDK3	cyclin dependent kinase 3 [Source:HGNC Symbol;Acc:HGNC:1772]
CDK2	cyclin dependent kinase 2 [Source:HGNC Symbol;Acc:HGNC:1771]
TES	testin LIM domain protein [Source:HGNC Symbol;Acc:HGNC:14620]
MGMT	O-6-methylguanine-DNA methyltransferase [Source:HGNC Symbol;Acc:HGNC:7059]
MYC	v-myc avian myelocytomatosis viral oncogene homolog [Source:HGNC Symbol;Acc:HGNC:7553]
NOTCH3	notch 3 [Source:HGNC Symbol;Acc:HGNC:7883]
HES1	hes family bHLH transcription factor 1 [Source:HGNC Symbol;Acc:HGNC:5192]
STAG2	stromal antigen 2 [Source:HGNC Symbol;Acc:HGNC:11355]
PIM1	Pim-1 proto-oncogene, serine/threonine kinase [Source:HGNC Symbol;Acc:HGNC:8986]
BRD4	bromodomain containing 4 [Source:HGNC Symbol;Acc:HGNC:13575]
FOSL2	FOS like 2, AP-1 transcription factor subunit [Source:HGNC Symbol;Acc:HGNC:3798]
BRD2	bromodomain containing 2 [Source:HGNC Symbol;Acc:HGNC:1103]
CDK6	cyclin dependent kinase 6 [Source:HGNC Symbol;Acc:HGNC:1777]
H2AFX (H2AX)	H2A histone family member X [Source:HGNC Symbol;Acc:HGNC:4739]
IL1B	interleukin 1 beta [Source:HGNC Symbol;Acc:HGNC:5992]
HIF1A	hypoxia inducible factor 1 alpha subunit [Source:HGNC Symbol;Acc:HGNC:4910]
MAPK8	mitogen-activated protein kinase 8 [Source:HGNC Symbol;Acc:HGNC:6881]
PDK2	pyruvate dehydrogenase kinase 2 [Source:HGNC Symbol;Acc:HGNC:8810]
AKT1	AKT serine/threonine kinase 1 [Source:HGNC Symbol;Acc:HGNC:391]
IRAK1	interleukin 1 receptor associated kinase 1 [Source:HGNC Symbol;Acc:HGNC:6112]
PINK1	PTEN induced putative kinase 1 [Source:HGNC Symbol;Acc:HGNC:14581]
LZTR1	leucine-zipper-like transcription regulator 1 [Source:HGNC Symbol;Acc:HGNC:6742]
RUVBL1	RuvB like AAA ATPase 1 [Source:HGNC Symbol;Acc:HGNC:10474]
PRKD3	protein kinase D3 [Source:HGNC Symbol;Acc:HGNC:9408]
GSK3A	glycogen synthase kinase 3 alpha [Source:HGNC Symbol;Acc:HGNC:4616]
TNFSF10	tumor necrosis factor superfamily member 10 [Source:HGNC Symbol;Acc:HGNC:11925]
CFLAR	CASP8 and FADD like apoptosis regulator [Source:HGNC Symbol;Acc:HGNC:1876]
NLK	nemo like kinase [Source:HGNC Symbol;Acc:HGNC:29858]
SHANK2	SH3 and multiple ankyrin repeat domains 2 [Source:HGNC Symbol;Acc:HGNC:14295]
TAF1L	TATA-box binding protein associated factor 1 like [Source:HGNC Symbol;Acc:HGNC:18056]
TAF9	TATA-box binding protein associated factor 9 [Source:HGNC Symbol;Acc:HGNC:11542]
SIK1	salt inducible kinase 1 [Source:HGNC Symbol;Acc:HGNC:11142]
MAP3K7	mitogen-activated protein kinase kinase kinase 7 [Source:HGNC Symbol;Acc:HGNC:6859]
FAT1	FAT atypical cadherin 1 [Source:HGNC Symbol;Acc:HGNC:3595]
EZH2	enhancer of zeste 2 polycomb repressive complex 2 subunit [Source:HGNC Symbol;Acc:HGNC:3527]
BHLHE40	basic helix-loop-helix family member e40 [Source:HGNC Symbol;Acc:HGNC:1046]
POLK	polymerase (DNA) kappa [Source:HGNC Symbol;Acc:HGNC:9183]
ZBTB7A	zinc finger and BTB domain containing 7A [Source:HGNC Symbol;Acc:HGNC:18078]
NCOR1	nuclear receptor corepressor 1 [Source:HGNC Symbol;Acc:HGNC:7672]
CTSK	cathepsin K [Source:HGNC Symbol;Acc:HGNC:2536]
ARID4B	AT-rich interaction domain 4B [Source:HGNC Symbol;Acc:HGNC:15550]
GSK3B	glycogen synthase kinase 3 beta [Source:HGNC Symbol;Acc:HGNC:4617]
STYK1	serine/threonine/tyrosine kinase 1 [Source:HGNC Symbol;Acc:HGNC:18889]
AKT3	AKT serine/threonine kinase 3 [Source:HGNC Symbol;Acc:HGNC:393]
CTNNB1	catenin beta 1 [Source:HGNC Symbol;Acc:HGNC:2514]
CTNND2	catenin delta 2 [Source:HGNC Symbol;Acc:HGNC:2516]
RUNX1	runt related transcription factor 1 [Source:HGNC Symbol;Acc:HGNC:10471]
IL2	interleukin 2 [Source:HGNC Symbol;Acc:HGNC:6001]
PSMC3	proteasome 26S subunit, ATPase 3 [Source:HGNC Symbol;Acc:HGNC:9549]
STKLD1	serine/threonine kinase-like domain containing 1 [Source:HGNC Symbol;Acc:HGNC:28669]
HSPA8	heat shock protein family A (Hsp70) member 8 [Source:HGNC Symbol;Acc:HGNC:5241]
CHI3L1	chitinase 3 like 1 [Source:HGNC Symbol;Acc:HGNC:1932]
MAPK3	mitogen-activated protein kinase 3 [Source:HGNC Symbol;Acc:HGNC:6877]
DUSP6	dual specificity phosphatase 6 [Source:HGNC Symbol;Acc:HGNC:3072]
PML	promyelocytic leukemia [Source:HGNC Symbol;Acc:HGNC:9113]
TERT	telomerase reverse transcriptase [Source:HGNC Symbol;Acc:HGNC:11730]
DYRK2	dual specificity tyrosine phosphorylation regulated kinase 2 [Source:HGNC Symbol;Acc:HGNC:3093]
DAXX	death-domain associated protein [Source:HGNC Symbol;Acc:HGNC:2681]
MDM4	MDM4, p53 regulator [Source:HGNC Symbol;Acc:HGNC:6974]
MKLN1	muskelin 1 [Source:HGNC Symbol;Acc:HGNC:7109]
GDNF	glial cell derived neurotrophic factor [Source:HGNC Symbol;Acc:HGNC:4232]
HSP90AA1	heat shock protein 90kDa alpha family class A member 1 [Source:HGNC Symbol;Acc:HGNC:5253]
INSRR	insulin receptor related receptor [Source:HGNC Symbol;Acc:HGNC:6093]
SMAD2	SMAD family member 2 [Source:HGNC Symbol;Acc:HGNC:6768]
EPHB6	EPH receptor B6 [Source:HGNC Symbol;Acc:HGNC:3396]
MMP2	matrix metallopeptidase 2 [Source:HGNC Symbol;Acc:HGNC:7166]
MMP9	matrix metallopeptidase 9 [Source:HGNC Symbol;Acc:HGNC:7176]
CXCL8	C-X-C motif chemokine ligand 8 [Source:HGNC Symbol;Acc:HGNC:6025]
FN1	fibronectin 1 [Source:HGNC Symbol;Acc:HGNC:3778]
TGM2	transglutaminase 2 [Source:HGNC Symbol;Acc:HGNC:11778]
TRIB3	tribbles pseudokinase 3 [Source:HGNC Symbol;Acc:HGNC:16228]
LTBP4	latent transforming growth factor beta binding protein 4 [Source:HGNC Symbol;Acc:HGNC:6717]
DIAPH3	diaphanous related formin 3 [Source:HGNC Symbol;Acc:HGNC:15480]
BCHE	butyrylcholinesterase [Source:HGNC Symbol;Acc:HGNC:983]
SUZ12	SUZ12 polycomb repressive complex 2 subunit [Source:HGNC Symbol;Acc:HGNC:17101]
MTOR	mechanistic target of rapamycin [Source:HGNC Symbol;Acc:HGNC:3942]
PTEN	phosphatase and tensin homolog [Source:HGNC Symbol;Acc:HGNC:9588]
NDRG1	N-myc downstream regulated 1 [Source:HGNC Symbol;Acc:HGNC:7679]
WT1	Wilms tumor 1 [Source:HGNC Symbol;Acc:HGNC:12796]
CSTB	cystatin B [Source:HGNC Symbol;Acc:HGNC:2482]
TRIM33	tripartite motif containing 33 [Source:HGNC Symbol;Acc:HGNC:16290]
SRPK2	SRSF protein kinase 2 [Source:HGNC Symbol;Acc:HGNC:11306]
BMI1	BMI1 proto-oncogene, polycomb ring finger [Source:HGNC Symbol;Acc:HGNC:1066]
ATRX	ATRX, chromatin remodeler [Source:HGNC Symbol;Acc:HGNC:886]
ERN1	endoplasmic reticulum to nucleus signaling 1 [Source:HGNC Symbol;Acc:HGNC:3449]
MAPKAPK3	mitogen-activated protein kinase-activated protein kinase 3 [Source:HGNC Symbol;Acc:HGNC:6888]
CDC42EP4	CDC42 effector protein 4 [Source:HGNC Symbol;Acc:HGNC:17147]
