# Supplementary material for: Integrating Multi-Omics Analysis for Enhanced Diagnosis and Treatment of Glioblastoma: A Comprehensive Data-Driven Approach
Source: Preprints.org preprint supplement (doi:10.20944/preprints202303.0355.v1), 2023-03-20
Supplement: Supplementary file 3 [file Supplementary Table 10.xlsx]

## Sheet: Sheet1
Degree unDir	gene name	Betweenness unDir	gene name	Bridging unDir	gene name	Centroid unDir	gene name	Closeness unDir	gene name	EigenVector unDir	gene name
351	UBC	4491.74	UBC	265.714	KCNK18	369	LUZP6	0.00227273	UBC	0.148376	UBC
307	HDAC1	1226.01	DAB1	100.256	TDRP	-369	KCNK18	0.00176678	TRIM28	0.0971342	CSNK2A1
302	TP53	1197.28	TRIM28	19.7465	COPRS	-369	TDRP	0.00174825	CSNK2A1	0.0971161	HDAC1
271	CTNNB1	1084.22	APP	14.2725	CLDN10	-369	COPRS	0.0017452	CTNNB1	0.0950412	TRIM28
262	RBBP4	1054.43	PINK1	13.9193	XRRA1	-369	CLDN10	0.0017452	HDAC1	0.0940331	CTNNB1
258	CSNK2A1	992.868	RNF2	13.1776	IL27	-369	XRRA1	0.00172117	XPO1	0.0933245	XPO1
253	RB1	889.934	JUN	10.9933	DRD5	-369	IL27	0.00172117	TP53	0.0922523	HDAC2
251	HDAC2	881.699	TP53	10.9745	COX6B2	-369	DRD5	0.00171527	HDAC2	0.0921883	RBBP4
245	JUN	862.961	STAT3	9.02659	IL2	-369	COX6B2	0.0017094	MYC	0.0903392	TP53
244	PCNA	844.313	DRD5	8.40512	LZTR1	-369	IL2	0.0017094	RBBP4	0.0870927	MYC
243	EP300	837.682	CELF2	7.83958	PLK5	-369	LZTR1	0.00170648	JUN	0.0867161	KDM1A
242	TRIM28	825.011	RB1	7.23173	KMT5C	-369	PLK5	0.00170358	SMARCA2	0.0865246	PCNA
241	MYC	820.317	NTRK2	6.89177	CMTM1	-369	KMT5C	0.00169492	KDM1A	0.0838807	RB1
240	CDK2	805.646	CTNNB1	6.84028	XPC	-369	CMTM1	0.00169205	RB1	0.0837833	PARP1
236	XPO1	792.442	SMARCA2	6.76545	RAD51B	-369	XPC	0.00168634	CELF2	0.0833536	SMARCA2
225	CDK1	786.741	MYC	6.64803	CBX8	-369	RAD51B	0.0016835	FN1	0.0829344	EP300
222	MCM3	786.2	HDAC1	6.34121	PINK1	-369	CBX8	0.00167504	PARP1	0.0825422	SET
220	CREBBP	784.29	CSNK2A1	6.19041	GSTT1	-369	PINK1	0.00167224	EP300	0.0819111	JUN
217	CDK4	771.012	CAST	5.89229	DAB1	-369	GSTT1	0.00166945	SMARCC1	0.0805875	MCM3
216	SMARCA2	759.291	HIST1H4A	5.85156	UGT8	-369	DAB1	0.00166667	PCNA	0.0801849	SMARCC1
210	MCM7	752.856	XPO1	5.36861	DNAH1	-369	UGT8	0.00166389	TCF4	0.0800565	FN1
210	RELA	720.919	MUC1	5.3522	STYK1	-369	DNAH1	0.00166389	PIK3R1	0.0798605	SMARCA4
206	MCM6	711.755	PIK3R1	5.31176	UGT2B15	-369	STYK1	0.00166113	APP	0.0798063	MCM4
204	CDKN1A	697.161	RAD51B	4.70814	UGT2B17	-369	UGT2B15	0.00166113	AUTS2	0.0796228	ESR1
204	BRCA1	687.111	FN1	4.58809	STKLD1	-369	UGT2B17	0.00166113	MDM2	0.0793597	MDM2
202	EZH2	685.154	TCF4	4.52926	SPSB4	-369	STKLD1	0.00166113	ESR1	0.0792529	CDK1
202	MDM2	675.803	NFIB	4.46473	CBX4	-369	SPSB4	0.00166113	RELA	0.078315	DNMT1
201	MCM2	675.024	KDM1A	4.45112	DEFA5	-369	CBX4	0.00165837	CAST	0.0782341	EZH2
200	KDM1A	669.562	HDAC2	4.44761	ANP32A	-369	DEFA5	0.00165837	MCM4	0.0778907	XRCC5
200	HSP90AA1	653.088	LZTR1	4.39216	ADCY6	-369	ANP32A	0.00165837	HSP90AA1	0.0778764	HSP90AA1
199	CDC6	651.799	RBBP4	4.25598	ITPKC	-369	ADCY6	0.00165563	APC	0.0776332	CDK4
197	ESR1	651.181	PRKCQ	4.23907	EPHB6	-369	ITPKC	0.00165563	SET	0.0771912	CDK2
194	SMARCA4	641.955	APC	4.22058	UGT1A8	-369	EPHB6	0.00165289	MAP3K7	0.076809	MAP3K7
194	MCM4	638.41	MDM2	4.20369	TRIB3	-369	UGT1A8	0.00164474	HIST1H4A	0.076441	BRCA1
193	DNMT1	633.916	AUTS2	4.09912	HIST1H3E	-369	TRIB3	0.00164474	SMARCA4	0.0762917	TFDP1
191	SMARCC1	633.427	GSK3A	4.09714	CDC42EP4	-369	HIST1H3E	0.00164474	CDK4	0.0760178	CELF2
190	CCNA2	630.399	KCNIP4	3.93046	CDC42BPG	-369	CDC42EP4	0.00164204	KCNIP4	0.0757515	RELA
190	PIK3R1	625.354	IL2	3.91447	TONSL	-369	CDC42BPG	0.00164204	XRCC5	0.0749673	DEK
187	FN1	622.717	DAPK1	3.8842	EDAR	-369	TONSL	0.00164204	MCM3	0.0746375	CBX5
186	KAT2B	607.957	RELA	3.8513	RING1	-369	EDAR	0.00164204	CDK2	0.0745459	TCF4
186	AKT1	604.373	SMARCC1	3.8373	L3MBTL1	-369	RING1	0.00164204	CDK1	0.0745277	SMARCA5
185	STAT3	591.358	HSP90AA1	3.82274	SMIM10L2A	-369	L3MBTL1	0.00163934	MUC1	0.0744493	MCM2
185	NFKB1	589.72	FOXP1	3.79107	PDK2	-369	SMIM10L2A	0.00163934	CBX5	0.0744337	MCM6
185	CCNB1	584.636	CLDN10	3.67835	APP	-369	PDK2	0.00163934	CDKN1A	0.0740037	TUBA1A
184	EGFR	583.002	EGFR	3.65537	INSRR	-369	APP	0.00163934	EZH2	0.0739715	AUTS2
184	RFC4	582.478	ESR1	3.59197	ZBTB7A	-369	INSRR	0.00163666	NFIB	0.0736706	CDKN1A
183	TCF4	579.963	NFIA	3.58512	PROM1	-369	ZBTB7A	0.00163666	DNMT1	0.0734822	NCL
182	CELF2	569.268	KCNK18	3.57036	GSK3A	-369	PROM1	0.00163399	PRKCQ	0.0732061	RFC4
182	PARP1	566.055	EP300	3.56715	GUCY2F	-369	GSK3A	0.00163399	FOXP1	0.0727666	CAST
182	SET	565.382	CBX4	3.50367	PARP10	-369	GUCY2F	0.00163132	MCM6	0.0725504	LBR
181	TFDP1	565.18	PARP1	3.47429	FAT1	-369	PARP10	0.00162866	SMARCA5	0.0725187	APP
178	XRCC5	565.165	PRL	3.45436	ATP12A	-369	FAT1	0.00162866	KAT2B	0.0723986	PIK3R1
178	TOP2A	557.017	DNMT1	3.44657	RPL41	-369	ATP12A	0.00162866	TFDP1	0.0721217	APC
175	AR	554.82	MCM4	3.42319	IFNA2	-369	RPL41	0.00162602	DAPK1	0.0712668	CREBBP
174	APC	552.53	KAT2B	3.41448	SHANK2	-369	IFNA2	0.00162338	EGFR	0.0711523	XRCC6
173	SMARCA5	550.053	CBX5	3.36943	UBC	-369	SHANK2	0.00162075	TUBA1A	0.0707325	CCNB1
173	MAP3K7	544.081	CDKN1A	3.35154	PPARG	-369	UBC	0.00162075	TRIM24	0.0703656	TRIM24
173	CBX5	542.466	PCNA	3.35122	CSTA	-369	PPARG	0.00162075	DEK	0.0703462	SSRP1
170	MCM5	541.18	MAP3K7	3.34117	HIST1H4A	-369	CSTA	0.00161812	NTRK2	0.0699562	KAT2B
168	CBX3	531.482	SETBP1	3.33706	NSD1	-369	HIST1H4A	0.00161812	SETBP1	0.0698866	CBX3
168	APP	530.688	NFKB1	3.33396	NTRK2	-369	NSD1	0.00161812	NFKB1	0.069242	CBX1
167	CDK6	525.638	PPARG	3.32654	PRL	-369	NTRK2	0.00161812	AKT1	0.0691133	CDC6
167	RBBP7	516.884	RDX	3.32344	MMS22L	-369	PRL	0.00161551	CREBBP	0.0690829	AKT1
167	SUPT16H	501.555	SET	3.30888	SFMBT1	-369	MMS22L	0.0016129	XRCC6	0.0688837	FOXP1
162	TRIM24	500.479	BHLHE40	3.26498	ENO2	-369	SFMBT1	0.0016129	MCM2	0.0686293	YWHAZ
161	DEK	498.236	PPP3CA	3.25851	UBAP1L	-369	ENO2	0.00161031	CDC6	0.0686094	PRKDC
160	MAPK3	497.794	RING1	3.25015	NDRG1	-369	UBAP1L	0.00160772	RDX	0.0685797	KCNIP4
159	SSRP1	495.444	AKT1	3.23626	FOSL2	-369	NDRG1	0.00160772	PPP3CA	0.068245	TOP2A
159	CBX1	487.063	KAT5	3.23288	TCF7L1	-369	FOSL2	0.00160772	SSRP1	0.0679181	MCM7
159	HDAC3	485.982	CDK2	3.18295	TMSB4X	-369	TCF7L1	0.00160772	CBX1	0.0678997	MUC1
159	CAST	481.503	SMARCA5	3.17557	KCNIP4	-369	TMSB4X	0.00160772	BRCA1	0.0678284	PRMT1
158	RNF2	476.207	CLIC1	3.15082	PHF8	-369	KCNIP4	0.00160514	RNF2	0.0677537	WHSC1
157	DAPK1	473.364	ANP32A	3.1417	HDAC8	-369	PHF8	0.00160514	BHLHE40	0.0677062	HIST1H4A
157	NCL	471.918	MCM6	3.1401	TERT	-369	HDAC8	0.00160514	NCL	0.0676738	CCNA2
154	NFIB	466.602	CBX8	3.1399	NFIA	-369	TERT	0.00160256	RBFOX1	0.0675554	NFIB
154	AUTS2	463.938	CDK4	3.13641	CTSK	-369	NFIA	0.00160256	LBR	0.0669839	NFKB1
154	CHUK	453.716	TRIM24	3.13286	RNF2	-369	CTSK	0.0016	MCM7	0.0669834	SUPT16H
153	RBL1	443.977	KAT2A	3.11067	BCHE	-369	RNF2	0.0016	RFC4	0.0666767	HDGF
153	YWHAZ	443.624	CREBBP	3.10234	DNMT3A	-369	BCHE	0.00159744	NFIA	0.0664389	PRKCQ
152	SMAD2	441.752	SMARCA4	3.09335	KAT6A	-369	DNMT3A	0.00159744	RBBP7	0.0661121	UBE2I
152	EED	438.924	RBBP7	3.08615	HSPA4	-369	KAT6A	0.00159744	YWHAZ	0.0659717	RBBP7
152	BAZ1B	437.332	CDC6	3.08353	IDH2	-369	HSPA4	0.00159744	CBX3	0.0657792	CDK6
151	MUC1	436.857	XRCC5	3.07889	CLIC1	-369	IDH2	0.0015949	KAT5	0.0656223	EGFR
151	PRKCQ	435.561	PLXDC2	3.06266	TES	-369	CLIC1	0.0015949	MAPKAPK3	0.0646891	CHUK
150	CHD4	430.312	CDH13	3.05454	MSL3	-369	TES	0.00158983	STAT3	0.0645684	RNF2
150	ORC2	429.095	TFDP1	3.02776	MUC1	-369	MSL3	0.0015873	PRL	0.0645038	DAPK1
150	PRKDC	426.193	MCM7	3.02771	BMP4	-369	MUC1	0.0015873	PRMT1	0.0644886	SETBP1
150	UBE2I	421.096	COPRS	2.99692	BMI1	-369	BMP4	0.0015873	CCNB1	0.0643568	BAZ1B
150	TUBA1A	420.489	CDH3	2.99602	GABARAPL2	-369	BMI1	0.00158479	HDGF	0.0642868	SMAD2
149	KMT2A	417.789	SSRP1	2.985	PLD2	-369	GABARAPL2	0.00158479	WHSC1	0.0642596	RBFOX1
148	KAT5	415.341	EZH2	2.98097	PLXDC2	-369	PLD2	0.00158479	MAPK3	0.0642509	MAPKAPK3
148	GSK3B	415.184	DYRK1A	2.93455	LTBP4	-369	PLXDC2	0.00158479	CDK6	0.0636177	PPP3CA
148	FOXP1	414.998	TUBA1A	2.93099	CBX6	-369	LTBP4	0.00158228	CLIC1	0.0635271	H2AFX
147	H2AFX	414.078	LBR	2.91773	DYRK1A	-369	CBX6	0.00158228	PLXDC2	0.0634372	ORC2
146	PRMT1	413.898	RUNX1	2.91749	CAST	-369	DYRK1A	0.00158228	CDH13	0.0632834	HSP90AB1
145	KAT2A	413.115	MCM3	2.91524	PLA2G2D	-369	CAST	0.00158228	EED	0.0632462	MCM5
145	XRCC6	412.657	CDK1	2.89902	CBX7	-369	PLA2G2D	0.00157978	RUNX1	0.0632113	NPM1
144	HSP90AB1	411.225	MCM2	2.88354	ERCC6	-369	CBX7	0.00157978	BAZ1B	0.0631585	RDX
144	NTRK2	407.634	CTSK	2.87396	UVRAG	-369	ERCC6	0.00157978	SUPT16H	0.0626068	TOP2B
143	CHD3	404.542	CHD4	2.86786	PRKCQ	-369	UVRAG	0.00157978	TOP2A	0.0623016	ILF3
143	HIST1H4A	402.283	DEK	2.85765	SIRT2	-369	PRKCQ	0.00157729	DYRK1A	0.0619995	RUNX1
142	SETBP1	400.885	RBPJ	2.85674	DIAPH3	-369	SIRT2	0.00157729	KMT2A	0.0616555	EED
142	CCND1	399.363	KMT2A	2.84958	RDX	-369	DIAPH3	0.00157729	UBE2I	0.0615608	BHLHE40
142	RUNX1	398.095	XRCC6	2.84937	CBX2	-369	RDX	0.00157729	CHUK	0.0614665	HDAC3
141	BHLHE40	396.48	CHD3	2.84911	TNFSF10	-369	CBX2	0.00157729	AR	0.0611118	STAT3
140	KCNIP4	388.882	RBFOX1	2.84167	AUTS2	-369	TNFSF10	0.0015748	GSK3A	0.061018	KAT5
140	MAPK8	388.581	MAPKAPK3	2.84102	MYOD1	-369	AUTS2	0.0015748	KAT2A	0.060863	MAPK3
140	PTK2	387.098	UVRAG	2.82586	RAG1	-369	MYOD1	0.0015748	CHD4	0.0606803	ATAD2
140	LBR	378.337	IQGAP2	2.82154	STAG2	-369	RAG1	0.0015748	HDAC3	0.0604139	AR
140	PPP3CA	369.907	PIM1	2.81434	HOXA9	-369	STAG2	0.00157233	ILF3	0.0603509	CHAF1A
140	SUZ12	369.655	CBX1	2.79812	NFIB	-369	HOXA9	0.00157233	CHD3	0.0602528	CLIC1
140	CDKN1B	363.087	PRMT1	2.79431	CDH3	-369	NFIB	0.00157233	SETDB1	0.0601723	YWHAE
140	MAPKAPK3	350.885	MAPK3	2.78606	PIM1	-369	CDH3	0.00156986	DAB1	0.0601253	NFIA
139	WHSC1	349.573	NPM1	2.77865	IFNAR1	-369	PIM1	0.00156986	NPM1	0.0600684	CHD4
138	TOP2B	348.588	NSD1	2.77496	TGM2	-369	IFNAR1	0.00156986	HSP90AB1	0.0600498	NTRK2
137	CHAF1A	348.462	PRKCA	2.76943	VEGFA	-369	TGM2	0.00156986	ORC2	0.0597688	KAT2A
137	RDX	345.183	RPS6KA5	2.75861	SETBP1	-369	VEGFA	0.00156986	PRKDC	0.0590674	GSK3B
136	NPM1	342.733	BRCA1	2.73949	PHF20L1	-369	SETBP1	0.00156986	CCNA2	0.0590498	KMT2A
136	RBPJ	342.153	TCF7L1	2.73694	UBB	-369	PHF20L1	0.0015674	IQGAP2	0.0589969	TP53BP1
136	SETDB1	340.204	SETDB1	2.73587	PRKD3	-369	UBB	0.0015674	RBPJ	0.0589236	NASP
134	NFIA	337.416	CDK6	2.72515	FOXP1	-369	PRKD3	0.0015674	TOP2B	0.0586834	SETDB1
134	SUV39H1	335.903	AR	2.72187	MKLN1	-369	FOXP1	0.0015674	MCM5	0.058536	RUVBL2
134	NCOR1	335.419	JAG1	2.72117	CDH13	-369	MKLN1	0.00156495	RPS6KA5	0.0584723	DYRK2
134	PML	334.809	HIST1H3E	2.71859	NF1	-369	CDH13	0.00156495	DYRK2	0.0584249	HAT1
132	CHAF1B	333.42	CBX3	2.71387	EHMT1	-369	NF1	0.00156495	H2AFX	0.0580756	RBPJ
131	HAT1	332.357	ERCC6	2.70081	MEN1	-369	EHMT1	0.0015625	SMAD2	0.0580597	SIRT1
131	YWHAE	332.175	VEGFA	2.69127	MRPL23	-369	MEN1	0.00156006	UVRAG	0.057663	RBL1
131	HDGF	328.705	DYRK2	2.65403	IDH1	-369	MRPL23	0.00156006	MAPK8	0.0574385	PLXDC2
130	GSK3A	327.909	EED	2.65162	MGMT	-369	IDH1	0.00155763	PRKCA	0.0573497	SUZ12
129	RUVBL2	327.826	YWHAZ	2.63278	EGF	-369	MGMT	0.00155763	PIK3CA	0.0572637	CHD3
128	PPARG	327.609	MSL3	2.63064	BHLHE40	-369	EGF	0.00155763	CHAF1A	0.0570966	CCND1
128	PRKCA	327.443	WHSC1	2.62873	IRAK1	-369	BHLHE40	0.00155521	SIRT1	0.0570857	CDH13
128	DYRK2	323.296	PIK3CA	2.62763	RBFOX1	-369	IRAK1	0.00155521	GSK3B	0.0568888	GSK3A
128	HIF1A	322.589	HSPA4	2.62711	STAT3	-369	RBFOX1	0.0015528	MTOR	0.056659	DYRK1A
127	ILF3	322.096	TOP2A	2.62053	LMNA	-369	STAT3	0.0015528	TP53BP1	0.056533	HIF1A
127	RBFOX1	321	CDKN1B	2.61883	MET	-369	LMNA	0.0015528	YWHAE	0.0562399	MAPK8
126	CDH13	319.48	HDAC3	2.6123	IQGAP2	-369	MET	0.00155039	PIM1	0.0561032	PRL
126	SIRT1	318.653	CHUK	2.60408	ERN1	-369	IQGAP2	0.00155039	SUV39H1	0.0559736	CHAF1B
125	CLIC1	315.848	HES1	2.59733	ERBB2	-369	ERN1	0.00155039	PTK2	0.0559316	UHRF2
124	DAXX	315.02	MAPK8	2.59071	PPP3CA	-369	ERBB2	0.00154799	PINK1	0.0554116	IQGAP2
124	PRL	314.812	SUPT16H	2.5876	PHF20	-369	PPP3CA	0.00154799	WHSC1L1	0.05527	RPS6KA5
124	CCNE1	314.604	NCL	2.5815	CELF2	-369	PHF20	0.00154799	CHAF1B	0.0552233	SUV39H1
123	JAG1	314.563	BAZ1B	2.57258	CSTB	-369	CELF2	0.0015456	ERCC6	0.0551819	UVRAG
123	PIK3CA	311.774	SUV39H1	2.56978	RPS6KA5	-369	CSTB	0.0015456	VEGFA	0.0550035	PTK2
122	DYRK1A	306.099	WHSC1L1	2.56733	JAG2	-369	RPS6KA5	0.0015456	JAG1	0.054871	WHSC1L1
122	IQGAP2	301.603	MTOR	2.56075	FANCD2	-369	JAG2	0.0015456	CDKN1B	0.0547555	CDKN1B
121	RPS6KA5	301.529	NCOR1	2.55891	MMP9	-369	FANCD2	0.0015456	ATAD2	0.054611	TRIM33
121	DAB1	301.374	HDGF	2.54516	SHPRH	-369	MMP9	0.0015456	HAT1	0.0543669	NCOR1
120	WHSC1L1	300.192	ORC2	2.54069	AKT3	-369	SHPRH	0.0015456	RUVBL2	0.0543471	DAXX
120	PLXDC2	298.255	UBE2I	2.53894	MDM4	-369	AKT3	0.00154321	PPARG	0.0541712	PIK3CA
119	NOTCH1	297.903	NDRG1	2.53566	GDNF	-369	MDM4	0.00154321	UHRF2	0.0537563	CKS1B
118	UVRAG	293.329	MDM4	2.53228	CHI3L1	-369	GDNF	0.00154321	NLK	0.0532541	PRKCA
118	ATAD2	291.914	PTK2	2.53038	DAPK1	-369	CHI3L1	0.00154321	NCOR1	0.0529658	PPARG
118	MTOR	291.303	ILF3	2.52411	GATAD2B	-369	DAPK1	0.00154321	CCND1	0.0527846	MTOR
117	TRIM33	289.423	HSP90AB1	2.52388	KAT14	-369	GATAD2B	0.00154321	SUZ12	0.052471	PML
117	HES1	286.537	KMT5C	2.51721	KAT7	-369	KAT14	0.00154083	NASP	0.0523735	RPS6KA3
117	NLK	282.811	BMP4	2.50926	HDAC6	-369	KAT7	0.00153846	CDH3	0.0521853	ERCC6
117	TP53BP1	280.341	GSK3B	2.50384	ING2	-369	HDAC6	0.00153846	RPS6KA3	0.0521545	HSPA8
116	MTA1	278.682	MET	2.4905	PDGFRA	-369	ING2	0.00153846	PML	0.0520815	PIM1
116	CDH3	278.303	TP53BP1	2.48763	WT1	-369	PDGFRA	0.0015361	TRIM33	0.0520175	VEGFA
116	CDC45	275.144	TOP2B	2.48323	RPE	-369	WT1	0.00153374	MSL3	0.0517961	BAZ1A
114	PIM1	271.531	PLD2	2.47816	PRMT7	-369	RPE	0.00153374	IRAK1	0.0509068	HDAC5
113	VEGFA	271.1	H2AFX	2.46424	MTOR	-369	PRMT7	0.00153374	HES1	0.050873	MGMT
112	MDM4	268.157	NLK	2.45384	LBR	-369	MTOR	0.00153374	HIF1A	0.0505145	NLK
112	HSPA8	267.984	RFC4	2.44778	HPF1	-369	LBR	0.00153374	RBL1	0.0504665	IRAK1
111	RPS6KA3	267.458	SIRT1	2.44274	KDM4A	-369	HPF1	0.00153139	NSD1	0.0504234	DAB1
111	BAZ1A	267.384	TRIM33	2.42705	PRMT5	-369	KDM4A	0.00152905	MDM4	0.0503513	BPTF
111	CENPA	264.81	XPC	2.42373	KMT5A	-369	PRMT5	0.00152672	HSPA4	0.0503072	HSPA4
110	UHRF2	261.218	SMAD2	2.42241	PSMC3	-369	KMT5A	0.00152439	CTSK	0.0497913	HES1
110	BPTF	259.358	MCM5	2.41804	PHC1	-369	PSMC3	0.00152439	DAXX	0.0495965	NSD1
110	PINK1	258.59	CCNB1	2.41581	TP53BP1	-369	PHC1	0.00152207	BAZ1A	0.049164	CENPA
109	PRKCB	258.292	RPS6KA3	2.40668	WDR5	-369	TP53BP1	0.00151976	RAD51B	0.0490668	EHMT2
109	ERCC6	257.184	BMI1	2.40398	SRPK2	-369	WDR5	0.00151976	SRPK2	0.0490515	MDM4
108	TAF1	254.971	HAT1	2.40379	NOTCH2	-369	SRPK2	0.00151976	CTNND2	0.0489975	SRPK2
106	NASP	254.603	CCND1	2.39066	KAT5	-369	NOTCH2	0.00151745	NDRG1	0.0488694	JAG1
106	RUVBL1	252.641	CHAF1A	2.38619	NASP	-369	KAT5	0.00151745	EHMT2	0.0488384	CCNE1
105	IRAK1	251.904	YWHAE	2.38085	ARID4A	-369	NASP	0.00151745	BPTF	0.0486264	MSL3
104	HDAC5	250.877	SUZ12	2.37251	BRD4	-369	ARID4A	0.00151515	TCF7L1	0.0486052	RUVBL1
103	MSL3	250.388	PML	2.36968	RPS6KA3	-369	BRD4	0.00151515	BMP4	0.0485466	STAG2
103	CTSK	249.988	IRAK1	2.3655	ARID4B	-369	RPS6KA3	0.00151515	STAG2	0.047719	MTA1
103	CKS1B	249.361	CCNA2	2.36266	L3MBTL2	-369	ARID4B	0.00151515	MGMT	0.0476951	ANP32A
103	MET	246.849	PRKCB	2.35905	RBPJ	-369	L3MBTL2	0.00151515	KAT7	0.0476389	PINK1
103	HSPA4	246.73	EGF	2.33878	RUNX1	-369	RBPJ	0.00151515	CENPA	0.0476127	PBRM1
102	ANP32A	246.18	GSTT1	2.33316	MECP2	-369	RUNX1	0.00151515	NOTCH1	0.0470627	MEN1
102	SRPK2	245.421	UHRF2	2.32934	PKM	-369	MECP2	0.00151286	MET	0.0470503	PSMC3
102	MTA2	243.92	TERT	2.32296	CTNND2	-369	PKM	0.00151286	HDAC5	0.0463834	NOTCH1
101	BRPF1	237.062	TAF1	2.32282	HIRA	-369	CTNND2	0.00151286	MTA1	0.0462592	CDH3
101	EHMT2	236.742	ATP12A	2.32254	TAF1	-369	HIRA	0.0015083	PLD2	0.0459038	TAF1
101	CTNND2	233.912	NOTCH1	2.31814	HES1	-369	TAF1	0.0015083	PSMC3	0.0457149	PRMT5
101	ATRX	233.624	BAZ1A	2.31014	APC	-369	HES1	0.0015083	BRPF1	0.0456363	SHPRH
98	CBX4	230.218	CHAF1B	2.30331	PRKCA	-369	APC	0.0015083	PBRM1	0.045629	KAT7
98	PSMC3	227.805	CTNND2	2.3015	HEY1	-369	PRKCA	0.0015083	HSPA8	0.0455583	MTA2
98	TCF7L1	223.226	STAG2	2.30062	NPM1	-369	HEY1	0.00150602	SHPRH	0.0450359	TCF7L1
98	NSD1	218.176	EPHB6	2.30055	MAPKAPK3	-369	NPM1	0.00150602	PRKCB	0.0448548	NDRG1
97	FOXO3	217.537	SRPK2	2.29512	XRCC6	-369	MAPKAPK3	0.00150376	CBX4	0.044778	RAD51B
96	TP73	216.608	BPTF	2.29199	WHSC1L1	-369	XRCC6	0.00150376	HIST1H3E	0.0446202	BRPF1
95	KAT7	216.582	NASP	2.28907	UHRF2	-369	WHSC1L1	0.00150376	RING1	0.0445877	PTEN
95	NDRG1	215.448	DAXX	2.28283	PIK3CA	-369	UHRF2	0.00150376	CKS1B	0.0444542	CTNND2
95	RING1	215.184	PSMC3	2.28128	KAT8	-369	PIK3CA	0.0015015	ATP12A	0.0444144	PHF20L1
95	ASF1B	214.91	ATAD2	2.28108	EHMT2	-369	KAT8	0.0015015	MEN1	0.0441439	PRKCB
94	MGMT	210.549	RUVBL2	2.28058	HDAC5	-369	EHMT2	0.0015015	TAF1	0.0438685	CDC45
94	RAD51B	210.238	NOTCH2	2.26368	HDGF	-369	HDAC5	0.0015015	RUVBL1	0.0436531	FOXO3
94	PLD2	207.883	HIF1A	2.26358	DUSP6	-369	HDGF	0.00149925	PHF20L1	0.0435662	CUL4A
94	PBRM1	207.844	HDAC5	2.25342	UQCRH	-369	DUSP6	0.00149925	FMOD	0.0435316	WDR5
93	BMP4	207.729	KAT6A	2.25177	TCF4	-369	UQCRH	0.00149925	MTA2	0.043165	MET
93	FMOD	206.963	BRPF1	2.25074	PRKCB	-369	TCF4	0.00149477	ANP32A	0.0431461	PKM
92	MEN1	206.466	DNMT3A	2.24903	IL1B	-369	PRKCB	0.00149477	FOXO3	0.042651	LMNA
91	STAG2	204.803	PROM1	2.24874	CD9	-369	IL1B	0.00149477	ATRX	0.0424689	TERT
91	EGF	204.789	RBL1	2.24523	TP73	-369	CD9	0.00149477	CDC45	0.0422651	ATRX
91	SHPRH	204.028	IFNAR1	2.24368	TUBA1A	-369	TP73	0.00149477	CCNE1	0.0421768	CCNE2
90	CCNE2	202.064	KAT7	2.24182	FMOD	-369	TUBA1A	0.00149254	IFNAR1	0.0420814	CBX4
90	PTEN	200.506	EHMT2	2.22399	NLK	-369	FMOD	0.00149254	WDR5	0.0419797	PLD2
89	NOTCH2	200.222	TRIB3	2.21853	KAT2A	-369	NLK	0.00149254	PTEN	0.041547	TP73
88	WDR5	198.084	MGMT	2.21313	JAG1	-369	KAT2A	0.00149031	EHMT1	0.0414606	HIRA
87	TERT	196.889	FMOD	2.21174	DYRK2	-369	JAG1	0.00149031	PRMT5	0.0414172	BMP4
87	PRMT5	196.784	PRKDC	2.21146	CTSB	-369	DYRK2	0.00148588	TERT	0.041047	ASF1B
87	EHMT1	196.575	SHPRH	2.20849	TAF1B	-369	CTSB	0.00148588	UBB	0.040967	DNMT3A
86	RUNX3	192.507	MEN1	2.20821	ILF3	-369	TAF1B	0.00148588	PDGFRA	0.0409164	HIST1H3E
86	ARID4A	189.748	ERBB2	2.20649	FOXO3	-369	ILF3	0.00148588	PKM	0.0405006	RUNX3
86	HIST1H3E	187.998	EHMT1	2.18285	TRIM33	-369	FOXO3	0.00148588	TP73	0.0404499	UBB
85	PKM	185.254	ADCY6	2.17579	TRIM28	-369	TRIM33	0.00148368	EGF	0.0404411	EHMT1
85	ERBB2	183.619	MTA1	2.17231	TWIST1	-369	TRIM28	0.00148368	AKT3	0.0403484	ARID4A
85	IFNAR1	183.573	TP73	2.14605	CHD3	-369	TWIST1	0.00148368	HDAC6	0.0402139	ASF1A
85	PHF20L1	182.111	CSTA	2.14531	SETD7	-369	CHD3	0.00148368	NOTCH2	0.0398651	ATP12A
85	BMI1	181.383	ATRX	2.13935	PIK3R1	-369	SETD7	0.00148148	KAT6A	0.0398043	IFNAR1
84	ASF1A	180.416	CENPA	2.13678	MAP3K7	-369	PIK3R1	0.00148148	LMNA	0.039753	CTSK
83	CUL4A	177.817	PHF20L1	2.12806	BRPF1	-369	MAP3K7	0.00148148	ARID4A	0.0391155	ING2
83	PDGFRA	177.666	ENO2	2.12355	CBX5	-369	BRPF1	0.00147929	CUL4A	0.0390136	RACK1
83	AKT3	175.173	FOXO3	2.10735	PARP1	-369	CBX5	0.0014771	SIRT2	0.0388258	PDGFRA
82	ATP12A	169.965	MTA2	2.10559	FN1	-369	PARP1	0.00147493	DRD5	0.038799	KAT6A
82	RACK1	168.043	MYOD1	2.10396	POLK	-369	FN1	0.00147493	MMS22L	0.0387856	KDM4A
82	UBB	166.265	EDAR	2.10031	PBRM1	-369	POLK	0.00147493	DNMT3A	0.0387601	FMOD
82	LMNA	165.629	TDRP	2.09962	RUNX3	-369	PBRM1	0.00147493	CD9	0.0386469	HDAC6
81	HDAC6	164.885	WDR5	2.09429	RAC1	-369	RUNX3	0.00147493	ASF1B	0.0381317	MMS22L
81	DNMT3A	164.348	PDGFRA	2.08561	BAZ1A	-369	RAC1	0.00147275	PROM1	0.0379618	AKT3
80	KAT6A	163.271	AKT3	2.08495	ZFP57	-369	BAZ1A	0.00147275	ERBB2	0.0379554	RING1
80	HIRA	161.884	BCHE	2.08492	SIK1	-369	ZFP57	0.00147275	RUNX3	0.0372034	BMI1
80	DUSP6	161.208	CBX7	2.08249	WHSC1	-369	SIK1	0.00147059	ENO2	0.0371626	TAF15
80	RAC1	160.765	MMS22L	2.07772	PELP1	-369	WHSC1	0.00147059	BMI1	0.0371288	BRD7
80	GATAD2A	160.589	UBB	2.06336	PTEN	-369	PELP1	0.00147059	ING2	0.0369223	CD9
78	KDM4A	159.903	ARID4A	2.06112	TAF15	-369	PTEN	0.00147059	CCNE2	0.036858	SIK1
76	BRD4	158.602	PRMT5	2.0513	SETDB1	-369	TAF15	0.00146843	EPHB6	0.0366774	SIRT2
76	SIRT2	153.922	PBRM1	2.04835	HSPB8	-369	SETDB1	0.00146843	HDAC8	0.0365383	HDAC8
74	MYOD1	152.498	SIRT2	2.04589	SIRT1	-369	HSPB8	0.00146843	KDM4A	0.0364227	MKLN1
74	PROM1	147.926	LMNA	2.03996	BRD7	-369	SIRT1	0.00146843	HIRA	0.0361305	RPE
74	CTSB	145.567	CDC45	2.03623	TAF1L	-369	BRD7	0.00146843	DUSP6	0.0358002	ARID4B
74	CD9	143.719	HDAC8	2.02026	ATRX	-369	TAF1L	0.00146843	RACK1	0.0355209	BRD4
74	ENO2	143.644	HSPA8	2.00967	CHD4	-369	ATRX	0.00146413	BRD4	0.0354976	DRD5
74	DRD5	142.413	HDAC6	2.00802	KDM1A	-369	CHD4	0.00146199	BCHE	0.0352	DUSP6
74	CDK3	141.802	DUSP6	2.00095	TRIM24	-369	KDM1A	0.00146199	MKLN1	0.0351633	NOTCH2
73	ING2	133.558	KDM4A	1.9981	BPTF	-369	TRIM24	0.00146199	ARID4B	0.035098	GATAD2A
73	MMS22L	132.759	TNFSF10	1.99011	SUV39H1	-369	BPTF	0.00146199	SIK1	0.0347521	ENO2
72	ARID4B	132.153	PKM	1.98424	SMARCA2	-369	SUV39H1	0.00145985	CBX7	0.0342266	EGF
72	TAF15	132.113	SHANK2	1.9772	SMARCC1	-369	SMARCA2	0.00145985	NF1	0.0339025	CDK3
72	SIK1	131.853	CBX6	1.9757	CXCL8	-369	SMARCC1	0.00145773	PHF8	0.0336344	PROM1
71	MKLN1	131.408	PTEN	1.97352	CDKN1B	-369	CXCL8	0.00145773	TES	0.0336221	RAC1
71	CBX7	130.919	ASF1B	1.96669	ATAD2	-369	CDKN1B	0.00145773	CTSB	0.0332521	UHRF1
71	HDAC8	128.708	MKLN1	1.96557	SMARCA5	-369	ATAD2	0.0014556	IL2	0.0331238	SETD7
70	BRD2	126.628	RUNX3	1.9651	IPO4	-369	SMARCA5	0.0014556	LZTR1	0.0329863	TAF1B
70	NF1	126.093	ITPKC	1.95721	IL31	-369	IPO4	0.0014556	ADCY6	0.0329787	BRD2
70	BCHE	125.135	CKS1B	1.95645	CUL4A	-369	IL31	0.0014556	KAT14	0.0329155	NF1
70	BRD7	122.941	BRD4	1.94795	SSRP1	-369	CUL4A	0.0014556	TAF15	0.0328991	NOC2L
69	RPE	122.603	PHF8	1.9427	NOTCH3	-369	SSRP1	0.0014556	BRD7	0.0327217	KAT14
68	TWIST1	122.286	CTSB	1.93732	SET	-369	NOTCH3	0.0014556	ASF1A	0.0326574	ERBB2
66	TAF1B	122.126	RAC1	1.93565	MAPK8	-369	SET	0.00145349	CBX6	0.0325749	CTSB
66	TRIB3	121.893	NF1	1.93536	MTA2	-369	MAPK8	0.00145349	RPE	0.0317516	KMT5A
65	EPHB6	121.584	CDC42EP4	1.9319	PRMT1	-369	MTA2	0.00145349	CDK3	0.031285	TRIB3
65	GATAD2B	121.312	HIRA	1.91769	DEK	-369	PRMT1	0.00145138	EDAR	0.0311831	TWIST1
64	CBX6	121.071	ING2	1.90321	KMT2A	-369	DEK	0.00145138	MYOD1	0.0310712	IDH2
64	CSTA	116.88	TES	1.89995	NOC2L	-369	KMT2A	0.00144928	SHANK2	0.0308361	MECP2
64	KAT14	116.813	RUVBL1	1.89379	MMP2	-369	NOC2L	0.00144928	RAC1	0.0307509	BCHE
64	SETD7	115.817	MMP9	1.89358	YWHAE	-369	MMP2	0.00144718	SETD7	0.0307409	IPO4
63	IL2	114.675	IDH2	1.88656	RACK1	-369	YWHAE	0.00144718	GATAD2A	0.0305913	DIAPH3
63	KAT8	114.136	CD9	1.87405	NCOR1	-369	RACK1	0.00144509	TRIB3	0.0305777	TES
63	PRKD3	110.306	UGT8	1.8648	RECK	-369	NCOR1	0.00144509	CSTA	0.0298243	PHF8
63	CXCL8	110.192	ARID4B	1.82767	RBBP7	-369	RECK	0.00144509	IDH2	0.0296546	FANCD2
63	IDH1	110.178	CCNE1	1.82055	MCM4	-369	RBBP7	0.00144509	IDH1	0.0296359	PRKD3
63	KMT5A	109.691	L3MBTL1	1.81464	MDM2	-369	MCM4	0.00144509	KMT5A	0.0294905	LZTR1
62	TES	108.153	FOSL2	1.8126	CENPA	-369	MDM2	0.00144509	TAF1B	0.0294232	MYOD1
62	LZTR1	108.028	GATAD2B	1.80783	ESR1	-369	CENPA	0.001443	NOC2L	0.0293899	CBX7
62	NOTCH3	107.238	CUL4A	1.80578	YWHAZ	-369	ESR1	0.001443	BRD2	0.0293457	EPHB6
62	IDH2	103.45	RPE	1.79306	TOP2B	-369	YWHAZ	0.00144092	DIAPH3	0.0292351	CBX6
62	TNFSF10	103.195	TMSB4X	1.77779	XRCC5	-369	TOP2B	0.00144092	MECP2	0.0290948	IL2
62	CBX8	102.05	RACK1	1.77568	NOTCH1	-369	XRCC5	0.00143885	CBX8	0.0288068	IDH1
62	FANCD2	101.875	CCNE2	1.77187	CBX1	-369	NOTCH1	0.00143885	PRKD3	0.0287743	ADCY6
62	PHF8	100.249	STKLD1	1.77115	BRD2	-369	CBX1	0.00143885	FANCD2	0.0283365	SHANK2
61	UHRF1	100.065	IDH1	1.76211	TAF9	-369	BRD2	0.00143885	KAT8	0.0282333	PELP1
61	MMP9	97.7768	PRKD3	1.76065	HAT1	-369	TAF9	0.00143885	TWIST1	0.0282003	GATAD2B
60	ADCY6	96.4585	CBX2	1.75978	PML	-369	HAT1	0.00143678	FOSL2	0.0278431	CSTA
60	DIAPH3	95.4152	KAT8	1.75848	EGFR	-369	PML	0.00143678	TMSB4X	0.0278309	CXCL8
60	EDAR	93.0728	PHC1	1.7583	HSP90AB1	-369	EGFR	0.00143678	TNFSF10	0.0276359	WT1
59	SHANK2	90.698	SIK1	1.75749	KAT2B	-369	HSP90AB1	0.00143678	MMP9	0.0274958	EDAR
59	MECP2	89.4138	KAT14	1.75652	EED	-369	KAT2B	0.00143678	CXCL8	0.0271999	TMSB4X
59	MMP2	88.3327	TAF1B	1.75638	DNMT1	-369	EED	0.00143266	CBX2	0.026134	L3MBTL1
59	PHC1	87.3317	UGT2B15	1.74707	ASF1B	-369	DNMT1	0.00143266	WT1	0.0261291	KAT8
58	CBX2	84.2358	DIAPH3	1.73773	CCNE2	-369	ASF1B	0.00143266	PHC1	0.025957	CBX8
57	NOC2L	83.7843	BRD7	1.72776	MTA1	-369	CCNE2	0.00143266	UHRF1	0.0257135	HOXA9
56	FOSL2	83.7009	FAT1	1.72235	NFKB1	-369	MTA1	0.00143062	CDC42EP4	0.0255714	CBX2
56	PELP1	81.7437	GUCY2F	1.72065	HSP90AA1	-369	NFKB1	0.00143062	L3MBTL1	0.0251246	TAF1A
56	IPO4	81.0448	TWIST1	1.72042	CHAF1B	-369	HSP90AA1	0.00143062	GATAD2B	0.024642	TGM2
56	TMSB4X	80.9697	FANCD2	1.71557	ORC2	-369	CHAF1B	0.00142857	TGM2	0.0245098	KMT5C
55	WT1	80.7723	TAF15	1.71324	DAXX	-369	ORC2	0.00142857	NOTCH3	0.0242774	TNFSF10
54	TGM2	80.0132	KMT5A	1.70587	UBE2I	-369	DAXX	0.00142653	CLDN10	0.024173	POLK
52	HEY1	78.2351	GATAD2A	1.70436	CHUK	-369	UBE2I	0.00142653	KMT5C	0.0239565	ERN1
51	L3MBTL1	77.6647	BRD2	1.69646	CCND1	-369	CHUK	0.00142653	XPC	0.0238585	MMP9
51	ERN1	77.1806	NOTCH3	1.69552	PTK2	-369	CCND1	0.00142653	PELP1	0.0238501	GDNF
50	CDC42EP4	75.6198	SFMBT1	1.68406	CHAF1A	-369	PTK2	0.00142653	IPO4	0.02349	CDC42EP4
50	XPC	75.1506	TGM2	1.66709	TFDP1	-369	CHAF1A	0.0014245	ITPKC	0.0233394	FOSL2
50	ITPKC	75.0408	HEY1	1.66272	HIF1A	-369	TFDP1	0.0014245	GUCY2F	0.0231886	HPF1
50	IL1B	73.7929	UGT2B17	1.66092	NCL	-369	HIF1A	0.0014245	ERN1	0.023016	XPC
50	KMT5C	72.9325	MMP2	1.63933	AKT1	-369	NCL	0.00142248	HOXA9	0.0226592	TAF9
50	TAF9	72.4453	ASF1A	1.63676	MAPK3	-369	AKT1	0.00142045	GABARAPL2	0.0225305	GABARAPL2
50	HOXA9	71.6983	CXCL8	1.63582	XPO1	-369	MAPK3	0.00141844	GSTT1	0.0224578	PHC1
49	GSTT1	70.2231	SETD7	1.63519	BAZ1B	-369	XPO1	0.00141844	FAT1	0.02231	FAT1
49	GDNF	68.515	JAG2	1.62778	EID1	-369	BAZ1B	0.00141844	MMP2	0.022152	GUCY2F
48	FAT1	68.2254	GABARAPL2	1.62756	RELA	-369	EID1	0.00141643	GDNF	0.0220967	NOTCH3
48	GABARAPL2	65.9542	MECP2	1.62499	SUZ12	-369	RELA	0.00141443	HEY1	0.022085	GSTT1
47	CLDN10	65.5824	STYK1	1.62181	CDKN1A	-369	SUZ12	0.00141243	SFMBT1	0.0219025	TAF1L
46	GUCY2F	65.2954	CDK3	1.61021	CKS1B	-369	CDKN1A	0.00141044	POLK	0.0218475	MMP2
46	JAG2	63.5732	ERN1	1.60649	CDK6	-369	CKS1B	0.00140845	RAG1	0.0216553	STKLD1
45	TAF1A	61.7434	WT1	1.59507	GSK3B	-369	CDK6	0.00140845	IL1B	0.0215984	ITPKC
45	SFMBT1	61.5935	ZBTB7A	1.58921	JUN	-369	GSK3B	0.00140647	STKLD1	0.0214448	CFLAR
42	POLK	61.0328	UGT1A8	1.58738	MYC	-369	JUN	0.00140647	RPL41	0.0212188	IL1B
42	CFLAR	59.1595	HOXA9	1.57625	HDAC3	-369	MYC	0.00140647	TAF1A	0.0211091	RAG1
42	STKLD1	57.6602	RPL41	1.5728	CDK3	-369	HDAC3	0.00140252	ZBTB7A	0.0208189	UQCRH
41	ZBTB7A	57.3995	IL1B	1.56712	H2AFX	-369	CDK3	0.00140252	LTBP4	0.0205965	SFMBT1
41	RPL41	55.9099	GDNF	1.55807	HSPA8	-369	H2AFX	0.00140252	JAG2	0.0205435	HSPB8
40	TAF1L	54.8183	TONSL	1.53882	RUVBL2	-369	HSPA8	0.00140252	CFLAR	0.0204305	CLDN10
38	LTBP4	54.6698	LTBP4	1.52152	TAF1A	-369	RUVBL2	0.00140056	MRPL23	0.0203117	RPL41
38	RECK	53.9729	PELP1	1.51823	CSNK2A1	-369	TAF1A	0.00140056	TAF1L	0.0202343	MRPL23
38	MRPL23	50.5239	IPO4	1.50549	RB1	-369	CSNK2A1	0.00140056	TAF9	0.0196327	ZBTB7A
38	HPF1	49.3778	PDK2	1.49433	CBX3	-369	RB1	0.00139665	HPF1	0.0187866	HEY1
38	RAG1	49.1413	NOC2L	1.49134	SMARCA4	-369	CBX3	0.00139665	UQCRH	0.0179469	TONSL
37	TONSL	44.1427	INSRR	1.48492	SMAD2	-369	SMARCA4	0.0013947	COPRS	0.017157	EID1
37	UQCRH	37.6862	UHRF1	1.48338	GATAD2A	-369	SMAD2	0.00139276	TONSL	0.0168368	COPRS
35	PDK2	35.248	MRPL23	1.47222	UHRF1	-369	GATAD2A	0.00139276	HSPB8	0.0159689	L3MBTL2
34	COPRS	34.048	TAF9	1.47014	SUPT16H	-369	UHRF1	0.00138889	PDK2	0.0156455	RECK
33	L3MBTL2	32.9362	RAG1	1.46827	CFLAR	-369	SUPT16H	0.00138889	INSRR	0.0154207	PDK2
33	HSPB8	31.5945	CDC42BPG	1.44162	CDC45	-369	CFLAR	0.00138504	RECK	0.0144558	INSRR
32	CSTB	30.8911	CSTB	1.41174	CDC6	-369	CDC45	0.00138313	L3MBTL2	0.0141402	PRMT7
31	EID1	29.2992	POLK	1.40905	AR	-369	CDC6	0.00137741	CSTB	0.0137622	JAG2
31	INSRR	28.39	IFNA2	1.40157	MCM6	-369	AR	0.00137741	EID1	0.0135365	PARP10
28	UGT2B17	27.5738	TAF1L	1.39117	RUVBL1	-369	MCM6	0.00137363	UGT8	0.0133708	CSTB
27	UGT8	27.5551	HPF1	1.37684	TOP2A	-369	RUVBL1	0.00137174	STYK1	0.0124735	LTBP4
27	STYK1	27.4769	IL27	1.35665	HDAC2	-369	TOP2A	0.00137174	UGT2B17	0.0120207	STYK1
26	UGT2B15	27.0552	UQCRH	1.34223	EZH2	-369	HDAC2	0.00137174	PLA2G2D	0.011582	PHF20
26	IFNA2	26.4403	RECK	1.32429	CTNNB1	-369	EZH2	0.00136986	UGT1A8	0.0114095	PLA2G2D
26	PRMT7	24.1333	TAF1A	1.29458	MCM2	-369	CTNNB1	0.00136799	IFNA2	0.0109842	UGT2B17
25	CHI3L1	22.2994	L3MBTL2	1.29212	ASF1A	-369	MCM2	0.00136799	PRMT7	0.0105492	IFNA2
25	PHF20	21.1738	PARP10	1.27014	PRKDC	-369	ASF1A	0.00136612	PARP10	0.0100093	CDC42BPG
24	PLA2G2D	20.9922	CFLAR	1.24926	CDK4	-369	PRKDC	0.00136426	CDC42BPG	0.00986563	CHI3L1
24	UGT1A8	20.901	XRRA1	1.23174	MCM7	-369	CDK4	0.00136054	UGT2B15	0.00971761	UGT8
23	CDC42BPG	19.4775	COX6B2	1.21639	RBBP4	-369	MCM7	0.00135685	PHF20	0.0094591	UGT1A8
23	PARP10	19.3831	CHI3L1	1.20565	RBL1	-369	RBBP4	0.00135501	CHI3L1	0.00785961	UGT2B15
18	DEFA5	18.4145	DEFA5	1.18457	PCNA	-369	RBL1	0.00134228	DEFA5	0.00764442	DEFA5
10	SPSB4	17.3741	PLA2G2D	1.17037	BRCA1	-369	PCNA	0.001321	SPSB4	0.00409211	SPSB4
7	UGT1A10	17.2665	PHF20	1.15599	EP300	-369	BRCA1	0.00124844	SMIM10L2A	0.00324458	ZFP57
6	ZFP57	16.7542	HSPB8	1.14539	CREBBP	-369	EP300	0.00121803	ZFP57	0.00292433	SMIM10L2A
6	PLK5	16.1236	PLK5	1.13914	TP53	-369	CREBBP	0.0011236	UGT1A10	0.0016228	PLK5
6	SMIM10L2A	14.5431	PRMT7	1.13133	MCM5	-369	TP53	0.00109529	PLK5	0.00155744	UGT1A10
4	KCNK18	12.34	CMTM1	1.11217	MCM3	-369	MCM5	0.00109409	KCNK18	0.00133095	COMMD3-BMI1
4	XRRA1	11.1036	EID1	1.09832	RFC4	-369	MCM3	0.00107759	COMMD3-BMI1	0.00115758	KCNK18
4	IL27	8.25755	SPSB4	1.09074	CDK2	-369	RFC4	0.00104712	IL27	0.000987163	XRRA1
3	UBAP1L	2.28341	IL31	1.08903	CDK1	-369	CDK2	0.00104603	XRRA1	0.000878049	IL27
3	CMTM1	1.75493	SMIM10L2A	1.07419	CCNE1	-369	CDK1	0.00103413	DNAH1	0.00083044	DNAH1
3	TDRP	1.13626	UGT1A10	1.05983	HDAC1	-369	CCNE1	0.00101937	UBAP1L	0.000761619	UBAP1L
3	DNAH1	0.815152	DNAH1	1.02446	CCNB1	-369	HDAC1	0.00100503	COX6B2	0.000493048	COX6B2
3	COX6B2	0.698761	ZFP57	0.955164	CCNA2	-369	CCNB1	0.000966184	CMTM1	0.00035512	TDRP
3	COMMD3-BMI1	0.51085	UBAP1L	0.779231	UGT1A10	-369	CCNA2	0.000963391	TDRP	0.000351186	CMTM1
2	IL31	0	COMMD3-BMI1	0	COMMD3-BMI1	-369	UGT1A10	0.000798085	IL31	1.44089e-05	IL31
0	LUZP6	0	LUZP6	0	LUZP6	-369	COMMD3-BMI1	0	LUZP6	0	LUZP6
