# Supplementary material for: Integrating Multi-Omics Analysis for Enhanced Diagnosis and Treatment of Glioblastoma: A Comprehensive Data-Driven Approach
Source: Preprints.org preprint supplement (doi:10.20944/preprints202303.0355.v1), 2023-03-20
Supplement: Supplementary file 4 [file Supplementary Table 11.xlsx]

## Sheet: Sheet1
Query	Match	HMDB	PubChem	KEGG	SMILES	Comment
L-Kynurenine	L-Kynurenine	HMDB0000684	161166	C00328	C1=CC=C(C(=C1)C(=O)C[C@@H](C(=O)O)N)N	1
L-Formylkynurenine	L-Formylkynurenine	HMDB0060485	25202092	C02700	N[C@@H](CC(=O)C1=CC=CC=C1NC=O)C(O)=O	1
Stearoylcarnitine	Stearoylcarnitine	HMDB0000848	52922056	NA	CCCCCCCCCCCCCCCCCC(=O)OC(CC(=O)[O-])C[N+](C)(C)C	1
Propionylcarnitine	Propionylcarnitine	HMDB0000824	107738	C03017	CCC(=O)OC(CC(=O)[O-])C[N+](C)(C)C	1
gamma-Glutamylleucine	gamma-Glutamylleucine	HMDB0011171	4524287	NA	CC(C)C[C@@H](C(=O)O)NC(=O)CC[C@@H](C(=O)O)N	1
L-Acetylcarnitine	L-Acetylcarnitine	HMDB0000201	7045767	C02571	CC(=O)OC(CC(=O)[O-])C[N+](C)(C)C	1
L-Carnitine	L-Carnitine	HMDB0000062	2724480	C00318	C[N+](C)(C)C[C@H](CC(=O)[O-])O	1
Tetradecanoylcarnitine	Tetradecanoylcarnitine	HMDB0005066	53477791	NA	CCCCCCCCCCCCCC(=O)O[C@H](CC(=O)[O-])C[N+](C)(C)C	1
NAD	NAD	HMDB0000902	5893	C00003	C1=CC(=C[N+](=C1)[C@H]2[C@@H]([C@@H]([C@H](O2)COP(=O)(O)OP(=O)(O)OC[C@@H]3[C@H]([C@H]([C@@H](O3)N4C=NC5=C4N=CN=C5N)O)O)O)O)C(=O)N	1
LysoPC(0:0/18:0)	LysoPC(0:0/18:0)	HMDB0011128	24779491	NA	CCCCCCCCCCCCCCCCCC(=O)O[C@H](CO)COP(=O)([O-])OCC[N+](C)(C)C	1
Pantothenic acid	Pantothenic acid	HMDB0000210	6613	C00864	CC(C)(CO)C(C(=O)NCCC(=O)O)O	1
Glutathione	Glutathione	HMDB0062697	745	C00051	NC(CCC(O)=NC(CS)C(O)=NCC(O)=O)C(O)=O	1
Xanthylic acid	Xanthylic acid	HMDB0001554	73323	C00655	C1=NC2=C(N1[C@H]3[C@@H]([C@@H]([C@H](O3)COP(=O)(O)O)O)O)NC(=O)NC2=O	1
Oxidized glutathione	Oxidized glutathione	HMDB0003337	975	C00127	C(CC(=O)NC(CSSCC(C(=O)NCC(=O)O)NC(=O)CCC(C(=O)O)N)C(=O)NCC(=O)O)C(C(=O)O)N	1
trans-Hexadec-2-enoyl carnitine	trans-Hexadec-2-enoyl carnitine	HMDB0006317	53477817	NA	CCCCCCCCCCCCC/C=C/C(=O)OC(CC(=O)[O-])C[N+](C)(C)C	1
Spermidine	Spermidine	HMDB0001257	1102	C00315	C(CCNCCCN)CN	1
ADP	ADP	HMDB0001341	6022	C00008	C1=NC2=C(C(=N1)N)N=CN2[C@H]3[C@@H]([C@@H]([C@H](O3)COP(=O)(O)OP(=O)(O)O)O)O	1
N-Oleoylethanolamine	N-Oleoylethanolamine	HMDB0002088	5283454	C20792	CCCCCCCC/C=C\CCCCCCCC(=O)NCCO	1
trans-Cinnamic acid	trans-Cinnamic acid	HMDB0000930	444539	C10438	C1=CC=C(C=C1)/C=C/C(=O)O	1
L-Proline	L-Proline	HMDB0000162	145742	C00148	C1C[C@H](NC1)C(=O)O	1
L-Valine	L-Valine	HMDB0000883	6287	C00183	CC(C)[C@@H](C(=O)O)N	1
2-Hydroxycinnamic acid	2-Hydroxycinnamic acid	HMDB0002641	637540	C01772	C1=CC=C(C(=C1)/C=C/C(=O)O)O	1
L-Leucine	L-Leucine	HMDB0000687	6106	C00123	CC(C)C[C@@H](C(=O)O)N	1
Inosinic acid	Inosinic acid	HMDB0000175	8582	C00130	C1=NC(=O)C2=C(N1)N(C=N2)[C@H]3[C@@H]([C@@H]([C@H](O3)COP(=O)(O)O)O)O	1
Glucose 6-phosphate	Glucose 6-phosphate	HMDB0001401	5958	C00092	C([C@@H]1[C@H]([C@@H]([C@H](C(O1)O)O)O)O)OP(=O)(O)O	1
Valerylcarnitine	Valerylcarnitine	HMDB0013128	53481619	NA	CCCCC(=O)O[C@@H](CC(=O)[O-])C[N+](C)(C)C	1
L-Palmitoylcarnitine	L-Palmitoylcarnitine	HMDB0000222	11953816	C02990	CCCCCCCCCCCCCCCC(=O)O[C@H](CC(=O)[O-])C[N+](C)(C)C	1
Oleoylcarnitine	Oleoylcarnitine	HMDB0005065	46907933	NA	CCCCCCCC/C=C\CCCCCCCC(=O)O[C@H](CC(=O)[O-])C[N+](C)(C)C	1
Guanosine	Guanosine	HMDB0000133	6802	C00387	C1=NC2=C(N1[C@H]3[C@@H]([C@@H]([C@H](O3)CO)O)O)NC(=NC2=O)N	1
Methionine sulfoxide	Methionine sulfoxide	HMDB0002005	847	C02989	CS(=O)CCC(C(=O)O)N	1
Guanine	Guanine	HMDB0000132	764	C00242	C1=NC2=C(N1)C(=O)N=C(N2)N	1
Pyrrolidonecarboxylic acid	Pyrrolidonecarboxylic acid	HMDB0000805	499	C02237	C1CC(=O)NC1C(=O)O	1
Creatine	Creatine	HMDB0000064	586	C00300	CN(CC(=O)O)C(=N)N	1
Guanosine monophosphate	Guanosine monophosphate	HMDB0001397	6804	C00144	C1=NC2=C(N1[C@H]3[C@@H]([C@@H]([C@H](O3)COP(=O)(O)O)O)O)NC(=NC2=O)N	1
Uridine 5'-monophosphate	Uridine 5'-monophosphate	HMDB0000288	6030	C00105	C1=CN(C(=O)NC1=O)[C@H]2[C@@H]([C@@H]([C@H](O2)COP(=O)(O)O)O)O	1
N-Acetyl-D-glucosamine	N-Acetyl-D-glucosamine	HMDB0000215	439174	C00140	CC(=O)N[C@@H]1[C@H]([C@@H]([C@H](OC1O)CO)O)O	1
Choline	Choline	HMDB0000097	305	C00114	C[N+](C)(C)CCO	1
L-Tryptophan	L-Tryptophan	HMDB0000929	6305	C00078	C1=CC=C2C(=C1)C(=CN2)C[C@@H](C(=O)O)N	1
Indoleacrylic acid	Indoleacrylic acid	HMDB0000734	15030923	NA	C1=CC=C2C(=C1)C=C(N2)/C=C/C(=O)O	1
Glycerophosphocholine	Glycerophosphocholine	HMDB0000086	71920	C00670	C[N+](C)(C)CCOP(=O)([O-])OC[C@H](CO)O	1
5'-Methylthioadenosine	5'-Methylthioadenosine	HMDB0001173	439176	C00170	CSC[C@@H]1[C@H]([C@H]([C@@H](O1)N2C=NC3=C2N=CN=C3N)O)O	1
L-Phenylalanine	L-Phenylalanine	HMDB0000159	6140	C00079	C1=CC=C(C=C1)C[C@@H](C(=O)O)N	1
Uridine diphosphate-N-acetylglucosamine	Uridine diphosphate-N-acetylglucosamine	HMDB0000290	9547196	C00043	CC(=O)N[C@@H]1[C@H]([C@@H]([C@H](O[C@@H]1OP(=O)(O)OP(=O)(O)OC[C@@H]2[C@H]([C@H]([C@@H](O2)N3C=CC(=O)NC3=O)O)O)CO)O)O	1
Uridine diphosphate glucose	Uridine diphosphate glucose	HMDB0000286	53477679	C00029	C1=CN(C(=O)NC1=O)[C@@H]2[C@H]([C@H]([C@@H](O2)COP(=O)(O)OP(=O)(O)OC3[C@H]([C@@H]([C@H]([C@@H](O3)CO)O)O)O)O)O	1
L-Tyrosine	L-Tyrosine	HMDB0000158	6057	C00082	C1=CC(=CC=C1C[C@@H](C(=O)O)N)O	1
N1-Acetylspermine	N1-Acetylspermine	HMDB0001186	916	C02567	CC(=O)NCCCNCCCCNCCCN	1
N1-Acetylspermidine	N1-Acetylspermidine	HMDB0001276	496	C00612	CC(=O)NCCCNCCCCN	1
L-Isoleucine	L-Isoleucine	HMDB0000172	6306	C00407	CC[C@H](C)[C@@H](C(=O)O)N	1
L-Lysine	L-Lysine	HMDB0000182	5962	C00047	C(CCN)C[C@@H](C(=O)O)N	1
L-Glutamic acid	L-Glutamic acid	HMDB0000148	33032	C00025	C(CC(=O)O)[C@@H](C(=O)O)N	1
L-Glutamine	L-Glutamine	HMDB0000641	5961	C00064	C(CC(=O)N)[C@@H](C(=O)O)N	1
L-Threonine	L-Threonine	HMDB0000167	6288	C00188	C[C@H]([C@@H](C(=O)O)N)O	1
Taurine	Taurine	HMDB0000251	1123	C00245	C(CS(=O)(=O)O)N	1
L-Lactic acid	L-Lactic acid	HMDB0000190	61503	C00186	C[C@@H](C(=O)O)O	1
myo-Inositol	myo-Inositol	HMDB0000211	NA	C00137	O[C@H]1[C@H](O)[C@@H](O)[C@H](O)[C@H](O)[C@@H]1O	1
Formic acid	Formic acid	HMDB0000142	284	C00058	C(=O)O	1
Acetic acid	Acetic acid	HMDB0000042	176	C00033	CC(=O)O	1
Acetoacetic acid	Acetoacetic acid	HMDB0000060	96	C00164	CC(=O)CC(=O)O	1
N-Acetyl-L-aspartic acid	N-Acetyl-L-aspartic acid	HMDB0000812	65065	C01042	CC(=O)N[C@@H](CC(=O)O)C(=O)O	1
L-Alanine	L-Alanine	HMDB0000161	5950	C00041	C[C@@H](C(=O)O)N	1
Alanyl-Glutamine	Alanyl-Glutamine	HMDB0028685	542027	NA	CC(N)C(=O)NC(CCC(N)=O)C(O)=O	1
L-Arginine	L-Arginine	HMDB0000517	6322	C00062	C(C[C@@H](C(=O)O)N)CN=C(N)N	1
L-Asparagine	L-Asparagine	HMDB0000168	6267	C00152	C([C@@H](C(=O)O)N)C(=O)N	1
L-Aspartic acid	L-Aspartic acid	HMDB0000191	5960	C00049	C([C@@H](C(=O)O)N)C(=O)O	1
Cadaverine	Cadaverine	HMDB0002322	273	C01672	C(CCN)CCN	1
Citric acid	Citric acid	HMDB0000094	311	C00158	C(C(=O)O)C(CC(=O)O)(C(=O)O)O	1
Dimethylamine	Dimethylamine	HMDB0000087	674	C00543	CNC	1
Ethanol	Ethanol	HMDB0000108	702	C00469	CCO	1
Fumaric acid	Fumaric acid	HMDB0000134	444972	C00122	C(=C/C(=O)O)\C(=O)O	1
D-Glucose	D-Glucose	HMDB0000122	5793	C00221	C([C@@H]1[C@H]([C@@H]([C@H](C(O1)O)O)O)O)O	1
Glycine	Glycine	HMDB0000123	750	C00037	C(C(=O)O)N	1
L-Malic acid	L-Malic acid	HMDB0000156	222656	C00149	C([C@@H](C(=O)O)O)C(=O)O	1
L-Methionine	L-Methionine	HMDB0000696	6137	C00073	CSCC[C@@H](C(=O)O)N	1
Ketoleucine	Ketoleucine	HMDB0000695	70	C00233	CC(C)CC(=O)C(=O)O	1
Niacinamide	Niacinamide	HMDB0001406	936	C00153	C1=CC(=CN=C1)C(=O)N	1
Succinic acid	Succinic acid	HMDB0000254	1110	C00042	C(CC(=O)O)C(=O)O	1
Phosphocreatine	Phosphocreatine	HMDB0001511	587	C02305	CN(CC(=O)O)C(=NP(=O)(O)O)N	1
L-Cysteine	L-Cysteine	HMDB0000574	5862	C00097	C([C@@H](C(=O)O)N)S	1
Hypotaurine	Hypotaurine	HMDB0000965	107812	C00519	C(CS(=O)O)N	1
L-Cystine	L-Cystine	HMDB0000192	67678	C00491	C([C@@H](C(=O)O)N)SSC[C@@H](C(=O)O)N	1
Pyrophosphate	Pyrophosphate	HMDB0000250	644102	C00013	[O-]P(=O)([O-])OP(=O)([O-])[O-]	1
D-Erythrose 4-phosphate	D-Erythrose 4-phosphate	HMDB0001321	122357	C00279	C([C@H]([C@H](C=O)O)O)OP(=O)(O)O	1
Glucaric acid	Glucaric acid	HMDB0000663	33037	C00818	[C@H]([C@@H]([C@@H](C(=O)O)O)O)([C@H](C(=O)O)O)O	1
Erythrono-1,4-lactone	Erythrono-1,4-lactone	HMDB0000349	5325915	NA	C1[C@H]([C@H](C(=O)O1)O)O	1
D-Ribose	D-Ribose	HMDB0000283	5779	C00121	C([C@@H]1[C@H]([C@H](C(O1)O)O)O)O	1
D-Ribose 5-phosphate	D-Ribose 5-phosphate	HMDB0001548	439167	C00117	C([C@@H]1[C@H]([C@H](C(O1)O)O)O)OP(=O)(O)O	1
Putrescine	Putrescine	HMDB0001414	1045	C00134	C(CCN)CN	1
Adenine	Adenine	HMDB0000034	190	C00147	C1=NC2=C(N1)C(=NC=N2)N	1
Hypoxanthine	Hypoxanthine	HMDB0000157	790	C00262	C1=NC2=C(N1)C(=O)N=CN2	1
Uracil	Uracil	HMDB0000300	1174	C00106	C1=CNC(=O)NC1=O	1
Uridine	Uridine	HMDB0000296	6029	C00299	C1=CN(C(=O)NC1=O)[C@H]2[C@@H]([C@@H]([C@H](O2)CO)O)O	1
Erythritol	Erythritol	HMDB0002994	222285	C00503	C([C@H]([C@H](CO)O)O)O	1
Ammonia	Ammonia	HMDB0000051	222	C00014	N	1
Asymmetric dimethylarginine	Asymmetric dimethylarginine	HMDB0001539	123831	C03626	CN(C)C(=NCCC[C@@H](C(=O)O)N)N	1
Citrulline	Citrulline	HMDB0000904	9750	C00327	C(C[C@@H](C(=O)O)N)CNC(=O)N	1
Ornithine	Ornithine	HMDB0000214	6262	C00077	C(C[C@@H](C(=O)O)N)CN	1
N-Acetylornithine	N-Acetylornithine	HMDB0003357	439232	C00437	CC(=O)N[C@@H](CCCN)C(=O)O	1
1,2-Ethanediamine	1,2-Ethanediamine	HMDB0031225	3301	NA	C(CN)N	1
2,4,6-Triethyl-1,3,5-trioxane	2,4,6-Triethyl-1,3,5-trioxane	HMDB0034040	95669	NA	CCC1OC(OC(O1)CC)CC	1
Glycerol 1-octadecanoate	Glycerol 1-octadecanoate	HMDB0031075	24699	NA	CCCCCCCCCCCCCCCCCC(=O)OCC(CO)O	1
Aminomalonic acid	Aminomalonic acid	HMDB0001147	100714	C00872	C(C(=O)O)(C(=O)O)N	1
Cellotriose	Cellotriose	METPA0796	NA	C06219	NA	1
DHAP(8:0)	DHAP(8:0)	HMDB0011685	53481029	NA	CCCCCCCC(=O)OCC(=O)COP(=O)(O)O	1
Elaidic acid	Elaidic acid	HMDB0000573	637517	C01712	CCCCCCCC/C=C\CCCCCCCC(=O)O	1
N-Acetyl-L-glutamyl 5-phosphate	N-Acetyl-L-glutamyl 5-phosphate	HMDB0006456	440236	C04133	CC(=O)N[C@@H](CCC(=O)OP(=O)(O)O)C(=O)O	1
Pelargonic acid	Pelargonic acid	HMDB0000847	8158	C01601	CCCCCCCCC(=O)O	1
Phosphoric acid	Phosphoric acid	HMDB0002142	57424078	C00009	OP(=O)(O)O	1
Pyrazine	Pyrazine	HMDB0034176	9261	C02018	C1=CN=CC=N1	1
Stearic acid	Stearic acid	HMDB0000827	5281	C01530	CCCCCCCCCCCCCCCCCC(=O)O	1
D-Xylitol	D-Xylitol	HMDB0002917	6912	C00379	C([C@H](C([C@H](CO)O)O)O)O	1
Uridine 5'-diphosphate	Uridine 5'-diphosphate	HMDB0000295	6031	C00015	C1=CN(C(=O)NC1=O)[C@H]2[C@@H]([C@@H]([C@H](O2)COP(=O)(O)OP(=O)(O)O)O)O	1
Phosphorylcholine	Phosphorylcholine	HMDB0001565	8691	C00588	C[N+](C)(C)CCOP(=O)(O)O	1
Gamma-Aminobutyric acid	Gamma-Aminobutyric acid	HMDB0000112	223130	C00334	C(CC(=O)O)CN	1
Glycerol 3-phosphate	Glycerol 3-phosphate	HMDB0000126	439162	C00093	C([C@H](COP(=O)(O)O)O)O	1
Serine	Serine	HMDB0062263	5951	C00716	N[C@@H](CO)C(O)=O	1
cis-Aconitic acid	cis-Aconitic acid	HMDB0000072	643757	C00417	C(/C(=C/C(=O)O)/C(=O)O)C(=O)O	1
Cytidine monophosphate	Cytidine monophosphate	HMDB0000095	8117	C00055	C1=CN(C(=O)N=C1N)[C@H]2[C@@H]([C@@H]([C@H](O2)COP(=O)(O)O)O)O	1
scyllo-Inositol	scyllo-Inositol	HMDB0006088	892	C06153	C1(C(C(C(C(C1O)O)O)O)O)O	1
2-Hydroxyglutarate	2-Hydroxyglutarate	HMDB0059655	43	C02630	OC(CCC(O)=O)C(O)=O	1
Phosphoenolpyruvic acid	Phosphoenolpyruvic acid	HMDB0000263	1005	C00074	C=C(C(=O)O)OP(=O)(O)O	1
Pyruvic acid	Pyruvic acid	HMDB0000243	1060	C00022	CC(=O)C(=O)O	1
L-Histidine	L-Histidine	HMDB0000177	6274	C00135	C1=C(NC=N1)C[C@@H](C(=O)O)N	1
Palmitic acid	Palmitic acid	HMDB0000220	985	C00249	CCCCCCCCCCCCCCCC(=O)O	1
Phosphatidylserine	Phosphatidylserine	HMDB0014291	6323481	NA	CCCC(=O)O[C@H](COC(=O)CC)COP(=O)(O)OC[C@@H](C(=O)O)N	1
Ethanolamine	Ethanolamine	HMDB0000149	700	C00189	C(CO)N	1
Cholesterol	Cholesterol	HMDB0000067	5997	C00187	C[C@H](CCCC(C)C)[C@H]1CC[C@@H]2[C@@]1(CC[C@H]3[C@H]2CC=C4[C@@]3(CCC(C4)O)C)C	1
Glycerol	Glycerol	HMDB0000131	753	C00116	C(C(CO)O)O	1
Acetone	Acetone	HMDB0001659	180	C00207	CC(=O)C	1
Adenosine	Adenosine	HMDB0000050	60961	C00212	C1=NC2=C(C(=N1)N)N=CN2[C@H]3[C@@H]([C@@H]([C@H](O3)CO)O)O	1
Isocitric acid	Isocitric acid	HMDB0000193	1198	C00311	C(C(C(C(=O)O)O)C(=O)O)C(=O)O	1
Oxoglutaric acid	Oxoglutaric acid	HMDB0000208	51	C00026	C(CC(=O)O)C(=O)C(=O)O	1
Cardiolipin	Cardiolipin	METPA0728	NA	C05980	NA	1
SM(d18:1/18:0)	SM(d18:1/18:0)	HMDB0001348	5283588	C00550	CCCCCCCCCCCCCCCCCC(=O)N[C@@H](COP(=O)(O)OCC[N+](C)(C)C)[C@@H](/C=C/CCCCCCCCCCCCC)O	1
Glucosylceramide	Glucosylceramide	HMDB0000140	53477677	C01190	CCCCCCCCCCCCCCCCCCCCCCCC(=O)N[C@@H](CO[C@H]1[C@@H]([C@H](C([C@H](O1)CO)O)O)O)[C@@H](/C=C/CCCCCCCCCCCCC)O	1
Phosphatidylglycerol	Phosphatidylglycerol	METPA0033	NA	C00344	NA	1
1-Phosphatidyl-D-myo-inositol	1-Phosphatidyl-D-myo-inositol	HMDB0006953	53477912	C01194	C(C(COP(=O)(O)OC1[C@@H]([C@H](C(C([C@@H]1O)O)O)O)O)OC=O)OC=O	1
TG(10:0/10:0/10:0)	TG(10:0/10:0/10:0)	HMDB0000548	69310	NA	CCCCCCCCCC(=O)OCC(COC(=O)CCCCCCCCC)OC(=O)CCCCCCCCC	1
Beta-D-Glucose	Beta-D-Glucose	HMDB0000516	64689	C00221	C([C@@H]1[C@H]([C@@H]([C@H]([C@@H](O1)O)O)O)O)O	1
N-Acetylaspartylglutamic acid	N-Acetylaspartylglutamic acid	HMDB0001067	5255	C12270	CC(=O)NC(CC(=O)O)C(=O)NC(CCC(=O)O)C(=O)O	1
Deoxyadenosine triphosphate	Deoxyadenosine triphosphate	HMDB0001532	15993	C00131	C1[C@@H]([C@H](O[C@H]1N2C=NC3=C2N=CN=C3N)COP(=O)(O)OP(=O)(O)OP(=O)(O)O)O	1
dCTP	dCTP	HMDB0000998	65091	C00458	C1[C@@H]([C@H](O[C@H]1N2C=CC(=NC2=O)N)COP(=O)(O)OP(=O)(O)OP(=O)(O)O)O	1
Thymidine 5'-triphosphate	Thymidine 5'-triphosphate	HMDB0001342	64968	C00459	CC1=CN(C(=O)NC1=O)[C@H]2C[C@@H]([C@H](O2)COP(=O)(O)OP(=O)(O)OP(=O)(O)O)O	1
Orotic acid	Orotic acid	HMDB0000226	967	C00295	C1=C(NC(=O)NC1=O)C(=O)O	1
N-Acetylgalactosamine	N-Acetylgalactosamine	HMDB0000212	84265	C01074	CC(=O)N[C@@H]1[C@H]([C@H]([C@H](O[C@@H]1O)CO)O)O	1
3-Methyl-2-oxovaleric acid	3-Methyl-2-oxovaleric acid	HMDB0000491	47	C00671	CCC(C)C(=O)C(=O)O	1
5-Methyldeoxycytidine	5-Methyldeoxycytidine	HMDB0002224	440055	C03592	CC1=CN(C(=O)N=C1N)[C@H]2CC([C@H](O2)CO)O	1
Acetylcysteine	Acetylcysteine	HMDB0001890	12035	C06809	CC(=O)N[C@@H](CS)C(=O)O	1
Dopamine quinone	Dopamine quinone	HMDB0012219	162602	C17755	C1=CC(=O)C(=O)C=C1CCN	1
Glutaminylcysteine	Glutaminylcysteine	HMDB0028794	54471413	NA	C(CC(=O)N)[C@@H](C(=O)N[C@@H](CS)C(=O)O)N	1
Glyceraldehyde	Glyceraldehyde	HMDB0001051	751	C02154	C(C(C=O)O)O	1
Isovalerylglutamic acid	Isovalerylglutamic acid	HMDB0000726	133383	NA	CC(C)CC(=O)N[C@@H](CCC(=O)O)C(=O)O	1
N2,N2-Dimethylguanosine	N2,N2-Dimethylguanosine	HMDB0004824	92919	NA	CN(C)C1=NC(=O)C2=C(N1)N(C=N2)[C@H]3[C@@H]([C@@H]([C@H](O3)CO)O)O	1
N-Succinyl-2-amino-6-ketopimelate	N-Succinyl-2-amino-6-ketopimelate	HMDB0012266	440349	C04462	C(C[C@@H](C(=O)O)NC(=O)CCC(=O)O)CC(=O)C(=O)O	1
Phosphoglycolic acid	Phosphoglycolic acid	HMDB0000816	529	C00988	C(C(=O)O)OP(=O)(O)O	1
Pyroglutamic acid	Pyroglutamic acid	HMDB0000267	7405	C01879	C1CC(=O)N[C@@H]1C(=O)O	1
(S)-Succinyldihydrolipoamide	(S)-Succinyldihydrolipoamide	HMDB0001177	439425	C01169	C(CCC(=O)N)C[C@H](CCS)SC(=O)CCC(=O)O	1
Taurocholic acid	Taurocholic acid	HMDB0000036	6675	C05122	CC(CCC(=O)NCCS(=O)(=O)O)C1CCC2C1([C@H](CC3C2[C@@H](C[C@H]4C3(CC[C@H](C4)O)C)O)O)C	1
L-Homoserine	L-Homoserine	HMDB0000719	12647	C00263	C(CO)[C@@H](C(=O)O)N	1
Dodecanoic acid	Dodecanoic acid	HMDB0000638	3893	C02679	CCCCCCCCCCCC(=O)O	1
Caproic acid	Caproic acid	HMDB0000535	8892	C01585	CCCCCC(=O)O	1
N-Acetylserotonin	N-Acetylserotonin	HMDB0001238	903	C00978	CC(=O)NCCC1=CNC2=C1C=C(C=C2)O	1
Stachyose	Stachyose	HMDB0003553	439531	C01613	C([C@@H]1[C@@H]([C@@H]([C@H]([C@H](O1)OC[C@@H]2[C@@H]([C@@H]([C@H]([C@H](O2)OC[C@@H]3[C@H]([C@@H]([C@H]([C@H](O3)O[C@]4([C@H]([C@@H]([C@H](O4)CO)O)O)CO)O)O)O)O)O)O)O)O)O)O	1
D-Fructose	D-Fructose	HMDB0000660	439709	C02336	C([C@@H]1[C@H]([C@@H]([C@](O1)(CO)O)O)O)O	1
Selenomethionine	Selenomethionine	HMDB0003966	15103	C05335	C[Se]CCC(C(=O)O)N	1
Guanidoacetic acid	Guanidoacetic acid	HMDB0000128	763	C00581	C(C(=O)O)N=C(N)N	1
Guaiacol	Guaiacol	HMDB0001398	4671	C15572	COC1=CC=CC=C1O	1
L-Norleucine	L-Norleucine	HMDB0001645	21236	C01933	CCCC[C@@H](C(=O)O)N	1
Norvaline	Norvaline	HMDB0013716	439575	C01799	CCC[C@H](C(=O)O)N	1
S-Adenosylmethionine	S-Adenosylmethionine	HMDB0001185	16757548	C00019	C[S+](CC[C@H](C(=O)O)N)C[C@@H]1[C@H]([C@H]([C@@H](O1)N2C=NC3=C2N=CN=C3N)O)O	1
S-Adenosylhomocysteine	S-Adenosylhomocysteine	HMDB0000939	439155	C00021	C1=NC2=C(C(=N1)N)N=CN2[C@H]3[C@@H]([C@@H]([C@H](O3)CSCC[C@@H](C(=O)O)N)O)O	1
5-Aminolevulinic acid	5-Aminolevulinic acid	HMDB0001149	137	C00430	C(CC(=O)O)C(=O)CN	1
gamma-Glutamylcysteine	gamma-Glutamylcysteine	HMDB0001049	123938	C00669	C(CC(=O)N[C@@H](CS)C(=O)O)[C@@H](C(=O)O)N	1
Adenosine monophosphate	Adenosine monophosphate	HMDB0000045	6083	C00020	C1=NC2=C(C(=N1)N)N=CN2[C@H]3[C@@H]([C@@H]([C@H](O3)COP(=O)(O)O)O)O	1
Adenosine triphosphate	Adenosine triphosphate	HMDB0000538	5957	C00002	C1=NC2=C(C(=N1)N)N=CN2[C@H]3[C@@H]([C@@H]([C@H](O3)COP(=O)(O)OP(=O)(O)OP(=O)(O)O)O)O	1
Cytidine triphosphate	Cytidine triphosphate	HMDB0000082	6176	C00063	C1=CN(C(=O)N=C1N)[C@H]2[C@@H]([C@@H]([C@H](O2)COP(=O)(O)OP(=O)(O)OP(=O)(O)O)O)O	1
Dihydrofolic acid	Dihydrofolic acid	HMDB0001056	98792	C00415	C1C(=NC2=C(N1)NC(=NC2=O)N)CNC3=CC=C(C=C3)C(=O)N[C@@H](CCC(=O)O)C(=O)O	1
5-Thymidylic acid	5-Thymidylic acid	HMDB0001227	9700	C00364	CC1=CN(C(=O)NC1=O)[C@H]2C[C@@H]([C@H](O2)COP(=O)(O)O)O	1
dUMP	dUMP	HMDB0001409	65063	C00365	C1[C@@H]([C@H](O[C@H]1N2C=CC(=O)NC2=O)COP(=O)(O)O)O	1
3-Hydroxy-3-methylglutaryl-CoA	3-Hydroxy-3-methylglutaryl-CoA	HMDB0001375	439218	C00356	C[C@](CC(=O)O)(CC(=O)SCCNC(=O)CCNC(=O)C(C(C)(C)COP(=O)(O)OP(=O)(O)OC[C@@H]1[C@H]([C@H]([C@@H](O1)N2C=NC3=C2N=CN=C3N)O)OP(=O)(O)O)O)O	1
NADH	NADH	HMDB0001487	928	C00004	C1C=CN(C=C1C(=O)N)C2C(C(C(O2)COP(=O)(O)OP(=O)(O)OCC3C(C(C(O3)N4C=NC5=C4N=CN=C5N)O)O)O)O	1
NADP	NADP	HMDB0000217	5886	C00006	C1=CC(=C[N+](=C1)[C@H]2[C@@H]([C@@H]([C@H](O2)COP(=O)(O)OP(=O)(O)OC[C@@H]3[C@H]([C@H]([C@@H](O3)N4C=NC5=C4N=CN=C5N)OP(=O)(O)O)O)O)O)C(=O)N	1
Tetrahydrofolic acid	Tetrahydrofolic acid	HMDB0001846	5280320	C00101	C1C(NC2=C(N1)NC(=NC2=O)N)CNC3=CC=C(C=C3)C(=O)N[C@@H](CCC(=O)O)C(=O)O	1
