# Supplementary material for: Integrating Multi-Omics Analysis for Enhanced Diagnosis and Treatment of Glioblastoma: A Comprehensive Data-Driven Approach
Source: Preprints.org preprint supplement (doi:10.20944/preprints202303.0355.v1), 2023-03-20
Supplement: Supplementary file 5 [file Supplementary Table 12.xlsx]

## Sheet: Sheet1
Pathway	Total	Expected	Hits	P.Value	FDR
Negative regulation of cellular process	4110	2.87	10	3.81e-06	0.00165
Regulation of cell cycle	886	0.62	6	9.46e-06	0.00165
Protein phosphorylation	1480	1.04	7	1.17e-05	0.00165
Negative regulation of biological process	4590	3.21	10	1.17e-05	0.00165
Regulation of apoptotic process	1540	1.07	7	1.46e-05	0.00165
Regulation of programmed cell death	1550	1.09	7	1.58e-05	0.00165
Mitotic cell cycle	968	0.677	6	1.58e-05	0.00165
Regulation of response to stimulus	3360	2.35	9	1.72e-05	0.00165
Negative regulation of transcription from RNA polymerase II promoter	552	0.386	5	1.81e-05	0.00165
Regulation of signal transduction	2440	1.7	8	2.29e-05	0.00179
Intracellular receptor mediated signaling pathway	270	0.189	4	2.39e-05	0.00179
Phosphorylation	1680	1.17	7	2.65e-05	0.00181
Cell development	1840	1.29	7	4.96e-05	0.00307
Cell cycle	1860	1.3	7	5.25e-05	0.00307
Regulation of mitotic cell cycle	351	0.246	4	6.69e-05	0.00342
Positive regulation of transcription, DNA_dependent	1260	0.88	6	7.09e-05	0.00342
Positive regulation of transcription, DNA_dependent	1260	0.88	6	7.09e-05	0.00342
Generation of neurons	1300	0.913	6	8.69e-05	0.00378
Central nervous system development	784	0.549	5	9.82e-05	0.00378
Positive regulation of RNA metabolic process	1330	0.933	6	9.84e-05	0.00378
Positive regulation of transcription from RNA polymerase II promoter	800	0.56	5	0.000108	0.00378
Anatomical structure formation involved in morphogenesis	2090	1.46	7	0.000113	0.00378
Neurogenesis	1390	0.974	6	0.000125	0.00378
Mitotic cell cycle checkpoint	149	0.104	3	0.000126	0.00378
Cell morphogenesis involved in differentiation	827	0.579	5	0.000127	0.00378
Apoptotic process	2130	1.49	7	0.000128	0.00378
Apoptotic process	2130	1.49	7	0.000128	0.00378
Positive regulation of I_kappaB kinase/NF_kappaB cascade	150	0.105	3	0.000129	0.00378
Programmed cell death	2160	1.51	7	0.000139	0.00393
Regulation of neurogenesis	444	0.311	4	0.000166	0.00455
Neuron apoptotic process	169	0.118	3	0.000184	0.00473
Positive regulation of nucleobase_containing compound metabolic process	1490	1.04	6	0.000185	0.00473
Regulation of cellular metabolic process	6120	4.28	10	0.000208	0.00507
Notch signaling pathway	177	0.124	3	0.00021	0.00507
Protein modification process	3290	2.3	8	0.000225	0.00527
Positive regulation of response to stimulus	1550	1.09	6	0.000233	0.0053
Regulation of transcription from RNA polymerase II promoter	1610	1.13	6	0.000283	0.00602
Negative regulation of transcription, DNA_dependent	987	0.691	5	0.000293	0.00602
Negative regulation of transcription, DNA_dependent	987	0.691	5	0.000293	0.00602
Negative regulation of cell cycle	520	0.364	4	0.000306	0.00602
Macromolecule modification	3430	2.4	8	0.000306	0.00602
Positive regulation of signal transduction	998	0.698	5	0.000308	0.00602
Negative regulation of RNA metabolic process	1020	0.717	5	0.000348	0.00644
Regulation of I_kappaB kinase/NF_kappaB cascade	210	0.147	3	0.000348	0.00644
Negative regulation of cell differentiation	540	0.378	4	0.000353	0.00644
Positive regulation of cellular process	4780	3.34	9	0.000365	0.0065
Positive regulation of cellular metabolic process	2530	1.77	7	0.000391	0.00663
Transcription initiation from RNA polymerase II promoter	219	0.153	3	0.000394	0.00663
Brain development	559	0.391	4	0.000403	0.00663
Transforming growth factor beta receptor signaling pathway	221	0.155	3	0.000404	0.00663
Embryonic morphogenesis	581	0.407	4	0.000467	0.00751
Cellular component assembly	1790	1.25	6	0.000512	0.00807
Macromolecular complex assembly	1120	0.785	5	0.000534	0.00826
I_kappaB kinase/NF_kappaB cascade	246	0.172	3	0.000553	0.00826
Negative regulation of nucleobase_containing compound metabolic process	1130	0.792	5	0.000554	0.00826
Regulation of protein metabolic process	1820	1.28	6	0.000571	0.00837
Positive regulation of metabolic process	2690	1.88	7	0.000587	0.00845
Regulation of transcription, DNA_dependent	3770	2.64	8	0.00062	0.00845
Regulation of transcription, DNA_dependent	3770	2.64	8	0.00062	0.00845
Regulation of transcription, DNA_dependent	3770	2.64	8	0.00062	0.00845
DNA_dependent transcription, initiation	257	0.18	3	0.000629	0.00845
Enzyme linked receptor protein signaling pathway	1180	0.822	5	0.000661	0.00875
Response to chemical stimulus	3830	2.68	8	0.000695	0.00905
Regulation of metabolic process	6920	4.84	10	0.00071	0.00909
Transcription from RNA polymerase II promoter	1930	1.35	6	0.000775	0.00961
Anatomical structure morphogenesis	2820	1.97	7	0.000782	0.00961
Negative regulation of cellular biosynthetic process	1220	0.855	5	0.000793	0.00961
Regulation of RNA metabolic process	3900	2.73	8	0.000799	0.00961
Cell cycle checkpoint	281	0.197	3	0.000815	0.00961
Negative regulation of developmental process	674	0.472	4	0.00082	0.00961
Negative regulation of apoptotic process	679	0.475	4	0.000844	0.00961
Negative regulation of apoptotic process	679	0.475	4	0.000844	0.00961
Negative regulation of biosynthetic process	1240	0.869	5	0.000855	0.00961
Regulation of protein modification process	1250	0.873	5	0.000874	0.00969
Negative regulation of programmed cell death	691	0.484	4	0.000901	0.00985
Androgen receptor signaling pathway	67	0.0469	2	0.000951	0.0103
Positive regulation of biological process	5500	3.85	9	0.0012	0.0128
Protein metabolic process	5570	3.9	9	0.00134	0.0141
Transmembrane receptor protein tyrosine kinase signaling pathway	782	0.547	4	0.00143	0.0148
Apoptotic mitochondrial changes	83	0.0581	2	0.00146	0.0148
Response to drug	344	0.241	3	0.00146	0.0148
Negative regulation of signal transduction	790	0.553	4	0.00149	0.0149
Cell cycle process	1420	0.99	5	0.00156	0.0152
Nervous system development	2190	1.53	6	0.00156	0.0152
Protein oligomerization	357	0.25	3	0.00163	0.0157
Epithelial to mesenchymal transition	96	0.0672	2	0.00194	0.0185
Protein complex assembly	861	0.603	4	0.00205	0.0193
Transmembrane receptor protein serine/threonine kinase signaling pathway	388	0.272	3	0.00207	0.0193
Organ development	3290	2.3	7	0.0021	0.0194
Regulation of gene expression	4480	3.14	8	0.00219	0.0199
Chromosome organization	878	0.615	4	0.00221	0.0199
Regulation of nucleobase_containing compound metabolic process	4540	3.18	8	0.00239	0.0208
Cellular protein metabolic process	4540	3.18	8	0.0024	0.0208
Regulation of transforming growth factor beta receptor signaling pathway	107	0.0749	2	0.0024	0.0208
Regulation of cellular protein metabolic process	1560	1.09	5	0.00241	0.0208
Chromatin remodeling	111	0.0777	2	0.00258	0.0221
Intracellular steroid hormone receptor signaling pathway	113	0.0791	2	0.00268	0.0226
Interaction with host	426	0.298	3	0.0027	0.0226
Cell cycle arrest	428	0.3	3	0.00274	0.0227
DNA damage response, signal transduction by p53 class mediator	117	0.0819	2	0.00287	0.023
Cell maturation	117	0.0819	2	0.00287	0.023
Interphase of mitotic cell cycle	435	0.304	3	0.00287	0.023
Neuron development	945	0.661	4	0.00289	0.023
Regulation of multicellular organismal process	2480	1.74	6	0.00301	0.0236
Interphase	443	0.31	3	0.00302	0.0236
Regulation of chromosome organization	122	0.0854	2	0.00311	0.0241
Negative regulation of response to stimulus	967	0.677	4	0.00315	0.0241
Negative regulation of cellular metabolic process	1660	1.16	5	0.00324	0.0246
Regulation of protein phosphorylation	987	0.691	4	0.00339	0.0255
Tissue development	1680	1.18	5	0.00343	0.0255
Signal transduction in response to DNA damage	129	0.0903	2	0.00347	0.0256
Response to toxin	130	0.091	2	0.00352	0.0258
Transcription, DNA_dependent	4830	3.38	8	0.00377	0.0272
Transcription, DNA_dependent	4830	3.38	8	0.00377	0.0272
Regulation of catalytic activity	1730	1.21	5	0.00387	0.0276
Reproductive process	1740	1.22	5	0.00399	0.0282
DNA damage checkpoint	143	0.1	2	0.00425	0.0298
Cellular localization	2650	1.86	6	0.00431	0.0299
RNA biosynthetic process	4930	3.45	8	0.00435	0.03
Locomotory behavior	147	0.103	2	0.00448	0.03
