# Supplementary material for: Integrating Multi-Omics Analysis for Enhanced Diagnosis and Treatment of Glioblastoma: A Comprehensive Data-Driven Approach
Source: Preprints.org preprint supplement (doi:10.20944/preprints202303.0355.v1), 2023-03-20
Supplement: Supplementary file 6 [file Supplementary Table 13.xlsx]

## Sheet: Sheet1
Pathway	Total	Expected	Hits	P.Value	FDR
Enzyme binding	1200	0.745	7	8.14e-07	0.000316
Positive regulation of transcription, DNA_dependent	1260	0.782	6	2.84e-05	0.0055
Negative regulation of transcription, DNA_dependent	987	0.613	5	0.000146	0.0188
Transcription from RNA polymerase II promoter	1930	1.2	6	0.000325	0.0315
Histone deacetylase binding	65	0.0404	2	0.0007	0.0543
Protein phosphatase binding	74	0.046	2	0.000906	0.0586
Protein N_terminus binding	86	0.0534	2	0.00122	0.0677
Phosphatase binding	116	0.0721	2	0.00221	0.107
Transcription factor binding	509	0.316	3	0.00309	0.133
Transcription cofactor activity	552	0.343	3	0.0039	0.143
Protein domain specific binding	560	0.348	3	0.00406	0.143
Protein binding transcription factor activity	600	0.373	3	0.00493	0.159
Transcription corepressor activity	208	0.129	2	0.00692	0.206
Transcription coactivator activity	312	0.194	2	0.0151	0.411
DNA binding	2760	1.71	5	0.0159	0.411
Chromatin binding	338	0.21	2	0.0175	0.412
Protein kinase activity	960	0.597	3	0.018	0.412
Protein kinase binding	376	0.234	2	0.0215	0.462
Protein deacetylase activity	39	0.0242	1	0.024	0.463
Kinase binding	418	0.26	2	0.0262	0.463
Phosphotransferase activity, alcohol group as acceptor	1110	0.687	3	0.0263	0.463
Damaged DNA binding	46	0.0286	1	0.0282	0.463
Chaperone binding	46	0.0286	1	0.0282	0.463
Enzyme regulator activity	1140	0.71	3	0.0286	0.463
Kinase activity	1190	0.738	3	0.0318	0.476
Deacetylase activity	52	0.0323	1	0.0319	0.476
Copper ion binding	65	0.0404	1	0.0397	0.539
SMAD binding	68	0.0423	1	0.0415	0.539
Steroid hormone receptor binding	69	0.0429	1	0.0421	0.539
RNA polymerase II transcription cofactor activity	73	0.0454	1	0.0445	0.539
Transferase activity, transferring phosphorus_containing groups	1370	0.85	3	0.0457	0.539
Hydrolase activity, acting on carbon_nitrogen (but not peptide) bonds, in linear amides	76	0.0472	1	0.0463	0.539
Protein serine/threonine kinase activity	572	0.356	2	0.0466	0.539
DNA_dependent ATPase activity	80	0.0497	1	0.0486	0.539
Phosphatase regulator activity	80	0.0497	1	0.0486	0.539
