# Supplementary material for: Integrating Multi-Omics Analysis for Enhanced Diagnosis and Treatment of Glioblastoma: A Comprehensive Data-Driven Approach
Source: Preprints.org preprint supplement (doi:10.20944/preprints202303.0355.v1), 2023-03-20
Supplement: Supplementary file 7 [file Supplementary Table 14.xlsx]

## Sheet: Sheet1
Pathway	Total	Expected	Hits	P.Value	FDR
Nuclear chromatin	159	0.0954	5	1.8e-08	4.04e-06
Nuclear chromosome part	273	0.164	5	2.68e-07	3.01e-05
Nuclear chromosome	320	0.192	5	5.88e-07	3.63e-05
Chromatin	326	0.196	5	6.45e-07	3.63e-05
Histone deacetylase complex	53	0.0318	3	3.58e-06	0.000161
Cytosol	2660	1.6	8	1.4e-05	0.000524
Nucleoplasm	1820	1.09	7	1.65e-05	0.000531
Chromosomal part	670	0.402	5	2.2e-05	0.000619
Chromosome	784	0.47	5	4.7e-05	0.00117
Organelle lumen	3380	2.03	8	8.69e-05	0.00186
Nucleoplasm part	910	0.546	5	9.6e-05	0.00186
Membrane_enclosed lumen	3440	2.07	8	9.9e-05	0.00186
Nuclear lumen	2690	1.61	7	0.000216	0.00374
Non_membrane_bounded organelle	3940	2.37	8	0.000274	0.00411
Intracellular non_membrane_bounded organelle	3940	2.37	8	0.000274	0.00411
Apical part of cell	289	0.173	3	0.000565	0.00795
Nuclear part	3330	2	7	0.000858	0.0114
Dendrite	342	0.205	3	0.000923	0.0115
Intracellular organelle part	8620	5.17	10	0.00136	0.0161
Organelle part	8790	5.27	10	0.00166	0.0187
Perinuclear region of cytoplasm	475	0.285	3	0.00238	0.0255
Synapse	558	0.335	3	0.00375	0.0384
Neuron projection	685	0.411	3	0.00668	0.0628
Cell projection part	686	0.412	3	0.0067	0.0628
Spindle	261	0.157	2	0.0101	0.091
Transcription factor TFIID complex	21	0.0126	1	0.0125	0.108
Transcription factor complex	303	0.182	2	0.0135	0.112
Protein complex	4050	2.43	6	0.0171	0.138
Intercalated disc	45	0.027	1	0.0267	0.207
Replication fork	50	0.03	1	0.0296	0.216
Cytoplasmic vesicle part	462	0.277	2	0.0298	0.216
Brush border	59	0.0354	1	0.0348	0.245
Macromolecular complex	4800	2.88	6	0.0389	0.265
Microvillus	70	0.042	1	0.0412	0.273
PML body	77	0.0462	1	0.0453	0.287
Cell projection	1410	0.845	3	0.046	0.287
