# Supplementary material for: Integrating Multi-Omics Analysis for Enhanced Diagnosis and Treatment of Glioblastoma: A Comprehensive Data-Driven Approach
Source: Preprints.org preprint supplement (doi:10.20944/preprints202303.0355.v1), 2023-03-20
Supplement: Supplementary file 8 [file Supplementary Table 15.xlsx]

## Sheet: Sheet1
Pathway	Total	Expected	Hits	P.Value	FDR
Mitophagy - animal	65	0.0672	3	3.08e-05	0.00978
Thyroid hormone signaling pathway	116	0.12	3	0.000174	0.0277
Wnt signaling pathway	158	0.163	3	0.000434	0.046
Thyroid cancer	37	0.0383	2	0.000612	0.0486
Endometrial cancer	58	0.06	2	0.0015	0.0938
Basal cell carcinoma	63	0.0651	2	0.00177	0.0938
Adherens junction	72	0.0744	2	0.00231	0.102
Chronic myeloid leukemia	76	0.0786	2	0.00257	0.102
Colorectal cancer	86	0.0889	2	0.00327	0.116
Prostate cancer	97	0.1	2	0.00415	0.132
Cell cycle	124	0.128	2	0.0067	0.194
Measles	138	0.143	2	0.00824	0.204
Fluid shear stress and atherosclerosis	139	0.144	2	0.00836	0.204
Breast cancer	147	0.152	2	0.00931	0.212
Hepatitis C	155	0.16	2	0.0103	0.218
Cellular senescence	160	0.165	2	0.011	0.218
Pathways in cancer	530	0.548	3	0.0138	0.235
Kaposi's sarcoma-associated herpesvirus infection	186	0.192	2	0.0146	0.235
Transcriptional misregulation in cancer	186	0.192	2	0.0146	0.235
Huntington's disease	193	0.2	2	0.0157	0.235
Epstein-Barr virus infection	201	0.208	2	0.017	0.235
Viral carcinogenesis	201	0.208	2	0.017	0.235
Proteoglycans in cancer	201	0.208	2	0.017	0.235
MicroRNAs in cancer	299	0.309	2	0.0357	0.473
Ferroptosis	40	0.0414	1	0.0406	0.509
Bladder cancer	41	0.0424	1	0.0416	0.509
Notch signaling pathway	48	0.0496	1	0.0486	0.572
