# Supplementary material for: Integrating Multi-Omics Analysis for Enhanced Diagnosis and Treatment of Glioblastoma: A Comprehensive Data-Driven Approach
Source: Preprints.org preprint supplement (doi:10.20944/preprints202303.0355.v1), 2023-03-20
Supplement: Supplementary file 9 [file Supplementary Table 16.xlsx]

## Sheet: Sheet1
miEAA - miRNA Enrichment and Annotation -- Analysis results
Category	Subcategory	Enrichment	P-value	P-adjusted	Q-value	Expected	Observed	miRNAs/precursors
Pathways (KEGG)	Fatty acid biosynthesis	over-represented	4.36e-5	0.0078415	0.0078415	0.674619	5	hsa-miR-221-3p; hsa-miR-30a-5p; hsa-miR-15a-5p; hsa-miR-130a-3p; hsa-let-7b-5p
Pathways (KEGG)	Galactose metabolism	over-represented	4.96e-5	0.0078415	0.0078415	0.692217	5	hsa-miR-221-3p; hsa-miR-30a-5p; hsa-miR-15a-5p; hsa-miR-130a-3p; hsa-let-7b-5p
Pathways (KEGG)	Mucin type O-glycan biosynthesis	over-represented	2.22e-4	0.0233921	0.0233921	0.932734	5	hsa-miR-221-3p; hsa-miR-30a-5p; hsa-miR-15a-5p; hsa-miR-130a-3p; hsa-let-7b-5p
Pathways (KEGG)	Malaria	over-represented	3.29e-4	0.0260303	0.0260303	1.00899	5	hsa-miR-221-3p; hsa-miR-30a-5p; hsa-miR-15a-5p; hsa-miR-130a-3p; hsa-let-7b-5p
Pathways (KEGG)	Autophagy - other	over-represented	4.30e-4	0.0264018	0.0264018	1.06375	5	hsa-miR-221-3p; hsa-miR-30a-5p; hsa-miR-15a-5p; hsa-miR-130a-3p; hsa-let-7b-5p
Pathways (KEGG)	Proteasome	over-represented	5.01e-4	0.0264018	0.0264018	1.09699	5	hsa-miR-221-3p; hsa-miR-30a-5p; hsa-miR-15a-5p; hsa-miR-130a-3p; hsa-let-7b-5p
Pathways (KEGG)	Carbohydrate digestion and absorption	over-represented	6.73e-4	0.0281402	0.0281402	1.16347	5	hsa-miR-221-3p; hsa-miR-30a-5p; hsa-miR-15a-5p; hsa-miR-130a-3p; hsa-let-7b-5p
Pathways (KEGG)	Fatty acid degradation	over-represented	8.01e-4	0.0281402	0.0281402	1.20454	5	hsa-miR-221-3p; hsa-miR-30a-5p; hsa-miR-15a-5p; hsa-miR-130a-3p; hsa-let-7b-5p
Pathways (KEGG)	Various types of N-glycan biosynthesis	over-represented	7.63e-4	0.0281402	0.0281402	1.1928	5	hsa-miR-221-3p; hsa-miR-30a-5p; hsa-miR-15a-5p; hsa-miR-130a-3p; hsa-let-7b-5p
Pathways (KEGG)	Phosphonate and phosphinate metabolism	over-represented	0.0011123	0.0319531	0.0319531	0.248338	3	hsa-miR-30a-5p; hsa-miR-15a-5p; hsa-let-7b-5p
Pathways (KEGG)	Riboflavin metabolism	over-represented	0.0010867	0.0319531	0.0319531	0.246382	3	hsa-miR-30a-5p; hsa-miR-15a-5p; hsa-let-7b-5p
Pathways (KEGG)	Cytosolic DNA-sensing pathway	over-represented	0.0015217	0.034346	0.034346	1.36879	5	hsa-miR-221-3p; hsa-miR-30a-5p; hsa-miR-15a-5p; hsa-miR-130a-3p; hsa-let-7b-5p
Pathways (KEGG)	Drug metabolism - other enzymes	over-represented	0.0014469	0.034346	0.034346	1.3551	5	hsa-miR-221-3p; hsa-miR-30a-5p; hsa-miR-15a-5p; hsa-miR-130a-3p; hsa-let-7b-5p
Pathways (KEGG)	Mismatch repair	over-represented	0.0014743	0.034346	0.034346	0.676574	4	hsa-miR-30a-5p; hsa-miR-15a-5p; hsa-miR-130a-3p; hsa-let-7b-5p
Pathways (KEGG)	Endocrine and other factor-regulated calcium reabsorption	over-represented	0.0022831	0.0343549	0.0343549	1.48416	5	hsa-miR-221-3p; hsa-miR-30a-5p; hsa-miR-15a-5p; hsa-miR-130a-3p; hsa-let-7b-5p
Pathways (KEGG)	Ether lipid metabolism	over-represented	0.0020518	0.0343549	0.0343549	1.45287	5	hsa-miR-221-3p; hsa-miR-30a-5p; hsa-miR-15a-5p; hsa-miR-130a-3p; hsa-let-7b-5p
Pathways (KEGG)	Linoleic acid metabolism	over-represented	0.0018542	0.0343549	0.0343549	0.717638	4	hsa-miR-30a-5p; hsa-miR-15a-5p; hsa-miR-130a-3p; hsa-let-7b-5p
Pathways (KEGG)	Mannose type O-glycan biosynthesis	over-represented	0.0020583	0.0343549	0.0343549	0.737192	4	hsa-miR-221-3p; hsa-miR-30a-5p; hsa-miR-15a-5p; hsa-miR-130a-3p
Pathways (KEGG)	N-Glycan biosynthesis	over-represented	0.0021795	0.0343549	0.0343549	1.47047	5	hsa-miR-221-3p; hsa-miR-30a-5p; hsa-miR-15a-5p; hsa-miR-130a-3p; hsa-let-7b-5p
Pathways (KEGG)	Starch and sucrose metabolism	over-represented	0.0017769	0.0343549	0.0343549	0.709816	4	hsa-miR-30a-5p; hsa-miR-15a-5p; hsa-miR-130a-3p; hsa-let-7b-5p
Pathways (KEGG)	alpha-Linolenic acid metabolism	over-represented	0.0020796	0.0343549	0.0343549	0.739147	4	hsa-miR-30a-5p; hsa-miR-15a-5p; hsa-miR-130a-3p; hsa-let-7b-5p
Pathways (KEGG)	African trypanosomiasis	over-represented	0.0029034	0.0363367	0.0363367	0.805632	4	hsa-miR-221-3p; hsa-miR-15a-5p; hsa-miR-130a-3p; hsa-let-7b-5p
Pathways (KEGG)	Ferroptosis	over-represented	0.002862	0.0363367	0.0363367	1.5526	5	hsa-miR-221-3p; hsa-miR-30a-5p; hsa-miR-15a-5p; hsa-miR-130a-3p; hsa-let-7b-5p
Pathways (KEGG)	Other types of O-glycan biosynthesis	over-represented	0.0026178	0.0363367	0.0363367	1.52522	5	hsa-miR-221-3p; hsa-miR-30a-5p; hsa-miR-15a-5p; hsa-miR-130a-3p; hsa-let-7b-5p
Pathways (KEGG)	Sulfur relay system	over-represented	0.0028445	0.0363367	0.0363367	0.342198	3	hsa-miR-30a-5p; hsa-miR-130a-3p; hsa-let-7b-5p
Pathways (KEGG)	Synaptic vesicle cycle	over-represented	0.0029907	0.0363367	0.0363367	1.56629	5	hsa-miR-221-3p; hsa-miR-30a-5p; hsa-miR-15a-5p; hsa-miR-130a-3p; hsa-let-7b-5p
Pathways (KEGG)	Type II diabetes mellitus	over-represented	0.0031047	0.0363367	0.0363367	1.57802	5	hsa-miR-221-3p; hsa-miR-30a-5p; hsa-miR-15a-5p; hsa-miR-130a-3p; hsa-let-7b-5p
Pathways (KEGG)	Aldosterone-regulated sodium reabsorption	over-represented	0.003405	0.0371023	0.0371023	1.60735	5	hsa-miR-221-3p; hsa-miR-30a-5p; hsa-miR-15a-5p; hsa-miR-130a-3p; hsa-let-7b-5p
Pathways (KEGG)	Rheumatoid arthritis	over-represented	0.0033843	0.0371023	0.0371023	1.6054	5	hsa-miR-221-3p; hsa-miR-30a-5p; hsa-miR-15a-5p; hsa-miR-130a-3p; hsa-let-7b-5p
Pathways (KEGG)	Pentose phosphate pathway	over-represented	0.0035494	0.0373866	0.0373866	0.848651	4	hsa-miR-221-3p; hsa-miR-30a-5p; hsa-miR-15a-5p; hsa-let-7b-5p
Pathways (KEGG)	Viral protein interaction with cytokine and cytokine receptor	over-represented	0.0039566	0.0403322	0.0403322	1.65624	5	hsa-miR-221-3p; hsa-miR-30a-5p; hsa-miR-15a-5p; hsa-miR-130a-3p; hsa-let-7b-5p
Pathways (KEGG)	Hematopoietic cell lineage	over-represented	0.0041233	0.0407172	0.0407172	1.66993	5	hsa-miR-221-3p; hsa-miR-30a-5p; hsa-miR-15a-5p; hsa-miR-130a-3p; hsa-let-7b-5p
Pathways (KEGG)	Collecting duct acid secretion	over-represented	0.0045531	0.0435995	0.0435995	0.905358	4	hsa-miR-221-3p; hsa-miR-30a-5p; hsa-miR-130a-3p; hsa-let-7b-5p
Pathways (KEGG)	Neomycin, kanamycin and gentamicin biosynthesis	over-represented	0.0048402	0.0447635	0.0447635	0.113414	2	hsa-miR-30a-5p; hsa-let-7b-5p
Pathways (KEGG)	Notch signaling pathway	over-represented	0.004958	0.0447635	0.0447635	1.7325	5	hsa-miR-221-3p; hsa-miR-30a-5p; hsa-miR-15a-5p; hsa-miR-130a-3p; hsa-let-7b-5p
Pathways (KEGG)	RIG-I-like receptor signaling pathway	over-represented	0.0055142	0.0484023	0.0484023	1.76965	5	hsa-miR-221-3p; hsa-miR-30a-5p; hsa-miR-15a-5p; hsa-miR-130a-3p; hsa-let-7b-5p
