# Supplementary material for: Integrating Multi-Omics Analysis for Enhanced Diagnosis and Treatment of Glioblastoma: A Comprehensive Data-Driven Approach
Source: Preprints.org preprint supplement (doi:10.20944/preprints202303.0355.v1), 2023-03-20
Supplement: Supplementary file 10 [file Supplementary Table 17.xlsx]

## Sheet: Sheet1
	total	expected	hits	Raw p	Holm p	FDR
Aminoacyl-tRNA biosynthesis	48	4.03	20	1.66e-10	1.39e-08	1.39e-08
Arginine biosynthesis	14	1.18	10	9.38e-09	7.78e-07	3.94e-07
Alanine, aspartate and glutamate metabolism	28	2.35	13	7.24e-08	5.94e-06	2.03e-06
Glutathione metabolism	28	2.35	12	7.11e-07	5.76e-05	1.49e-05
Valine, leucine and isoleucine biosynthesis	8	0.672	6	7.65e-06	0.000612	0.000128
Glyoxylate and dicarboxylate metabolism	32	2.69	11	2.7e-05	0.00213	0.000364
Arginine and proline metabolism	38	3.19	12	3.03e-05	0.00236	0.000364
Pyrimidine metabolism	39	3.28	12	4.07e-05	0.00313	0.000427
Butanoate metabolism	15	1.26	7	9.14e-05	0.00695	0.000853
Citrate cycle (TCA cycle)	20	1.68	8	0.000106	0.00797	0.000892
Purine metabolism	65	5.46	15	0.000177	0.0131	0.00136
Glycine, serine and threonine metabolism	33	2.77	10	0.000215	0.0157	0.0015
D-Glutamine and D-glutamate metabolism	6	0.504	4	0.000625	0.045	0.00404
Glycerophospholipid metabolism	36	3.02	9	0.00209	0.149	0.0126
Taurine and hypotaurine metabolism	8	0.672	4	0.00255	0.178	0.0143
Glycolysis / Gluconeogenesis	26	2.18	7	0.00425	0.293	0.0223
Galactose metabolism	27	2.27	7	0.00534	0.363	0.0264
Neomycin, kanamycin and gentamicin biosynthesis	2	0.168	2	0.007	0.469	0.0327
Nitrogen metabolism	6	0.504	3	0.00959	0.633	0.0424
Cysteine and methionine metabolism	33	2.77	7	0.0168	1	0.0687
Pantothenate and CoA biosynthesis	19	1.6	5	0.0172	1	0.0687
Ascorbate and aldarate metabolism	8	0.672	3	0.0237	1	0.0904
Nicotinate and nicotinamide metabolism	15	1.26	4	0.0313	1	0.111
Pyruvate metabolism	22	1.85	5	0.0317	1	0.111
Phenylalanine, tyrosine and tryptophan biosynthesis	4	0.336	2	0.0375	1	0.126
Glycerolipid metabolism	16	1.34	4	0.039	1	0.126
Valine, leucine and isoleucine degradation	40	3.36	7	0.0448	1	0.139
Starch and sucrose metabolism	18	1.51	4	0.0576	1	0.171
Synthesis and degradation of ketone bodies	5	0.42	2	0.0591	1	0.171
beta-Alanine metabolism	21	1.76	4	0.0928	1	0.26
Pentose phosphate pathway	22	1.85	4	0.106	1	0.288
Histidine metabolism	16	1.34	3	0.145	1	0.381
One carbon pool by folate	9	0.756	2	0.171	1	0.435
Phenylalanine metabolism	10	0.84	2	0.202	1	0.5
Glycosylphosphatidylinositol (GPI)-anchor biosynthesis	14	1.18	2	0.331	1	0.795
Amino sugar and nucleotide sugar metabolism	37	3.11	4	0.378	1	0.882
Phosphonate and phosphinate metabolism	6	0.504	1	0.41	1	0.929
Pentose and glucuronate interconversions	18	1.51	2	0.454	1	0.929
Tryptophan metabolism	41	3.44	4	0.456	1	0.929
Thiamine metabolism	7	0.588	1	0.46	1	0.929
Inositol phosphate metabolism	30	2.52	3	0.468	1	0.929
Porphyrin and chlorophyll metabolism	30	2.52	3	0.468	1	0.929
Tyrosine metabolism	42	3.53	4	0.476	1	0.929
Fructose and mannose metabolism	20	1.68	2	0.511	1	0.954
Selenocompound metabolism	20	1.68	2	0.511	1	0.954
Sphingolipid metabolism	21	1.76	2	0.538	1	0.962
Ubiquinone and other terpenoid-quinone biosynthesis	9	0.756	1	0.547	1	0.962
Primary bile acid biosynthesis	46	3.86	4	0.55	1	0.962
Biotin metabolism	10	0.84	1	0.585	1	1
Lysine degradation	25	2.1	2	0.635	1	1
Folate biosynthesis	26	2.18	2	0.657	1	1
Phosphatidylinositol signaling system	28	2.35	2	0.697	1	1
Mannose type O-glycan biosynthesis	16	1.34	1	0.756	1	1
Terpenoid backbone biosynthesis	18	1.51	1	0.796	1	1
Biosynthesis of unsaturated fatty acids	36	3.02	2	0.821	1	1
Ether lipid metabolism	20	1.68	1	0.829	1	1
Fatty acid degradation	39	3.28	2	0.854	1	1
Propanoate metabolism	23	1.93	1	0.869	1	1
Fatty acid biosynthesis	47	3.95	2	0.917	1	1
Fatty acid elongation	38	3.19	1	0.966	1	1
Steroid biosynthesis	42	3.53	1	0.976	1	1
Steroid hormone biosynthesis	85	7.14	1	1	1	1
