# Supplementary material for: Integrating Multi-Omics Analysis for Enhanced Diagnosis and Treatment of Glioblastoma: A Comprehensive Data-Driven Approach
Source: Preprints.org preprint supplement (doi:10.20944/preprints202303.0355.v1), 2023-03-20
Supplement: Supplementary file 11 [file Supplementary Table 18.xlsx]

## Sheet: Sheet1
	total	expected	hits	Raw p	Holm p	FDR
Glutamate Metabolism	49	6.12	24	1.24e-10	1.21e-08	9.34e-09
Urea Cycle	29	3.62	18	1.91e-10	1.85e-08	9.34e-09
Arginine and Proline Metabolism	53	6.62	24	9.91e-10	9.51e-08	3.24e-08
Ammonia Recycling	32	4	17	1.8e-08	1.71e-06	4.42e-07
Glycine and Serine Metabolism	59	7.38	23	8e-08	7.52e-06	1.57e-06
Methionine Metabolism	43	5.38	19	1.16e-07	1.08e-05	1.9e-06
Warburg Effect	58	7.25	22	2.88e-07	2.65e-05	4.03e-06
Phosphatidylcholine Biosynthesis	14	1.75	10	4.34e-07	3.95e-05	5.32e-06
Purine Metabolism	74	9.25	25	5.5e-07	4.95e-05	5.98e-06
Glutathione Metabolism	21	2.62	12	9.79e-07	8.71e-05	9.6e-06
Cysteine Metabolism	26	3.25	13	2.54e-06	0.000224	2.16e-05
Glucose-Alanine Cycle	13	1.62	9	2.65e-06	0.000231	2.16e-05
Aspartate Metabolism	35	4.38	15	4.7e-06	0.000404	3.54e-05
Amino Sugar Metabolism	33	4.12	14	1.17e-05	0.000992	8.17e-05
Pyrimidine Metabolism	59	7.38	19	3.44e-05	0.00289	0.000225
Alanine Metabolism	17	2.12	9	5.77e-05	0.00479	0.000354
Betaine Metabolism	21	2.62	10	7e-05	0.00574	0.000404
Phosphatidylethanolamine Biosynthesis	12	1.5	7	0.000189	0.0153	0.00103
Citric Acid Cycle	32	4	12	0.000219	0.0176	0.00113
Nicotinate and Nicotinamide Metabolism	37	4.62	13	0.000254	0.02	0.00124
Galactose Metabolism	38	4.75	13	0.000345	0.0269	0.00161
Glycolysis	25	3.12	10	0.000416	0.032	0.00185
Gluconeogenesis	35	4.38	12	0.000579	0.044	0.00247
Carnitine Synthesis	22	2.75	9	0.000678	0.0509	0.00266
Transfer of Acetyl Groups into Mitochondria	22	2.75	9	0.000678	0.0509	0.00266
Spermidine and Spermine Biosynthesis	18	2.25	8	0.00071	0.0518	0.00268
Cardiolipin Biosynthesis	11	1.38	6	0.000925	0.0666	0.00336
Butyrate Metabolism	19	2.38	8	0.0011	0.078	0.00371
Ethanol Degradation	19	2.38	8	0.0011	0.078	0.00371
Phenylalanine and Tyrosine Metabolism	28	3.5	10	0.00119	0.0824	0.00378
Selenoamino Acid Metabolism	28	3.5	10	0.00119	0.0824	0.00378
Pyruvate Metabolism	48	6	14	0.00128	0.0856	0.00391
Histidine Metabolism	43	5.38	13	0.00133	0.0877	0.00395
Folate Metabolism	29	3.62	10	0.00163	0.106	0.00459
Lactose Synthesis	20	2.5	8	0.00164	0.106	0.00459
Glycerolipid Metabolism	25	3.12	9	0.002	0.126	0.00544
Pantothenate and CoA Biosynthesis	21	2.62	8	0.00237	0.147	0.00629
Ketone Body Metabolism	13	1.62	6	0.00277	0.169	0.00715
Malate-Aspartate Shuttle	10	1.25	5	0.00423	0.254	0.0106
Mitochondrial Electron Transport Chain	19	2.38	7	0.0056	0.33	0.0137
Beta-Alanine Metabolism	34	4.25	10	0.00613	0.356	0.0147
Methylhistidine Metabolism	4	0.5	3	0.00695	0.396	0.0162
Nucleotide Sugars Metabolism	20	2.5	7	0.00773	0.433	0.0176
Starch and Sucrose Metabolism	31	3.88	9	0.0102	0.56	0.0225
Oxidation of Branched Chain Fatty Acids	26	3.25	8	0.0105	0.569	0.0225
Phytanic Acid Peroxisomal Oxidation	26	3.25	8	0.0105	0.569	0.0225
Valine, Leucine and Isoleucine Degradation	60	7.5	14	0.012	0.622	0.0244
Tryptophan Metabolism	60	7.5	14	0.012	0.622	0.0244
Fructose and Mannose Degradation	32	4	9	0.0127	0.634	0.0254
Beta Oxidation of Very Long Chain Fatty Acids	17	2.12	6	0.0131	0.64	0.0256
Mitochondrial Beta-Oxidation of Long Chain Saturated Fatty Acids	28	3.5	8	0.0169	0.81	0.0324
Phenylacetate Metabolism	9	1.12	4	0.0178	0.835	0.0335
Pentose Phosphate Pathway	29	3.62	8	0.0209	0.962	0.0386
Propanoate Metabolism	42	5.25	10	0.0284	1	0.0516
Threonine and 2-Oxobutanoate Degradation	20	2.5	6	0.0298	1	0.053
Glycerol Phosphate Shuttle	11	1.38	4	0.0381	1	0.0667
Mitochondrial Beta-Oxidation of Short Chain Saturated Fatty Acids	27	3.38	7	0.0417	1	0.0718
Inositol Metabolism	33	4.12	8	0.0439	1	0.0741
Sphingolipid Metabolism	40	5	9	0.0516	1	0.0857
Biotin Metabolism	8	1	3	0.0666	1	0.109
Estrone Metabolism	24	3	6	0.068	1	0.109
Thiamine Metabolism	9	1.12	3	0.091	1	0.139
Lactose Degradation	9	1.12	3	0.091	1	0.139
De Novo Triacylglycerol Biosynthesis	9	1.12	3	0.091	1	0.139
Inositol Phosphate Metabolism	26	3.25	6	0.0944	1	0.142
Tyrosine Metabolism	72	9	13	0.101	1	0.151
Mitochondrial Beta-Oxidation of Medium Chain Saturated Fatty Acids	27	3.38	6	0.109	1	0.16
Pterine Biosynthesis	29	3.62	6	0.143	1	0.203
Phospholipid Biosynthesis	29	3.62	6	0.143	1	0.203
Trehalose Degradation	11	1.38	3	0.149	1	0.208
Phosphatidylinositol Phosphate Metabolism	17	2.12	4	0.153	1	0.211
Fatty acid Metabolism	43	5.38	8	0.157	1	0.214
Lysine Degradation	30	3.75	6	0.161	1	0.217
Androstenedione Metabolism	24	3	5	0.171	1	0.226
Bile Acid Biosynthesis	65	8.12	11	0.177	1	0.231
Taurine and Hypotaurine Metabolism	12	1.5	3	0.181	1	0.233
Plasmalogen Synthesis	26	3.25	5	0.217	1	0.276
Ubiquinone Biosynthesis	20	2.5	4	0.233	1	0.289
Riboflavin Metabolism	20	2.5	4	0.233	1	0.289
Steroid Biosynthesis	48	6	8	0.242	1	0.297
Homocysteine Degradation	9	1.12	2	0.313	1	0.378
Pyruvaldehyde Degradation	10	1.25	2	0.361	1	0.432
Porphyrin Metabolism	40	5	6	0.383	1	0.453
Androgen and Estrogen Metabolism	33	4.12	5	0.397	1	0.463
Fatty Acid Biosynthesis	35	4.38	5	0.45	1	0.518
Catecholamine Biosynthesis	20	2.5	3	0.466	1	0.531
Sulfate/Sulfite Metabolism	22	2.75	3	0.532	1	0.6
Fatty Acid Elongation In Mitochondria	35	4.38	4	0.656	1	0.731
Retinol Metabolism	37	4.62	4	0.701	1	0.771
Vitamin B6 Metabolism	20	2.5	2	0.736	1	0.801
D-Arginine and D-Ornithine Metabolism	11	1.38	1	0.772	1	0.822
Degradation of Superoxides	11	1.38	1	0.772	1	0.822
Steroidogenesis	43	5.38	4	0.808	1	0.852
Caffeine Metabolism	24	3	2	0.824	1	0.852
Thyroid hormone synthesis	13	1.62	1	0.826	1	0.852
Vitamin K Metabolism	14	1.75	1	0.848	1	0.865
Arachidonic Acid Metabolism	69	8.62	4	0.982	1	0.992
