# Supplementary material for: Integrating Multi-Omics Analysis for Enhanced Diagnosis and Treatment of Glioblastoma: A Comprehensive Data-Driven Approach
Source: Preprints.org preprint supplement (doi:10.20944/preprints202303.0355.v1), 2023-03-20
Supplement: Supplementary file 12 [file Supplementary Table 19-KEGG-R-b C.xlsx]

## Sheet: Sheet1
	Total	Expected	Hits	Raw p	Log(p)-negative	Holm adjust	FDR	Impact
Aminoacyl-tRNA biosynthesis	48	3.9019	20	8.9332e-11	10.049	7.5039e-09	7.5039e-09	0.05556
Alanine, aspartate and glutamate metabolism	28	2.2761	14	4.1174e-09	8.3854	3.4174e-07	1.7293e-07	0.81732
Arginine biosynthesis	14	1.1381	10	6.7777e-09	8.1689	5.5577e-07	1.8977e-07	0.6802
Glutathione metabolism	28	2.2761	12	4.948e-07	6.3056	4.0079e-05	1.0391e-05	0.44263
Glyoxylate and dicarboxylate metabolism	32	2.6013	12	2.7642e-06	5.5584	0.00022113	4.6438e-05	0.16138
Valine, leucine and isoleucine biosynthesis	8	0.65032	6	6.2991e-06	5.2007	0.00049763	8.8187e-05	0
Citrate cycle (TCA cycle)	20	1.6258	9	9.1387e-06	5.0391	0.00071282	0.00010966	0.39695
Arginine and proline metabolism	38	3.089	12	2.1641e-05	4.6647	0.0016664	0.00022723	0.53441
Pyrimidine metabolism	39	3.1703	12	2.9115e-05	4.5359	0.0022128	0.00027174	0.47814
Butanoate metabolism	15	1.2194	7	7.3935e-05	4.1312	0.0055451	0.00062105	0.16402
Purine metabolism	65	5.2839	15	0.00012163	3.915	0.0090006	0.00092881	0.37023
Glycine, serine and threonine metabolism	33	2.6826	10	0.00016307	3.7876	0.011904	0.0011415	0.28114
D-Glutamine and D-glutamate metabolism	6	0.48774	4	0.00055015	3.2595	0.039611	0.0035548	0.5
Taurine and hypotaurine metabolism	8	0.65032	4	0.0022552	2.6468	0.16012	0.013531	0.71428
Pyruvate metabolism	22	1.7884	6	0.0064508	2.1904	0.45155	0.034638	0.29859
Glycerophospholipid metabolism	36	2.9265	8	0.0065977	2.1806	0.45524	0.034638	0.27008
Nitrogen metabolism	6	0.48774	3	0.0087454	2.0582	0.59469	0.043213	1
Cysteine and methionine metabolism	33	2.6826	7	0.014179	1.8483	0.95003	0.063813	0.30057
Pantothenate and CoA biosynthesis	19	1.5445	5	0.015053	1.8224	0.99351	0.063813	0.00714
Glycolysis / Gluconeogenesis	26	2.1135	6	0.015194	1.8183	0.99351	0.063813	0.23521
Ascorbate and aldarate metabolism	8	0.65032	3	0.021691	1.6637	1	0.086762	0
Nicotinate and nicotinamide metabolism	15	1.2194	4	0.028084	1.5515	1	0.10723	0.42895
Phenylalanine, tyrosine and tryptophan biosynthesis	4	0.32516	2	0.035281	1.4525	1	0.12885	1
Valine, leucine and isoleucine degradation	40	3.2516	7	0.038425	1.4154	1	0.13449	0.05335
Synthesis and degradation of ketone bodies	5	0.40645	2	0.055703	1.2541	1	0.18716	0.86667
beta-Alanine metabolism	21	1.7071	4	0.084449	1.0734	1	0.27283	0
Histidine metabolism	16	1.3006	3	0.13494	0.86987	1	0.41981	0.22131
Neomycin, kanamycin and gentamicin biosynthesis	2	0.16258	1	0.15602	0.80682	1	0.46806	0
One carbon pool by folate	9	0.73161	2	0.16211	0.79018	1	0.46957	0.80793
Galactose metabolism	27	2.1948	4	0.1711	0.76676	1	0.47907	0.0606
Phenylalanine metabolism	10	0.8129	2	0.19234	0.71594	1	0.52117	0.35714
Pentose phosphate pathway	22	1.7884	3	0.26305	0.57996	1	0.69051	0.17609
Amino sugar and nucleotide sugar metabolism	37	3.0077	4	0.35423	0.45072	1	0.90166	0.13934
Glycerolipid metabolism	16	1.3006	2	0.37826	0.42221	1	0.92108	0.28037
Tryptophan metabolism	41	3.3329	4	0.43074	0.36578	1	0.92108	0.38184
Starch and sucrose metabolism	18	1.4632	2	0.43721	0.35931	1	0.92108	0.14825
Pentose and glucuronate interconversions	18	1.4632	2	0.43721	0.35931	1	0.92108	0.25
Porphyrin and chlorophyll metabolism	30	2.4387	3	0.44611	0.35056	1	0.92108	0.02799
Inositol phosphate metabolism	30	2.4387	3	0.44611	0.35056	1	0.92108	0.20709
Thiamine metabolism	7	0.56903	1	0.44827	0.34846	1	0.92108	0
Tyrosine metabolism	42	3.4142	4	0.44958	0.3472	1	0.92108	0.16435
Selenocompound metabolism	20	1.6258	2	0.49304	0.30712	1	0.98607	0.15909
Sphingolipid metabolism	21	1.7071	2	0.51963	0.28431	1	0.99785	0.03854
Primary bile acid biosynthesis	46	3.7394	4	0.52268	0.28176	1	0.99785	0.07386
Ubiquinone and other terpenoid-quinone biosynthesis	9	0.73161	1	0.53473	0.27187	1	0.99816	0
Biotin metabolism	10	0.8129	1	0.57277	0.24202	1	1	0
Folate biosynthesis	27	2.1948	2	0.65901	0.18111	1	1	0.01193
Phosphatidylinositol signaling system	28	2.2761	2	0.67885	0.16823	1	1	0.13483
Glycosylphosphatidylinositol (GPI)-anchor biosynthesis	14	1.1381	1	0.69645	0.15711	1	1	0
Mannose type O-glycan biosynthesis	17	1.3819	1	0.76523	0.11621	1	1	0
Terpenoid backbone biosynthesis	18	1.4632	1	0.78453	0.10539	1	1	0.08254
Biosynthesis of unsaturated fatty acids	36	2.9265	2	0.80567	0.093841	1	1	0
Ether lipid metabolism	20	1.6258	1	0.81853	0.086967	1	1	0
Fatty acid degradation	39	3.1703	2	0.84047	0.075477	1	1	0
Propanoate metabolism	23	1.8697	1	0.85979	0.065605	1	1	0
Lysine degradation	25	2.0323	1	0.88199	0.054539	1	1	0
Fatty acid biosynthesis	47	3.8206	2	0.90751	0.042147	1	1	0.01473
Fatty acid elongation	39	3.1703	1	0.9649	0.015516	1	1	0
Steroid biosynthesis	42	3.4142	1	0.97298	0.011897	1	1	0.0282
Steroid hormone biosynthesis	85	6.9097	1	0.9994	0.00026065	1	1	0.00528
