# Supplementary material for: Integrating Multi-Omics Analysis for Enhanced Diagnosis and Treatment of Glioblastoma: A Comprehensive Data-Driven Approach
Source: Preprints.org preprint supplement (doi:10.20944/preprints202303.0355.v1), 2023-03-20
Supplement: Supplementary file 13 [file Supplementary Table 2.xlsx]

## Sheet: diamond-glioblastoma
SUID	displayName	name	p_hyper	rank	seed	selected	shared name	type
175469	MCM3	entrez.4172	1.64397e-39	117	FALSE	FALSE	entrez.4172	Gene
175470	MCM4	entrez.4173	6.67374e-39	118	FALSE	FALSE	entrez.4173	Gene
175471	MCM5	entrez.4174	4.82417e-40	116	FALSE	FALSE	entrez.4174	Gene
175472	SMARCA2	entrez.6595	5.44872e-35	137	FALSE	FALSE	entrez.6595	Gene
175473	MCM6	entrez.4175	9.07117e-41	120	FALSE	FALSE	entrez.4175	Gene
175474	SMARCA4	entrez.6597	9.07081e-34	37	FALSE	FALSE	entrez.6597	Gene
175475	KMT2A	entrez.4297	2.14747e-44	96	FALSE	FALSE	entrez.4297	Gene
175476	MCM7	entrez.4176	6.40621e-37	130	FALSE	FALSE	entrez.4176	Gene
175477	CBX4	entrez.8535	2.52785e-44	97	FALSE	FALSE	entrez.8535	Gene
175478	SMARCC1	entrez.6599	2.34456e-34	200	FALSE	FALSE	entrez.6599	Gene
175479	BCHE	entrez.590			TRUE	FALSE	entrez.590	Gene
175480	MCM2	entrez.4171	4.64996e-33	187	FALSE	FALSE	entrez.4171	Gene
175481	XRCC6	entrez.2547	1.13279e-32	158	FALSE	FALSE	entrez.2547	Gene
175482	CCND1	entrez.595	2.90379e-33	161	FALSE	FALSE	entrez.595	Gene
175483	GDNF	entrez.2668			TRUE	FALSE	entrez.2668	Gene
175484	MYC	entrez.4609			TRUE	FALSE	entrez.4609	Gene
175485	CDC42BPG	entrez.55561			TRUE	FALSE	entrez.55561	Gene
175486	ATAD2	entrez.29028	2.76004e-35	136	FALSE	FALSE	entrez.29028	Gene
175487	PRMT5	entrez.10419	1.91004e-34	153	FALSE	FALSE	entrez.10419	Gene
175488	RBBP7	entrez.5931	7.56697e-44	102	FALSE	FALSE	entrez.5931	Gene
175489	RBL1	entrez.5933	3.85535e-34	171	FALSE	FALSE	entrez.5933	Gene
175490	FOXO3	entrez.2309	1.38408e-15	11	FALSE	FALSE	entrez.2309	Gene
175491	MMS22L	entrez.253714	2.48311e-41	78	FALSE	FALSE	entrez.253714	Gene
175492	HIF1A	entrez.3091			TRUE	FALSE	entrez.3091	Gene
175493	PDGFRA	entrez.5156			TRUE	FALSE	entrez.5156	Gene
175494	LTBP4	entrez.8425			TRUE	FALSE	entrez.8425	Gene
175495	H3C14	entrez.126961	1.33113e-44	89	FALSE	FALSE	entrez.126961	Gene
175496	PINK1	entrez.65018			TRUE	FALSE	entrez.65018	Gene
175497	CHD3	entrez.1107	3.14539e-33	198	FALSE	FALSE	entrez.1107	Gene
175498	AR	entrez.367	2.10926e-16	15	FALSE	FALSE	entrez.367	Gene
175499	NOTCH1	entrez.4851			TRUE	FALSE	entrez.4851	Gene
175500	SETDB1	entrez.9869	5.73248e-43	105	FALSE	FALSE	entrez.9869	Gene
175501	SUPT16H	entrez.11198	8.27069e-39	121	FALSE	FALSE	entrez.11198	Gene
175502	UBE2I	entrez.7329	4.11354e-33	174	FALSE	FALSE	entrez.7329	Gene
175503	NOTCH2	entrez.4853			TRUE	FALSE	entrez.4853	Gene
175504	NOTCH3	entrez.4854			TRUE	FALSE	entrez.4854	Gene
175505	INSRR	entrez.3645			TRUE	FALSE	entrez.3645	Gene
175506	CHD4	entrez.1108	2.77243e-36	145	FALSE	FALSE	entrez.1108	Gene
175507	CD9	entrez.928			TRUE	FALSE	entrez.928	Gene
175508	MDM4	entrez.4194			TRUE	FALSE	entrez.4194	Gene
175509	BHLHE40	entrez.8553			TRUE	FALSE	entrez.8553	Gene
175510	PDK2	entrez.5164			TRUE	FALSE	entrez.5164	Gene
175511	NSD2	entrez.7468	2.32082e-38	122	FALSE	FALSE	entrez.7468	Gene
175512	RECK	entrez.8434			TRUE	FALSE	entrez.8434	Gene
175513	H3C15	entrez.333932	1.65682e-44	90	FALSE	FALSE	entrez.333932	Gene
175514	UHRF1	entrez.29128	1.32656e-46	53	FALSE	FALSE	entrez.29128	Gene
175515	KDM1A	entrez.23028	2.06631e-33	199	FALSE	FALSE	entrez.23028	Gene
175516	MDM2	entrez.4193	1.04504e-32	182	FALSE	FALSE	entrez.4193	Gene
175517	IDH1	entrez.3417			TRUE	FALSE	entrez.3417	Gene
175518	PRMT7	entrez.54496	8.10846e-35	139	FALSE	FALSE	entrez.54496	Gene
175519	CHI3L1	entrez.1116			TRUE	FALSE	entrez.1116	Gene
175520	TRIB3	entrez.57761			TRUE	FALSE	entrez.57761	Gene
175521	CSTB	entrez.1476			TRUE	FALSE	entrez.1476	Gene
175522	CSTA	entrez.1475			TRUE	FALSE	entrez.1475	Gene
175523	IRAK1	entrez.3654			TRUE	FALSE	entrez.3654	Gene
175524	POLK	entrez.51426			TRUE	FALSE	entrez.51426	Gene
175525	GATAD2A	entrez.54815	1.02016e-41	108	FALSE	FALSE	entrez.54815	Gene
175526	IDH2	entrez.3418			TRUE	FALSE	entrez.3418	Gene
175527	NPM1	entrez.4869	1.4306e-33	184	FALSE	FALSE	entrez.4869	Gene
175528	PIK3R1	entrez.5295			TRUE	FALSE	entrez.5295	Gene
175529	RELA	entrez.5970	2.89059e-15	9	FALSE	FALSE	entrez.5970	Gene
175530	DYRK2	entrez.8445			TRUE	FALSE	entrez.8445	Gene
175531	PIK3CA	entrez.5290			TRUE	FALSE	entrez.5290	Gene
175532	PIM1	entrez.5292			TRUE	FALSE	entrez.5292	Gene
175533	PARP1	entrez.142	2.70542e-18	20	FALSE	FALSE	entrez.142	Gene
175534	PTEN	entrez.5728			TRUE	FALSE	entrez.5728	Gene
175535	KAT5	entrez.10524	2.7781e-33	38	FALSE	FALSE	entrez.10524	Gene
175536	COPRS	entrez.55352	5.95299e-34	155	FALSE	FALSE	entrez.55352	Gene
175537	FN1	entrez.2335			TRUE	FALSE	entrez.2335	Gene
175538	STYK1	entrez.55359			TRUE	FALSE	entrez.55359	Gene
175539	BAZ1A	entrez.11177	1.80379e-44	62	FALSE	FALSE	entrez.11177	Gene
175540	ORC2	entrez.4999	1.02647e-32	192	FALSE	FALSE	entrez.4999	Gene
175541	HSPA4	entrez.3308	1.92086e-16	7	FALSE	FALSE	entrez.3308	Gene
175542	CUL4A	entrez.8451	7.76255e-33	190	FALSE	FALSE	entrez.8451	Gene
175543	LZTR1	entrez.8216			TRUE	FALSE	entrez.8216	Gene
175544	H2AC4	entrez.8335	5.90092e-41	48	FALSE	FALSE	entrez.8335	Gene
175545	HSP90AA1	entrez.3320	1.01834e-17	2	FALSE	FALSE	entrez.3320	Gene
175546	CDK6	entrez.1021			TRUE	FALSE	entrez.1021	Gene
175547	IFNA2	entrez.3440			TRUE	FALSE	entrez.3440	Gene
175548	PELP1	entrez.27043	6.52889e-43	70	FALSE	FALSE	entrez.27043	Gene
175549	CDK3	entrez.1018			TRUE	FALSE	entrez.1018	Gene
175550	CDK2	entrez.1017			TRUE	FALSE	entrez.1017	Gene
175551	IL2	entrez.3558			TRUE	FALSE	entrez.3558	Gene
175552	STAG2	entrez.10735			TRUE	FALSE	entrez.10735	Gene
175553	CTNNB1	entrez.1499	7.03233e-15	4	FALSE	FALSE	entrez.1499	Gene
175554	IL1B	entrez.3553			TRUE	FALSE	entrez.3553	Gene
175555	NF1	entrez.4763			TRUE	FALSE	entrez.4763	Gene
175556	CHAF1B	entrez.8208	1.12281e-43	83	FALSE	FALSE	entrez.8208	Gene
175557	KAT7	entrez.11143	5.74874e-33	189	FALSE	FALSE	entrez.11143	Gene
175558	DEK	entrez.7913	1.41297e-43	65	FALSE	FALSE	entrez.7913	Gene
175559	RNF2	entrez.6045	9.73001e-33	197	FALSE	FALSE	entrez.6045	Gene
175560	TERT	entrez.7015			TRUE	FALSE	entrez.7015	Gene
175561	BRD2	entrez.6046			TRUE	FALSE	entrez.6046	Gene
175562	MACROH2A1	entrez.9555	1.51554e-37	45	FALSE	FALSE	entrez.9555	Gene
175563	SMARCA5	entrez.8467	1.93005e-43	73	FALSE	FALSE	entrez.8467	Gene
175564	PHF8	entrez.23133	5.3335e-34	146	FALSE	FALSE	entrez.23133	Gene
175565	BRD7	entrez.29117	1.60488e-44	95	FALSE	FALSE	entrez.29117	Gene
175566	PRKN	entrez.5071			TRUE	FALSE	entrez.5071	Gene
175567	WT1	entrez.7490			TRUE	FALSE	entrez.7490	Gene
175568	SUV39H1	entrez.6839	2.49963e-35	144	FALSE	FALSE	entrez.6839	Gene
175569	HSP90AB1	entrez.3326	2.29119e-15	5	FALSE	FALSE	entrez.3326	Gene
175570	HOXA9	entrez.3205	7.74168e-34	191	FALSE	FALSE	entrez.3205	Gene
175571	CHUK	entrez.1147	1.16582e-16	14	FALSE	FALSE	entrez.1147	Gene
175572	CBX7	entrez.23492	1.08673e-43	98	FALSE	FALSE	entrez.23492	Gene
175573	CREBBP	entrez.1387	7.92196e-16	13	FALSE	FALSE	entrez.1387	Gene
175574	FOSL2	entrez.2355			TRUE	FALSE	entrez.2355	Gene
175575	MTOR	entrez.2475			TRUE	FALSE	entrez.2475	Gene
175576	MYOD1	entrez.4654	1.91483e-34	154	FALSE	FALSE	entrez.4654	Gene
175577	H2AC20	entrez.8338	4.41276e-43	68	FALSE	FALSE	entrez.8338	Gene
175578	H4-16	entrez.121504	1.86129e-31	33	FALSE	FALSE	entrez.121504	Gene
175579	PTK2	entrez.5747			TRUE	FALSE	entrez.5747	Gene
175580	HPF1	entrez.54969	1.2538e-46	58	FALSE	FALSE	entrez.54969	Gene
175581	H3C11	entrez.8354	2.47229e-48	55	FALSE	FALSE	entrez.8354	Gene
175582	H3C8	entrez.8355	1.5745e-41	49	FALSE	FALSE	entrez.8355	Gene
175583	SIRT2	entrez.22933	2.93556e-37	128	FALSE	FALSE	entrez.22933	Gene
175584	H3C3	entrez.8352	1.1978e-42	50	FALSE	FALSE	entrez.8352	Gene
175585	H3C6	entrez.8353	3.48301e-47	54	FALSE	FALSE	entrez.8353	Gene
175586	H3C2	entrez.8358			TRUE	FALSE	entrez.8358	Gene
175587	H4C1	entrez.8359	1.19804e-23	26	FALSE	FALSE	entrez.8359	Gene
175588	H3C12	entrez.8356	6.64049e-45	52	FALSE	FALSE	entrez.8356	Gene
175589	H3C10	entrez.8357	5.89223e-35	43	FALSE	FALSE	entrez.8357	Gene
175590	CBX6	entrez.23466	5.23082e-45	91	FALSE	FALSE	entrez.23466	Gene
175591	H3C1	entrez.8350			TRUE	FALSE	entrez.8350	Gene
175592	CBX5	entrez.23468	1.14786e-44	94	FALSE	FALSE	entrez.23468	Gene
175593	H3C4	entrez.8351	4.92165e-36	44	FALSE	FALSE	entrez.8351	Gene
175594	KDM4A	entrez.9682	8.19429e-46	60	FALSE	FALSE	entrez.9682	Gene
175595	KAT14	entrez.57325	2.46449e-35	135	FALSE	FALSE	entrez.57325	Gene
175596	STKLD1	entrez.169436			TRUE	FALSE	entrez.169436	Gene
175597	SFMBT1	entrez.51460	4.45095e-38	126	FALSE	FALSE	entrez.51460	Gene
175598	EGF	entrez.1950			TRUE	FALSE	entrez.1950	Gene
175599	KAT8	entrez.84148	1.05315e-40	110	FALSE	FALSE	entrez.84148	Gene
175600	ZBTB7A	entrez.51341			TRUE	FALSE	entrez.51341	Gene
175601	H2BC12	entrez.85236	8.08905e-34	147	FALSE	FALSE	entrez.85236	Gene
175602	CXCL8	entrez.3576			TRUE	FALSE	entrez.3576	Gene
175603	HEY1	entrez.23462			TRUE	FALSE	entrez.23462	Gene
175604	H2BC21	entrez.8349	9.33891e-48	57	FALSE	FALSE	entrez.8349	Gene
175605	TRIM28	entrez.10155	1.44579e-34	141	FALSE	FALSE	entrez.10155	Gene
175606	NDRG1	entrez.10397			TRUE	FALSE	entrez.10397	Gene
175607	PHF20L1	entrez.51105	8.78303e-43	109	FALSE	FALSE	entrez.51105	Gene
175608	RACK1	entrez.10399	1.00296e-32	186	FALSE	FALSE	entrez.10399	Gene
175609	CHAF1A	entrez.10036	7.52782e-44	85	FALSE	FALSE	entrez.10036	Gene
175610	EGFR	entrez.1956			TRUE	FALSE	entrez.1956	Gene
175611	CBX1	entrez.10951	6.04461e-41	81	FALSE	FALSE	entrez.10951	Gene
175612	H4C8	entrez.8365	7.94989e-26	28	FALSE	FALSE	entrez.8365	Gene
175613	H4C2	entrez.8366	1.95523e-19	22	FALSE	FALSE	entrez.8366	Gene
175614	TOP2A	entrez.7153	3.00727e-33	177	FALSE	FALSE	entrez.7153	Gene
175615	H4C11	entrez.8363	1.30143e-32	34	FALSE	FALSE	entrez.8363	Gene
175616	RAD51B	entrez.5890	4.18868e-33	157	FALSE	FALSE	entrez.5890	Gene
175617	H4C3	entrez.8364	1.62144e-21	24	FALSE	FALSE	entrez.8364	Gene
175618	TP53BP1	entrez.7158	3.41369e-33	167	FALSE	FALSE	entrez.7158	Gene
175619	TP53	entrez.7157	1.29504e-32	163	FALSE	FALSE	entrez.7157	Gene
175620	H4C5	entrez.8367	6.23388e-27	29	FALSE	FALSE	entrez.8367	Gene
175621	ANP32A	entrez.8125	3.64233e-37	129	FALSE	FALSE	entrez.8125	Gene
175622	H4C13	entrez.8368	2.60508e-30	32	FALSE	FALSE	entrez.8368	Gene
175623	BRD4	entrez.23476			TRUE	FALSE	entrez.23476	Gene
175624	JAG1	entrez.182			TRUE	FALSE	entrez.182	Gene
175625	H4C6	entrez.8361	4.77078e-28	30	FALSE	FALSE	entrez.8361	Gene
175626	H4C12	entrez.8362	1.41327e-22	25	FALSE	FALSE	entrez.8362	Gene
175627	H4C4	entrez.8360	2.05035e-18	21	FALSE	FALSE	entrez.8360	Gene
175628	PHF20	entrez.51230	2.94169e-40	111	FALSE	FALSE	entrez.51230	Gene
175629	GATAD2B	entrez.57459	7.53963e-41	107	FALSE	FALSE	entrez.57459	Gene
175630	RUNX1	entrez.861			TRUE	FALSE	entrez.861	Gene
175631	TRIM33	entrez.51592			TRUE	FALSE	entrez.51592	Gene
175632	CDK1	entrez.983	1.10676e-33	168	FALSE	FALSE	entrez.983	Gene
175633	CBX8	entrez.57332	2.67059e-42	104	FALSE	FALSE	entrez.57332	Gene
175634	H4C15	entrez.554313	1.80739e-20	23	FALSE	FALSE	entrez.554313	Gene
175635	RUNX3	entrez.864			TRUE	FALSE	entrez.864	Gene
175636	SRPK2	entrez.6733			TRUE	FALSE	entrez.6733	Gene
175637	TONSL	entrez.4796	7.85968e-43	71	FALSE	FALSE	entrez.4796	Gene
175638	MMP2	entrez.4313			TRUE	FALSE	entrez.4313	Gene
175639	NASP	entrez.4678	2.99738e-43	100	FALSE	FALSE	entrez.4678	Gene
175640	DUSP6	entrez.1848			TRUE	FALSE	entrez.1848	Gene
175641	MMP9	entrez.4318			TRUE	FALSE	entrez.4318	Gene
175642	RPS6KA3	entrez.6197			TRUE	FALSE	entrez.6197	Gene
175643	TAF1	entrez.6872	9.14217e-40	113	FALSE	FALSE	entrez.6872	Gene
175644	PRKD3	entrez.23683			TRUE	FALSE	entrez.23683	Gene
175645	EP300	entrez.2033	5.53766e-15	8	FALSE	FALSE	entrez.2033	Gene
175646	TP73	entrez.7161	1.1259e-34	169	FALSE	FALSE	entrez.7161	Gene
175647	H4C14	entrez.8370	3.56595e-29	31	FALSE	FALSE	entrez.8370	Gene
175648	NOC2L	entrez.26155	2.86586e-32	179	FALSE	FALSE	entrez.26155	Gene
175649	CENPA	entrez.1058	1.5152e-42	72	FALSE	FALSE	entrez.1058	Gene
175650	EZH2	entrez.2146	8.61637e-16	10	FALSE	FALSE	entrez.2146	Gene
175651	RAG1	entrez.5896	1.98815e-45	61	FALSE	FALSE	entrez.5896	Gene
175652	EHMT1	entrez.79813	1.99345e-33	150	FALSE	FALSE	entrez.79813	Gene
175653	HDAC6	entrez.10013	1.40589e-33	176	FALSE	FALSE	entrez.10013	Gene
175654	MECP2	entrez.4204	2.17013e-38	124	FALSE	FALSE	entrez.4204	Gene
175655	MTA2	entrez.9219	1.1428e-34	142	FALSE	FALSE	entrez.9219	Gene
175656	ASF1B	entrez.55723	5.15121e-45	86	FALSE	FALSE	entrez.55723	Gene
175657	DYRK1A	entrez.1859	6.51116e-33	172	FALSE	FALSE	entrez.1859	Gene
175658	DAXX	entrez.1616			TRUE	FALSE	entrez.1616	Gene
175659	HDAC5	entrez.10014	2.18033e-35	143	FALSE	FALSE	entrez.10014	Gene
175660	SSRP1	entrez.6749	5.25337e-40	119	FALSE	FALSE	entrez.6749	Gene
175661	TRIM24	entrez.8805	5.635e-42	106	FALSE	FALSE	entrez.8805	Gene
175662	MTA1	entrez.9112	1.37125e-33	149	FALSE	FALSE	entrez.9112	Gene
175663	MEN1	entrez.4221	1.18246e-40	114	FALSE	FALSE	entrez.4221	Gene
175664	NSD1	entrez.64324	3.20508e-39	125	FALSE	FALSE	entrez.64324	Gene
175665	TAF15	entrez.8148	1.23154e-36	132	FALSE	FALSE	entrez.8148	Gene
175666	H2AC8	entrez.3012	2.52757e-39	47	FALSE	FALSE	entrez.3012	Gene
175667	TWIST1	entrez.7291	9.0035e-34	166	FALSE	FALSE	entrez.7291	Gene
175668	UHRF2	entrez.115426	6.14629e-34	164	FALSE	FALSE	entrez.115426	Gene
175669	HIRA	entrez.7290	1.96214e-43	88	FALSE	FALSE	entrez.7290	Gene
175670	TGM2	entrez.7052			TRUE	FALSE	entrez.7052	Gene
175671	MSL3	entrez.10943	2.53021e-44	63	FALSE	FALSE	entrez.10943	Gene
175672	H1-5	entrez.3009	7.34048e-34	156	FALSE	FALSE	entrez.3009	Gene
175673	CTNND2	entrez.1501			TRUE	FALSE	entrez.1501	Gene
175674	L3MBTL2	entrez.83746	1.13217e-37	127	FALSE	FALSE	entrez.83746	Gene
175675	GSTT1	entrez.2952			TRUE	FALSE	entrez.2952	Gene
175676	H1-2	entrez.3006	1.52342e-33	195	FALSE	FALSE	entrez.3006	Gene
175677	BMI1	entrez.648			TRUE	FALSE	entrez.648	Gene
175678	CTSB	entrez.1508			TRUE	FALSE	entrez.1508	Gene
175679	BRPF1	entrez.7862	2.18485e-46	93	FALSE	FALSE	entrez.7862	Gene
175680	MET	entrez.4233			TRUE	FALSE	entrez.4233	Gene
175681	STAT3	entrez.6774	1.22307e-18	3	FALSE	FALSE	entrez.6774	Gene
175682	H1-1	entrez.3024	4.05267e-33	185	FALSE	FALSE	entrez.3024	Gene
175683	FANCD2	entrez.2177	3.62453e-39	115	FALSE	FALSE	entrez.2177	Gene
175684	TES	entrez.26136			TRUE	FALSE	entrez.26136	Gene
175685	ASF1A	entrez.25842	1.23138e-45	87	FALSE	FALSE	entrez.25842	Gene
175686	H3-3B	entrez.3021	3.50527e-35	41	FALSE	FALSE	entrez.3021	Gene
175687	H3-3A	entrez.3020			TRUE	FALSE	entrez.3020	Gene
175688	EPHB6	entrez.2051			TRUE	FALSE	entrez.2051	Gene
175689	CCNA2	entrez.890	1.72657e-34	165	FALSE	FALSE	entrez.890	Gene
175690	CTSK	entrez.1513			TRUE	FALSE	entrez.1513	Gene
175691	H2BC3	entrez.3018	4.94388e-39	46	FALSE	FALSE	entrez.3018	Gene
175692	SHPRH	entrez.257218	3.93253e-36	134	FALSE	FALSE	entrez.257218	Gene
175693	IPO4	entrez.79711	8.29098e-43	103	FALSE	FALSE	entrez.79711	Gene
175694	H2AX	entrez.3014			TRUE	FALSE	entrez.3014	Gene
175695	CCNE1	entrez.898	8.32003e-36	170	FALSE	FALSE	entrez.898	Gene
175696	L3MBTL1	entrez.26013	3.38086e-37	131	FALSE	FALSE	entrez.26013	Gene
175697	HDAC8	entrez.55869	3.10667e-42	75	FALSE	FALSE	entrez.55869	Gene
175698	PKM	entrez.5315	3.03755e-19	1	FALSE	FALSE	entrez.5315	Gene
175699	LBR	entrez.3930	3.32714e-36	133	FALSE	FALSE	entrez.3930	Gene
175700	NLK	entrez.51701			TRUE	FALSE	entrez.51701	Gene
175701	TAF1B	entrez.9014	8.24869e-45	69	FALSE	FALSE	entrez.9014	Gene
175702	SEPTIN14	entrez.346288			TRUE	FALSE	entrez.346288	Gene
175703	TAF1A	entrez.9015	2.67199e-38	123	FALSE	FALSE	entrez.9015	Gene
175704	LMNA	entrez.4000	2.48618e-33	196	FALSE	FALSE	entrez.4000	Gene
175705	KAT6A	entrez.7994	1.61239e-46	59	FALSE	FALSE	entrez.7994	Gene
175706	PROM1	entrez.8842			TRUE	FALSE	entrez.8842	Gene
175707	HDAC3	entrez.8841	4.05347e-16	17	FALSE	FALSE	entrez.8841	Gene
175708	PBRM1	entrez.55193	1.98112e-41	77	FALSE	FALSE	entrez.55193	Gene
175709	PRMT1	entrez.3276	1.27197e-32	193	FALSE	FALSE	entrez.3276	Gene
175710	BPTF	entrez.2186	1.51316e-43	66	FALSE	FALSE	entrez.2186	Gene
175711	ERBB2	entrez.2064			TRUE	FALSE	entrez.2064	Gene
175712	EHMT2	entrez.10919	1.86643e-34	151	FALSE	FALSE	entrez.10919	Gene
175713	RPS6KA5	entrez.9252	2.57193e-33	35	FALSE	FALSE	entrez.9252	Gene
175714	CBX2	entrez.84733	5.22499e-44	64	FALSE	FALSE	entrez.84733	Gene
175715	ATRX	entrez.546			TRUE	FALSE	entrez.546	Gene
175716	AKT3	entrez.10000			TRUE	FALSE	entrez.10000	Gene
175717	MAPKAPK3	entrez.7867			TRUE	FALSE	entrez.7867	Gene
175718	SET	entrez.6418	4.07621e-32	181	FALSE	FALSE	entrez.6418	Gene
175719	CBX3	entrez.11335	1.34e-44	84	FALSE	FALSE	entrez.11335	Gene
175720	TAF1L	entrez.138474			TRUE	FALSE	entrez.138474	Gene
175721	XPC	entrez.7508	1.78598e-33	159	FALSE	FALSE	entrez.7508	Gene
175722	HES1	entrez.3280			TRUE	FALSE	entrez.3280	Gene
175723	KAT2B	entrez.8850	1.78581e-17	19	FALSE	FALSE	entrez.8850	Gene
175724	XRCC5	entrez.7520	9.7323e-34	175	FALSE	FALSE	entrez.7520	Gene
175725	MGMT	entrez.4255			TRUE	FALSE	entrez.4255	Gene
175726	H3-4	entrez.8290	2.39741e-33	36	FALSE	FALSE	entrez.8290	Gene
175727	FAT1	entrez.2195			TRUE	FALSE	entrez.2195	Gene
175728	ERCC6	entrez.2074	8.58487e-42	76	FALSE	FALSE	entrez.2074	Gene
175729	H4C9	entrez.8294	9.88676e-25	27	FALSE	FALSE	entrez.8294	Gene
175730	BRCA1	entrez.672	1.56697e-34	140	FALSE	FALSE	entrez.672	Gene
175731	GUCY2F	entrez.2986			TRUE	FALSE	entrez.2986	Gene
175732	HSPB8	entrez.26353			TRUE	FALSE	entrez.26353	Gene
175733	KMT5A	entrez.387893	8.4621e-33	173	FALSE	FALSE	entrez.387893	Gene
175734	PRKCA	entrez.5578			TRUE	FALSE	entrez.5578	Gene
175735	H3C7	entrez.8968	8.98174e-44	51	FALSE	FALSE	entrez.8968	Gene
175736	EED	entrez.8726	4.84182e-35	138	FALSE	FALSE	entrez.8726	Gene
175737	PRKCB	entrez.5579			TRUE	FALSE	entrez.5579	Gene
175738	JAG2	entrez.3714			TRUE	FALSE	entrez.3714	Gene
175739	PRKDC	entrez.5591	2.39051e-17	16	FALSE	FALSE	entrez.5591	Gene
175740	ERN1	entrez.2081			TRUE	FALSE	entrez.2081	Gene
175741	SIK1	entrez.150094			TRUE	FALSE	entrez.150094	Gene
175742	PCNA	entrez.5111	7.55589e-33	160	FALSE	FALSE	entrez.5111	Gene
175743	TNFSF10	entrez.8743			TRUE	FALSE	entrez.8743	Gene
175744	YWHAZ	entrez.7534	2.36512e-32	194	FALSE	FALSE	entrez.7534	Gene
175745	SIRT1	entrez.23411	2.8777e-16	12	FALSE	FALSE	entrez.23411	Gene
175746	DNMT3A	entrez.1788	3.0089e-34	152	FALSE	FALSE	entrez.1788	Gene
175747	DNMT1	entrez.1786	9.18259e-17	18	FALSE	FALSE	entrez.1786	Gene
175748	APC	entrez.324			TRUE	FALSE	entrez.324	Gene
175749	PARP10	entrez.84875	3.92082e-48	56	FALSE	FALSE	entrez.84875	Gene
175750	AKT1	entrez.207	6.60174e-16	6	FALSE	FALSE	entrez.207	Gene
175751	JUN	entrez.3725	7.1615e-33	188	FALSE	FALSE	entrez.3725	Gene
175752	VEGFA	entrez.7422			TRUE	FALSE	entrez.7422	Gene
175753	HDGF	entrez.3068	2.04345e-34	148	FALSE	FALSE	entrez.3068	Gene
175754	ESR1	entrez.2099	4.4324e-33	183	FALSE	FALSE	entrez.2099	Gene
175755	HDAC2	entrez.3066	4.17868e-43	74	FALSE	FALSE	entrez.3066	Gene
175756	EID1	entrez.23741	3.70891e-42	80	FALSE	FALSE	entrez.23741	Gene
175757	HDAC1	entrez.3065	1.77519e-34	40	FALSE	FALSE	entrez.3065	Gene
175758	H3C13	entrez.653604	5.73914e-46	92	FALSE	FALSE	entrez.653604	Gene
175759	KMT5C	entrez.84787	3.46921e-32	180	FALSE	FALSE	entrez.84787	Gene
175760	MAPK8	entrez.5599			TRUE	FALSE	entrez.5599	Gene
175761	KAT2A	entrez.2648	3.40775e-41	79	FALSE	FALSE	entrez.2648	Gene
175762	PML	entrez.5371			TRUE	FALSE	entrez.5371	Gene
175763	WDR5	entrez.11091	9.65895e-40	112	FALSE	FALSE	entrez.11091	Gene
175764	COMMD3-BMI1	entrez.100532731	1.43904e-43	99	FALSE	FALSE	entrez.100532731	Gene
175765	HAT1	entrez.8520	7.65986e-44	101	FALSE	FALSE	entrez.8520	Gene
175766	NCOR1	entrez.9611			TRUE	FALSE	entrez.9611	Gene
175767	SUZ12	entrez.23512			TRUE	FALSE	entrez.23512	Gene
175768	ARID4A	entrez.5926	8.94823e-34	162	FALSE	FALSE	entrez.5926	Gene
175769	RBBP4	entrez.5928	7.08525e-42	82	FALSE	FALSE	entrez.5928	Gene
175770	ING2	entrez.3622	1.94041e-32	178	FALSE	FALSE	entrez.3622	Gene
175771	SETD7	entrez.80854	2.05046e-35	42	FALSE	FALSE	entrez.80854	Gene
175772	NSD3	entrez.54904	2.36412e-43	67	FALSE	FALSE	entrez.54904	Gene
175773	RB1	entrez.5925	1.68737e-34	39	FALSE	FALSE	entrez.5925	Gene
