# Supplementary material for: Integrating Multi-Omics Analysis for Enhanced Diagnosis and Treatment of Glioblastoma: A Comprehensive Data-Driven Approach
Source: Preprints.org preprint supplement (doi:10.20944/preprints202303.0355.v1), 2023-03-20
Supplement: Supplementary file 15 [file Supplementary Table 21 -SMPDB-R-b C.xlsx]

## Sheet: Sheet1
	Total	Expected	Hits	Raw p	#NAME?	Holm adjust	FDR	Impact
Arginine and Proline Metabolism	48	5.4708	18	1.1555e-06	5.9372	0.0001144	5.839e-05	0.44107
Methionine Metabolism	39	4.445	16	1.1796e-06	5.9283	0.0001156	5.839e-05	0.32086
Ammonia Recycling	25	2.8494	12	3.9946e-06	5.3985	0.00038747	0.00011577	0.41671
Phosphatidylcholine Biosynthesis	18	2.0515	10	5.0677e-06	5.2952	0.0004865	0.00011577	0.26829
Purine Metabolism	63	7.1804	20	5.8468e-06	5.2331	0.00055545	0.00011577	0.36548
Urea Cycle	23	2.6214	11	1.1007e-05	4.9583	0.0010346	0.00014211	0.4947
Glutamate Metabolism	45	5.1288	16	1.1105e-05	4.9545	0.0010346	0.00014211	0.32561
Glycine and Serine Metabolism	50	5.6987	17	1.1484e-05	4.9399	0.0010565	0.00014211	0.20531
Pyrimidine Metabolism	54	6.1546	17	3.6868e-05	4.4334	0.003355	0.00040555	0.54512
Carnitine Synthesis	16	1.8236	8	0.00013235	3.8783	0.011912	0.0013103	0
Warburg Effect	49	5.5847	15	0.00016067	3.7941	0.014299	0.001446	0.41342
Phosphatidylethanolamine Biosynthesis	13	1.4817	7	0.00020082	3.6972	0.017672	0.0016568	0
Citric Acid Cycle	26	2.9633	10	0.00027564	3.5597	0.023981	0.0020991	0.37081
Galactose Metabolism	31	3.5332	11	0.00030842	3.5109	0.026524	0.0021809	0.024845
Betaine Metabolism	18	2.0515	8	0.0003689	3.4331	0.031356	0.0024347	0.39144
Aspartate Metabolism	34	3.8751	11	0.00077091	3.113	0.063985	0.0044894	0.8
Starch and Sucrose Metabolism	26	2.9633	9	0.001392	2.8564	0.11414	0.0072668	0.13959
Amino Sugar Metabolism	31	3.5332	10	0.0013946	2.8555	0.11414	0.0072668	0.13381
Oxidation of Branched Chain Fatty Acids	22	2.5074	8	0.0018133	2.7415	0.14506	0.0089757	0
Transfer of Acetyl Groups into Mitochondria	18	2.0515	7	0.0022782	2.6424	0.17998	0.010641	0.52261
Glycerolipid Metabolism	23	2.6214	8	0.0025184	2.5989	0.19644	0.010641	0.441
Spermidine and Spermine Biosynthesis	14	1.5956	6	0.0026872	2.5707	0.20692	0.010641	0.57143
Lactose Synthesis	14	1.5956	6	0.0026872	2.5707	0.20692	0.010641	0.59559
Alanine Metabolism	14	1.5956	6	0.0026872	2.5707	0.20692	0.010641	1
Pantothenate and CoA Biosynthesis	19	2.1655	7	0.0032706	2.4854	0.24203	0.011992	0.068702
Glutathione Metabolism	19	2.1655	7	0.0032706	2.4854	0.24203	0.011992	0.29975
Folate Metabolism	24	2.7354	8	0.0034221	2.4657	0.24639	0.0121	0.40228
Histidine Metabolism	35	3.9891	10	0.0038692	2.4124	0.27471	0.013128	0.23416
Mitochondrial Electron Transport Chain	15	1.7096	6	0.0040664	2.3908	0.28465	0.013128	0.36958
Malate-Aspartate Shuttle	7	0.79782	4	0.0042744	2.3691	0.29493	0.013128	0.71429
Gluconeogenesis	30	3.4192	9	0.0042804	2.3685	0.29493	0.013128	0.1871
Phenylalanine and Tyrosine Metabolism	25	2.8494	8	0.0045593	2.3411	0.30547	0.013128	0.22124
Glycolysis	20	2.2795	7	0.0045628	2.3408	0.30547	0.013128	0.24702
Cardiolipin Biosynthesis	11	1.2537	5	0.0046412	2.3334	0.30547	0.013128	0.35065
Butyrate Metabolism	16	1.8236	6	0.0059083	2.2285	0.37222	0.015147	0.19531
Nucleotide Sugars Metabolism	16	1.8236	6	0.0059083	2.2285	0.37222	0.015147	0.51724
Beta-Alanine Metabolism	26	2.9633	8	0.005967	2.2242	0.37222	0.015147	0.19008
Threonine and 2-Oxobutanoate Degradation	13	1.4817	5	0.010707	1.9703	0.63171	0.025853	0
Glucose-Alanine Cycle	9	1.0258	4	0.012818	1.8922	0.74343	0.030213	0.5625
Phytanic Acid Peroxisomal Oxidation	19	2.1655	6	0.015007	1.8237	0.85541	0.034551	0
Ethanol Degradation	15	1.7096	5	0.02071	1.6838	1	0.046599	0.037879
Nicotinate and Nicotinamide Metabolism	32	3.6472	8	0.022278	1.6521	1	0.049012	0.36223
Valine, Leucine and Isoleucine Degradation	51	5.8127	11	0.023369	1.6314	1	0.050294	0.14836
Pentose Phosphate Pathway	27	3.0773	7	0.026459	1.5774	1	0.055734	0.082111
Fructose and Mannose Degradation	28	3.1913	7	0.03203	1.4944	1	0.066061	0.18715
Biotin Metabolism	7	0.79782	3	0.035824	1.4458	1	0.07238	0
Tyrosine Metabolism	55	6.2686	11	0.039407	1.4044	1	0.076496	0.096775
Tryptophan Metabolism	55	6.2686	11	0.039407	1.4044	1	0.076496	0.13657
Sphingolipid Metabolism	36	4.1031	8	0.043368	1.3628	1	0.082567	0.22309
Mitochondrial Beta-Oxidation of Long Chain Saturated Fatty Acids	24	2.7354	6	0.046246	1.3349	1	0.086385	0.060329
Pyruvate Metabolism	37	4.217	8	0.050202	1.2993	1	0.091234	0.42281
Beta Oxidation of Very Long Chain Fatty Acids	13	1.4817	4	0.050685	1.2951	1	0.091234	0.049458
Bile Acid Biosynthesis	59	6.7245	11	0.06194	1.208	1	0.1095	0.22932
Phosphatidylinositol Phosphate Metabolism	14	1.5956	4	0.064895	1.1878	1	0.11271	0.43089
Estrone Metabolism	20	2.2795	5	0.067229	1.1724	1	0.11475	0.15982
Selenoamino Acid Metabolism	28	3.1913	6	0.08881	1.0515	1	0.14654	0
Inositol Metabolism	28	3.1913	6	0.08881	1.0515	1	0.14654	0.4071
Porphyrin Metabolism	36	4.1031	7	0.10494	0.97907	1	0.16756	0.043956
Androstenedione Metabolism	23	2.6214	5	0.11086	0.95524	1	0.1742	0.23493
Mitochondrial Beta-Oxidation of Short Chain Saturated Fatty Acids	17	1.9376	4	0.11831	0.92699	1	0.183	0.08
Trehalose Degradation	11	1.2537	3	0.12051	0.91898	1	0.18355	0.84211
Ubiquinone Biosynthesis	18	2.0515	4	0.13934	0.85593	1	0.20901	0
Phospholipid Biosynthesis	25	2.8494	5	0.14598	0.8357	1	0.21571	0.1794
Homocysteine Degradation	7	0.79782	2	0.18492	0.73302	1	0.26598	0
Lysine Degradation	20	2.2795	4	0.18538	0.73193	1	0.26598	0.093333
Catecholamine Biosynthesis	14	1.5956	3	0.20763	0.6827	1	0.28813	0
Riboflavin Metabolism	14	1.5956	3	0.20763	0.6827	1	0.28813	0
Steroid Biosynthesis	43	4.9009	7	0.20955	0.67871	1	0.28813	0.30477
Androgen and Estrogen Metabolism	29	3.3053	5	0.22795	0.64216	1	0.3023	0.10396
Phenylacetate Metabolism	8	0.91179	2	0.22901	0.64014	1	0.3023	0
Glycerol Phosphate Shuttle	8	0.91179	2	0.22901	0.64014	1	0.3023	0.7619
Inositol Phosphate Metabolism	22	2.5074	4	0.23562	0.62778	1	0.30693	0.37157
Taurine and Hypotaurine Metabolism	9	1.0258	2	0.27372	0.5627	1	0.33873	0
Thiamine Metabolism	9	1.0258	2	0.27372	0.5627	1	0.33873	0
Lactose Degradation	9	1.0258	2	0.27372	0.5627	1	0.33873	0
De Novo Triacylglycerol Biosynthesis	9	1.0258	2	0.27372	0.5627	1	0.33873	0.2
Fatty Acid Metabolism	40	4.559	6	0.30015	0.52267	1	0.36685	0.29167
Pterine Biosynthesis	18	2.0515	3	0.33765	0.47153	1	0.40765	0.20942
Sulfate/Sulfite Metabolism	19	2.1655	3	0.37063	0.43106	1	0.44208	0
Mitochondrial Beta-Oxidation of Medium Chain Saturated Fatty Acids	22	2.5074	3	0.4671	0.33059	1	0.55051	0.15
Plasmalogen Synthesis	16	1.8236	2	0.56062	0.25133	1	0.65295	0
Pyruvaldehyde Degradation	7	0.79782	1	0.57248	0.24224	1	0.65902	0
Vitamin K Metabolism	9	1.0258	1	0.66503	0.17716	1	0.75675	0
Retinol Metabolism	30	3.4192	3	0.68434	0.16473	1	0.76989	0.081912
Steroidogenesis	42	4.7869	4	0.72589	0.13913	1	0.79848	0.16166
Fatty Acid Biosynthesis	33	3.7611	3	0.74687	0.12676	1	0.80369	0.050764
Fatty Acid Elongation In Mitochondria	33	3.7611	3	0.74687	0.12676	1	0.80369	0.41096
Vitamin B6 Metabolism	15	1.7096	1	0.83937	0.076046	1	0.89352	0
Caffeine Metabolism	20	2.2795	1	0.91325	0.039409	1	0.96183	0.25
Arachidonic Acid Metabolism	65	7.4083	2	0.99709	0.0012648	1	1	0
