# Supplementary material for: Integrating Multi-Omics Analysis for Enhanced Diagnosis and Treatment of Glioblastoma: A Comprehensive Data-Driven Approach
Source: Preprints.org preprint supplement (doi:10.20944/preprints202303.0355.v1), 2023-03-20
Supplement: Supplementary file 19 [file Supplementary Table 25 -Joint pathway-closeness.xlsx]

## Sheet: MetaboAnalyst_result_pathway (1
	Total	Expected	Hits	Raw p	#NAME?	Holm adjust	FDR	Impact
Central carbon metabolism in cancer	106	1.3918	28	2.0801e-29	28.682	6.8851e-27	6.8851e-27	0.32503
ABC transporters	183	2.4028	33	9.7827e-29	28.01	3.2283e-26	1.619e-26	0.2
Protein digestion and absorption	142	1.8645	24	2.6161e-20	19.582	8.607e-18	2.8864e-18	0.26027
Aminoacyl-tRNA biosynthesis	118	1.5493	20	4.3419e-17	16.362	1.4241e-14	3.5929e-15	0.20964
Alanine, aspartate and glutamate metabolism	64	0.84032	14	6.6463e-14	13.177	2.1733e-11	4.3998e-12	0.3657
Arginine biosynthesis	44	0.57772	11	7.2907e-12	11.137	2.3768e-09	4.022e-10	0.87633
Glyoxylate and dicarboxylate metabolism	92	1.208	14	1.2788e-11	10.893	4.156e-09	6.0467e-10	0.20683
Mineral absorption	87	1.1423	13	9.0386e-11	10.044	2.9285e-08	3.7397e-09	0.046512
Glycine, serine and threonine metabolism	90	1.1817	13	1.4036e-10	9.8528	4.5335e-08	5.162e-09	0.36751
Taurine and hypotaurine metabolism	33	0.43329	9	2.6828e-10	9.5714	8.6387e-08	8.8801e-09	0.3389
Glutathione metabolism	94	1.2342	12	3.188e-09	8.4965	1.0234e-06	9.593e-08	0.3552
Pyrimidine metabolism	122	1.6019	13	6.5498e-09	8.1838	2.0959e-06	1.8067e-07	0.34091
Citrate cycle (TCA cycle)	50	0.6565	9	1.4416e-08	7.8411	4.5988e-06	3.6706e-07	1.3489
Cysteine and methionine metabolism	112	1.4706	12	2.4091e-08	7.6181	7.6609e-06	5.6958e-07	0.20143
Purine metabolism	225	2.9543	16	3.9713e-08	7.4011	1.2589e-05	8.6118e-07	0.28235
Valine, leucine and isoleucine biosynthesis	27	0.35451	7	4.1628e-08	7.3806	1.3154e-05	8.6118e-07	0.27667
Arginine and proline metabolism	128	1.6806	12	1.0813e-07	6.9661	3.406e-05	2.1053e-06	0.23228
Butanoate metabolism	70	0.9191	9	2.9939e-07	6.5238	9.401e-05	5.5055e-06	0.18442
Antifolate resistance	59	0.77467	8	9.2107e-07	6.0357	0.00028829	1.6046e-05	0.16393
Pyruvate metabolism	70	0.9191	8	3.4716e-06	5.4595	0.0010832	5.7456e-05	0.50281
Ferroptosis	71	0.93223	8	3.8694e-06	5.4124	0.0012034	6.099e-05	0.13617
Proximal tubule bicarbonate reclamation	40	0.5252	6	1.2303e-05	4.91	0.0038141	0.00018511	0.1875
Taste transduction	116	1.5231	9	2.1031e-05	4.6771	0.0064984	0.00030266	0.15332
Nicotinate and nicotinamide metabolism	92	1.208	8	2.684e-05	4.5712	0.0082666	0.00037016	0.12829
Pantothenate and CoA biosynthesis	47	0.61711	6	3.1912e-05	4.496	0.0097969	0.00042251	0.19045
Glucagon signaling pathway	132	1.7332	9	5.8587e-05	4.2322	0.017928	0.00074585	0.13095
D-Glutamine and D-glutamate metabolism	18	0.23634	4	7.5691e-05	4.121	0.023086	0.00092792	0.30261
Phenylalanine, tyrosine and tryptophan biosynthesis	40	0.5252	5	0.00016577	3.7805	0.050393	0.001938	0.1336
beta-Alanine metabolism	63	0.82719	6	0.00016994	3.7697	0.051493	0.001938	0.22188
Valine, leucine and isoleucine degradation	90	1.1817	7	0.00017565	3.7554	0.053045	0.001938	0.41381
Sulfur metabolism	43	0.56459	5	0.00023495	3.629	0.07072	0.0025087	0.10345
Thiamine metabolism	47	0.61711	5	0.00035896	3.445	0.10769	0.003713	0.15594
D-Arginine and D-ornithine metabolism	12	0.15756	3	0.00044743	3.3493	0.13378	0.0044879	0.23077
Phenylalanine metabolism	77	1.011	6	0.00051017	3.2923	0.15203	0.0049666	0.090284
Oxidative phosphorylation	149	1.9564	8	0.00076593	3.1158	0.22748	0.0070423	0.057554
Glycerophospholipid metabolism	149	1.9564	8	0.00076593	3.1158	0.22748	0.0070423	0.35809
Parkinson disease	157	2.0614	8	0.0010766	2.9679	0.3176	0.0095453	0.17965
Synthesis and degradation of ketone bodies	16	0.21008	3	0.0010958	2.9603	0.32218	0.0095453	0.83267
Nitrogen metabolism	36	0.47268	4	0.0012128	2.9162	0.35536	0.010294	0.20061
Phosphonate and phosphinate metabolism	63	0.82719	5	0.0013904	2.8569	0.40599	0.011505	0.086207
Pentose phosphate pathway	65	0.85345	5	0.0016	2.7959	0.4656	0.012917	0.17084
Sulfur relay system	19	0.24947	3	0.0018423	2.7346	0.53425	0.014519	0.20588
Glycolysis or Gluconeogenesis	99	1.2999	6	0.0019049	2.7201	0.55053	0.014664	0.52426
Ascorbate and aldarate metabolism	76	0.99789	5	0.0031899	2.4962	0.91868	0.023996	0.097781
Lysine degradation	115	1.51	6	0.0040328	2.3944	1	0.029664	0.081587
Propanoate metabolism	82	1.0767	5	0.0044252	2.3541	1	0.031842	0.080863
Pentose and glucuronate interconversions	89	1.1686	5	0.0062587	2.2035	1	0.044077	0.078368
Thyroid hormone synthesis	95	1.2474	5	0.0082085	2.0857	1	0.056604	0.0625
GABAergic synapse	98	1.2867	5	0.0093261	2.0303	1	0.061812	0.1985
Vitamin digestion and absorption	63	0.82719	4	0.0093371	2.0298	1	0.061812	0.063636
Primary bile acid biosynthesis	64	0.84032	4	0.0098601	2.0061	1	0.063994	0.23168
Histidine metabolism	70	0.9191	4	0.013398	1.873	1	0.085285	0.087171
Tyrosine metabolism	114	1.4968	5	0.017085	1.7674	1	0.1067	0.082595
Galactose metabolism	77	1.011	4	0.018439	1.7343	1	0.11302	0.14463
Aldosterone synthesis and secretion	120	1.5756	5	0.020849	1.6809	1	0.12548	0.071429
Neomycin, kanamycin and gentamicin biosynthesis	86	1.1292	4	0.026453	1.5775	1	0.15361	0.059252
Renin secretion	86	1.1292	4	0.026453	1.5775	1	0.15361	0.097559
Synaptic vesicle cycle	90	1.1817	4	0.03059	1.5144	1	0.17458	0.085714
Neuroactive ligand-receptor interaction	392	5.147	10	0.033768	1.4715	1	0.18945	0.062116
Bile secretion	246	3.23	7	0.04346	1.3619	1	0.23976	0.18685
Amyotrophic lateral sclerosis (ALS)	61	0.80093	3	0.045948	1.3377	1	0.24933	0.054882
Basal cell carcinoma	64	0.84032	3	0.051723	1.2863	1	0.27613	0.15567
Mitophagy - animal	65	0.85345	3	0.053722	1.2698	1	0.28114	0.38721
One carbon pool by folate	29	0.38077	2	0.055187	1.2582	1	0.28114	0.98724
Choline metabolism in cancer	109	1.4312	4	0.055209	1.258	1	0.28114	0.092593
Regulation of lipolysis in adipocytes	69	0.90597	3	0.062084	1.207	1	0.31136	0.068289
Inositol phosphate metabolism	121	1.5887	4	0.074956	1.1252	1	0.37031	0.12648
Fatty acid biosynthesis	76	0.99789	3	0.078067	1.1075	1	0.38	0.042682
Tryptophan metabolism	124	1.6281	4	0.080384	1.0948	1	0.3801	0.068134
HIF-1 signaling pathway	124	1.6281	4	0.080384	1.0948	1	0.3801	0.097985
Amphetamine addiction	78	1.0241	3	0.082934	1.0813	1	0.38664	0.059553
Thyroid cancer	37	0.48581	2	0.084648	1.0724	1	0.38915	0.09529
Insulin resistance	128	1.6806	4	0.087916	1.0559	1	0.39863	0.029197
Prolactin signaling pathway	81	1.0635	3	0.090473	1.0435	1	0.40468	0.045455
cAMP signaling pathway	241	3.1643	6	0.097813	1.0096	1	0.43168	0.20411
Alcoholism	194	2.5472	5	0.11216	0.95017	1	0.48761	0.13076
Selenocompound metabolism	44	0.57772	2	0.11343	0.94527	1	0.48761	0.066815
African trypanosomiasis	45	0.59085	2	0.11773	0.92912	1	0.49867	0.054054
AMPK signaling pathway	143	1.8776	4	0.11902	0.92439	1	0.49867	0.042217
Nicotine addiction	47	0.61711	2	0.12644	0.89811	1	0.52315	0.10891
Longevity regulating pathway	97	1.2736	3	0.13503	0.86956	1	0.55181	0.5557
Insulin secretion	98	1.2867	3	0.13804	0.86	1	0.5572	0.071233
Glycerolipid metabolism	99	1.2999	3	0.14106	0.85059	1	0.56255	0.079908
Type II diabetes mellitus	52	0.68276	2	0.14884	0.82728	1	0.58133	0.07496
Amino sugar and nucleotide sugar metabolism	156	2.0483	4	0.14928	0.82599	1	0.58133	0.049305
Morphine addiction	103	1.3524	3	0.15338	0.81423	1	0.59034	0.12013
Cocaine addiction	57	0.74841	2	0.17196	0.76457	1	0.65424	0.065189
Retrograde endocannabinoid signaling	167	2.1927	4	0.17696	0.75212	1	0.66562	0.10691
Endometrial cancer	59	0.77467	2	0.18137	0.74143	1	0.67453	0.1157
Cholesterol metabolism	60	0.7878	2	0.1861	0.73025	1	0.68445	0.066116
Terpenoid backbone biosynthesis	67	0.87971	2	0.21966	0.65825	1	0.79898	0.045285
Porphyrin and chlorophyll metabolism	184	2.4159	4	0.22276	0.65216	1	0.80145	0.028052
Adherens junction	71	0.93223	2	0.23907	0.62148	1	0.83239	0.081677
Thermogenesis	254	3.335	5	0.24157	0.61695	1	0.83239	0.071429
Thyroid hormone signaling pathway	130	1.7069	3	0.24361	0.6133	1	0.83239	0.068727
Renal cell carcinoma	72	0.94536	2	0.24393	0.61273	1	0.83239	0.034785
Sphingolipid metabolism	72	0.94536	2	0.24393	0.61273	1	0.83239	0.27983
Starch and sucrose metabolism	73	0.95849	2	0.2488	0.60414	1	0.84035	0.094127
Carbohydrate digestion and absorption	74	0.97162	2	0.25368	0.59572	1	0.84815	0.048387
Sphingolipid signaling pathway	134	1.7594	3	0.2577	0.58888	1	0.853	0.05343
FoxO signaling pathway	136	1.7857	3	0.26479	0.57709	1	0.86224	0.06222
Cortisol synthesis and secretion	77	1.011	2	0.26831	0.57136	1	0.86224	0.033333
Chronic myeloid leukemia	77	1.011	2	0.26831	0.57136	1	0.86224	0.090104
Biosynthesis of unsaturated fatty acids	79	1.0373	2	0.27807	0.55585	1	0.885	0.015383
Glycosaminoglycan biosynthesis - heparan sulfate / heparin	26	0.34138	1	0.29109	0.53598	1	0.91762	0.033333
Folate biosynthesis	83	1.0898	2	0.29755	0.52644	1	0.92914	0.025276
Colorectal cancer	87	1.1423	2	0.31695	0.49901	1	0.98048	0.052
Biotin metabolism	31	0.40703	1	0.33653	0.47297	1	1	0.037773
mTOR signaling pathway	157	2.0614	3	0.34014	0.46835	1	1	0.23663
Fatty acid degradation	94	1.2342	2	0.35059	0.4552	1	1	0.059196
Wnt signaling pathway	161	2.1139	3	0.35452	0.45035	1	1	0.19203
Vitamin B6 metabolism	34	0.44642	1	0.3624	0.44082	1	1	0.025
Autophagy - other	35	0.45955	1	0.37079	0.43087	1	1	0.027778
Collecting duct acid secretion	35	0.45955	1	0.37079	0.43087	1	1	0.045455
Phototransduction	36	0.47268	1	0.37908	0.42127	1	1	0.020833
Cushing syndrome	168	2.2059	3	0.3796	0.42067	1	1	0.026179
Glycosylphosphatidylinositol (GPI)-anchor biosynthesis	39	0.51207	1	0.4033	0.39438	1	1	0.092873
Melanogenesis	107	1.4049	2	0.41143	0.3857	1	1	0.050969
cGMP-PKG signaling pathway	177	2.324	3	0.41153	0.38559	1	1	0.083819
Prostate cancer	108	1.418	2	0.416	0.38091	1	1	0.06939
Bladder cancer	41	0.53833	1	0.41892	0.37787	1	1	0.032226
Amoebiasis	115	1.51	2	0.44748	0.34923	1	1	0.03306
Parathyroid hormone synthesis, secretion and action	116	1.5231	2	0.4519	0.34496	1	1	0.024096
Huntington disease	196	2.5735	3	0.47709	0.3214	1	1	0.044803
Glutamatergic synapse	122	1.6019	2	0.47799	0.32058	1	1	0.19383
Mannose type O-glycan biosynthesis	50	0.6565	1	0.48433	0.31486	1	1	0.067701
Cholinergic synapse	124	1.6281	2	0.48652	0.3129	1	1	0.080645
Cell cycle	124	1.6281	2	0.48652	0.3129	1	1	0.081326
Lysosome	127	1.6675	2	0.49916	0.30176	1	1	0.025974
Phosphatidylinositol signaling system	128	1.6806	2	0.50332	0.29815	1	1	0.27707
Notch signaling pathway	53	0.69589	1	0.50447	0.29717	1	1	0.16071
Fat digestion and absorption	54	0.70902	1	0.511	0.29158	1	1	0.089552
Inflammatory mediator regulation of TRP channels	135	1.7726	2	0.53187	0.2742	1	1	0.038899
Vibrio cholerae infection	59	0.77467	1	0.54243	0.26566	1	1	0.034483
Platelet activation	138	1.8119	2	0.54375	0.2646	1	1	0.099478
Measles	139	1.8251	2	0.54767	0.26148	1	1	0.022347
Drug metabolism - other enzymes	142	1.8645	2	0.55928	0.25237	1	1	0.021505
Longevity regulating pathway - multiple species	64	0.84032	1	0.57184	0.24272	1	1	0.018868
Fluid shear stress and atherosclerosis	147	1.9301	2	0.57816	0.23795	1	1	0.031142
Fatty acid elongation	67	0.87971	1	0.58858	0.23019	1	1	0.057643
Breast cancer	150	1.9695	2	0.5892	0.22974	1	1	0.017858
Long-term depression	69	0.90597	1	0.59938	0.2223	1	1	0.097945
Gastric cancer	153	2.0089	2	0.60003	0.22183	1	1	0.052743
Hepatitis C	157	2.0614	2	0.61413	0.21174	1	1	0.021489
Serotonergic synapse	157	2.0614	2	0.61413	0.21174	1	1	0.025316
Non-small cell lung cancer	72	0.94536	1	0.61505	0.21109	1	1	0.019608
Ether lipid metabolism	72	0.94536	1	0.61505	0.21109	1	1	0.023796
p53 signaling pathway	72	0.94536	1	0.61505	0.21109	1	1	0.1875
Ovarian steroidogenesis	73	0.95849	1	0.62013	0.20751	1	1	0.014493
GnRH secretion	73	0.95849	1	0.62013	0.20751	1	1	0.020833
Bacterial invasion of epithelial cells	73	0.95849	1	0.62013	0.20751	1	1	0.045121
Melanoma	73	0.95849	1	0.62013	0.20751	1	1	0.073733
Long-term potentiation	74	0.97162	1	0.62515	0.20401	1	1	0.11787
Platinum drug resistance	76	0.99789	1	0.635	0.19723	1	1	0.048309
Steroid biosynthesis	77	1.011	1	0.63982	0.19394	1	1	0.018068
Epithelial cell signaling in Helicobacter pylori infection	77	1.011	1	0.63982	0.19394	1	1	0.046512
Human papillomavirus infection	333	4.3723	4	0.64088	0.19322	1	1	0.048699
Cellular senescence	165	2.1665	2	0.6412	0.19301	1	1	0.066566
Pancreatic cancer	78	1.0241	1	0.64458	0.19072	1	1	0.019231
Arrhythmogenic right ventricular cardiomyopathy (ARVC)	79	1.0373	1	0.64928	0.18757	1	1	0.016125
Glioma	79	1.0373	1	0.64928	0.18757	1	1	0.029826
PPAR signaling pathway	81	1.0635	1	0.6585	0.18145	1	1	0.10886
Necroptosis	172	2.2584	2	0.66365	0.17806	1	1	0.031579
Salmonella infection	84	1.1029	1	0.67187	0.17272	1	1	0.02
Pertussis	86	1.1292	1	0.68049	0.16718	1	1	0.014922
Fructose and mannose metabolism	87	1.1423	1	0.68472	0.16449	1	1	0.013158
ECM-receptor interaction	89	1.1686	1	0.69301	0.15926	1	1	0.0071928
Hepatocellular carcinoma	182	2.3897	2	0.69376	0.15879	1	1	0.018184
Transcriptional misregulation in cancer	186	2.4422	2	0.70517	0.1517	1	1	0.019231
Hypertrophic cardiomyopathy (HCM)	93	1.2211	1	0.70894	0.14939	1	1	0.021277
PD-L1 expression and PD-1 checkpoint pathway in cancer	93	1.2211	1	0.70894	0.14939	1	1	0.022605
Small cell lung cancer	95	1.2474	1	0.7166	0.14473	1	1	0.021739
Kaposi sarcoma-associated herpesvirus infection	191	2.5078	2	0.71894	0.14331	1	1	0.015442
Gap junction	99	1.2999	1	0.73131	0.1359	1	1	0.057206
Viral carcinogenesis	201	2.6391	2	0.74487	0.12792	1	1	0.07257
Focal adhesion	201	2.6391	2	0.74487	0.12792	1	1	0.3255
Ubiquinone and other terpenoid-quinone biosynthesis	103	1.3524	1	0.74527	0.12769	1	1	0.012041
Calcium signaling pathway	203	2.6654	2	0.7498	0.12505	1	1	0.10642
NF-kappa B signaling pathway	105	1.3787	1	0.75198	0.1238	1	1	0.0062879
Ribosome biogenesis in eukaryotes	105	1.3787	1	0.75198	0.1238	1	1	0.016393
Epstein-Barr virus infection	204	2.6785	2	0.75224	0.12364	1	1	0.014386
Pathways in cancer	562	7.3791	6	0.75372	0.12279	1	1	0.032005
Circadian entrainment	106	1.3918	1	0.75526	0.1219	1	1	0.066286
Chagas disease (American trypanosomiasis)	108	1.418	1	0.76171	0.11821	1	1	0.013514
Endocrine resistance	108	1.418	1	0.76171	0.11821	1	1	0.016099
Proteoglycans in cancer	211	2.7704	2	0.76873	0.11422	1	1	0.021444
Leukocyte transendothelial migration	116	1.5231	1	0.78584	0.10466	1	1	0.035396
Neurotrophin signaling pathway	124	1.6281	1	0.80755	0.092831	1	1	0.084103
Human cytomegalovirus infection	231	3.033	2	0.81072	0.091128	1	1	0.019238
Signaling pathways regulating pluripotency of stem cells	140	1.8382	1	0.84462	0.073338	1	1	0.02173
Apoptosis	140	1.8382	1	0.84462	0.073338	1	1	0.045446
Dopaminergic synapse	143	1.8776	1	0.85074	0.070205	1	1	0.013699
Autophagy - animal	143	1.8776	1	0.85074	0.070205	1	1	0.029333
PI3K-Akt signaling pathway	358	4.7006	3	0.85384	0.068624	1	1	0.17356
Estrogen signaling pathway	146	1.917	1	0.85661	0.067216	1	1	0.016085
Vascular smooth muscle contraction	148	1.9432	1	0.8604	0.065299	1	1	0.020882
Hippo signaling pathway	154	2.022	1	0.87118	0.059891	1	1	0.011872
Steroid hormone biosynthesis	159	2.0877	1	0.87953	0.055748	1	1	0.033522
Phospholipase D signaling pathway	159	2.0877	1	0.87953	0.055748	1	1	0.060944
Hepatitis B	163	2.1402	1	0.88582	0.052653	1	1	0.0076885
Alzheimer disease	178	2.3372	1	0.90664	0.042565	1	1	0.015385
NOD-like receptor signaling pathway	187	2.4553	1	0.91727	0.037502	1	1	0.0057803
MicroRNAs in cancer	310	4.0703	2	0.91774	0.03728	1	1	0.011151
Tuberculosis	197	2.5866	1	0.92768	0.032602	1	1	0.0078593
Rap1 signaling pathway	215	2.823	1	0.94324	0.025376	1	1	0.036548
Human T-cell leukemia virus 1 infection	224	2.9411	1	0.94973	0.022401	1	1	0.0083216
MAPK signaling pathway	300	3.939	1	0.98202	0.0078785	1	1	0.099121
Olfactory transduction	456	5.9873	2	0.98441	0.006826	1	1	0.045455
Herpes simplex virus 1 infection	494	6.4863	1	0.99874	0.00054775	1	1	0.0075188
