# Supplementary material for: Integrating Multi-Omics Analysis for Enhanced Diagnosis and Treatment of Glioblastoma: A Comprehensive Data-Driven Approach
Source: Preprints.org preprint supplement (doi:10.20944/preprints202303.0355.v1), 2023-03-20
Supplement: Supplementary file 20 [file Supplementary Table 26 -Ten highest score -mix results.xlsx]

## Sheet: Sheet1
Degree	FDR	Impact	Betweenness	FDR	Impact	Closeness	FDR	Impact
Alanine, aspartate and glutamate metabolism	4.3998e-12	0.91803	Citrate cycle (TCA cycle)	3.6706e-07	0.38724	Citrate cycle (TCA cycle)	3.6706e-07	1.3489
Citrate cycle (TCA cycle)	3.6706e-07	0.81818	One carbon pool by folate	0.28114	0.37249	One carbon pool by folate	0.28114	0.98724
Arginine biosynthesis	4.022e-10	0.8	Glycolysis or Gluconeogenesis	0.014664	0.3001	Arginine biosynthesis	4.022e-10	0.87633
One carbon pool by folate	0.28114	0.73333	Arginine biosynthesis	4.022e-10	0.28235	Synthesis and degradation of ketone bodies	0.0095453	0.83267
Synthesis and degradation of ketone bodies	0.0095453	0.7	Pyrimidine metabolism	1.8067e-07	0.27877	Longevity regulating pathway	0.55181	0.5557
p53 signaling pathway	1	0.68182	Glycerophospholipid metabolism	0.0070423	0.27644	Glycolysis or Gluconeogenesis	0.014664	0.52426
Pyruvate metabolism	5.7456e-05	0.58491	Purine metabolism	8.6118e-07	0.19756	Pyruvate metabolism	5.7456e-05	0.50281
Purine metabolism	8.6118e-07	0.57426	Alanine, aspartate and glutamate metabolism	4.3998e-12	0.18695	Valine, leucine and isoleucine degradation	0.001938	0.41381
Glutathione metabolism	9.593e-08	0.56522	Glutathione metabolism	9.593e-08	0.17897	Mitophagy - animal	0.28114	0.38721
Pyrimidine metabolism	1.8067e-07	0.55814	Phosphatidylinositol signaling system	1	0.17773	Glycine, serine and threonine metabolism	5.162e-09	0.36751
