# Supplementary material for: Integrating Multi-Omics Analysis for Enhanced Diagnosis and Treatment of Glioblastoma: A Comprehensive Data-Driven Approach
Source: Preprints.org preprint supplement (doi:10.20944/preprints202303.0355.v1), 2023-03-20
Supplement: Supplementary file 21 [file Supplementary Table 3.xlsx]

## Sheet: C1621958
Disease	Disease_id	Gene	Gene_id	UniProt	Gene_Full_Name	Protein_Class	N_diseases_g	DSI_g	DPI_g	pLI	Score_gda	EL_gda	EI_gda	N_PMIDs	N_SNPs_gda	First_Ref	Last_Ref
Glioblastoma Multiforme	C1621958	MTOR	2475	P42345	mechanistic target of rapamycin kinase	Kinase	960	0.343	0.885	1	0.6		0.967	30	0	2005	2019
Glioblastoma Multiforme	C1621958	MDM4	4194	O15151	MDM4 regulator of p53	Nucleic acid binding	265	0.461	0.808	0.99992	0.6		1	14	0	2002	2018
Glioblastoma Multiforme	C1621958	PTK2	5747	Q05397	protein tyrosine kinase 2	Kinase	205	0.497	0.808	0.99987	0.55		1	6	0	2003	2019
Glioblastoma Multiforme	C1621958	BRD2	6046	P25440	bromodomain containing 2	Epigenetic regulator	303	0.45	0.808	0.99957	0.53		1	4	0	1999	2018
Glioblastoma Multiforme	C1621958	EGFR	1956	P00533	epidermal growth factor receptor	Kinase	1394	0.295	0.885	0.36837	0.5		0.973	562	6	1988	2020
Glioblastoma Multiforme	C1621958	IDH1	3417	O75874	isocitrate dehydrogenase (NADP(+)) 1		399	0.424	0.808	2.6244e-12	0.5		0.977	257	3	2008	2020
Glioblastoma Multiforme	C1621958	PIK3CA	5290	P42336	phosphatidylinositol-4,5-bisphosphate 3-kinase catalytic subunit alpha	Kinase	1511	0.292	0.923	1	0.5		0.941	152	0	2000	2020
Glioblastoma Multiforme	C1621958	APC	324	P25054	APC regulator of WNT signaling pathway		703	0.373	0.962	1	0.43		1	4	0	1995	2019
Glioblastoma Multiforme	C1621958	CHI3L1	1116	P36222	chitinase 3 like 1		420	0.419	0.885	1.1133e-05	0.4		0.913	23	0	2002	2020
Glioblastoma Multiforme	C1621958	CTSB	1508	P07858	cathepsin B	Enzyme	304	0.457	0.846	5.8819e-11	0.4		1	12	0	1995	2019
Glioblastoma Multiforme	C1621958	EGF	1950	P01133	epidermal growth factor		774	0.357	0.923	8.5294e-17	0.4		0.986	72	0	1988	2019
Glioblastoma Multiforme	C1621958	FN1	2335	P02751	fibronectin 1	Signaling	724	0.365	0.962	0.0014045	0.4		1	14	0	1991	2019
Glioblastoma Multiforme	C1621958	H3-3A	3020	P84243	H3.3 histone A		134	0.559	0.692	0.1231	0.4		0.933	15	3	2012	2016
Glioblastoma Multiforme	C1621958	HIF1A	3091	Q16665	hypoxia inducible factor 1 subunit alpha	Transcription factor	1044	0.327	0.923	0.9777	0.4		1	73	0	2000	2019
Glioblastoma Multiforme	C1621958	IDH2	3418	P48735	isocitrate dehydrogenase (NADP(+)) 2		380	0.434	0.808	0.88271	0.4		0.961	76	2	2010	2020
Glioblastoma Multiforme	C1621958	IL1B	3553	P01584	interleukin 1 beta		1801	0.276	0.962	0.13005	0.4		1	20	0	1991	2018
Glioblastoma Multiforme	C1621958	CXCL8	3576	P10145	C-X-C motif chemokine ligand 8	Signaling	1254	0.31	0.962	0.00027377	0.4		1	29	0	1991	2019
Glioblastoma Multiforme	C1621958	MET	4233	P08581	MET proto-oncogene, receptor tyrosine kinase	Kinase	594	0.38	0.846	0.96998	0.4		0.978	46	0	1993	2020
Glioblastoma Multiforme	C1621958	MGMT	4255	P16455	O-6-methylguanine-DNA methyltransferase		444	0.412	0.885	1.1756e-07	0.4		0.974	391	1	1992	2020
Glioblastoma Multiforme	C1621958	MMP2	4313	P08253	matrix metallopeptidase 2	Enzyme	1021	0.333	0.923	0.83878	0.4		0.958	48	0	1999	2019
Glioblastoma Multiforme	C1621958	MMP9	4318	P14780	matrix metallopeptidase 9	Enzyme	1337	0.305	0.923	1.8869e-17	0.4		1	44	0	1996	2019
Glioblastoma Multiforme	C1621958	MYC	4609	P01106	MYC proto-oncogene, bHLH transcription factor	Transcription factor	821	0.344	0.923	0.99801	0.4		1	20	0	1986	2019
Glioblastoma Multiforme	C1621958	NOTCH1	4851	P46531	notch receptor 1		693	0.369	0.885	1	0.4		0.952	21	0	2007	2019
Glioblastoma Multiforme	C1621958	PDGFRA	5156	P16234	platelet derived growth factor receptor alpha	Kinase	452	0.415	0.808	1	0.4		0.968	31	0	1995	2020
Glioblastoma Multiforme	C1621958	MAPK8	5599	P45983	mitogen-activated protein kinase 8	Kinase	520	0.397	0.885	0.99823	0.4		1	17	0	2000	2019
Glioblastoma Multiforme	C1621958	BMI1	648	P35226	BMI1 proto-oncogene, polycomb ring finger		309	0.448	0.808	0.94286	0.4		1	16	0	2009	2019
Glioblastoma Multiforme	C1621958	TERT	7015	O14746	telomerase reverse transcriptase	Enzyme	703	0.374	0.846	0.99046	0.4		1	30	5	2003	2020
Glioblastoma Multiforme	C1621958	TP53BP1	7158	Q12888	tumor protein p53 binding protein 1	Epigenetic regulator	158	0.52	0.731	0.99985	0.4		1	11	0	2010	2019
Glioblastoma Multiforme	C1621958	VEGFA	7422	P15692	vascular endothelial growth factor A	Signaling	1899	0.266	0.923	2.4085e-05	0.4		0.994	162	4	1992	2020
Glioblastoma Multiforme	C1621958	TNFSF10	8743	P50591	TNF superfamily member 10	Signaling	445	0.413	0.885	0.13495	0.4		0.963	27	0	2007	2019
Glioblastoma Multiforme	C1621958	PROM1	8842	O43490	prominin 1	Transporter	477	0.41	0.846	1.9485e-22	0.4		0.982	111	0	2006	2020
Glioblastoma Multiforme	C1621958	IL2	3558	P60568	interleukin 2		950	0.336	0.885	0.47968	0.39		1	9	0	1987	2018
Glioblastoma Multiforme	C1621958	PRKCA	5578	P17252	protein kinase C alpha	Kinase	368	0.44	0.846	0.3677	0.39		1	9	0	2002	2020
Glioblastoma Multiforme	C1621958	AKT3	10000	Q9Y243	AKT serine/threonine kinase 3	Kinase	183	0.512	0.808	0.99958	0.38		0.875	8	1	2014	2019
Glioblastoma Multiforme	C1621958	CDK2	1017	P24941	cyclin dependent kinase 2	Kinase	270	0.456	0.692	0.61054	0.38		1	8	0	1995	2017
Glioblastoma Multiforme	C1621958	H2AX	3014	P16104	H2A.X variant histone	Nucleic acid binding	212	0.484	0.808	0.17652	0.38		1	9	0	2009	2019
Glioblastoma Multiforme	C1621958	NF1	4763	P21359	neurofibromin 1	Enzyme modulator	380	0.44	0.885	0.90175	0.38		0.889	9	0	2009	2019
Glioblastoma Multiforme	C1621958	NOTCH2	4853	Q04721	notch receptor 2		384	0.441	0.808	1	0.38		1	9	0	2009	2018
Glioblastoma Multiforme	C1621958	PRKN	5071	O60260	parkin RBR E3 ubiquitin protein ligase	Enzyme	409	0.431	0.846	6.9346e-07	0.38		1	8	0	2009	2019
Glioblastoma Multiforme	C1621958	ATRX	546	P46100	ATRX chromatin remodeler		412	0.452	0.808	1	0.38		1	8	0	2015	2018
Glioblastoma Multiforme	C1621958	CDK6	1021	Q00534	cyclin dependent kinase 6	Kinase	266	0.471	0.731	0.98315	0.37		1	8	0	2000	2017
Glioblastoma Multiforme	C1621958	GDNF	2668	P39905	glial cell derived neurotrophic factor	Signaling	409	0.434	0.885	0.2035	0.37		1	7	0	1999	2018
Glioblastoma Multiforme	C1621958	CTSK	1513	P43235	cathepsin K	Enzyme	221	0.497	0.808	3.0989e-05	0.35		1	5	0	2014	2018
Glioblastoma Multiforme	C1621958	PIK3R1	5295	P27986	phosphoinositide-3-kinase regulatory subunit 1	Kinase	285	0.477	0.885	0.99978	0.35		0.8	5	0	2004	2012
Glioblastoma Multiforme	C1621958	TGM2	7052	P21980	transglutaminase 2	Enzyme	315	0.445	0.808	6.8118e-18	0.35		1	7	0	2000	2017
Glioblastoma Multiforme	C1621958	WT1	7490	P19544	WT1 transcription factor	Nucleic acid binding	446	0.422	0.808	0.99648	0.35		1	5	0	2007	2014
Glioblastoma Multiforme	C1621958	RECK	8434	O95980	reversion inducing cysteine rich protein with kazal motifs	Enzyme modulator	123	0.547	0.731	1.9319e-10	0.35		1	5	0	2006	2015
Glioblastoma Multiforme	C1621958	NDRG1	10397	Q92597	N-myc downstream regulated 1	Enzyme	225	0.488	0.731	0.011324	0.34		1	5	0	2004	2020
Glioblastoma Multiforme	C1621958	STAG2	10735	Q8N3U4	stromal antigen 2	Nucleic acid binding	132	0.568	0.731	1	0.34		1	4	0	2011	2014
Glioblastoma Multiforme	C1621958	JAG1	182	P78504	jagged canonical Notch ligand 1		420	0.429	0.808	1	0.34		1	5	0	2010	2018
Glioblastoma Multiforme	C1621958	FAT1	2195	Q14517	FAT atypical cadherin 1		178	0.508	0.808	1.1969e-12	0.34		0.75	4	0	2013	2018
Glioblastoma Multiforme	C1621958	PRKCB	5579	P05771	protein kinase C beta	Kinase	317	0.453	0.885	1	0.34		1	4	1	2006	2011
Glioblastoma Multiforme	C1621958	RUNX1	861	Q01196	RUNX family transcription factor 1	Transcription factor	412	0.425	0.808	0.65377	0.34		1	5	0	2012	2019
Glioblastoma Multiforme	C1621958	RUNX3	864	Q13761	RUNX family transcription factor 3	Transcription factor	281	0.459	0.731	0.84295	0.34		1	4	0	2007	2019
Glioblastoma Multiforme	C1621958	HEY1	23462	Q9Y5J3	hes related family bHLH transcription factor with YRPW motif 1	Transcription factor	110	0.551	0.692	0.050181	0.33		1	4	0	2009	2018
Glioblastoma Multiforme	C1621958	BRD4	23476	O60885	bromodomain containing 4	Epigenetic regulator	335	0.446	0.885	1	0.33		1	5	0	2014	2019
Glioblastoma Multiforme	C1621958	HES1	3280	Q14469	hes family bHLH transcription factor 1	Transcription factor	243	0.468	0.885	0.7072	0.33		1	4	0	2010	2019
Glioblastoma Multiforme	C1621958	PIM1	5292	P11309	Pim-1 proto-oncogene, serine/threonine kinase	Kinase	224	0.482	0.769	0.84846	0.33		1	3	0	2013	2019
Glioblastoma Multiforme	C1621958	PML	5371	P29590	promyelocytic leukemia		274	0.477	0.846	0.21291	0.33		1	4	0	2009	2017
Glioblastoma Multiforme	C1621958	LZTR1	8216	Q8N653	leucine zipper like transcription regulator 1		152	0.547	0.808	1.0211e-92	0.33		1	4	0	2013	2020
Glioblastoma Multiforme	C1621958	CD9	928	P21926	CD9 molecule		156	0.528	0.769	0.0047221	0.33		1	3	0	2009	2016
Glioblastoma Multiforme	C1621958	ERN1	2081	O75460	endoplasmic reticulum to nucleus signaling 1	Kinase	163	0.513	0.808	0.99027	0.32		1	2	0	2015	2018
Glioblastoma Multiforme	C1621958	TES	26136	Q9UGI8	testin LIM domain protein	Cellular structure	67	0.604	0.692	1.0234e-15	0.32		1	2	0	2007	2013
Glioblastoma Multiforme	C1621958	GSTT1	2952	P30711	glutathione S-transferase theta 1		541	0.393	0.923	0.00014834	0.32		1	2	0	2004	2006
Glioblastoma Multiforme	C1621958	POLK	51426	Q9UBT6	DNA polymerase kappa		48	0.691	0.423	7.4692e-13	0.32		1	2	0	2016	2019
Glioblastoma Multiforme	C1621958	SRRT	51593	Q9BXP5	serrate, RNA effector molecule		16	0.736	0.231	0.59362	0.32		1	2	0	2018	2018
Glioblastoma Multiforme	C1621958	H3C2	8358	P68431	H3 clustered histone 2		43	0.653	0.423	1.4796e-05	0.32		1	3	0	2012	2015
Glioblastoma Multiforme	C1621958	BHLHE40	8553	O14503	basic helix-loop-helix family member e40	Transcription factor	113	0.544	0.731	0.99444	0.32		1	3	0	2001	2013
Glioblastoma Multiforme	C1621958	CDK3	1018	Q00526	cyclin dependent kinase 3	Kinase	24	0.716	0.385	2.1415e-07	0.31		1	1	0	2008	2008
Glioblastoma Multiforme	C1621958	CSTB	1476	P04080	cystatin B	Enzyme modulator	155	0.53	0.692	0.0065562	0.31		1	2	0	2003	2012
Glioblastoma Multiforme	C1621958	SIK1	150094	A0A0B4J2F2;P57059	salt inducible kinase 1	Kinase	157	0.544	0.731	0.93716	0.31		0	1	0	2016	2016
Glioblastoma Multiforme	C1621958	DUSP6	1848	Q16828	dual specificity phosphatase 6		196	0.511	0.846	0.97603	0.31		1	1	0	2011	2011
Glioblastoma Multiforme	C1621958	SUZ12	23512	Q15022	SUZ12 polycomb repressive complex 2 subunit	Nucleic acid binding	165	0.529	0.577	0.99998	0.31		1	2	0	2014	2019
Glioblastoma Multiforme	C1621958	FOSL2	2355	P15408	FOS like 2, AP-1 transcription factor subunit	Transcription factor	83	0.595	0.692	0.98293	0.31		1	2	0	2012	2013
Glioblastoma Multiforme	C1621958	HSPB8	26353	Q9UJY1	heat shock protein family B (small) member 8		122	0.57	0.577	0.043128	0.31		1	1	0	2011	2011
Glioblastoma Multiforme	C1621958	SEPTIN14	346288	Q6ZU15	septin 14		8	0.805	0.077	6.8701e-06	0.31		1	1	0	2013	2013
Glioblastoma Multiforme	C1621958	JAG2	3714	Q9Y219	jagged canonical Notch ligand 2		81	0.576	0.846	1	0.31		1	2	0	2010	2010
Glioblastoma Multiforme	C1621958	NOTCH3	4854	Q9UM47	notch receptor 3		418	0.435	0.808	0.40757	0.31		1	2	0	2010	2016
Glioblastoma Multiforme	C1621958	NLK	51701	Q9UBE8	nemo like kinase	Kinase	75	0.59	0.692	0.99991	0.31		1	1	0	2015	2015
Glioblastoma Multiforme	C1621958	BCHE	590	P06276	butyrylcholinesterase		392	0.447	0.923	1.0643e-13	0.31		1	1	0	1990	1990
Glioblastoma Multiforme	C1621958	RPS6KA3	6197	P51812	ribosomal protein S6 kinase A3	Kinase	315	0.491	0.846	0.99999	0.31		1	1	0	2016	2016
Glioblastoma Multiforme	C1621958	LTBP4	8425	Q8N2S1	latent transforming growth factor beta binding protein 4	Calcium-binding protein	93	0.604	0.654	0.49911	0.31		1	1	0	2016	2016
Glioblastoma Multiforme	C1621958	TAF1L	138474	Q8IZX4	TATA-box binding protein associated factor 1 like	Epigenetic regulator	9	0.839	0.154	0.96182	0.3			0	0
Glioblastoma Multiforme	C1621958	CSTA	1475	P01040	cystatin A	Enzyme modulator	97	0.592	0.731	0.00015316	0.3		1	1	0	2012	2012
Glioblastoma Multiforme	C1621958	CTNND2	1501	Q9UQB3	catenin delta 2	Cellular structure	117	0.579	0.731	1	0.3		1	1	0	2013	2013
Glioblastoma Multiforme	C1621958	DEUP1	159989	Q05D60	deuterosome assembly protein 1	Cellular structure	22	0.716	0.231	8.1904e-13	0.3		1	1	0	2019	2019
Glioblastoma Multiforme	C1621958	STKLD1	169436	Q8NE28	serine/threonine kinase like domain containing 1	Kinase	10	0.931	0.115	1.5666e-23	0.3			0	0
Glioblastoma Multiforme	C1621958	EPHB6	2051	O15197	EPH receptor B6	Kinase	60	0.619	0.538	1.2013e-07	0.3			0	0
Glioblastoma Multiforme	C1621958	PRKD3	23683	O94806	protein kinase D3	Kinase	22	0.76	0.154	0.0052882	0.3			0	0
Glioblastoma Multiforme	C1621958	GRIK2	2898	Q13002	glutamate ionotropic receptor kainate type subunit 2	Ion channel	130	0.561	0.769	0.99841	0.3		1	1	0	2019	2019
Glioblastoma Multiforme	C1621958	GUCY2F	2986	P51841	guanylate cyclase 2F, retinal	Kinase	6	0.821	0.231	1.0552e-13	0.3			0	1
Glioblastoma Multiforme	C1621958	IFNA2	3440	P01563	interferon alpha 2		355	0.442	0.885		0.3		1	1	0	2008	2008
Glioblastoma Multiforme	C1621958	INSRR	3645	P14616	insulin receptor related receptor	Kinase	186	0.508	0.808	5.3976e-24	0.3			0	0
Glioblastoma Multiforme	C1621958	IRAK1	3654	P51617	interleukin 1 receptor associated kinase 1	Kinase	200	0.506	0.808	0.98774	0.3			0	0
Glioblastoma Multiforme	C1621958	SLC22A10	387775	Q63ZE4	solute carrier family 22 member 10		12	0.769	0.308	1.8871e-19	0.3		1	1	0	2019	2019
Glioblastoma Multiforme	C1621958	ZBTB7A	51341	O95365	zinc finger and BTB domain containing 7A	Transcription factor	103	0.564	0.769	0.95915	0.3		1	1	0	2016	2016
Glioblastoma Multiforme	C1621958	TRIM33	51592	Q9UPN9	tripartite motif containing 33		63	0.626	0.577	1	0.3			0	0
Glioblastoma Multiforme	C1621958	PDK2	5164	Q15119	pyruvate dehydrogenase kinase 2	Kinase	20	0.751	0.269	3.7102e-06	0.3			0	1
Glioblastoma Multiforme	C1621958	STYK1	55359	Q6J9G0	serine/threonine/tyrosine kinase 1	Kinase	39	0.67	0.346	9.1009e-11	0.3			0	0
Glioblastoma Multiforme	C1621958	LRRC59	55379	Q96AG4	leucine rich repeat containing 59		23	0.705	0.5	0.43432	0.3		1	1	0	2019	2019
Glioblastoma Multiforme	C1621958	CDC42BPG	55561	Q6DT37	CDC42 binding protein kinase gamma	Kinase	4	0.89	0.192	4.5623e-26	0.3			0	1
Glioblastoma Multiforme	C1621958	TRIB3	57761	Q96RU7	tribbles pseudokinase 3	Kinase	104	0.573	0.692	1.1597e-13	0.3			0	1
Glioblastoma Multiforme	C1621958	TRMT11	60487	Q7Z4G4	tRNA methyltransferase 11 homolog		20	0.729	0.269	3.9134e-12	0.3		1	1	0	2019	2019
Glioblastoma Multiforme	C1621958	PINK1	65018	Q9BXM7	PTEN induced kinase 1	Kinase	209	0.516	0.769	1.8749e-10	0.3			0	1
Glioblastoma Multiforme	C1621958	TMEM135	65084	Q86UB9	transmembrane protein 135		17	0.751	0.346	0.7786	0.3		1	1	0	2019	2019
Glioblastoma Multiforme	C1621958	SRPK2	6733	P78362	SRSF protein kinase 2	Kinase	51	0.653	0.423	0.99697	0.3			0	0
Glioblastoma Multiforme	C1621958	MAPKAPK3	7867	Q16644	MAPK activated protein kinase 3	Kinase	19	0.743	0.308	3.7216e-09	0.3			0	1
Glioblastoma Multiforme	C1621958	DYRK2	8445	Q92630	dual specificity tyrosine phosphorylation regulated kinase 2	Kinase	35	0.67	0.346	0.99751	0.3			0	1
Glioblastoma Multiforme	C1621958	CCNH	902	P51946	cyclin H	Enzyme modulator	83	0.595	0.769	0.00081328	0.3		1	1	0	2019	2019
Glioblastoma Multiforme	C1621958	MACIR	90355	Q96GV9	macrophage immunometabolism regulator		32	0.691	0.462	0.42746	0.3		1	1	0	2019	2019
Glioblastoma Multiforme	C1621958	NCOR1	9611	O75376	nuclear receptor corepressor 1	Transcription factor	94	0.597	0.731	1	0.3		1	1	0	2007	2007
Glioblastoma Multiforme	C1621958	ERBB2	2064	P04626	erb-b2 receptor tyrosine kinase 2	Kinase	995	0.328	0.923	0.0059892	0.2		0.96	25	0	1990	2019
Glioblastoma Multiforme	C1621958	MSH6	2956	P52701	mutS homolog 6	Nucleic acid binding	296	0.462	0.731	3.6705e-05	0.2		1	14	2	2004	2019
Glioblastoma Multiforme	C1621958	MLH1	4292	P40692	mutL homolog 1	Nucleic acid binding	526	0.399	0.808	3.41e-05	0.2		1	11	1	2000	2017
Glioblastoma Multiforme	C1621958	TP53	7157	P04637	tumor protein p53	Transcription factor	2494	0.236	0.962	0.53235	0.2		0.97	329	16	1990	2020
Glioblastoma Multiforme	C1621958	MSH2	4436	P43246	mutS homolog 2	Nucleic acid binding	490	0.406	0.808	0.89539	0.18		1	8	1	2003	2017
Glioblastoma Multiforme	C1621958	PMS2	5395	P54278	PMS1 homolog 2, mismatch repair system component	Nucleic acid binding	244	0.484	0.808	4.5176e-27	0.16		0.833	6	0	2004	2017
Glioblastoma Multiforme	C1621958	KRAS	3845	P01116	KRAS proto-oncogene, GTPase	Enzyme modulator	1213	0.32	0.923	0.00078803	0.15		1	5	1	2011	2019
Glioblastoma Multiforme	C1621958	RTEL1	51750	Q9NZ71	regulator of telomere elongation helicase 1	Enzyme	321	0.459	0.808	8.8674e-10	0.15		1	8	3	2010	2018
Glioblastoma Multiforme	C1621958	CCDC26	137196	Q8TAB7	CCDC26 long non-coding RNA		60	0.647	0.615		0.14		1	6	5	2010	2018
Glioblastoma Multiforme	C1621958	TGFBR2	7048	P37173	transforming growth factor beta receptor 2	Kinase	502	0.413	0.846	0.12535	0.13		1	3	0	2008	2018
Glioblastoma Multiforme	C1621958	DNMT3A	1788	Q9Y6K1	DNA methyltransferase 3 alpha		350	0.445	0.846	7.3538e-39	0.12		1	2	1	2008	2015
Glioblastoma Multiforme	C1621958	SSBP2	23635	P81877	single stranded DNA binding protein 2		39	0.659	0.269	0.99777	0.12		1	2	1	2012	2018
Glioblastoma Multiforme	C1621958	BRCA2	675	P51587	BRCA2 DNA repair associated	Nucleic acid binding	656	0.379	0.846	2.3581e-25	0.12		1	2	2	2011	2016
Glioblastoma Multiforme	C1621958	CDKN2B-AS1	100048912		CDKN2B antisense RNA 1		213	0.491	0.769		0.11		1	4	4	2015	2018
Glioblastoma Multiforme	C1621958	POLR3B	55703	Q9NW08	RNA polymerase III subunit B	Enzyme	71	0.628	0.654	1.6812e-23	0.11		1	1	1	2015	2015
Glioblastoma Multiforme	C1621958	RPS20	6224	P60866	ribosomal protein S20	Nucleic acid binding	86	0.61	0.692	0.020686	0.11		1	1	0	2015	2015
Glioblastoma Multiforme	C1621958	HOTAIR	100124700		HOX transcript antisense RNA		234	0.475	0.769		0.1		1	10	0	2013	2018
Glioblastoma Multiforme	C1621958	HDAC6	10013	Q9UBN7	histone deacetylase 6	Epigenetic regulator	288	0.465	0.846	1	0.1		1	10	0	2011	2020
Glioblastoma Multiforme	C1621958	RTEL1-TNFRSF6B	100533107		RTEL1-TNFRSF6B readthrough (NMD candidate)		32	0.682	0.385		0.1		1	3	3	2015	2018
Glioblastoma Multiforme	C1621958	CDK4	1019	P11802	cyclin dependent kinase 4	Kinase	433	0.412	0.808	0.062909	0.1		0.962	26	1	1996	2019
Glioblastoma Multiforme	C1621958	MIR4300HG	101928989		MIR4300 host gene		7	0.839	0.077		0.1		1	1	1	2017	2017
Glioblastoma Multiforme	C1621958	TRIM13	10206	O60858	tripartite motif containing 13		275	0.462	0.846	0.6366	0.1		1	10	0	2015	2019
Glioblastoma Multiforme	C1621958	OLIG2	10215	Q13516	oligodendrocyte transcription factor 2	Enzyme	104	0.56	0.577	0.094592	0.1		1	22	0	2006	2020
Glioblastoma Multiforme	C1621958	CDKN1A	1026	P38936	cyclin dependent kinase inhibitor 1A		490	0.403	0.769	0.0018575	0.1		1	15	0	1995	2013
Glioblastoma Multiforme	C1621958	CDKN1B	1027	P46527	cyclin dependent kinase inhibitor 1B		454	0.409	0.769	0.62376	0.1		1	11	0	2000	2016
Glioblastoma Multiforme	C1621958	CDKN2A	1029	P42771;Q8N726	cyclin dependent kinase inhibitor 2A		1314	0.3	0.885	0.39474	0.1		0.969	65	4	1994	2019
Glioblastoma Multiforme	C1621958	CDKN2B	1030	P42772	cyclin dependent kinase inhibitor 2B		440	0.417	0.769	0.0073369	0.1		0.818	11	0	1994	2019
Glioblastoma Multiforme	C1621958	YAP1	10413	P46937	Yes associated protein 1	Enzyme modulator	374	0.432	0.808	0.99918	0.1		1	14	0	2011	2019
Glioblastoma Multiforme	C1621958	PRMT5	10419	O14744	protein arginine methyltransferase 5	Epigenetic regulator	131	0.539	0.769	0.99999	0.1		1	11	0	2014	2019
Glioblastoma Multiforme	C1621958	CIB1	10519	Q99828	calcium and integrin binding 1		275	0.458	0.769	0.00032612	0.1		1	10	0	2000	2016
Glioblastoma Multiforme	C1621958	AHSA1	10598	O95433	activator of HSP90 ATPase activity 1		526	0.396	0.923	0.99896	0.1		0.944	18	0	2012	2020
Glioblastoma Multiforme	C1621958	MTCO2P12	107075310		MT-CO2 pseudogene 12		703	0.368	0.962		0.1		0.9	10	0	2004	2019
Glioblastoma Multiforme	C1621958	NES	10763	P48681	nestin		302	0.45	0.808	1.6236e-06	0.1		1	30	0	2000	2019
Glioblastoma Multiforme	C1621958	LOC110806263	110806263		TERT 5' regulatory region		245	0.464	0.731		0.1		1	16	0	2013	2020
Glioblastoma Multiforme	C1621958	AZIN2	113451	Q96A70	antizyme inhibitor 2	Enzyme	187	0.499	0.808	8.8707e-07	0.1		1	11	0	2014	2019
Glioblastoma Multiforme	C1621958	H3P10	115482713		H3 histone pseudogene 10		769	0.35	0.846		0.1		0.944	18	0	1994	2019
Glioblastoma Multiforme	C1621958	COL11A2	1302	P13942	collagen type XI alpha 2 chain		399	0.435	0.846	0.70197	0.1		1	18	0	2014	2019
Glioblastoma Multiforme	C1621958	CRK	1398	P46108	CRK proto-oncogene, adaptor protein		544	0.394	0.923	0.95936	0.1		0.947	19	0	2003	2020
Glioblastoma Multiforme	C1621958	PARP1	142	P09874	poly(ADP-ribose) polymerase 1		565	0.389	0.923	0.00033366	0.1		1	26	1	2007	2019
Glioblastoma Multiforme	C1621958	MAPK14	1432	Q16539	mitogen-activated protein kinase 14	Kinase	626	0.379	0.923	0.37466	0.1		0.947	19	0	2011	2020
Glioblastoma Multiforme	C1621958	CSF2	1437	P04141	colony stimulating factor 2	Signaling	1028	0.33	0.962	0.83468	0.1		0.917	12	0	1992	2020
Glioblastoma Multiforme	C1621958	GSC	145258	P56915	goosecoid homeobox		61	0.631	0.615	0.013852	0.1		1	11	0	2012	2018
Glioblastoma Multiforme	C1621958	CTNNB1	1499	P35222	catenin beta 1		1368	0.303	0.885	0.99999	0.1		0.976	41	0	2008	2019
Glioblastoma Multiforme	C1621958	CXADR	1525	P78310	CXADR Ig-like cell adhesion molecule		305	0.454	0.885	0.36867	0.1		0.909	11	0	2005	2019
Glioblastoma Multiforme	C1621958	E2F1	1869	Q01094	E2F transcription factor 1	Nucleic acid binding	324	0.441	0.846	0.9877	0.1		1	15	0	1994	2018
Glioblastoma Multiforme	C1621958	EPHA2	1969	P29317	EPH receptor A2	Kinase	187	0.501	0.731	1.073e-05	0.1		1	12	0	2005	2019
Glioblastoma Multiforme	C1621958	EPHB2	2048	P29323	EPH receptor B2	Kinase	649	0.374	0.846	0.99997	0.1		1	31	1	1999	2020
Glioblastoma Multiforme	C1621958	AKT1	207	P31749	AKT serine/threonine kinase 1	Kinase	1250	0.311	0.962	0.9759	0.1		0.958	95	0	1998	2020
Glioblastoma Multiforme	C1621958	EZH2	2146	Q15910	enhancer of zeste 2 polycomb repressive complex 2 subunit	Epigenetic regulator	653	0.376	0.885	1	0.1		1	32	0	2008	2020
Glioblastoma Multiforme	C1621958	F3	2152	P13726	coagulation factor III, tissue factor	Receptor	456	0.415	0.846	0.018872	0.1		0.909	11	0	2005	2018
Glioblastoma Multiforme	C1621958	FGF2	2247	P09038	fibroblast growth factor 2	Signaling	635	0.383	0.923	0.0184	0.1		1	14	0	1992	2019
Glioblastoma Multiforme	C1621958	FGFR1	2260	P11362	fibroblast growth factor receptor 1	Kinase	816	0.362	0.885	0.99984	0.1		0.917	12	1	1999	2019
Glioblastoma Multiforme	C1621958	FAN1	22909	Q9Y2M0	FANCD2 and FANCI associated nuclease 1		93	0.61	0.577	1.6512e-25	0.1			0	0
Glioblastoma Multiforme	C1621958	FOXM1	2305	Q08050	forkhead box M1		323	0.441	0.769	0.0007414	0.1		1	20	0	2006	2019
Glioblastoma Multiforme	C1621958	TBC1D9	23158	Q6ZT07	TBC1 domain family member 9	Enzyme	491	0.399	0.846	2.8039e-05	0.1		0.917	12	0	1996	2016
Glioblastoma Multiforme	C1621958	FLT3LG	2323	P49771	fms related receptor tyrosine kinase 3 ligand		100	0.564	0.577	0.9404	0.1		1	10	0	2007	2018
Glioblastoma Multiforme	C1621958	SIRT1	23411	Q96EB6	sirtuin 1	Epigenetic regulator	675	0.378	0.885	0.087326	0.1		1	10	0	2014	2019
Glioblastoma Multiforme	C1621958	SLC16A8	23539	O95907	solute carrier family 16 member 8	Transporter	13	0.76	0.231	0.0089726	0.1		1	1	1	2017	2017
Glioblastoma Multiforme	C1621958	ALK	238	Q9UM73	ALK receptor tyrosine kinase	Kinase	519	0.396	0.846	3.2299e-06	0.1		0.818	11	0	2002	2020
Glioblastoma Multiforme	C1621958	GABPA	2551	Q06546	GA binding protein transcription factor subunit alpha	Transcription factor	632	0.379	0.885	0.99812	0.1		1	10	0	2013	2019
Glioblastoma Multiforme	C1621958	RNF19A	25897	Q9NV58	ring finger protein 19A, RBR E3 ubiquitin protein ligase	Enzyme	523	0.397	0.923	0.025305	0.1		0.944	18	0	2012	2020
Glioblastoma Multiforme	C1621958	POLDIP2	26073	Q9Y2S7	DNA polymerase delta interacting protein 2		530	0.396	0.923	0.41407	0.1		0.944	18	0	2012	2020
Glioblastoma Multiforme	C1621958	GFAP	2670	P14136	glial fibrillary acidic protein		447	0.421	0.885	1.4601e-06	0.1		1	29	1	1991	2020
Glioblastoma Multiforme	C1621958	GJA1	2697	P17302	gap junction protein alpha 1	Cell-cell junction	662	0.393	0.885	0.15523	0.1		1	18	0	1998	2019
Glioblastoma Multiforme	C1621958	MLH3	27030	Q9UHC1	mutL homolog 3	Nucleic acid binding	108	0.582	0.538	4.9023e-08	0.1			0	0
Glioblastoma Multiforme	C1621958	PDCD4	27250	Q53EL6	programmed cell death 4	Nucleic acid binding	198	0.494	0.769	3.3572e-07	0.1		0.929	14	0	2008	2019
Glioblastoma Multiforme	C1621958	GLI1	2735	P08151	GLI family zinc finger 1		369	0.431	0.846	7.6639e-14	0.1		1	30	0	1988	2019
Glioblastoma Multiforme	C1621958	ANGPT1	284	Q15389	angiopoietin 1	Signaling	340	0.446	0.808	0.95208	0.1		1	10	0	1998	2020
Glioblastoma Multiforme	C1621958	SETD2	29072	Q9BYW2	SET domain containing 2, histone lysine methyltransferase	Epigenetic regulator	447	0.424	0.846	1	0.1		1	12	0	2000	2018
Glioblastoma Multiforme	C1621958	CD274	29126	Q9NZQ7	CD274 molecule	Receptor	1011	0.324	0.923	0.01916	0.1		0.949	39	0	2007	2019
Glioblastoma Multiforme	C1621958	H3-3B	3021	P84243	H3.3 histone B		77	0.599	0.385	0.80682	0.1		0.929	14	0	2012	2016
Glioblastoma Multiforme	C1621958	HGF	3082	P14210	hepatocyte growth factor	Enzyme	671	0.374	0.885	0.99947	0.1		1	26	0	1995	2019
Glioblastoma Multiforme	C1621958	HMGB1	3146	P09429	high mobility group box 1	Nucleic acid binding	724	0.368	0.923	0.82035	0.1		1	10	0	2009	2019
Glioblastoma Multiforme	C1621958	HSPA4	3308	P34932	heat shock protein family A (Hsp70) member 4		550	0.394	0.923	0.99954	0.1		1	12	0	2000	2019
Glioblastoma Multiforme	C1621958	HSP90AA1	3320	P07900	heat shock protein 90 alpha family class A member 1	Chaperone	455	0.411	0.923	0.86025	0.1		1	13	0	2009	2019
Glioblastoma Multiforme	C1621958	TNC	3371	P24821	tenascin C		369	0.433	0.846	1.2592e-07	0.1		1	19	0	2001	2019
Glioblastoma Multiforme	C1621958	GADL1	339896	Q6ZQY3	glutamate decarboxylase like 1		192	0.497	0.808	1.3724e-21	0.1		1	11	0	2014	2019
Glioblastoma Multiforme	C1621958	IFNB1	3456	P01574	interferon beta 1		426	0.421	0.846		0.1		1	16	0	1991	2018
Glioblastoma Multiforme	C1621958	IFNG	3458	P01579	interferon gamma		1519	0.288	0.962	0.47156	0.1		1	17	0	1987	2019
Glioblastoma Multiforme	C1621958	IGF1	3479	P05019	insulin like growth factor 1		1206	0.318	0.885	0.2716	0.1		0.867	15	0	1994	2019
Glioblastoma Multiforme	C1621958	IGFBP2	3485	P18065	insulin like growth factor binding protein 2	Enzyme modulator	241	0.478	0.769	0.11898	0.1		1	19	0	1999	2019
Glioblastoma Multiforme	C1621958	IL4	3565	P05112	interleukin 4		996	0.332	0.962	0.0047372	0.1		1	10	1	1993	2018
Glioblastoma Multiforme	C1621958	IL4R	3566	P24394	interleukin 4 receptor	Receptor	242	0.474	0.846	0.00023013	0.1		0.9	10	2	1999	2019
Glioblastoma Multiforme	C1621958	IL6	3569	P05231	interleukin 6		2367	0.248	0.962	0.31536	0.1		0.923	39	0	1990	2019
Glioblastoma Multiforme	C1621958	IL13	3596	P35225	interleukin 13		587	0.386	0.846	0.014426	0.1		0.967	30	2	1999	2018
Glioblastoma Multiforme	C1621958	IL13RA2	3598	Q14627	interleukin 13 receptor subunit alpha 2	Signaling	103	0.556	0.654	4.021e-07	0.1		0.955	22	0	1999	2019
Glioblastoma Multiforme	C1621958	KDR	3791	P35968	kinase insert domain receptor	Kinase	623	0.378	0.885	0.99982	0.1		1	26	0	1994	2019
Glioblastoma Multiforme	C1621958	LGALS1	3956	P09382	galectin 1	Signaling	362	0.435	0.846	0.004488	0.1		1	15	0	2000	2019
Glioblastoma Multiforme	C1621958	LIG4	3981	P49917	DNA ligase 4		293	0.478	0.846	4.1635e-06	0.1		0.917	12	0	2003	2018
Glioblastoma Multiforme	C1621958	MIR10B	406903		microRNA 10b		167	0.509	0.808		0.1		1	13	0	2011	2019
Glioblastoma Multiforme	C1621958	MIR137	406928		microRNA 137		171	0.513	0.846		0.1		1	12	0	2008	2019
Glioblastoma Multiforme	C1621958	MIR145	406937		microRNA 145		366	0.431	0.846		0.1		1	13	0	2012	2019
Glioblastoma Multiforme	C1621958	MIR203A	406986		microRNA 203a		237	0.471	0.808		0.1		1	10	0	2014	2019
Glioblastoma Multiforme	C1621958	MIR21	406991		microRNA 21		726	0.363	0.846		0.1		1	62	0	2005	2020
Glioblastoma Multiforme	C1621958	ARR3	407	P36575	arrestin 3	Enzyme modulator	279	0.46	0.846	0.10401	0.1		1	10	0	2015	2019
Glioblastoma Multiforme	C1621958	MIR221	407006		microRNA 221		304	0.449	0.846		0.1		1	17	0	2005	2019
Glioblastoma Multiforme	C1621958	MIR34A	407040		microRNA 34a		428	0.421	0.846		0.1		1	12	0	2009	2019
Glioblastoma Multiforme	C1621958	EPCAM	4072	P16422	epithelial cell adhesion molecule		328	0.451	0.885	1.2844e-07	0.1			0	0
Glioblastoma Multiforme	C1621958	SMAD2	4087	Q15796	SMAD family member 2	Transcription factor	289	0.456	0.808	0.99661	0.1		1	10	0	2008	2020
Glioblastoma Multiforme	C1621958	MCL1	4170	Q07820	MCL1 apoptosis regulator, BCL2 family member	Signaling	375	0.43	0.808	0.96349	0.1		0.944	18	0	2005	2019
Glioblastoma Multiforme	C1621958	MDM2	4193	Q00987	MDM2 proto-oncogene	Nucleic acid binding	702	0.362	0.846	0.99981	0.1		0.952	42	0	1994	2019
Glioblastoma Multiforme	C1621958	MKI67	4288	P46013	marker of proliferation Ki-67		351	0.431	0.808	1.2598e-28	0.1		1	11	0	1997	2017
Glioblastoma Multiforme	C1621958	MMP14	4323	P50281	matrix metallopeptidase 14	Enzyme	340	0.447	0.769	0.99522	0.1		1	21	0	1999	2020
Glioblastoma Multiforme	C1621958	ABCC1	4363	P33527	ATP binding cassette subfamily C member 1	Transporter	333	0.445	0.808	0.0011727	0.1		1	14	0	2002	2018
Glioblastoma Multiforme	C1621958	XRCC6P5	442459		X-ray repair cross complementing 6 pseudogene 5		84	0.579	0.769		0.1		1	11	0	2009	2019
Glioblastoma Multiforme	C1621958	MSH3	4437	P20585	mutS homolog 3	Nucleic acid binding	245	0.474	0.769	7.4413e-31	0.1		1	11	0	2002	2018
Glioblastoma Multiforme	C1621958	MSI1	4440	O43347	musashi RNA binding protein 1		116	0.55	0.615	0.99357	0.1		1	12	0	2012	2020
Glioblastoma Multiforme	C1621958	COX2	4513	P00403	cytochrome c oxidase subunit II	Enzyme	875	0.352	0.962		0.1		0.917	12	0	2004	2019
Glioblastoma Multiforme	C1621958	ATM	472	Q13315	ATM serine/threonine kinase	Kinase	684	0.374	0.885	5.5884e-47	0.1		1	21	1	2000	2019
Glioblastoma Multiforme	C1621958	NFE2L2	4780	Q16236	nuclear factor, erythroid 2 like 2	Enzyme	823	0.357	0.885	0.0035719	0.1		1	14	0	2013	2019
Glioblastoma Multiforme	C1621958	PDCD1	5133	Q15116	programmed cell death 1		497	0.402	0.846	0.41706	0.1		0.909	11	0	2016	2019
Glioblastoma Multiforme	C1621958	TNFRSF12A	51330	Q9NP84	TNF receptor superfamily member 12A		173	0.509	0.692	0.017995	0.1		1	10	0	2003	2018
Glioblastoma Multiforme	C1621958	PDGFRB	5159	P09619	platelet derived growth factor receptor beta	Kinase	492	0.416	0.846	0.9041	0.1		1	19	0	1992	2018
Glioblastoma Multiforme	C1621958	ABCB1	5243	P08183	ATP binding cassette subfamily B member 1	Transporter	933	0.344	0.885	1.2564e-05	0.1		0.9	30	2	1995	2020
Glioblastoma Multiforme	C1621958	PIK3CB	5291	P42338	phosphatidylinositol-4,5-bisphosphate 3-kinase catalytic subunit beta	Kinase	1083	0.322	0.885	0.99964	0.1		0.939	147	0	2000	2020
Glioblastoma Multiforme	C1621958	PIK3CD	5293	O00329	phosphatidylinositol-4,5-bisphosphate 3-kinase catalytic subunit delta	Kinase	1119	0.319	0.885	0.99999	0.1		0.932	148	0	2000	2020
Glioblastoma Multiforme	C1621958	PIK3CG	5294	P48736	phosphatidylinositol-4,5-bisphosphate 3-kinase catalytic subunit gamma	Kinase	1101	0.32	0.885	1.4076e-06	0.1		0.938	145	1	2000	2020
Glioblastoma Multiforme	C1621958	PKM	5315	P14618	pyruvate kinase M1/2	Kinase	237	0.482	0.808	0.8549	0.1		1	11	0	2010	2020
Glioblastoma Multiforme	C1621958	PLAU	5328	P00749	plasminogen activator, urokinase	Enzyme	439	0.425	0.923	2.3058e-06	0.1		1	14	0	1994	2017
Glioblastoma Multiforme	C1621958	PLK1	5347	P53350	polo like kinase 1	Kinase	253	0.467	0.808	0.97851	0.1		1	11	0	2001	2018
Glioblastoma Multiforme	C1621958	PMS1	5378	P54277	PMS1 homolog 1, mismatch repair system component	Nucleic acid binding	115	0.569	0.654	1.3178e-17	0.1			0	0
Glioblastoma Multiforme	C1621958	POU5F1	5460	Q01860	POU class 5 homeobox 1		328	0.441	0.846	0.95371	0.1		1	10	2	2011	2019
Glioblastoma Multiforme	C1621958	PPARA	5465	Q07869	peroxisome proliferator activated receptor alpha	Nuclear receptor	408	0.432	0.885	0.030182	0.1		1	11	0	2004	2019
Glioblastoma Multiforme	C1621958	HEATR3	55027	Q7Z4Q2	HEAT repeat containing 3		27	0.7	0.231	3.5205e-07	0.1		1	1	1	2017	2017
Glioblastoma Multiforme	C1621958	RAVER2	55225	Q9HCJ3	ribonucleoprotein, PTB binding 2	Nucleic acid binding	8	0.821	0.154	1.5171e-08	0.1		1	1	1	2017	2017
Glioblastoma Multiforme	C1621958	PRKAR1A	5573	P10644	protein kinase cAMP-dependent type I regulatory subunit alpha		597	0.401	0.846	0.99985	0.1		1	10	0	2015	2019
Glioblastoma Multiforme	C1621958	AXL	558	P30530	AXL receptor tyrosine kinase	Kinase	203	0.489	0.615	0.012951	0.1		1	11	0	2012	2019
Glioblastoma Multiforme	C1621958	MAPK1	5594	P28482	mitogen-activated protein kinase 1	Kinase	1059	0.33	0.923	0.99698	0.1		0.981	54	0	1999	2020
Glioblastoma Multiforme	C1621958	MAPK3	5595	P27361	mitogen-activated protein kinase 3	Kinase	647	0.379	0.885	0.036884	0.1		1	24	0	2001	2020
Glioblastoma Multiforme	C1621958	SLC12A9	56996	Q9BXP2	solute carrier family 12 member 9	Transporter	280	0.454	0.769	1.1806e-15	0.1		1	12	0	1995	2013
Glioblastoma Multiforme	C1621958	ACKR3	57007	P25106	atypical chemokine receptor 3	G-protein coupled receptor	400	0.428	0.885	0.39134	0.1		1	10	0	2008	2018
Glioblastoma Multiforme	C1621958	PTEN	5728	P60484	phosphatase and tensin homolog	Enzyme	1349	0.305	0.923	0.25651	0.1		0.969	161	3	1997	2020
Glioblastoma Multiforme	C1621958	PTGS2	5743	P35354	prostaglandin-endoperoxide synthase 2	Enzyme	1234	0.314	0.962	0.99597	0.1		0.909	22	0	2004	2019
Glioblastoma Multiforme	C1621958	MIB1	57534	Q86YT6	mindbomb E3 ubiquitin protein ligase 1	Enzyme	329	0.438	0.769	3.3574e-88	0.1		1	11	0	1997	2017
Glioblastoma Multiforme	C1621958	PTN	5764	P21246	pleiotrophin	Signaling	164	0.515	0.808	0.0075073	0.1		1	12	0	2003	2017
Glioblastoma Multiforme	C1621958	PTPN11	5781	Q06124	protein tyrosine phosphatase non-receptor type 11		702	0.385	0.923	0.99998	0.1		1	10	1	2001	2019
Glioblastoma Multiforme	C1621958	BAX	581	Q07812	BCL2 associated X, apoptosis regulator	Signaling	420	0.417	0.885	0.31746	0.1		1	10	0	2000	2019
Glioblastoma Multiforme	C1621958	RAC1	5879	P63000	Rac family small GTPase 1	Enzyme modulator	415	0.429	0.962	0.76228	0.1		1	18	0	2002	2019
Glioblastoma Multiforme	C1621958	RAD51	5888	Q06609	RAD51 recombinase		363	0.447	0.846	0.026578	0.1		1	10	1	2011	2019
Glioblastoma Multiforme	C1621958	CCND1	595	P24385	cyclin D1	Enzyme modulator	859	0.344	0.923	0.89057	0.1		1	20	0	1991	2019
Glioblastoma Multiforme	C1621958	BCL2	596	P10415	BCL2 apoptosis regulator	Signaling	1456	0.291	0.885	0.55903	0.1		0.972	71	0	1991	2019
Glioblastoma Multiforme	C1621958	RELA	5970	Q04206	RELA proto-oncogene, NF-kB subunit	Transcription factor	483	0.406	0.885	0.99948	0.1		1	10	0	2001	2019
Glioblastoma Multiforme	C1621958	ACTB	60	P60709	actin beta	Cellular structure	1110	0.325	0.923	0.98564	0.1		1	15	0	2001	2019
Glioblastoma Multiforme	C1621958	ROS1	6098	P08922	ROS proto-oncogene 1, receptor tyrosine kinase	Kinase	356	0.439	0.885	1.6184e-72	0.1		1	14	0	1987	2019
Glioblastoma Multiforme	C1621958	CCL2	6347	P13500	C-C motif chemokine ligand 2	Signaling	1157	0.321	0.962	0.60786	0.1		1	19	0	1991	2020
Glioblastoma Multiforme	C1621958	CXCL12	6387	P48061	C-X-C motif chemokine ligand 12		626	0.379	0.846	0.11851	0.1		0.958	24	0	2000	2019
Glioblastoma Multiforme	C1621958	SEMA4A	64218	Q9H3S1	semaphorin 4A	Signaling	141	0.569	0.692	1.8394e-05	0.1			0	0
Glioblastoma Multiforme	C1621958	POU5F1P3	642559		POU class 5 homeobox 1 pseudogene 3		285	0.452	0.808		0.1		1	10	0	2011	2019
Glioblastoma Multiforme	C1621958	RHBDF1	64285	Q96CC6	rhomboid 5 homolog 1	Enzyme	41	0.67	0.308	5.4089e-15	0.1		1	1	1	2017	2017
Glioblastoma Multiforme	C1621958	POU5F1P4	645682		POU class 5 homeobox 1 pseudogene 4		284	0.452	0.808		0.1		1	10	0	2011	2019
Glioblastoma Multiforme	C1621958	WNK1	65125	Q9H4A3	WNK lysine deficient protein kinase 1	Kinase	460	0.416	0.846	1	0.1		1	10	0	2001	2019
Glioblastoma Multiforme	C1621958	SLC2A1	6513	P11166	solute carrier family 2 member 1	Transporter	687	0.388	0.808	0.9941	0.1		1	12	0	1996	2020
Glioblastoma Multiforme	C1621958	CXADRP1	653108		CXADR pseudogene 1		272	0.463	0.846		0.1		1	10	0	2015	2019
Glioblastoma Multiforme	C1621958	BMPR1A	657	P36894	bone morphogenetic protein receptor type 1A	Kinase	203	0.522	0.731	0.90333	0.1			0	0
Glioblastoma Multiforme	C1621958	SOX2	6657	P48431	SRY-box transcription factor 2	Transcription factor	503	0.405	0.808	0.70662	0.1		0.979	47	0	2009	2019
Glioblastoma Multiforme	C1621958	SPG7	6687	Q9UQ90	SPG7 matrix AAA peptidase subunit, paraplegin	Enzyme	419	0.436	0.885	1.9683e-36	0.1		1	10	0	2015	2019
Glioblastoma Multiforme	C1621958	SPP1	6696	P10451	secreted phosphoprotein 1		824	0.353	0.885	2.146e-06	0.1		1	17	0	2001	2019
Glioblastoma Multiforme	C1621958	BRAF	673	P15056	B-Raf proto-oncogene, serine/threonine kinase	Kinase	1228	0.319	0.846	0.99995	0.1		1	18	2	2008	2019
Glioblastoma Multiforme	C1621958	STAT1	6772	P42224	signal transducer and activator of transcription 1	Nucleic acid binding	531	0.399	0.885	0.99999	0.1		0.909	11	0	2012	2018
Glioblastoma Multiforme	C1621958	STAT3	6774	P40763	signal transducer and activator of transcription 3	Nucleic acid binding	1193	0.32	0.923	1	0.1		0.991	108	0	2003	2020
Glioblastoma Multiforme	C1621958	AURKA	6790	O14965	aurora kinase A	Kinase	245	0.475	0.731	0.8676	0.1		1	10	0	2010	2019
Glioblastoma Multiforme	C1621958	ZEB1	6935	P37275	zinc finger E-box binding homeobox 1	Transcription factor	310	0.442	0.808	0.96665	0.1		1	17	1	2009	2019
Glioblastoma Multiforme	C1621958	TGFB1	7040	P01137	transforming growth factor beta 1	Signaling	1558	0.287	0.962	0.03685	0.1		1	34	2	1988	2019
Glioblastoma Multiforme	C1621958	TGFB2	7042	P61812	transforming growth factor beta 2	Signaling	389	0.433	0.885	0.99905	0.1		1	13	0	1989	2019
Glioblastoma Multiforme	C1621958	TSPO	706	P30536	translocator protein		341	0.444	0.885	0.00027398	0.1		1	12	1	2009	2020
Glioblastoma Multiforme	C1621958	TNF	7124	P01375	tumor necrosis factor	Signaling	2724	0.231	0.962	0.8033	0.1		1	65	0	1993	2019
Glioblastoma Multiforme	C1621958	VIM	7431	P08670	vimentin		644	0.372	0.846	0.71255	0.1		1	15	0	2000	2019
Glioblastoma Multiforme	C1621958	WNT5A	7474	P41221	Wnt family member 5A	Signaling	375	0.443	0.808	0.98732	0.1		1	11	0	2007	2019
Glioblastoma Multiforme	C1621958	CA9	768	Q16790	carbonic anhydrase 9		226	0.483	0.731	1.3027e-09	0.1		1	12	0	2006	2020
Glioblastoma Multiforme	C1621958	CXCR4	7852	P61073	C-X-C motif chemokine receptor 4	G-protein coupled receptor	739	0.362	0.923	0.017804	0.1		1	36	0	1998	2020
Glioblastoma Multiforme	C1621958	AIMP2	7965	Q13155	aminoacyl tRNA synthetase complex interacting multifunctional protein 2		555	0.393	0.923	0.008024	0.1		0.944	18	0	2012	2020
Glioblastoma Multiforme	C1621958	COL18A1	80781	P39060	collagen type XVIII alpha 1 chain		323	0.449	0.808	1.7414e-10	0.1		1	13	0	2001	2019
Glioblastoma Multiforme	C1621958	HMGA2	8091	P52926	high mobility group AT-hook 2	Nucleic acid binding	382	0.429	0.808	0.87015	0.1		1	12	0	2004	2019
Glioblastoma Multiforme	C1621958	CASP3	836	P42574	caspase 3	Enzyme	819	0.351	0.923	0.10017	0.1		0.933	30	0	2002	2019
Glioblastoma Multiforme	C1621958	CASP8	841	Q14790	caspase 8	Enzyme	480	0.404	0.923	3.7236e-06	0.1		1	15	0	2005	2019
Glioblastoma Multiforme	C1621958	SLX4	84464	Q8IY92	SLX4 structure-specific endonuclease subunit		123	0.565	0.731	1.5676e-22	0.1			0	1
Glioblastoma Multiforme	C1621958	CASR	846	P41180	calcium sensing receptor	G-protein coupled receptor	517	0.41	0.846	0.046698	0.1		1	10	0	2015	2019
Glioblastoma Multiforme	C1621958	CAV1	857	Q03135	caveolin 1	Enzyme modulator	633	0.388	0.885	0.008274	0.1		1	13	0	2002	2019
Glioblastoma Multiforme	C1621958	TNFRSF10B	8795	O14763	TNF receptor superfamily member 10b		179	0.505	0.769	0.00019928	0.1		1	12	0	2001	2020
Glioblastoma Multiforme	C1621958	CCK	885	P06307	cholecystokinin		326	0.453	0.846	3.3034e-05	0.1		1	11	0	2017	2020
Glioblastoma Multiforme	C1621958	MBD2	8932	Q9UBB5	methyl-CpG binding domain protein 2	Epigenetic regulator	256	0.466	0.846	0.34957	0.1		1	12	0	2011	2020
Glioblastoma Multiforme	C1621958	GRAP2	9402	O75791	GRB2 related adaptor protein 2		538	0.394	0.923	0.00015256	0.1		0.944	18	0	2012	2020
Glioblastoma Multiforme	C1621958	ABCG2	9429	Q9UNQ0	ATP binding cassette subfamily G member 2 (Junior blood group)	Transporter	420	0.419	0.885	2.0957e-32	0.1		0.917	12	0	2003	2019
Glioblastoma Multiforme	C1621958	CD34	947	P28906	CD34 molecule		674	0.368	0.808	4.9881e-06	0.1		1	10	0	1994	2019
Glioblastoma Multiforme	C1621958	GDF15	9518	Q99988	growth differentiation factor 15	Signaling	389	0.429	0.808	3.0133e-07	0.1		1	12	0	2002	2019
Glioblastoma Multiforme	C1621958	CD44	960	P16070	CD44 molecule (Indian blood group)		711	0.363	0.962	2.4476e-07	0.1		1	31	0	1995	2020
Glioblastoma Multiforme	C1621958	NR1I3	9970	Q14994	nuclear receptor subfamily 1 group I member 3	Nuclear receptor	318	0.448	0.846	3.5259e-08	0.1		1	10	0	2015	2019
Glioblastoma Multiforme	C1621958	KLRC4-KLRK1	100528032	P26718	KLRC4-KLRK1 readthrough		246	0.469	0.769		0.09		1	9	0	2010	2019
Glioblastoma Multiforme	C1621958	CCN2	1490	P29279	cellular communication network factor 2	Signaling	518	0.399	0.846	0.00050202	0.09		1	9	0	2002	2017
Glioblastoma Multiforme	C1621958	DNMT1	1786	P26358	DNA methyltransferase 1	Epigenetic regulator	496	0.406	0.885	1	0.09		1	9	0	2009	2019
Glioblastoma Multiforme	C1621958	AKT2	208	P31751	AKT serine/threonine kinase 2	Kinase	264	0.474	0.769	0.64432	0.09		1	9	0	1998	2019
Glioblastoma Multiforme	C1621958	KLRK1	22914	P26718	killer cell lectin like receptor K1		255	0.467	0.769	6.9812e-14	0.09		1	9	0	2010	2019
Glioblastoma Multiforme	C1621958	FOXO3	2309	O43524	forkhead box O3		381	0.431	0.808	0.98806	0.09		1	9	0	2012	2019
Glioblastoma Multiforme	C1621958	FLT1	2321	P17948	fms related receptor tyrosine kinase 1	Kinase	424	0.419	0.846	0.99983	0.09		1	9	0	1994	2018
Glioblastoma Multiforme	C1621958	GSK3B	2932	P49841	glycogen synthase kinase 3 beta	Kinase	393	0.43	0.846	0.95571	0.09		1	9	0	2012	2019
Glioblastoma Multiforme	C1621958	ANXA2	302	P07355	annexin A2		294	0.453	0.808	9.7728e-05	0.09		1	9	0	1992	2019
Glioblastoma Multiforme	C1621958	APEX1	328	P27695	apurinic/apyrimidinic endodeoxyribonuclease 1		305	0.458	0.846	1.9191e-07	0.09		1	9	0	2011	2019
Glioblastoma Multiforme	C1621958	HSPB1	3315	P04792	heat shock protein family B (small) member 1		395	0.436	0.808	2.7797e-07	0.09		1	9	0	1993	2019
Glioblastoma Multiforme	C1621958	HTC2	3342		hypertrichosis 2 (generalized, congenital)		511	0.392	0.808		0.09		1	9	0	2005	2012
Glioblastoma Multiforme	C1621958	FAS	355	P25445	Fas cell surface death receptor		754	0.372	0.923	0.8117	0.09		0.778	9	0	1998	2019
Glioblastoma Multiforme	C1621958	AQP4	361	P55087	aquaporin 4	Ion channel	311	0.456	0.885	0.0022919	0.09		0.889	9	0	2011	2020
Glioblastoma Multiforme	C1621958	MIR222	407007		microRNA 222		210	0.486	0.808		0.09		1	9	0	2010	2019
Glioblastoma Multiforme	C1621958	MRC1	4360	P22897	mannose receptor C-type 1		431	0.413	0.846	0.94335	0.09		0.889	9	0	2004	2019
Glioblastoma Multiforme	C1621958	MYCN	4613	P04198	MYCN proto-oncogene, bHLH transcription factor	Transcription factor	314	0.454	0.808	0.88897	0.09		1	9	0	1988	2019
Glioblastoma Multiforme	C1621958	MAP2K7	5609	O14733	mitogen-activated protein kinase kinase 7	Kinase	408	0.419	0.808	0.99552	0.09		1	9	0	2010	2020
Glioblastoma Multiforme	C1621958	GORASP1	64689	Q9BQQ3	golgi reassembly stacking protein 1		369	0.428	0.846	0.019543	0.09		1	9	0	2001	2019
Glioblastoma Multiforme	C1621958	STAT5B	6777	P51692	signal transducer and activator of transcription 5B	Nucleic acid binding	357	0.442	0.808	0.99988	0.09		1	9	0	2011	2019
Glioblastoma Multiforme	C1621958	SYT1	6857	P21579	synaptotagmin 1	Transporter	460	0.412	0.846	0.60038	0.09		1	9	0	2001	2019
Glioblastoma Multiforme	C1621958	THBS1	7057	P07996	thrombospondin 1		480	0.407	0.885	0.99985	0.09		1	9	0	1999	2019
Glioblastoma Multiforme	C1621958	TXN	7295	P10599	thioredoxin		338	0.447	0.885	0.20119	0.09		1	9	0	1999	2020
Glioblastoma Multiforme	C1621958	BECN1	8678	Q14457	beclin 1	Enzyme modulator	373	0.432	0.846	0.93717	0.09		1	9	0	2012	2019
Glioblastoma Multiforme	C1621958	NRP1	8829	O14786	neuropilin 1		246	0.476	0.808	0.98584	0.09		1	9	0	2000	2018
Glioblastoma Multiforme	C1621958	CD47	961	Q08722	CD47 molecule		253	0.468	0.769	0.91924	0.09		1	9	0	2013	2019
Glioblastoma Multiforme	C1621958	HDAC9	9734	Q9UKV0	histone deacetylase 9	Epigenetic regulator	340	0.439	0.846	0.99973	0.09		1	9	2	2012	2019
Glioblastoma Multiforme	C1621958	CDK1	983	P06493	cyclin dependent kinase 1	Kinase	214	0.482	0.808	0.99206	0.09		1	9	0	1998	2019
Glioblastoma Multiforme	C1621958	TACC3	10460	Q9Y6A5	transforming acidic coiled-coil containing protein 3		62	0.615	0.615	2.7082e-07	0.08		1	8	0	2010	2018
Glioblastoma Multiforme	C1621958	LILRB1	10859	Q8NHL6	leukocyte immunoglobulin like receptor B1	Receptor	168	0.51	0.769	5.6502e-14	0.08		1	8	0	2009	2019
Glioblastoma Multiforme	C1621958	RALBP1	10928	Q15311	ralA binding protein 1	Enzyme modulator	134	0.536	0.654	0.14667	0.08		1	8	0	2009	2020
Glioblastoma Multiforme	C1621958	KLF6	1316	Q99612	Kruppel like factor 6	Nucleic acid binding	204	0.501	0.846	0.97946	0.08		0.875	8	0	2004	2017
Glioblastoma Multiforme	C1621958	AHR	196	P35869	aryl hydrocarbon receptor	Transcription factor	532	0.41	0.923	0.99999	0.08		1	8	0	2009	2019
Glioblastoma Multiforme	C1621958	EPO	2056	P01588	erythropoietin		646	0.381	0.885	0.01125	0.08		1	8	0	2007	2019
Glioblastoma Multiforme	C1621958	PTK2B	2185	Q14289	protein tyrosine kinase 2 beta	Kinase	319	0.448	0.808	0.93536	0.08		1	8	0	1998	2014
Glioblastoma Multiforme	C1621958	ATF5	22809	Q9Y2D1	activating transcription factor 5		41	0.674	0.385	0.29163	0.08		1	8	0	2006	2018
Glioblastoma Multiforme	C1621958	FOXO1	2308	Q12778	forkhead box O1		380	0.433	0.846	0.99725	0.08		1	8	0	2014	2019
Glioblastoma Multiforme	C1621958	GLS2	27165	Q9UI32	glutaminase 2	Enzyme	85	0.597	0.538	1.3239e-10	0.08		1	8	0	2014	2019
Glioblastoma Multiforme	C1621958	HSPA5	3309	P11021	heat shock protein family A (Hsp70) member 5		350	0.434	0.885	0.77341	0.08		1	8	0	2007	2018
Glioblastoma Multiforme	C1621958	HSPB2	3316	Q16082	heat shock protein family B (small) member 2		290	0.457	0.769	0.00032989	0.08		1	8	0	2008	2019
Glioblastoma Multiforme	C1621958	ICAM1	3383	P05362	intercellular adhesion molecule 1		737	0.364	0.962	0.035295	0.08		1	8	0	1990	2019
Glioblastoma Multiforme	C1621958	APOE	348	P02649	apolipoprotein E		1049	0.338	0.962	0.0018685	0.08		1	8	0	2011	2019
Glioblastoma Multiforme	C1621958	IGF1R	3480	P08069	insulin like growth factor 1 receptor	Kinase	556	0.399	0.885	0.96799	0.08		1	8	0	1999	2018
Glioblastoma Multiforme	C1621958	IL1A	3552	P01583	interleukin 1 alpha		1002	0.333	0.962	0.0001602	0.08		1	8	0	1991	2018
Glioblastoma Multiforme	C1621958	IDO1	3620	P14902	indoleamine 2,3-dioxygenase 1		295	0.454	0.846	3.3013e-06	0.08		1	8	0	2017	2019
Glioblastoma Multiforme	C1621958	ITGA5	3678	P08648	integrin subunit alpha 5		145	0.524	0.769	0.42455	0.08		1	8	0	1996	2018
Glioblastoma Multiforme	C1621958	MALAT1	378938		metastasis associated lung adenocarcinoma transcript 1		336	0.435	0.846		0.08		1	8	0	2016	2019
Glioblastoma Multiforme	C1621958	MIR139	406931		microRNA 139		138	0.527	0.808		0.08		1	8	0	2013	2019
Glioblastoma Multiforme	C1621958	MIR210	406992		microRNA 210		277	0.46	0.846		0.08		1	8	0	2013	2019
Glioblastoma Multiforme	C1621958	PPARG	5468	P37231	peroxisome proliferator activated receptor gamma	Nuclear receptor	877	0.358	0.885	0.029194	0.08		1	8	1	2000	2019
Glioblastoma Multiforme	C1621958	WEE1	7465	P30291	WEE1 G2 checkpoint kinase	Kinase	116	0.545	0.769	0.99973	0.08		1	8	0	2010	2018
Glioblastoma Multiforme	C1621958	NANOG	79923	Q9H9S0	Nanog homeobox	Transcription factor	140	0.531	0.654	0.72022	0.08		1	8	0	2010	2019
Glioblastoma Multiforme	C1621958	NR1I2	8856	O75469	nuclear receptor subfamily 1 group I member 2	Nuclear receptor	462	0.418	0.846	7.2668e-09	0.08		1	8	0	2010	2018
Glioblastoma Multiforme	C1621958	HSPB3	8988	Q12988	heat shock protein family B (small) member 3		327	0.448	0.769	6.0944e-05	0.08		1	8	0	2008	2019
Glioblastoma Multiforme	C1621958	SOCS3	9021	O14543	suppressor of cytokine signaling 3	Enzyme modulator	375	0.434	0.808	0.74613	0.08		0.875	8	0	2007	2019
Glioblastoma Multiforme	C1621958	TMED7-TICAM2	100302736	Q86XR7;Q9Y3B3	TMED7-TICAM2 readthrough		329	0.438	0.769	0.0025936	0.07		1	7	0	2002	2016
Glioblastoma Multiforme	C1621958	IL24	11009	Q13007	interleukin 24		202	0.498	0.769	5.8826e-07	0.07		1	7	0	2003	2010
Glioblastoma Multiforme	C1621958	ADM	133	P35318	adrenomedullin	Signaling	405	0.436	0.808	0.040831	0.07		1	7	0	1997	2014
Glioblastoma Multiforme	C1621958	CTSL	1514	P07711	cathepsin L	Enzyme	225	0.488	0.846	0.0080454	0.07		1	7	0	2006	2017
Glioblastoma Multiforme	C1621958	DECR1	1666	Q16698	2,4-dienoyl-CoA reductase 1	Enzyme	399	0.426	0.885	4.4689e-14	0.07		1	7	0	2010	2020
Glioblastoma Multiforme	C1621958	EDNRA	1909	P25101	endothelin receptor type A	G-protein coupled receptor	427	0.426	0.885	0.99158	0.07		1	7	0	2000	2018
Glioblastoma Multiforme	C1621958	ELAVL2	1993	Q12926	ELAV like RNA binding protein 2		199	0.486	0.808	0.99514	0.07		1	7	0	1999	2020
Glioblastoma Multiforme	C1621958	EPAS1	2034	Q99814	endothelial PAS domain protein 1	Transcription factor	293	0.454	0.731	0.5961	0.07		1	7	0	2014	2019
Glioblastoma Multiforme	C1621958	KDM1A	23028	O60341	lysine demethylase 1A	Epigenetic regulator	185	0.512	0.808	0.99667	0.07		1	7	0	2016	2019
Glioblastoma Multiforme	C1621958	FOLH1	2346	Q04609	folate hydrolase 1	Enzyme	311	0.453	0.885	6.1977e-09	0.07		1	7	0	2015	2020
Glioblastoma Multiforme	C1621958	SMUG1	23583	Q53HV7	single-strand-selective monofunctional uracil-DNA glycosylase 1		1034	0.322	0.923	0.00045154	0.07		1	7	0	2017	2020
Glioblastoma Multiforme	C1621958	GLS	2744	O94925	glutaminase	Enzyme	217	0.489	0.808	0.96154	0.07		1	7	0	2010	2019
Glioblastoma Multiforme	C1621958	ANGPT2	285	O15123	angiopoietin 2	Signaling	457	0.41	0.846	0.83208	0.07		1	7	0	1998	2019
Glioblastoma Multiforme	C1621958	GSN	2934	P06396	gelsolin	Cellular structure	262	0.475	0.885	3.8905e-11	0.07		1	7	0	1999	2018
Glioblastoma Multiforme	C1621958	HDAC1	3065	Q13547	histone deacetylase 1	Epigenetic regulator	277	0.46	0.846	0.61427	0.07		1	7	0	2016	2020
Glioblastoma Multiforme	C1621958	HLA-A	3105	P04439	major histocompatibility complex, class I, A		672	0.37	0.846	0.0013299	0.07		1	7	0	2004	2018
Glioblastoma Multiforme	C1621958	IFNA1	3439	P01562	interferon alpha 1		662	0.371	0.923		0.07		1	7	0	1996	2017
Glioblastoma Multiforme	C1621958	IFNA13	3447	P01562	interferon alpha 13		646	0.374	0.923		0.07		1	7	0	1996	2017
Glioblastoma Multiforme	C1621958	TICAM2	353376	Q86XR7;Q9Y3B3	toll like receptor adaptor molecule 2		332	0.438	0.769	0.0025936	0.07		1	7	0	2002	2016
Glioblastoma Multiforme	C1621958	JUN	3725	P05412	Jun proto-oncogene, AP-1 transcription factor subunit	Transcription factor	344	0.442	0.885	0.05962	0.07		1	7	0	2000	2019
Glioblastoma Multiforme	C1621958	KIT	3815	P10721	KIT proto-oncogene, receptor tyrosine kinase	Kinase	715	0.366	0.808	0.98087	0.07		1	7	0	1991	2017
Glioblastoma Multiforme	C1621958	LINC01194	404663		long intergenic non-protein coding RNA 1194		249	0.47	0.769		0.07		1	7	0	1996	2017
Glioblastoma Multiforme	C1621958	MMP1	4312	P03956	matrix metallopeptidase 1	Enzyme	589	0.385	0.885	7.7197e-18	0.07		1	7	0	2005	2020
Glioblastoma Multiforme	C1621958	MIR326	442900		microRNA 326		95	0.56	0.731		0.07		1	7	0	2013	2018
Glioblastoma Multiforme	C1621958	MIR340	442908		microRNA 340		99	0.561	0.692		0.07		1	7	0	2015	2019
Glioblastoma Multiforme	C1621958	P4HB	5034	P07237	prolyl 4-hydroxylase subunit beta		222	0.488	0.808	0.99662	0.07		1	7	0	1995	2019
Glioblastoma Multiforme	C1621958	SERPINE1	5054	P05121	serpin family E member 1	Enzyme modulator	770	0.359	0.885	0.043609	0.07		1	7	0	1991	2019
Glioblastoma Multiforme	C1621958	PAX6	5080	P26367	paired box 6		340	0.45	0.769	0.99975	0.07		1	7	0	2005	2019
Glioblastoma Multiforme	C1621958	TMED7	51014	Q86XR7;Q9Y3B3	transmembrane p24 trafficking protein 7	Transporter	336	0.436	0.808	0.47966	0.07		1	7	0	2002	2016
Glioblastoma Multiforme	C1621958	PCNA	5111	P12004	proliferating cell nuclear antigen	Nucleic acid binding	581	0.382	0.846	0.97606	0.07		1	7	0	2003	2019
Glioblastoma Multiforme	C1621958	SLC16A1	6566	P53985	solute carrier family 16 member 1	Transporter	195	0.499	0.846	0.00073565	0.07		1	7	0	2004	2018
Glioblastoma Multiforme	C1621958	SMN1	6606	Q16637	survival of motor neuron 1, telomeric	Epigenetic regulator	317	0.454	0.769	0.015829	0.07		1	7	0	2017	2019
Glioblastoma Multiforme	C1621958	SMN2	6607	Q16637	survival of motor neuron 2, centromeric		299	0.459	0.769	0.10337	0.07		1	7	0	2017	2019
Glioblastoma Multiforme	C1621958	SOAT1	6646	P35610	sterol O-acyltransferase 1	Enzyme	389	0.424	0.846	7.3621e-10	0.07		1	7	0	2005	2019
Glioblastoma Multiforme	C1621958	SOX9	6662	P48436	SRY-box transcription factor 9		466	0.419	0.846	0.99772	0.07		0.857	7	0	2015	2019
Glioblastoma Multiforme	C1621958	TGFA	7039	P01135	transforming growth factor alpha	Signaling	376	0.432	0.885	0.71981	0.07		1	7	0	1989	2012
Glioblastoma Multiforme	C1621958	TIMP1	7076	P01033	TIMP metallopeptidase inhibitor 1	Enzyme modulator	603	0.38	0.885	0.4993	0.07		1	7	0	2006	2019
Glioblastoma Multiforme	C1621958	TLR4	7099	O00206	toll like receptor 4		1174	0.321	0.962	4.6131e-09	0.07		1	7	0	2011	2018
Glioblastoma Multiforme	C1621958	VDAC1	7416	P21796	voltage dependent anion channel 1		116	0.556	0.654	0.97266	0.07		1	7	0	2016	2019
Glioblastoma Multiforme	C1621958	SESN2	83667	P58004	sestrin 2	Enzyme	169	0.508	0.808	4.1912e-07	0.07		1	7	0	2007	2019
Glioblastoma Multiforme	C1621958	CASP9	842	P55211	caspase 9	Enzyme	293	0.458	0.808	7.3826e-06	0.07		1	7	0	2002	2018
Glioblastoma Multiforme	C1621958	ABCC3	8714	O15438	ATP binding cassette subfamily C member 3	Transporter	160	0.517	0.769	1.2092e-26	0.07		1	7	0	2002	2019
Glioblastoma Multiforme	C1621958	RIPK1	8737	Q13546	receptor interacting serine/threonine kinase 1	Kinase	250	0.479	0.769	0.0079441	0.07		1	7	0	2009	2018
Glioblastoma Multiforme	C1621958	MTDH	92140	Q86UE4	metadherin		200	0.491	0.769	0.32924	0.07		1	7	0	2011	2019
Glioblastoma Multiforme	C1621958	CD163	9332	Q86VB7	CD163 molecule	Enzyme	369	0.427	0.846	0.0008338	0.07		1	7	0	2012	2019
Glioblastoma Multiforme	C1621958	MELK	9833	Q14680	maternal embryonic leucine zipper kinase	Kinase	94	0.566	0.577	4.5055e-22	0.07		1	7	0	2008	2015
Glioblastoma Multiforme	C1621958	COMMD3-BMI1	100532731	P35226	COMMD3-BMI1 readthrough		202	0.488	0.769	0.0014998	0.06		1	6	0	2010	2019
Glioblastoma Multiforme	C1621958	CCNO	10309	P22674	cyclin O	Enzyme modulator	67	0.621	0.538	0.003548	0.06		1	6	0	2011	2018
Glioblastoma Multiforme	C1621958	CEBPB	1051	P17676	CCAAT enhancer binding protein beta	Transcription factor	182	0.508	0.731	0.35809	0.06		1	6	0	2012	2018
Glioblastoma Multiforme	C1621958	ZNRD2	10534	O60232	zinc ribbon domain containing 2		311	0.443	0.769	1.8426e-07	0.06		1	6	0	2002	2016
Glioblastoma Multiforme	C1621958	POSTN	10631	Q15063	periostin	Signaling	378	0.428	0.885	1.0666e-09	0.06		1	6	0	2011	2020
Glioblastoma Multiforme	C1621958	CXCR6	10663	O00574	C-X-C motif chemokine receptor 6	G-protein coupled receptor	325	0.448	0.885	5.7212e-05	0.06		1	6	0	2008	2018
Glioblastoma Multiforme	C1621958	DCTN6	10671	O00399	dynactin subunit 6	Cellular structure	315	0.442	0.769	0.055741	0.06		1	6	0	2002	2016
Glioblastoma Multiforme	C1621958	H3P23	115482696		H3 histone pseudogene 23		310	0.443	0.769		0.06		1	6	0	2002	2016
Glioblastoma Multiforme	C1621958	CMA1	1215	P23946	chymase 1	Enzyme	157	0.514	0.692	7.5861e-09	0.06		1	6	0	2004	2018
Glioblastoma Multiforme	C1621958	CREB1	1385	P16220	cAMP responsive element binding protein 1		294	0.463	0.885	0.99673	0.06		1	6	0	2004	2019
Glioblastoma Multiforme	C1621958	CSPG4	1464	Q6UVK1	chondroitin sulfate proteoglycan 4		75	0.599	0.615	2.6212e-05	0.06		1	6	0	2011	2019
Glioblastoma Multiforme	C1621958	ADRA1A	148	P35348	adrenoceptor alpha 1A	G-protein coupled receptor	294	0.462	0.846	3.3722e-07	0.06		1	6	0	2008	2018
Glioblastoma Multiforme	C1621958	CTLA4	1493	P16410	cytotoxic T-lymphocyte associated protein 4		722	0.369	0.923	0.94085	0.06		1	6	0	2012	2019
Glioblastoma Multiforme	C1621958	ADRA2B	151	P18089	adrenoceptor alpha 2B	G-protein coupled receptor	296	0.465	0.846	4.4533e-06	0.06		1	6	0	2008	2018
Glioblastoma Multiforme	C1621958	DMBT1	1755	Q9UGM3	deleted in malignant brain tumors 1	Enzyme	135	0.533	0.654	4.476e-63	0.06		0.833	6	0	1999	2006
Glioblastoma Multiforme	C1621958	ATN1	1822	P54259	atrophin 1		499	0.409	0.885	0.99992	0.06		1	6	0	2014	2020
Glioblastoma Multiforme	C1621958	EDN1	1906	P05305	endothelin 1	Signaling	679	0.38	0.846	0.45504	0.06		1	6	0	2000	2006
Glioblastoma Multiforme	C1621958	EGR1	1958	P18146	early growth response 1	Nucleic acid binding	378	0.433	0.923	0.3509	0.06		1	6	0	1995	2019
Glioblastoma Multiforme	C1621958	EPHA3	2042	P29320	EPH receptor A3	Kinase	193	0.497	0.692	1.1953e-05	0.06		1	6	0	2013	2019
Glioblastoma Multiforme	C1621958	ERBB3	2065	P21860	erb-b2 receptor tyrosine kinase 3	Kinase	318	0.448	0.808	1.7003e-15	0.06		1	6	0	2006	2020
Glioblastoma Multiforme	C1621958	ESR2	2100	Q92731	estrogen receptor 2	Nuclear receptor	528	0.4	0.923	4.4516e-08	0.06		1	6	0	2016	2019
Glioblastoma Multiforme	C1621958	ALB	213	P02768	albumin	Transporter	1198	0.317	0.962	0.64329	0.06		1	6	0	2017	2019
Glioblastoma Multiforme	C1621958	F2R	2149	P25116	coagulation factor II thrombin receptor	G-protein coupled receptor	347	0.444	0.846	0.0084678	0.06		1	6	0	2010	2020
Glioblastoma Multiforme	C1621958	FGFR3	2261	P22607	fibroblast growth factor receptor 3	Kinase	654	0.391	0.846	1.6432e-05	0.06		1	6	0	2012	2018
Glioblastoma Multiforme	C1621958	FOS	2353	P01100	Fos proto-oncogene, AP-1 transcription factor subunit	Transcription factor	528	0.411	0.885	0.26176	0.06		1	6	0	1995	2018
Glioblastoma Multiforme	C1621958	FOSB	2354	P53539	FosB proto-oncogene, AP-1 transcription factor subunit	Transcription factor	278	0.463	0.846	0.97553	0.06		1	6	0	2000	2018
Glioblastoma Multiforme	C1621958	LRIG1	26018	Q96JA1	leucine rich repeats and immunoglobulin like domains 1	Receptor	83	0.601	0.538	0.035031	0.06		1	6	0	2008	2018
Glioblastoma Multiforme	C1621958	MCAT	27349	Q8IVS2	malonyl-CoA-acyl carrier protein transacylase		147	0.524	0.808	0.00030611	0.06		1	6	0	2004	2018
Glioblastoma Multiforme	C1621958	GPR42	2866	O15529	G protein-coupled receptor 42 (gene/pseudogene)	G-protein coupled receptor	255	0.475	0.846	0.050905	0.06		1	6	0	2008	2018
Glioblastoma Multiforme	C1621958	MCTS1	28985	Q9ULC4	MCTS1 re-initiation and release factor	Receptor	109	0.552	0.692	0.87474	0.06		1	6	0	2004	2018
Glioblastoma Multiforme	C1621958	ADGRE2	30817	Q9UHX3	adhesion G protein-coupled receptor E2	G-protein coupled receptor	86	0.581	0.615	2.7615e-28	0.06		0.667	6	0	2011	2015
Glioblastoma Multiforme	C1621958	HMGA1	3159	P17096	high mobility group AT-hook 1	Nucleic acid binding	206	0.494	0.769	0.83209	0.06		1	6	0	2011	2019
Glioblastoma Multiforme	C1621958	HMOX1	3162	P09601	heme oxygenase 1		666	0.381	0.923	0.0096817	0.06		1	6	0	1996	2019
Glioblastoma Multiforme	C1621958	HSPA1A	3303	P0DMV8;P0DMV9	heat shock protein family A (Hsp70) member 1A		229	0.486	0.769	0.030228	0.06		1	6	0	1994	2013
Glioblastoma Multiforme	C1621958	HSPA1B	3304	P0DMV8;P0DMV9	heat shock protein family A (Hsp70) member 1B		251	0.474	0.808	0.0053464	0.06		1	6	0	1994	2013
Glioblastoma Multiforme	C1621958	XIAP	331	P98170	X-linked inhibitor of apoptosis	Enzyme modulator	321	0.447	0.808	0.91837	0.06		1	6	0	2010	2017
Glioblastoma Multiforme	C1621958	IFI27	3429	P40305	interferon alpha inducible protein 27		332	0.437	0.769	0.010698	0.06		1	6	0	2002	2016
Glioblastoma Multiforme	C1621958	CCN1	3491	O00622	cellular communication network factor 1	Signaling	246	0.473	0.731	0.71388	0.06		1	6	0	2004	2017
Glioblastoma Multiforme	C1621958	FASLG	356	P48023	Fas ligand	Signaling	398	0.43	0.885	0.18345	0.06		1	6	0	2008	2019
Glioblastoma Multiforme	C1621958	IL10	3586	P22301	interleukin 10		1679	0.281	0.923	0.0058874	0.06		1	6	1	1994	2020
Glioblastoma Multiforme	C1621958	ILK	3611	Q13418	integrin linked kinase	Kinase	192	0.503	0.769	3.7887e-05	0.06		1	6	0	2004	2017
Glioblastoma Multiforme	C1621958	ITGAV	3685	P06756	integrin subunit alpha V		141	0.526	0.769	0.00022844	0.06		1	6	0	1996	2018
Glioblastoma Multiforme	C1621958	JAK2	3717	O60674	Janus kinase 2	Kinase	644	0.385	0.885	0.65372	0.06		1	6	0	2011	2020
Glioblastoma Multiforme	C1621958	LGALS3	3958	P17931	galectin 3	Signaling	557	0.392	0.846	2.3207e-05	0.06		1	6	2	2004	2020
Glioblastoma Multiforme	C1621958	MIR155	406947		microRNA 155		584	0.384	0.885		0.06		1	6	0	2009	2017
Glioblastoma Multiforme	C1621958	MIR182	406958		microRNA 182		211	0.486	0.846		0.06		1	6	0	2015	2018
Glioblastoma Multiforme	C1621958	MIR29A	407021		microRNA 29a		278	0.459	0.808		0.06		1	6	0	2015	2019
Glioblastoma Multiforme	C1621958	MIR7-1	407043		microRNA 7-1		52	0.628	0.692		0.06		1	6	0	2014	2019
Glioblastoma Multiforme	C1621958	MIR7-2	407044		microRNA 7-2		54	0.623	0.692		0.06		1	6	0	2014	2019
Glioblastoma Multiforme	C1621958	MIR7-3	407045		microRNA 7-3		53	0.626	0.692		0.06		1	6	0	2014	2019
Glioblastoma Multiforme	C1621958	SMAD3	4088	P84022	SMAD family member 3	Transcription factor	470	0.415	0.923	0.79796	0.06		1	6	0	2015	2019
Glioblastoma Multiforme	C1621958	STS	412	P08842	steroid sulfatase	Enzyme	382	0.431	0.846	0.80886	0.06		1	6	0	2004	2019
Glioblastoma Multiforme	C1621958	MIF	4282	P14174	macrophage migration inhibitory factor		455	0.412	0.885	0.012262	0.06		1	6	0	2003	2018
Glioblastoma Multiforme	C1621958	ASCL1	429	P50553	achaete-scute family bHLH transcription factor 1	Transcription factor	136	0.552	0.692	0.67692	0.06		1	6	0	2005	2019
Glioblastoma Multiforme	C1621958	ASL	435	P04424	argininosuccinate lyase	Enzyme	99	0.593	0.731	8.5727e-10	0.06		1	6	0	2013	2020
Glioblastoma Multiforme	C1621958	MIR338	442906		microRNA 338		128	0.535	0.808		0.06		0.833	6	0	2016	2018
Glioblastoma Multiforme	C1621958	MXI1	4601	P50539	MAX interactor 1, dimerization protein	Transcription factor	128	0.547	0.615	0.0011217	0.06		1	6	0	1997	2016
Glioblastoma Multiforme	C1621958	NT5E	4907	P21589	5'-nucleotidase ecto	Enzyme	376	0.436	0.885	2.2881e-11	0.06		1	6	0	2013	2020
Glioblastoma Multiforme	C1621958	NTRK1	4914	P04629	neurotrophic receptor tyrosine kinase 1	Kinase	443	0.422	0.808	1.9568e-06	0.06		1	6	0	1999	2018
Glioblastoma Multiforme	C1621958	OSM	5008	P13725	oncostatin M	Signaling	188	0.505	0.769	0.58916	0.06		1	6	0	2000	2017
Glioblastoma Multiforme	C1621958	PECAM1	5175	P16284	platelet and endothelial cell adhesion molecule 1	Cell adhesion	396	0.426	0.846		0.06		1	6	0	2014	2018
Glioblastoma Multiforme	C1621958	PLG	5340	P00747	plasminogen	Enzyme	586	0.389	0.923	0.010345	0.06		1	6	0	1986	2015
Glioblastoma Multiforme	C1621958	POLD1	5424	P28340	DNA polymerase delta 1, catalytic subunit		189	0.507	0.769	2.4179e-06	0.06		1	6	0	1998	2019
Glioblastoma Multiforme	C1621958	AJAP1	55966	Q9UKB5	adherens junctions associated protein 1		26	0.722	0.192	0.99469	0.06		1	6	0	2009	2018
Glioblastoma Multiforme	C1621958	PRNP	5621	F7VJQ1;P04156	prion protein		426	0.445	0.923	0.00063182	0.06		1	6	0	2008	2019
Glioblastoma Multiforme	C1621958	PSMD9	5715	O00233	proteasome 26S subunit, non-ATPase 9	Enzyme modulator	344	0.435	0.846	4.8603e-06	0.06		1	6	0	2002	2016
Glioblastoma Multiforme	C1621958	RAF1	5894	P04049	Raf-1 proto-oncogene, serine/threonine kinase	Kinase	470	0.418	0.885	0.85295	0.06		1	6	0	1989	2014
Glioblastoma Multiforme	C1621958	REST	5978	Q13127	RE1 silencing transcription factor	Transcription factor	178	0.535	0.808	0.99186	0.06		1	6	0	2012	2018
Glioblastoma Multiforme	C1621958	ROCK1	6093	Q13464	Rho associated coiled-coil containing protein kinase 1	Kinase	157	0.513	0.731	1	0.06		1	6	0	2013	2018
Glioblastoma Multiforme	C1621958	RRM2	6241	P31350	ribonucleotide reductase regulatory subunit M2	Enzyme	101	0.555	0.769	0.2964	0.06		1	6	0	2016	2019
Glioblastoma Multiforme	C1621958	CCL5	6352	P13501	C-C motif chemokine ligand 5	Signaling	514	0.403	0.885	0.0017516	0.06		1	6	0	2011	2019
Glioblastoma Multiforme	C1621958	SGK1	6446	O00141	serum/glucocorticoid regulated kinase 1	Kinase	188	0.506	0.769	0.0023046	0.06		1	6	0	2017	2019
Glioblastoma Multiforme	C1621958	SNAI1	6615	O95863	snail family transcriptional repressor 1		243	0.474	0.808	0.21754	0.06		1	6	0	2011	2018
Glioblastoma Multiforme	C1621958	SPARC	6678	P09486	secreted protein acidic and cysteine rich	Signaling	344	0.445	0.846	0.89148	0.06		1	6	0	2005	2012
Glioblastoma Multiforme	C1621958	SRC	6714	P12931	SRC proto-oncogene, non-receptor tyrosine kinase	Kinase	265	0.467	0.885	0.99691	0.06		1	6	0	2005	2019
Glioblastoma Multiforme	C1621958	BRCA1	672	P38398	BRCA1 DNA repair associated	Enzyme	747	0.367	0.923	9.2157e-29	0.06		1	6	0	2008	2019
Glioblastoma Multiforme	C1621958	SSTR4	6754	P31391	somatostatin receptor 4	G-protein coupled receptor	273	0.469	0.846	3.6978e-13	0.06		1	6	0	2008	2018
Glioblastoma Multiforme	C1621958	STAT5A	6776	P42229	signal transducer and activator of transcription 5A	Nucleic acid binding	318	0.445	0.808	0.99994	0.06		1	6	1	2011	2018
Glioblastoma Multiforme	C1621958	BRS3	680	P32247	bombesin receptor subtype 3	G-protein coupled receptor	261	0.474	0.846	0.94849	0.06		1	6	0	2008	2018
Glioblastoma Multiforme	C1621958	TACR1	6869	P25103	tachykinin receptor 1	G-protein coupled receptor	217	0.502	0.885	0.00038437	0.06		1	6	0	2005	2018
Glioblastoma Multiforme	C1621958	TAZ	6901	Q16635	tafazzin	Enzyme	252	0.477	0.808	0.72591	0.06		1	6	0	2011	2017
Glioblastoma Multiforme	C1621958	TFRC	7037	P02786	transferrin receptor	Enzyme	359	0.437	0.885	6.9902e-05	0.06		1	6	0	2015	2020
Glioblastoma Multiforme	C1621958	TIMP2	7077	P16035	TIMP metallopeptidase inhibitor 2	Enzyme modulator	404	0.425	0.846	0.78893	0.06		1	6	0	2001	2017
Glioblastoma Multiforme	C1621958	TP73	7161	O15350	tumor protein p73	Transcription factor	300	0.449	0.808	0.99696	0.06		0.833	6	2	2001	2020
Glioblastoma Multiforme	C1621958	TTK	7272	P33981	TTK protein kinase	Kinase	112	0.555	0.731	0.0012734	0.06		1	6	0	2013	2019
Glioblastoma Multiforme	C1621958	UQCRFS1	7386	P47985	ubiquinol-cytochrome c reductase, Rieske iron-sulfur polypeptide 1		109	0.558	0.654	0.18923	0.06		1	6	0	2009	2018
Glioblastoma Multiforme	C1621958	TFPI2	7980	P48307	tissue factor pathway inhibitor 2	Enzyme modulator	161	0.521	0.769	0.00084274	0.06		1	6	0	2005	2019
Glioblastoma Multiforme	C1621958	CD276	80381	Q5ZPR3	CD276 molecule	Enzyme modulator	169	0.505	0.731	2.4699e-09	0.06		1	6	0	2012	2019
Glioblastoma Multiforme	C1621958	BCL2L12	83596	Q9HB09	BCL2 like 12		67	0.606	0.654	3.8273e-09	0.06		1	6	0	2007	2015
Glioblastoma Multiforme	C1621958	CFLAR	8837	O15519	CASP8 and FADD like apoptosis regulator	Enzyme	215	0.485	0.846	0.99967	0.06		1	6	0	2005	2019
Glioblastoma Multiforme	C1621958	ARHGEF7	8874	Q14155	Rho guanine nucleotide exchange factor 7		215	0.486	0.846	0.99995	0.06		1	6	0	2008	2019
Glioblastoma Multiforme	C1621958	SPHK1	8877	Q9NYA1	sphingosine kinase 1	Kinase	236	0.48	0.808	3.0327e-07	0.06		0.833	6	0	2005	2018
Glioblastoma Multiforme	C1621958	SQSTM1	8878	Q13501	sequestosome 1		470	0.428	0.885	0.00086035	0.06		1	6	0	2013	2019
Glioblastoma Multiforme	C1621958	LPAR2	9170	Q9HBW0	lysophosphatidic acid receptor 2	G-protein coupled receptor	285	0.463	0.846	0.036658	0.06		1	6	0	2008	2018
Glioblastoma Multiforme	C1621958	DNER	92737	Q8NFT8	delta/notch like EGF repeat containing		203	0.493	0.769	0.1859	0.06		1	6	0	2014	2019
Glioblastoma Multiforme	C1621958	KLF4	9314	O43474	Kruppel like factor 4	Nucleic acid binding	307	0.449	0.769	0.99714	0.06		1	6	0	2016	2019
Glioblastoma Multiforme	C1621958	CD40	958	P25942	CD40 molecule		528	0.396	0.846	0.84603	0.06		1	6	0	2012	2019
Glioblastoma Multiforme	C1621958	CDC42	998	P60953	cell division cycle 42	Enzyme modulator	327	0.458	0.846	0.78728	0.06		1	6	0	2012	2014
Glioblastoma Multiforme	C1621958	LINC01672	100505887		long intergenic non-protein coding RNA 1672		268	0.462	0.846		0.05		1	5	0	2016	2019
Glioblastoma Multiforme	C1621958	TUBB3	10381	Q13509	tubulin beta 3 class III	Cellular structure	259	0.486	0.808	2.5676e-10	0.05		1	5	0	2007	2019
Glioblastoma Multiforme	C1621958	ADARB1	104	P78563	adenosine deaminase RNA specific B1	Enzyme	85	0.588	0.654	0.80347	0.05		1	5	0	2007	2018
Glioblastoma Multiforme	C1621958	HPSE	10855	Q9Y251	heparanase	Enzyme	393	0.425	0.808	2.266e-14	0.05		1	5	0	2005	2017
Glioblastoma Multiforme	C1621958	DSTN	11034	P60981	destrin, actin depolymerizing factor		48	0.644	0.692	0.55116	0.05		1	5	0	1999	2017
Glioblastoma Multiforme	C1621958	NUDT21	11051	O43809	nudix hydrolase 21	Nucleic acid binding	32	0.682	0.231	0.98576	0.05		1	5	0	2014	2019
Glioblastoma Multiforme	C1621958	PTPRT	11122	O14522	protein tyrosine phosphatase receptor type T	Enzyme	53	0.636	0.538	1	0.05		1	5	0	2005	2016
Glioblastoma Multiforme	C1621958	FSTL1	11167	Q12841	follistatin like 1	Enzyme modulator	128	0.541	0.808	0.89403	0.05		1	5	0	2008	2019
Glioblastoma Multiforme	C1621958	PRRT2	112476	Q7Z6L0	proline rich transmembrane protein 2		353	0.448	0.808	0.57919	0.05		1	5	0	2006	2018
Glioblastoma Multiforme	C1621958	CLIC1	1192	O00299	chloride intracellular channel 1	Ion channel	74	0.601	0.5	0.00019265	0.05		1	5	0	2017	2019
Glioblastoma Multiforme	C1621958	CCR5	1234	P51681	C-C motif chemokine receptor 5 (gene/pseudogene)	G-protein coupled receptor	508	0.398	0.885	4.3094e-10	0.05		1	5	0	2005	2019
Glioblastoma Multiforme	C1621958	COX8A	1351	P10176	cytochrome c oxidase subunit 8A	Enzyme	526	0.4	0.846	0.11606	0.05		1	5	0	2001	2019
Glioblastoma Multiforme	C1621958	PWAR1	145624		Prader Willi/Angelman region RNA 1		246	0.49	0.769		0.05		1	5	0	2010	2018
Glioblastoma Multiforme	C1621958	DRD2	1813	P14416	dopamine receptor D2	G-protein coupled receptor	437	0.436	0.846	0.74709	0.05		1	5	0	2014	2020
Glioblastoma Multiforme	C1621958	EPHA1	2041	P21709	EPH receptor A1	Kinase	119	0.544	0.731	1.4624e-23	0.05		1	5	0	2004	2019
Glioblastoma Multiforme	C1621958	FABP7	2173	O15540	fatty acid binding protein 7		82	0.584	0.577	0.00078595	0.05		1	5	0	2006	2019
Glioblastoma Multiforme	C1621958	MPEG1	219972	Q2M385	macrophage expressed 1		98	0.575	0.731	3.5925e-16	0.05		1	5	0	2013	2019
Glioblastoma Multiforme	C1621958	ALDH1A3	220	P47895	aldehyde dehydrogenase 1 family member A3	Enzyme	83	0.578	0.654	0.14128	0.05		1	5	0	2015	2019
Glioblastoma Multiforme	C1621958	EFEMP1	2202	Q12805	EGF containing fibulin extracellular matrix protein 1	Extracellular structure	153	0.54	0.769	0.99992	0.05		1	5	1	2011	2018
Glioblastoma Multiforme	C1621958	FOXG1	2290	P55316	forkhead box G1		224	0.522	0.692	0.94355	0.05		1	5	0	2012	2018
Glioblastoma Multiforme	C1621958	WWTR1	25937	Q9GZV5	WW domain containing transcription regulator 1	Enzyme modulator	134	0.529	0.615	0.93914	0.05		1	5	0	2011	2019
Glioblastoma Multiforme	C1621958	BBC3	27113	Q96PG8;Q9BXH1	BCL2 binding component 3		157	0.517	0.769	0.0039762	0.05		1	5	0	2008	2018
Glioblastoma Multiforme	C1621958	DKK3	27122	Q9UBP4	dickkopf WNT signaling pathway inhibitor 3		186	0.5	0.731	4.1049e-06	0.05		1	5	0	1997	2015
Glioblastoma Multiforme	C1621958	HPGDS	27306	O60760	hematopoietic prostaglandin D synthase		570	0.388	0.923	1.8063e-06	0.05		1	5	0	1997	2008
Glioblastoma Multiforme	C1621958	EEF2K	29904	O00418	eukaryotic elongation factor 2 kinase	Kinase	52	0.641	0.385	8.3628e-20	0.05		1	5	0	2006	2016
Glioblastoma Multiforme	C1621958	HK2	3099	P52789	hexokinase 2	Kinase	152	0.515	0.769	0.0045893	0.05		1	5	0	2011	2019
Glioblastoma Multiforme	C1621958	HSF1	3297	Q00613	heat shock transcription factor 1	Transcription factor	185	0.507	0.769	0.74762	0.05		1	5	0	2011	2018
Glioblastoma Multiforme	C1621958	IDUA	3425	P35475	alpha-L-iduronidase	Enzyme	258	0.499	0.846	3.7599e-13	0.05		1	5	0	2013	2019
Glioblastoma Multiforme	C1621958	IGFBP3	3486	P17936	insulin like growth factor binding protein 3	Enzyme modulator	350	0.439	0.808	0.91029	0.05		1	5	0	1999	2014
Glioblastoma Multiforme	C1621958	IGFBP7	3490	Q16270	insulin like growth factor binding protein 7		241	0.476	0.769	0.0012873	0.05		1	5	0	2007	2019
Glioblastoma Multiforme	C1621958	APRT	353	P07741	adenine phosphoribosyltransferase		384	0.423	0.846	5.4539e-13	0.05		1	5	0	2006	2018
Glioblastoma Multiforme	C1621958	JUNB	3726	P17275	JunB proto-oncogene, AP-1 transcription factor subunit	Transcription factor	264	0.467	0.769	0.86299	0.05		1	5	0	2000	2018
Glioblastoma Multiforme	C1621958	JUND	3727	P17535	JunD proto-oncogene, AP-1 transcription factor subunit	Transcription factor	242	0.475	0.808	0.70054	0.05		1	5	0	2000	2018
Glioblastoma Multiforme	C1621958	L1CAM	3897	P32004	L1 cell adhesion molecule		289	0.475	0.769	1	0.05		1	5	0	2011	2019
Glioblastoma Multiforme	C1621958	LAMC2	3918	Q13753	laminin subunit gamma 2	Enzyme modulator	602	0.389	0.923	2.8791e-12	0.05		1	5	0	2017	2020
Glioblastoma Multiforme	C1621958	MIR134	406924		microRNA 134		126	0.542	0.769		0.05		1	5	0	2013	2019
Glioblastoma Multiforme	C1621958	MIR141	406933		microRNA 141		179	0.497	0.808		0.05		1	5	0	2016	2019
Glioblastoma Multiforme	C1621958	MIR146A	406938		microRNA 146a		505	0.398	0.885		0.05		1	5	1	2015	2016
Glioblastoma Multiforme	C1621958	MIR148A	406940		microRNA 148a		172	0.506	0.846		0.05		1	5	0	2014	2019
Glioblastoma Multiforme	C1621958	MIR195	406971		microRNA 195		180	0.496	0.769		0.05		1	5	0	2010	2019
Glioblastoma Multiforme	C1621958	MIR223	407008		microRNA 223		348	0.433	0.808		0.05		1	5	0	2013	2018
Glioblastoma Multiforme	C1621958	MIR29B1	407024		microRNA 29b-1		212	0.485	0.846		0.05		1	5	0	2010	2017
Glioblastoma Multiforme	C1621958	MIR31	407035		microRNA 31		235	0.471	0.769		0.05		1	5	0	2012	2018
Glioblastoma Multiforme	C1621958	MAOB	4129	P27338	monoamine oxidase B		152	0.533	0.808	0.99903	0.05		1	5	0	2010	2019
Glioblastoma Multiforme	C1621958	MFAP1	4236	P55081	microfibril associated protein 1	Extracellular structure	357	0.431	0.846	0.79602	0.05		1	5	0	2006	2018
Glioblastoma Multiforme	C1621958	ASAH1	427	Q13510	N-acylsphingosine amidohydrolase 1	Enzyme	176	0.526	0.808	1.2588e-12	0.05		1	5	0	2017	2019
Glioblastoma Multiforme	C1621958	NCL	4691	P19338	nucleolin	Nucleic acid binding	167	0.509	0.808	0.99992	0.05		1	5	0	2012	2018
Glioblastoma Multiforme	C1621958	NF2	4771	P35240	neurofibromin 2		312	0.468	0.885	1	0.05		0.8	5	0	2011	2017
Glioblastoma Multiforme	C1621958	NFKB1	4790	P19838	nuclear factor kappa B subunit 1	Transcription factor	551	0.396	0.923	1	0.05		1	5	0	2011	2019
Glioblastoma Multiforme	C1621958	NTSR1	4923	P30989	neurotensin receptor 1	G-protein coupled receptor	124	0.563	0.692	1.928e-08	0.05		1	5	0	2014	2018
Glioblastoma Multiforme	C1621958	PAEP	5047	P09466	progestagen associated endometrial protein	Enzyme	397	0.43	0.846	3.1109e-08	0.05		1	5	0	2012	2019
Glioblastoma Multiforme	C1621958	IL22	50616	Q9GZX6	interleukin 22		551	0.393	0.885	0.00018843	0.05		1	5	0	2007	2019
Glioblastoma Multiforme	C1621958	TLR9	54106	Q9NR96	toll like receptor 9		457	0.411	0.885	9.8117e-06	0.05		1	5	0	2008	2019
Glioblastoma Multiforme	C1621958	TRPM7	54822	Q96QT4	transient receptor potential cation channel subfamily M member 7	Ion channel	151	0.531	0.731	5.2086e-16	0.05		1	5	0	2015	2018
Glioblastoma Multiforme	C1621958	PRKAA1	5562	Q13131	protein kinase AMP-activated catalytic subunit alpha 1	Kinase	325	0.453	0.846	0.13725	0.05		1	5	0	2017	2020
Glioblastoma Multiforme	C1621958	PRKAA2	5563	P54646	protein kinase AMP-activated catalytic subunit alpha 2	Kinase	317	0.456	0.846	3.5282e-08	0.05		1	5	0	2017	2020
Glioblastoma Multiforme	C1621958	PRKAB1	5564	Q9Y478	protein kinase AMP-activated non-catalytic subunit beta 1	Kinase	296	0.46	0.846	0.0052573	0.05		1	5	0	2017	2020
Glioblastoma Multiforme	C1621958	PBK	55872	Q96KB5	PDZ binding kinase	Kinase	121	0.541	0.769	1.2188e-06	0.05		1	5	0	2015	2020
Glioblastoma Multiforme	C1621958	MIR146B	574447		microRNA 146b		187	0.496	0.769		0.05		0.8	5	0	2009	2018
Glioblastoma Multiforme	C1621958	MIR181D	574457		microRNA 181d		44	0.641	0.654		0.05		1	5	0	2012	2019
Glioblastoma Multiforme	C1621958	NDRG2	57447	Q9UN36	NDRG family member 2	Enzyme	156	0.518	0.692	2.2044e-05	0.05		1	5	0	2003	2016
Glioblastoma Multiforme	C1621958	SEMA6A	57556	Q9H2E6	semaphorin 6A	Signaling	211	0.486	0.808	0.99976	0.05		1	5	0	2014	2018
Glioblastoma Multiforme	C1621958	PTPRZ1	5803	P23471	protein tyrosine phosphatase receptor type Z1	Enzyme	61	0.623	0.615	0.98997	0.05		1	5	0	2005	2017
Glioblastoma Multiforme	C1621958	PVR	5817	P15151	PVR cell adhesion molecule		177	0.51	0.769	3.922e-10	0.05		1	5	0	2006	2019
Glioblastoma Multiforme	C1621958	RPS27	6232	P42677	ribosomal protein S27	Nucleic acid binding	104	0.578	0.769	0.75663	0.05		1	5	0	2013	2019
Glioblastoma Multiforme	C1621958	BDNF	627	P23560	brain derived neurotrophic factor	Signaling	992	0.345	0.923	0.65626	0.05		1	5	0	1999	2019
Glioblastoma Multiforme	C1621958	SATB1	6304	Q01826	SATB homeobox 1	Transcription factor	147	0.525	0.769	0.99051	0.05		0.8	5	0	2013	2019
Glioblastoma Multiforme	C1621958	GOLPH3	64083	Q9H4A6	golgi phosphoprotein 3		140	0.53	0.808	0.23586	0.05		1	5	0	2011	2019
Glioblastoma Multiforme	C1621958	SLC12A2	6558	P55011	solute carrier family 12 member 2	Transporter	128	0.552	0.808	0.96153	0.05		1	5	0	2012	2019
Glioblastoma Multiforme	C1621958	SNAI2	6591	O43623	snail family transcriptional repressor 2		189	0.505	0.692	0.79531	0.05		1	5	0	2005	2019
Glioblastoma Multiforme	C1621958	SP1	6667	P08047	Sp1 transcription factor	Nucleic acid binding	209	0.493	0.769	0.99997	0.05		0.8	5	0	1998	2018
Glioblastoma Multiforme	C1621958	SREBF1	6720	P36956	sterol regulatory element binding transcription factor 1		159	0.518	0.808	0.014708	0.05		1	5	0	2011	2018
Glioblastoma Multiforme	C1621958	STAT6	6778	P42226	signal transducer and activator of transcription 6	Nucleic acid binding	281	0.475	0.808	0.98849	0.05		1	5	0	2005	2019
Glioblastoma Multiforme	C1621958	TAC1	6863	P20366	tachykinin precursor 1		478	0.424	0.923	0.74608	0.05		1	5	0	2017	2018
Glioblastoma Multiforme	C1621958	TOP1	7150	P11387	DNA topoisomerase I	Enzyme	143	0.542	0.692	1	0.05		1	5	0	2004	2019
Glioblastoma Multiforme	C1621958	TOP2A	7153	P11388	DNA topoisomerase II alpha		200	0.497	0.731	0.99086	0.05		1	5	0	2012	2019
Glioblastoma Multiforme	C1621958	MAGED4	728239	Q96JG8	MAGE family member D4		64	0.61	0.423	0.32367	0.05		1	5	0	2001	2012
Glioblastoma Multiforme	C1621958	TWIST1	7291	Q15672	twist family bHLH transcription factor 1	Transcription factor	559	0.397	0.846	0.34491	0.05		0.8	5	0	2013	2019
Glioblastoma Multiforme	C1621958	VCAM1	7412	P19320	vascular cell adhesion molecule 1		406	0.422	0.808	0.79791	0.05		1	5	0	2013	2019
Glioblastoma Multiforme	C1621958	SLC52A2	79581	Q9HAB3	solute carrier family 52 member 2	Transporter	261	0.483	0.808	0.0024777	0.05		1	5	0	2010	2018
Glioblastoma Multiforme	C1621958	LIN28A	79727	Q9H9Z2	lin-28 homolog A	Nucleic acid binding	161	0.523	0.731	0.019369	0.05		1	5	0	2013	2017
Glioblastoma Multiforme	C1621958	FOSL1	8061	P15407	FOS like 1, AP-1 transcription factor subunit	Transcription factor	150	0.519	0.846	0.15849	0.05		1	5	0	2001	2018
Glioblastoma Multiforme	C1621958	CALR	811	P27797	calreticulin	Calcium-binding protein	487	0.413	0.923	0.89133	0.05		1	5	0	2006	2018
Glioblastoma Multiforme	C1621958	SLC7A5	8140	Q01650	solute carrier family 7 member 5	Transporter	173	0.513	0.808	0.23505	0.05		1	5	0	2013	2019
Glioblastoma Multiforme	C1621958	CAPG	822	P40121	capping actin protein, gelsolin like	Cellular structure	111	0.548	0.731	9.357e-14	0.05		1	5	0	1994	2019
Glioblastoma Multiforme	C1621958	HAVCR2	84868	Q8TDQ0	hepatitis A virus cellular receptor 2		299	0.45	0.808	0.03866	0.05		1	5	0	2017	2019
Glioblastoma Multiforme	C1621958	CCNB1	891	P14635	cyclin B1	Enzyme modulator	155	0.512	0.731	0.15993	0.05		1	5	0	2007	2018
Glioblastoma Multiforme	C1621958	WNT3A	89780	P56704	Wnt family member 3A	Signaling	141	0.532	0.769	0.96491	0.05		1	5	0	2013	2019
Glioblastoma Multiforme	C1621958	SLC16A4	9122	O15374	solute carrier family 16 member 4	Transporter	114	0.55	0.731	9.6707e-08	0.05		1	5	0	2014	2018
Glioblastoma Multiforme	C1621958	SLC16A3	9123	O15427	solute carrier family 16 member 3	Transporter	122	0.542	0.731	0.00029385	0.05		1	5	0	2014	2018
Glioblastoma Multiforme	C1621958	ATG5	9474	Q9H1Y0	autophagy related 5	Transporter	282	0.462	0.885	0.97758	0.05		1	5	0	2016	2020
Glioblastoma Multiforme	C1621958	BAG3	9531	O95817	BAG cochaperone 3		223	0.498	0.846	0.61738	0.05		1	5	0	2011	2017
Glioblastoma Multiforme	C1621958	CD68	968	P34810	CD68 molecule	Transporter	452	0.408	0.808	1.4063e-06	0.05		1	5	0	2012	2018
Glioblastoma Multiforme	C1621958	ADGRE5	976	P48960	adhesion G protein-coupled receptor E5	G-protein coupled receptor	74	0.601	0.538	3.0761e-06	0.05		0.8	5	0	2012	2015
Glioblastoma Multiforme	C1621958	LRIG2	9860	O94898	leucine rich repeats and immunoglobulin like domains 2	Receptor	46	0.666	0.423	7.9705e-18	0.05		1	5	0	2009	2019
Glioblastoma Multiforme	C1621958	CDC20	991	Q12834	cell division cycle 20	Enzyme modulator	86	0.587	0.577	3.0001e-07	0.05		1	5	0	2008	2018
Glioblastoma Multiforme	C1621958	BCL2L11	10018	O43521	BCL2 like 11		173	0.51	0.731	0.88857	0.04		1	4	0	2012	2017
Glioblastoma Multiforme	C1621958	EBI3	10148	Q14213	Epstein-Barr virus induced 3	Signaling	233	0.474	0.808	0.10797	0.04		1	4	0	1994	2019
Glioblastoma Multiforme	C1621958	MERTK	10461	Q12866	MER proto-oncogene, tyrosine kinase	Kinase	154	0.531	0.692	2.6593e-11	0.04		1	4	0	2012	2018
Glioblastoma Multiforme	C1621958	CEACAM5	1048	P06731	CEA cell adhesion molecule 5		428	0.42	0.846	4.1625e-10	0.04		1	4	0	2003	2018
Glioblastoma Multiforme	C1621958	ADARB2	105	Q9NS39	adenosine deaminase RNA specific B2 (inactive)	Enzyme	33	0.716	0.308	0.85603	0.04		1	4	0	2007	2019
Glioblastoma Multiforme	C1621958	MRPL28	10573	Q13084	mitochondrial ribosomal protein L28		178	0.505	0.731	1.9955e-07	0.04		0.75	4	0	1994	2001
Glioblastoma Multiforme	C1621958	PDPN	10630	Q86YL7	podoplanin		256	0.47	0.769	0.00032048	0.04		0.75	4	2	2006	2019
Glioblastoma Multiforme	C1621958	SPINT2	10653	O43291	serine peptidase inhibitor, Kunitz type 2		112	0.556	0.808	0.00075147	0.04		1	4	0	2001	2019
Glioblastoma Multiforme	C1621958	SUB1	10923	P53999	SUB1 regulator of transcription		260	0.465	0.846	0.89245	0.04		0.75	4	0	1994	2001
Glioblastoma Multiforme	C1621958	CHEK1	1111	O14757	checkpoint kinase 1	Kinase	195	0.492	0.808	3.14e-08	0.04		1	4	0	2012	2019
Glioblastoma Multiforme	C1621958	WIF1	11197	Q9Y5W5	WNT inhibitory factor 1	Calcium-binding protein	171	0.507	0.731	1.3249e-09	0.04		1	4	0	2011	2016
Glioblastoma Multiforme	C1621958	H3P9	115482684		H3 histone pseudogene 9		177	0.505	0.731		0.04		0.75	4	0	1994	2001
Glioblastoma Multiforme	C1621958	SERPINA3	12	P01011	serpin family A member 3	Enzyme modulator	229	0.486	0.846	8.833e-14	0.04		1	4	0	2015	2018
Glioblastoma Multiforme	C1621958	KCNH8	131096	Q96L42	potassium voltage-gated channel subfamily H member 8	Ion channel	62	0.603	0.654	2.286e-10	0.04		1	4	0	2007	2012
Glioblastoma Multiforme	C1621958	SLCO6A1	133482	Q86UG4	solute carrier organic anion transporter family member 6A1	Transporter	449	0.412	0.885	2.8807e-11	0.04		0.75	4	0	1997	2013
Glioblastoma Multiforme	C1621958	CD109	135228	Q6YHK3	CD109 molecule		81	0.595	0.654	2.2707e-44	0.04		1	4	0	2014	2019
Glioblastoma Multiforme	C1621958	CRYAB	1410	P02511	crystallin alpha B		200	0.515	0.731	0.02247	0.04		1	4	0	2010	2019
Glioblastoma Multiforme	C1621958	PDIK1L	149420	Q8N165	PDLIM1 interacting kinase 1 like	Kinase	138	0.534	0.769	0.26436	0.04		1	4	0	2012	2020
Glioblastoma Multiforme	C1621958	CBLL2	158506	Q8N7E2	Cbl proto-oncogene like 2	Enzyme	235	0.476	0.808		0.04		1	4	0	2016	2019
Glioblastoma Multiforme	C1621958	DCX	1641	O43602	doublecortin		175	0.511	0.769	0.3042	0.04		1	4	0	2005	2017
Glioblastoma Multiforme	C1621958	DUSP1	1843	P28562	dual specificity phosphatase 1		214	0.491	0.808	0.010151	0.04		1	4	0	2008	2019
Glioblastoma Multiforme	C1621958	AIF1	199	P55008	allograft inflammatory factor 1	Calcium-binding protein	166	0.521	0.808	1.8793e-06	0.04		1	4	0	2000	2018
Glioblastoma Multiforme	C1621958	ELK1	2002	P19419	ETS transcription factor ELK1	Transcription factor	114	0.537	0.692	0.93711	0.04		1	4	0	2007	2012
Glioblastoma Multiforme	C1621958	EMP1	2012	P54849	epithelial membrane protein 1	Cellular structure	114	0.56	0.769	0.49706	0.04		1	4	0	2005	2019
Glioblastoma Multiforme	C1621958	EMP2	2013	P54851	epithelial membrane protein 2	Cellular structure	46	0.65	0.692	2.3873e-07	0.04		1	4	0	2017	2019
Glioblastoma Multiforme	C1621958	ERCC1	2067	P07992	ERCC excision repair 1, endonuclease non-catalytic subunit	Enzyme	345	0.445	0.846	1.5933e-07	0.04		1	4	1	2005	2014
Glioblastoma Multiforme	C1621958	FCGR2B	2213	P31994	Fc fragment of IgG receptor IIb	Cell adhesion	155	0.522	0.846	0.45637	0.04		1	4	0	2016	2019
Glioblastoma Multiforme	C1621958	NT5C2	22978	P49902	5'-nucleotidase, cytosolic II	Enzyme	149	0.537	0.846	2.1385e-06	0.04		1	4	0	2007	2019
Glioblastoma Multiforme	C1621958	SIRT3	23410	Q9NTG7	sirtuin 3	Epigenetic regulator	227	0.488	0.731	0.00016261	0.04		1	4	0	2018	2019
Glioblastoma Multiforme	C1621958	KCNH4	23415	Q9UQ05	potassium voltage-gated channel subfamily H member 4	Ion channel	61	0.603	0.615	0.99984	0.04		1	4	0	2007	2012
Glioblastoma Multiforme	C1621958	SLC7A11	23657	Q9UPY5	solute carrier family 7 member 11	Transporter	72	0.603	0.692	5.6817e-05	0.04		1	4	0	2015	2020
Glioblastoma Multiforme	C1621958	ALOX5	240	P09917	arachidonate 5-lipoxygenase	Enzyme	342	0.447	0.885	1.2059e-06	0.04		1	4	1	2006	2019
Glioblastoma Multiforme	C1621958	GAPDH	2597	P04406	glyceraldehyde-3-phosphate dehydrogenase	Enzyme	305	0.447	0.808	0.11388	0.04		1	4	0	2004	2019
Glioblastoma Multiforme	C1621958	LAT	27040	O43561	linker for activation of T cells		124	0.548	0.731	0.0092377	0.04		1	4	0	2013	2019
Glioblastoma Multiforme	C1621958	GLB1	2720	P16278	galactosidase beta 1	Enzyme	385	0.448	0.808	7.9215e-10	0.04		1	4	0	1998	2019
Glioblastoma Multiforme	C1621958	GLI2	2736	P10070	GLI family zinc finger 2		351	0.446	0.846	0.97303	0.04		1	4	0	2013	2018
Glioblastoma Multiforme	C1621958	GLUL	2752	P15104	glutamate-ammonia ligase	Enzyme	200	0.513	0.731	0.9957	0.04		1	4	0	2013	2019
Glioblastoma Multiforme	C1621958	ANG	283	P03950	angiogenin		185	0.511	0.769	0.28738	0.04		1	4	0	2010	2019
Glioblastoma Multiforme	C1621958	CAVIN1	284119	Q6NZI2	caveolae associated protein 1	Transcription factor	151	0.559	0.654	0.0049657	0.04		1	4	0	2014	2019
Glioblastoma Multiforme	C1621958	GRIA1	2890	P42261	glutamate ionotropic receptor AMPA type subunit 1	Ion channel	126	0.57	0.577	0.99869	0.04		1	4	0	2002	2019
Glioblastoma Multiforme	C1621958	NXT1	29107	Q9UKK6	nuclear transport factor 2 like export factor 1		178	0.505	0.731	0.64574	0.04		0.75	4	0	1994	2001
Glioblastoma Multiforme	C1621958	GSTP1	2950	P09211	glutathione S-transferase pi 1		610	0.383	0.923	0.014155	0.04		1	4	2	2010	2018
Glioblastoma Multiforme	C1621958	ANXA5	308	P08758	annexin A5		283	0.458	0.769	3.7978e-15	0.04		1	4	0	2014	2019
Glioblastoma Multiforme	C1621958	HLA-G	3135	P17693	major histocompatibility complex, class I, G		279	0.461	0.769	1.365e-11	0.04		1	4	0	2002	2017
Glioblastoma Multiforme	C1621958	HMMR	3161	O75330	hyaluronan mediated motility receptor		117	0.544	0.615	5.5222e-21	0.04		1	4	0	2014	2018
Glioblastoma Multiforme	C1621958	HOXA9	3205	P31269	homeobox A9		147	0.521	0.692	4.3591e-05	0.04		1	4	1	2010	2015
Glioblastoma Multiforme	C1621958	BIRC3	330	Q13489	baculoviral IAP repeat containing 3	Enzyme modulator	209	0.491	0.769	0.065597	0.04		1	4	0	2002	2017
Glioblastoma Multiforme	C1621958	MACC1	346389	Q6ZN28	MET transcriptional regulator MACC1		102	0.561	0.538	6.0053e-19	0.04		1	4	0	2013	2019
Glioblastoma Multiforme	C1621958	APP	351	P05067	amyloid beta precursor protein	Enzyme modulator	485	0.422	0.846	0.046544	0.04		1	4	0	1989	2012
Glioblastoma Multiforme	C1621958	IL2RA	3559	P01589	interleukin 2 receptor subunit alpha	Receptor	540	0.389	0.885	0.054709	0.04		1	4	0	1995	2019
Glioblastoma Multiforme	C1621958	CXCR1	3577	P25024	C-X-C motif chemokine receptor 1	G-protein coupled receptor	167	0.508	0.769	3.0337e-07	0.04		1	4	0	1997	2018
Glioblastoma Multiforme	C1621958	IL17A	3605	Q16552	interleukin 17A		1074	0.324	0.923	0.043049	0.04		1	4	0	1999	2018
Glioblastoma Multiforme	C1621958	CXCL10	3627	P02778	C-X-C motif chemokine ligand 10	Signaling	631	0.378	0.885	0.36865	0.04		1	4	0	1997	2018
Glioblastoma Multiforme	C1621958	GSTK1	373156	Q9Y2Q3	glutathione S-transferase kappa 1		445	0.412	0.885	1.9374e-06	0.04		0.75	4	0	1997	2013
Glioblastoma Multiforme	C1621958	KPNA2	3838	P52292	karyopherin subunit alpha 2	Transporter	79	0.588	0.654	0.54133	0.04		1	4	0	2012	2018
Glioblastoma Multiforme	C1621958	LEP	3952	P41159	leptin		931	0.349	0.846	0.46491	0.04		1	4	0	2000	2017
Glioblastoma Multiforme	C1621958	LIMK1	3984	P53667	LIM domain kinase 1	Kinase	271	0.488	0.731	0.99937	0.04		1	4	0	2009	2020
Glioblastoma Multiforme	C1621958	LOX	4015	P28300	lysyl oxidase		328	0.447	0.846	0.98769	0.04		1	4	0	2010	2019
Glioblastoma Multiforme	C1621958	MIR100	406892		microRNA 100		146	0.521	0.846		0.04		1	4	0	2013	2019
Glioblastoma Multiforme	C1621958	MIR143	406935		microRNA 143		267	0.462	0.885		0.04		1	4	0	2013	2018
Glioblastoma Multiforme	C1621958	MIR144	406936		microRNA 144		175	0.5	0.769		0.04		1	4	0	2015	2019
Glioblastoma Multiforme	C1621958	MIR149	406941		microRNA 149		140	0.524	0.769		0.04		0.75	4	0	2011	2016
Glioblastoma Multiforme	C1621958	MIR181C	406957		microRNA 181c		103	0.555	0.769		0.04		1	4	0	2005	2016
Glioblastoma Multiforme	C1621958	MIR219A1	407002		microRNA 219a-1		75	0.595	0.615		0.04		1	4	0	2010	2015
Glioblastoma Multiforme	C1621958	MIR296	407022		microRNA 296		95	0.564	0.654		0.04		1	4	0	2013	2018
Glioblastoma Multiforme	C1621958	MIR29B2	407025		microRNA 29b-2		214	0.484	0.885		0.04		1	4	0	2010	2017
Glioblastoma Multiforme	C1621958	MIR17HG	407975	Q75NE6	miR-17-92a-1 cluster host gene		224	0.483	0.808		0.04		1	4	0	2010	2017
Glioblastoma Multiforme	C1621958	MARCKS	4082	P29966	myristoylated alanine rich protein kinase C substrate		102	0.559	0.769	0.32648	0.04		1	4	0	2012	2019
Glioblastoma Multiforme	C1621958	MDK	4192	P21741	midkine	Signaling	209	0.494	0.808	0.23005	0.04		1	4	0	2005	2019
Glioblastoma Multiforme	C1621958	MMP3	4314	P08254	matrix metallopeptidase 3	Enzyme	473	0.408	0.885	5.7362e-15	0.04		0.75	4	0	1999	2019
Glioblastoma Multiforme	C1621958	NCAM1	4684	P13591	neural cell adhesion molecule 1		445	0.415	0.885	0.99999	0.04		1	4	0	1997	2016
Glioblastoma Multiforme	C1621958	NEFL	4747	P07196	neurofilament light		247	0.488	0.769		0.04		1	4	0	2012	2019
Glioblastoma Multiforme	C1621958	NFKBIA	4792	P25963	NFKB inhibitor alpha		226	0.487	0.885	0.99452	0.04		1	4	1	2011	2019
Glioblastoma Multiforme	C1621958	NOS2	4843	P35228	nitric oxide synthase 2		783	0.364	0.923	4.0277e-15	0.04		1	4	0	2018	2019
Glioblastoma Multiforme	C1621958	NPM1	4869	P06748	nucleophosmin 1	Chaperone	283	0.464	0.846	0.99816	0.04		1	4	0	2006	2017
Glioblastoma Multiforme	C1621958	NTS	4922	P30990	neurotensin		184	0.517	0.769	3.8527e-05	0.04		1	4	0	2014	2018
Glioblastoma Multiforme	C1621958	NUP98	4928	P52948	nucleoporin 98 and 96 precursor	Enzyme	129	0.532	0.577	1	0.04		1	4	0	2013	2018
Glioblastoma Multiforme	C1621958	NOX4	50507	Q9NPH5	NADPH oxidase 4	Enzyme	260	0.471	0.885	5.7555e-20	0.04		1	4	0	2008	2015
Glioblastoma Multiforme	C1621958	FOXP3	50943	Q9BZS1	forkhead box P3		688	0.368	0.846	0.99424	0.04		1	4	0	2012	2018
Glioblastoma Multiforme	C1621958	LEF1	51176	Q9UJU2	lymphoid enhancer binding factor 1		211	0.486	0.769	0.99789	0.04		1	4	0	2014	2018
Glioblastoma Multiforme	C1621958	TRPV2	51393	Q9Y5S1	transient receptor potential cation channel subfamily V member 2	Ion channel	90	0.581	0.615	7.9184e-13	0.04		1	4	0	2015	2020
Glioblastoma Multiforme	C1621958	PDGFB	5155	P01127	platelet derived growth factor subunit B	Signaling	301	0.488	0.846	0.77006	0.04		0.75	4	0	1989	2009
Glioblastoma Multiforme	C1621958	GDE1	51573	Q9NZC3	glycerophosphodiester phosphodiesterase 1		228	0.481	0.808	6.1163e-06	0.04		1	4	0	2016	2017
Glioblastoma Multiforme	C1621958	PDK1	5163	Q15118	pyruvate dehydrogenase kinase 1	Kinase	164	0.51	0.808	1.0963e-05	0.04		1	4	0	2015	2018
Glioblastoma Multiforme	C1621958	WWOX	51741	Q9NZC7	WW domain containing oxidoreductase	Enzyme	356	0.453	0.808	1.2376e-15	0.04		1	4	0	2011	2015
Glioblastoma Multiforme	C1621958	PFKFB3	5209	Q16875	6-phosphofructo-2-kinase/fructose-2,6-biphosphatase 3	Kinase	104	0.561	0.808	0.24579	0.04		1	4	0	2009	2019
Glioblastoma Multiforme	C1621958	PGR	5241	P06401	progesterone receptor	Nuclear receptor	392	0.426	0.885	0.051042	0.04		1	4	0	2016	2019
Glioblastoma Multiforme	C1621958	PIN1	5300	Q13526	peptidylprolyl cis/trans isomerase, NIMA-interacting 1		212	0.488	0.769	0.74031	0.04		1	4	0	2007	2018
Glioblastoma Multiforme	C1621958	PLAUR	5329	Q03405	plasminogen activator, urokinase receptor		147	0.536	0.731	0.0053378	0.04		1	4	0	1999	2018
Glioblastoma Multiforme	C1621958	DLL4	54567	Q9NR61	delta like canonical Notch ligand 4		219	0.494	0.769	0.99982	0.04		1	4	0	2007	2017
Glioblastoma Multiforme	C1621958	RMDN3	55177	Q96TC7	regulator of microtubule dynamics 3		134	0.534	0.769	5.1687e-05	0.04		1	4	0	2008	2018
Glioblastoma Multiforme	C1621958	PTPA	5524	Q15257	protein phosphatase 2 phosphatase activator	Enzyme modulator	245	0.48	0.846	0.99057	0.04		1	4	0	2015	2018
Glioblastoma Multiforme	C1621958	TNFRSF19	55504	Q9NS68	TNF receptor superfamily member 19		30	0.7	0.423	0.032926	0.04		1	4	0	2010	2018
Glioblastoma Multiforme	C1621958	PRKCI	5584	P41743	protein kinase C iota	Kinase	78	0.584	0.5	0.067986	0.04		1	4	0	2011	2016
Glioblastoma Multiforme	C1621958	PRKDC	5591	P78527	protein kinase, DNA-activated, catalytic subunit	Kinase	131	0.54	0.808	1	0.04		1	4	1	2009	2018
Glioblastoma Multiforme	C1621958	SPHK2	56848	Q9NRA0	sphingosine kinase 2	Kinase	140	0.546	0.731	1.28e-07	0.04		1	4	0	2005	2019
Glioblastoma Multiforme	C1621958	MIR485	574436		microRNA 485		70	0.593	0.731		0.04		1	4	0	2017	2019
Glioblastoma Multiforme	C1621958	ADGRB1	575	O14514	adhesion G protein-coupled receptor B1	G-protein coupled receptor	34	0.695	0.231	1	0.04		1	4	0	1997	2006
Glioblastoma Multiforme	C1621958	PTPRD	5789	P23468	protein tyrosine phosphatase receptor type D	Enzyme	93	0.584	0.731	1	0.04		1	4	0	2008	2019
Glioblastoma Multiforme	C1621958	BCAT1	586	P54687	branched chain amino acid transaminase 1	Enzyme	62	0.606	0.538	3.7984e-08	0.04		1	4	0	2013	2017
Glioblastoma Multiforme	C1621958	RBL2	5934	Q08999	RB transcriptional corepressor like 2	Nucleic acid binding	89	0.579	0.769	0.99835	0.04		0.75	4	0	1999	2003
Glioblastoma Multiforme	C1621958	RNASE3	6037	P12724	ribonuclease A family member 3		207	0.49	0.808		0.04		1	4	0	1989	2011
Glioblastoma Multiforme	C1621958	GAS5	60674		growth arrest specific 5		184	0.497	0.808		0.04		1	4	0	2018	2019
Glioblastoma Multiforme	C1621958	S100B	6285	P04271	S100 calcium binding protein B	Calcium-binding protein	599	0.383	0.923	0.04387	0.04		1	4	1	1989	2011
Glioblastoma Multiforme	C1621958	MNX1-AS1	645249		MNX1 antisense RNA 1 (head to head)		53	0.615	0.346		0.04		1	4	0	2019	2019
Glioblastoma Multiforme	C1621958	SH3GL2	6456	Q99962	SH3 domain containing GRB2 like 2, endophilin A1		37	0.659	0.5	0.00011862	0.04		1	4	0	2012	2017
Glioblastoma Multiforme	C1621958	SKP2	6502	Q13309	S-phase kinase associated protein 2		204	0.492	0.808	0.96042	0.04		1	4	0	2005	2019
Glioblastoma Multiforme	C1621958	SLC22A3	6581	O75751	solute carrier family 22 member 3	Transporter	154	0.531	0.846	7.7723e-10	0.04		1	4	0	2012	2018
Glioblastoma Multiforme	C1621958	SOD2	6648	P04179	superoxide dismutase 2	Enzyme	668	0.379	0.923	0.15499	0.04		1	4	0	2016	2019
Glioblastoma Multiforme	C1621958	BSG	682	P35613	basigin (Ok blood group)		287	0.458	0.769	2.5873e-05	0.04		1	4	0	2013	2017
Glioblastoma Multiforme	C1621958	KLF9	687	Q13886	Kruppel like factor 9	Nucleic acid binding	77	0.595	0.577	0.88783	0.04		1	4	0	2011	2018
Glioblastoma Multiforme	C1621958	BTK	695	Q06187	Bruton tyrosine kinase	Kinase	290	0.464	0.808	0.99996	0.04		1	4	0	2014	2019
Glioblastoma Multiforme	C1621958	BUB1	699	O43683	BUB1 mitotic checkpoint serine/threonine kinase	Kinase	162	0.528	0.731	4.8813e-09	0.04		1	4	0	2001	2019
Glioblastoma Multiforme	C1621958	BUB1B	701	O60566	BUB1 mitotic checkpoint serine/threonine kinase B	Kinase	231	0.502	0.808	6.998e-10	0.04		1	4	0	2013	2017
Glioblastoma Multiforme	C1621958	TM7SF2	7108	O76062	transmembrane 7 superfamily member 2	Enzyme	217	0.486	0.808	1.366e-07	0.04		1	4	0	1998	2019
Glioblastoma Multiforme	C1621958	TNFRSF1A	7132	P19438	TNF receptor superfamily member 1A		487	0.409	0.923	0.9949	0.04		1	4	0	1995	2018
Glioblastoma Multiforme	C1621958	VEGFC	7424	P49767	vascular endothelial growth factor C	Signaling	291	0.459	0.769	0.49565	0.04		1	4	0	2015	2018
Glioblastoma Multiforme	C1621958	VTN	7448	P04004	vitronectin		178	0.509	0.769	1.5014e-10	0.04		1	4	0	2003	2016
Glioblastoma Multiforme	C1621958	DDR1	780	Q08345	discoidin domain receptor tyrosine kinase 1	Kinase	195	0.497	0.808	4.6331e-06	0.04		1	4	2	2000	2020
Glioblastoma Multiforme	C1621958	TRPM8	79054	Q7Z2W7	transient receptor potential cation channel subfamily M member 8	Ion channel	127	0.553	0.808	4.5964e-29	0.04		1	4	0	2008	2019
Glioblastoma Multiforme	C1621958	MUL1	79594	Q969V5	mitochondrial E3 ubiquitin protein ligase 1		241	0.473	0.808	1.9108e-06	0.04		1	4	0	2016	2019
Glioblastoma Multiforme	C1621958	CALCR	799	P30988	calcitonin receptor	G-protein coupled receptor	282	0.464	0.846	3.1176e-09	0.04		1	4	0	2017	2019
Glioblastoma Multiforme	C1621958	TUSC3	7991	Q13454	tumor suppressor candidate 3	Transporter	104	0.576	0.615	3.4606e-06	0.04		1	4	0	1998	2017
Glioblastoma Multiforme	C1621958	TET1	80312	Q8NFU7	tet methylcytosine dioxygenase 1		156	0.523	0.808	1	0.04		1	4	0	2014	2019
Glioblastoma Multiforme	C1621958	MAGED4B	81557	Q96JG8	MAGE family member D4B		62	0.612	0.423		0.04		1	4	0	2001	2012
Glioblastoma Multiforme	C1621958	USP9X	8239	Q93008	ubiquitin specific peptidase 9 X-linked		255	0.502	0.846	1	0.04		1	4	0	2015	2019
Glioblastoma Multiforme	C1621958	BEX2	84707	Q9BXY8	brain expressed X-linked 2		26	0.705	0.231	0.10078	0.04		1	4	0	2011	2019
Glioblastoma Multiforme	C1621958	LGR5	8549	O75473	leucine rich repeat containing G protein-coupled receptor 5	G-protein coupled receptor	131	0.542	0.654	2.5019e-08	0.04		1	4	0	2013	2019
Glioblastoma Multiforme	C1621958	SOCS1	8651	O15524	suppressor of cytokine signaling 1	Enzyme modulator	315	0.445	0.808	0.58544	0.04		1	4	0	2007	2019
Glioblastoma Multiforme	C1621958	IL18R1	8809	Q13478	interleukin 18 receptor 1	Receptor	234	0.473	0.808	8.625e-06	0.04		1	4	0	1994	2019
Glioblastoma Multiforme	C1621958	LGI1	9211	O95970	leucine rich glioma inactivated 1		118	0.568	0.731	0.99914	0.04		1	4	0	1998	2006
Glioblastoma Multiforme	C1621958	IKBKE	9641	Q14164	inhibitor of nuclear factor kappa B kinase subunit epsilon	Kinase	79	0.597	0.731	0.0090053	0.04		1	4	0	2017	2019
Glioblastoma Multiforme	C1621958	HDAC4	9759	P56524	histone deacetylase 4	Epigenetic regulator	256	0.484	0.885	1	0.04		1	4	0	2009	2017
Glioblastoma Multiforme	C1621958	CD151	977	P48509	CD151 molecule (Raph blood group)		101	0.564	0.654	1.0841e-05	0.04		1	4	0	2005	2016
Glioblastoma Multiforme	C1621958	USP15	9958	Q9Y4E8	ubiquitin specific peptidase 15	Enzyme	28	0.711	0.423	0.99997	0.04		1	4	0	2012	2018
Glioblastoma Multiforme	C1621958	A1BG	1	P04217	alpha-1-B glycoprotein	Receptor	27	0.7	0.538	4.9917e-09	0.03		0.667	3	0	2014	2019
Glioblastoma Multiforme	C1621958	TNRC6C-AS1	100131096		TNRC6C antisense RNA 1		27	0.705	0.346		0.03		1	3	0	2017	2018
Glioblastoma Multiforme	C1621958	ABCB6	10058	Q9NP58	ATP binding cassette subfamily B member 6 (Langereis blood group)	Transporter	400	0.431	0.885	8.5999e-19	0.03		1	3	0	2015	2019
Glioblastoma Multiforme	C1621958	CDH11	1009	P55287	cadherin 11		203	0.512	0.808	0.9999	0.03		1	3	0	2012	2019
Glioblastoma Multiforme	C1621958	NAMPT	10135	P43490	nicotinamide phosphoribosyltransferase	Signaling	199	0.502	0.808	0.97914	0.03		1	3	0	2016	2017
Glioblastoma Multiforme	C1621958	TRIM28	10155	Q13263	tripartite motif containing 28		82	0.592	0.731	1	0.03		0.667	3	0	2016	2019
Glioblastoma Multiforme	C1621958	ADAM10	102	O14672	ADAM metallopeptidase domain 10		224	0.489	0.846	1	0.03		1	3	0	2009	2017
Glioblastoma Multiforme	C1621958	CDKN2C	1031	P42773	cyclin dependent kinase inhibitor 2C		149	0.527	0.654	0.39526	0.03		1	3	0	2008	2012
Glioblastoma Multiforme	C1621958	TRIM3	10612	O75382	tripartite motif containing 3	Enzyme	31	0.682	0.423	0.9893	0.03		0.667	3	0	2014	2017
Glioblastoma Multiforme	C1621958	KHDRBS1	10657	Q07666	KH RNA binding domain containing, signal transduction associated 1	Nucleic acid binding	289	0.457	0.846	0.99423	0.03		1	3	0	2011	2019
Glioblastoma Multiforme	C1621958	FGL2	10875	Q14314	fibrinogen like 2	Signaling	63	0.621	0.615	6.1472e-05	0.03		1	3	0	2015	2019
Glioblastoma Multiforme	C1621958	MNS16A	110806265		MNS16A minisatellite promoter		35	0.663	0.5		0.03		1	3	0	2006	2009
Glioblastoma Multiforme	C1621958	CHEK2	11200	O96017	checkpoint kinase 2	Kinase	297	0.46	0.808	1.2103e-24	0.03		1	3	1	2006	2018
Glioblastoma Multiforme	C1621958	PDCD10	11235	Q9BUL8	programmed cell death 10		68	0.631	0.692	0.96197	0.03		1	3	0	2015	2019
Glioblastoma Multiforme	C1621958	OIP5	11339	O43482	Opa interacting protein 5		33	0.682	0.385	1.4649e-07	0.03		1	3	0	2013	2018
Glioblastoma Multiforme	C1621958	MIR155HG	114614		MIR155 host gene		56	0.617	0.615		0.03		1	3	0	2017	2019
Glioblastoma Multiforme	C1621958	H3P40	115482723		H3 histone pseudogene 40		175	0.506	0.846		0.03		1	3	0	2016	2019
Glioblastoma Multiforme	C1621958	LRIG3	121227	Q6UXM1	leucine rich repeats and immunoglobulin like domains 3	Receptor	18	0.743	0.231	1.1655e-09	0.03		1	3	0	2009	2019
Glioblastoma Multiforme	C1621958	CNR1	1268	P21554	cannabinoid receptor 1	G-protein coupled receptor	393	0.446	0.808	0.50652	0.03		1	3	0	2017	2019
Glioblastoma Multiforme	C1621958	COL3A1	1281	P02461	collagen type III alpha 1 chain		301	0.477	0.808	1	0.03		1	3	0	2016	2018
Glioblastoma Multiforme	C1621958	CPOX	1371	P36551	coproporphyrinogen oxidase	Enzyme	246	0.488	0.846	0.17152	0.03		1	3	0	2014	2019
Glioblastoma Multiforme	C1621958	CRP	1401	P02741	C-reactive protein		1483	0.299	0.962	0.0036969	0.03		0.667	3	0	2018	2019
Glioblastoma Multiforme	C1621958	CSF1R	1436	P07333	colony stimulating factor 1 receptor	Kinase	356	0.448	0.808	0.13278	0.03		1	3	0	1994	2017
Glioblastoma Multiforme	C1621958	CSF3	1440	P09919	colony stimulating factor 3		687	0.377	0.885	0.38046	0.03		1	3	0	2012	2019
Glioblastoma Multiforme	C1621958	CYP27B1	1594	O15528	cytochrome P450 family 27 subfamily B member 1	Enzyme	229	0.502	0.769	1.9194e-07	0.03		1	3	0	2001	2006
Glioblastoma Multiforme	C1621958	DGKA	1606	P23743	diacylglycerol kinase alpha	Kinase	26	0.7	0.346	0.46072	0.03		1	3	0	2013	2018
Glioblastoma Multiforme	C1621958	DAXX	1616	Q9UER7	death domain associated protein		137	0.544	0.692	0.098633	0.03		1	3	0	2015	2018
Glioblastoma Multiforme	C1621958	DCT	1638	P40126	dopachrome tautomerase	Enzyme	59	0.619	0.654	7.3889e-14	0.03		1	3	0	2003	2007
Glioblastoma Multiforme	C1621958	DHCR24	1718	Q15392	24-dehydrocholesterol reductase	Enzyme	216	0.498	0.769	0.031029	0.03		1	3	0	2017	2019
Glioblastoma Multiforme	C1621958	NQO1	1728	P15559	NAD(P)H quinone dehydrogenase 1		368	0.434	0.885	1.1867e-09	0.03		1	3	0	2000	2018
Glioblastoma Multiforme	C1621958	DSC3	1825	Q14574	desmocollin 3	Cell adhesion	103	0.57	0.808	2.2848e-21	0.03		1	3	0	2016	2019
Glioblastoma Multiforme	C1621958	EIF4EBP1	1978	Q13541	eukaryotic translation initiation factor 4E binding protein 1	Nucleic acid binding	201	0.494	0.885	0.20762	0.03		1	3	0	2009	2018
Glioblastoma Multiforme	C1621958	MARK2	2011	Q7KZI7	microtubule affinity regulating kinase 2	Kinase	115	0.555	0.692	0.99999	0.03		1	3	0	2012	2016
Glioblastoma Multiforme	C1621958	EMP3	2014	P54852	epithelial membrane protein 3	Cellular structure	55	0.619	0.423	2.6151e-06	0.03		0.667	3	0	2012	2018
Glioblastoma Multiforme	C1621958	EMX2	2018	Q04743	empty spiracles homeobox 2	Transcription factor	59	0.623	0.577	0.9507	0.03		1	3	0	2016	2018
Glioblastoma Multiforme	C1621958	ENG	2022	P17813	endoglin		371	0.446	0.846	0.99858	0.03		1	3	0	2014	2018
Glioblastoma Multiforme	C1621958	ERBB4	2066	Q15303	erb-b2 receptor tyrosine kinase 4	Kinase	317	0.455	0.846	0.99912	0.03		0.667	3	0	2011	2018
Glioblastoma Multiforme	C1621958	ESRRB	2103	O95718	estrogen related receptor beta	Nuclear receptor	102	0.565	0.846	0.12609	0.03		1	3	0	2008	2019
Glioblastoma Multiforme	C1621958	ALDH1A1	216	P00352	aldehyde dehydrogenase 1 family member A1	Enzyme	270	0.46	0.846	0.95448	0.03		1	3	0	2012	2019
Glioblastoma Multiforme	C1621958	HOXA11-AS	221883		HOXA11 antisense RNA		60	0.61	0.423		0.03		1	3	0	2016	2019
Glioblastoma Multiforme	C1621958	FDPS	2224	P14324	farnesyl diphosphate synthase	Enzyme	83	0.599	0.769	0.0056199	0.03		1	3	0	2010	2018
Glioblastoma Multiforme	C1621958	FGFR4	2264	P22455	fibroblast growth factor receptor 4	Kinase	220	0.49	0.769	7.1917e-13	0.03		0.333	3	0	2002	2011
Glioblastoma Multiforme	C1621958	VEGFD	2277	O43915	vascular endothelial growth factor D	Signaling	132	0.538	0.769	2.498e-05	0.03		1	3	0	2001	2005
Glioblastoma Multiforme	C1621958	FKBP4	2288	Q02790	FKBP prolyl isomerase 4	Enzyme	149	0.532	0.769	0.15539	0.03		1	3	0	2017	2019
Glioblastoma Multiforme	C1621958	MYT1L	23040	Q9UL68	myelin transcription factor 1 like	Transcription factor	46	0.659	0.462	1	0.03		1	3	0	2013	2018
Glioblastoma Multiforme	C1621958	KDM6B	23135	O15054	lysine demethylase 6B	Epigenetic regulator	173	0.514	0.808	1	0.03		1	3	0	2012	2019
Glioblastoma Multiforme	C1621958	PHLDB1	23187	Q86UU1	pleckstrin homology like domain family B member 1		20	0.722	0.423	0.10667	0.03		1	3	2	2011	2015
Glioblastoma Multiforme	C1621958	DICER1	23405	Q9UPY3	dicer 1, ribonuclease III	Enzyme	302	0.446	0.846	1	0.03		1	3	0	2013	2016
Glioblastoma Multiforme	C1621958	CBX7	23492	O95931	chromobox 7	Epigenetic regulator	73	0.595	0.615	0.68534	0.03		1	3	0	2013	2017
Glioblastoma Multiforme	C1621958	CDK20	23552	Q8IZL9	cyclin dependent kinase 20	Kinase	34	0.682	0.462	5.9487e-14	0.03		1	3	0	2007	2015
Glioblastoma Multiforme	C1621958	CORO1C	23603	Q9ULV4	coronin 1C	Cellular structure	40	0.663	0.423	0.99813	0.03		0.667	3	0	2008	2019
Glioblastoma Multiforme	C1621958	ABL1	25	P00519	ABL proto-oncogene 1, non-receptor tyrosine kinase	Kinase	395	0.432	0.923	0.99998	0.03		0.667	3	0	1990	2016
Glioblastoma Multiforme	C1621958	FUS	2521	P35637	FUS RNA binding protein	Nucleic acid binding	301	0.47	0.846	0.9993	0.03		1	3	0	2015	2019
Glioblastoma Multiforme	C1621958	NOC2L	26155	Q9Y3T9	NOC2 like nucleolar associated transcriptional repressor		80	0.593	0.731	2.8933e-29	0.03		1	3	0	2017	2019
Glioblastoma Multiforme	C1621958	GAS1	2619	P54826	growth arrest specific 1		88	0.587	0.654	0.81915	0.03		1	3	0	2014	2018
Glioblastoma Multiforme	C1621958	GATA4	2626	P43694	GATA binding protein 4		336	0.458	0.846	0.49308	0.03		1	3	0	2011	2019
Glioblastoma Multiforme	C1621958	GATA6	2627	Q92908	GATA binding protein 6		259	0.478	0.808	0.99709	0.03		1	3	0	2009	2012
Glioblastoma Multiforme	C1621958	GBP1	2633	P32455	guanylate binding protein 1	Enzyme modulator	53	0.626	0.731	1.2564e-15	0.03		1	3	0	2011	2019
Glioblastoma Multiforme	C1621958	AMELX	265	Q99217	amelogenin X-linked		72	0.599	0.769	0.074507	0.03		1	3	0	2009	2019
Glioblastoma Multiforme	C1621958	GHRH	2691	P01286	growth hormone releasing hormone	Signaling	176	0.503	0.769	0.14964	0.03		1	3	0	2000	2014
Glioblastoma Multiforme	C1621958	SGSM3	27352	Q96HU1	small G protein signaling modulator 3	Enzyme	259	0.469	0.808	3.4061e-15	0.03		1	3	0	2011	2017
Glioblastoma Multiforme	C1621958	GNRHR	2798	P30968	gonadotropin releasing hormone receptor	G-protein coupled receptor	133	0.54	0.654	0.067566	0.03		1	3	0	2009	2017
Glioblastoma Multiforme	C1621958	CXCR3	2833	P49682	C-X-C motif chemokine receptor 3	G-protein coupled receptor	367	0.436	0.808	0.181	0.03		1	3	0	2011	2017
Glioblastoma Multiforme	C1621958	SLC9A9	285195	Q8IVB4	solute carrier family 9 member A9	Transporter	44	0.656	0.577	5.3311e-12	0.03		1	3	0	2017	2019
Glioblastoma Multiforme	C1621958	GRIA2	2891	P42262	glutamate ionotropic receptor AMPA type subunit 2	Ion channel	110	0.573	0.692	0.99916	0.03		1	3	0	2002	2020
Glioblastoma Multiforme	C1621958	GRN	2896	P28799	granulin precursor		412	0.435	0.846	0.069666	0.03		1	3	0	2001	2015
Glioblastoma Multiforme	C1621958	PYCARD	29108	Q9ULZ3	PYD and CARD domain containing	Enzyme	294	0.457	0.808	0.00019768	0.03		1	3	0	2004	2007
Glioblastoma Multiforme	C1621958	GRP	2922	P07492	gastrin releasing peptide		172	0.524	0.769	0.0025347	0.03		1	3	0	1999	2017
Glioblastoma Multiforme	C1621958	GRPR	2925	P30550	gastrin releasing peptide receptor	G-protein coupled receptor	85	0.595	0.538	0.22444	0.03		1	3	0	2017	2019
Glioblastoma Multiforme	C1621958	NOP53	29997	Q9NZM5	NOP53 ribosome biogenesis factor		69	0.597	0.577	0.18147	0.03		1	3	0	2010	2012
Glioblastoma Multiforme	C1621958	HK1	3098	P19367	hexokinase 1	Kinase	161	0.542	0.731	0.91459	0.03		1	3	0	2011	2015
Glioblastoma Multiforme	C1621958	ANXA7	310	P20073	annexin A7		55	0.631	0.615	8.5846e-10	0.03		1	3	0	2003	2013
Glioblastoma Multiforme	C1621958	HLA-C	3107	P10321	major histocompatibility complex, class I, C		435	0.415	0.846	1.5695e-06	0.03		1	3	0	2009	2018
Glioblastoma Multiforme	C1621958	APAF1	317	O14727	apoptotic peptidase activating factor 1		145	0.525	0.769	9.6242e-06	0.03		1	3	0	2003	2017
Glioblastoma Multiforme	C1621958	IKBKB	3551	O14920	inhibitor of nuclear factor kappa B kinase subunit beta	Kinase	191	0.506	0.846	0.99192	0.03		1	3	0	2012	2019
Glioblastoma Multiforme	C1621958	CXCR2	3579	P25025	C-X-C motif chemokine receptor 2	G-protein coupled receptor	335	0.445	0.923	0.013736	0.03		1	3	0	1997	2018
Glioblastoma Multiforme	C1621958	ING1	3621	Q9UK53	inhibitor of growth family member 1	Nucleic acid binding	99	0.573	0.692	0.0096662	0.03		1	3	0	2008	2018
Glioblastoma Multiforme	C1621958	INPPL1	3636	O15357	inositol polyphosphate phosphatase like 1		133	0.59	0.769	0.0023313	0.03		1	3	0	2000	2019
Glioblastoma Multiforme	C1621958	ITGA6	3655	P23229	integrin subunit alpha 6		137	0.539	0.769	1.9014e-07	0.03		1	3	0	2014	2017
Glioblastoma Multiforme	C1621958	IRS1	3667	P35568	insulin receptor substrate 1		233	0.488	0.769	0.023645	0.03		1	3	0	2015	2018
Glioblastoma Multiforme	C1621958	AR	367	P10275	androgen receptor	Nuclear receptor	854	0.351	0.846	0.98837	0.03		1	3	0	2015	2020
Glioblastoma Multiforme	C1621958	ITGAM	3684	P11215	integrin subunit alpha M		343	0.443	0.808	3.3148e-11	0.03		1	3	0	2016	2019
Glioblastoma Multiforme	C1621958	AREG	374	P15514	amphiregulin	Signaling	221	0.487	0.769	0.35407	0.03		1	3	0	1998	2019
Glioblastoma Multiforme	C1621958	KCNH2	3757	Q12809	potassium voltage-gated channel subfamily H member 2	Ion channel	189	0.522	0.731	0.99593	0.03		1	3	0	2005	2017
Glioblastoma Multiforme	C1621958	RND3	390	P61587	Rho family GTPase 3	Enzyme modulator	46	0.656	0.385	0.96682	0.03		1	3	0	2015	2019
Glioblastoma Multiforme	C1621958	LDLR	3949	P01130	low density lipoprotein receptor		336	0.449	0.885	9.841e-24	0.03		1	3	0	2011	2017
Glioblastoma Multiforme	C1621958	MIR106A	406899		microRNA 106a		140	0.524	0.846		0.03		1	3	0	2013	2016
Glioblastoma Multiforme	C1621958	MIR10A	406902		microRNA 10a		158	0.513	0.846		0.03		1	3	0	2010	2018
Glioblastoma Multiforme	C1621958	MIR125A	406910		microRNA 125a		225	0.48	0.769		0.03		1	3	0	2010	2015
Glioblastoma Multiforme	C1621958	MIR126	406913		microRNA 126		305	0.447	0.846		0.03		1	3	0	2016	2020
Glioblastoma Multiforme	C1621958	MIR142	406934		microRNA 142		220	0.48	0.846		0.03		1	3	0	2013	2018
Glioblastoma Multiforme	C1621958	MIR154	406946		microRNA 154		71	0.593	0.577		0.03		1	3	0	2016	2017
Glioblastoma Multiforme	C1621958	MIR18A	406953		microRNA 18a		154	0.52	0.846		0.03		1	3	0	2013	2017
Glioblastoma Multiforme	C1621958	MIR183	406959		microRNA 183		190	0.494	0.885		0.03		1	3	0	2016	2018
Glioblastoma Multiforme	C1621958	MIR186	406962		microRNA 186		105	0.551	0.808		0.03		1	3	0	2017	2019
Glioblastoma Multiforme	C1621958	MIR197	406974		microRNA 197		93	0.565	0.615		0.03		1	3	0	2015	2019
Glioblastoma Multiforme	C1621958	MIR205	406988		microRNA 205		210	0.482	0.846		0.03		1	3	0	2012	2018
Glioblastoma Multiforme	C1621958	MIR224	407009		microRNA 224		128	0.534	0.654		0.03		1	3	0	2014	2019
Glioblastoma Multiforme	C1621958	MIR27A	407018		microRNA 27a		248	0.466	0.846		0.03		1	3	0	2013	2017
Glioblastoma Multiforme	C1621958	MIR299	407023		microRNA 299		49	0.626	0.462		0.03		1	3	0	2017	2018
Glioblastoma Multiforme	C1621958	ARRB1	408	P49407	arrestin beta 1	Enzyme modulator	92	0.588	0.846	0.99394	0.03		1	3	0	2009	2017
Glioblastoma Multiforme	C1621958	MMP12	4321	P39900	matrix metallopeptidase 12	Enzyme	216	0.484	0.885		0.03		1	3	0	2006	2018
Glioblastoma Multiforme	C1621958	MIR135B	442891		microRNA 135b		111	0.554	0.731		0.03		1	3	0	2014	2015
Glioblastoma Multiforme	C1621958	MIR330	442902		microRNA 330		81	0.584	0.692		0.03		1	3	0	2012	2017
Glioblastoma Multiforme	C1621958	MIR331	442903		microRNA 331		63	0.612	0.615		0.03		1	3	0	2011	2019
Glioblastoma Multiforme	C1621958	MIR370	442915		microRNA 370		112	0.546	0.808		0.03		1	3	0	2016	2018
Glioblastoma Multiforme	C1621958	MIR196B	442920		microRNA 196b		100	0.561	0.731		0.03		1	3	0	2011	2019
Glioblastoma Multiforme	C1621958	ASS1	445	P00966	argininosuccinate synthase 1	Enzyme	163	0.523	0.731	1.5095e-09	0.03		1	3	0	2013	2018
Glioblastoma Multiforme	C1621958	MSN	4478	P26038	moesin	Cellular structure	140	0.534	0.769	0.99967	0.03		1	3	0	2013	2018
Glioblastoma Multiforme	C1621958	MST1	4485	P26927	macrophage stimulating 1	Enzyme	281	0.465	0.885	4.7831e-19	0.03		1	3	0	2014	2017
Glioblastoma Multiforme	C1621958	MTAP	4507	Q13126	methylthioadenosine phosphorylase	Enzyme	167	0.514	0.731	7.5973e-08	0.03		1	3	0	2016	2019
Glioblastoma Multiforme	C1621958	MTHFR	4524	P42898	methylenetetrahydrofolate reductase		985	0.337	0.885	3.2068e-10	0.03		1	3	2	2006	2008
Glioblastoma Multiforme	C1621958	MTTP	4547	P55157	microsomal triglyceride transfer protein	Transporter	209	0.505	0.846	1.04e-05	0.03		0.667	3	0	1990	2016
Glioblastoma Multiforme	C1621958	ATF4	468	P18848	activating transcription factor 4		178	0.507	0.769	0.015659	0.03		1	3	0	2018	2019
Glioblastoma Multiforme	C1621958	NEDD9	4739	Q14511	neural precursor cell expressed, developmentally down-regulated 9		113	0.548	0.769	0.12634	0.03		1	3	0	2012	2016
Glioblastoma Multiforme	C1621958	NFATC2	4773	Q13469	nuclear factor of activated T cells 2	Transcription factor	154	0.525	0.731	0.99995	0.03		1	3	0	2013	2019
Glioblastoma Multiforme	C1621958	NRAS	4893	P01111	NRAS proto-oncogene, GTPase	Enzyme modulator	611	0.39	0.808	0.49009	0.03		1	3	0	1996	2016
Glioblastoma Multiforme	C1621958	SLC22A18	5002	Q96BI1	solute carrier family 22 member 18	Transporter	76	0.595	0.692	6.458e-06	0.03		1	3	0	2013	2018
Glioblastoma Multiforme	C1621958	PAK1	5058	Q13153	p21 (RAC1) activated kinase 1	Kinase	221	0.494	0.808	0.0013306	0.03		1	3	0	2007	2019
Glioblastoma Multiforme	C1621958	ASCC1	51008	Q8N9N2	activating signal cointegrator 1 complex subunit 1		209	0.495	0.846	2.6051e-14	0.03		1	3	0	2016	2019
Glioblastoma Multiforme	C1621958	EXOSC3	51010	Q9NQT5	exosome component 3	Enzyme	84	0.61	0.692	0.00024296	0.03		1	3	0	2001	2017
Glioblastoma Multiforme	C1621958	GAL	51083	P22466	galanin and GMAP prepropeptide		226	0.493	0.846	4.3885e-06	0.03		1	3	0	2003	2017
Glioblastoma Multiforme	C1621958	ANGPTL4	51129	Q9BY76	angiopoietin like 4	Signaling	198	0.498	0.731	2.3089e-11	0.03		1	3	0	2011	2019
Glioblastoma Multiforme	C1621958	PHF20	51230	Q9BVI0	PHD finger protein 20		45	0.65	0.615	0.99875	0.03		1	3	0	2013	2017
Glioblastoma Multiforme	C1621958	RNF138	51444	Q8WVD3	ring finger protein 138		15	0.76	0.192	0.67535	0.03		1	3	0	2012	2018
Glioblastoma Multiforme	C1621958	MPC1	51660	Q9Y5U8	mitochondrial pyruvate carrier 1	Transporter	56	0.653	0.577	0.038495	0.03		1	3	0	2018	2019
Glioblastoma Multiforme	C1621958	ENPP1	5167	P22413	ectonucleotide pyrophosphatase/phosphodiesterase 1	Enzyme	247	0.498	0.808	4.9944e-08	0.03		1	3	0	2011	2019
Glioblastoma Multiforme	C1621958	PGF	5228	P49763	placental growth factor	Signaling	288	0.46	0.846	0.1288	0.03		1	3	0	2006	2017
Glioblastoma Multiforme	C1621958	PGK1	5230	P00558	phosphoglycerate kinase 1	Kinase	144	0.542	0.769	0.76537	0.03		1	3	0	2018	2019
Glioblastoma Multiforme	C1621958	POLE	5426	Q07864	DNA polymerase epsilon, catalytic subunit		151	0.526	0.731	8.0488e-27	0.03		1	3	0	2016	2019
Glioblastoma Multiforme	C1621958	ATR	545	Q13535	ATR serine/threonine kinase	Kinase	321	0.456	0.923	3.5177e-09	0.03		1	3	0	2013	2019
Glioblastoma Multiforme	C1621958	XAF1	54739	Q6GPH4	XIAP associated factor 1		83	0.587	0.769	6.8151e-12	0.03		1	3	0	2007	2019
Glioblastoma Multiforme	C1621958	TET2	54790	Q6N021	tet methylcytosine dioxygenase 2		362	0.458	0.808	4.3334e-54	0.03		1	3	0	2017	2019
Glioblastoma Multiforme	C1621958	ALKBH5	54890	Q6P6C2	alkB homolog 5, RNA demethylase		32	0.686	0.346	0.94974	0.03		1	3	0	2017	2019
Glioblastoma Multiforme	C1621958	PPP1R1A	5502	Q13522	protein phosphatase 1 regulatory inhibitor subunit 1A	Enzyme modulator	106	0.559	0.692	0.021894	0.03		1	3	0	2003	2015
Glioblastoma Multiforme	C1621958	FBXW7	55294	Q969H0	F-box and WD repeat domain containing 7	Enzyme modulator	257	0.465	0.808	0.99949	0.03		1	3	0	2005	2018
Glioblastoma Multiforme	C1621958	PROX1	5629	Q92786	prospero homeobox 1	Transcription factor	114	0.565	0.538	0.99884	0.03		1	3	0	2016	2018
Glioblastoma Multiforme	C1621958	METTL3	56339	Q86U44	methyltransferase like 3		79	0.585	0.538	1.799e-07	0.03		1	3	0	2018	2019
Glioblastoma Multiforme	C1621958	LGMN	5641	Q99538	legumain	Enzyme	95	0.579	0.731	0.00040535	0.03		1	3	0	2017	2019
Glioblastoma Multiforme	C1621958	LINC00470	56651	Q9BZP3	long intergenic non-protein coding RNA 470		14	0.78	0.077		0.03		1	3	0	2018	2020
Glioblastoma Multiforme	C1621958	TIGAR	57103	Q9NQ88	TP53 induced glycolysis regulatory phosphatase		71	0.599	0.692	0.7348	0.03		1	3	0	2011	2019
Glioblastoma Multiforme	C1621958	GOPC	57120	Q9HD26	golgi associated PDZ and coiled-coil motif containing		103	0.561	0.654	0.00084252	0.03		1	3	0	2003	2019
Glioblastoma Multiforme	C1621958	PTBP1	5725	P26599	polypyrimidine tract binding protein 1		172	0.517	0.769	0.99961	0.03		1	3	0	2012	2018
Glioblastoma Multiforme	C1621958	MIR451A	574411		microRNA 451a		177	0.505	0.769		0.03		1	3	0	2008	2017
Glioblastoma Multiforme	C1621958	MRTFA	57591	Q969V6	myocardin related transcription factor A		99	0.572	0.615	0.99768	0.03		1	3	0	2018	2020
Glioblastoma Multiforme	C1621958	NGB	58157	Q9NPG2	neuroglobin	Transporter	56	0.631	0.462	0.0045474	0.03		1	3	0	2009	2017
Glioblastoma Multiforme	C1621958	IL21	59067	Q9HBE4	interleukin 21		321	0.441	0.769	0.6254	0.03		1	3	0	2007	2018
Glioblastoma Multiforme	C1621958	NTN4	59277	Q9HB63	netrin 4	Enzyme modulator	35	0.695	0.538	0.91585	0.03		1	3	0	2012	2018
Glioblastoma Multiforme	C1621958	RET	5979	P07949	ret proto-oncogene	Kinase	607	0.392	0.885	1	0.03		1	3	1	2011	2018
Glioblastoma Multiforme	C1621958	BCL2L2	599	Q92843	BCL2 like 2	Signaling	66	0.599	0.615	0.46908	0.03		1	3	0	2005	2015
Glioblastoma Multiforme	C1621958	BCL6	604	P41182	BCL6 transcription repressor		309	0.444	0.808	0.96038	0.03		1	3	0	2014	2018
Glioblastoma Multiforme	C1621958	ROBO1	6091	Q9Y6N7	roundabout guidance receptor 1		144	0.535	0.731	7.2696e-16	0.03		1	3	0	2015	2019
Glioblastoma Multiforme	C1621958	RPS6	6194	P62753	ribosomal protein S6	Nucleic acid binding	117	0.547	0.692	0.9759	0.03		1	3	0	2013	2018
Glioblastoma Multiforme	C1621958	S100A1	6271	P23297	S100 calcium binding protein A1	Calcium-binding protein	396	0.421	0.846	0.0060044	0.03		1	3	0	1989	2008
Glioblastoma Multiforme	C1621958	S100A4	6275	P26447	S100 calcium binding protein A4	Calcium-binding protein	308	0.448	0.769	0.0061838	0.03		1	3	0	1997	2017
Glioblastoma Multiforme	C1621958	S100A10	6281	P60903	S100 calcium binding protein A10	Calcium-binding protein	150	0.528	0.769	0.16843	0.03		1	3	0	2001	2017
Glioblastoma Multiforme	C1621958	SDCBP	6386	O00560	syndecan binding protein	Transporter	45	0.653	0.385	0.00058136	0.03		1	3	0	2016	2018
Glioblastoma Multiforme	C1621958	SELP	6403	P16109	selectin P		293	0.46	0.769	5.0448e-32	0.03		1	3	0	2009	2018
Glioblastoma Multiforme	C1621958	LRRC4	64101	Q9HBW1	leucine rich repeat containing 4		57	0.617	0.577	0.99787	0.03		1	3	0	2008	2017
Glioblastoma Multiforme	C1621958	SKI	6497	P12755	SKI proto-oncogene		255	0.503	0.808	0.99901	0.03		1	3	0	2014	2017
Glioblastoma Multiforme	C1621958	BMP2	650	P12643	bone morphogenetic protein 2	Signaling	428	0.432	0.846	0.98799	0.03		1	3	0	2009	2019
Glioblastoma Multiforme	C1621958	SLC2A3	6515	P11169	solute carrier family 2 member 3	Transporter	144	0.534	0.769	0.010333	0.03		1	3	0	2010	2017
Glioblastoma Multiforme	C1621958	BMP4	652	P12644	bone morphogenetic protein 4	Signaling	423	0.422	0.808	0.9564	0.03		1	3	0	2014	2020
Glioblastoma Multiforme	C1621958	BMP7	655	P18075	bone morphogenetic protein 7	Signaling	197	0.498	0.769	0.12727	0.03		1	3	0	2012	2015
Glioblastoma Multiforme	C1621958	SMARCB1	6598	Q12824	SWI/SNF related, matrix associated, actin dependent regulator of chromatin, subfamily b, member 1	Nucleic acid binding	448	0.434	0.846	0.9971	0.03		1	3	0	2011	2014
Glioblastoma Multiforme	C1621958	BNIP3	664	Q12983	BCL2 interacting protein 3		158	0.52	0.731	1.9687e-05	0.03		1	3	0	2009	2016
Glioblastoma Multiforme	C1621958	SOD1	6647	P00441	superoxide dismutase 1	Enzyme	689	0.379	0.962	0.1773	0.03		1	3	2	2004	2017
Glioblastoma Multiforme	C1621958	SOS1	6654	Q07889	SOS Ras/Rac guanine nucleotide exchange factor 1	Enzyme modulator	261	0.485	0.808	1	0.03		1	3	0	2013	2019
Glioblastoma Multiforme	C1621958	SOX4	6659	Q06945	SRY-box transcription factor 4	Transcription factor	246	0.489	0.808	0.92656	0.03		1	3	0	2010	2019
Glioblastoma Multiforme	C1621958	SOX11	6664	P35716	SRY-box transcription factor 11	Transcription factor	246	0.494	0.808	0.85844	0.03		1	3	0	2005	2018
Glioblastoma Multiforme	C1621958	ST13	6767	P50502	ST13 Hsp70 interacting protein		81	0.584	0.692	0.66074	0.03		1	3	0	2008	2015
Glioblastoma Multiforme	C1621958	STC1	6781	P52823	stanniocalcin 1	Signaling	137	0.532	0.731	0.20364	0.03		1	3	0	2018	2019
Glioblastoma Multiforme	C1621958	STIM1	6786	Q13586	stromal interaction molecule 1		247	0.501	0.808	0.77534	0.03		1	3	0	2011	2013
Glioblastoma Multiforme	C1621958	ADAM17	6868	P78536	ADAM metallopeptidase domain 17		316	0.453	0.808	0.99528	0.03		1	3	0	2013	2018
Glioblastoma Multiforme	C1621958	TEAD1	7003	P28347	TEA domain transcription factor 1	Transcription factor	116	0.555	0.731	0.9998	0.03		1	3	0	2011	2018
Glioblastoma Multiforme	C1621958	TEK	7010	Q02763	TEK receptor tyrosine kinase	Kinase	300	0.462	0.692	1	0.03		1	3	0	2010	2017
Glioblastoma Multiforme	C1621958	TEP1	7011	Q99973	telomerase associated protein 1		54	0.621	0.654	4.383e-49	0.03		1	3	0	1998	2007
Glioblastoma Multiforme	C1621958	TF	7018	P02787	transferrin	Enzyme	168	0.527	0.846	4.1001e-08	0.03		1	3	0	2014	2018
Glioblastoma Multiforme	C1621958	TGFBI	7045	Q15582	transforming growth factor beta induced	Signaling	225	0.484	0.769	5.9686e-08	0.03		0.667	3	0	2010	2018
Glioblastoma Multiforme	C1621958	TIMP3	7078	P35625	TIMP metallopeptidase inhibitor 3	Enzyme modulator	325	0.445	0.923	0.63037	0.03		1	3	0	2010	2014
Glioblastoma Multiforme	C1621958	TNFAIP3	7128	P21580	TNF alpha induced protein 3	Enzyme	212	0.481	0.808	0.99972	0.03		1	3	0	2006	2018
Glioblastoma Multiforme	C1621958	TRAF2	7186	Q12933	TNF receptor associated factor 2	Signaling	111	0.546	0.769	0.99979	0.03		1	3	0	2008	2017
Glioblastoma Multiforme	C1621958	TRPM2	7226	O94759	transient receptor potential cation channel subfamily M member 2	Ion channel	133	0.546	0.731	8.9633e-44	0.03		1	3	0	2008	2019
Glioblastoma Multiforme	C1621958	TSC1	7248	Q92574	TSC complex subunit 1		391	0.44	0.808	1	0.03		1	3	0	2001	2019
Glioblastoma Multiforme	C1621958	TYMS	7298	P04818	thymidylate synthetase	Enzyme	406	0.425	0.846	0.72247	0.03		1	3	0	2006	2017
Glioblastoma Multiforme	C1621958	USP1	7398	O94782	ubiquitin specific peptidase 1	Enzyme	50	0.641	0.538	0.99691	0.03		1	3	0	2016	2019
Glioblastoma Multiforme	C1621958	VDR	7421	P11473	vitamin D receptor	Nuclear receptor	852	0.352	0.885	1.6787e-05	0.03		1	3	0	2014	2019
Glioblastoma Multiforme	C1621958	TRPV1	7442	Q8NER1	transient receptor potential cation channel subfamily V member 1	Ion channel	404	0.446	0.885	1.0103e-16	0.03		1	3	0	2007	2019
Glioblastoma Multiforme	C1621958	XIST	7503		X inactive specific transcript		146	0.522	0.808		0.03		1	3	0	2015	2020
Glioblastoma Multiforme	C1621958	XRCC3	7517	O43542	X-ray repair cross complementing 3		184	0.505	0.769	1.9134e-10	0.03		1	3	1	2012	2018
Glioblastoma Multiforme	C1621958	YY1	7528	P25490	YY1 transcription factor	Transcription factor	245	0.481	0.808	0.9938	0.03		1	3	0	2012	2019
Glioblastoma Multiforme	C1621958	MIR454	768216		microRNA 454		55	0.617	0.538		0.03		1	3	0	2015	2019
Glioblastoma Multiforme	C1621958	CA12	771	O43570	carbonic anhydrase 12		81	0.592	0.731	1.2849e-11	0.03		1	3	0	2016	2018
Glioblastoma Multiforme	C1621958	SEMA3B	7869	Q13214	semaphorin 3B	Signaling	57	0.633	0.615		0.03		1	3	0	2002	2019
Glioblastoma Multiforme	C1621958	FTO	79068	Q9C0B1	FTO alpha-ketoglutarate dependent dioxygenase		286	0.486	0.885	8.364e-08	0.03		1	3	0	2018	2019
Glioblastoma Multiforme	C1621958	FSD1	79187	Q9BTV5	fibronectin type III and SPRY domain containing 1		220	0.486	0.808	0.25199	0.03		1	3	0	2014	2019
Glioblastoma Multiforme	C1621958	TFEB	7942	P19484	transcription factor EB		150	0.527	0.731	0.89931	0.03		1	3	0	2013	2019
Glioblastoma Multiforme	C1621958	CALM1	801	P0DP23;P0DP24;P0DP25	calmodulin 1	Calcium-binding protein	253	0.472	0.808	0.94473	0.03		1	3	0	2000	2017
Glioblastoma Multiforme	C1621958	PDCD1LG2	80380	Q9BQ51	programmed cell death 1 ligand 2		191	0.496	0.769	1.203e-05	0.03		0.667	3	0	2018	2019
Glioblastoma Multiforme	C1621958	CALM2	805	P0DP23;P0DP24;P0DP25	calmodulin 2	Calcium-binding protein	252	0.472	0.808	0.92086	0.03		1	3	0	2000	2017
Glioblastoma Multiforme	C1621958	CALM3	808	P0DP23;P0DP24;P0DP25	calmodulin 3	Calcium-binding protein	215	0.485	0.846	0.92749	0.03		1	3	0	2000	2017
Glioblastoma Multiforme	C1621958	KMT2D	8085	O14686	lysine methyltransferase 2D		320	0.465	0.808	1	0.03		1	3	0	1999	2017
Glioblastoma Multiforme	C1621958	TRIM8	81603	Q9BZR9	tripartite motif containing 8		121	0.588	0.731	0.99438	0.03		1	3	0	2015	2019
Glioblastoma Multiforme	C1621958	TAM	8205		Myeloproliferative syndrome, transient (transient abnormal		141	0.528	0.731		0.03		1	3	0	2014	2018
Glioblastoma Multiforme	C1621958	FZD7	8324	O75084	frizzled class receptor 7	G-protein coupled receptor	70	0.601	0.538	0.08835	0.03		1	3	0	2016	2019
Glioblastoma Multiforme	C1621958	CASP1	834	P29466	caspase 1	Enzyme	444	0.413	0.885	3.5183e-05	0.03		1	3	1	2004	2019
Glioblastoma Multiforme	C1621958	ARHGAP24	83478	Q8N264	Rho GTPase activating protein 24		273	0.456	0.808	3.9495e-10	0.03		0.667	3	0	2001	2018
Glioblastoma Multiforme	C1621958	FSD1L	83856	Q9BXM9	fibronectin type III and SPRY domain containing 1 like		216	0.488	0.808	0.23386	0.03		1	3	0	2014	2019
Glioblastoma Multiforme	C1621958	TCHP	84260	Q9BT92	trichoplein keratin filament binding		90	0.57	0.692	1.8026e-16	0.03		1	3	0	2012	2019
Glioblastoma Multiforme	C1621958	ORAI1	84876	Q96D31	ORAI calcium release-activated calcium modulator 1	Ion channel	195	0.52	0.808	1.9068e-05	0.03		1	3	0	2011	2015
Glioblastoma Multiforme	C1621958	EIF3B	8662	P55884	eukaryotic translation initiation factor 3 subunit B	Nucleic acid binding	39	0.666	0.346	1	0.03		1	3	0	2012	2019
Glioblastoma Multiforme	C1621958	TRADD	8717	Q15628	TNFRSF1A associated via death domain		26	0.7	0.269	0.099502	0.03		1	3	0	2001	2015
Glioblastoma Multiforme	C1621958	KAT2B	8850	Q92831	lysine acetyltransferase 2B		116	0.563	0.692	0.98975	0.03		1	3	0	2013	2015
Glioblastoma Multiforme	C1621958	APLN	8862	Q9ULZ1	apelin		226	0.497	0.769	0.45897	0.03		1	3	0	2017	2019
Glioblastoma Multiforme	C1621958	CCND2	894	P30279	cyclin D2	Enzyme modulator	241	0.477	0.808	0.98658	0.03		1	3	0	2016	2020
Glioblastoma Multiforme	C1621958	CCND3	896	P30281	cyclin D3	Enzyme modulator	126	0.554	0.654	0.98347	0.03		1	3	0	1999	2012
Glioblastoma Multiforme	C1621958	ATP23	91419	Q9Y6H3	ATP23 metallopeptidase and ATP synthase assembly factor homolog	Enzyme	11	0.792	0.038	1.6095e-05	0.03		1	3	0	2001	2013
Glioblastoma Multiforme	C1621958	OSMR	9180	Q99650	oncostatin M receptor	Signaling	77	0.599	0.577	9.2144e-18	0.03		0.667	3	0	2015	2019
Glioblastoma Multiforme	C1621958	AIMP1	9255	Q12904	aminoacyl tRNA synthetase complex interacting multifunctional protein 1	Enzyme	125	0.566	0.769	3.0411e-07	0.03		1	3	0	2014	2017
Glioblastoma Multiforme	C1621958	SLC9A3R1	9368	O14745	SLC9A3 regulator 1		116	0.547	0.577	8.8416e-05	0.03		1	3	0	2009	2018
Glioblastoma Multiforme	C1621958	COX5A	9377	P20674	cytochrome c oxidase subunit 5A	Enzyme	171	0.515	0.846	0.49407	0.03		1	3	0	2014	2019
Glioblastoma Multiforme	C1621958	NTN1	9423	O95631	netrin 1	Enzyme modulator	209	0.509	0.846	0.99687	0.03		1	3	0	2013	2017
Glioblastoma Multiforme	C1621958	GGPS1	9453	O95749	geranylgeranyl diphosphate synthase 1		44	0.647	0.577	0.26866	0.03		1	3	0	2010	2018
Glioblastoma Multiforme	C1621958	WTAP	9589	Q15007	WT1 associated protein		37	0.659	0.577	0.99966	0.03		1	3	0	2012	2017
Glioblastoma Multiforme	C1621958	CD70	970	P32970	CD70 molecule		127	0.542	0.692	0.010394	0.03		1	3	0	2002	2018
Glioblastoma Multiforme	C1621958	KMT2B	9757	Q9UMN6	lysine methyltransferase 2B		193	0.529	0.808	1	0.03		1	3	0	1999	2017
Glioblastoma Multiforme	C1621958	ZEB2	9839	O60315	zinc finger E-box binding homeobox 2	Transcription factor	292	0.471	0.808	1	0.03		1	3	0	2015	2019
Glioblastoma Multiforme	C1621958	SEPTIN7	989	Q16181	septin 7	Enzyme modulator	26	0.7	0.577	0.99924	0.03		1	3	0	2010	2014
Glioblastoma Multiforme	C1621958	CDH2	1000	P19022	cadherin 2		135	0.535	0.731	0.99171	0.02		1	2	0	1995	2018
Glioblastoma Multiforme	C1621958	MIR744	100126313		microRNA 744		57	0.617	0.615		0.02		1	2	0	2018	2018
Glioblastoma Multiforme	C1621958	MIR873	100126316		microRNA 873		67	0.601	0.538		0.02		1	2	0	2015	2015
Glioblastoma Multiforme	C1621958	MIR940	100126328		microRNA 940		60	0.604	0.577		0.02		1	2	0	2017	2019
Glioblastoma Multiforme	C1621958	AGAP2-AS1	100130776		AGAP2 antisense RNA 1		28	0.691	0.231	0.027534	0.02		1	2	0	2019	2019
Glioblastoma Multiforme	C1621958	LOXL1-AS1	100287616		LOXL1 antisense RNA 1		32	0.678	0.5		0.02		1	2	0	2018	2019
Glioblastoma Multiforme	C1621958	MIR3189	100422943		microRNA 3189		9	0.792	0.077		0.02		1	2	0	2015	2018
Glioblastoma Multiforme	C1621958	HOTAIRM1	100506311		HOXA transcript antisense RNA, myeloid-specific 1		46	0.638	0.538		0.02		1	2	0	2018	2019
Glioblastoma Multiforme	C1621958	BCL2L2-PABPN1	100529063	Q92843	BCL2L2-PABPN1 readthrough		40	0.653	0.5	0.27913	0.02		1	2	0	2005	2011
Glioblastoma Multiforme	C1621958	DPP3	10072	Q9NY33	dipeptidyl peptidase 3	Enzyme	13	0.769	0.192	6.7954e-11	0.02		1	2	0	2010	2014
Glioblastoma Multiforme	C1621958	PTPRU	10076	Q92729	protein tyrosine phosphatase receptor type U	Enzyme	88	0.581	0.654	0.39251	0.02		1	2	0	2012	2018
Glioblastoma Multiforme	C1621958	TRAP1	10131	Q12931	TNF receptor associated protein 1	Chaperone	90	0.59	0.615	1.5965e-29	0.02		1	2	0	2019	2019
Glioblastoma Multiforme	C1621958	OPTN	10133	Q96CV9	optineurin		136	0.548	0.808	5.91e-18	0.02		1	2	0	2000	2004
Glioblastoma Multiforme	C1621958	G3BP1	10146	Q13283	G3BP stress granule assembly factor 1	Nucleic acid binding	78	0.597	0.654	0.033122	0.02		1	2	0	2019	2019
Glioblastoma Multiforme	C1621958	TENM1	10178	Q9UKZ4	teneurin transmembrane protein 1		43	0.653	0.692	1	0.02		1	2	0	2017	2019
Glioblastoma Multiforme	C1621958	CDK5	1020	Q00535	cyclin dependent kinase 5	Kinase	204	0.495	0.846	0.13892	0.02		1	2	0	2015	2019
Glioblastoma Multiforme	C1621958	CDK7	1022	P50613	cyclin dependent kinase 7	Kinase	89	0.566	0.731	4.4725e-07	0.02		1	2	0	2012	2018
Glioblastoma Multiforme	C1621958	CDK9	1025	P50750	cyclin dependent kinase 9	Kinase	204	0.498	0.769	8.893e-05	0.02		1	2	0	2012	2018
Glioblastoma Multiforme	C1621958	SPRY1	10252	O43609	sprouty RTK signaling antagonist 1	Signaling	63	0.603	0.577	0.0030398	0.02		1	2	0	2017	2018
Glioblastoma Multiforme	C1621958	SPRY2	10253	O43597	sprouty RTK signaling antagonist 2	Signaling	111	0.554	0.654	0.97126	0.02		1	2	0	2015	2018
Glioblastoma Multiforme	C1621958	PAK4	10298	O96013	p21 (RAC1) activated kinase 4	Kinase	81	0.584	0.731	4.3602e-05	0.02		1	2	0	2015	2017
Glioblastoma Multiforme	C1621958	DLEU1	10301	O43261	deleted in lymphocytic leukemia 1		109	0.569	0.692	0.47033	0.02		1	2	0	2019	2019
Glioblastoma Multiforme	C1621958	CDKN3	1033	Q16667	cyclin dependent kinase inhibitor 3		150	0.514	0.769	0.0019455	0.02		1	2	0	2007	2015
Glioblastoma Multiforme	C1621958	SEMA3A	10371	Q14563	semaphorin 3A	Signaling	202	0.5	0.808	0.9779	0.02		1	2	0	2018	2018
Glioblastoma Multiforme	C1621958	TUBA1B	10376	P68363	tubulin alpha 1b	Cellular structure	96	0.568	0.692	0.96767	0.02		1	2	0	2018	2019
Glioblastoma Multiforme	C1621958	IRF9	10379	Q00978	interferon regulatory factor 9	Transcription factor	60	0.61	0.577	0.60773	0.02		1	2	0	2010	2015
Glioblastoma Multiforme	C1621958	CDR1	1038	P51861	cerebellar degeneration related protein 1		87	0.576	0.808		0.02		1	2	0	2016	2019
Glioblastoma Multiforme	C1621958	RACK1	10399	P63244	receptor for activated C kinase 1		118	0.545	0.808	0.99836	0.02		1	2	0	2004	2019
Glioblastoma Multiforme	C1621958	PIAS3	10401	Q9Y6X2	protein inhibitor of activated STAT 3		63	0.608	0.5	0.98499	0.02		1	2	0	2010	2017
Glioblastoma Multiforme	C1621958	VAV3	10451	Q9UKW4	vav guanine nucleotide exchange factor 3		77	0.603	0.615	8.4532e-14	0.02		1	2	0	2008	2012
Glioblastoma Multiforme	C1621958	ZBTB18	10472	Q99592	zinc finger and BTB domain containing 18	Transcription factor	57	0.666	0.5	0.99658	0.02		1	2	0	2010	2017
Glioblastoma Multiforme	C1621958	VAT1	10493	Q99536	vesicle amine transport 1		21	0.729	0.346	0.0054627	0.02		1	2	0	2009	2019
Glioblastoma Multiforme	C1621958	SEMA3C	10512	Q99985	semaphorin 3C	Signaling	71	0.619	0.731	0.00087445	0.02		1	2	0	2017	2019
Glioblastoma Multiforme	C1621958	CEBPD	1052	P49716	CCAAT enhancer binding protein delta	Transcription factor	97	0.57	0.769	0.61219	0.02		1	2	0	2012	2016
Glioblastoma Multiforme	C1621958	ATG7	10533	O95352	autophagy related 7	Enzyme	179	0.505	0.769	7.3758e-12	0.02		1	2	0	2013	2017
Glioblastoma Multiforme	C1621958	AGR2	10551	O95994	anterior gradient 2, protein disulphide isomerase family member	Enzyme	108	0.556	0.692	9.2381e-08	0.02		1	2	0	2013	2016
Glioblastoma Multiforme	C1621958	PDLIM5	10611	Q96HC4	PDZ and LIM domain 5	Cellular structure	148	0.525	0.808	0.0016769	0.02		1	2	0	2014	2020
Glioblastoma Multiforme	C1621958	IGF2BP2	10644	Q9Y6M1	insulin like growth factor 2 mRNA binding protein 2	Enzyme	94	0.588	0.615	0.23861	0.02		1	2	0	2012	2016
Glioblastoma Multiforme	C1621958	TNFSF13B	10673	Q9Y275	TNF superfamily member 13b		282	0.46	0.731	0.98193	0.02		1	2	0	2006	2018
Glioblastoma Multiforme	C1621958	EBP	10682	Q15125	EBP cholestenol delta-isomerase	Enzyme	243	0.494	0.846	0.93645	0.02		1	2	0	1995	2010
Glioblastoma Multiforme	C1621958	NFAT5	10725	O94916	nuclear factor of activated T cells 5	Transcription factor	88	0.601	0.692	1	0.02		1	2	0	2017	2019
Glioblastoma Multiforme	C1621958	PLK4	10733	O00444	polo like kinase 4	Kinase	135	0.551	0.731	7.0844e-06	0.02		1	2	0	2019	2019
Glioblastoma Multiforme	C1621958	PLK2	10769	Q9NYY3	polo like kinase 2	Kinase	97	0.575	0.808	0.9999	0.02		1	2	0	2013	2019
Glioblastoma Multiforme	C1621958	NEU3	10825	Q9UQ49	neuraminidase 3	Enzyme	39	0.666	0.654	2.4425e-08	0.02		1	2	0	2017	2019
Glioblastoma Multiforme	C1621958	PPP1R13L	10848	Q8WUF5	protein phosphatase 1 regulatory subunit 13 like		122	0.539	0.692	0.03206	0.02		0.5	2	0	2011	2013
Glioblastoma Multiforme	C1621958	MALT1	10892	Q9UDY8	MALT1 paracaspase	Enzyme	148	0.532	0.769	0.98651	0.02		1	2	0	2017	2020
Glioblastoma Multiforme	C1621958	STIP1	10963	P31948	stress induced phosphoprotein 1		85	0.578	0.692	0.99987	0.02		1	2	0	2008	2019
Glioblastoma Multiforme	C1621958	METAP2	10988	P50579	methionyl aminopeptidase 2		78	0.593	0.769	0.0039908	0.02		1	2	0	2014	2018
Glioblastoma Multiforme	C1621958	SLC27A3	11000	Q5K4L6	solute carrier family 27 member 3	Transporter	16	0.769	0.115	5.2696e-22	0.02		1	2	0	2013	2014
Glioblastoma Multiforme	C1621958	GLIPR1	11010	P48060	GLI pathogenesis related 1	Immune response	48	0.636	0.5	2.072e-14	0.02		1	2	0	1995	2015
Glioblastoma Multiforme	C1621958	RIPK3	11035	Q9Y572	receptor interacting serine/threonine kinase 3	Kinase	196	0.497	0.885	1.1874e-14	0.02		1	2	0	2011	2017
Glioblastoma Multiforme	C1621958	TENT4A	11044	Q5XG87	terminal nucleotidyltransferase 4A	Enzyme	22	0.716	0.269	0.99934	0.02		1	2	0	2016	2019
Glioblastoma Multiforme	C1621958	CHD4	1108	Q14839	chromodomain helicase DNA binding protein 4		94	0.593	0.654	1	0.02		1	2	0	2014	2019
Glioblastoma Multiforme	C1621958	ADAMTS5	11096	Q9UNA0	ADAM metallopeptidase with thrombospondin type 1 motif 5	Enzyme	85	0.597	0.654	8.0325e-07	0.02		1	2	0	2005	2006
Glioblastoma Multiforme	C1621958	PTP4A3	11156	O75365	protein tyrosine phosphatase 4A3		106	0.566	0.654	0.045489	0.02		1	2	0	2016	2018
Glioblastoma Multiforme	C1621958	FAM107A	11170	O95990	family with sequence similarity 107 member A		36	0.674	0.462	8.2783e-07	0.02		1	2	0	2018	2018
Glioblastoma Multiforme	C1621958	TREH	11181	O43280	trehalase		42	0.67	0.654	8.9579e-15	0.02		1	2	1	2010	2015
Glioblastoma Multiforme	C1621958	ZHX1	11244	Q9UKY1	zinc fingers and homeoboxes 1	Transcription factor	23	0.711	0.346	0.80424	0.02		1	2	0	2017	2019
Glioblastoma Multiforme	C1621958	VSIG4	11326	Q9Y279	V-set and immunoglobulin domain containing 4		51	0.628	0.615	1.4953e-09	0.02		1	2	0	2016	2019
Glioblastoma Multiforme	C1621958	ACOT7	11332	O00154	acyl-CoA thioesterase 7	Enzyme	146	0.531	0.769	0.75926	0.02		1	2	0	2015	2017
Glioblastoma Multiforme	C1621958	TUSC2	11334	O75896	tumor suppressor 2, mitochondrial calcium regulator		111	0.556	0.846	0.7671	0.02		1	2	0	2014	2015
Glioblastoma Multiforme	C1621958	MCM3AP-AS1	114044		MCM3AP antisense RNA 1		16	0.76	0.154		0.02		1	2	0	2017	2020
Glioblastoma Multiforme	C1621958	CYGB	114757	Q8WWM9	cytoglobin		88	0.579	0.577	0.10249	0.02		1	2	0	2011	2014
Glioblastoma Multiforme	C1621958	CKB	1152	P12277	creatine kinase B	Kinase	73	0.608	0.615	0.2189	0.02		0.5	2	0	1995	1999
Glioblastoma Multiforme	C1621958	LRG1	116844	P02750	leucine rich alpha-2-glycoprotein 1		109	0.564	0.731	0.095143	0.02		1	2	0	2015	2018
Glioblastoma Multiforme	C1621958	AGAP2	116986	Q99490	ArfGAP with GTPase domain, ankyrin repeat and PH domain 2		24	0.729	0.385	0.99816	0.02		1	2	0	2013	2017
Glioblastoma Multiforme	C1621958	ADCYAP1R1	117	P41586	ADCYAP receptor type I	G-protein coupled receptor	118	0.561	0.769	7.2275e-10	0.02		1	2	0	2017	2017
Glioblastoma Multiforme	C1621958	PRAP1	118471	Q96NZ9	proline rich acidic protein 1		59	0.621	0.615	0.032463	0.02		1	2	0	1997	2001
Glioblastoma Multiforme	C1621958	CLU	1191	P10909	clusterin		412	0.426	0.885	7.8072e-05	0.02		1	2	0	1991	2017
Glioblastoma Multiforme	C1621958	CLN3	1201	Q13286	CLN3 lysosomal/endosomal transmembrane protein, battenin	Transporter	120	0.572	0.692	1.3327e-07	0.02		0.5	2	0	1991	2002
Glioblastoma Multiforme	C1621958	SPPL3	121665	Q8TCT6	signal peptide peptidase like 3	Enzyme	50	0.638	0.615	0.99656	0.02		1	2	0	2012	2016
Glioblastoma Multiforme	C1621958	CCR3	1232	P51677	C-C motif chemokine receptor 3	G-protein coupled receptor	149	0.527	0.808	0.00012636	0.02		1	2	0	2005	2016
Glioblastoma Multiforme	C1621958	CNP	1267	P09543	2',3'-cyclic nucleotide 3' phosphodiesterase	Enzyme	70	0.604	0.692	0.98405	0.02		1	2	0	2012	2017
Glioblastoma Multiforme	C1621958	NMS	129521	Q5H8A3	neuromedin S		33	0.711	0.423	1.3331e-11	0.02		1	2	0	2015	2018
Glioblastoma Multiforme	C1621958	CPE	1363	P16870	carboxypeptidase E		101	0.584	0.692	0.99233	0.02		1	2	0	2012	2017
Glioblastoma Multiforme	C1621958	CRKL	1399	P46109	CRK like proto-oncogene, adaptor protein		140	0.553	0.769	0.44604	0.02		0.5	2	0	2013	2014
Glioblastoma Multiforme	C1621958	CRMP1	1400	Q14194	collapsin response mediator protein 1	Enzyme	148	0.525	0.808	0.99173	0.02		1	2	0	2009	2014
Glioblastoma Multiforme	C1621958	PRIMA1	145270	Q86XR5	proline rich membrane anchor 1		69	0.595	0.615	0.62894	0.02		1	2	0	2013	2016
Glioblastoma Multiforme	C1621958	CTAG1B	1485	P78358	cancer/testis antigen 1B		166	0.507	0.731		0.02		1	2	0	2011	2019
Glioblastoma Multiforme	C1621958	CTSD	1509	P07339	cathepsin D	Enzyme	242	0.478	0.846	0.00091747	0.02		1	2	0	2005	2020
Glioblastoma Multiforme	C1621958	RMDN2	151393	Q96LZ7	regulator of microtubule dynamics 2		137	0.531	0.769	4.4061e-24	0.02		1	2	0	2008	2018
Glioblastoma Multiforme	C1621958	CX3CR1	1524	P49238	C-X3-C motif chemokine receptor 1	G-protein coupled receptor	310	0.457	0.885	0.061371	0.02		1	2	1	2008	2015
Glioblastoma Multiforme	C1621958	LINC00599	157627		long intergenic non-protein coding RNA 599		17	0.76	0.192		0.02		1	2	0	2018	2019
Glioblastoma Multiforme	C1621958	CYP19A1	1588	P11511	cytochrome P450 family 19 subfamily A member 1	Enzyme	519	0.41	0.885	1.7022e-05	0.02		1	2	0	2004	2017
Glioblastoma Multiforme	C1621958	DBI	1622	P07108	diazepam binding inhibitor, acyl-CoA binding protein	Enzyme modulator	52	0.65	0.654	0.0013944	0.02		1	2	0	2019	2019
Glioblastoma Multiforme	C1621958	DCN	1634	P07585	decorin		297	0.457	0.808	0.31231	0.02		1	2	0	2006	2020
Glioblastoma Multiforme	C1621958	GADD45A	1647	P24522	growth arrest and DNA damage inducible alpha		151	0.526	0.769	0.044075	0.02		1	2	1	2017	2017
Glioblastoma Multiforme	C1621958	DDIT3	1649	P35638	DNA damage inducible transcript 3		264	0.467	0.846	0.59066	0.02		1	2	0	2011	2018
Glioblastoma Multiforme	C1621958	AEBP1	165	Q8IUX7	AE binding protein 1		69	0.631	0.654	7.3471e-11	0.02		1	2	0	2012	2019
Glioblastoma Multiforme	C1621958	DES	1674	P17661	desmin		330	0.46	0.846	0.0088282	0.02		1	2	0	2012	2019
Glioblastoma Multiforme	C1621958	DLD	1738	P09622	dihydrolipoamide dehydrogenase	Enzyme	190	0.517	0.769	0.0095142	0.02		1	2	0	2002	2019
Glioblastoma Multiforme	C1621958	DOCK1	1793	Q14185	dedicator of cytokinesis 1		58	0.641	0.577	0.0068117	0.02		1	2	0	2017	2018
Glioblastoma Multiforme	C1621958	DPYSL2	1808	Q16555	dihydropyrimidinase like 2	Enzyme	93	0.585	0.692	0.99375	0.02		1	2	0	2018	2019
Glioblastoma Multiforme	C1621958	DRD5	1816	P21918	dopamine receptor D5	G-protein coupled receptor	73	0.603	0.423	1.348e-16	0.02		1	2	0	2019	2020
Glioblastoma Multiforme	C1621958	AGT	183	P01019	angiotensinogen	Enzyme modulator	765	0.367	0.923	4.9706e-08	0.02		0.5	2	0	2004	2008
Glioblastoma Multiforme	C1621958	HBEGF	1839	Q99075	heparin binding EGF like growth factor	Signaling	155	0.52	0.769	0.07563	0.02		1	2	0	2017	2018
Glioblastoma Multiforme	C1621958	DTX1	1840	Q86Y01	deltex E3 ubiquitin ligase 1	Enzyme	38	0.656	0.5	0.00098982	0.02		1	2	0	2013	2016
Glioblastoma Multiforme	C1621958	DUSP2	1844	Q05923	dual specificity phosphatase 2		118	0.558	0.769	4.4697e-05	0.02		1	2	0	2017	2017
Glioblastoma Multiforme	C1621958	DYRK1A	1859	Q13627	dual specificity tyrosine phosphorylation regulated kinase 1A	Kinase	212	0.533	0.769	0.99967	0.02		1	2	0	2013	2018
Glioblastoma Multiforme	C1621958	APLNR	187	P35414	apelin receptor	G-protein coupled receptor	94	0.588	0.692	0.78907	0.02		1	2	0	2017	2019
Glioblastoma Multiforme	C1621958	E2F3	1871	O00716	E2F transcription factor 3	Nucleic acid binding	98	0.57	0.692	0.9458	0.02		1	2	0	2012	2019
Glioblastoma Multiforme	C1621958	E2F5	1875	Q15329	E2F transcription factor 5	Nucleic acid binding	31	0.686	0.308	0.935	0.02		1	2	0	2017	2018
Glioblastoma Multiforme	C1621958	ECT2	1894	Q9H8V3	epithelial cell transforming 2		65	0.603	0.615	8.0837e-10	0.02		1	2	0	2008	2012
Glioblastoma Multiforme	C1621958	ABCA1	19	O95477	ATP binding cassette subfamily A member 1	Transporter	291	0.467	0.846	1.4525e-13	0.02		1	2	0	2019	2019
Glioblastoma Multiforme	C1621958	S1PR1	1901	P21453	sphingosine-1-phosphate receptor 1	G-protein coupled receptor	126	0.546	0.769	0.73269	0.02		1	2	0	2014	2018
Glioblastoma Multiforme	C1621958	EDNRB	1910	P24530	endothelin receptor type B	G-protein coupled receptor	300	0.47	0.846	0.0092419	0.02		1	2	0	2000	2000
Glioblastoma Multiforme	C1621958	EEF1B2P2	1934		eukaryotic translation elongation factor 1 beta 2 pseudogene 2		58	0.612	0.577		0.02		1	2	0	2014	2015
Glioblastoma Multiforme	C1621958	EFNB3	1949	Q15768	ephrin B3	Signaling	22	0.736	0.231	0.3205	0.02		1	2	0	2006	2017
Glioblastoma Multiforme	C1621958	EIF4E	1977	P06730	eukaryotic translation initiation factor 4E	Nucleic acid binding	317	0.448	0.846	0.94133	0.02		1	2	0	1995	2018
Glioblastoma Multiforme	C1621958	EIF5A	1984	P63241	eukaryotic translation initiation factor 5A	Nucleic acid binding	68	0.612	0.692	0.73709	0.02		1	2	0	2012	2020
Glioblastoma Multiforme	C1621958	ELF4	2000	Q99607	E74 like ETS transcription factor 4	Transcription factor	45	0.644	0.462	0.06139	0.02		1	2	0	2012	2017
Glioblastoma Multiforme	C1621958	CRTC2	200186	Q53ET0	CREB regulated transcription coactivator 2	Transcription factor	56	0.633	0.538	0.99891	0.02		1	2	0	2013	2019
Glioblastoma Multiforme	C1621958	TET3	200424	O43151	tet methylcytosine dioxygenase 3		59	0.633	0.615	1	0.02		1	2	0	2016	2020
Glioblastoma Multiforme	C1621958	EPHA4	2043	P54764	EPH receptor A4	Kinase	118	0.566	0.846	1	0.02		1	2	0	2008	2017
Glioblastoma Multiforme	C1621958	EPS8	2059	Q12929	epidermal growth factor receptor pathway substrate 8	Receptor	73	0.608	0.615	0.97308	0.02		1	2	0	2012	2019
Glioblastoma Multiforme	C1621958	ESR1	2099	P03372	estrogen receptor 1	Nuclear receptor	1101	0.324	0.962	0.9992	0.02		1	2	0	2016	2019
Glioblastoma Multiforme	C1621958	ETS1	2113	P14921	ETS proto-oncogene 1, transcription factor	Transcription factor	327	0.444	0.731	0.7816	0.02		1	2	0	2018	2020
Glioblastoma Multiforme	C1621958	ETS2	2114	P15036	ETS proto-oncogene 2, transcription factor	Transcription factor	115	0.548	0.808	0.99888	0.02		1	2	0	1994	2020
Glioblastoma Multiforme	C1621958	ALCAM	214	Q13740	activated leukocyte cell adhesion molecule	Cell adhesion	181	0.502	0.808	0.73267	0.02		1	2	0	2012	2014
Glioblastoma Multiforme	C1621958	F2RL1	2150	P55085	F2R like trypsin receptor 1	G-protein coupled receptor	256	0.48	0.769	0.00014843	0.02		1	2	0	2010	2014
Glioblastoma Multiforme	C1621958	F10	2159	P00742	coagulation factor X	Enzyme	228	0.493	0.769	2.3473e-06	0.02		1	2	0	1999	2018
Glioblastoma Multiforme	C1621958	FAAH	2166	O00519	fatty acid amide hydrolase		177	0.545	0.692	4.4449e-11	0.02		1	2	0	2017	2019
Glioblastoma Multiforme	C1621958	ALDH3A1	218	P30838	aldehyde dehydrogenase 3 family member A1		53	0.641	0.577	3.9013e-17	0.02		1	2	0	2014	2018
Glioblastoma Multiforme	C1621958	FAP	2191	Q12884	fibroblast activation protein alpha	Enzyme	216	0.496	0.808	1.9009e-28	0.02		1	2	0	2016	2018
Glioblastoma Multiforme	C1621958	FASN	2194	P49327	fatty acid synthase	Enzyme	245	0.474	0.846	1	0.02		1	2	0	2018	2018
Glioblastoma Multiforme	C1621958	FOXK1	221937	P85037	forkhead box K1		51	0.631	0.462	0.80522	0.02		1	2	0	2018	2019
Glioblastoma Multiforme	C1621958	FGF13	2258	Q92913	fibroblast growth factor 13	Signaling	167	0.514	0.808	0.89489	0.02		1	2	0	1996	2018
Glioblastoma Multiforme	C1621958	FHIT	2272	P49789	fragile histidine triad diadenosine triphosphatase		337	0.444	0.846	0.0057055	0.02		0.5	2	0	2010	2012
Glioblastoma Multiforme	C1621958	ZHX2	22882	Q9Y6X8	zinc fingers and homeoboxes 2	Transcription factor	172	0.51	0.654	0.03372	0.02		1	2	0	2008	2009
Glioblastoma Multiforme	C1621958	FKBP5	2289	Q13451	FKBP prolyl isomerase 5	Enzyme	179	0.524	0.769	0.73393	0.02		1	2	0	2017	2019
Glioblastoma Multiforme	C1621958	MMRN1	22915	Q13201	multimerin 1		272	0.465	0.846	2.0714e-25	0.02		1	2	0	2017	2018
Glioblastoma Multiforme	C1621958	RAB3GAP1	22930	Q15042	RAB3 GTPase activating protein catalytic subunit 1		138	0.566	0.692	1.4523e-07	0.02		0.5	2	0	1999	2003
Glioblastoma Multiforme	C1621958	SCAP	22937	Q12770	SREBF chaperone		35	0.682	0.462	2.9094e-06	0.02		1	2	0	2015	2016
Glioblastoma Multiforme	C1621958	SNW1	22938	Q13573	SNW domain containing 1	Transcription factor	29	0.682	0.423	0.99961	0.02		1	2	0	2015	2019
Glioblastoma Multiforme	C1621958	PTGR1	22949	Q14914	prostaglandin reductase 1	Enzyme	32	0.729	0.231	3.5375e-08	0.02		0.5	2	0	2016	2018
Glioblastoma Multiforme	C1621958	SMG1	23049	Q96Q15	SMG1 nonsense mediated mRNA decay associated PI3K related kinase	Kinase	90	0.575	0.808	1	0.02		1	2	0	2008	2017
Glioblastoma Multiforme	C1621958	CIC	23152	Q96RK0	capicua transcriptional repressor		141	0.523	0.692	0.99999	0.02		1	2	0	2011	2019
Glioblastoma Multiforme	C1621958	MPRIP	23164	Q6WCQ1	myosin phosphatase Rho interacting protein	Enzyme modulator	113	0.556	0.885	0.98078	0.02		1	2	0	2011	2017
Glioblastoma Multiforme	C1621958	PLEKHM2	23207	Q8IWE5	pleckstrin homology and RUN domain containing M2		24	0.7	0.462	1.7077e-05	0.02		1	2	0	2015	2019
Glioblastoma Multiforme	C1621958	FLT3	2322	P36888	fms related receptor tyrosine kinase 3	Kinase	270	0.462	0.654	0.60777	0.02		1	2	1	2007	2013
Glioblastoma Multiforme	C1621958	PHLPP1	23239	O60346	PH domain and leucine rich repeat protein phosphatase 1	Epigenetic regulator	73	0.597	0.654	0.99927	0.02		1	2	0	2011	2016
Glioblastoma Multiforme	C1621958	CAMTA1	23261	Q9Y6Y1	calmodulin binding transcription activator 1	Transcription factor	112	0.599	0.615	1	0.02		1	2	0	2011	2013
Glioblastoma Multiforme	C1621958	FMOD	2331	Q06828	fibromodulin		54	0.623	0.538	0.0023576	0.02		1	2	0	2017	2018
Glioblastoma Multiforme	C1621958	PHF3	23469	Q92576	PHD finger protein 3	Nucleic acid binding	12	0.76	0.192	0.99256	0.02		1	2	0	2001	2001
Glioblastoma Multiforme	C1621958	MACF1	23499	Q9UPN3	microtubule actin crosslinking factor 1	Cellular structure	62	0.659	0.538	1	0.02		1	2	0	2017	2017
Glioblastoma Multiforme	C1621958	FPR1	2357	P21462	formyl peptide receptor 1	G-protein coupled receptor	93	0.576	0.769		0.02		1	2	0	2013	2015
Glioblastoma Multiforme	C1621958	CLEC5A	23601	Q9NY25	C-type lectin domain containing 5A		37	0.663	0.346	0.12568	0.02		1	2	0	2019	2019
Glioblastoma Multiforme	C1621958	BACE1	23621	P56817	beta-secretase 1	Enzyme	120	0.559	0.769	0.87888	0.02		1	2	0	2012	2014
Glioblastoma Multiforme	C1621958	NUP62	23636	P37198	nucleoporin 62	Transporter	273	0.47	0.885	0.95006	0.02		1	2	0	2013	2019
Glioblastoma Multiforme	C1621958	CTAG1A	246100	P78358	cancer/testis antigen 1A		161	0.508	0.731		0.02		1	2	0	2011	2019
Glioblastoma Multiforme	C1621958	ALPI	248	P09923	alkaline phosphatase, intestinal	Enzyme	98	0.563	0.769	2.4527e-18	0.02		1	2	0	2013	2018
Glioblastoma Multiforme	C1621958	FRZB	2487	Q92765	frizzled related protein		89	0.573	0.654	0.0010842	0.02		1	2	0	2014	2017
Glioblastoma Multiforme	C1621958	ALPP	250	P05187	alkaline phosphatase, placental	Enzyme	209	0.487	0.808	1.8144e-13	0.02		1	2	0	2013	2018
Glioblastoma Multiforme	C1621958	FUT4	2526	P22083	fucosyltransferase 4	Enzyme	168	0.505	0.731	7.7294e-06	0.02		1	2	0	2013	2013
Glioblastoma Multiforme	C1621958	G6PC	2538	P35575	glucose-6-phosphatase catalytic subunit		132	0.56	0.692	1.8404e-05	0.02		1	2	0	2007	2008
Glioblastoma Multiforme	C1621958	SLC37A4	2542	O43826	solute carrier family 37 member 4	Transporter	73	0.617	0.654	1.6748e-05	0.02		1	2	0	2007	2008
Glioblastoma Multiforme	C1621958	XRCC6	2547	P12956	X-ray repair cross complementing 6	Enzyme	119	0.552	0.769	0.99904	0.02		1	2	0	2004	2017
Glioblastoma Multiforme	C1621958	GAB1	2549	Q13480	GRB2 associated binding protein 1	Receptor	82	0.584	0.654	0.18433	0.02		1	2	0	2004	2014
Glioblastoma Multiforme	C1621958	PTF1A	256297	Q7RTS3	pancreas associated transcription factor 1a		83	0.601	0.692	0.16565	0.02		1	2	0	2010	2015
Glioblastoma Multiforme	C1621958	SHPRH	257218	Q149N8	SNF2 histone linker PHD RING helicase		10	0.821	0.077	1.7017e-06	0.02		1	2	0	2018	2018
Glioblastoma Multiforme	C1621958	ASPM	259266	Q8IZT6	abnormal spindle microtubule assembly		159	0.526	0.769	3.3502e-49	0.02		1	2	0	2008	2011
Glioblastoma Multiforme	C1621958	ARHGEF26	26084	Q96DR7	Rho guanine nucleotide exchange factor 26		13	0.78	0.115	1.8567e-14	0.02		1	2	0	2013	2016
Glioblastoma Multiforme	C1621958	CHTOP	26097	Q9Y3Y2	chromatin target of PRMT1	Nucleic acid binding	21	0.722	0.346	0.76399	0.02		1	2	0	2014	2014
Glioblastoma Multiforme	C1621958	GAS6	2621	Q14393	growth arrest specific 6	Extracellular structure	190	0.5	0.769	0.034477	0.02		1	2	0	2015	2019
Glioblastoma Multiforme	C1621958	GATA3	2625	P23771	GATA binding protein 3		429	0.415	0.846	0.89887	0.02		0.5	2	0	2017	2019
Glioblastoma Multiforme	C1621958	AMFR	267	Q9UKV5	autocrine motility factor receptor		71	0.599	0.692	5.8368e-05	0.02		1	2	2	2018	2018
Glioblastoma Multiforme	C1621958	GFPT1	2673	Q06210	glutamine--fructose-6-phosphate transaminase 1	Enzyme	104	0.612	0.654	0.89953	0.02		1	2	0	2019	2019
Glioblastoma Multiforme	C1621958	FOXP1	27086	Q9H334	forkhead box P1		317	0.46	0.808	0.99998	0.02		1	2	0	2014	2015
Glioblastoma Multiforme	C1621958	BHLHE22	27319	Q8NFJ8	basic helix-loop-helix family member e22	Enzyme	67	0.595	0.692	0.79994	0.02		1	2	0	2014	2015
Glioblastoma Multiforme	C1621958	POLL	27343	Q9UGP5	DNA polymerase lambda	Enzyme	26	0.711	0.346	1.5836e-10	0.02		1	2	0	2016	2019
Glioblastoma Multiforme	C1621958	GLI3	2737	P10071	GLI family zinc finger 3		400	0.436	0.846	0.99999	0.02		1	2	0	2002	2008
Glioblastoma Multiforme	C1621958	GMFB	2764	P60983	glia maturation factor beta	Enzyme modulator	17	0.743	0.308	0.0053339	0.02		1	2	0	2011	2014
Glioblastoma Multiforme	C1621958	GPC1	2817	P35052	glypican 1		96	0.587	0.731	0.015547	0.02		1	2	0	2017	2018
Glioblastoma Multiforme	C1621958	GPI	2821	P06744	glucose-6-phosphate isomerase	Enzyme	218	0.491	0.769	2.8385e-06	0.02		1	2	0	2016	2018
Glioblastoma Multiforme	C1621958	SBF2-AS1	283104		SBF2 antisense RNA 1		35	0.67	0.385		0.02		1	2	0	2017	2019
Glioblastoma Multiforme	C1621958	NOB1	28987	Q9ULX3	NIN1 (RPN12) binding protein 1 homolog		50	0.633	0.423	1.1349e-09	0.02		1	2	0	2018	2019
Glioblastoma Multiforme	C1621958	UHRF1	29128	Q96T88	ubiquitin like with PHD and ring finger domains 1		125	0.54	0.692		0.02		1	2	0	2010	2015
Glioblastoma Multiforme	C1621958	PDIA3	2923	P30101	protein disulfide isomerase family A member 3		100	0.566	0.769	0.99608	0.02		1	2	0	2019	2020
Glioblastoma Multiforme	C1621958	GSR	2936	P00390	glutathione-disulfide reductase	Enzyme	206	0.494	0.846	1.2922e-06	0.02		1	2	0	2018	2019
Glioblastoma Multiforme	C1621958	GTF2H1	2965	P32780	general transcription factor IIH subunit 1	Transcription factor	258	0.469	0.846	0.98982	0.02		1	2	0	2013	2019
Glioblastoma Multiforme	C1621958	RMC1	29919	Q96DM3	regulator of MON1-CCZ1		110	0.555	0.731	0.98823	0.02		1	2	0	2002	2009
Glioblastoma Multiforme	C1621958	ANXA1	301	P04083	annexin A1		336	0.442	0.885	1.2009e-07	0.02		1	2	0	2008	2015
Glioblastoma Multiforme	C1621958	HELLS	3070	Q9NRZ9	helicase, lymphoid specific		84	0.603	0.731	0.99979	0.02		1	2	0	2017	2019
Glioblastoma Multiforme	C1621958	CFH	3075	P08603	complement factor H		393	0.441	0.885	0.86061	0.02		1	2	0	2000	2019
Glioblastoma Multiforme	C1621958	ACACA	31	Q13085	acetyl-CoA carboxylase alpha		241	0.48	0.846	1	0.02		1	2	0	2017	2020
Glioblastoma Multiforme	C1621958	HLA-DRB1	3123	P01911	major histocompatibility complex, class II, DR beta 1	Immune response	1018	0.333	0.923	0.0010997	0.02		1	2	0	2011	2013
Glioblastoma Multiforme	C1621958	HNRNPA2B1	3181	P22626	heterogeneous nuclear ribonucleoprotein A2/B1		131	0.566	0.808	0.99732	0.02		1	2	0	2011	2019
Glioblastoma Multiforme	C1621958	HOXA@	3197		homeobox A cluster		66	0.599	0.654		0.02		1	2	0	2010	2015
Glioblastoma Multiforme	C1621958	HOXA10	3206	P31260	homeobox A10		122	0.538	0.692	0.88453	0.02		1	2	1	2010	2015
Glioblastoma Multiforme	C1621958	HOXB2	3212	P14652	homeobox B2		52	0.612	0.577	0.00014636	0.02		1	2	0	1992	2019
Glioblastoma Multiforme	C1621958	HOXB3	3213	P14651	homeobox B3		49	0.631	0.615	0.8917	0.02		1	2	0	1992	2018
Glioblastoma Multiforme	C1621958	HOXB7	3217	P09629	homeobox B7	Transcription factor	93	0.57	0.615	0.00028382	0.02		1	2	0	1992	2007
Glioblastoma Multiforme	C1621958	HOXB8	3218	P17481	homeobox B8		46	0.636	0.538	0.84752	0.02		1	2	0	1992	2019
Glioblastoma Multiforme	C1621958	HOXC6	3223	P09630	homeobox C6	Transcription factor	80	0.595	0.692	0.51165	0.02		1	2	0	2018	2019
Glioblastoma Multiforme	C1621958	HOXC10	3226	Q9NYD6	homeobox C10		43	0.641	0.5	0.17368	0.02		1	2	0	2018	2019
Glioblastoma Multiforme	C1621958	HP	3240	P00738	haptoglobin	Enzyme	464	0.412	0.885	1.736e-05	0.02		1	2	0	2001	2010
Glioblastoma Multiforme	C1621958	HPGD	3248	P15428	15-hydroxyprostaglandin dehydrogenase		194	0.516	0.731	1.4357e-05	0.02		1	2	0	2011	2018
Glioblastoma Multiforme	C1621958	HPR	3250	P00739	haptoglobin-related protein	Enzyme	94	0.578	0.615	5.4618e-10	0.02		1	2	0	2008	2010
Glioblastoma Multiforme	C1621958	HRAS	3265	P01112	HRas proto-oncogene, GTPase	Enzyme modulator	698	0.378	0.885	0.079774	0.02		1	2	0	1987	2015
Glioblastoma Multiforme	C1621958	PRMT1	3276	Q99873	protein arginine methyltransferase 1	Epigenetic regulator	110	0.552	0.808	0.99907	0.02		1	2	0	2014	2019
Glioblastoma Multiforme	C1621958	HTR7	3363	P34969	5-hydroxytryptamine receptor 7	G-protein coupled receptor	103	0.592	0.5	0.045409	0.02		1	2	0	2004	2018
Glioblastoma Multiforme	C1621958	IAPP	3375	P10997	islet amyloid polypeptide	Signaling	183	0.507	0.808	0.0031814	0.02		1	2	0	2013	2018
Glioblastoma Multiforme	C1621958	MGR3	337892		Migraine, familial, with or without aura, susceptibility to		4	0.861	0.038		0.02		1	2	0	1997	2004
Glioblastoma Multiforme	C1621958	MRPL58	3396	Q14197	mitochondrial ribosomal protein L58		26	0.691	0.308	5.6196e-06	0.02		1	2	0	2018	2018
Glioblastoma Multiforme	C1621958	ID1	3397	P41134	inhibitor of DNA binding 1, HLH protein	Transcription factor	125	0.544	0.692	0.00031026	0.02		1	2	0	2018	2019
Glioblastoma Multiforme	C1621958	ID2	3398	Q02363	inhibitor of DNA binding 2	Transcription factor	92	0.572	0.731	0.66939	0.02		1	2	0	2015	2017
Glioblastoma Multiforme	C1621958	ID4	3400	P47928	inhibitor of DNA binding 4, HLH protein	Transcription factor	86	0.59	0.615	0.031243	0.02		1	2	0	2013	2017
Glioblastoma Multiforme	C1621958	ACTBL2	345651	Q562R1	actin beta like 2		134	0.539	0.769	5.8166e-16	0.02		1	2	0	2015	2017
Glioblastoma Multiforme	C1621958	IGF2	3481	P01344	insulin like growth factor 2		604	0.39	0.885	0.044127	0.02		1	2	0	1988	2011
Glioblastoma Multiforme	C1621958	IGFBP4	3487	P22692	insulin like growth factor binding protein 4	Enzyme modulator	94	0.572	0.731	0.023057	0.02		1	2	0	2006	2014
Glioblastoma Multiforme	C1621958	RBPJ	3516	Q06330	recombination signal binding protein for immunoglobulin kappa J region	Nucleic acid binding	161	0.518	0.808	0.99853	0.02		1	2	0	2013	2017
Glioblastoma Multiforme	C1621958	AQP1	358	P29972	aquaporin 1 (Colton blood group)	Ion channel	268	0.467	0.885	2.5697e-07	0.02		1	2	0	2013	2018
Glioblastoma Multiforme	C1621958	IL13RA1	3597	P78552	interleukin 13 receptor subunit alpha 1	Signaling	39	0.659	0.577	0.96333	0.02		0.5	2	0	1999	2018
Glioblastoma Multiforme	C1621958	IL15	3600	P40933	interleukin 15		426	0.422	0.846	0.70859	0.02		1	2	0	1999	2018
Glioblastoma Multiforme	C1621958	IRF3	3661	Q14653	interferon regulatory factor 3	Transcription factor	174	0.517	0.808	0.00011576	0.02		1	2	0	2017	2017
Glioblastoma Multiforme	C1621958	IRF7	3665	Q92985	interferon regulatory factor 7	Transcription factor	121	0.547	0.846	4.4508e-15	0.02		1	2	0	2015	2017
Glioblastoma Multiforme	C1621958	ISG20	3669	Q96AZ6	interferon stimulated exonuclease gene 20		414	0.414	0.846	0.002899	0.02		1	2	0	2010	2017
Glioblastoma Multiforme	C1621958	ITGA2	3673	P17301	integrin subunit alpha 2		166	0.522	0.731	6.2805e-11	0.02		1	2	0	2019	2019
Glioblastoma Multiforme	C1621958	ITGA7	3679	Q13683	integrin subunit alpha 7		111	0.588	0.654	4.2657e-17	0.02		1	2	0	2017	2019
Glioblastoma Multiforme	C1621958	ITGB1	3688	P05556	integrin subunit beta 1	Receptor	210	0.496	0.808	0.98208	0.02		1	2	0	2017	2019
Glioblastoma Multiforme	C1621958	ITGB4	3691	P16144	integrin subunit beta 4	Receptor	171	0.525	0.731	9.5287e-19	0.02		1	2	0	2012	2013
Glioblastoma Multiforme	C1621958	KPNB1	3837	Q14974	karyopherin subunit beta 1	Transporter	38	0.691	0.385	1	0.02		1	2	0	2018	2019
Glioblastoma Multiforme	C1621958	ARG2	384	P78540	arginase 2	Enzyme	103	0.569	0.731	0.00018207	0.02		1	2	0	2016	2017
Glioblastoma Multiforme	C1621958	RHOA	387	P61586	ras homolog family member A	Enzyme modulator	193	0.502	0.808	0.60405	0.02		1	2	0	2019	2019
Glioblastoma Multiforme	C1621958	LAG3	3902	P18627	lymphocyte activating 3	Receptor	154	0.517	0.692	0.27623	0.02		1	2	0	2018	2019
Glioblastoma Multiforme	C1621958	STMN1	3925	P16949	stathmin 1		284	0.458	0.885	0.075244	0.02		1	2	0	2018	2018
Glioblastoma Multiforme	C1621958	LCN2	3934	P80188	lipocalin 2	Enzyme	497	0.405	0.885	1.1404e-09	0.02		1	2	0	2009	2019
Glioblastoma Multiforme	C1621958	LDHA	3939	P00338	lactate dehydrogenase A	Enzyme	185	0.507	0.808	0.069173	0.02		0.5	2	0	2017	2018
Glioblastoma Multiforme	C1621958	LEPR	3953	P48357	leptin receptor	Signaling	416	0.433	0.808	0.99475	0.02		1	2	0	2013	2017
Glioblastoma Multiforme	C1621958	LIF	3976	P15018	LIF interleukin 6 family cytokine	Signaling	236	0.483	0.769	0.5242	0.02		1	2	0	2009	2020
Glioblastoma Multiforme	C1621958	LRP1	4035	Q07954	LDL receptor related protein 1		252	0.482	0.769	1	0.02		1	2	0	2017	2018
Glioblastoma Multiforme	C1621958	LYN	4067	P07948	LYN proto-oncogene, Src family tyrosine kinase	Kinase	75	0.603	0.615	0.99886	0.02		0.5	2	0	2005	2015
Glioblastoma Multiforme	C1621958	MIRLET7B	406884		microRNA let-7b		186	0.493	0.769		0.02		1	2	0	2013	2018
Glioblastoma Multiforme	C1621958	MIRLET7D	406886		microRNA let-7d		82	0.579	0.692		0.02		1	2	0	2015	2016
Glioblastoma Multiforme	C1621958	MIR122	406906		microRNA 122		250	0.468	0.808		0.02		1	2	0	2017	2018
Glioblastoma Multiforme	C1621958	MIR127	406914		microRNA 127		105	0.553	0.692		0.02		1	2	0	2014	2014
Glioblastoma Multiforme	C1621958	MIR130A	406919		microRNA 130a		141	0.522	0.808		0.02		1	2	0	2013	2015
Glioblastoma Multiforme	C1621958	MIR132	406921		microRNA 132		222	0.485	0.846		0.02		1	2	0	2017	2017
Glioblastoma Multiforme	C1621958	MIR152	406943		microRNA 152		136	0.521	0.769		0.02		1	2	0	2014	2019
Glioblastoma Multiforme	C1621958	MIR17	406952		microRNA 17		270	0.459	0.846		0.02		1	2	0	2012	2013
Glioblastoma Multiforme	C1621958	MIR185	406961		microRNA 185		106	0.551	0.808		0.02		1	2	0	2018	2019
Glioblastoma Multiforme	C1621958	MIR190A	406965		microRNA 190a		44	0.65	0.423		0.02		1	2	0	2012	2019
Glioblastoma Multiforme	C1621958	MIR191	406966		microRNA 191		112	0.548	0.731		0.02		1	2	0	2017	2019
Glioblastoma Multiforme	C1621958	MIR20A	406982		microRNA 20a		180	0.498	0.769		0.02		1	2	0	2015	2015
Glioblastoma Multiforme	C1621958	MIR200C	406985		microRNA 200c		202	0.486	0.846		0.02		1	2	0	2016	2018
Glioblastoma Multiforme	C1621958	MIR204	406987		microRNA 204		203	0.487	0.808		0.02		1	2	0	2018	2018
Glioblastoma Multiforme	C1621958	MIR211	406993		microRNA 211		106	0.552	0.577		0.02		1	2	0	2012	2017
Glioblastoma Multiforme	C1621958	MIR23A	407010		microRNA 23a		174	0.499	0.808		0.02		1	2	0	2010	2018
Glioblastoma Multiforme	C1621958	MIR29C	407026		microRNA 29c		183	0.496	0.808		0.02		1	2	0	2013	2015
Glioblastoma Multiforme	C1621958	MIR30A	407029		microRNA 30a		218	0.478	0.808		0.02		1	2	0	2013	2018
Glioblastoma Multiforme	C1621958	MIR30B	407030		microRNA 30b		109	0.555	0.808		0.02		1	2	0	2013	2018
Glioblastoma Multiforme	C1621958	MIR34C	407042		microRNA 34c		131	0.541	0.885		0.02		1	2	0	2017	2019
Glioblastoma Multiforme	C1621958	MIR96	407053		microRNA 96		134	0.536	0.769		0.02		1	2	0	2018	2018
Glioblastoma Multiforme	C1621958	MIR99A	407055		microRNA 99a		122	0.536	0.808		0.02		1	2	0	2013	2013
Glioblastoma Multiforme	C1621958	ASIC1	41	P78348	acid sensing ion channel subunit 1	Ion channel	52	0.653	0.615	0.93017	0.02		0.5	2	0	2009	2013
Glioblastoma Multiforme	C1621958	ARSA	410	P15289	arylsulfatase A	Enzyme	376	0.448	0.923	1.0893e-11	0.02		1	2	0	2018	2019
Glioblastoma Multiforme	C1621958	MAGEA1	4100	P43355	MAGE family member A1	Cell adhesion	71	0.601	0.462		0.02		1	2	0	2004	2012
Glioblastoma Multiforme	C1621958	PIM3	415116	Q86V86	Pim-3 proto-oncogene, serine/threonine kinase		62	0.621	0.654	0.98192	0.02		1	2	0	2012	2015
Glioblastoma Multiforme	C1621958	MC4R	4160	P32245	melanocortin 4 receptor	G-protein coupled receptor	149	0.535	0.692	0.00091697	0.02		1	2	0	2018	2018
Glioblastoma Multiforme	C1621958	CD46	4179	P15529	CD46 molecule		258	0.477	0.808	4.7013e-07	0.02		1	2	0	1994	2016
Glioblastoma Multiforme	C1621958	ME1	4199	P48163	malic enzyme 1	Enzyme	58	0.628	0.615	8.2005e-14	0.02		1	2	0	2011	2018
Glioblastoma Multiforme	C1621958	MEFV	4210	O15553	MEFV innate immuity regulator, pyrin		410	0.44	0.885	1.0177e-14	0.02		1	2	0	2012	2017
Glioblastoma Multiforme	C1621958	MGP	4256	P08493	matrix Gla protein		160	0.539	0.846	3.6072e-05	0.02		1	2	0	2009	2013
Glioblastoma Multiforme	C1621958	KMT2A	4297	Q03164	lysine methyltransferase 2A		535	0.41	0.885	1	0.02		1	2	0	2012	2017
Glioblastoma Multiforme	C1621958	CD200	4345	P41217	CD200 molecule		149	0.529	0.769	0.41359	0.02		1	2	0	2016	2019
Glioblastoma Multiforme	C1621958	MPG	4350	P29372	N-methylpurine DNA glycosylase	Enzyme	74	0.597	0.731	1.9454e-12	0.02		1	2	0	2011	2018
Glioblastoma Multiforme	C1621958	MPL	4352	P40238	MPL proto-oncogene, thrombopoietin receptor	Receptor	222	0.51	0.692	4.0719e-09	0.02		1	2	0	2012	2019
Glioblastoma Multiforme	C1621958	POTEKP	440915	Q9BYX7	POTE ankyrin domain family member K, pseudogene		131	0.542	0.769		0.02		1	2	0	2015	2017
Glioblastoma Multiforme	C1621958	MIR328	442901		microRNA 328		99	0.558	0.769		0.02		1	2	0	2010	2012
Glioblastoma Multiforme	C1621958	MIR339	442907		microRNA 339		61	0.608	0.615		0.02		1	2	0	2018	2020
Glioblastoma Multiforme	C1621958	MIR373	442918		microRNA 373		97	0.556	0.692		0.02		1	2	0	2016	2018
Glioblastoma Multiforme	C1621958	NUDT1	4521	P36639	nudix hydrolase 1	Enzyme	73	0.597	0.769	7.4464e-12	0.02		1	2	0	2017	2018
Glioblastoma Multiforme	C1621958	MYT1	4661	Q01538	myelin transcription factor 1	Transcription factor	28	0.722	0.423	0.97791	0.02		1	2	0	2018	2018
Glioblastoma Multiforme	C1621958	NAP1L1	4673	P55209	nucleosome assembly protein 1 like 1	Enzyme modulator	53	0.647	0.692	0.99941	0.02		1	2	0	2000	2004
Glioblastoma Multiforme	C1621958	NBN	4683	O60934	nibrin	Nucleic acid binding	291	0.467	0.808	2.1838e-16	0.02		1	2	0	2010	2011
Glioblastoma Multiforme	C1621958	NEDD8	4738	Q15843	NEDD8 ubiquitin like modifier	Nucleic acid binding	88	0.576	0.692	0.84938	0.02		1	2	0	2019	2019
Glioblastoma Multiforme	C1621958	NELL1	4745	Q92832	neural EGFL like 1	Calcium-binding protein	122	0.539	0.731	8.6694e-12	0.02		1	2	0	2001	2018
Glioblastoma Multiforme	C1621958	NEO1	4756	Q92859	neogenin 1		60	0.623	0.692	0.24398	0.02		1	2	0	1997	2014
Glioblastoma Multiforme	C1621958	NFATC1	4772	O95644	nuclear factor of activated T cells 1	Transcription factor	161	0.517	0.731	0.15652	0.02		1	2	0	2015	2020
Glioblastoma Multiforme	C1621958	NFIA	4774	Q12857	nuclear factor I A	Nucleic acid binding	95	0.599	0.808	0.99959	0.02		1	2	0	2017	2020
Glioblastoma Multiforme	C1621958	NGF	4803	P01138	nerve growth factor	Signaling	616	0.391	0.885	0.82026	0.02		1	2	0	1999	2011
Glioblastoma Multiforme	C1621958	NGFR	4804	P08138	nerve growth factor receptor	Receptor	256	0.477	0.846	0.097889	0.02		1	2	0	1999	2019
Glioblastoma Multiforme	C1621958	ATP1B2	482	P14415	ATPase Na+/K+ transporting subunit beta 2	Transporter	28	0.705	0.308	0.073684	0.02		1	2	0	2017	2019
Glioblastoma Multiforme	C1621958	NNMT	4837	P40261	nicotinamide N-methyltransferase	Enzyme	103	0.559	0.654	5.2791e-08	0.02		1	2	0	2001	2017
Glioblastoma Multiforme	C1621958	NOS1	4842	P29475	nitric oxide synthase 1		521	0.408	0.885	1	0.02		1	2	0	1994	2018
Glioblastoma Multiforme	C1621958	YBX1	4904	P67809	Y-box binding protein 1		148	0.519	0.769	0.94646	0.02		1	2	0	2009	2019
Glioblastoma Multiforme	C1621958	MIR376A1	494325		microRNA 376a-1		25	0.7	0.346		0.02		1	2	0	2012	2018
Glioblastoma Multiforme	C1621958	MIR378A	494327		microRNA 378a		127	0.532	0.808		0.02		1	2	0	2017	2018
Glioblastoma Multiforme	C1621958	MIR425	494337		microRNA 425		78	0.581	0.654		0.02		1	2	0	2008	2014
Glioblastoma Multiforme	C1621958	P2RX7	5027	Q99572	purinergic receptor P2X 7	Ion channel	337	0.45	0.808	3.3344e-11	0.02		1	2	0	2018	2019
Glioblastoma Multiforme	C1621958	SMARCAL1	50485	Q9NZC9	SWI/SNF related, matrix associated, actin dependent regulator of chromatin, subfamily a like 1		109	0.599	0.654	2.2554e-06	0.02		1	2	0	2011	2018
Glioblastoma Multiforme	C1621958	G0S2	50486	P27469	G0/G1 switch 2		47	0.656	0.423	0.37788	0.02		1	2	0	2018	2019
Glioblastoma Multiforme	C1621958	PRDX1	5052	Q06830	peroxiredoxin 1	Enzyme	237	0.485	0.846	7.6959e-10	0.02		1	2	0	2013	2018
Glioblastoma Multiforme	C1621958	PAX5	5079	Q02548	paired box 5		199	0.487	0.654	0.99798	0.02		1	2	0	1995	2018
Glioblastoma Multiforme	C1621958	PBX3	5090	P40426	PBX homeobox 3	Transcription factor	60	0.619	0.5	0.36301	0.02		1	2	0	2017	2018
Glioblastoma Multiforme	C1621958	RMDN1	51115	Q96DB5	regulator of microtubule dynamics 1		123	0.546	0.769	5.8995e-10	0.02		1	2	0	2008	2018
Glioblastoma Multiforme	C1621958	ING4	51147	Q9UNL4	inhibitor of growth family member 4	Nucleic acid binding	92	0.573	0.577	0.029013	0.02		1	2	0	2004	2007
Glioblastoma Multiforme	C1621958	EGFL7	51162	Q9UHF1	EGF like domain multiple 7	Calcium-binding protein	68	0.612	0.577	5.5498e-18	0.02		1	2	0	2017	2017
Glioblastoma Multiforme	C1621958	DCTN4	51164	Q9UJW0	dynactin subunit 4		253	0.472	0.846	0.73221	0.02		1	2	0	2013	2019
Glioblastoma Multiforme	C1621958	NUSAP1	51203	Q9BXS6	nucleolar and spindle associated protein 1		55	0.623	0.346	0.045674	0.02		1	2	0	2018	2018
Glioblastoma Multiforme	C1621958	PDE1C	5137	Q14123	phosphodiesterase 1C		41	0.7	0.423	5.3913e-09	0.02		1	2	0	2007	2016
Glioblastoma Multiforme	C1621958	CRLF3	51379	Q8IUI8	cytokine receptor like factor 3		23	0.729	0.346	0.00047973	0.02		1	2	0	2010	2015
Glioblastoma Multiforme	C1621958	AMOTL2	51421	Q9Y2J4	angiomotin like 2		12	0.792	0.077	0.15515	0.02		1	2	0	2015	2019
Glioblastoma Multiforme	C1621958	DCDC2	51473	Q9UHG0	doublecortin domain containing 2		128	0.546	0.769	5.6611e-10	0.02		1	2	0	2002	2018
Glioblastoma Multiforme	C1621958	PDGFA	5154	P04085	platelet derived growth factor subunit A	Signaling	135	0.533	0.731	0.80842	0.02		1	2	1	1988	2019
Glioblastoma Multiforme	C1621958	SIRT6	51548	Q8N6T7	sirtuin 6	Epigenetic regulator	195	0.496	0.846	0.039119	0.02		1	2	0	2016	2019
Glioblastoma Multiforme	C1621958	INPP5K	51763	Q9BT40	inositol polyphosphate-5-phosphatase K	Enzyme	103	0.587	0.654	4.2264e-05	0.02		1	2	0	2015	2019
Glioblastoma Multiforme	C1621958	PFKM	5213	P08237	phosphofructokinase, muscle	Kinase	58	0.666	0.5	3.7625e-18	0.02		1	2	0	2015	2017
Glioblastoma Multiforme	C1621958	ABCB4	5244	P21439	ATP binding cassette subfamily B member 4	Transporter	157	0.529	0.615	2.2138e-07	0.02		1	2	0	2010	2014
Glioblastoma Multiforme	C1621958	PHB	5245	P35232	prohibitin		177	0.511	0.846	0.7588	0.02		1	2	0	2018	2019
Glioblastoma Multiforme	C1621958	SLC25A3	5250	Q00325	solute carrier family 25 member 3	Transporter	112	0.566	0.692	0.074834	0.02		1	2	0	2012	2018
Glioblastoma Multiforme	C1621958	SERPINA1	5265	P01009	serpin family A member 1	Enzyme modulator	482	0.41	0.923	6.8497e-08	0.02		1	2	0	2017	2018
Glioblastoma Multiforme	C1621958	PKD1	5310	P98161	polycystin 1, transient receptor potential channel interacting		217	0.493	0.769	1	0.02		1	2	0	2011	2019
Glioblastoma Multiforme	C1621958	SHC3	53358	Q92529	SHC adaptor protein 3	Signaling	72	0.587	0.731	0.046457	0.02		1	2	0	2005	2014
Glioblastoma Multiforme	C1621958	PLEK	5341	P08567	pleckstrin	Cellular structure	83	0.588	0.731	0.001067	0.02		1	2	0	2006	2011
Glioblastoma Multiforme	C1621958	ATP7B	540	P35670	ATPase copper transporting beta	Transporter	182	0.529	0.654	4.8001e-30	0.02		1	2	1	2014	2017
Glioblastoma Multiforme	C1621958	PODXL	5420	O00592	podocalyxin like		156	0.551	0.731	0.0010333	0.02		0.5	2	0	2014	2015
Glioblastoma Multiforme	C1621958	ERRFI1	54206	Q9UJM3	ERBB receptor feedback inhibitor 1		71	0.612	0.538	0.012152	0.02		1	2	0	2010	2014
Glioblastoma Multiforme	C1621958	NLGN3	54413	Q9NZ94	neuroligin 3		63	0.653	0.462	0.97641	0.02		1	2	0	2017	2018
Glioblastoma Multiforme	C1621958	PPIA	5478	P62937	peptidylprolyl isomerase A		180	0.51	0.769	0.55734	0.02		0.5	2	0	2011	2018
Glioblastoma Multiforme	C1621958	ELOVL2	54898	Q9NXB9	ELOVL fatty acid elongase 2	Enzyme	26	0.722	0.423	8.3719e-10	0.02		1	2	0	2019	2019
Glioblastoma Multiforme	C1621958	MKS1	54903	Q9NXB0	MKS transition zone complex subunit 1	Extracellular structure	231	0.505	0.769	3.3768e-16	0.02		1	2	0	2011	2018
Glioblastoma Multiforme	C1621958	CEP55	55165	Q53EZ4	centrosomal protein 55		134	0.534	0.731	1.964e-12	0.02		1	2	0	2018	2019
Glioblastoma Multiforme	C1621958	NEIL3	55247	Q8TAT5	nei like DNA glycosylase 3	Enzyme	21	0.729	0.462	1.522e-09	0.02		1	2	1	2013	2017
Glioblastoma Multiforme	C1621958	DRAM1	55332	Q8N682	DNA damage regulated autophagy modulator 1		37	0.678	0.385	0.22771	0.02		1	2	0	2013	2018
Glioblastoma Multiforme	C1621958	MEG3	55384		maternally expressed 3		239	0.471	0.846		0.02		1	2	0	2016	2018
Glioblastoma Multiforme	C1621958	SAGE1	55511	Q9NXZ1	sarcoma antigen 1	Enzyme	78	0.588	0.654	8.5732e-18	0.02		1	2	0	2013	2019
Glioblastoma Multiforme	C1621958	SRGN	5552	P10124	serglycin		84	0.588	0.731	0.69656	0.02		1	2	0	2017	2020
Glioblastoma Multiforme	C1621958	POMGNT1	55624	Q8WZA1	protein O-linked mannose N-acetylglucosaminyltransferase 1 (beta 1,2-)		188	0.537	0.538	1.9454e-20	0.02		1	2	0	2017	2019
Glioblastoma Multiforme	C1621958	CHD7	55636	Q9P2D1	chromodomain helicase DNA binding protein 7		419	0.441	0.846	1	0.02		1	2	0	2019	2019
Glioblastoma Multiforme	C1621958	SYBU	55638	Q9NX95	syntabulin	Transporter	120	0.546	0.769	9.7732e-05	0.02		1	2	0	2008	2018
Glioblastoma Multiforme	C1621958	NLRP2	55655	Q9NX02	NLR family pyrin domain containing 2		155	0.515	0.731	1.4201e-38	0.02		1	2	0	2010	2011
Glioblastoma Multiforme	C1621958	HIF1AN	55662	Q9NWT6	hypoxia inducible factor 1 subunit alpha inhibitor		38	0.656	0.462	0.073885	0.02		1	2	0	2014	2019
Glioblastoma Multiforme	C1621958	VPS11	55823	Q9H270	VPS11 core subunit of CORVET and HOPS complexes	Transporter	79	0.633	0.654	1.8905e-05	0.02		1	2	0	2014	2019
Glioblastoma Multiforme	C1621958	PRKD1	5587	Q15139	protein kinase D1	Kinase	171	0.531	0.846	6.6485e-07	0.02		1	2	0	2011	2013
Glioblastoma Multiforme	C1621958	MAPK9	5601	P45984	mitogen-activated protein kinase 9	Kinase	115	0.561	0.731	0.069738	0.02		1	2	0	1997	2015
Glioblastoma Multiforme	C1621958	MAP2K1	5604	Q02750	mitogen-activated protein kinase kinase 1	Kinase	389	0.439	0.846	0.89669	0.02		1	2	0	2012	2016
Glioblastoma Multiforme	C1621958	MAP2K6	5608	P52564	mitogen-activated protein kinase kinase 6	Kinase	59	0.631	0.615	0.91334	0.02		1	2	0	2011	2018
Glioblastoma Multiforme	C1621958	EIF2AK2	5610	P19525	eukaryotic translation initiation factor 2 alpha kinase 2	Kinase	142	0.538	0.769	0.017643	0.02		1	2	0	2005	2018
Glioblastoma Multiforme	C1621958	PROS1	5627	P07225	protein S		283	0.467	0.846	0.00047089	0.02		1	2	0	2016	2018
Glioblastoma Multiforme	C1621958	KLK6	5653	Q92876	kallikrein related peptidase 6	Enzyme	99	0.575	0.654	0.0060052	0.02		1	2	0	2013	2013
Glioblastoma Multiforme	C1621958	DIABLO	56616	Q9NR28	diablo IAP-binding mitochondrial protein		108	0.555	0.692	2.5722e-06	0.02		1	2	0	2015	2017
Glioblastoma Multiforme	C1621958	SLC2A4RG	56731	Q9NR83	SLC2A4 regulator	Transcription factor	66	0.615	0.692	0.21856	0.02		1	2	1	2016	2017
Glioblastoma Multiforme	C1621958	RAD18	56852	Q9NS91	RAD18 E3 ubiquitin protein ligase		38	0.691	0.346	1.5787e-08	0.02		1	2	0	2014	2019
Glioblastoma Multiforme	C1621958	CHPT1	56994	Q8WUD6	choline phosphotransferase 1	Enzyme	253	0.474	0.846	0.00024252	0.02		1	2	0	2019	2019
Glioblastoma Multiforme	C1621958	PDXP	57026	Q96GD0	pyridoxal phosphatase	Enzyme	149	0.533	0.731	0.25559	0.02		1	2	0	2016	2018
Glioblastoma Multiforme	C1621958	SALL4	57167	Q9UJQ4	spalt like transcription factor 4	Transcription factor	245	0.489	0.769	0.99997	0.02		0.5	2	0	2015	2017
Glioblastoma Multiforme	C1621958	PTCH1	5727	Q13635	patched 1		604	0.398	0.885	1	0.02		1	2	0	2015	2018
Glioblastoma Multiforme	C1621958	MIR20B	574032		microRNA 20b		84	0.581	0.615		0.02		1	2	0	2016	2019
Glioblastoma Multiforme	C1621958	MIR431	574038		microRNA 431		53	0.621	0.577		0.02		1	2	0	2014	2019
Glioblastoma Multiforme	C1621958	MIR491	574444		microRNA 491		58	0.619	0.577		0.02		1	2	0	2015	2016
Glioblastoma Multiforme	C1621958	MIR524	574478		microRNA 524		23	0.722	0.231		0.02		1	2	0	2013	2017
Glioblastoma Multiforme	C1621958	MIR503	574506		microRNA 503		111	0.551	0.808		0.02		1	2	0	2014	2017
Glioblastoma Multiforme	C1621958	MIR504	574507		microRNA 504		38	0.67	0.462		0.02		1	2	0	2019	2019
Glioblastoma Multiforme	C1621958	PREX1	57580	Q8TCU6	phosphatidylinositol-3,4,5-trisphosphate dependent Rac exchange factor 1	Enzyme modulator	52	0.644	0.615	1	0.02		1	2	0	2017	2018
Glioblastoma Multiforme	C1621958	ARHGAP21	57584	Q5T5U3	Rho GTPase activating protein 21		21	0.722	0.308	1	0.02		1	2	0	2009	2013
Glioblastoma Multiforme	C1621958	CIP2A	57650	Q8TCG1	cellular inhibitor of PP2A		141	0.524	0.808	1.3591e-13	0.02		1	2	0	2017	2018
Glioblastoma Multiforme	C1621958	SUGP1	57794	Q8IWZ8	SURP and G-patch domain containing 1	Nucleic acid binding	72	0.623	0.615	0.99568	0.02		1	2	0	2012	2013
Glioblastoma Multiforme	C1621958	PTPN12	5782	Q05209	protein tyrosine phosphatase non-receptor type 12		48	0.641	0.769	0.99996	0.02		1	2	0	2011	2018
Glioblastoma Multiforme	C1621958	NECTIN1	5818	Q15223	nectin cell adhesion molecule 1		196	0.523	0.808	0.061154	0.02		1	2	0	2013	2017
Glioblastoma Multiforme	C1621958	CXCL16	58191	Q9H2A7	C-X-C motif chemokine ligand 16	Signaling	178	0.502	0.769	3.4546e-05	0.02		1	2	0	2017	2018
Glioblastoma Multiforme	C1621958	RAC3	5881	P60763	Rac family small GTPase 3	Enzyme modulator	44	0.682	0.423	0.0026125	0.02		1	2	0	2005	2017
Glioblastoma Multiforme	C1621958	RANBP2	5903	P49792	RAN binding protein 2	Enzyme modulator	110	0.578	0.615	1	0.02		1	2	0	2004	2007
Glioblastoma Multiforme	C1621958	RAP1B	5908	P61224	RAP1B, member of RAS oncogene family	Enzyme modulator	116	0.565	0.769	0.90995	0.02		1	2	0	2014	2014
Glioblastoma Multiforme	C1621958	PLAAT4	5920	Q9UL19	phospholipase A and acyltransferase 4		190	0.5	0.808	1.2234e-07	0.02		1	2	0	2013	2017
Glioblastoma Multiforme	C1621958	RB1	5925	P06400	RB transcriptional corepressor 1	Nucleic acid binding	339	0.444	0.885	1	0.02		1	2	0	2016	2018
Glioblastoma Multiforme	C1621958	KDM5A	5927	P29375	lysine demethylase 5A		69	0.597	0.731	1	0.02		1	2	0	2015	2017
Glioblastoma Multiforme	C1621958	RECQL	5965	P46063	RecQ like helicase	Enzyme	58	0.615	0.615	1.5345e-20	0.02		1	2	0	2011	2017
Glioblastoma Multiforme	C1621958	REG1A	5967	P05451	regenerating family member 1 alpha		264	0.467	0.846	1.3499e-05	0.02		1	2	0	2012	2018
Glioblastoma Multiforme	C1621958	TRIM27	5987	P14373	tripartite motif containing 27		90	0.572	0.808	0.99685	0.02		1	2	0	2019	2019
Glioblastoma Multiforme	C1621958	RFX1	5989	P22670	regulatory factor X1	Transcription factor	47	0.636	0.538	0.99724	0.02		1	2	0	2010	2014
Glioblastoma Multiforme	C1621958	MIIP	60672	Q5JXC2	migration and invasion inhibitory protein		29	0.7	0.308	1.3121e-20	0.02		1	2	0	2003	2010
Glioblastoma Multiforme	C1621958	SNORD15A	6079		small nucleolar RNA, C/D box 15A		41	0.653	0.577		0.02		1	2	0	2015	2017
Glioblastoma Multiforme	C1621958	MIR486-1	619554		microRNA 486-1		142	0.521	0.808		0.02		1	2	0	2008	2011
Glioblastoma Multiforme	C1621958	RPS6KB1	6198	P23443	ribosomal protein S6 kinase B1	Kinase	169	0.511	0.731	0.97285	0.02		1	2	0	2005	2017
Glioblastoma Multiforme	C1621958	RPS15A	6210	P62244	ribosomal protein S15a	Nucleic acid binding	58	0.638	0.538	0.802	0.02		1	2	0	2016	2016
Glioblastoma Multiforme	C1621958	RRAD	6236	P55042	RRAD, Ras related glycolysis inhibitor and calcium channel regulator		58	0.638	0.538	0.43879	0.02		1	2	0	2014	2016
Glioblastoma Multiforme	C1621958	RSU1	6251	Q15404	Ras suppressor protein 1		27	0.716	0.308	0.00089071	0.02		1	2	0	1995	2002
Glioblastoma Multiforme	C1621958	S100A9	6280	P06702	S100 calcium binding protein A9	Calcium-binding protein	363	0.433	0.885	0.4777	0.02		1	2	0	2018	2019
Glioblastoma Multiforme	C1621958	S100A11	6282	P31949	S100 calcium binding protein A11	Calcium-binding protein	103	0.556	0.731	0.0084662	0.02		1	2	0	1999	2019
Glioblastoma Multiforme	C1621958	SAA1	6288	P0DJI8	serum amyloid A1	Transporter	188	0.513	0.808	0.01493	0.02		0.5	2	0	2017	2018
Glioblastoma Multiforme	C1621958	SAT1	6303	P21673	spermidine/spermine N1-acetyltransferase 1		135	0.539	0.808	0.8706	0.02		1	2	0	2012	2014
Glioblastoma Multiforme	C1621958	CCL3	6348	P10147	C-C motif chemokine ligand 3	Signaling	282	0.46	0.885	0.34981	0.02		1	2	0	2012	2015
Glioblastoma Multiforme	C1621958	CCL4	6351	P13236;Q8NHW4	C-C motif chemokine ligand 4	Signaling	276	0.466	0.923	0.24134	0.02		1	2	0	2013	2018
Glioblastoma Multiforme	C1621958	CCL8	6355	P80075	C-C motif chemokine ligand 8	Signaling	115	0.546	0.692	0.041412	0.02		1	2	0	2019	2020
Glioblastoma Multiforme	C1621958	CCL11	6356	P51671	C-C motif chemokine ligand 11	Signaling	250	0.473	0.885	0.010211	0.02		1	2	0	2016	2017
Glioblastoma Multiforme	C1621958	SDC1	6382	P18827	syndecan 1	Extracellular structure	323	0.445	0.769	0.0084118	0.02		1	2	0	2018	2019
Glioblastoma Multiforme	C1621958	ADGRL4	64123	Q9HBW9	adhesion G protein-coupled receptor L4	G-protein coupled receptor	25	0.76	0.192	2.78e-11	0.02		1	2	0	2015	2018
Glioblastoma Multiforme	C1621958	POTEM	641455	A6NI47	POTE ankyrin domain family member M		133	0.541	0.769	0.00031637	0.02		1	2	0	2015	2017
Glioblastoma Multiforme	C1621958	SFRP4	6424	Q6FHJ7	secreted frizzled related protein 4		155	0.524	0.654	9.2586e-05	0.02		1	2	0	2015	2018
Glioblastoma Multiforme	C1621958	SRSF1	6426	Q07955	serine and arginine rich splicing factor 1	Nucleic acid binding	98	0.563	0.692	0.98268	0.02		1	2	0	2018	2019
Glioblastoma Multiforme	C1621958	HHIP	64399	Q96QV1	hedgehog interacting protein		122	0.55	0.654	0.95436	0.02		1	2	0	2015	2017
Glioblastoma Multiforme	C1621958	SGTA	6449	O43765	small glutamine rich tetratricopeptide repeat containing alpha		43	0.65	0.5	0.94632	0.02		1	2	0	2015	2019
Glioblastoma Multiforme	C1621958	CPEB1	64506	Q9BZB8	cytoplasmic polyadenylation element binding protein 1	Nucleic acid binding	57	0.638	0.538	0.99899	0.02		1	2	0	2013	2018
Glioblastoma Multiforme	C1621958	SHC1	6464	P29353	SHC adaptor protein 1	Signaling	80	0.597	0.538	0.0017351	0.02		1	2	0	1999	2005
Glioblastoma Multiforme	C1621958	SIAH1	6477	Q8IUQ4	siah E3 ubiquitin protein ligase 1		54	0.631	0.538	0.69866	0.02		1	2	0	2018	2019
Glioblastoma Multiforme	C1621958	NDRG4	65009	Q9ULP0	NDRG family member 4	Enzyme	36	0.67	0.462	0.011627	0.02		0.5	2	0	2012	2016
Glioblastoma Multiforme	C1621958	RTN4R	65078	Q9BZR6	reticulon 4 receptor		75	0.595	0.692	0.95882	0.02		1	2	0	2018	2019
Glioblastoma Multiforme	C1621958	MARCKSL1	65108	P49006	MARCKS like 1		169	0.508	0.731	0.014253	0.02		1	2	0	2008	2008
Glioblastoma Multiforme	C1621958	SLC3A2	6520	P08195	solute carrier family 3 member 2	Transporter	108	0.565	0.731	4.2163e-08	0.02		1	2	0	2015	2015
Glioblastoma Multiforme	C1621958	SLC5A5	6528	Q92911	solute carrier family 5 member 5	Transporter	195	0.499	0.769	0.0029492	0.02		1	2	0	2002	2018
Glioblastoma Multiforme	C1621958	UCA1	652995		urothelial cancer associated 1		152	0.512	0.808		0.02		1	2	0	2017	2019
Glioblastoma Multiforme	C1621958	H3P38	654505		H3 histone pseudogene 38		21	0.729	0.346		0.02		1	2	0	2010	2015
Glioblastoma Multiforme	C1621958	SLC9A1	6548	P19634	solute carrier family 9 member A1	Transporter	144	0.55	0.731	0.79049	0.02		1	2	0	2014	2018
Glioblastoma Multiforme	C1621958	SMARCA4	6597	P51532	SWI/SNF related, matrix associated, actin dependent regulator of chromatin, subfamily a, member 4	Epigenetic regulator	347	0.45	0.885	1	0.02		1	2	0	2013	2018
Glioblastoma Multiforme	C1621958	SMS	6611	P52788	spermine synthase		263	0.491	0.846	0.97297	0.02		1	2	0	2018	2019
Glioblastoma Multiforme	C1621958	SNCA	6622	P37840	synuclein alpha	Transporter	449	0.427	0.885	0.8829	0.02		1	2	1	2017	2019
Glioblastoma Multiforme	C1621958	FSCN1	6624	Q16658	fascin actin-bundling protein 1	Cellular structure	175	0.504	0.731	0.86852	0.02		1	2	0	1995	2018
Glioblastoma Multiforme	C1621958	SOX1	6656	O00570	SRY-box transcription factor 1	Transcription factor	55	0.617	0.692	0.62322	0.02		1	2	0	2011	2017
Glioblastoma Multiforme	C1621958	SOX3	6658	P41225	SRY-box transcription factor 3	Transcription factor	151	0.535	0.731	0.44948	0.02		1	2	0	2019	2019
Glioblastoma Multiforme	C1621958	DST	667	Q03001	dystonin	Cellular structure	147	0.552	0.846	1	0.02		1	2	0	2010	2018
Glioblastoma Multiforme	C1621958	SPAST	6683	Q9UBP0	spastin	Cellular structure	138	0.579	0.577	0.99939	0.02		1	2	0	2011	2015
Glioblastoma Multiforme	C1621958	SPINT1	6692	O43278	serine peptidase inhibitor, Kunitz type 1		96	0.57	0.577	1.0175e-05	0.02		1	2	0	2005	2007
Glioblastoma Multiforme	C1621958	SPOCK1	6695	Q08629	SPARC (osteonectin), cwcv and kazal like domains proteoglycan 1	Enzyme modulator	70	0.61	0.577	0.82592	0.02		1	2	0	2006	2016
Glioblastoma Multiforme	C1621958	ST14	6768	Q9Y5Y6	suppression of tumorigenicity 14	Enzyme	170	0.514	0.769	0.56042	0.02		1	2	0	2017	2018
Glioblastoma Multiforme	C1621958	SULT1A1	6817	P50225	sulfotransferase family 1A member 1		122	0.554	0.769	3.039e-11	0.02		1	2	0	2011	2019
Glioblastoma Multiforme	C1621958	BTC	685	P35070	betacellulin	Signaling	51	0.644	0.577	0.062276	0.02		1	2	0	2018	2019
Glioblastoma Multiforme	C1621958	TACC1	6867	O75410	transforming acidic coiled-coil containing protein 1		18	0.769	0.192	5.4901e-05	0.02		1	2	0	2012	2014
Glioblastoma Multiforme	C1621958	TAT	6898	P17735	tyrosine aminotransferase		230	0.492	0.846	0.0068998	0.02		1	2	0	2017	2019
Glioblastoma Multiforme	C1621958	HNF1A	6927	P20823	HNF1 homeobox A	Nucleic acid binding	292	0.478	0.846	0.96115	0.02		1	2	0	2012	2019
Glioblastoma Multiforme	C1621958	MIR574	693159		microRNA 574		71	0.599	0.577		0.02		1	2	0	2014	2018
Glioblastoma Multiforme	C1621958	TCF7	6932	P36402	transcription factor 7		108	0.556	0.654	0.0053732	0.02		1	2	0	2018	2019
Glioblastoma Multiforme	C1621958	MIR622	693207		microRNA 622		48	0.638	0.5		0.02		1	2	0	2016	2019
Glioblastoma Multiforme	C1621958	TRBV20OR9-2	6962		T cell receptor beta variable 20/OR9-2 (non-functional)		456	0.403	0.923		0.02		1	2	0	1995	2018
Glioblastoma Multiforme	C1621958	TDGF1	6997	P13385	teratocarcinoma-derived growth factor 1	Calcium-binding protein	95	0.584	0.731	9.1591e-11	0.02		1	2	0	2015	2018
Glioblastoma Multiforme	C1621958	TDGF1P3	6998	P51864	teratocarcinoma-derived growth factor 1 pseudogene 3	Calcium-binding protein	52	0.631	0.5		0.02		1	2	0	2015	2018
Glioblastoma Multiforme	C1621958	ACTC1	70	P68032	actin alpha cardiac muscle 1	Cellular structure	69	0.61	0.538	0.73668	0.02		1	2	0	2017	2018
Glioblastoma Multiforme	C1621958	PRDX2	7001	P32119	peroxiredoxin 2	Enzyme	243	0.474	0.885	0.086513	0.02		1	2	0	2015	2019
Glioblastoma Multiforme	C1621958	TERF1	7013	P54274	telomeric repeat binding factor 1		102	0.563	0.692	0.90655	0.02		1	2	0	2017	2019
Glioblastoma Multiforme	C1621958	TFAM	7019	Q00059	transcription factor A, mitochondrial		147	0.529	0.731	0.17259	0.02		1	2	0	2017	2018
Glioblastoma Multiforme	C1621958	NR2F2	7026	P24468	nuclear receptor subfamily 2 group F member 2	Nuclear receptor	110	0.575	0.692	0.98972	0.02		1	2	0	2018	2019
Glioblastoma Multiforme	C1621958	TGFBR1	7046	P36897	transforming growth factor beta receptor 1	Kinase	347	0.451	0.885	0.85379	0.02		1	2	0	2008	2019
Glioblastoma Multiforme	C1621958	TLR1	7096	Q15399	toll like receptor 1		198	0.496	0.808	5.8704e-23	0.02		1	2	0	2018	2018
Glioblastoma Multiforme	C1621958	TLR2	7097	O60603	toll like receptor 2		749	0.361	0.923	1.0152e-06	0.02		1	2	0	2009	2019
Glioblastoma Multiforme	C1621958	ACTG1	71	P63261	actin gamma 1	Cellular structure	291	0.477	0.846	0.0047837	0.02		1	2	0	2015	2017
Glioblastoma Multiforme	C1621958	CLDN5	7122	O00501	claudin 5	Cell-cell junction	104	0.559	0.769	0.89512	0.02		1	2	0	2014	2018
Glioblastoma Multiforme	C1621958	TPT1	7178	P13693	tumor protein, translationally-controlled 1	Cellular structure	143	0.528	0.731	0.80548	0.02		1	2	0	2018	2019
Glioblastoma Multiforme	C1621958	TRAF6	7189	Q9Y4K3	TNF receptor associated factor 6	Signaling	254	0.472	0.808	0.99739	0.02		1	2	0	2017	2019
Glioblastoma Multiforme	C1621958	HSP90B2P	7190	Q58FF3	heat shock protein 90 beta family member 2, pseudogene	Chaperone	110	0.558	0.846		0.02		1	2	0	2013	2014
Glioblastoma Multiforme	C1621958	ACTG2	72	P63267	actin gamma 2, smooth muscle	Cellular structure	205	0.505	0.808	0.071036	0.02		1	2	0	2015	2017
Glioblastoma Multiforme	C1621958	CCT3	7203	P49368	chaperonin containing TCP1 subunit 3	Chaperone	43	0.65	0.577	0.99998	0.02		1	2	0	2019	2019
Glioblastoma Multiforme	C1621958	TRP-AGG2-6	7218		tRNA-Pro (anticodon AGG) 2-6		34	0.666	0.462		0.02		1	2	0	2004	2007
Glioblastoma Multiforme	C1621958	MIR663A	724033		microRNA 663a		81	0.576	0.769		0.02		1	2	0	2014	2016
Glioblastoma Multiforme	C1621958	POTEF	728378	A5A3E0	POTE ankyrin domain family member F		215	0.481	0.885	5.4522e-06	0.02		1	2	0	2007	2014
Glioblastoma Multiforme	C1621958	UBE2N	7334	P61088	ubiquitin conjugating enzyme E2 N		80	0.593	0.654	0.88156	0.02		1	2	0	2007	2019
Glioblastoma Multiforme	C1621958	SUMO1	7341	P63165	small ubiquitin like modifier 1		133	0.533	0.731	0.86128	0.02		1	2	0	2013	2014
Glioblastoma Multiforme	C1621958	UCN	7349	P55089	urocortin	Signaling	134	0.539	0.769	0.44958	0.02		1	2	0	2005	2015
Glioblastoma Multiforme	C1621958	UGCG	7357	Q16739	UDP-glucose ceramide glucosyltransferase	Enzyme	111	0.56	0.808	0.94147	0.02		1	2	0	2010	2019
Glioblastoma Multiforme	C1621958	USP4	7375	Q13107	ubiquitin specific peptidase 4	Enzyme	40	0.686	0.308	1.6119e-09	0.02		1	2	0	2019	2019
Glioblastoma Multiforme	C1621958	VPS51	738	Q9UID3	VPS51 subunit of GARP complex		292	0.452	0.846	1.052e-08	0.02		1	2	0	1998	2010
Glioblastoma Multiforme	C1621958	VCP	7415	P55072	valosin containing protein		376	0.469	0.923	0.99999	0.02		1	2	0	2018	2019
Glioblastoma Multiforme	C1621958	EZR	7430	P15311	ezrin	Cellular structure	255	0.476	0.808	0.17989	0.02		1	2	0	2000	2010
Glioblastoma Multiforme	C1621958	VWF	7450	P04275	von Willebrand factor	Enzyme modulator	498	0.408	0.885	3.2187e-25	0.02		1	2	0	2019	2019
Glioblastoma Multiforme	C1621958	WIPF1	7456	O43516	WAS/WASL interacting protein family member 1		108	0.584	0.731	0.90296	0.02		1	2	0	2017	2018
Glioblastoma Multiforme	C1621958	XPO1	7514	O14980	exportin 1	Receptor	178	0.504	0.692	1	0.02		1	2	0	2018	2018
Glioblastoma Multiforme	C1621958	XRCC1	7515	P18887	X-ray repair cross complementing 1		410	0.421	0.923	6.3386e-09	0.02		1	2	1	2008	2016
Glioblastoma Multiforme	C1621958	ZFP36	7538	P26651	ZFP36 ring finger protein	Nucleic acid binding	161	0.523	0.692	0.75244	0.02		1	2	0	2012	2013
Glioblastoma Multiforme	C1621958	CA2	760	P00918	carbonic anhydrase 2		210	0.506	0.808	1.6946e-06	0.02		1	2	0	2016	2019
Glioblastoma Multiforme	C1621958	MIR671	768213		microRNA 671		47	0.636	0.577		0.02		1	2	0	2016	2018
Glioblastoma Multiforme	C1621958	DAP3	7818	P51398	death associated protein 3	Nucleic acid binding	34	0.686	0.385	1.1143e-09	0.02		1	2	0	2001	2007
Glioblastoma Multiforme	C1621958	USP7	7874	Q93009	ubiquitin specific peptidase 7	Enzyme	153	0.538	0.808	1	0.02		1	2	0	2008	2016
Glioblastoma Multiforme	C1621958	ST8SIA4	7903	Q92187	ST8 alpha-N-acetyl-neuraminide alpha-2,8-sialyltransferase 4		117	0.546	0.846	0.00040145	0.02		1	2	0	2019	2019
Glioblastoma Multiforme	C1621958	CHAC1	79094	Q9BUX1	ChaC glutathione specific gamma-glutamylcyclotransferase 1		28	0.7	0.462	0.00020552	0.02		1	2	0	2017	2018
Glioblastoma Multiforme	C1621958	MAPKAP1	79109	Q9BPZ7	MAPK associated protein 1		77	0.61	0.731	0.99991	0.02		1	2	0	2005	2017
Glioblastoma Multiforme	C1621958	CAMKMT	79823	Q7Z624	calmodulin-lysine N-methyltransferase		185	0.51	0.808	1.3806e-15	0.02		1	2	0	2000	2017
Glioblastoma Multiforme	C1621958	L2HGDH	79944	Q9H9P8	L-2-hydroxyglutarate dehydrogenase	Enzyme	62	0.653	0.462	4.2231e-05	0.02		1	2	0	2008	2011
Glioblastoma Multiforme	C1621958	DHDDS	79947	Q86SQ9	dehydrodolichyl diphosphate synthase subunit	Enzyme	308	0.468	0.885	0.24533	0.02		1	2	0	2019	2019
Glioblastoma Multiforme	C1621958	WLS	79971	Q5T9L3	Wnt ligand secretion mediator		166	0.513	0.731	0.020463	0.02		1	2	0	2008	2008
Glioblastoma Multiforme	C1621958	SPHKAP	80309	Q2M3C7	SPHK1 interactor, AKAP domain containing		26	0.695	0.462	0.93594	0.02		1	2	0	2015	2019
Glioblastoma Multiforme	C1621958	PPP1R2C	80316	O14990	PPP1R2C family member C	Enzyme modulator	231	0.478	0.846		0.02		1	2	0	2012	2018
Glioblastoma Multiforme	C1621958	USP5	8078	P45974	ubiquitin specific peptidase 5	Enzyme	40	0.67	0.577	0.96396	0.02		1	2	0	2012	2017
Glioblastoma Multiforme	C1621958	YEATS4	8089	O95619	YEATS domain containing 4	Nucleic acid binding	40	0.666	0.231	7.464e-05	0.02		1	2	0	1997	2012
Glioblastoma Multiforme	C1621958	ACTN4	81	O43707	actinin alpha 4		166	0.508	0.808	1	0.02		1	2	0	2014	2019
Glioblastoma Multiforme	C1621958	ACTL8	81569	Q9H568	actin like 8	Cellular structure	14	0.769	0.192	0.31835	0.02		1	2	0	2013	2019
Glioblastoma Multiforme	C1621958	MIA	8190	Q16674	MIA SH3 domain containing		130	0.537	0.769	1.7345e-05	0.02		1	2	0	2010	2019
Glioblastoma Multiforme	C1621958	CAPN2	824	P17655	calpain 2	Enzyme	87	0.59	0.692	3.519e-22	0.02		1	2	0	2010	2012
Glioblastoma Multiforme	C1621958	CAPNS1	826	P04632	calpain small subunit 1		37	0.674	0.538	7.11e-07	0.02		1	2	0	2014	2016
Glioblastoma Multiforme	C1621958	CAST	831	P20810	calpastatin		141	0.541	0.846	4.1218e-12	0.02		1	2	0	1993	2018
Glioblastoma Multiforme	C1621958	AXIN1	8312	O15169	axin 1		118	0.559	0.577	0.40765	0.02		1	2	0	2015	2017
Glioblastoma Multiforme	C1621958	AXIN2	8313	Q9Y2T1	axin 2		169	0.507	0.692	0.57015	0.02		1	2	0	2015	2016
Glioblastoma Multiforme	C1621958	FZD4	8322	Q9ULV1	frizzled class receptor 4	G-protein coupled receptor	239	0.49	0.923	0.96962	0.02		1	2	0	2011	2018
Glioblastoma Multiforme	C1621958	FZD6	8323	O60353	frizzled class receptor 6	G-protein coupled receptor	57	0.623	0.615	2.0034e-12	0.02		1	2	0	2014	2016
Glioblastoma Multiforme	C1621958	H3C1	8350	P68431	H3 clustered histone 1		37	0.67	0.308	6.293e-07	0.02		1	2	1	2013	2015
Glioblastoma Multiforme	C1621958	H3C4	8351	P68431	H3 clustered histone 4		36	0.67	0.308	0.00113	0.02		1	2	0	2013	2015
Glioblastoma Multiforme	C1621958	H3C3	8352	P68431	H3 clustered histone 3		36	0.67	0.308	0.26064	0.02		1	2	0	2013	2015
Glioblastoma Multiforme	C1621958	H3C6	8353	P68431	H3 clustered histone 6		38	0.666	0.346	1.4382e-06	0.02		1	2	0	2013	2015
Glioblastoma Multiforme	C1621958	H3C11	8354	P68431	H3 clustered histone 11		38	0.663	0.308	0.0084746	0.02		1	2	1	2013	2015
Glioblastoma Multiforme	C1621958	H3C8	8355	P68431	H3 clustered histone 8		37	0.67	0.308	1.1617e-06	0.02		1	2	0	2013	2015
Glioblastoma Multiforme	C1621958	H3C12	8356	P68431	H3 clustered histone 12		38	0.666	0.385	0.60556	0.02		1	2	0	2013	2015
Glioblastoma Multiforme	C1621958	H3C10	8357	P68431	H3 clustered histone 10		36	0.67	0.308	0.0057387	0.02		1	2	0	2013	2015
Glioblastoma Multiforme	C1621958	IMMP2L	83943	Q96T52	inner mitochondrial membrane peptidase subunit 2		55	0.628	0.577	0.011165	0.02		1	2	0	2012	2016
Glioblastoma Multiforme	C1621958	CASP7	840	P55210	caspase 7	Enzyme	83	0.581	0.654	5.3589e-05	0.02		1	2	0	2007	2008
Glioblastoma Multiforme	C1621958	MAGT1	84061	Q9H0U3	magnesium transporter 1	Transporter	120	0.548	0.769	0.96138	0.02		1	2	0	2013	2018
Glioblastoma Multiforme	C1621958	MINDY4	84182	Q4G0A6	MINDY lysine 48 deubiquitinase 4		122	0.538	0.731	3.2175e-19	0.02		1	2	0	2013	2018
Glioblastoma Multiforme	C1621958	RNF135	84282	Q8IUD6	ring finger protein 135		41	0.686	0.5	2.1992e-09	0.02		0.5	2	0	2016	2019
Glioblastoma Multiforme	C1621958	RAD54L	8438	Q92698	RAD54 like		46	0.633	0.423	2.3634e-15	0.02		1	2	0	2018	2018
Glioblastoma Multiforme	C1621958	SNORD35B	84546		small nucleolar RNA, C/D box 35B		41	0.653	0.538		0.02		1	2	0	2015	2017
Glioblastoma Multiforme	C1621958	CAT	847	P04040	catalase	Enzyme	794	0.359	0.962	1.6263e-10	0.02		1	2	0	2017	2019
Glioblastoma Multiforme	C1621958	GPR65	8477	Q8IYL9	G protein-coupled receptor 65	G-protein coupled receptor	47	0.653	0.5	0.1114	0.02		0.5	2	0	2018	2019
Glioblastoma Multiforme	C1621958	PHF5A	84844	Q7RTV0	PHD finger protein 5A		31	0.686	0.308	0.86605	0.02		1	2	0	2013	2019
Glioblastoma Multiforme	C1621958	RIOX2	84864	Q8IUF8	ribosomal oxygenase 2		68	0.612	0.538	2.2584e-08	0.02		1	2	0	2017	2018
Glioblastoma Multiforme	C1621958	PIK3R3	8503	Q92569	phosphoinositide-3-kinase regulatory subunit 3	Enzyme modulator	101	0.556	0.692	3.3583e-10	0.02		1	2	0	1995	2012
Glioblastoma Multiforme	C1621958	SNORD14B	85388		small nucleolar RNA, C/D box 14B		40	0.656	0.538		0.02		1	2	0	2015	2017
Glioblastoma Multiforme	C1621958	SNORD14C	85389		small nucleolar RNA, C/D box 14C		41	0.653	0.538		0.02		1	2	0	2015	2017
Glioblastoma Multiforme	C1621958	SNORD14D	85390		small nucleolar RNA, C/D box 14D		41	0.653	0.538		0.02		1	2	0	2015	2017
Glioblastoma Multiforme	C1621958	SNORD14E	85391		small nucleolar RNA, C/D box 14E		41	0.653	0.538		0.02		1	2	0	2015	2017
Glioblastoma Multiforme	C1621958	MKNK1	8569	Q9BUB5	MAPK interacting serine/threonine kinase 1	Kinase	73	0.606	0.808	8.0483e-10	0.02		1	2	0	2010	2011
Glioblastoma Multiforme	C1621958	RUNX2	860	Q13950	RUNX family transcription factor 2	Transcription factor	405	0.437	0.846	0.94884	0.02		1	2	0	2014	2018
Glioblastoma Multiforme	C1621958	PSMG1	8624	O95456	proteasome assembly chaperone 1		97	0.579	0.731	0.00034234	0.02		1	2	0	2017	2017
Glioblastoma Multiforme	C1621958	PDE5A	8654	O76074	phosphodiesterase 5A		187	0.513	0.731	0.00010643	0.02		1	2	0	2014	2017
Glioblastoma Multiforme	C1621958	PEA15	8682	Q15121	proliferation and apoptosis adaptor protein 15		110	0.553	0.692	0.79212	0.02		1	2	0	2008	2010
Glioblastoma Multiforme	C1621958	MBTPS1	8720	Q14703	membrane bound transcription factor peptidase, site 1	Enzyme	148	0.532	0.692	7.5901e-09	0.02		1	2	0	2005	2017
Glioblastoma Multiforme	C1621958	TNFSF14	8740	O43557	TNF superfamily member 14	Signaling	143	0.529	0.769	0.051663	0.02		1	2	0	2018	2019
Glioblastoma Multiforme	C1621958	ADAM9	8754	Q13443	ADAM metallopeptidase domain 9	Enzyme	109	0.56	0.654	0.029431	0.02		1	2	0	2016	2017
Glioblastoma Multiforme	C1621958	RIPK2	8767	O43353	receptor interacting serine/threonine kinase 2	Kinase	83	0.587	0.769	0.39282	0.02		1	2	0	2018	2019
Glioblastoma Multiforme	C1621958	TNFRSF6B	8771	O95407	TNF receptor superfamily member 6b		145	0.528	0.731	3.874e-06	0.02		1	2	0	2001	2005
Glioblastoma Multiforme	C1621958	TNFRSF11A	8792	Q9Y6Q6	TNF receptor superfamily member 11a		270	0.48	0.846	0.0087667	0.02		1	2	0	2012	2013
Glioblastoma Multiforme	C1621958	TNFRSF10C	8794	O14798	TNF receptor superfamily member 10c		89	0.578	0.731	3.1588e-06	0.02		1	2	0	2013	2016
Glioblastoma Multiforme	C1621958	TRIM24	8805	O15164	tripartite motif containing 24		79	0.581	0.615	1	0.02		1	2	0	2015	2017
Glioblastoma Multiforme	C1621958	IQGAP1	8826	P46940	IQ motif containing GTPase activating protein 1	Enzyme modulator	109	0.56	0.692	0.99754	0.02		1	2	0	2017	2019
Glioblastoma Multiforme	C1621958	HDAC3	8841	O15379	histone deacetylase 3	Epigenetic regulator	179	0.511	0.731	0.56737	0.02		1	2	0	2016	2019
Glioblastoma Multiforme	C1621958	KRIT1	889	O00522	KRIT1 ankyrin repeat containing		201	0.5	0.808	0.00069333	0.02		1	2	0	2000	2017
Glioblastoma Multiforme	C1621958	H3C7	8968	P68431	H3 clustered histone 7		36	0.67	0.308	0.0065896	0.02		1	2	0	2013	2015
Glioblastoma Multiforme	C1621958	CCNE1	898	P24864	cyclin E1	Enzyme modulator	133	0.538	0.731	0.97187	0.02		1	2	0	2017	2019
Glioblastoma Multiforme	C1621958	CLDN1	9076	O95832	claudin 1	Cell-cell junction	234	0.481	0.808	0.0010103	0.02		1	2	0	2005	2014
Glioblastoma Multiforme	C1621958	NMI	9111	Q13287	N-myc and STAT interactor	Transcription factor	40	0.656	0.346	8.699e-06	0.02		1	2	0	2015	2018
Glioblastoma Multiforme	C1621958	ARHGEF2	9181	Q92974	Rho/Rac guanine nucleotide exchange factor 2		205	0.502	0.769	1	0.02		1	2	0	2014	2016
Glioblastoma Multiforme	C1621958	BUB3	9184	O43684	BUB3 mitotic checkpoint protein	Nucleic acid binding	96	0.588	0.615	0.80927	0.02		1	2	0	2013	2014
Glioblastoma Multiforme	C1621958	LRRFIP1	9208	Q32MZ4	LRR binding FLII interacting protein 1	Nucleic acid binding	38	0.678	0.5	0.019511	0.02		1	2	0	2009	2014
Glioblastoma Multiforme	C1621958	AURKB	9212	Q96GD4	aurora kinase B	Kinase	161	0.51	0.769	0.0044521	0.02		1	2	0	2018	2019
Glioblastoma Multiforme	C1621958	NOLC1	9221	Q14978	nucleolar and coiled-body phosphoprotein 1		47	0.641	0.615	0.00010396	0.02		0.5	2	0	1999	2003
Glioblastoma Multiforme	C1621958	IL32	9235	P24001	interleukin 32		200	0.495	0.731	3.7471e-09	0.02		1	2	0	2009	2020
Glioblastoma Multiforme	C1621958	MSC	9242	O60682	musculin		241	0.475	0.846	0.024651	0.02		1	2	0	2009	2010
Glioblastoma Multiforme	C1621958	CD8A	925	P01732	CD8a molecule		87	0.587	0.769	1.6806e-05	0.02		1	2	0	2017	2018
Glioblastoma Multiforme	C1621958	ADGRG1	9289	Q9Y653	adhesion G protein-coupled receptor G1	G-protein coupled receptor	106	0.59	0.654	5.3483e-10	0.02		1	2	0	2005	2017
Glioblastoma Multiforme	C1621958	ASIC3	9311	Q9UHC3	acid sensing ion channel subunit 3	Ion channel	51	0.663	0.538	3.4071e-07	0.02		1	2	0	2017	2017
Glioblastoma Multiforme	C1621958	SLIT2	9353	O94813	slit guidance ligand 2		177	0.511	0.769	1	0.02		1	2	0	2011	2018
Glioblastoma Multiforme	C1621958	CD86	942	P42081	CD86 molecule		219	0.483	0.769	0.94879	0.02		1	2	0	2017	2017
Glioblastoma Multiforme	C1621958	AIM2	9447	O14862	absent in melanoma 2		167	0.521	0.769	2.1942e-09	0.02		1	2	0	2019	2019
Glioblastoma Multiforme	C1621958	FHL5	9457	Q5TD97	four and a half LIM domains 5	Transcription factor	153	0.53	0.769	4.8464e-10	0.02		1	2	0	2015	2017
Glioblastoma Multiforme	C1621958	ROCK2	9475	O75116	Rho associated coiled-coil containing protein kinase 2	Kinase	154	0.529	0.808	1	0.02		1	2	0	2014	2015
Glioblastoma Multiforme	C1621958	NAPSA	9476	O96009	napsin A aspartic peptidase	Enzyme	89	0.576	0.654	7.1709e-14	0.02		1	2	0	2007	2015
Glioblastoma Multiforme	C1621958	CD36	948	P16671	CD36 molecule	Receptor	351	0.446	0.846	1.0857e-60	0.02		1	2	0	2015	2016
Glioblastoma Multiforme	C1621958	TBPL1	9519	P62380	TATA-box binding protein like 1	Transcription factor	198	0.506	0.846	0.37902	0.02		1	2	0	2014	2015
Glioblastoma Multiforme	C1621958	ENTPD1	953	P49961	ectonucleoside triphosphate diphosphohydrolase 1	Enzyme	206	0.499	0.769	0.0080716	0.02		1	2	0	2019	2019
Glioblastoma Multiforme	C1621958	CXCL14	9547	O95715	C-X-C motif chemokine ligand 14		125	0.554	0.731	0.037302	0.02		1	2	0	2018	2019
Glioblastoma Multiforme	C1621958	BCAR1	9564	P56945	BCAR1 scaffold protein, Cas family member		176	0.518	0.846	0.99808	0.02		1	2	0	2008	2018
Glioblastoma Multiforme	C1621958	ENTPD5	957	O75356	ectonucleoside triphosphate diphosphohydrolase 5 (inactive)	Enzyme	40	0.674	0.346	4.554e-05	0.02		1	2	0	2012	2019
Glioblastoma Multiforme	C1621958	EIF5B	9669	O60841	eukaryotic translation initiation factor 5B	Enzyme	14	0.78	0.269	0.99981	0.02		0.5	2	0	2019	2019
Glioblastoma Multiforme	C1621958	CD63	967	P08962	CD63 molecule		128	0.542	0.731	0.017439	0.02		1	2	0	2018	2018
Glioblastoma Multiforme	C1621958	PCLAF	9768	Q15004	PCNA clamp associated factor		125	0.538	0.769	0.16276	0.02		1	2	0	2008	2017
Glioblastoma Multiforme	C1621958	MVP	9961	Q14764	major vault protein	Nucleic acid binding	172	0.512	0.769	6.7564e-08	0.02		1	2	0	2013	2015
Glioblastoma Multiforme	C1621958	CDH1	999	P12830	cadherin 1		508	0.401	0.808	0.14631	0.02		1	2	0	2018	2019
Glioblastoma Multiforme	C1621958	NAT2	10	P11245	N-acetyltransferase 2	Enzyme	311	0.451	0.885	3.2744e-06	0.01		1	1	0	2008	2008
Glioblastoma Multiforme	C1621958	ADA	100	P00813	adenosine deaminase	Enzyme	379	0.44	0.885	2.8825e-12	0.01		1	1	0	2017	2017
Glioblastoma Multiforme	C1621958	RNA18SN5	100008588		RNA, 18S ribosomal N5		12	0.76	0.269		0.01		1	1	0	2007	2007
Glioblastoma Multiforme	C1621958	MIMT1	100073347		MER1 repeat containing imprinted transcript 1		6	0.839	0.038		0.01		1	1	0	2018	2018
Glioblastoma Multiforme	C1621958	MIR300	100126297		microRNA 300		53	0.623	0.5		0.01		1	1	0	2016	2016
Glioblastoma Multiforme	C1621958	MIR876	100126310		microRNA 876		37	0.666	0.385		0.01		1	1	0	2019	2019
Glioblastoma Multiforme	C1621958	MIR877	100126314		microRNA 877		34	0.67	0.385		0.01		1	1	0	2019	2019
Glioblastoma Multiforme	C1621958	MIR374B	100126317		microRNA 374b		53	0.621	0.5		0.01		1	1	0	2019	2019
Glioblastoma Multiforme	C1621958	MIR708	100126333		microRNA 708		86	0.57	0.692		0.01		1	1	0	2013	2013
Glioblastoma Multiforme	C1621958	MIR885	100126334		microRNA 885		70	0.597	0.615		0.01		1	1	0	2019	2019
Glioblastoma Multiforme	C1621958	MIR543	100126335		microRNA 543		68	0.593	0.692		0.01		1	1	0	2017	2017
Glioblastoma Multiforme	C1621958	MIR297	100126354		microRNA 297		15	0.751	0.192		0.01		1	1	0	2013	2013
Glioblastoma Multiforme	C1621958	KIR2DS2	100132285	P43631	killer cell immunoglobulin like receptor, two Ig domains and short cytoplasmic tail 2		69	0.599	0.615		0.01		1	1	0	2014	2014
Glioblastoma Multiforme	C1621958	NBPF10	100132406	Q6P3W6	NBPF member 10		2	0.931	0.077	4.1008e-85	0.01		1	1	0	2014	2014
Glioblastoma Multiforme	C1621958	CD24	100133941	P25063	CD24 molecule		244	0.472	0.769		0.01		1	1	0	2007	2007
Glioblastoma Multiforme	C1621958	HDAC5	10014	Q9UQL6	histone deacetylase 5	Epigenetic regulator	114	0.552	0.769	1	0.01		1	1	0	2011	2011
Glioblastoma Multiforme	C1621958	PDCD6IP	10015	Q8WUM4	programmed cell death 6 interacting protein	Receptor	39	0.663	0.5	0.70554	0.01		1	1	0	2017	2017
Glioblastoma Multiforme	C1621958	PDCD6	10016	O75340	programmed cell death 6		45	0.653	0.5	0.0088799	0.01		1	1	0	2017	2017
Glioblastoma Multiforme	C1621958	MIR1224	100187716		microRNA 1224		36	0.666	0.385		0.01		1	1	0	2015	2015
Glioblastoma Multiforme	C1621958	MIR1225	100188847		microRNA 1225		32	0.674	0.423		0.01		1	1	0	2018	2018
Glioblastoma Multiforme	C1621958	MFT2	100188881		Trichoepithelioma, multiple familial, 2		75	0.601	0.692		0.01		1	1	0	2016	2016
Glioblastoma Multiforme	C1621958	FRAT1	10023	Q92837	FRAT regulator of WNT signaling pathway 1		40	0.653	0.462	0.32349	0.01		1	1	0	2013	2013
Glioblastoma Multiforme	C1621958	CDH5	1003	P33151	cadherin 5		103	0.561	0.692	0.51314	0.01		1	1	0	2013	2013
Glioblastoma Multiforme	C1621958	MIR513C	100302114		microRNA 513c		4	0.861	0.038		0.01		1	1	0	2015	2015
Glioblastoma Multiforme	C1621958	MIR1468	100302115		microRNA 1468		15	0.751	0.154		0.01		1	1	0	2017	2017
Glioblastoma Multiforme	C1621958	MIR1275	100302123		microRNA 1275		36	0.67	0.423		0.01		1	1	0	2019	2019
Glioblastoma Multiforme	C1621958	MIR1288	100302124		microRNA 1288		16	0.751	0.115		0.01		1	1	0	2017	2017
Glioblastoma Multiforme	C1621958	MIR1246	100302142		microRNA 1246		76	0.592	0.808		0.01		1	1	0	2020	2020
Glioblastoma Multiforme	C1621958	MIR1270	100302179		microRNA 1270		23	0.711	0.346		0.01		1	1	0	2019	2019
Glioblastoma Multiforme	C1621958	MIR1271	100302203		microRNA 1271		38	0.659	0.5		0.01		1	1	0	2018	2018
Glioblastoma Multiforme	C1621958	MIR1238	100302226		microRNA 1238		11	0.78	0.115		0.01		1	1	0	2019	2019
Glioblastoma Multiforme	C1621958	MIR1179	100302235		microRNA 1179		26	0.7	0.231		0.01		1	1	0	2017	2017
Glioblastoma Multiforme	C1621958	MIR1908	100302263		microRNA 1908		37	0.67	0.577		0.01		1	1	0	2015	2015
Glioblastoma Multiforme	C1621958	CHAF1A	10036	Q13111	chromatin assembly factor 1 subunit A	Nucleic acid binding	94	0.581	0.808	1	0.01		1	1	0	2015	2015
Glioblastoma Multiforme	C1621958	PARP3	10039	Q9Y6F1	poly(ADP-ribose) polymerase family member 3		22	0.729	0.385	1.9738e-14	0.01		1	1	0	2015	2015
Glioblastoma Multiforme	C1621958	MIR4284	100422948		microRNA 4284		14	0.805	0.154		0.01		1	1	0	2014	2014
Glioblastoma Multiforme	C1621958	MIR3666	100500896		microRNA 3666		24	0.7	0.308		0.01		1	1	0	2019	2019
Glioblastoma Multiforme	C1621958	MIR3908	100500909		microRNA 3908		11	0.78	0.115		0.01		1	1	0	2017	2017
Glioblastoma Multiforme	C1621958	GAPLINC	100505592		gastric adenocarcinoma associated, positive CD44 regulator, long intergenic non-coding RNA		20	0.736	0.269		0.01		1	1	0	2019	2019
Glioblastoma Multiforme	C1621958	LOC100505909	100505909		histidine-rich glycoprotein		17	0.722	0.385		0.01		1	1	0	2009	2009
Glioblastoma Multiforme	C1621958	LINC00645	100505967		long intergenic non-protein coding RNA 645		4	0.89	0.038		0.01		1	1	0	2019	2019
Glioblastoma Multiforme	C1621958	TRG-AS1	100506776		T cell receptor gamma locus antisense RNA 1		4	0.861	0.038		0.01		1	1	0	2019	2019
Glioblastoma Multiforme	C1621958	LINC01132	100506810		long intergenic non-protein coding RNA 1132		4	0.861	0.038		0.01		1	1	0	2018	2018
Glioblastoma Multiforme	C1621958	ADAMTS9-AS2	100507098		ADAMTS9 antisense RNA 2		50	0.656	0.462		0.01		1	1	0	2019	2019
Glioblastoma Multiforme	C1621958	MICA	100507436	Q29983	MHC class I polypeptide-related sequence A		248	0.473	0.846	0.0049697	0.01		1	1	0	2013	2013
Glioblastoma Multiforme	C1621958	EGFR-AS1	100507500		EGFR antisense RNA 1		20	0.722	0.192		0.01		1	1	0	2019	2019
Glioblastoma Multiforme	C1621958	RPL17-C18orf32	100526842		RPL17-C18orf32 readthrough		93	0.572	0.615	0.57502	0.01		1	1	0	2019	2019
Glioblastoma Multiforme	C1621958	ABCC5	10057	O15440	ATP binding cassette subfamily C member 5	Transporter	71	0.606	0.654	0.0041518	0.01		1	1	0	2002	2002
Glioblastoma Multiforme	C1621958	DNM1L	10059	O00429	dynamin 1 like	Enzyme modulator	273	0.475	0.808	0.00056753	0.01		1	1	0	2014	2014
Glioblastoma Multiforme	C1621958	ERVK-10	100616101		endogenous retrovirus group K member 10		21	0.729	0.346		0.01		1	1	0	2019	2019
Glioblastoma Multiforme	C1621958	ERVK-9	100616102		endogenous retrovirus group K member 9		25	0.711	0.346		0.01		1	1	0	2019	2019
Glioblastoma Multiforme	C1621958	ERVK-21	100616103		endogenous retrovirus group K member 21, envelope		21	0.729	0.346		0.01		1	1	0	2019	2019
Glioblastoma Multiforme	C1621958	MIR4516	100616258		microRNA 4516		26	0.695	0.385		0.01		1	1	0	2019	2019
Glioblastoma Multiforme	C1621958	MIR4484	100616327		microRNA 4484		10	0.792	0.269		0.01		1	1	0	2017	2017
Glioblastoma Multiforme	C1621958	MIR4758	100616340		microRNA 4758		6	0.821	0.038		0.01		1	1	0	2018	2018
Glioblastoma Multiforme	C1621958	MIR4443	100616407		microRNA 4443		22	0.729	0.385		0.01		1	1	0	2019	2019
Glioblastoma Multiforme	C1621958	MIR4429	100616469		microRNA 4429		14	0.751	0.192		0.01		1	1	0	2019	2019
Glioblastoma Multiforme	C1621958	PCAT1	100750225		prostate cancer associated transcript 1		90	0.575	0.615		0.01		1	1	0	2016	2016
Glioblastoma Multiforme	C1621958	HIF1A-AS1	100750246		HIF1A antisense RNA 1		20	0.729	0.269		0.01		1	1	0	2015	2015
Glioblastoma Multiforme	C1621958	ERVK-18	100775105		endogenous retrovirus group K member 18		106	0.56	0.654		0.01		1	1	0	2019	2019
Glioblastoma Multiforme	C1621958	ERVK-25	100862683		endogenous retrovirus group K member 25		21	0.729	0.346		0.01		1	1	0	2019	2019
Glioblastoma Multiforme	C1621958	ERVK-24	100862684		endogenous retrovirus group K member 24		22	0.722	0.346		0.01		1	1	0	2019	2019
Glioblastoma Multiforme	C1621958	HOXB-AS1	100874362		HOXB cluster antisense RNA 1		5	0.861	0.038		0.01		1	1	0	2019	2019
Glioblastoma Multiforme	C1621958	LINC-ROR	100885779		long intergenic non-protein coding RNA, regulator of reprogramming		108	0.548	0.769		0.01		1	1	0	2019	2019
Glioblastoma Multiforme	C1621958	APOBEC3A_B	100913187	P31941	APOBEC3A and APOBEC3B deletion hybrid		40	0.663	0.5		0.01		1	1	0	2015	2015
Glioblastoma Multiforme	C1621958	ACTR3	10096	P61158	actin related protein 3	Cellular structure	31	0.686	0.385	0.99986	0.01		1	1	0	2015	2015
Glioblastoma Multiforme	C1621958	COMETT	100996266		cytosolic oncogenic antisense to MET transcript		41	0.678	0.538		0.01		1	1	0	2016	2016
Glioblastoma Multiforme	C1621958	ADAM8	101	P78325	ADAM metallopeptidase domain 8	Enzyme	81	0.59	0.731	2.1983e-14	0.01		1	1	0	2019	2019
Glioblastoma Multiforme	C1621958	PPIF	10105	P30405	peptidylprolyl isomerase F		78	0.593	0.692	0.0019919	0.01		1	1	0	2018	2018
Glioblastoma Multiforme	C1621958	CDH13	1012	P55290	cadherin 13		205	0.501	0.846	0.0007058	0.01		1	1	0	2016	2016
Glioblastoma Multiforme	C1621958	ARL4C	10123	P56559	ADP ribosylation factor like GTPase 4C		42	0.656	0.308	0.76081	0.01		1	1	0	2019	2019
Glioblastoma Multiforme	C1621958	PDIA6	10130	Q15084	protein disulfide isomerase family A member 6		25	0.7	0.462	0.24911	0.01		1	1	0	2017	2017
Glioblastoma Multiforme	C1621958	CEBPZ	10153	Q03701	CCAAT enhancer binding protein zeta	Transcription factor	76	0.595	0.692	6.5282e-06	0.01		1	1	0	2018	2018
Glioblastoma Multiforme	C1621958	ATP6AP2	10159	O75787	ATPase H+ transporting accessory protein 2	Receptor	184	0.525	0.769	0.87089	0.01		1	1	0	2017	2017
Glioblastoma Multiforme	C1621958	SAMMSON	101927152		survival associated mitochondrial melanoma specific oncogenic non-coding RNA		18	0.78	0.231		0.01		1	1	0	2019	2019
Glioblastoma Multiforme	C1621958	HMMR-AS1	101927813		HMMR antisense RNA 1		11	0.792	0.154		0.01		1	1	0	2018	2018
Glioblastoma Multiforme	C1621958	UBE2R2-AS1	101929665		UBE2R2 antisense RNA 1		7	0.839	0.038		0.01		1	1	0	2019	2019
Glioblastoma Multiforme	C1621958	RNF41	10193	Q9H4P4	ring finger protein 41		40	0.674	0.538	0.96847	0.01		1	1	0	2017	2017
Glioblastoma Multiforme	C1621958	CALCRL	10203	Q16602	calcitonin receptor like receptor	G-protein coupled receptor	47	0.653	0.692	0.9853	0.01		1	1	0	2002	2002
Glioblastoma Multiforme	C1621958	MPZL2	10205	O60487	myelin protein zero like 2		40	0.653	0.5	1.0755e-12	0.01		1	1	0	2016	2016
Glioblastoma Multiforme	C1621958	MSLN	10232	Q13421	mesothelin	Extracellular structure	146	0.525	0.692	5.8751e-25	0.01		1	1	0	2017	2017
Glioblastoma Multiforme	C1621958	MIR6798	102466738		microRNA 6798		4	0.861	0.038		0.01		1	1	0	2018	2018
Glioblastoma Multiforme	C1621958	SPRY3	10251	O43610	sprouty RTK signaling antagonist 3	Signaling	4	0.89	0.077	0.0038066	0.01		1	1	0	2019	2019
Glioblastoma Multiforme	C1621958	ABCC4	10257	O15439	ATP binding cassette subfamily C member 4	Transporter	146	0.536	0.769	1.0674e-07	0.01		1	1	0	2002	2002
Glioblastoma Multiforme	C1621958	RAMP3	10268	O60896	receptor activity modifying protein 3	Receptor	26	0.722	0.269	0.016373	0.01		1	1	0	2002	2002
Glioblastoma Multiforme	C1621958	SIK1B	102724428	A0A0B4J2F2;P57059	salt inducible kinase 1B (putative)		48	0.653	0.385		0.01		0	1	0	2016	2016
Glioblastoma Multiforme	C1621958	CDKN1C	1028	P49918	cyclin dependent kinase inhibitor 1C		298	0.456	0.846	0.81963	0.01		1	1	0	2004	2004
Glioblastoma Multiforme	C1621958	TPTEP2-CSNK1E	102800317	P49674	TPTEP2-CSNK1E readthrough		35	0.678	0.5		0.01		1	1	0	2018	2018
Glioblastoma Multiforme	C1621958	TFG	10342	Q92734	trafficking from ER to golgi regulator		104	0.595	0.615	0.14061	0.01		1	1	0	2007	2007
Glioblastoma Multiforme	C1621958	CDO1	1036	Q16878	cysteine dioxygenase type 1		72	0.592	0.654	0.0096603	0.01		1	1	0	2014	2014
Glioblastoma Multiforme	C1621958	TUBB4A	10382	P04350	tubulin beta 4A class IVa	Cellular structure	107	0.608	0.615	0.1091	0.01		1	1	0	2019	2019
Glioblastoma Multiforme	C1621958	DLC1	10395	Q96QB1	DLC1 Rho GTPase activating protein		144	0.529	0.731	0.99948	0.01		1	1	0	2001	2001
Glioblastoma Multiforme	C1621958	MYL9	10398	P24844	myosin light chain 9	Calcium-binding protein	52	0.653	0.423	0.019797	0.01		1	1	0	2019	2019
Glioblastoma Multiforme	C1621958	CDS1	1040	Q92903	CDP-diacylglycerol synthase 1		47	0.647	0.462	0.00064056	0.01		1	1	0	2012	2012
Glioblastoma Multiforme	C1621958	CDSN	1041	Q15517	corneodesmosin		101	0.585	0.731	0.46391	0.01		1	1	0	2015	2015
Glioblastoma Multiforme	C1621958	TUBGCP3	10426	Q96CW5	tubulin gamma complex associated protein 3	Cellular structure	11	0.78	0.231	0.4552	0.01		1	1	0	2015	2015
Glioblastoma Multiforme	C1621958	RBM14	10432	Q96PK6	RNA binding motif protein 14		54	0.628	0.615	0.99843	0.01		1	1	0	2014	2014
Glioblastoma Multiforme	C1621958	C1D	10438	Q13901	C1D nuclear receptor corepressor	Transcription factor	33	0.67	0.462	0.03411	0.01		1	1	0	2018	2018
Glioblastoma Multiforme	C1621958	MCRS1	10445	Q96EZ8	microspherule protein 1		37	0.666	0.385	0.16561	0.01		1	1	0	2010	2010
Glioblastoma Multiforme	C1621958	LRRN2	10446	O75325	leucine rich repeat neuronal 2	Receptor	15	0.769	0.192	0.7805	0.01		1	1	0	1998	1998
Glioblastoma Multiforme	C1621958	CDX2	1045	Q99626	caudal type homeobox 2	Transcription factor	278	0.458	0.769	0.52887	0.01		1	1	0	2015	2015
Glioblastoma Multiforme	C1621958	HAX1	10456	O00165	HCLS1 associated protein X-1		59	0.631	0.577	8.4813e-08	0.01		1	1	0	2019	2019
Glioblastoma Multiforme	C1621958	GPNMB	10457	Q14956	glycoprotein nmb	Signaling	103	0.566	0.692	2.8803e-27	0.01		1	1	0	2006	2006
Glioblastoma Multiforme	C1621958	FST	10468	P19883	follistatin	Enzyme modulator	182	0.513	0.731	0.98014	0.01		1	1	0	2010	2010
Glioblastoma Multiforme	C1621958	EIF3M	10480	Q7L2H7	eukaryotic translation initiation factor 3 subunit M		14	0.78	0.269	0.01748	0.01		1	1	0	1992	1992
Glioblastoma Multiforme	C1621958	HOXB13	10481	Q92826	homeobox B13		90	0.573	0.462	3.6879e-08	0.01		1	1	0	2019	2019
Glioblastoma Multiforme	C1621958	CAP1	10487	Q01518	cyclase associated actin cytoskeleton regulatory protein 1	Cellular structure	149	0.529	0.808	0.019817	0.01		1	1	0	2017	2017
Glioblastoma Multiforme	C1621958	CREB3	10488	O43889	cAMP responsive element binding protein 3		39	0.663	0.654	1.8489e-05	0.01		1	1	0	2019	2019
Glioblastoma Multiforme	C1621958	CEBPA	1050	P49715	CCAAT enhancer binding protein alpha	Transcription factor	201	0.496	0.692	0.55365	0.01		1	1	0	2019	2019
Glioblastoma Multiforme	C1621958	SEMA6B	10501	Q9H3T3	semaphorin 6B	Signaling	13	0.78	0.231	0.06227	0.01		1	1	0	2001	2001
Glioblastoma Multiforme	C1621958	KAT5	10524	Q92993	lysine acetyltransferase 5		138	0.534	0.769	0.088234	0.01		1	1	0	2016	2016
Glioblastoma Multiforme	C1621958	HYOU1	10525	Q9Y4L1	hypoxia up-regulated 1		66	0.633	0.731	0.86105	0.01		1	1	0	2001	2001
Glioblastoma Multiforme	C1621958	IPO8	10526	O15397	importin 8	Enzyme modulator	20	0.722	0.346	0.2344	0.01		1	1	0	2019	2019
Glioblastoma Multiforme	C1621958	RNASEH2A	10535	O75792	ribonuclease H2 subunit A	Enzyme	116	0.592	0.692	0.0041807	0.01		1	1	0	2016	2016
Glioblastoma Multiforme	C1621958	PERCC1	105371045	A0A1W2PR82	proline and glutamate rich with coiled coil 1		128	0.552	0.808		0.01		1	1	0	2019	2019
Glioblastoma Multiforme	C1621958	CERNA3	105375847		competing endogenous lncRNA 3 for miR-645		140	0.531	0.808		0.01		1	1	0	2013	2013
Glioblastoma Multiforme	C1621958	ERVK-19	105376906		endogenous retrovirus group K member 19, envelope		26	0.705	0.346		0.01		1	1	0	2019	2019
Glioblastoma Multiforme	C1621958	ANP32B	10541	Q92688	acidic nuclear phosphoprotein 32 family member B	Enzyme modulator	120	0.541	0.731	0.95827	0.01		1	1	0	2004	2004
Glioblastoma Multiforme	C1621958	PROCR	10544	Q9UNN8	protein C receptor	Enzyme modulator	110	0.56	0.692	0.0056256	0.01		1	1	0	2012	2012
Glioblastoma Multiforme	C1621958	ARFGEF2	10564	Q9Y6D5	ADP ribosylation factor guanine nucleotide exchange factor 2		52	0.659	0.462	0.99993	0.01		1	1	0	2019	2019
Glioblastoma Multiforme	C1621958	ARFGEF1	10565	Q9Y6D6	ADP ribosylation factor guanine nucleotide exchange factor 1		34	0.674	0.423	1	0.01		1	1	0	2019	2019
Glioblastoma Multiforme	C1621958	CCT7	10574	Q99832	chaperonin containing TCP1 subunit 7	Chaperone	14	0.78	0.192	0.98362	0.01		1	1	0	2019	2019
Glioblastoma Multiforme	C1621958	CCT2	10576	P78371	chaperonin containing TCP1 subunit 2	Chaperone	38	0.656	0.577	0.99853	0.01		1	1	0	2019	2019
Glioblastoma Multiforme	C1621958	SORBS1	10580	Q9BX66	sorbin and SH3 domain containing 1		124	0.554	0.769	1.534e-12	0.01		1	1	0	2017	2017
Glioblastoma Multiforme	C1621958	MXD4	10608	Q14582	MAX dimerization protein 4	Transcription factor	19	0.722	0.115	0.77635	0.01		1	1	0	2012	2012
Glioblastoma Multiforme	C1621958	FOXD1-AS1	106144539		FOXD1 antisense RNA 1		8	0.839	0.038		0.01		1	1	0	2020	2020
Glioblastoma Multiforme	C1621958	TXNIP	10628	Q9H3M7	thioredoxin interacting protein		208	0.49	0.731	0.15918	0.01		1	1	0	2017	2017
Glioblastoma Multiforme	C1621958	RASL10A	10633	Q92737	RAS like family 10 member A		10	0.792	0.077	0.18418	0.01		1	1	0	2012	2012
Glioblastoma Multiforme	C1621958	IGF2BP1	10642	Q9NZI8	insulin like growth factor 2 mRNA binding protein 1	Enzyme	106	0.56	0.692	0.99933	0.01		1	1	0	2015	2015
Glioblastoma Multiforme	C1621958	IGF2BP3	10643	O00425	insulin like growth factor 2 mRNA binding protein 3	Enzyme	97	0.57	0.577	0.99999	0.01		1	1	0	2017	2017
Glioblastoma Multiforme	C1621958	RN7SL263P	106480993		RNA, 7SL, cytoplasmic 263, pseudogene		189	0.496	0.808		0.01		0	1	0	2017	2017
Glioblastoma Multiforme	C1621958	CELF2	10659	O95319	CUGBP Elav-like family member 2		58	0.628	0.692	0.99965	0.01		1	1	0	2019	2019
Glioblastoma Multiforme	C1621958	CTCF	10664	P49711	CCCTC-binding factor	Transcription factor	186	0.504	0.769	0.99994	0.01		1	1	0	2016	2016
Glioblastoma Multiforme	C1621958	CD226	10666	Q15762	CD226 molecule		124	0.548	0.769	0.03921	0.01		1	1	0	2017	2017
Glioblastoma Multiforme	C1621958	CCT8	10694	P50990	chaperonin containing TCP1 subunit 8	Chaperone	10	0.805	0.115	0.96252	0.01		1	1	0	2015	2015
Glioblastoma Multiforme	C1621958	TCFL5	10732	Q9UL49	transcription factor like 5		34	0.682	0.423	0.99128	0.01		1	1	0	2007	2007
Glioblastoma Multiforme	C1621958	MAP3K2	10746	Q9Y2U5	mitogen-activated protein kinase kinase kinase 2	Kinase	37	0.686	0.231	0.99999	0.01		1	1	0	2019	2019
Glioblastoma Multiforme	C1621958	CHL1	10752	O00533	cell adhesion molecule L1 like		73	0.603	0.654	8.889e-12	0.01		1	1	0	2017	2017
Glioblastoma Multiforme	C1621958	GIPC1	10755	O14908	GIPC PDZ domain containing family member 1	Enzyme	54	0.628	0.577	0.0083114	0.01		1	1	0	2018	2018
Glioblastoma Multiforme	C1621958	TRAF3IP2	10758	O43734	TRAF3 interacting protein 2		103	0.585	0.692	1.615e-09	0.01		1	1	0	2018	2018
Glioblastoma Multiforme	C1621958	ZMYND11	10771	Q15326	zinc finger MYND-type containing 11		54	0.647	0.5	1	0.01		1	1	0	2017	2017
Glioblastoma Multiforme	C1621958	CFTR	1080	P13569	CF transmembrane conductance regulator	Ion channel	476	0.424	0.885	2.1735e-58	0.01		1	1	0	2019	2019
Glioblastoma Multiforme	C1621958	SEPTIN9	10801	Q9UHD8	septin 9	Enzyme modulator	150	0.548	0.769	0.99579	0.01		1	1	0	2018	2018
Glioblastoma Multiforme	C1621958	GJB6	10804	O95452	gap junction protein beta 6	Cell-cell junction	176	0.528	0.808	1.658e-07	0.01		1	1	0	2015	2015
Glioblastoma Multiforme	C1621958	CEACAM3	1084	P40198	CEA cell adhesion molecule 3		204	0.494	0.731	1.067e-09	0.01		1	1	0	2004	2004
Glioblastoma Multiforme	C1621958	TUBGCP2	10844	Q9BSJ2	tubulin gamma complex associated protein 2	Cellular structure	24	0.705	0.462	2.2003e-08	0.01		1	1	0	2015	2015
Glioblastoma Multiforme	C1621958	CYP46A1	10858	Q9Y6A2	cytochrome P450 family 46 subfamily A member 1	Enzyme	39	0.659	0.5	0.98552	0.01		1	1	0	2020	2020
Glioblastoma Multiforme	C1621958	CEACAM7	1087	Q14002	CEA cell adhesion molecule 7		202	0.494	0.769	1.3466e-07	0.01		1	1	0	2004	2004
Glioblastoma Multiforme	C1621958	SMR3B	10879	P02814	submaxillary gland androgen regulated protein 3B		74	0.601	0.654	0.38712	0.01		1	1	0	2018	2018
Glioblastoma Multiforme	C1621958	MRPS30	10884	Q9NP92	mitochondrial ribosomal protein S30		83	0.59	0.731	1.5937e-08	0.01		1	1	0	2014	2014
Glioblastoma Multiforme	C1621958	PPARGC1A	10891	Q9UBK2	PPARG coactivator 1 alpha	Transcription factor	350	0.453	0.885	0.9973	0.01		1	1	1	2019	2019
Glioblastoma Multiforme	C1621958	BRD8	10902	Q9H0E9	bromodomain containing 8		48	0.638	0.5	1.5564e-07	0.01		1	1	0	2019	2019
Glioblastoma Multiforme	C1621958	PAPOLA	10914	P51003	poly(A) polymerase alpha	Nucleic acid binding	79	0.593	0.731	0.99998	0.01		1	1	0	2014	2014
Glioblastoma Multiforme	C1621958	RAB40B	10966	Q12829	RAB40B, member RAS oncogene family		99	0.563	0.731	8.6559e-06	0.01		1	1	0	2019	2019
Glioblastoma Multiforme	C1621958	COPS6	10980	Q7L5N1	COP9 signalosome subunit 6	Enzyme	34	0.678	0.423	0.98666	0.01		1	1	0	2017	2017
Glioblastoma Multiforme	C1621958	SLC38A3	10991	Q99624	solute carrier family 38 member 3	Transporter	25	0.711	0.5		0.01		1	1	0	2004	2004
Glioblastoma Multiforme	C1621958	TLK2	11011	Q86UE8	tousled like kinase 2	Kinase	71	0.631	0.538	1	0.01		1	1	0	2019	2019
Glioblastoma Multiforme	C1621958	KDELR2	11014	P33947	KDEL endoplasmic reticulum protein retention receptor 2	Transporter	15	0.839	0.192	0.16699	0.01		1	1	0	2019	2019
Glioblastoma Multiforme	C1621958	ADRM1	11047	Q16186	adhesion regulating molecule 1		51	0.633	0.538	0.99704	0.01		1	1	0	2019	2019
Glioblastoma Multiforme	C1621958	DEPP1	11067	Q9NTK1	DEPP1 autophagy regulator		23	0.695	0.308	0.33608	0.01		1	1	0	2003	2003
Glioblastoma Multiforme	C1621958	TRIOBP	11078	Q9H2D6	TRIO and F-actin binding protein	Enzyme modulator	25	0.743	0.269	2.0161e-28	0.01		1	1	0	2018	2018
Glioblastoma Multiforme	C1621958	CD160	11126	O95971	CD160 molecule		87	0.59	0.615	6.8425e-05	0.01		1	1	0	2018	2018
Glioblastoma Multiforme	C1621958	KIF3A	11127	Q9Y496	kinesin family member 3A	Cellular structure	64	0.612	0.615	0.89775	0.01		1	1	0	2016	2016
Glioblastoma Multiforme	C1621958	PSIP1	11168	O75475	PC4 and SFRS1 interacting protein 1	Signaling	210	0.49	0.846	0.99668	0.01		1	1	0	2019	2019
Glioblastoma Multiforme	C1621958	FZD10	11211	Q9ULW2	frizzled class receptor 10	G-protein coupled receptor	29	0.705	0.308	0.00052847	0.01		1	1	0	2002	2002
Glioblastoma Multiforme	C1621958	POLG2	11232	Q9UHN1	DNA polymerase gamma 2, accessory subunit	Enzyme	158	0.558	0.769	1.528e-10	0.01		1	1	0	1995	1995
Glioblastoma Multiforme	C1621958	SAT2	112483	Q96F10	spermidine/spermine N1-acetyltransferase family member 2		37	0.686	0.462	2.7832e-06	0.01		1	1	0	2006	2006
Glioblastoma Multiforme	C1621958	CYTOR	112597		cytoskeleton regulator RNA		90	0.568	0.577		0.01		1	1	0	2018	2018
Glioblastoma Multiforme	C1621958	KLF8	11279	O95600	Kruppel like factor 8	Nucleic acid binding	55	0.628	0.462	0.0022471	0.01		1	1	0	2012	2012
Glioblastoma Multiforme	C1621958	CHRM2	1129	P08172	cholinergic receptor muscarinic 2	G-protein coupled receptor	91	0.585	0.615	0.18197	0.01		1	1	0	2019	2019
Glioblastoma Multiforme	C1621958	LINC02605	112935892		long intergenic non-protein coding RNA 2605		203	0.49	0.769		0.01		1	1	0	2018	2018
Glioblastoma Multiforme	C1621958	CHRM3	1131	P20309	cholinergic receptor muscarinic 3	G-protein coupled receptor	284	0.464	0.885	0.99253	0.01		1	1	0	2010	2010
Glioblastoma Multiforme	C1621958	MTFR2	113115	Q6P444	mitochondrial fission regulator 2		6	0.861	0.077	2.6584e-06	0.01		1	1	0	2018	2018
Glioblastoma Multiforme	C1621958	PDAP1	11333	Q13442	PDGFA associated protein 1		95	0.576	0.769	0.049626	0.01		1	1	0	2014	2014
Glioblastoma Multiforme	C1621958	CBX3	11335	Q13185	chromobox 3	Epigenetic regulator	53	0.633	0.346	0.40951	0.01		1	1	0	2019	2019
Glioblastoma Multiforme	C1621958	CMTM1	113540	Q8IZ96	CKLF like MARVEL transmembrane domain containing 1		14	0.769	0.269	0.0022376	0.01		1	1	0	2015	2015
Glioblastoma Multiforme	C1621958	LINC00313	114038	P59037	long intergenic non-protein coding RNA 313		17	0.736	0.154		0.01		1	1	0	2019	2019
Glioblastoma Multiforme	C1621958	TRIM9	114088	Q9C026	tripartite motif containing 9		24	0.705	0.5	0.99973	0.01		1	1	0	2018	2018
Glioblastoma Multiforme	C1621958	TIRAP	114609	P58753	TIR domain containing adaptor protein		74	0.604	0.769	0.00076118	0.01		1	1	0	2018	2018
Glioblastoma Multiforme	C1621958	CHUK	1147	O15111	component of inhibitor of nuclear factor kappa B kinase complex	Kinase	125	0.556	0.731	0.99403	0.01		1	1	0	2012	2012
Glioblastoma Multiforme	C1621958	ELFN2	114794	Q5R3F8	extracellular leucine rich repeat and fibronectin type III domain containing 2	Receptor	5	0.861	0.038	0.96483	0.01		1	1	0	2018	2018
Glioblastoma Multiforme	C1621958	C1QTNF1	114897	Q9BXJ1	C1q and TNF related 1		27	0.7	0.346	0.00042421	0.01		1	1	0	2019	2019
Glioblastoma Multiforme	C1621958	TSGA13	114960	Q96PP4	testis specific 13		9	0.78	0.154	7.3935e-10	0.01		1	1	0	2015	2015
Glioblastoma Multiforme	C1621958	VASN	114990	Q6EMK4	vasorin	Receptor	27	0.722	0.269	0.67248	0.01		1	1	0	2019	2019
Glioblastoma Multiforme	C1621958	CISH	1154	Q9NSE2	cytokine inducible SH2 containing protein	Enzyme modulator	195	0.5	0.808	0.00053852	0.01		1	1	0	2007	2007
Glioblastoma Multiforme	C1621958	H3P30	115482700		H3 histone pseudogene 30		17	0.736	0.346		0.01		1	1	0	2015	2015
Glioblastoma Multiforme	C1621958	H3P42	115482704		H3 histone pseudogene 42		45	0.641	0.577		0.01		1	1	0	2019	2019
Glioblastoma Multiforme	C1621958	H3P5	115482712		H3 histone pseudogene 5		40	0.656	0.538		0.01		1	1	0	2017	2017
Glioblastoma Multiforme	C1621958	TRMT61A	115708	Q96FX7	tRNA methyltransferase 61A	Enzyme	3	0.931	0.038	0.024387	0.01		1	1	0	2016	2016
Glioblastoma Multiforme	C1621958	CTHRC1	115908	Q96CG8	collagen triple helix repeat containing 1	Enzyme	105	0.556	0.692	2.6661e-05	0.01		1	1	0	2017	2017
Glioblastoma Multiforme	C1621958	ADCYAP1	116	P18509	adenylate cyclase activating polypeptide 1	Signaling	220	0.51	0.846	0.52424	0.01		1	1	0	2017	2017
Glioblastoma Multiforme	C1621958	BATF2	116071	Q8N1L9	basic leucine zipper ATF-like transcription factor 2	Transcription factor	62	0.638	0.385	0.58536	0.01		1	1	0	2017	2017
Glioblastoma Multiforme	C1621958	THEM4	117145	Q5T1C6	thioesterase superfamily member 4		33	0.674	0.462	3.8919e-07	0.01		1	1	0	2004	2004
Glioblastoma Multiforme	C1621958	MRGPRX3	117195	Q96LB0	MAS related GPR family member X3	G-protein coupled receptor	167	0.529	0.923		0.01		1	1	0	2018	2018
Glioblastoma Multiforme	C1621958	MRGPRX4	117196	Q96LA9	MAS related GPR family member X4	G-protein coupled receptor	166	0.531	0.923		0.01		1	1	0	2018	2018
Glioblastoma Multiforme	C1621958	CLCN3	1182	P51790	chloride voltage-gated channel 3	Ion channel	67	0.621	0.615	0.99973	0.01		1	1	0	2000	2000
Glioblastoma Multiforme	C1621958	ANTXR2	118429	P58335	ANTXR cell adhesion molecule 2	Receptor	143	0.568	0.808	0.086921	0.01		1	1	0	2018	2018
Glioblastoma Multiforme	C1621958	CLK2	1196	P49760	CDC like kinase 2	Kinase	27	0.691	0.462	0.99997	0.01		0	1	0	2016	2016
Glioblastoma Multiforme	C1621958	ADD3	120	Q9UEY8	adducin 3	Cellular structure	54	0.641	0.5	0.9988	0.01		1	1	0	2013	2013
Glioblastoma Multiforme	C1621958	TPP1	1200	O14773	tripeptidyl peptidase 1	Enzyme	151	0.551	0.808	6.2564e-07	0.01		0	1	0	1991	1991
Glioblastoma Multiforme	C1621958	CLTC	1213	Q00610	clathrin heavy chain	Transporter	141	0.558	0.769	1	0.01		1	1	0	2013	2013
Glioblastoma Multiforme	C1621958	H4-16	121504	P62805	H4 histone 16	Nucleic acid binding	122	0.54	0.692	0.022279	0.01		1	1	0	2015	2015
Glioblastoma Multiforme	C1621958	ALKBH2	121642	Q6NS38	alkB homolog 2, alpha-ketoglutarate dependent dioxygenase		16	0.76	0.154	0.0032745	0.01		1	1	0	2013	2013
Glioblastoma Multiforme	C1621958	LGMNP1	122199		legumain pseudogene 1		5	0.839	0.038		0.01		1	1	0	2019	2019
Glioblastoma Multiforme	C1621958	NAA30	122830	Q147X3	N-alpha-acetyltransferase 30, NatC catalytic subunit		4	0.861	0.038	0.98682	0.01		1	1	0	2015	2015
Glioblastoma Multiforme	C1621958	CCR1	1230	P32246	C-C motif chemokine receptor 1	G-protein coupled receptor	192	0.531	0.769	0.38775	0.01		1	1	0	2012	2012
Glioblastoma Multiforme	C1621958	CCR6	1235	P51684	C-C motif chemokine receptor 6	G-protein coupled receptor	231	0.485	0.808	0.0057867	0.01		1	1	0	2018	2018
Glioblastoma Multiforme	C1621958	CCR7	1236	P32248	C-C motif chemokine receptor 7	G-protein coupled receptor	320	0.443	0.769	0.057623	0.01		1	1	0	2018	2018
Glioblastoma Multiforme	C1621958	CMTM3	123920	Q96MX0	CKLF like MARVEL transmembrane domain containing 3		24	0.736	0.231	0.00014974	0.01		1	1	0	2015	2015
Glioblastoma Multiforme	C1621958	LTB4R	1241	Q15722	leukotriene B4 receptor	G-protein coupled receptor	107	0.576	0.692	0.11994	0.01		1	1	0	2017	2017
Glioblastoma Multiforme	C1621958	MSI2	124540	Q96DH6	musashi RNA binding protein 2		80	0.592	0.577	0.99478	0.01		1	1	0	2019	2019
Glioblastoma Multiforme	C1621958	CPT1C	126129	Q8TCG5	carnitine palmitoyltransferase 1C	Enzyme	51	0.691	0.5	2.1926e-09	0.01		1	1	0	2014	2014
Glioblastoma Multiforme	C1621958	PLK5	126520	Q496M5	polo like kinase 5	Kinase	11	0.78	0.192	9.1971e-05	0.01		1	1	0	2011	2011
Glioblastoma Multiforme	C1621958	CNTF	1270	P26441	ciliary neurotrophic factor		114	0.561	0.615	2.3384e-05	0.01		1	1	0	2008	2008
Glioblastoma Multiforme	C1621958	UHMK1	127933	Q8TAS1	U2AF homology motif kinase 1	Kinase	31	0.674	0.462	0.83404	0.01		1	1	0	2019	2019
Glioblastoma Multiforme	C1621958	COL4A1	1282	P02462	collagen type IV alpha 1 chain		277	0.484	0.731	1	0.01		1	1	0	2012	2012
Glioblastoma Multiforme	C1621958	PIFO	128344	Q8TCI5	primary cilia formation		20	0.736	0.346	8.9379e-08	0.01		0	1	0	2018	2018
Glioblastoma Multiforme	C1621958	COL4A3	1285	Q01955	collagen type IV alpha 3 chain		119	0.552	0.692	1.0699e-12	0.01		1	1	0	2003	2003
Glioblastoma Multiforme	C1621958	TMEM18	129787	Q96B42	transmembrane protein 18		17	0.729	0.308	0.0022182	0.01		1	1	0	2008	2008
Glioblastoma Multiforme	C1621958	FBLN7	129804	Q53RD9	fibulin 7		14	0.78	0.077	8.4159e-06	0.01		1	1	0	2019	2019
Glioblastoma Multiforme	C1621958	NEU4	129807	Q8WWR8	neuraminidase 4	Enzyme	12	0.805	0.077	4.0412e-07	0.01		1	1	0	2014	2014
Glioblastoma Multiforme	C1621958	RBM45	129831	Q8IUH3	RNA binding motif protein 45		557	0.383	0.846	2.1132e-10	0.01		1	1	0	2011	2011
Glioblastoma Multiforme	C1621958	COL17A1	1308	Q9UMD9	collagen type XVII alpha 1 chain		138	0.545	0.769	2.2869e-27	0.01		1	1	0	2017	2017
Glioblastoma Multiforme	C1621958	ZFP42	132625	Q96MM3	ZFP42 zinc finger protein	Transcription factor	30	0.678	0.346		0.01		1	1	0	2011	2011
Glioblastoma Multiforme	C1621958	COX5B	1329	P10606	cytochrome c oxidase subunit 5B	Enzyme	26	0.711	0.423	0.87383	0.01		1	1	0	2017	2017
Glioblastoma Multiforme	C1621958	IL31RA	133396	Q8NI17	interleukin 31 receptor A	Signaling	70	0.601	0.692	4.204e-16	0.01		1	1	0	1994	1994
Glioblastoma Multiforme	C1621958	EGFLAM	133584	Q63HQ2	EGF like, fibronectin type III and laminin G domains	Enzyme modulator	16	0.743	0.462	3.7564e-19	0.01		1	1	0	2019	2019
Glioblastoma Multiforme	C1621958	GPR151	134391	Q8TDV0	G protein-coupled receptor 151	G-protein coupled receptor	169	0.53	0.923	3.2266e-08	0.01		1	1	0	2018	2018
Glioblastoma Multiforme	C1621958	COX7A2	1347	P14406	cytochrome c oxidase subunit 7A2	Enzyme	8	0.839	0.038	0.0045177	0.01		1	1	0	2018	2018
Glioblastoma Multiforme	C1621958	TAAR1	134864	Q96RJ0	trace amine associated receptor 1	G-protein coupled receptor	51	0.682	0.423	0.00039183	0.01		1	1	0	2017	2017
Glioblastoma Multiforme	C1621958	CP	1356	P00450	ceruloplasmin	Enzyme	283	0.466	0.846	4.2013e-10	0.01		1	1	0	2001	2001
Glioblastoma Multiforme	C1621958	CPB2	1361	Q96IY4	carboxypeptidase B2	Enzyme	148	0.536	0.846	2.7076e-17	0.01		1	1	0	2013	2013
Glioblastoma Multiforme	C1621958	CLDN4	1364	O14493	claudin 4	Cell-cell junction	164	0.514	0.692	6.9789e-05	0.01		1	1	0	2017	2017
Glioblastoma Multiforme	C1621958	CPN1	1369	P15169	carboxypeptidase N subunit 1		31	0.729	0.423	8.6973e-08	0.01		1	1	0	2019	2019
Glioblastoma Multiforme	C1621958	CPN2	1370	P22792	carboxypeptidase N subunit 2	Receptor	10	0.839	0.192	0.0026009	0.01		1	1	0	2019	2019
Glioblastoma Multiforme	C1621958	CPS1	1373	P31327	carbamoyl-phosphate synthase 1	Enzyme	133	0.59	0.615	1.0947e-09	0.01		1	1	0	2019	2019
Glioblastoma Multiforme	C1621958	CPT1A	1374	P50416	carnitine palmitoyltransferase 1A	Enzyme	143	0.555	0.808	5.114e-09	0.01		1	1	0	2014	2014
Glioblastoma Multiforme	C1621958	TMEM71	137835	Q6P5X7	transmembrane protein 71		8	0.821	0.077	7.986e-11	0.01		1	1	0	2019	2019
Glioblastoma Multiforme	C1621958	CREBBP	1387	Q92793	CREB binding protein		438	0.428	0.808	1	0.01		0	1	0	2013	2013
Glioblastoma Multiforme	C1621958	CRH	1392	P06850	corticotropin releasing hormone	Signaling	402	0.439	0.808	0.71614	0.01		1	1	0	2015	2015
Glioblastoma Multiforme	C1621958	UPRT	139596	Q96BW1	uracil phosphoribosyltransferase homolog		26	0.7	0.462	0.5784	0.01		1	1	0	2004	2004
Glioblastoma Multiforme	C1621958	GATA5	140628	Q9BWX5	GATA binding protein 5		101	0.578	0.615	0.28478	0.01		0	1	0	2014	2014
Glioblastoma Multiforme	C1621958	CTCFL	140690	Q8NI51	CCCTC-binding factor like	Transcription factor	75	0.599	0.692	0.00039547	0.01		0	1	0	2013	2013
Glioblastoma Multiforme	C1621958	RSS	140821		Russell Silver syndrome		103	0.578	0.692		0.01		1	1	0	2018	2018
Glioblastoma Multiforme	C1621958	ROMO1	140823	P60602	reactive oxygen species modulator 1		41	0.666	0.615	0.234	0.01		1	1	0	2015	2015
Glioblastoma Multiforme	C1621958	CRYZ	1429	Q08257	crystallin zeta		145	0.524	0.731	5.6616e-23	0.01		1	1	0	2000	2000
Glioblastoma Multiforme	C1621958	VTI1A	143187	Q96AJ9	vesicle transport through interaction with t-SNAREs 1A	Transporter	37	0.674	0.154	0.00054173	0.01		1	1	1	2015	2015
Glioblastoma Multiforme	C1621958	CSE1L	1434	P55060	chromosome segregation 1 like	Enzyme modulator	163	0.521	0.808	1	0.01		1	1	0	2013	2013
Glioblastoma Multiforme	C1621958	PIWIL4	143689	Q7Z3Z4	piwi like RNA-mediated gene silencing 4		83	0.579	0.692	1.8323e-06	0.01		1	1	0	2017	2017
Glioblastoma Multiforme	C1621958	CSHL1	1444	Q14406	chorionic somatomammotropin hormone like 1	Signaling	49	0.647	0.577	3.0815e-12	0.01		1	1	0	2013	2013
Glioblastoma Multiforme	C1621958	CSNK1E	1454	P49674	casein kinase 1 epsilon		61	0.619	0.615	0.99926	0.01		1	1	0	2018	2018
Glioblastoma Multiforme	C1621958	CSNK2A1	1457	P68400	casein kinase 2 alpha 1	Kinase	87	0.597	0.731	0.98711	0.01		1	1	0	2013	2013
Glioblastoma Multiforme	C1621958	CSNK2A2	1459	P19784	casein kinase 2 alpha 2	Kinase	49	0.644	0.577	0.9994	0.01		1	1	0	2015	2015
Glioblastoma Multiforme	C1621958	IL34	146433	Q6ZMJ4	interleukin 34		103	0.56	0.769	0.55444	0.01		1	1	0	2013	2013
Glioblastoma Multiforme	C1621958	CST3	1471	P01034	cystatin C		370	0.436	0.808	0.0039011	0.01		1	1	0	2002	2002
Glioblastoma Multiforme	C1621958	APCDD1	147495	Q8J025	APC down-regulated 1		54	0.644	0.538	0.0073159	0.01		1	1	0	2018	2018
Glioblastoma Multiforme	C1621958	DIRAS1	148252	O95057	DIRAS family GTPase 1	Enzyme modulator	20	0.722	0.231	0.388	0.01		1	1	0	1997	1997
Glioblastoma Multiforme	C1621958	CTAA1	1483		cataract, anterior polar 1		106	0.568	0.731		0.01		1	1	0	2017	2017
Glioblastoma Multiforme	C1621958	CTBP1	1487	Q13363	C-terminal binding protein 1	Transcription factor	154	0.559	0.692	0.98442	0.01		1	1	0	2019	2019
Glioblastoma Multiforme	C1621958	CTH	1491	P32929	cystathionine gamma-lyase	Enzyme	93	0.578	0.615	7.482e-08	0.01		1	1	0	2015	2015
Glioblastoma Multiforme	C1621958	CTNNA1	1495	P35221	catenin alpha 1	Cellular structure	82	0.584	0.538	0.96962	0.01		1	1	0	1995	1995
Glioblastoma Multiforme	C1621958	CTNND1	1500	O60716	catenin delta 1	Cellular structure	196	0.5	0.808	0.99999	0.01		1	1	0	2019	2019
Glioblastoma Multiforme	C1621958	CTSG	1511	P08311	cathepsin G	Enzyme	95	0.563	0.731	9.5595e-06	0.01		1	1	0	2016	2016
Glioblastoma Multiforme	C1621958	PPP1R1C	151242	Q8WVI7	protein phosphatase 1 regulatory inhibitor subunit 1C	Enzyme modulator	7	0.839	0.077	2.3484e-05	0.01		1	1	0	2017	2017
Glioblastoma Multiforme	C1621958	CTSS	1520	P25774	cathepsin S	Enzyme	131	0.539	0.731	0.34178	0.01		1	1	0	2014	2014
Glioblastoma Multiforme	C1621958	CUX1	1523	P39880;Q13948	cut like homeobox 1	Transcription factor	283	0.465	0.846	1	0.01		1	1	0	2018	2018
Glioblastoma Multiforme	C1621958	CREBRF	153222	Q8IUR6	CREB3 regulatory factor		50	0.636	0.5	0.99997	0.01		1	1	0	2016	2016
Glioblastoma Multiforme	C1621958	CYB561	1534	P49447	cytochrome b561	Enzyme	12	0.78	0.192	0.61092	0.01		1	1	0	1998	1998
Glioblastoma Multiforme	C1621958	CYBB	1536	P04839	cytochrome b-245 beta chain	Ion channel	343	0.452	0.885	0.99904	0.01		1	1	0	2015	2015
Glioblastoma Multiforme	C1621958	CYC1	1537	P08574	cytochrome c1		44	0.656	0.462	0.13875	0.01		1	1	0	2015	2015
Glioblastoma Multiforme	C1621958	CYLD	1540	Q9NQC7	CYLD lysine 63 deubiquitinase	Enzyme	211	0.498	0.846	0.99993	0.01		1	1	0	2016	2016
Glioblastoma Multiforme	C1621958	ABCA13	154664	Q86UQ4	ATP binding cassette subfamily A member 13	Transporter	26	0.722	0.308	8.7753e-114	0.01		1	1	0	2018	2018
Glioblastoma Multiforme	C1621958	CYP2A7	1549	P20853	cytochrome P450 family 2 subfamily A member 7		35	0.686	0.538	3.7792e-15	0.01		1	1	0	2014	2014
Glioblastoma Multiforme	C1621958	CYP2B6	1555	P20813	cytochrome P450 family 2 subfamily B member 6		388	0.428	0.846	1.9303e-10	0.01		1	1	0	2008	2008
Glioblastoma Multiforme	C1621958	GRK3	157	P35626	G protein-coupled receptor kinase 3	Kinase	56	0.621	0.731	0.71059	0.01		1	1	0	2012	2012
Glioblastoma Multiforme	C1621958	CYP2E1	1571	P05181	cytochrome P450 family 2 subfamily E member 1		306	0.459	0.885	8.0688e-09	0.01		1	1	0	2013	2013
Glioblastoma Multiforme	C1621958	FBXO16	157574	Q8IX29	F-box protein 16		7	0.861	0.038	4.6108e-09	0.01		1	1	0	2019	2019
Glioblastoma Multiforme	C1621958	SLC7A13	157724	Q8TCU3	solute carrier family 7 member 13	Transporter	15	0.769	0.192	1.483e-13	0.01		1	1	0	2004	2004
Glioblastoma Multiforme	C1621958	CYP4B1	1580	P13584	cytochrome P450 family 4 subfamily B member 1	Enzyme	35	0.691	0.308	3.2777e-10	0.01		1	1	0	2000	2000
Glioblastoma Multiforme	C1621958	PRUNE2	158471	Q8WUY3	prune homolog 2 with BCH domain		29	0.716	0.346	4.9601e-28	0.01		1	1	0	2017	2017
Glioblastoma Multiforme	C1621958	CYP17A1	1586	P05093	cytochrome P450 family 17 subfamily A member 1		326	0.462	0.769	0.00026255	0.01		1	1	0	2019	2019
Glioblastoma Multiforme	C1621958	CYP27A1	1593	Q02318	cytochrome P450 family 27 subfamily A member 1	Enzyme	167	0.538	0.731	5.2916e-19	0.01		1	1	0	2018	2018
Glioblastoma Multiforme	C1621958	DAB1	1600	O75553	DAB adaptor protein 1	Signaling	81	0.626	0.615	0.99915	0.01		1	1	0	2018	2018
Glioblastoma Multiforme	C1621958	DAPK1	1612	P53355	death associated protein kinase 1	Kinase	249	0.472	0.808	0.99767	0.01		1	1	0	2016	2016
Glioblastoma Multiforme	C1621958	DBH	1621	P09172	dopamine beta-hydroxylase		202	0.511	0.846	3.3352e-10	0.01		1	1	0	1998	1998
Glioblastoma Multiforme	C1621958	SLFN5	162394	Q08AF3	schlafen family member 5		25	0.7	0.269	1.7046e-12	0.01		1	1	0	2017	2017
Glioblastoma Multiforme	C1621958	DBN1	1627	Q16643	drebrin 1	Cellular structure	54	0.633	0.538	0.99705	0.01		1	1	0	2013	2013
Glioblastoma Multiforme	C1621958	DBT	1629	P11182	dihydrolipoamide branched chain transacylase E2	Enzyme	65	0.638	0.462	1.0467e-05	0.01		1	1	0	2010	2010
Glioblastoma Multiforme	C1621958	DCC	1630	P43146	DCC netrin 1 receptor		279	0.471	0.808	0.99448	0.01		1	1	0	1993	1993
Glioblastoma Multiforme	C1621958	DCK	1633	P27707	deoxycytidine kinase	Kinase	102	0.561	0.692	1.545e-05	0.01		1	1	0	2017	2017
Glioblastoma Multiforme	C1621958	ACE	1636	P12821	angiotensin I converting enzyme	Enzyme	1082	0.328	0.923	1.0344e-37	0.01		1	1	0	2004	2004
Glioblastoma Multiforme	C1621958	OXER1	165140	Q8TDS5	oxoeicosanoid receptor 1	G-protein coupled receptor	169	0.529	0.923	7.3192e-08	0.01		1	1	0	2018	2018
Glioblastoma Multiforme	C1621958	DDX3X	1654	O00571	DEAD-box helicase 3 X-linked		180	0.537	0.769	0.99986	0.01		1	1	0	2011	2011
Glioblastoma Multiforme	C1621958	DDX6	1656	P26196	DEAD-box helicase 6		52	0.663	0.385	0.99964	0.01		1	1	0	2016	2016
Glioblastoma Multiforme	C1621958	RNF168	165918	Q8IYW5	ring finger protein 168		64	0.653	0.731	2.0514e-13	0.01		1	1	0	2019	2019
Glioblastoma Multiforme	C1621958	SGMS2	166929	Q8NHU3	sphingomyelin synthase 2		45	0.653	0.538	0.056938	0.01		1	1	0	2019	2019
Glioblastoma Multiforme	C1621958	DFFB	1677	O76075	DNA fragmentation factor subunit beta	Enzyme	28	0.7	0.346	1.1349e-05	0.01		1	1	0	2016	2016
Glioblastoma Multiforme	C1621958	TIMM8A	1678	O60220	translocase of inner mitochondrial membrane 8A		200	0.51	0.846	0.65195	0.01		1	1	0	2018	2018
Glioblastoma Multiforme	C1621958	ZNF596	169270	Q8TC21	zinc finger protein 596	Transcription factor	3	0.89	0.115	1.8321e-13	0.01		1	1	0	2019	2019
Glioblastoma Multiforme	C1621958	AAVS1	17		adeno-associated virus integration site 1		78	0.595	0.731		0.01		1	1	0	2002	2002
Glioblastoma Multiforme	C1621958	XAGE3	170626	Q8WTP9	X antigen family member 3		3	0.89	0.077	0.094852	0.01		1	1	0	2013	2013
Glioblastoma Multiforme	C1621958	DHPS	1725	P49366	deoxyhypusine synthase		62	0.67	0.538	0.00016305	0.01		1	1	0	2012	2012
Glioblastoma Multiforme	C1621958	DIAPH1	1729	O60610	diaphanous related formin 1		71	0.623	0.654	0.91507	0.01		1	1	0	2014	2014
Glioblastoma Multiforme	C1621958	DIO1	1733	P49895	iodothyronine deiodinase 1		51	0.638	0.769	0.58399	0.01		1	1	1	2019	2019
Glioblastoma Multiforme	C1621958	DIO2	1734	Q92813	iodothyronine deiodinase 2		79	0.59	0.731	0.6196	0.01		1	1	1	2019	2019
Glioblastoma Multiforme	C1621958	DLG3	1741	Q92796	discs large MAGUK scaffold protein 3		144	0.544	0.615	0.99999	0.01		1	1	0	2014	2014
Glioblastoma Multiforme	C1621958	DLG4	1742	P78352	discs large MAGUK scaffold protein 4	Receptor	91	0.595	0.654	0.99954	0.01		1	1	0	2014	2014
Glioblastoma Multiforme	C1621958	DLX2	1746	Q07687	distal-less homeobox 2	Transcription factor	34	0.711	0.423	0.97847	0.01		1	1	0	2013	2013
Glioblastoma Multiforme	C1621958	SARDH	1757	Q9UL12	sarcosine dehydrogenase	Enzyme	166	0.523	0.846	5.2689e-16	0.01		1	1	0	2017	2017
Glioblastoma Multiforme	C1621958	DYNC1I1	1780	O14576	dynein cytoplasmic 1 intermediate chain 1	Cellular structure	21	0.76	0.192	1.7637e-07	0.01		1	1	0	2019	2019
Glioblastoma Multiforme	C1621958	DNM2	1785	P50570	dynamin 2	Enzyme modulator	178	0.542	0.769	0.99998	0.01		1	1	0	2019	2019
Glioblastoma Multiforme	C1621958	DPP4	1803	P27487	dipeptidyl peptidase 4	Enzyme	451	0.42	0.808	7.2797e-09	0.01		1	1	0	2019	2019
Glioblastoma Multiforme	C1621958	AGRP	181	O00253	agouti related neuropeptide	Signaling	233	0.488	0.769	0.00069912	0.01		1	1	0	2010	2010
Glioblastoma Multiforme	C1621958	SLC26A3	1811	P40879	solute carrier family 26 member 3	Transporter	128	0.554	0.692	1.3699e-13	0.01		1	1	0	1992	1992
Glioblastoma Multiforme	C1621958	RCAN1	1827	P53805	regulator of calcineurin 1	Signaling	110	0.572	0.808	0.016675	0.01		1	1	0	2006	2006
Glioblastoma Multiforme	C1621958	DVL3	1857	Q92997	dishevelled segment polarity protein 3	Signaling	167	0.537	0.731	0.38544	0.01		1	1	0	2017	2017
Glioblastoma Multiforme	C1621958	E2F2	1870	Q14209	E2F transcription factor 2	Nucleic acid binding	75	0.599	0.692	0.25505	0.01		1	1	0	2016	2016
Glioblastoma Multiforme	C1621958	E2F6	1876	O75461	E2F transcription factor 6	Nucleic acid binding	35	0.67	0.385	0.10158	0.01		1	1	0	2019	2019
Glioblastoma Multiforme	C1621958	GPR183	1880	P32249	G protein-coupled receptor 183	G-protein coupled receptor	30	0.7	0.462	0.017257	0.01		1	1	0	2013	2013
Glioblastoma Multiforme	C1621958	ECE1	1889	P42892	endothelin converting enzyme 1	Enzyme	157	0.541	0.769	0.95987	0.01		1	1	0	2000	2000
Glioblastoma Multiforme	C1621958	AGXT	189	P21549	alanine--glyoxylate and serine--pyruvate aminotransferase	Enzyme	94	0.593	0.731	1.2332e-07	0.01		1	1	0	2004	2004
Glioblastoma Multiforme	C1621958	TYMP	1890	P19971	thymidine phosphorylase	Enzyme	246	0.495	0.769	0.00011694	0.01		1	1	0	2005	2005
Glioblastoma Multiforme	C1621958	ECHS1	1892	P30084	enoyl-CoA hydratase, short chain 1	Enzyme	93	0.601	0.654	0.00087731	0.01		1	1	0	2007	2007
Glioblastoma Multiforme	C1621958	LPAR1	1902	Q92633	lysophosphatidic acid receptor 1	G-protein coupled receptor	145	0.534	0.808	0.18603	0.01		1	1	0	2008	2008
Glioblastoma Multiforme	C1621958	EDN3	1908	P14138	endothelin 3	Signaling	107	0.608	0.577	0.024568	0.01		1	1	0	2011	2011
Glioblastoma Multiforme	C1621958	AHCY	191	P23526	adenosylhomocysteinase	Enzyme	107	0.582	0.692	0.035922	0.01		1	1	0	2009	2009
Glioblastoma Multiforme	C1621958	EFNA2	1943	O43921	ephrin A2	Signaling	34	0.686	0.462	0.038008	0.01		1	1	0	2018	2018
Glioblastoma Multiforme	C1621958	EFNB1	1947	P98172	ephrin B1	Signaling	134	0.561	0.769	0.93251	0.01		1	1	0	2010	2010
Glioblastoma Multiforme	C1621958	EFNB2	1948	P52799	ephrin B2	Signaling	109	0.561	0.692	0.98845	0.01		1	1	0	2010	2010
Glioblastoma Multiforme	C1621958	ANO6	196527	Q4KMQ2	anoctamin 6	Ion channel	22	0.736	0.423	7.3158e-32	0.01		1	1	0	2019	2019
Glioblastoma Multiforme	C1621958	AHSG	197	P02765	alpha 2-HS glycoprotein	Enzyme modulator	204	0.506	0.846	3.209e-10	0.01		1	1	0	2016	2016
Glioblastoma Multiforme	C1621958	EIF4G2	1982	P78344	eukaryotic translation initiation factor 4 gamma 2	Nucleic acid binding	75	0.593	0.692	1	0.01		1	1	0	2019	2019
Glioblastoma Multiforme	C1621958	SERPINB1	1992	P30740	serpin family B member 1	Enzyme modulator	41	0.663	0.731	3.5486e-08	0.01		1	1	0	2015	2015
Glioblastoma Multiforme	C1621958	ELAVL1	1994	Q15717	ELAV like RNA binding protein 1		103	0.56	0.731	0.98849	0.01		1	1	0	2001	2001
Glioblastoma Multiforme	C1621958	TXLNA	200081	P40222	taxilin alpha	Immune response	23	0.716	0.385	0.99731	0.01		1	1	0	2017	2017
Glioblastoma Multiforme	C1621958	APOBEC3A	200315	P31941	apolipoprotein B mRNA editing enzyme catalytic subunit 3A		68	0.612	0.692	0.0010454	0.01		1	1	0	2015	2015
Glioblastoma Multiforme	C1621958	ELK4	2005	P28324	ETS transcription factor ELK4	Transcription factor	32	0.674	0.423	0.0034071	0.01		1	1	0	2011	2011
Glioblastoma Multiforme	C1621958	ELN	2006	P15502	elastin		545	0.415	0.885	2.1429e-14	0.01		1	1	0	2019	2019
Glioblastoma Multiforme	C1621958	PDE12	201626	Q6L8Q7	phosphodiesterase 12	Enzyme	6	0.861	0.038	0.044374	0.01		1	1	0	2007	2007
Glioblastoma Multiforme	C1621958	TIGIT	201633	Q495A1	T cell immunoreceptor with Ig and ITIM domains		56	0.623	0.538	0.017915	0.01		1	1	0	2018	2018
Glioblastoma Multiforme	C1621958	ENDOG	2021	Q14249	endonuclease G		38	0.656	0.5	0.00018287	0.01		1	1	0	2010	2010
Glioblastoma Multiforme	C1621958	ENO1	2023	P06733	enolase 1	Enzyme	231	0.481	0.885	1.914e-05	0.01		1	1	0	2012	2012
Glioblastoma Multiforme	C1621958	CMYA5	202333	Q8N3K9	cardiomyopathy associated 5		22	0.711	0.423	1.3454e-54	0.01		1	1	0	2019	2019
Glioblastoma Multiforme	C1621958	ENO2	2026	P09104	enolase 2	Enzyme	239	0.475	0.846	0.38396	0.01		1	1	0	2012	2012
Glioblastoma Multiforme	C1621958	ENPEP	2028	Q07075	glutamyl aminopeptidase	Enzyme	117	0.564	0.731	1.3878e-28	0.01		1	1	0	2014	2014
Glioblastoma Multiforme	C1621958	PRSS55	203074	Q6UWB4	serine protease 55	Enzyme	163	0.513	0.769	3.1731e-11	0.01		1	1	0	2018	2018
Glioblastoma Multiforme	C1621958	EP300	2033	Q09472	E1A binding protein p300		345	0.459	0.846	1	0.01		1	1	0	2011	2011
Glioblastoma Multiforme	C1621958	EPHB4	2050	P54760	EPH receptor B4	Kinase	157	0.524	0.692	0.013497	0.01		0	1	0	2011	2011
Glioblastoma Multiforme	C1621958	EPOR	2057	P19235	erythropoietin receptor	Receptor	162	0.526	0.692	0.0101	0.01		1	1	0	2014	2014
Glioblastoma Multiforme	C1621958	ERCC2	2068	P18074	ERCC excision repair 2, TFIIH core complex helicase subunit	Enzyme	499	0.42	0.846	7.0654e-20	0.01		1	1	1	2014	2014
Glioblastoma Multiforme	C1621958	EREG	2069	O14944	epiregulin	Signaling	121	0.554	0.692	1.1659e-05	0.01		1	1	0	2013	2013
Glioblastoma Multiforme	C1621958	ERG	2078	P11308	ETS transcription factor ERG	Transcription factor	298	0.453	0.808	0.96413	0.01		1	1	0	1995	1995
Glioblastoma Multiforme	C1621958	ESD	2098	P10768	esterase D	Enzyme	48	0.656	0.615	5.3945e-07	0.01		1	1	0	1988	1988
Glioblastoma Multiforme	C1621958	ETFA	2108	P13804	electron transfer flavoprotein subunit alpha	Enzyme	195	0.508	0.731	0.0029217	0.01		1	1	1	2015	2015
Glioblastoma Multiforme	C1621958	ETV2	2116	O00321	ETS variant transcription factor 2	Transcription factor	15	0.792	0.154	2.6344e-09	0.01		1	1	0	2018	2018
Glioblastoma Multiforme	C1621958	ETV4	2118	P43268	ETS variant transcription factor 4	Transcription factor	120	0.545	0.5	2.8688e-08	0.01		1	1	0	2001	2001
Glioblastoma Multiforme	C1621958	F2	2147	P00734	coagulation factor II, thrombin	Enzyme	490	0.415	0.885	0.0011118	0.01		0	1	0	2019	2019
Glioblastoma Multiforme	C1621958	F9	2158	P00740	coagulation factor IX	Enzyme	276	0.465	0.885	0.99776	0.01		1	1	0	2018	2018
Glioblastoma Multiforme	C1621958	FABP4	2167	P15090	fatty acid binding protein 4		194	0.5	0.808	5.1764e-05	0.01		1	1	0	2018	2018
Glioblastoma Multiforme	C1621958	FABP5	2171	Q01469	fatty acid binding protein 5		85	0.585	0.731	0.047008	0.01		1	1	0	2015	2015
Glioblastoma Multiforme	C1621958	FANCA	2175	O15360	FA complementation group A		211	0.505	0.731	1.5943e-68	0.01		1	1	0	2019	2019
Glioblastoma Multiforme	C1621958	FOLH1B	219595	Q9HBA9	folate hydrolase 1B	Enzyme	36	0.682	0.538		0.01		1	1	0	2015	2015
Glioblastoma Multiforme	C1621958	SKA1	220134	Q96BD8	spindle and kinetochore associated complex subunit 1		42	0.65	0.462	1.7022e-05	0.01		1	1	0	2015	2015
Glioblastoma Multiforme	C1621958	HEPACAM	220296	Q14CZ8	hepatic and glial cell adhesion molecule		70	0.621	0.5	0.86791	0.01		1	1	0	2009	2009
Glioblastoma Multiforme	C1621958	FBP1	2203	P09467	fructose-bisphosphatase 1	Enzyme	125	0.575	0.692	0.079124	0.01		1	1	0	2020	2020
Glioblastoma Multiforme	C1621958	FCGR2A	2212	P12318	Fc fragment of IgG receptor IIa	Cell adhesion	227	0.48	0.769	2.0054e-06	0.01		1	1	0	2018	2018
Glioblastoma Multiforme	C1621958	KDM1B	221656	Q8NB78	lysine demethylase 1B	Epigenetic regulator	22	0.736	0.385	0.0014005	0.01		1	1	0	2016	2016
Glioblastoma Multiforme	C1621958	FCGRT	2217	P55899	Fc fragment of IgG receptor and transporter		102	0.563	0.654	0.041493	0.01		1	1	0	1987	1987
Glioblastoma Multiforme	C1621958	FDFT1	2222	P37268	farnesyl-diphosphate farnesyltransferase 1		62	0.621	0.615	4.0998e-15	0.01		1	1	0	2018	2018
Glioblastoma Multiforme	C1621958	GPRC6A	222545	Q5T6X5	G protein-coupled receptor class C group 6 member A	G-protein coupled receptor	173	0.526	0.923	5.5919e-17	0.01		1	1	0	2018	2018
Glioblastoma Multiforme	C1621958	SLC35F1	222553	Q5T1Q4	solute carrier family 35 member F1	Transporter	13	0.805	0.154	0.95133	0.01		1	1	0	2019	2019
Glioblastoma Multiforme	C1621958	SEMA3D	223117	O95025	semaphorin 3D	Signaling	44	0.678	0.423	4.0219e-08	0.01		1	1	0	2012	2012
Glioblastoma Multiforme	C1621958	FDXR	2232	P22570	ferredoxin reductase	Enzyme	103	0.566	0.808	1.1493e-06	0.01		1	1	0	1996	1996
Glioblastoma Multiforme	C1621958	FECH	2235	P22830	ferrochelatase	Enzyme	88	0.585	0.577	0.0027587	0.01		1	1	0	2011	2011
Glioblastoma Multiforme	C1621958	FEN1	2237	P39748	flap structure-specific endonuclease 1	Enzyme	113	0.55	0.731	4.7743e-05	0.01		1	1	0	2009	2009
Glioblastoma Multiforme	C1621958	FER	2241	P16591	FER tyrosine kinase	Kinase	64	0.628	0.615	0.6633	0.01		1	1	0	2017	2017
Glioblastoma Multiforme	C1621958	FGF1	2246	P05230	fibroblast growth factor 1	Signaling	184	0.507	0.846	0.44406	0.01		1	1	0	2016	2016
Glioblastoma Multiforme	C1621958	FGF5	2250	P12034	fibroblast growth factor 5	Signaling	56	0.641	0.5	2.0811e-10	0.01		1	1	0	2008	2008
Glioblastoma Multiforme	C1621958	FGF7	2252	P21781	fibroblast growth factor 7	Signaling	167	0.519	0.846	0.77089	0.01		1	1	0	2013	2013
Glioblastoma Multiforme	C1621958	FGF9	2254	P31371	fibroblast growth factor 9	Signaling	153	0.528	0.846	0.94704	0.01		1	1	0	1998	1998
Glioblastoma Multiforme	C1621958	FGFR2	2263	P21802	fibroblast growth factor receptor 2	Kinase	731	0.38	0.808	0.99731	0.01		1	1	0	2014	2014
Glioblastoma Multiforme	C1621958	FHL1	2273	Q13642	four and a half LIM domains 1		195	0.532	0.731	0.96979	0.01		1	1	0	2000	2000
Glioblastoma Multiforme	C1621958	FHL2	2274	Q14192	four and a half LIM domains 2	Transcription factor	121	0.556	0.731	2.8693e-05	0.01		1	1	0	2018	2018
Glioblastoma Multiforme	C1621958	CHSY1	22856	Q86X52	chondroitin sulfate synthase 1	Enzyme	91	0.612	0.615	0.70781	0.01		1	1	0	2010	2010
Glioblastoma Multiforme	C1621958	CILK1	22858	Q9UPZ9	ciliogenesis associated kinase 1	Kinase	142	0.545	0.808	1.3376e-05	0.01		1	1	0	2010	2010
Glioblastoma Multiforme	C1621958	CD93	22918	Q9NPY3	CD93 molecule	Calcium-binding protein	36	0.663	0.5	1.9782e-10	0.01		1	1	0	2015	2015
Glioblastoma Multiforme	C1621958	ATF6	22926	P18850	activating transcription factor 6		179	0.516	0.846	3.2333e-07	0.01		1	1	0	2016	2016
Glioblastoma Multiforme	C1621958	SIRT2	22933	Q8IXJ6	sirtuin 2	Epigenetic regulator	172	0.51	0.769	2.3295e-08	0.01		1	1	0	2018	2018
Glioblastoma Multiforme	C1621958	ELL2	22936	O00472	elongation factor for RNA polymerase II 2	Cell-cell junction	22	0.722	0.269	0.99824	0.01		1	1	0	2017	2017
Glioblastoma Multiforme	C1621958	DKK1	22943	O94907	dickkopf WNT signaling pathway inhibitor 1		372	0.439	0.885	0.17423	0.01		1	1	0	2010	2010
Glioblastoma Multiforme	C1621958	CCT5	22948	P48643	chaperonin containing TCP1 subunit 5	Chaperone	50	0.663	0.462	0.99928	0.01		1	1	0	2019	2019
Glioblastoma Multiforme	C1621958	FOXD1	2297	Q16676	forkhead box D1	Transcription factor	49	0.636	0.462	0.68874	0.01		1	1	0	2017	2017
Glioblastoma Multiforme	C1621958	TPX2	22974	Q9ULW0	TPX2 microtubule nucleation factor	Cellular structure	122	0.541	0.692	0.99981	0.01		1	1	0	2014	2014
Glioblastoma Multiforme	C1621958	KDM2A	22992	Q9Y2K7	lysine demethylase 2A		53	0.636	0.423	1	0.01		1	1	0	2019	2019
Glioblastoma Multiforme	C1621958	DAAM1	23002	Q9Y4D1	dishevelled associated activator of morphogenesis 1		29	0.682	0.423	0.99918	0.01		1	1	0	2018	2018
Glioblastoma Multiforme	C1621958	FOXC2	2303	Q99958	forkhead box C2	Transcription factor	168	0.515	0.731	0.13356	0.01		1	1	0	2013	2013
Glioblastoma Multiforme	C1621958	WDTC1	23038	Q8N5D0	WD and tetratricopeptide repeats 1	Enzyme modulator	28	0.691	0.5	0.99915	0.01		1	1	0	2017	2017
Glioblastoma Multiforme	C1621958	SWAP70	23075	Q9UH65	switching B cell complex subunit SWAP70	Nucleic acid binding	31	0.736	0.385	0.049628	0.01		1	1	0	2019	2019
Glioblastoma Multiforme	C1621958	ARHGAP26	23092	Q9UNA1	Rho GTPase activating protein 26	Enzyme modulator	47	0.656	0.5	0.99661	0.01		1	1	0	2015	2015
Glioblastoma Multiforme	C1621958	AKR1B1	231	P15121	aldo-keto reductase family 1 member B	Enzyme	220	0.491	0.885	2.0216e-05	0.01		1	1	0	1996	1996
Glioblastoma Multiforme	C1621958	MAST2	23139	Q6P0Q8	microtubule associated serine/threonine kinase 2	Kinase	22	0.76	0.192	1.7079e-19	0.01		1	1	0	2013	2013
Glioblastoma Multiforme	C1621958	SSPO	23145	A2VEC9	SCO-spondin	Enzyme modulator	9	0.805	0.154		0.01		1	1	0	2017	2017
Glioblastoma Multiforme	C1621958	STAB1	23166	Q9NY15	stabilin 1		69	0.619	0.692	8.6792e-50	0.01		1	1	0	2013	2013
Glioblastoma Multiforme	C1621958	FLNB	2317	O75369	filamin B		374	0.458	0.923	6.0505e-10	0.01		1	1	0	2013	2013
Glioblastoma Multiforme	C1621958	FLNC	2318	Q14315	filamin C		132	0.568	0.615	0.99994	0.01		1	1	0	2019	2019
Glioblastoma Multiforme	C1621958	DIP2A	23181	Q14689	disco interacting protein 2 homolog A		18	0.76	0.231	0.11301	0.01		1	1	0	2019	2019
Glioblastoma Multiforme	C1621958	RCOR1	23186	Q9UKL0	REST corepressor 1		36	0.678	0.577	0.99992	0.01		1	1	0	2017	2017
Glioblastoma Multiforme	C1621958	ATG4B	23192	Q9Y4P1	autophagy related 4B cysteine peptidase	Enzyme	49	0.644	0.538	0.95648	0.01		1	1	0	2017	2017
Glioblastoma Multiforme	C1621958	JMJD6	23210	Q6NYC1	jumonji domain containing 6, arginine demethylase and lysine hydroxylase	Receptor	73	0.615	0.654	0.93353	0.01		1	1	0	2017	2017
Glioblastoma Multiforme	C1621958	SULF1	23213	Q8IWU6	sulfatase 1	Enzyme	83	0.585	0.538	0.0013751	0.01		1	1	0	2015	2015
Glioblastoma Multiforme	C1621958	PLCB1	23236	Q9NQ66	phospholipase C beta 1	Enzyme	107	0.595	0.654	0.98337	0.01		1	1	0	2016	2016
Glioblastoma Multiforme	C1621958	FLT4	2324	P35916	fms related receptor tyrosine kinase 4	Kinase	306	0.457	0.808	1	0.01		1	1	0	2017	2017
Glioblastoma Multiforme	C1621958	ATMIN	23300	O43313	ATM interactor		17	0.751	0.346	5.031e-05	0.01		1	1	0	2016	2016
Glioblastoma Multiforme	C1621958	SIN3B	23309	O75182	SIN3 transcription regulator family member B	Enzyme	21	0.743	0.308	0.99999	0.01		1	1	0	2012	2012
Glioblastoma Multiforme	C1621958	NEDD4L	23327	Q96PU5	NEDD4 like E3 ubiquitin protein ligase	Enzyme	108	0.573	0.731	1	0.01		1	1	0	2019	2019
Glioblastoma Multiforme	C1621958	SYNM	23336	O15061	synemin		93	0.575	0.731	3.0339e-24	0.01		1	1	0	2012	2012
Glioblastoma Multiforme	C1621958	SYNE1	23345	Q8NF91	spectrin repeat containing nuclear envelope protein 1		237	0.511	0.846	3.1899e-52	0.01		0	1	0	2011	2011
Glioblastoma Multiforme	C1621958	DOCK9	23348	Q9BZ29	dedicator of cytokinesis 9	Enzyme modulator	14	0.769	0.192	1	0.01		1	1	0	2012	2012
Glioblastoma Multiforme	C1621958	HAUS5	23354	O94927	HAUS augmin like complex subunit 5		4	0.861	0.038	3.2819e-10	0.01		1	1	0	2017	2017
Glioblastoma Multiforme	C1621958	PPP1R13B	23368	Q96KQ4	protein phosphatase 1 regulatory subunit 13B	Enzyme modulator	70	0.599	0.692	0.99811	0.01		1	1	0	2008	2008
Glioblastoma Multiforme	C1621958	PUM2	23369	Q8TB72	pumilio RNA binding family member 2	Nucleic acid binding	17	0.743	0.154	0.99492	0.01		1	1	0	2019	2019
Glioblastoma Multiforme	C1621958	TNS2	23371	Q63HR2	tensin 2		12	0.769	0.423	3.7043e-07	0.01		1	1	0	2012	2012
Glioblastoma Multiforme	C1621958	SIRT5	23408	Q9NXA8	sirtuin 5	Epigenetic regulator	63	0.61	0.615	8.6584e-10	0.01		1	1	0	2019	2019
Glioblastoma Multiforme	C1621958	RYBP	23429	Q8N488	RING1 and YY1 binding protein	Transcription factor	33	0.686	0.269	0.17721	0.01		1	1	0	2019	2019
Glioblastoma Multiforme	C1621958	TARDBP	23435	Q13148	TAR DNA binding protein		245	0.493	0.808	0.98542	0.01		1	1	0	2017	2017
Glioblastoma Multiforme	C1621958	HARS2	23438	P49590	histidyl-tRNA synthetase 2, mitochondrial	Enzyme	25	0.705	0.462	2.7868e-05	0.01		1	1	0	2016	2016
Glioblastoma Multiforme	C1621958	ANGPTL2	23452	Q9UKU9	angiopoietin like 2	Signaling	125	0.545	0.731	0.0014712	0.01		1	1	0	2011	2011
Glioblastoma Multiforme	C1621958	CBX6	23466	O95503	chromobox 6	Epigenetic regulator	8	0.861	0.115	0.97568	0.01		1	1	0	2013	2013
Glioblastoma Multiforme	C1621958	TRAM1	23471	Q15629	translocation associated membrane protein 1		74	0.608	0.654	0.92506	0.01		1	1	0	2015	2015
Glioblastoma Multiforme	C1621958	SEC61G	23480	P60059	SEC61 translocon subunit gamma		7	0.805	0.154	0.63104	0.01		1	1	0	2019	2019
Glioblastoma Multiforme	C1621958	TNFRSF13B	23495	O14836	TNF receptor superfamily member 13B		137	0.558	0.769	2.0908e-15	0.01		1	1	0	2018	2018
Glioblastoma Multiforme	C1621958	SRRM2	23524	Q9UQ35	serine/arginine repetitive matrix 2		101	0.564	0.692	1	0.01		1	1	0	2015	2015
Glioblastoma Multiforme	C1621958	SEC14L2	23541	O76054	SEC14 like lipid binding 2		198	0.494	0.885	2.9195e-08	0.01		1	1	0	2013	2013
Glioblastoma Multiforme	C1621958	MAPK8IP2	23542	Q13387	mitogen-activated protein kinase 8 interacting protein 2	Signaling	51	0.628	0.654	0.99997	0.01		1	1	0	2020	2020
Glioblastoma Multiforme	C1621958	ATP6V0A2	23545	Q9Y487	ATPase H+ transporting V0 subunit a2	Transporter	158	0.57	0.692	2.6314e-11	0.01		1	1	0	2006	2006
Glioblastoma Multiforme	C1621958	WBP2	23558	Q969T9	WW domain binding protein 2		23	0.722	0.269	0.34916	0.01		1	1	0	2018	2018
Glioblastoma Multiforme	C1621958	LPAR3	23566	Q9UBY5	lysophosphatidic acid receptor 3	G-protein coupled receptor	194	0.509	0.923	0.67935	0.01		1	1	0	2018	2018
Glioblastoma Multiforme	C1621958	DDX58	23586	O95786	DExD/H-box helicase 58		144	0.526	0.808	1.7558e-23	0.01		1	1	0	2013	2013
Glioblastoma Multiforme	C1621958	PATZ1	23598	Q9HBE1	POZ/BTB and AT hook containing zinc finger 1		50	0.647	0.423	0.99598	0.01		1	1	0	2017	2017
Glioblastoma Multiforme	C1621958	DAPK2	23604	Q9UIK4	death associated protein kinase 2	Kinase	130	0.536	0.692	5.0088e-10	0.01		1	1	0	2014	2014
Glioblastoma Multiforme	C1621958	LY96	23643	Q9Y6Y9	lymphocyte antigen 96	Receptor	54	0.636	0.615	7.4167e-05	0.01		1	1	0	2009	2009
Glioblastoma Multiforme	C1621958	PPP1R15A	23645	O75807	protein phosphatase 1 regulatory subunit 15A		65	0.608	0.692	2.206e-12	0.01		1	1	0	2018	2018
Glioblastoma Multiforme	C1621958	SMPX	23676	Q9UHP9	small muscle protein X-linked		37	0.682	0.5	0.62317	0.01		1	1	0	2013	2013
Glioblastoma Multiforme	C1621958	SH3BP4	23677	Q9P0V3	SH3 domain binding protein 4		74	0.593	0.692	0.0025338	0.01		1	1	0	2013	2013
Glioblastoma Multiforme	C1621958	SGK3	23678	Q96BR1	serum/glucocorticoid regulated kinase family member 3		36	0.674	0.654	8.5621e-07	0.01		1	1	0	2015	2015
Glioblastoma Multiforme	C1621958	CADM1	23705	Q9BY67	cell adhesion molecule 1		205	0.491	0.769	0.66216	0.01		1	1	0	2013	2013
Glioblastoma Multiforme	C1621958	BCL2L13	23786	Q9BXK5	BCL2 like 13		18	0.78	0.308	0.0024411	0.01		1	1	0	2014	2014
Glioblastoma Multiforme	C1621958	KIF4A	24137	O95239	kinesin family member 4A	Cellular structure	50	0.647	0.462	0.99998	0.01		1	1	0	2019	2019
Glioblastoma Multiforme	C1621958	ALOX15	246	P16050	arachidonate 15-lipoxygenase	Enzyme	205	0.502	0.846	1.1397e-23	0.01		1	1	0	2011	2011
Glioblastoma Multiforme	C1621958	FTH1	2495	P02794	ferritin heavy chain 1	Storage	107	0.559	0.731	0.13999	0.01		1	1	0	2019	2019
Glioblastoma Multiforme	C1621958	FTL	2512	P02792	ferritin light chain	Storage	135	0.559	0.692	1.6617e-09	0.01		1	1	0	2016	2016
Glioblastoma Multiforme	C1621958	GAST	2520	P01350	gastrin		236	0.485	0.808	0.0027394	0.01		1	1	0	2001	2001
Glioblastoma Multiforme	C1621958	FYN	2534	P06241	FYN proto-oncogene, Src family tyrosine kinase	Kinase	116	0.556	0.731	0.99406	0.01		0	1	0	2005	2005
Glioblastoma Multiforme	C1621958	FZD2	2535	Q14332	frizzled class receptor 2	G-protein coupled receptor	139	0.558	0.654	0.65266	0.01		1	1	0	2014	2014
Glioblastoma Multiforme	C1621958	EBF3	253738	Q9H4W6	EBF transcription factor 3		124	0.595	0.731	0.99993	0.01		1	1	0	2015	2015
Glioblastoma Multiforme	C1621958	IGFBP7-AS1	255130		IGFBP7 antisense RNA 1		6	0.839	0.038		0.01		1	1	0	2019	2019
Glioblastoma Multiforme	C1621958	MCOLN2	255231	Q8IZK6	mucolipin 2	Ion channel	10	0.805	0.192	1.2502e-14	0.01		1	1	0	2016	2016
Glioblastoma Multiforme	C1621958	GABPB1	2553	Q06547	GA binding protein transcription factor subunit beta 1		16	0.743	0.346	0.91121	0.01		1	1	0	2019	2019
Glioblastoma Multiforme	C1621958	GABRA1	2554	P14867	gamma-aminobutyric acid type A receptor subunit alpha1	Ion channel	123	0.563	0.577	0.91489	0.01		1	1	0	2012	2012
Glioblastoma Multiforme	C1621958	GK5	256356	Q6ZS86	glycerol kinase 5	Kinase	15	0.743	0.192	0.0063366	0.01		1	1	0	2015	2015
Glioblastoma Multiforme	C1621958	ANKS4B	257629	Q8N8V4	ankyrin repeat and sterile alpha motif domain containing 4B		15	0.743	0.385	1.4867e-05	0.01		1	1	0	2011	2011
Glioblastoma Multiforme	C1621958	RASGRP3	25780	Q8IV61	RAS guanyl releasing protein 3	Enzyme modulator	34	0.686	0.5	0.0091132	0.01		1	1	0	2015	2015
Glioblastoma Multiforme	C1621958	B4GALNT1	2583	Q00973	beta-1,4-N-acetyl-galactosaminyltransferase 1		67	0.644	0.615	3.9259e-05	0.01		1	1	0	2006	2006
Glioblastoma Multiforme	C1621958	HECTD1	25831	Q9ULT8	HECT domain E3 ubiquitin protein ligase 1		14	0.751	0.385	1	0.01		1	1	0	2017	2017
Glioblastoma Multiforme	C1621958	PRKD2	25865	Q9BZL6	protein kinase D2	Kinase	40	0.666	0.538	0.99995	0.01		1	1	0	2013	2013
Glioblastoma Multiforme	C1621958	MPC2	25874	O95563	mitochondrial pyruvate carrier 2	Transporter	16	0.743	0.308	0.63515	0.01		1	1	0	2018	2018
Glioblastoma Multiforme	C1621958	NCR3	259197	O14931	natural cytotoxicity triggering receptor 3		53	0.638	0.769	0.00036824	0.01		1	1	0	2012	2012
Glioblastoma Multiforme	C1621958	SGMS1	259230	Q86VZ5	sphingomyelin synthase 1		39	0.674	0.577	0.94507	0.01		1	1	0	2019	2019
Glioblastoma Multiforme	C1621958	MYRIP	25924	Q8NFW9	myosin VIIA and Rab interacting protein	Cellular structure	11	0.805	0.154	7.2179e-06	0.01		1	1	0	2014	2014
Glioblastoma Multiforme	C1621958	MRGPRX1	259249	Q96LB2	MAS related GPR family member X1	G-protein coupled receptor	166	0.531	0.923		0.01		1	1	0	2018	2018
Glioblastoma Multiforme	C1621958	RWDD3	25950	Q9Y3V2	RWD domain containing 3		18	0.751	0.269	0.0014761	0.01		1	1	0	2018	2018
Glioblastoma Multiforme	C1621958	ADGRA2	25960	Q96PE1	adhesion G protein-coupled receptor A2	G-protein coupled receptor	22	0.743	0.308	5.4955e-08	0.01		1	1	0	2019	2019
Glioblastoma Multiforme	C1621958	ULK3	25989	Q6PHR2	unc-51 like kinase 3	Kinase	10	0.839	0.115	0.0020258	0.01		1	1	0	2014	2014
Glioblastoma Multiforme	C1621958	SNED1	25992	Q8TER0	sushi, nidogen and EGF like domains 1		34	0.686	0.462	0.66246	0.01		1	1	0	2002	2002
Glioblastoma Multiforme	C1621958	CHD5	26038	Q8TDI0	chromodomain helicase DNA binding protein 5		64	0.604	0.5	1	0.01		1	1	0	2018	2018
Glioblastoma Multiforme	C1621958	DNM3	26052	Q9UQ16	dynamin 3	Enzyme modulator	48	0.716	0.462	0.0024197	0.01		1	1	0	2017	2017
Glioblastoma Multiforme	C1621958	RAI14	26064	Q9P0K7	retinoic acid induced 14		18	0.751	0.269	0.99122	0.01		1	1	0	2019	2019
Glioblastoma Multiforme	C1621958	ZBTB20	26137	Q9HC78	zinc finger and BTB domain containing 20		139	0.566	0.731	0.97382	0.01		1	1	0	2018	2018
Glioblastoma Multiforme	C1621958	PHF19	26147	Q5T6S3	PHD finger protein 19	Nucleic acid binding	28	0.716	0.385	0.99946	0.01		1	1	0	2018	2018
Glioblastoma Multiforme	C1621958	DGCR5	26220		DiGeorge syndrome critical region gene 5		45	0.65	0.577		0.01		1	1	0	2019	2019
Glioblastoma Multiforme	C1621958	GATA2	2624	P23769	GATA binding protein 2		229	0.496	0.654	0.97927	0.01		1	1	0	2015	2015
Glioblastoma Multiforme	C1621958	TSPAN17	26262	Q96FV3	tetraspanin 17		2	1	0.038	1.511e-06	0.01		1	1	0	2019	2019
Glioblastoma Multiforme	C1621958	FBXO3	26273	Q9UK99	F-box protein 3		19	0.743	0.462	0.98916	0.01		1	1	0	2011	2011
Glioblastoma Multiforme	C1621958	GCH1	2643	P30793	GTP cyclohydrolase 1	Enzyme	254	0.511	0.846	0.90292	0.01		1	1	0	2018	2018
Glioblastoma Multiforme	C1621958	NUPR1	26471	O60356	nuclear protein 1, transcriptional regulator		68	0.606	0.615	0.0041502	0.01		1	1	0	2017	2017
Glioblastoma Multiforme	C1621958	PLEK2	26499	Q9NYT0	pleckstrin 2	Cellular structure	20	0.729	0.231	5.2858e-09	0.01		1	1	0	2019	2019
Glioblastoma Multiforme	C1621958	GDF2	2658	Q9UK05	growth differentiation factor 2	Signaling	152	0.529	0.731	0.0024656	0.01		1	1	0	2018	2018
Glioblastoma Multiforme	C1621958	AMH	268	P03971	anti-Mullerian hormone		242	0.476	0.846	3.3974e-12	0.01		1	1	0	2008	2008
Glioblastoma Multiforme	C1621958	SNORD48	26801		small nucleolar RNA, C/D box 48		11	0.792	0.154		0.01		1	1	0	2016	2016
Glioblastoma Multiforme	C1621958	RNU6-1	26827		RNA, U6 small nuclear 1		3	0.89	0.077		0.01		1	1	0	2014	2014
[truncated: 5,561 more rows]
