# Supplementary material for: Integrating Multi-Omics Analysis for Enhanced Diagnosis and Treatment of Glioblastoma: A Comprehensive Data-Driven Approach
Source: Preprints.org preprint supplement (doi:10.20944/preprints202303.0355.v1), 2023-03-20
Supplement: Supplementary file 22 [file Supplementary Table 4.xlsx]

## Sheet: Sheet1
Betweenness unDir	gene name	Bridging unDir	gene name	Centroid unDir	gene name	Closeness unDir	gene name	Degree unDir	gene name	Eccentricity unDir	gene name	EigenVector unDir	gene name
351430	UBC	118.533	SMIM10L2A	6604	LUZP6	0.000113999	UBC	4990	UBC	0.333333	UBC	0.0588342	UBC
51793.2	APP	21.938	ZFP57	-6604	SMIM10L2A	9.03832e-05	FN1	2594	FN1	0.333333	AUTS2	0.03449	AUTS2
40564.1	FN1	17.8563	UGT2B17	-6604	ZFP57	9.03261e-05	AUTS2	2569	APP	0.333333	CAST	0.0340157	CAST
38819.3	KCNIP4	17.2934	TDRP	-6604	UGT2B17	9.03016e-05	APP	2336	CELF2	0.333333	CELF2	0.0338359	CELF2
38006.6	AUTS2	16.2492	IL31	-6604	TDRP	8.99766e-05	CAST	2319	EGFR	0.333333	FN1	0.0338066	FN1
34795.8	CAST	16.0808	UGT8	-6604	IL31	8.97827e-05	KCNIP4	2318	CAST	0.333333	KCNIP4	0.0328559	KCNIP4
33349.2	NTRK2	15.9514	MRPL23	-6604	UGT8	8.97505e-05	CELF2	2301	AUTS2	0.333333	APP	0.032452	APP
33126.5	CELF2	15.1794	COX6B2	-6604	MRPL23	8.89284e-05	NTRK2	2270	JUN	0.333333	NTRK2	0.031459	NTRK2
33101.7	CDH13	15.1526	XRRA1	-6604	COX6B2	8.87469e-05	CDH13	2269	CTNNB1	0.333333	NFIA	0.0311311	NFIA
32379.3	DAB1	14.546	UGT2B15	-6604	XRRA1	8.86839e-05	RBFOX1	2234	PIK3R1	0.333333	RBFOX1	0.0311242	RBFOX1
32086.2	RBFOX1	14.4462	RPL41	-6604	UGT2B15	8.86132e-05	NFIA	2207	PPP3CA	0.333333	NFIB	0.0311211	NFIB
31239.3	RDX	14.4385	CMTM1	-6604	RPL41	8.85897e-05	NFIB	2203	KCNIP4	0.333333	CDH13	0.0310587	CDH13
31085.1	NFIA	13.8053	KCNK18	-6604	CMTM1	8.84799e-05	RDX	2170	NTRK2	0.333333	PPP3CA	0.0309178	PPP3CA
30922.2	EGFR	13.7873	UGT1A8	-6604	KCNK18	8.84799e-05	PPP3CA	2168	CDH13	0.333333	RDX	0.0306693	RDX
30594.6	FOXP1	13.7551	UBAP1L	-6604	UGT1A8	8.82768e-05	MUC1	2163	RDX	0.333333	FOXP1	0.0306399	FOXP1
30115.5	MUC1	13.5981	PLK5	-6604	UBAP1L	8.82535e-05	FOXP1	2150	XPO1	0.333333	PLXDC2	0.0302106	PLXDC2
29682.8	TCF4	13.4841	DNAH1	-6604	PLK5	8.80592e-05	DAPK1	2122	DAPK1	0.333333	MUC1	0.0300418	MUC1
29574.7	NFIB	13.3202	UGT1A10	-6604	DNAH1	8.80049e-05	PLXDC2	2121	RBFOX1	0.333333	DAPK1	0.0296082	DAPK1
29499.2	PPP3CA	13.1996	SPSB4	-6604	UGT1A10	8.78503e-05	EGFR	2112	NFIA	0.333333	SETBP1	0.0295675	SETBP1
29381.9	DAPK1	13.1304	IL27	-6604	SPSB4	8.77963e-05	IQGAP2	2104	NFIB	0.333333	IQGAP2	0.0294677	IQGAP2
28980.4	XPO1	12.8889	ELFN2	-6604	IL27	8.77116e-05	JUN	2077	IQGAP2	0.333333	KCTD12	0.0291724	KCTD12
28839.4	PRL	12.88	CCL24	-6604	ELFN2	8.76271e-05	SETBP1	2055	SRPK1	0.333333	PTPRM	0.0290306	PTPRM
28033	GATA3	12.7543	ULBP1	-6604	CCL24	8.7604e-05	CTNNB1	2044	PLXDC2	0.333333	PIK3R1	0.0289903	PIK3R1
27714.9	JUN	12.6704	SAGE1	-6604	ULBP1	8.7581e-05	TCF4	2044	TCF4	0.333333	TCF4	0.028972	TCF4
27697.6	CTNNB1	12.6465	FAM83F	-6604	SAGE1	8.75657e-05	PIK3R1	2041	MUC1	0.333333	JUN	0.0288937	JUN
27296.5	IQGAP2	12.5598	CLEC18B	-6604	FAM83F	8.74967e-05	PTPRM	2019	HNRNPD	0.333333	CTNNB1	0.0288308	CTNNB1
27149.7	CLIC1	12.4146	CTAG1A	-6604	CLEC18B	8.74585e-05	KCTD12	2016	PTPRM	0.333333	EGFR	0.0288306	EGFR
27136.7	PIK3R1	12.2633	UGT1A1	-6604	CTAG1A	8.73057e-05	SMARCA2	2009	FOXP1	0.333333	ZEB2	0.0285106	ZEB2
27057.1	PRKCE	12.2359	SLC6A18	-6604	UGT1A1	8.72905e-05	PRKG1	2000	SMARCA2	0.333333	PRKG1	0.028398	PRKG1
27003.5	PLXDC2	12.2253	UGT2B7	-6604	SLC6A18	8.72676e-05	SRPK1	1983	SETBP1	0.333333	FRMD4A	0.0283681	FRMD4A
26821.6	HNRNPD	12.207	HIST1H3G	-6604	UGT2B7	8.726e-05	ANXA3	1971	RFC3	0.333333	ANXA3	0.0282785	ANXA3
26438.7	GFRA1	12.1363	NUDT14	-6604	HIST1H3G	8.71916e-05	FRMD4A	1958	ANXA3	0.333333	SMARCA2	0.0281369	SMARCA2
26404.8	PTPRT	12.1289	GGT7	-6604	NUDT14	8.71916e-05	HNRNPD	1954	PRKG1	0.333333	PTPRD	0.0276769	PTPRD
26243.2	MDM2	12.1086	SSPO	-6604	GGT7	8.71384e-05	ZEB2	1948	ZEB2	0.333333	HNRNPD	0.027653	HNRNPD
25922	SRPK1	12.0001	ASPG	-6604	SSPO	8.7108e-05	CLIC1	1946	CLIC1	0.333333	ADGRA3	0.0276432	ADGRA3
25876.6	FBXW7	11.9329	HIST4H4	-6604	ASPG	8.70474e-05	PTPRT	1946	APC	0.333333	LRP1B	0.0275024	LRP1B
25842.4	SMARCA2	11.868	PGBD3	-6604	HIST4H4	8.69565e-05	LRP1B	1943	KCTD12	0.333333	PTPRT	0.0274619	PTPRT
25797.8	LRP1B	11.7342	KREMEN2	-6604	PGBD3	8.69414e-05	PRL	1941	EPS15	0.333333	TOP1	0.0273762	TOP1
25766.4	TRIM28	11.6426	BIRC7	-6604	KREMEN2	8.69338e-05	TOP1	1936	AHR	0.333333	KLF12	0.0273054	KLF12
25698.6	SETBP1	11.6381	UGT1A6	-6604	BIRC7	8.69263e-05	GFRA1	1924	TOP1	0.333333	BMP2	0.0272785	BMP2
25690.9	KCTD12	11.613	HIST1H4I	-6604	UGT1A6	8.69112e-05	SPOCK1	1921	SPARC	0.333333	SPOCK1	0.0272642	SPOCK1
25492.9	PARK2	11.6068	PRRT2	-6604	HIST1H4I	8.68885e-05	XPO1	1920	MAPK14	0.333333	PARK2	0.0272068	PARK2
25487.4	PTPRM	11.5705	MEFV	-6604	PRRT2	8.68734e-05	FBXW7	1915	SPOCK1	0.333333	SRPK1	0.0271774	SRPK1
25306.1	PRKG1	11.5263	FBXO41	-6604	MEFV	8.68583e-05	PARK2	1915	CSNK2A1	0.333333	GFRA1	0.0271423	GFRA1
25235.7	SPOCK1	11.488	CAMSAP3	-6604	FBXO41	8.68583e-05	PTPRD	1907	FYN	0.333333	FBXW7	0.027103	FBXW7
25138.7	FRMD4A	11.4472	C17orf49	-6604	CAMSAP3	8.68508e-05	ADGRA3	1896	BMP2	0.333333	APC	0.0270345	APC
24822.5	ANXA3	11.4074	HIST1H3I	-6604	C17orf49	8.68508e-05	BMP2	1889	ACVR1	0.333333	EPS15	0.0270083	EPS15
24772.5	APC	11.3928	AGRP	-6604	HIST1H3I	8.6798e-05	APC	1886	PTPRT	0.333333	AFF1	0.026819	AFF1
24406	ACVR1	11.3799	WDR90	-6604	AGRP	8.67077e-05	KLF12	1882	ID2	0.333333	AHR	0.0268104	AHR
24335.2	UQCRFS1	11.3724	TTC30B	-6604	WDR90	8.67002e-05	GATA3	1877	UQCRFS1	0.333333	SPARC	0.0267534	SPARC
24319.5	VEGFC	11.3374	RASL10B	-6604	TTC30B	8.67002e-05	UQCRFS1	1869	PRL	0.333333	MAF	0.0267117	MAF
24166.9	BMP2	11.3249	CHAT	-6604	RASL10B	8.66251e-05	DAB1	1867	PTPRD	0.333333	NT5E	0.0267005	NT5E
24024.4	TOP1	11.2623	HIST1H4J	-6604	CHAT	8.66251e-05	SPARC	1867	TPM1	0.333333	CAMK2D	0.0265804	CAMK2D
23866.7	ADAMTS9	11.2622	LRRC58	-6604	HIST1H4J	8.66176e-05	EPS15	1865	PARK2	0.333333	PIK3C3	0.026514	PIK3C3
23805.5	CAMK2D	11.2544	UCN	-6604	LRRC58	8.66026e-05	AHR	1861	FBXW7	0.333333	PRL	0.0265125	PRL
23795.8	PTPRD	11.2112	HIST1H4D	-6604	UCN	8.65576e-05	AFF1	1855	KLF12	0.333333	ACVR1	0.0264849	ACVR1
23641	KLF12	11.1765	RTEL1	-6604	HIST1H4D	8.65576e-05	ACVR1	1854	TGFBR2	0.333333	TCF7L2	0.0264643	TCF7L2
23640.8	ZEB2	11.1755	BAHCC1	-6604	RTEL1	8.64977e-05	CAMK2D	1851	DAB1	0.333333	CAMTA1	0.0264393	CAMTA1
23610.9	NTRK1	11.1239	HIST1H4L	-6604	BAHCC1	8.64528e-05	MAF	1845	GFRA1	0.333333	CLIC1	0.0263254	CLIC1
23548.2	EPS15	11.1099	GSC2	-6604	HIST1H4L	8.64006e-05	PIK3C3	1837	GATA3	0.333333	UQCRFS1	0.0262768	UQCRFS1
23303.3	SOD3	11.1034	SOX15	-6604	GSC2	8.63558e-05	TCF7L2	1837	MAF	0.333333	CTNNA3	0.0262127	CTNNA3
23266.4	CDH3	11.0801	TMEM88	-6604	SOX15	8.63558e-05	RFC3	1836	FRMD4A	0.333333	TPM1	0.0261775	TPM1
23244.6	GLI3	11.0592	NUDT7	-6604	TMEM88	8.63036e-05	CAMTA1	1831	ADGRA3	0.333333	GATA3	0.0261411	GATA3
23216.6	TUBA1A	11.0484	SLC38A5	-6604	NUDT7	8.63036e-05	ID2	1831	CXCL12	0.333333	ID2	0.0261235	ID2
23200.4	KDM1A	11.0258	GGT1	-6604	SLC38A5	8.62887e-05	SLC7A11	1829	PPP1CC	0.333333	MAP4K4	0.0259841	MAP4K4
23163.2	SPARC	11.0168	NANOG	-6604	GGT1	8.62738e-05	VEGFC	1828	MAP3K7	0.333333	MEIS1	0.0259764	MEIS1
23139.6	RPA3	11.0086	SLC46A1	-6604	NANOG	8.62441e-05	NT5E	1822	MEIS1	0.333333	TGFBR2	0.025964	TGFBR2
22829.6	RFC3	10.9949	SLC45A4	-6604	SLC46A1	8.61698e-05	MEIS1	1811	PIK3C3	0.333333	TGFBR3	0.0259161	TGFBR3
22815.5	ADGRA3	10.985	HIST1H3C	-6604	SLC45A4	8.61549e-05	CTNNA3	1811	PRKCQ	0.333333	NT5C2	0.0258804	NT5C2
22776.7	PIK3C3	10.9546	KCNK16	-6604	HIST1H3C	8.61549e-05	NT5C2	1810	LRP1B	0.333333	DAB1	0.0257767	DAB1
22719.3	SLC7A11	10.9533	BCL2L10	-6604	KCNK16	8.61549e-05	PRKCQ	1809	TCF7L2	0.333333	XYLT1	0.0257529	XYLT1
22651.5	AFF1	10.9454	ASIC4	-6604	BCL2L10	8.61252e-05	TPM1	1809	TGFBR3	0.333333	RFC3	0.0257499	RFC3
22589.3	CXCL12	10.9425	METTL16	-6604	ASIC4	8.60956e-05	TGFBR3	1809	MAP4K4	0.333333	SORBS2	0.0257449	SORBS2
22508.3	PSMD7	10.9233	HIST1H4E	-6604	METTL16	8.60882e-05	PSMD7	1805	HMGB1	0.333333	SLC7A11	0.0257288	SLC7A11
22485.7	RREB1	10.9223	DNAJC4	-6604	HIST1H4E	8.60659e-05	SORBS2	1801	CAMK2D	0.333333	VEGFC	0.0256693	VEGFC
22454.2	AHR	10.9147	PRSS55	-6604	DNAJC4	8.60363e-05	MAP4K4	1798	FBN1	0.333333	PRKCQ	0.0256217	PRKCQ
22390.1	MAF	10.8974	NUDT22	-6604	PRSS55	8.60215e-05	CXCL12	1797	AFF1	0.333333	CXCL12	0.0255687	CXCL12
22310.9	ACTN4	10.8661	ALDH1L2	-6604	NUDT22	8.60215e-05	TGFBR2	1795	VEGFC	0.333333	XPO1	0.0254986	XPO1
22299.3	MEIS1	10.8597	DYNC2H1	-6604	ALDH1L2	8.60141e-05	DCLK1	1793	PPP2CA	0.333333	PLCB1	0.0254729	PLCB1
22256.9	TCF7L2	10.8519	IL36B	-6604	DYNC2H1	8.59697e-05	SUCLG2	1793	STAT3	0.333333	DCLK1	0.0254443	DCLK1
22161.9	NCOR2	10.8502	DSPP	-6604	IL36B	8.59328e-05	ADAMTS9	1792	JAG1	0.333333	PLXNC1	0.0254292	PLXNC1
22013.2	CYP19A1	10.828	MRGPRX3	-6604	DSPP	8.59328e-05	BHLHE40	1791	PSMD7	0.333333	SUCLG2	0.025316	SUCLG2
21994.5	BMPR1B	10.7866	IL1RL2	-6604	MRGPRX3	8.59328e-05	XYLT1	1789	LAMC1	0.333333	CACNA1C	0.0253077	CACNA1C
21988.3	CAMTA1	10.7562	KCNK15	-6604	IL1RL2	8.59254e-05	CYP19A1	1788	NT5E	0.333333	ANK3	0.0252426	ANK3
21956.5	PRKCQ	10.7393	KIF26A	-6604	KCNK15	8.5918e-05	PRKCE	1780	ACTR3	0.333333	JAG1	0.0252294	JAG1
21857.5	MCM2	10.7333	PKDCC	-6604	KIF26A	8.58811e-05	MAP3K7	1772	VIM	0.333333	MBNL1	0.0251988	MBNL1
21816.4	DCLK1	10.7234	TLR9	-6604	PKDCC	8.58369e-05	JAG1	1769	ACTN4	0.333333	PRKCE	0.0251897	PRKCE
21728.6	ID2	10.6913	CCDC28B	-6604	TLR9	8.58148e-05	PLCB1	1768	BHLHE40	0.333333	PTPRK	0.0251833	PTPRK
21458.4	CTSK	10.6874	MIP	-6604	CCDC28B	8.58001e-05	PPP1CC	1767	CDH1	0.333333	CYP19A1	0.0251204	CYP19A1
21439	MAP3K7	10.6814	TNFRSF13C	-6604	MIP	8.57927e-05	CACNA1C	1763	GLI3	0.333333	ACTR3	0.0251113	ACTR3
21416.2	BHLHE40	10.6791	WDR54	-6604	TNFRSF13C	8.57927e-05	HMGB1	1761	NT5C2	0.333333	BHLHE40	0.0251037	BHLHE40
21251.5	SORBS2	10.6617	IL19	-6604	WDR54	8.57854e-05	KDM1A	1759	PRKCE	0.333333	NRXN3	0.025079	NRXN3
21178.2	TGFBR2	10.6129	FOXJ1	-6604	IL19	8.5778e-05	ANK3	1758	SLC7A11	0.333333	PSMD7	0.0250704	PSMD7
21136.9	CHST15	10.5924	ADAL	-6604	FOXJ1	8.57706e-05	RREB1	1751	RPA3	0.333333	CSNK2A1	0.0249963	CSNK2A1
21125.9	FBN1	10.5873	SLX4	-6604	ADAL	8.57559e-05	SGMS1	1747	CTNND2	0.333333	FOXN3	0.0249618	FOXN3
21003.8	SUCLG2	10.5735	WIPF3	-6604	SLX4	8.57486e-05	CSNK2A1	1741	DCLK1	0.333333	ZBTB20	0.0249584	ZBTB20
20997.8	SOD1	10.5614	FNDC5	-6604	WIPF3	8.57412e-05	ACTR3	1741	XYLT1	0.333333	SGMS1	0.0249342	SGMS1
20976.1	ZHX2	10.5268	REXO1	-6604	FNDC5	8.57265e-05	PTPRK	1739	SORBS2	0.333333	UBE3A	0.0249258	UBE3A
20934.2	HMGB1	10.5126	PHYKPL	-6604	REXO1	8.57118e-05	FBN1	1739	ANK3	0.333333	MAP3K7	0.0249187	MAP3K7
20843	NT5C2	10.511	DPM3	-6604	PHYKPL	8.56971e-05	PLXNC1	1735	FLI1	0.333333	NRG1	0.0248901	NRG1
20707.6	CTNNA3	10.5104	DNAH2	-6604	DPM3	8.56898e-05	ACTN4	1732	PLCB1	0.333333	RBMS1	0.0247879	RBMS1
20663.8	EXT1	10.4907	OXER1	-6604	DNAH2	8.56898e-05	UBE3A	1731	ADAMTS9	0.333333	LAMC1	0.024764	LAMC1
20612.3	PPP1CC	10.4823	ACRBP	-6604	OXER1	8.56898e-05	CTNND2	1730	CAMTA1	0.333333	CTNND2	0.0246327	CTNND2
20600.3	SLC2A1	10.4435	KIAA1549	-6604	ACRBP	8.56678e-05	MAPK14	1729	PTPRK	0.333333	MECOM	0.024612	MECOM
20559.9	CDH1	10.4086	MRGPRX4	-6604	KIAA1549	8.56604e-05	BZW1	1726	KDM1A	0.333333	VIM	0.0246057	VIM
20531.3	ADAR	10.3994	IL17RD	-6604	MRGPRX4	8.56531e-05	NRG1	1725	CPE	0.333333	BZW1	0.0246019	BZW1
20510.9	PTPRU	10.3853	IL17RC	-6604	IL17RD	8.56458e-05	VIM	1723	CYP19A1	0.333333	MYOF	0.0245867	MYOF
20508.4	ERBB4	10.376	ANGPTL6	-6604	IL17RC	8.56384e-05	FOXN3	1721	HDAC1	0.333333	FBN1	0.0245497	FBN1
20504.8	FOXN3	10.363	CCL15	-6604	ANGPTL6	8.56384e-05	GLI3	1720	SUCLG2	0.333333	HMGB1	0.024489	HMGB1
20448.9	VCAM1	10.3546	IFNL1	-6604	CCL15	8.56384e-05	LAMC1	1717	RREB1	0.333333	MAPK14	0.0244833	MAPK14
20447.3	SNRPB2	10.3184	PRR7	-6604	IFNL1	8.56311e-05	NRXN3	1715	CNTN1	0.333333	NRP2	0.0244732	NRP2
20437	TPM1	10.3123	ASRGL1	-6604	PRR7	8.56164e-05	MBNL1	1704	VCAM1	0.333333	RREB1	0.0244658	RREB1
20430.3	GNAI2	10.3014	ERN2	-6604	ASRGL1	8.56091e-05	PPP2CA	1700	NCOR2	0.333333	RALGPS2	0.024447	RALGPS2
20416.5	GSTP1	10.2941	SLC5A3	-6604	ERN2	8.56018e-05	VCAM1	1700	MCM2	0.333333	ADAMTS9	0.0244125	ADAMTS9
20274.7	DCC	10.2666	PCGF1	-6604	SLC5A3	8.55725e-05	CDH3	1700	MAPK1	0.333333	PPP1CC	0.0244037	PPP1CC
20265.3	GYPC	10.2551	ETFBKMT	-6604	PCGF1	8.55578e-05	BMPR1B	1699	SGMS1	0.333333	ERBB4	0.0243563	ERBB4
20254.9	MAPK14	10.2507	RTN4R	-6604	ETFBKMT	8.55505e-05	ERBB4	1698	MYOF	0.333333	MAN1A1	0.0243382	MAN1A1
20225.2	SGMS1	10.2457	PLCXD1	-6604	RTN4R	8.55286e-05	NCOR2	1697	UBE3A	0.333333	ITPKB	0.0243264	ITPKB
20178.4	VRK2	10.2402	RNF169	-6604	PLCXD1	8.55286e-05	VRK2	1697	TUBA1A	0.333333	TBL1XR1	0.0243117	TBL1XR1
20156.3	NRG1	10.2399	ZNF692	-6604	RNF169	8.55066e-05	TUBA1A	1697	SUMO1	0.333333	DPF3	0.0242874	DPF3
20124.7	PTPN13	10.2394	SLC16A8	-6604	ZNF692	8.54774e-05	TRIM28	1691	TRIM28	0.333333	ZFP36L1	0.0242748	ZFP36L1
20121.8	CTNND2	10.223	IFT172	-6604	SLC16A8	8.54774e-05	CPE	1691	ABL1	0.333333	FMNL2	0.0242591	FMNL2
20099.8	VIM	10.1973	CENPT	-6604	IFT172	8.54701e-05	ITPKB	1686	MBNL1	0.333333	FYN	0.0242328	FYN
20093.2	ANK3	10.1969	VGF	-6604	CENPT	8.54701e-05	ZBTB20	1685	FOXN3	0.333333	CNTN1	0.024213	CNTN1
19942.1	TGFBR3	10.1864	ZNF282	-6604	VGF	8.54701e-05	RBMS1	1685	SNRPB2	0.333333	PPP2CA	0.0242013	PPP2CA
19929.6	HDAC1	10.184	LRFN4	-6604	ZNF282	8.54628e-05	MYOF	1684	CHEK1	0.333333	BMPR1B	0.0241576	BMPR1B
19891.7	CACNA1C	10.1798	CCL1	-6604	LRFN4	8.54482e-05	FYN	1683	BCL6	0.333333	CPE	0.0241534	CPE
19884.4	NT5E	10.1716	CCL26	-6604	CCL1	8.54044e-05	ZHX2	1682	CTNNA3	0.333333	KDM1A	0.024132	KDM1A
19874.8	LAMC1	10.1707	DEFB103B	-6604	CCL26	8.53898e-05	CDH1	1681	CDH3	0.333333	VRK2	0.0241278	VRK2
19839.3	PPP2CA	10.1544	TP53I13	-6604	DEFB103B	8.53825e-05	DCC	1679	NRG1	0.333333	VCAM1	0.024116	VCAM1
19796.7	GOT2	10.1543	NEU4	-6604	TP53I13	8.53825e-05	RPA3	1678	PLXNC1	0.333333	GLI3	0.0240736	GLI3
19726.2	ADK	10.1474	FLCN	-6604	NEU4	8.53606e-05	EXT1	1677	CD53	0.333333	PBX3	0.0240522	PBX3
19714.1	CPE	10.1304	B3GNT9	-6604	FLCN	8.53461e-05	SOD3	1676	PDGFRA	0.333333	DCC	0.0240443	DCC
19632	CPS1	10.121	D2HGDH	-6604	B3GNT9	8.53461e-05	TBL1XR1	1675	BMPR1B	0.333333	SYNE1	0.024026	SYNE1
19587.8	LSM6	10.1165	FAM111B	-6604	D2HGDH	8.53388e-05	CNTN1	1675	CTSK	0.333333	BCL6	0.0240248	BCL6
19583.2	ABL1	10.1124	SIGLEC9	-6604	FAM111B	8.53315e-05	MECOM	1674	BZW1	0.333333	SLC1A1	0.023927	SLC1A1
19552.8	LBR	10.0959	C4orf48	-6604	SIGLEC9	8.53242e-05	NRP2	1670	PBX3	0.333333	CDH11	0.0239103	CDH11
19490.1	SUMO1	10.0926	MAGED4B	-6604	C4orf48	8.53024e-05	ADAR	1667	COL4A1	0.333333	FLI1	0.0239035	FLI1
19428.4	XYLT1	10.0829	NPPC	-6604	MAGED4B	8.52878e-05	FLI1	1663	VRK2	0.333333	ANKS1A	0.0238565	ANKS1A
19398.9	JAG1	10.0783	FOXC2	-6604	NPPC	8.52733e-05	PBX3	1662	EXT1	0.333333	PDGFRA	0.0238456	PDGFRA
19330.4	EHHADH	10.0778	IFNL3	-6604	FOXC2	8.52515e-05	CPS1	1660	RBMS1	0.333333	SATB1	0.0237923	SATB1
19320.4	UBE3A	10.0746	SLC27A1	-6604	IFNL3	8.52515e-05	BCL6	1659	NRXN3	0.333333	SET	0.0237905	SET
19307.1	MAP4K4	10.0701	GPR55	-6604	SLC27A1	8.52297e-05	LBR	1659	ERBB4	0.333333	EXT1	0.0237776	EXT1
19192.2	FMOD	10.062	XCR1	-6604	GPR55	8.52079e-05	DPF3	1659	ACVR2A	0.333333	OPCML	0.0237641	OPCML
19180.1	INA	10.0534	CCL27	-6604	XCR1	8.52079e-05	FGFR2	1659	CDKN1A	0.333333	RBMS3	0.0236744	RBMS3
19108.8	ACTR3	10.0513	PWWP2B	-6604	CCL27	8.52079e-05	MAN1A1	1658	FGFR2	0.333333	ARHGAP21	0.0236738	ARHGAP21
19068.7	FYN	10.0488	XAGE3	-6604	PWWP2B	8.52006e-05	PTPN13	1657	SOD1	0.333333	NCOR2	0.0236725	NCOR2
18985.9	PLCB1	10.0349	IL22	-6604	XAGE3	8.52006e-05	PGD	1654	PTPN13	0.333333	EPS8	0.0236655	EPS8
18975.6	PBX3	10.0334	SLC35F1	-6604	IL22	8.52006e-05	SNRPB2	1653	ZHX2	0.333333	TBC1D1	0.0236577	TBC1D1
18950.5	CSNK2A1	10.0183	NTNG2	-6604	SLC35F1	8.51934e-05	EPS8	1653	CDH11	0.333333	CUX1	0.0236402	CUX1
18921.6	ATP5J	10.0128	IFNL2	-6604	NTNG2	8.51861e-05	SET	1650	CACNA1C	0.333333	CDH3	0.0236046	CDH3
18889.2	FGFR2	10.0122	GDF2	-6604	IFNL2	8.51789e-05	CTSK	1649	CPS1	0.333333	ZHX2	0.0235893	ZHX2
18871.4	PLXNC1	9.99365	HIST1H4A	-6604	GDF2	8.51644e-05	RBMS3	1649	COL1A2	0.333333	PTPN13	0.0235498	PTPN13
18828.1	MAPK7	9.99182	CRLF2	-6604	HIST1H4A	8.51281e-05	PDGFRA	1648	EHHADH	0.333333	FGFR2	0.0235252	FGFR2
18818	ITPKB	9.98477	GDF9	-6604	CRLF2	8.51209e-05	LSM6	1646	ITPKB	0.333333	SLIT3	0.0234923	SLIT3
18811.4	ITGA3	9.9799	IL25	-6604	GDF9	8.51209e-05	OPCML	1643	ZBTB20	0.333333	RERE	0.0234839	RERE
18759.7	PTPRK	9.97697	PCDHGC3	-6604	IL25	8.51209e-05	SATB1	1641	ZFP36L1	0.333333	COL4A1	0.0234703	COL4A1
18754	CDKN1A	9.96786	NRG4	-6604	PCDHGC3	8.50991e-05	ANKS1A	1640	FMOD	0.333333	CDH1	0.0234574	CDH1
18752	CNTN1	9.96615	POLE4	-6604	NRG4	8.50919e-05	RALGPS2	1636	EPS8	0.333333	CPS1	0.0234525	CPS1
18749.2	NRP2	9.96537	ANGPT4	-6604	POLE4	8.50702e-05	FMOD	1633	NRP2	0.333333	LBR	0.023406	LBR
18662.5	SH3GL2	9.93716	S1PR3	-6604	ANGPT4	8.50629e-05	FMNL2	1633	SET	0.333333	WNK1	0.0233588	WNK1
18655.6	IL10RB	9.92291	S100G	-6604	S1PR3	8.50629e-05	SLC1A1	1633	SYT1	0.333333	SH3PXD2A	0.0233349	SH3PXD2A
18642.7	SPR	9.91965	BCL2L12	-6604	S100G	8.50557e-05	CUX1	1632	LSM6	0.333333	PGD	0.0232796	PGD
18566.6	PPARG	9.91692	IFNK	-6604	BCL2L12	8.50412e-05	GYPC	1630	ADAR	0.333333	ACTN4	0.0232695	ACTN4
18500.8	SNRPB	9.90355	DLGAP3	-6604	IFNK	8.5034e-05	TBC1D1	1629	TBL1XR1	0.333333	RORA	0.023235	RORA
18495.7	MYOF	9.90133	IGSF8	-6604	DLGAP3	8.5034e-05	ZFP36L1	1628	LBR	0.333333	ACVR2A	0.0231684	ACVR2A
18461.5	BCL6	9.8976	TNFSF9	-6604	IGSF8	8.50196e-05	RERE	1628	SYK	0.333333	PHYHIPL	0.0231571	PHYHIPL
18458.3	BZW1	9.89726	SPRYD4	-6604	TNFSF9	8.50123e-05	SYNE1	1622	CCT2	0.333333	DPYD	0.0231401	DPYD
18436.7	TBL1XR1	9.89205	SPSB3	-6604	SPRYD4	8.50123e-05	COL4A1	1622	MYC	0.333333	TEAD1	0.0231179	TEAD1
18431.1	NRXN3	9.88852	HIST1H3B	-6604	SPSB3	8.50051e-05	GSTP1	1619	SOD3	0.333333	MSR1	0.0231003	MSR1
18381	RAI14	9.88651	ZNHIT2	-6604	HIST1H3B	8.50051e-05	SOD1	1616	DUT	0.333333	FMOD	0.0230789	FMOD
18361.1	CDC20	9.87783	CXCL17	-6604	ZNHIT2	8.49907e-05	GOT2	1615	SATB1	0.333333	PROX1	0.0230659	PROX1
18286.7	MBNL1	9.87263	FBP2	-6604	CXCL17	8.49834e-05	PTPRU	1614	ANKS1A	0.333333	ELOVL6	0.0230545	ELOVL6
18217.8	FLI1	9.87133	CCL28	-6604	FBP2	8.49762e-05	ACVR2A	1614	MDM2	0.333333	ADAR	0.0230458	ADAR
18174.6	PHYHIPL	9.86401	NUDT19	-6604	CCL28	8.4969e-05	RORA	1614	PCNA	0.333333	ESRRG	0.0230414	ESRRG
18173.1	PINK1	9.84345	HIST1H3A	-6604	NUDT19	8.4969e-05	CD53	1612	DCC	0.333333	TUBA1A	0.0230361	TUBA1A
18150.1	DPF3	9.83241	DLL3	-6604	HIST1H3A	8.49618e-05	EHHADH	1612	ESR1	0.333333	RSU1	0.0230052	RSU1
18120.7	OCA2	9.82687	SCT	-6604	DLL3	8.49329e-05	GPC3	1611	PGD	0.333333	SNRPB2	0.0229933	SNRPB2
18036	MYC	9.80636	BCO1	-6604	SCT	8.49185e-05	PHYHIPL	1610	SH3GL2	0.333333	GPC3	0.0229816	GPC3
17986.6	GCH1	9.79763	RP11-566K11.2	-6604	BCO1	8.49185e-05	DPYD	1609	MAN1A1	0.333333	PMP22	0.0229624	PMP22
17983.6	CD53	9.79335	NUP62CL	-6604	RP11-566K11.2	8.49185e-05	SLIT3	1608	GSTP1	0.333333	PTHLH	0.0229469	PTHLH
17950.6	SNCA	9.78169	CXCL16	-6604	NUP62CL	8.49113e-05	ELOVL6	1604	ITGA3	0.333333	CREB5	0.0229331	CREB5
17931.3	RBMS3	9.77955	CSAD	-6604	CXCL16	8.48896e-05	ABL1	1593	RERE	0.333333	KANK1	0.0229253	KANK1
17907.8	DPYD	9.77447	EPN3	-6604	CSAD	8.48824e-05	PROX1	1592	DUSP3	0.333333	DAAM1	0.0229062	DAAM1
17872.3	SERTAD2	9.77422	FNDC10	-6604	EPN3	8.48752e-05	TEAD1	1592	NFKB1	0.333333	ARHGAP26	0.0228966	ARHGAP26
17838.3	CCT2	9.76851	POLR3G	-6604	FNDC10	8.48752e-05	WNK1	1590	RBMS3	0.333333	LSM6	0.0228895	LSM6
17820	PGD	9.76843	CCNO	-6604	POLR3G	8.4868e-05	ADK	1590	MAPK7	0.333333	COL1A2	0.0228708	COL1A2
17817.4	GFPT1	9.76592	KANSL3	-6604	CCNO	8.48608e-05	CDKN1A	1590	VRK1	0.333333	PPP2R5C	0.0228679	PPP2R5C
17785.3	RPL41	9.76228	CCR10	-6604	KANSL3	8.48536e-05	MAPK7	1589	DPYD	0.333333	MGAT5	0.0228627	MGAT5
17779.4	RERE	9.7545	LRRN2	-6604	CCR10	8.4832e-05	GCH1	1587	GOT2	0.333333	AMOTL2	0.0228365	AMOTL2
17777.8	NGFR	9.75395	CPTP	-6604	LRRN2	8.4832e-05	SH3PXD2A	1586	PMP22	0.333333	VEGFA	0.0228332	VEGFA
17740.8	IRF2	9.74666	DRAP1	-6604	CPTP	8.48176e-05	KANK1	1585	MECOM	0.333333	ADGRL2	0.0228169	ADGRL2
17732.6	EPS8	9.74604	TAS2R38	-6604	DRAP1	8.48176e-05	VEGFA	1585	SNCA	0.333333	PLPP3	0.0227988	PLPP3
17702.4	ZBTB20	9.74367	FSD1	-6604	TAS2R38	8.48033e-05	SLC2A1	1583	NAP1L1	0.333333	SLIT2	0.0227944	SLIT2
17652.2	RBMS1	9.73937	COX7B2	-6604	FSD1	8.48033e-05	CDH11	1582	SLC1A1	0.333333	GPC6	0.022793	GPC6
17652	ZFHX3	9.72254	MXD3	-6604	COX7B2	8.47889e-05	ARHGAP26	1582	WNK1	0.333333	PRKD1	0.0227761	PRKD1
17638.3	ACVR2A	9.71462	IL20	-6604	MXD3	8.47817e-05	TXN	1579	ADK	0.333333	TMPO	0.0227747	TMPO
17624.7	SET	9.71038	ETV2	-6604	IL20	8.47745e-05	CHST15	1578	SLC2A1	0.333333	GALNT10	0.022765	GALNT10
17617.7	FOXG1	9.70909	HENMT1	-6604	ETV2	8.47673e-05	CCT2	1578	TXN	0.333333	DUSP3	0.0227449	DUSP3
17593.2	ELOVL6	9.70065	SCYL1	-6604	HENMT1	8.47601e-05	GNAI2	1576	GPC3	0.333333	ADD3	0.0227403	ADD3
17550.9	FGF12	9.69495	TGM5	-6604	SCYL1	8.47601e-05	DUSP3	1575	IRF2	0.333333	PTPN12	0.0227318	PTPN12
17512.2	RORA	9.68758	KLHL29	-6604	TGM5	8.47458e-05	PAPPA	1575	PPARG	0.333333	ROBO1	0.0227173	ROBO1
17511.9	ANKS1A	9.68739	SLC2A6	-6604	KLHL29	8.47458e-05	PMP22	1574	OPCML	0.333333	CYFIP2	0.0227109	CYFIP2
17477.4	TXN	9.67428	PDCD1	-6604	SLC2A6	8.47314e-05	GALNT10	1573	TBC1D1	0.333333	PIP4K2A	0.0226595	PIP4K2A
17457.9	SYT1	9.67352	TAF1L	-6604	PDCD1	8.47314e-05	IRF2	1573	RORA	0.333333	PAPPA	0.0226422	PAPPA
17457.9	ADSL	9.66669	POLH	-6604	TAF1L	8.47314e-05	ARHGAP21	1572	CDC20	0.333333	MAPK7	0.0226383	MAPK7
17456	COL4A1	9.66043	GPR26	-6604	POLH	8.4717e-05	CYFIP2	1571	ADD3	0.333333	RIN2	0.0226356	RIN2
17447.8	MEIS2	9.65601	KCNH4	-6604	GPR26	8.4717e-05	AMOTL2	1571	HSP90AA1	0.333333	CDH2	0.0226115	CDH2
17415.5	GRIA1	9.65497	RBFOX3	-6604	KCNH4	8.47027e-05	GPC6	1570	GNAI2	0.333333	GRIA1	0.0225983	GRIA1
17401.2	ARHGAP26	9.64944	C9orf24	-6604	RBFOX3	8.47027e-05	ABLIM1	1568	CUX1	0.333333	CD53	0.0225727	CD53
17400.2	RSU1	9.64761	SCAF1	-6604	C9orf24	8.47027e-05	SLIT2	1567	PTPN12	0.333333	DLC1	0.0225487	DLC1
17375.2	OPCML	9.64359	GPR151	-6604	SCAF1	8.46955e-05	MSR1	1565	SLIT2	0.333333	ABLIM1	0.0225452	ABLIM1
17356	SATB1	9.6423	LRRN4	-6604	GPR151	8.46883e-05	ITGA3	1563	GYPC	0.333333	JARID2	0.0225356	JARID2
17276.4	CUX1	9.63509	FOXD1	-6604	LRRN4	8.46883e-05	SNCA	1562	VEGFA	0.333333	RPA3	0.0225344	RPA3
17273.6	VEGFA	9.63188	SLURP1	-6604	FOXD1	8.46883e-05	ADD3	1562	SMAD1	0.333333	NAP1L1	0.0225343	NAP1L1
17269.9	KANK1	9.6158	PAEP	-6604	SLURP1	8.46883e-05	DUT	1561	ITGA2	0.333333	CHST15	0.0225211	CHST15
17258.9	BMP4	9.6156	COMMD6	-6604	PAEP	8.46883e-05	SYT1	1560	SYNE1	0.333333	ITGA2	0.0225144	ITGA2
17255	IRS2	9.60831	PTP4A3	-6604	COMMD6	8.46812e-05	STAT3	1559	SERPINA1	0.333333	MAP1B	0.0225081	MAP1B
17204.3	MECOM	9.59845	KMT2D	-6604	PTP4A3	8.46668e-05	RSU1	1559	PTK2	0.333333	ADK	0.0225044	ADK
17179.9	PROX1	9.58615	IAH1	-6604	KMT2D	8.46668e-05	PLPP3	1557	GAP43	0.333333	SOD3	0.0224948	SOD3
17171.3	MYRIP	9.57361	ISLR2	-6604	IAH1	8.46597e-05	IRS2	1557	PALLD	0.333333	EHHADH	0.0224921	EHHADH
17153.4	GPC3	9.56997	TMEM19	-6604	ISLR2	8.46525e-05	NAP1L1	1556	TP53	0.333333	GYPC	0.0224893	GYPC
17133.5	STAT3	9.56625	ROMO1	-6604	TMEM19	8.46453e-05	TMPO	1555	PTPRU	0.333333	GOT2	0.022479	GOT2
17101.7	HCLS1	9.54327	SEMA3B	-6604	ROMO1	8.46382e-05	NTRK1	1555	PROX1	0.333333	QKI	0.0224681	QKI
17037.3	PAPPA	9.54261	LUZP4	-6604	SEMA3B	8.46382e-05	SERTAD2	1554	SLIT3	0.333333	EBF1	0.0224416	EBF1
17033.5	ACTL8	9.5363	MZB1	-6604	LUZP4	8.46382e-05	ROBO1	1553	TEAD1	0.333333	FAM13A	0.0224415	FAM13A
16996.7	TEAD1	9.52554	HIST2H2BE	-6604	MZB1	8.4631e-05	SLC16A1	1550	GCH1	0.333333	SYT1	0.0224279	SYT1
16969.3	SLC16A1	9.52206	PROP1	-6604	HIST2H2BE	8.4631e-05	COL1A2	1550	PRKCA	0.333333	CTSK	0.0224257	CTSK
16870	MRPL22	9.51149	KIF7	-6604	PROP1	8.46024e-05	MDM2	1548	KANK1	0.333333	TXN	0.0223789	TXN
16832.2	PDGFRA	9.50472	FAM117B	-6604	KIF7	8.46024e-05	GRIA1	1547	DPF3	0.333333	IRS2	0.0223606	IRS2
16827.9	ABLIM1	9.499	FOXP3	-6604	FAM117B	8.46024e-05	SLC20A1	1546	PRKD1	0.333333	INSIG2	0.0223145	INSIG2
16827.4	GAP43	9.49712	SFT2D2	-6604	FOXP3	8.45881e-05	SYK	1546	KDR	0.333333	DENND1A	0.0223046	DENND1A
16772.9	RALGPS2	9.49022	LYRM9	-6604	SFT2D2	8.45809e-05	FHIT	1545	PRNP	0.333333	SERTAD2	0.0222909	SERTAD2
16766.7	TIMP4	9.49002	CCHCR1	-6604	LYRM9	8.45737e-05	SH3GL2	1544	COL15A1	0.333333	KCNMA1	0.0222792	KCNMA1
16756.3	SYK	9.48522	HOXB4	-6604	CCHCR1	8.45737e-05	ADGRL2	1543	PAPPA	0.333333	EDNRB	0.0222669	EDNRB
16755.1	PHGDH	9.47575	BOK	-6604	HOXB4	8.45666e-05	ITGA2	1542	IRS2	0.333333	FOXG1	0.0222625	FOXG1
16746.3	ZNF217	9.47425	GPR35	-6604	BOK	8.45594e-05	INSIG2	1542	F3	0.333333	GSTP1	0.0222378	GSTP1
16724.7	DEK	9.47039	IDUA	-6604	GPR35	8.45523e-05	BMP4	1541	TMPO	0.333333	DUT	0.0222071	DUT
16720.9	ADD3	9.46912	SLC41A1	-6604	IDUA	8.45451e-05	SUMO1	1540	SP1	0.333333	CADM1	0.0221911	CADM1
16676.2	DUT	9.46787	LCN1	-6604	SLC41A1	8.4538e-05	NGFR	1539	MAP1B	0.333333	STAT3	0.0221901	STAT3
16670.6	SLC20A1	9.46658	MOGAT1	-6604	LCN1	8.4538e-05	EMX2	1537	FLNB	0.333333	CTNNA1	0.0221786	CTNNA1
16618.9	ANKRD11	9.46221	TRAPPC9	-6604	MOGAT1	8.4538e-05	MEIS2	1536	PLPP3	0.333333	SYK	0.0221778	SYK
16609.5	CYFIP2	9.45588	CNTF	-6604	TRAPPC9	8.45309e-05	FOXG1	1536	CAV1	0.333333	SNCA	0.0221757	SNCA
16584.4	GALNT10	9.4492	CPT1C	-6604	CNTF	8.45309e-05	KCNMA1	1535	RSU1	0.333333	ABL1	0.0221549	ABL1
16559.3	CDK4	9.4491	RTKN	-6604	CPT1C	8.45309e-05	DAAM1	1533	PHYHIPL	0.333333	PALLD	0.0220967	PALLD
16558.1	EMX2	9.44512	RCCD1	-6604	RTKN	8.45237e-05	CREB5	1533	AMOTL2	0.333333	GAP43	0.0220883	GAP43
16513.3	WNK1	9.44359	KCNK7	-6604	RCCD1	8.45237e-05	PTHLH	1532	ARHGAP26	0.333333	PTPRU	0.0220869	PTPRU
16513.2	TBC1D1	9.43536	IFNW1	-6604	KCNK7	8.45237e-05	PRKD1	1532	ROBO1	0.333333	ARHGAP29	0.022069	ARHGAP29
16436.4	FANCC	9.42417	EMC10	-6604	IFNW1	8.44951e-05	ATP5J	1532	CDH2	0.333333	PRNP	0.0220582	PRNP
16433.7	MRPL23	9.41693	CDC42BPG	-6604	EMC10	8.44951e-05	PPARG	1531	NGFR	0.333333	FHIT	0.0220459	FHIT
16431.9	SLIT2	9.41324	CERS1	-6604	CDC42BPG	8.44951e-05	MAP1B	1530	ADGRL2	0.333333	SEL1L	0.022026	SEL1L
16427.9	FBL	9.41004	CERS4	-6604	CERS1	8.4488e-05	JARID2	1529	DAAM1	0.333333	BMP4	0.0220201	BMP4
16402.8	MAN1A1	9.40767	FBXO44	-6604	CERS4	8.4488e-05	PPP2R5C	1528	RALGPS2	0.333333	SLC20A1	0.0220158	SLC20A1
16399.8	AMOTL2	9.40267	SSH3	-6604	FBXO44	8.44809e-05	MGAT5	1528	MEIS2	0.333333	RUNX1T1	0.0220157	RUNX1T1
16374.8	DUSP3	9.39861	ARR3	-6604	SSH3	8.44809e-05	GAP43	1528	IL10RB	0.333333	IRF2	0.0219784	IRF2
16368.1	SLIT3	9.39744	EMC9	-6604	ARR3	8.44809e-05	ESRRG	1527	ELOVL6	0.333333	PDGFC	0.0219706	PDGFC
16350.4	MAP3K10	9.38492	POLR2J2	-6604	EMC9	8.44595e-05	FAM13A	1527	CHST15	0.333333	GCH1	0.0219363	GCH1
16323.5	TYRP1	9.38144	HAUS5	-6604	POLR2J2	8.44523e-05	ZFHX3	1527	SLC16A1	0.333333	NAV2	0.0219288	NAV2
16296	CMSS1	9.3692	TMED4	-6604	HAUS5	8.44523e-05	EBF1	1526	ABLIM1	0.333333	GALC	0.0219268	GALC
16287.8	FHIT	9.36763	FOXN1	-6604	TMED4	8.44523e-05	PTPN12	1524	SNW1	0.333333	RABGAP1L	0.0219246	RABGAP1L
16272.4	ROBO1	9.36571	WBP1	-6604	FOXN1	8.44452e-05	FGF12	1523	BMP4	0.333333	SLC16A1	0.0219158	SLC16A1
16255.1	LOXL1	9.36544	BMP10	-6604	WBP1	8.44452e-05	MYRIP	1523	SNRPB	0.333333	PDE4D	0.0219058	PDE4D
16238.1	KCNMA1	9.36455	MRPL41	-6604	BMP10	8.44452e-05	PIP4K2A	1523	YWHAZ	0.333333	PHF3	0.0218935	PHF3
16232	SYNE1	9.35904	LTB4R	-6604	MRPL41	8.44381e-05	F3	1522	CTNNA1	0.333333	MEIS2	0.0218929	MEIS2
16229.1	CCT7	9.3541	TRAPPC6A	-6604	LTB4R	8.44309e-05	RAI14	1522	BARD1	0.333333	SEMA3A	0.021877	SEMA3A
16194.6	PMP22	9.35142	NEIL1	-6604	TRAPPC6A	8.44096e-05	OCA2	1521	PHF3	0.333333	SMAD1	0.0218723	SMAD1
16189.3	F3	9.33452	KAT8	-6604	NEIL1	8.44024e-05	SEMA3A	1520	NTRK1	0.333333	FGF12	0.0218668	FGF12
16187.7	GHR	9.32639	KREMEN1	-6604	KAT8	8.43882e-05	PHF3	1519	CYFIP2	0.333333	CAMK1D	0.0218555	CAMK1D
16160.5	TSPAN5	9.32631	HIST1H3F	-6604	KREMEN1	8.43811e-05	IL10RB	1518	GALNT10	0.333333	CDKN1A	0.0218532	CDKN1A
16157.9	SEMA3A	9.32277	LIME1	-6604	HIST1H3F	8.43811e-05	RIN2	1518	ATP5J	0.333333	EMX2	0.0218492	EMX2
16146.7	FMNL2	9.31984	TRPV1	-6604	LIME1	8.43668e-05	NELL1	1518	CXCR4	0.333333	SLCO3A1	0.0218492	SLCO3A1
16137.6	CXCR4	9.31943	HILPDA	-6604	TRPV1	8.43597e-05	SLCO3A1	1517	SERTAD2	0.333333	KLF6	0.0217765	KLF6
16124.7	SH3PXD2A	9.31693	ANKDD1A	-6604	HILPDA	8.43597e-05	MCM2	1517	KIT	0.333333	SLC2A1	0.0217627	SLC2A1
16124.2	NAP1L1	9.31599	SOHLH1	-6604	ANKDD1A	8.43526e-05	SNRPB	1517	CDK4	0.333333	MYRIP	0.0217605	MYRIP
16114.4	NFKB1	9.31049	FEZF2	-6604	SOHLH1	8.43455e-05	ZNF217	1516	PPP2R5C	0.333333	F3	0.0217559	F3
16098	SP1	9.3102	NSUN5	-6604	FEZF2	8.43455e-05	PRNP	1516	GHR	0.333333	COL15A1	0.0217457	COL15A1
16090.3	SERPINA1	9.30225	MRPL22	-6604	NSUN5	8.43384e-05	TIMP4	1516	ZWINT	0.333333	MITF	0.0217433	MITF
16072	PHF3	9.29787	KCNK12	-6604	MRPL22	8.43241e-05	SERPINA1	1514	SH3PXD2A	0.333333	ZFHX3	0.0217367	ZFHX3
16036.5	SELENBP1	9.29045	SNAPC4	-6604	KCNK12	8.43241e-05	CDH2	1514	KCNMA1	0.333333	DYRK2	0.0217315	DYRK2
16036.3	INSIG2	9.28095	B3GALT4	-6604	SNAPC4	8.43099e-05	MYC	1514	LDB2	0.333333	MAN1A2	0.0217143	MAN1A2
16006	MME	9.27556	SIRT6	-6604	B3GALT4	8.43099e-05	DLC1	1511	SLC20A1	0.333333	TRIM28	0.021714	TRIM28
15970.6	DAP	9.27429	IL36A	-6604	SIRT6	8.43028e-05	DENND1A	1511	RAI14	0.333333	SOD1	0.0216912	SOD1
15968	LDB2	9.27315	SNAPC2	-6604	IL36A	8.43028e-05	HCLS1	1509	MSR1	0.333333	FER	0.0216788	FER
15959.4	SLC1A1	9.26568	FOXK1	-6604	SNAPC2	8.43028e-05	PODXL	1508	ARHGAP21	0.333333	OCA2	0.021668	OCA2
15955.1	PODXL	9.25266	CUZD1	-6604	FOXK1	8.43028e-05	FLNB	1508	EMX2	0.333333	RAI14	0.0216346	RAI14
15902.6	GRM4	9.24869	ETV3	-6604	CUZD1	8.43028e-05	PALLD	1508	CCT7	0.333333	SH3GL2	0.0215981	SH3GL2
15889.1	EBF1	9.24443	HOXB8	-6604	ETV3	8.42957e-05	GHR	1507	GRIA1	0.333333	FLNB	0.0215651	FLNB
15845	TFAP2C	9.23026	IAPP	-6604	HOXB8	8.42886e-05	ARHGAP29	1505	FMNL2	0.333333	NELL1	0.0215536	NELL1
15839.3	ESR1	9.2242	ATAD3A	-6604	IAPP	8.42815e-05	PDE4D	1505	PTHLH	0.333333	PODXL	0.0215528	PODXL
15794.9	CNTN2	9.21671	CCR8	-6604	ATAD3A	8.42744e-05	CTNNA1	1505	FAM13A	0.333333	PPARG	0.0215462	PPARG
15759.7	SLC6A13	9.20688	TRMT61A	-6604	CCR8	8.42602e-05	PINK1	1502	INSIG2	0.333333	ANKH	0.021543	ANKH
15755.4	CEBPA	9.20457	N4BP2L2	-6604	TRMT61A	8.42602e-05	LDB2	1502	HNRNPA2B1	0.333333	MDM2	0.0215196	MDM2
15752.3	VRK1	9.20351	PDX1	-6604	N4BP2L2	8.42531e-05	CXCR4	1501	FOXG1	0.333333	DLG1	0.0215178	DLG1
15727.6	GPC6	9.20028	GPRC6A	-6604	PDX1	8.4246e-05	PDGFC	1500	PSMD14	0.333333	CCT2	0.0214968	CCT2
15674.4	MGST2	9.19903	RP11-330H6.5	-6604	GPRC6A	8.4246e-05	CDC20	1499	ADSL	0.333333	APBB2	0.0214565	APBB2
15637.5	NTRK3	9.19557	SLC12A9	-6604	RP11-330H6.5	8.4246e-05	CADM1	1498	DCN	0.333333	ITPR1	0.0214311	ITPR1
15633.7	ITGA2	9.19205	DOK7	-6604	SLC12A9	8.42389e-05	CAMK1D	1493	CALD1	0.333333	VPS13C	0.0214184	VPS13C
15602.8	GREM1	9.18132	EDA2R	-6604	DOK7	8.42318e-05	RUNX1T1	1492	LYN	0.333333	LDB2	0.0214178	LDB2
15602.4	MXI1	9.17986	IL22RA1	-6604	EDA2R	8.42318e-05	EDNRB	1490	NELL1	0.333333	CLIC4	0.0214022	CLIC4
15595.6	PRKD1	9.17223	LPAR3	-6604	IL22RA1	8.42247e-05	INA	1489	DLC1	0.333333	DNM3	0.0213868	DNM3
15570.9	NELL1	9.16684	KRTCAP2	-6604	LPAR3	8.42247e-05	KLF6	1487	ZFHX3	0.333333	SERPINA1	0.0213819	SERPINA1
15568.9	ADGRL2	9.16093	ZNF787	-6604	KRTCAP2	8.42247e-05	SMAD1	1487	ARHGAP29	0.333333	CLTA	0.0213456	CLTA
15550.9	HSP90AA1	9.15766	IL17C	-6604	ZNF787	8.42034e-05	NAV2	1485	PDE4D	0.333333	PARD3	0.0213437	PARD3
15544.3	JARID2	9.15705	POTEM	-6604	IL17C	8.41893e-05	GALC	1484	JARID2	0.333333	NGFR	0.0213383	NGFR
15510.3	BLVRB	9.15569	SLC1A7	-6604	POTEM	8.41893e-05	QKI	1484	ZNF217	0.333333	FUT8	0.0213231	FUT8
15487.6	PRKCA	9.15045	SLC6A8	-6604	SLC1A7	8.41822e-05	CLTA	1483	EBF1	0.333333	ZNF217	0.0213064	ZNF217
15487.3	HNRNPAB	9.13357	SIRT3	-6604	SLC6A8	8.41822e-05	RABGAP1L	1483	PIP4K2A	0.333333	ITGA3	0.0212863	ITGA3
15467.8	FLNB	9.12596	CD70	-6604	SIRT3	8.41822e-05	DYRK2	1483	HCLS1	0.333333	PTK2	0.0212846	PTK2
15420.7	MGP	9.12336	TMSB15B	-6604	CD70	8.41609e-05	VRK1	1483	IQGAP1	0.333333	TBC1D5	0.0212697	TBC1D5
15411	IL12A	9.12276	SAC3D1	-6604	TMSB15B	8.41538e-05	SOX9	1483	RAD21	0.333333	SSPN	0.0212518	SSPN
15373.1	DRD5	9.10508	CABP4	-6604	SAC3D1	8.41468e-05	MAN1A2	1482	EDNRB	0.333333	DCN	0.0212382	DCN
15357.8	TGFA	9.08578	FRMD5	-6604	CABP4	8.41468e-05	COL15A1	1481	DYRK2	0.333333	TRIO	0.0212228	TRIO
15355.5	RND3	9.0825	RFX1	-6604	FRMD5	8.41326e-05	SPR	1480	CEBPA	0.333333	RND3	0.0212195	RND3
15355.4	PLPP3	9.07674	CCL25	-6604	RFX1	8.41326e-05	NTRK3	1479	RUNX1T1	0.333333	CALD1	0.021206	CALD1
15325.7	TMPO	9.07639	WNT7B	-6604	CCL25	8.41326e-05	RND3	1479	MAD2L1	0.333333	GNAI2	0.0212032	GNAI2
15308.3	COL1A2	9.07626	OGFR	-6604	WNT7B	8.41326e-05	HDAC1	1477	SLCO3A1	0.333333	NTRK3	0.0212024	NTRK3
15284.7	RWDD3	9.07305	MAPK8IP2	-6604	OGFR	8.41184e-05	DNM3	1477	MELK	0.333333	BMP2K	0.021177	BMP2K
15228.8	MTCL1	9.06937	GAST	-6604	MAPK8IP2	8.41114e-05	ADSL	1477	ACTN1	0.333333	GHR	0.0211673	GHR
15217.7	ZFP36L1	9.06078	INS	-6604	GAST	8.41043e-05	MITF	1476	KLF6	0.333333	SOX9	0.0211646	SOX9
15206.3	DNM3	9.0571	C9orf40	-6604	INS	8.40901e-05	CCT7	1474	FHIT	0.333333	EFR3A	0.02114	EFR3A
15198.7	SOX9	9.05656	IL17B	-6604	C9orf40	8.40901e-05	SEL1L	1474	ID4	0.333333	ATP5J	0.0211295	ATP5J
15161.5	MSR1	9.0524	LZTR1	-6604	IL17B	8.4076e-05	ANKH	1473	FGF12	0.333333	CXCR4	0.0211243	CXCR4
15156.1	PROC	9.05147	CTRL	-6604	LZTR1	8.4076e-05	CEBPA	1473	RIN2	0.333333	AFF3	0.0211191	AFF3
15134	PRNP	9.05127	PLCD1	-6604	CTRL	8.4076e-05	PARD3	1473	MYH9	0.333333	ZBTB10	0.0210979	ZBTB10
15130	PTHLH	9.04161	CPEB1	-6604	PLCD1	8.40689e-05	MELK	1472	SOX9	0.333333	PRKCA	0.0210966	PRKCA
15121.9	PTPRZ1	9.03948	GML	-6604	CPEB1	8.40619e-05	TYRP1	1471	MYRIP	0.333333	NEDD9	0.021088	NEDD9
15111.2	IKBKE	9.03774	CIC	-6604	GML	8.40619e-05	GRPEL1	1470	PINK1	0.333333	TIMP4	0.021076	TIMP4
15106.1	MAP1B	9.03549	SLC5A5	-6604	CIC	8.40407e-05	APBB2	1468	ESRRG	0.333333	SH3BP4	0.0210705	SH3BP4
15103.3	GSK3A	9.03471	AQP8	-6604	SLC5A5	8.40336e-05	DEK	1468	SEMA3A	0.333333	FGF9	0.0210532	FGF9
15099.4	CSF3R	9.03134	LIN28A	-6604	AQP8	8.40336e-05	PRKCA	1468	FBL	0.333333	NOLC1	0.021045	NOLC1
15087.3	HTT	9.03039	TENM3	-6604	LIN28A	8.40266e-05	ITPR1	1467	MITF	0.333333	SPRY1	0.0210265	SPRY1
15068.5	CAMK1D	9.02728	ARFRP1	-6604	TENM3	8.40195e-05	KDR	1466	OCA2	0.333333	TLN2	0.0210068	TLN2
15052.3	CLTA	9.01612	ULBP3	-6604	ARFRP1	8.40124e-05	NOLC1	1465	PODXL	0.333333	LMO2	0.020987	LMO2
15037.9	ID4	9.01565	OSBPL10	-6604	ULBP3	8.40124e-05	MAPK1	1463	DEK	0.333333	EPHA4	0.0209778	EPHA4
15002.5	LEF1	9.00919	SPICE1	-6604	OSBPL10	8.40124e-05	CHEK1	1461	NOLC1	0.333333	KDR	0.020976	KDR
15002	PALLD	9.0081	MCRIP2	-6604	SPICE1	8.40054e-05	LMO2	1460	ITPR1	0.333333	MELK	0.0209707	MELK
14970.9	FAM13A	9.00635	MSI1	-6604	MCRIP2	8.39983e-05	ID4	1460	GRB2	0.333333	SRGAP3	0.0209652	SRGAP3
14968.2	PDGFC	9.00607	LPAR6	-6604	MSI1	8.39913e-05	KIT	1459	GPC6	0.333333	IL10RB	0.0209558	IL10RB
14951.1	PLD2	9.00272	LRRC4	-6604	LPAR6	8.39842e-05	ANKRD11	1458	INA	0.333333	MAPK1	0.0209496	MAPK1
14946.2	ARHGAP29	8.99521	GPR153	-6604	LRRC4	8.39842e-05	DLG1	1457	CREB5	0.333333	ID4	0.0209436	ID4
14944.7	TSPAN8	8.99143	DPEP1	-6604	GPR153	8.39772e-05	TBC1D5	1457	RND3	0.333333	MDM4	0.0209432	MDM4
14903.3	KLF5	8.99088	METRN	-6604	DPEP1	8.39701e-05	EFR3A	1456	LEF1	0.333333	GRPEL1	0.0209324	GRPEL1
14893.9	PIM1	8.99044	IFNB1	-6604	METRN	8.39631e-05	LEF1	1456	BIRC3	0.333333	IQGAP1	0.0209227	IQGAP1
14886.2	DYRK2	8.98927	ADGRB1	-6604	IFNB1	8.3956e-05	TRIO	1455	TIMP4	0.333333	RAB31	0.0209118	RAB31
14880.9	KIT	8.98893	HOXC5	-6604	ADGRB1	8.3956e-05	NFKB1	1455	MAP3K5	0.333333	SPTBN1	0.0209065	SPTBN1
14850.7	ITGA10	8.98487	REEP4	-6604	HOXC5	8.3956e-05	PTK2	1454	FKBP1A	0.333333	GFPT1	0.0209031	GFPT1
14849	TG	8.98412	IL17F	-6604	REEP4	8.3949e-05	TSPAN5	1452	ANXA5	0.333333	PARVA	0.0209004	PARVA
14846.2	RUNX1T1	8.98298	HIST1H3E	-6604	IL17F	8.3949e-05	AFF3	1451	MGAT5	0.333333	KIT	0.0208798	KIT
14721	PTPN12	8.97949	NECAB2	-6604	HIST1H3E	8.3949e-05	HSP90AA1	1451	PARVA	0.333333	COPS8	0.0208656	COPS8
14708.7	CYP27A1	8.97068	SLC26A11	-6604	NECAB2	8.39419e-05	FER	1450	PDGFC	0.333333	MAP7	0.0208629	MAP7
14684.2	BARD1	8.96266	ETHE1	-6604	SLC26A11	8.39419e-05	ETV6	1450	NONO	0.333333	LSAMP	0.0208607	LSAMP
14671.3	PARP1	8.95669	DEFB126	-6604	ETHE1	8.39419e-05	SP1	1448	GALC	0.333333	FKBP1A	0.020851	FKBP1A
14665.7	NSG1	8.95345	RFNG	-6604	DEFB126	8.39349e-05	GFPT1	1447	TNFRSF1A	0.333333	EEA1	0.0208055	EEA1
14651.7	KIF2C	8.94538	TAAR1	-6604	RFNG	8.39349e-05	LOXL1	1445	FAS	0.333333	ITSN1	0.0207762	ITSN1
14647.6	MAD2L1	8.93906	TAZ	-6604	TAAR1	8.39349e-05	MGST2	1445	CDC7	0.333333	AP2B1	0.0207422	AP2B1
14646.9	PDGFD	8.93717	LACC1	-6604	TAZ	8.39208e-05	FGF9	1444	NEDD9	0.333333	EXOC4	0.0207201	EXOC4
14628.6	GRPEL1	8.93551	RABL2A	-6604	LACC1	8.39208e-05	FAP	1443	DLG1	0.333333	RNF144A	0.0207021	RNF144A
14594.5	PYGL	8.93168	LIX1	-6604	RABL2A	8.39208e-05	ZWINT	1442	GNAI1	0.333333	DYRK1A	0.0206976	DYRK1A
14590.7	SMAD1	8.93152	C6orf47	-6604	LIX1	8.39137e-05	ESR1	1441	RABGAP1L	0.333333	C9orf3	0.0206858	C9orf3
14576.3	MGAT5	8.92433	CRISP2	-6604	C6orf47	8.39067e-05	ANXA5	1441	SEL1L	0.333333	RUNX1	0.0206816	RUNX1
14568.5	TP53	8.91362	NAT8L	-6604	CRISP2	8.38926e-05	MME	1441	RAP1B	0.333333	TSPAN5	0.0206793	TSPAN5
14553.6	SLCO3A1	8.91275	TNFSF14	-6604	NAT8L	8.38926e-05	ANXA4	1441	HLA-DRA	0.333333	AK3	0.0206762	AK3
14552.1	CDH2	8.9125	PFKFB2	-6604	TNFSF14	8.38856e-05	SRGAP3	1441	ITGB1	0.333333	LEF1	0.0206723	LEF1
14547.2	BIRC3	8.91168	SIDT2	-6604	PFKFB2	8.38785e-05	DAP	1441	PLK1	0.333333	ANXA5	0.0206723	ANXA5
14536.3	ZWINT	8.90974	ZMYND10	-6604	SIDT2	8.38785e-05	DCN	1440	CKS2	0.333333	VRK1	0.0206681	VRK1
14521.1	MELK	8.90962	PIDD1	-6604	ZMYND10	8.38715e-05	ITSN1	1439	EFR3A	0.333333	SORL1	0.0206657	SORL1
14502.5	MAP2K5	8.90876	ZNF552	-6604	PIDD1	8.38715e-05	BMP2K	1438	TRIO	0.333333	TYRP1	0.0206593	TYRP1
14499.8	CHEK1	8.90574	SLC6A19	-6604	ZNF552	8.38645e-05	SLC6A13	1437	KLF5	0.333333	MMD	0.0206387	MMD
14498.7	CREB5	8.90416	AFTPH	-6604	SLC6A19	8.38645e-05	IL12A	1436	CADM1	0.333333	SC5D	0.0206333	SC5D
14497.4	CETN3	8.90321	REEP6	-6604	AFTPH	8.38645e-05	TFAP2C	1436	FAP	0.333333	LMO3	0.0206286	LMO3
14491.1	TNFRSF1A	8.89938	SLC18A1	-6604	REEP6	8.38645e-05	TLN2	1435	PDGFRB	0.333333	SUMO1	0.0206253	SUMO1
14487	FOXA1	8.885	GALK1	-6604	SLC18A1	8.38574e-05	NSG1	1434	ETV6	0.333333	MPDZ	0.0206252	MPDZ
14486	PDE4D	8.87988	KCNK10	-6604	GALK1	8.38574e-05	SNW1	1434	MAP7	0.333333	ANKRD11	0.0206162	ANKRD11
14481.5	FOSL1	8.87944	PLIN5	-6604	KCNK10	8.38504e-05	ZBTB10	1433	QKI	0.333333	ETV6	0.0206135	ETV6
14473.3	NAV2	8.87897	HIST2H4A	-6604	PLIN5	8.38434e-05	SORL1	1433	CD34	0.333333	INA	0.0205948	INA
14463.2	DENND1A	8.87633	SLC39A4	-6604	HIST2H4A	8.38434e-05	SPRY1	1432	MGST2	0.333333	PINK1	0.0205743	PINK1
14452.2	SNW1	8.87143	MRGPRX1	-6604	SLC39A4	8.38434e-05	CALD1	1432	MCM6	0.333333	FAP	0.0205674	FAP
14445.8	SRGAP3	8.87048	LTA	-6604	MRGPRX1	8.38293e-05	VPS13C	1431	CAMK1D	0.333333	USP9X	0.0205353	USP9X
14414.5	WASF2	8.86658	NPM2	-6604	LTA	8.38223e-05	RWDD3	1431	CLTA	0.333333	IVNS1ABP	0.0205347	IVNS1ABP
14405	STIM1	8.86218	BAIAP2L2	-6604	NPM2	8.38223e-05	DYRK1A	1431	PARP1	0.333333	TMEM135	0.0205156	TMEM135
14388	GCA	8.86202	DAGLB	-6604	BAIAP2L2	8.38223e-05	KLF5	1430	FGF9	0.333333	ANXA4	0.020486	ANXA4
14359.3	CDC7	8.86185	MCHR1	-6604	DAGLB	8.38223e-05	EPHA4	1430	EPHA4	0.333333	IQCK	0.0204774	IQCK
14356.2	PCNA	8.8552	H3F3B	-6604	MCHR1	8.38153e-05	NEDD9	1429	PARD3	0.333333	CEBPA	0.0204773	CEBPA
14354.8	CD34	8.85245	HTRA2	-6604	H3F3B	8.38082e-05	C9orf3	1429	SERPING1	0.333333	GAS7	0.0204711	GAS7
14342.4	ANXA5	8.84315	SYNGR3	-6604	HTRA2	8.38082e-05	MPDZ	1427	LMO2	0.333333	DAB2	0.020469	DAB2
14331.4	ANKH	8.84293	OPN1SW	-6604	SYNGR3	8.38082e-05	FUT8	1425	TSPAN5	0.333333	NEDD4L	0.0204655	NEDD4L
14324.5	KLF6	8.82669	PHF20	-6604	OPN1SW	8.38012e-05	PIM1	1424	EEA1	0.333333	NSG1	0.0204638	NSG1
14315.9	HNRNPA2B1	8.82635	HIST1H4H	-6604	PHF20	8.38012e-05	MAP7	1424	PTPRZ1	0.333333	SP1	0.0204279	SP1
14303.7	RNF144A	8.82265	KIF21B	-6604	HIST1H4H	8.37942e-05	AP2B1	1424	CDK2	0.333333	CTDSPL	0.0204244	CTDSPL
14301.9	SERPING1	8.82239	DNMT3B	-6604	KIF21B	8.37942e-05	EEA1	1422	ITSN1	0.333333	NREP	0.020416	NREP
14284.5	FGF9	8.82231	CRYGC	-6604	DNMT3B	8.37942e-05	MAD2L1	1422	CDK1	0.333333	DYNLT3	0.0203991	DYNLT3
14278.5	NOL8	8.82187	SLC43A1	-6604	CRYGC	8.37872e-05	IQGAP1	1419	MAN1A2	0.333333	MYLK	0.0203969	MYLK
14278.5	DYRK1A	8.81851	KIR2DS2	-6604	SLC43A1	8.37802e-05	GAS7	1419	TBC1D5	0.333333	IL12A	0.0203959	IL12A
14274.4	PSMD14	8.81661	ERVW-1	-6604	KIR2DS2	8.37802e-05	LSAMP	1419	BMP2K	0.333333	TFAP2C	0.0203785	TFAP2C
14264.4	AFF3	8.81638	GMEB2	-6604	ERVW-1	8.37802e-05	COPS8	1419	AP2B1	0.333333	RAP1B	0.0203757	RAP1B
14258.1	GAS7	8.81609	FAM83A	-6604	GMEB2	8.37802e-05	PARVA	1418	NTRK3	0.333333	TCF12	0.0203623	TCF12
14247.9	MAPK1	8.81599	ROGDI	-6604	FAM83A	8.37802e-05	RAD21	1418	RUNX1	0.333333	MEF2C	0.0203571	MEF2C
14231.3	ASS1	8.80466	SLC52A1	-6604	ROGDI	8.37731e-05	TGFA	1418	MAPKAPK3	0.333333	CAV1	0.0203274	CAV1
14225.6	USP9X	8.80227	TNFSF15	-6604	SLC52A1	8.37731e-05	CSF3R	1417	NAV2	0.333333	HCLS1	0.020313	HCLS1
14224.6	MAPKAPK3	8.7997	RAB3D	-6604	TNFSF15	8.37661e-05	HNRNPAB	1416	TYRP1	0.333333	MME	0.0203078	MME
14205.2	PARD3	8.79915	ANKRD36B	-6604	RAB3D	8.37661e-05	MKI67	1415	SPR	0.333333	TSHZ2	0.0203051	TSHZ2
14205.1	ICOS	8.79678	NRG3	-6604	ANKRD36B	8.37661e-05	RAB31	1414	DNM3	0.333333	ERG	0.020302	ERG
14175	DAAM1	8.79632	MIIP	-6604	NRG3	8.37661e-05	CD34	1413	EP300	0.333333	MYC	0.0202964	MYC
14166.4	ANXA4	8.79246	HAVCR1	-6604	MIIP	8.37661e-05	RAP1B	1412	MME	0.333333	CHEK1	0.0202901	CHEK1
14160.9	ETV6	8.79245	FAM20C	-6604	HAVCR1	8.37591e-05	PTPRZ1	1412	MGP	0.333333	ARHGAP24	0.0202749	ARHGAP24
14160.7	DLC1	8.79102	ZNF580	-6604	FAM20C	8.37591e-05	LMO3	1412	MCM4	0.333333	MKI67	0.0202701	MKI67
14145.6	PIP4K2A	8.79102	DUSP9	-6604	ZNF580	8.37591e-05	BARD1	1411	BIRC2	0.333333	GAB2	0.0202593	GAB2
14130.1	SRSF11	8.7903	SPANXC	-6604	DUSP9	8.37521e-05	MAPKAP1	1410	GFPT1	0.333333	PDE5A	0.0202508	PDE5A
14128.6	MGLL	8.78313	RAC3	-6604	SPANXC	8.37521e-05	BIRC3	1409	DENND1A	0.333333	MYH10	0.0202507	MYH10
14097.9	RNF4	8.78084	COMTD1	-6604	RAC3	8.37521e-05	CDK4	1408	TFAP2C	0.333333	ZWINT	0.0202506	ZWINT
14094.3	MAPKAP1	8.77854	DAPL1	-6604	COMTD1	8.37521e-05	FKBP1A	1408	SOS1	0.333333	PIP5K1B	0.0202364	PIP5K1B
14059.7	ALPP	8.7762	ARNT2	-6604	DAPL1	8.37451e-05	CLIC4	1407	DYRK1A	0.333333	PKN2	0.0202194	PKN2
14052.8	RABGAP1L	8.77588	HECTD1	-6604	ARNT2	8.37381e-05	PYGL	1406	GRPEL1	0.333333	ADAMTS1	0.020216	ADAMTS1
14038.8	FER	8.77584	KCNK17	-6604	HECTD1	8.37381e-05	SERPING1	1406	TGFA	0.333333	ATP2B1	0.0202124	ATP2B1
14038.5	FAP	8.77485	ATP2A1	-6604	KCNK17	8.37381e-05	SH3BP4	1406	GAB2	0.333333	KLF5	0.0202044	KLF5
14015.4	DAB2	8.77453	TNRC18	-6604	ATP2A1	8.37311e-05	TGFBI	1406	SRC	0.333333	SMS	0.0201915	SMS
14011.7	ANXA1	8.76211	MUC16	-6604	TNRC18	8.3724e-05	DAB2	1404	APBB2	0.333333	TGFBI	0.0201712	TGFBI
13981.2	PLK1	8.76007	TBC1D17	-6604	MUC16	8.3724e-05	SSPN	1403	MKI67	0.333333	RWDD3	0.0201708	RWDD3
13975.9	TPO	8.7598	P2RX6	-6604	TBC1D17	8.3717e-05	MAP2K5	1403	DAB2	0.333333	ANXA1	0.0201339	ANXA1
13944.5	CAPNS1	8.75762	CDSN	-6604	P2RX6	8.3717e-05	NEDD4L	1403	TCF12	0.333333	ANK2	0.0201306	ANK2
13935.7	MAN1A2	8.75433	IL9R	-6604	CDSN	8.371e-05	GAB2	1403	AHCY	0.333333	ACTN1	0.0201293	ACTN1
13930.5	CDH11	8.75304	EFNA4	-6604	IL9R	8.371e-05	MDM4	1402	ANXA4	0.333333	MAP2K5	0.0201274	MAP2K5
13928.2	BIRC2	8.74283	SLC25A22	-6604	EFNA4	8.3703e-05	ANXA1	1401	CSF3R	0.333333	RET	0.0201256	RET
13924.7	CTNNA1	8.74195	EMC6	-6604	SLC25A22	8.3703e-05	SPTBN1	1400	IARS	0.333333	MAPKAP1	0.0201234	MAPKAP1
13923.2	ITSN1	8.7393	HOXB9	-6604	EMC6	8.3696e-05	MXI1	1399	SPRY1	0.333333	IL7	0.0201225	IL7
13919.4	SORL1	8.733	LCMT1	-6604	HOXB9	8.3689e-05	RUNX1	1399	MPDZ	0.333333	SOS1	0.0201219	SOS1
13899.3	PCBP3	8.72931	INPP5K	-6604	LCMT1	8.3682e-05	AK3	1399	NR3C1	0.333333	ATP6AP2	0.0201166	ATP6AP2
13893.6	FAS	8.72878	MBLAC2	-6604	INPP5K	8.3682e-05	NONO	1398	FER	0.333333	NTRK1	0.0201105	NTRK1
13893.6	CUL3	8.72864	SLC22A10	-6604	MBLAC2	8.3675e-05	UCHL1	1397	MDM4	0.333333	ROR1	0.0201036	ROR1
13871.2	RAD21	8.72258	RPS6KA4	-6604	SLC22A10	8.3675e-05	CTDSPL	1396	ANKH	0.333333	FLRT2	0.0200977	FLRT2
13863.3	MRC2	8.72175	QSER1	-6604	RPS6KA4	8.3668e-05	YWHAZ	1396	ANKRD11	0.333333	UCHL1	0.0200951	UCHL1
13857.5	KDR	8.7195	SPRY3	-6604	QSER1	8.3661e-05	ICOS	1396	HNRNPAB	0.333333	YWHAZ	0.0200903	YWHAZ
13857.2	ARHGAP21	8.71948	ABCA7	-6604	SPRY3	8.3654e-05	FTL	1396	EIF4E	0.333333	PTPRZ1	0.0200512	PTPRZ1
13853	MPDZ	8.71754	TCFL5	-6604	ABCA7	8.3654e-05	MAPKAPK3	1395	LOXL1	0.333333	TUSC3	0.0200438	TUSC3
13846.5	ITPR1	8.71165	FAM83D	-6604	TCFL5	8.3654e-05	HLA-DRA	1395	RBBP4	0.333333	SPR	0.0200269	SPR
13845.4	GNAI1	8.70698	CEP19	-6604	FAM83D	8.3647e-05	USP9X	1393	SSPN	0.333333	SSR1	0.0200171	SSR1
13841	HLA-DRA	8.70513	MACROD1	-6604	CEP19	8.3647e-05	SMS	1391	FUT8	0.333333	LMO7	0.0200121	LMO7
13826.7	PPP2R5C	8.69992	MSTN	-6604	MACROD1	8.364e-05	MYH9	1390	TLN2	0.333333	ICOS	0.0200048	ICOS
13769.6	RBBP8	8.69948	MICA	-6604	MSTN	8.3633e-05	RNF144A	1390	IKBKE	0.333333	SNRPB	0.0199937	SNRPB
13763.6	SOX1	8.69917	TIGD2	-6604	MICA	8.3626e-05	MTCL1	1388	LMO3	0.333333	LHFP	0.0199929	LHFP
13761.2	COL15A1	8.69781	AJAP1	-6604	TIGD2	8.3626e-05	ACTN1	1388	SPTBN1	0.333333	LOXL1	0.0199909	LOXL1
13760.6	TERF2IP	8.6965	CCL3L1	-6604	AJAP1	8.3619e-05	PIP5K1B	1388	XRCC5	0.333333	MAP3K5	0.0199769	MAP3K5
13755.7	SPTA1	8.69605	DHX58	-6604	CCL3L1	8.3612e-05	GNAI1	1388	IFI16	0.333333	ADAM9	0.0199741	ADAM9
13753.5	DLG1	8.69586	PHF19	-6604	DHX58	8.3612e-05	HNRNPA2B1	1387	SORL1	0.333333	HSP90AA1	0.0199641	HSP90AA1
13751	RELN	8.69549	BTBD2	-6604	PHF19	8.3605e-05	MMD	1386	MXI1	0.333333	GNAI1	0.0199619	GNAI1
13743.4	TLN2	8.69528	ABCB9	-6604	BTBD2	8.35981e-05	MGP	1386	MCM3	0.333333	LMAN1	0.0199613	LMAN1
13743.2	LMO2	8.69435	STYXL1	-6604	ABCB9	8.35981e-05	PDE5A	1385	AFF3	0.333333	EPB41L3	0.0199537	EPB41L3
13738.4	RIN2	8.69327	IFT27	-6604	STYXL1	8.35981e-05	PARP1	1385	ITGA6	0.333333	SLC6A13	0.0199518	SLC6A13
13731.2	UCHL1	8.6916	IL1F10	-6604	IFT27	8.35981e-05	PCNA	1383	DAP	0.333333	TLK2	0.0199464	TLK2
13725.1	TBC1D5	8.69011	HOXC11	-6604	IL1F10	8.35911e-05	IKBKE	1383	RET	0.333333	TGFA	0.0199313	TGFA
13721.8	SPRY1	8.68958	TCF19	-6604	HOXC11	8.35841e-05	TCF12	1382	MAP2K5	0.333333	SNW1	0.0199288	SNW1
13721.4	AK3	8.68753	HR	-6604	TCF19	8.35841e-05	CAV1	1381	RAB31	0.333333	KIRREL3	0.019916	KIRREL3
13714	ESRRG	8.68597	IFNA2	-6604	HR	8.35771e-05	LMO7	1381	CBL	0.333333	PDZD2	0.0199153	PDZD2
13712	IL15	8.68284	SENP5	-6604	IFNA2	8.35701e-05	TNFRSF1A	1381	CDC6	0.333333	ADRB2	0.0199141	ADRB2
13690	MSX1	8.68212	MOGS	-6604	SENP5	8.35631e-05	IVNS1ABP	1380	PIM1	0.333333	MGST2	0.0199102	MGST2
13686.7	MTTP	8.6808	SPNS2	-6604	MOGS	8.35631e-05	RET	1380	COPS8	0.333333	EGLN3	0.0199099	EGLN3
13668.7	CORO2B	8.67924	ADHFE1	-6604	SPNS2	8.35561e-05	GRM4	1379	IL12A	0.333333	RAD21	0.0198812	RAD21
13658.3	SMAD6	8.67616	RGS11	-6604	ADHFE1	8.35492e-05	SELENBP1	1379	TGFBI	0.333333	PIM1	0.0198764	PIM1
13650.5	PTK2	8.67556	PLCD3	-6604	RGS11	8.35492e-05	SEL1L3	1379	ANXA1	0.333333	ZNF385B	0.0198428	ZNF385B
13636	EMP3	8.67198	NECTIN4	-6604	PLCD3	8.35492e-05	ADRB2	1379	MEF2C	0.333333	ADSL	0.0198409	ADSL
13635.4	NEDD4L	8.67114	NRTN	-6604	NECTIN4	8.35492e-05	DYNLT3	1379	SMAD6	0.333333	USP47	0.0198361	USP47
13630.6	RAP1B	8.66345	IPO13	-6604	NRTN	8.35422e-05	FAS	1378	GAS7	0.333333	MORC4	0.019835	MORC4
13628.7	LMO3	8.66294	WDR19	-6604	IPO13	8.35352e-05	EPB41L3	1377	TGFBR1	0.333333	COL18A1	0.0198259	COL18A1
13627.6	EFR3A	8.66239	CD8B	-6604	WDR19	8.35352e-05	NREP	1376	PDE5A	0.333333	CD34	0.0198245	CD34
13622.3	GAB2	8.65932	SPAG4	-6604	CD8B	8.35352e-05	SC5D	1376	LMAN1	0.333333	DEK	0.0198075	DEK
13619.3	GALC	8.65651	RC3H1	-6604	SPAG4	8.35282e-05	MYLK	1376	VCP	0.333333	NFKB1	0.0198014	NFKB1
13615.7	CADM1	8.65554	EFCAB7	-6604	RC3H1	8.35213e-05	CMSS1	1376	SMC3	0.333333	NONO	0.0197913	NONO
13614	NDN	8.65129	TUBA8	-6604	EFCAB7	8.35143e-05	TLK2	1375	NEDD4L	0.333333	HIPK1	0.0197892	HIPK1
13607.1	FAM189A2	8.64601	HIST1H4C	-6604	TUBA8	8.35073e-05	IL7	1375	USP9X	0.333333	MYO1B	0.0197704	MYO1B
13582	ASIC2	8.64597	ZNF574	-6604	HIST1H4C	8.35003e-05	ATP6AP2	1373	SRGAP3	0.333333	NRIP1	0.0197319	NRIP1
13580.8	LSAMP	8.64524	FAM117A	-6604	ZNF574	8.35003e-05	LMAN1	1373	SC5D	0.333333	TP53I11	0.0197314	TP53I11
13577.9	AP2B1	8.64469	NARF	-6604	FAM117A	8.35003e-05	ERG	1372	MAPKAP1	0.333333	MTCL1	0.0197192	MTCL1
13577.6	MITF	8.64401	DFFB	-6604	NARF	8.35003e-05	BIRC2	1372	SMS	0.333333	BIRC3	0.0197081	BIRC3
13577.3	MKI67	8.64079	C1QTNF8	-6604	DFFB	8.35003e-05	SOS1	1372	NREP	0.333333	GRK5	0.0197059	GRK5
13576.2	CTH	8.63054	SEC14L2	-6604	C1QTNF8	8.35003e-05	MAP3K5	1372	PDGFD	0.333333	XRCC5	0.0197035	XRCC5
13556.3	LMO7	8.62906	GOLGA8A	-6604	SEC14L2	8.34934e-05	FANCC	1371	ZBTB10	0.333333	BARD1	0.019686	BARD1
13551.7	TRIO	8.62829	RAB27B	-6604	GOLGA8A	8.34934e-05	TSPAN8	1371	CLIC4	0.333333	CENPU	0.0196856	CENPU
13542.3	ISLR	8.62775	GPER1	-6604	RAB27B	8.34934e-05	PKN2	1370	NSG1	0.333333	SEL1L3	0.0196833	SEL1L3
13541.4	BMP2K	8.61953	UBC	-6604	GPER1	8.34864e-05	ANK2	1370	RWDD3	0.333333	STAG1	0.0196825	STAG1
13522.7	MYH9	8.61898	CARD14	-6604	UBC	8.34864e-05	MEF2C	1370	PIP5K1B	0.333333	RAD51B	0.0196819	RAD51B
13521.7	COL11A1	8.61393	PDK2	-6604	CARD14	8.34794e-05	PSMD14	1369	PYGL	0.333333	PTBP2	0.0196793	PTBP2
13501	MCM4	8.6126	S1PR5	-6604	PDK2	8.34725e-05	EXOC4	1369	TLK2	0.333333	ALCAM	0.0196767	ALCAM
13478.3	VCP	8.61213	CORO6	-6604	S1PR5	8.34725e-05	FBL	1369	COL11A1	0.333333	CSF3R	0.0196673	CSF3R
13478	SEL1L3	8.605	NEUROG1	-6604	CORO6	8.34655e-05	TUSC3	1368	C9orf3	0.333333	SOX4	0.0196641	SOX4
13448.4	SMS	8.6039	MYOD1	-6604	NEUROG1	8.34655e-05	XRCC5	1367	SH3BP4	0.333333	CD55	0.0196478	CD55
13432.8	MYOM2	8.60319	IL9	-6604	MYOD1	8.34585e-05	ROR1	1367	PTK2B	0.333333	ESR1	0.0196431	ESR1
13430.3	TGFBI	8.60205	RAB25	-6604	IL9	8.34516e-05	HTT	1366	HTT	0.333333	FLT1	0.0196345	FLT1
13414.2	FTL	8.59972	TMEM63A	-6604	RAB25	8.34516e-05	SMAD6	1365	RNF144A	0.333333	DAP	0.0196248	DAP
13410.8	TGFBR1	8.59927	INSRR	-6604	TMEM63A	8.34446e-05	ARHGAP24	1363	AK3	0.333333	SALL1	0.0196231	SALL1
13404.7	TCF12	8.59105	COASY	-6604	INSRR	8.34446e-05	ADAM9	1363	SMURF2	0.333333	DLGAP1	0.0196212	DLGAP1
13398	RUNX1	8.59066	GAL3ST1	-6604	COASY	8.34446e-05	COL11A1	1363	KIFAP3	0.333333	OTUD4	0.0196109	OTUD4
13383.7	CKS2	8.5901	NME3	-6604	GAL3ST1	8.34446e-05	CD55	1362	COL18A1	0.333333	ARHGAP20	0.0196088	ARHGAP20
13382.3	NCOA3	8.58064	NDUFA3	-6604	NME3	8.34446e-05	COL18A1	1362	PTGIS	0.333333	PTGIS	0.0195939	PTGIS
13378.7	DNAJA1	8.57975	SEMA6B	-6604	NDUFA3	8.34446e-05	CDC7	1362	SRSF11	0.333333	MXI1	0.019592	MXI1
13352.7	TRIP10	8.57804	WNT1	-6604	SEMA6B	8.34376e-05	ATP2B1	1362	FLNA	0.333333	SLC4A4	0.0195847	SLC4A4
13346.7	APBB2	8.57721	SERPINI2	-6604	WNT1	8.34376e-05	IFI16	1361	PKN2	0.333333	TRIM2	0.0195772	TRIM2
13300	GPD1L	8.57632	ANKS4B	-6604	SERPINI2	8.34307e-05	WASF2	1361	SPP1	0.333333	ITGA6	0.0195732	ITGA6
13296.9	SOX2	8.57612	PEG10	-6604	ANKS4B	8.34307e-05	TSHZ2	1361	CBFB	0.333333	MYH9	0.0195688	MYH9
13274.7	SLC12A2	8.57583	PMEL	-6604	PEG10	8.34307e-05	CEBPD	1360	MYLK	0.333333	SMAD6	0.0195688	SMAD6
13266.2	SMIM10L2A	8.5696	PHLDB1	-6604	PMEL	8.34237e-05	USP47	1360	IL7	0.333333	CXADR	0.0195604	CXADR
13256.7	C9orf3	8.56856	TERT	-6604	PHLDB1	8.34237e-05	SPP1	1360	ROR1	0.333333	FTL	0.0195376	FTL
13246.2	FCGRT	8.56476	SIN3B	-6604	TERT	8.34168e-05	PHGDH	1360	ATP2B1	0.333333	PTPRG	0.0195364	PTPRG
13243.7	AHCY	8.56389	TSPAN33	-6604	SIN3B	8.34168e-05	GRK5	1360	RBM39	0.333333	PYGL	0.0195298	PYGL
13239.1	COX5A	8.56365	ATF6B	-6604	TSPAN33	8.34168e-05	MCM4	1357	SLC6A13	0.333333	CMSS1	0.0195181	CMSS1
13236.2	ABCG2	8.56148	CYP27B1	-6604	ATF6B	8.34098e-05	GPD1L	1357	FTL	0.333333	KLF9	0.0195151	KLF9
13223.5	EEA1	8.55657	NOS2	-6604	CYP27B1	8.34098e-05	TMEM135	1357	KLF9	0.333333	WDR26	0.0195134	WDR26
13209.9	MAP7	8.55602	SNCG	-6604	NOS2	8.34098e-05	CENPU	1357	F13A1	0.333333	PDE4DIP	0.0195122	PDE4DIP
13208.6	EPHA4	8.55001	HIST1H3J	-6604	SNCG	8.34098e-05	MYH10	1356	ADRB2	0.333333	CRIM1	0.0195101	CRIM1
13194.9	SNRPA	8.54522	DVL1	-6604	HIST1H3J	8.33959e-05	SLC4A4	1355	LMO7	0.333333	NR3C1	0.0195035	NR3C1
13180.5	RAD51B	8.54165	BRMS1	-6604	DVL1	8.33959e-05	SSR1	1355	GRK5	0.333333	COL11A1	0.0194986	COL11A1
13144.7	PDE5A	8.54086	BBS4	-6604	BRMS1	8.33889e-05	MSX1	1355	IGF1R	0.333333	FAS	0.0194861	FAS
13142.3	GAPDH	8.53954	MYT1	-6604	BBS4	8.33889e-05	IQCK	1354	CTDSPL	0.333333	CEBPD	0.0194852	CEBPD
13139.6	CTNNBIP1	8.53835	TENM2	-6604	MYT1	8.3382e-05	GREM1	1354	HDAC2	0.333333	TPK1	0.0194812	TPK1
13132.6	SMO	8.53282	ABCC12	-6604	TENM2	8.3382e-05	RNF4	1353	LSAMP	0.333333	MAPKAPK3	0.0194798	MAPKAPK3
13124.2	ANKRD12	8.52944	ABCA13	-6604	ABCC12	8.3375e-05	IL15	1353	CD55	0.333333	CHL1	0.0194749	CHL1
13116.2	CPB2	8.52863	TSHB	-6604	ABCA13	8.3375e-05	PDE4DIP	1353	GRIN2B	0.333333	GRIN2B	0.0194737	GRIN2B
13113.9	ANK2	8.52848	MAP1LC3A	-6604	TSHB	8.3375e-05	OIP5	1352	CTH	0.333333	MSX1	0.0194669	MSX1
13103.6	CTDSPL	8.52334	FJX1	-6604	MAP1LC3A	8.33681e-05	KIRREL3	1351	HIF1A	0.333333	TNFRSF21	0.0194627	TNFRSF21
13103.4	PDE4DIP	8.52227	ANKRD2	-6604	FJX1	8.33681e-05	RFTN1	1351	HNRNPF	0.333333	ANKRD12	0.0194587	ANKRD12
13089.8	ADRB2	8.52065	NUDT6	-6604	ANKRD2	8.33681e-05	PDGFD	1350	ERG	0.333333	RNF4	0.0194583	RNF4
13077.4	HADH	8.52015	GCAT	-6604	NUDT6	8.33681e-05	AHCY	1349	MTCL1	0.333333	SMURF2	0.0194579	SMURF2
13076	EDNRB	8.51937	SVIP	-6604	GCAT	8.33611e-05	TP53I11	1349	TSPAN8	0.333333	TSPAN8	0.0194439	TSPAN8
13073.4	LYN	8.51701	BAIAP3	-6604	SVIP	8.33611e-05	GCA	1349	ADAMTS1	0.333333	CD59	0.0194341	CD59
13065.1	RET	8.51645	POLL	-6604	BAIAP3	8.33611e-05	EGLN3	1347	GSK3A	0.333333	ZDHHC14	0.0194338	ZDHHC14
13063.4	ZBTB10	8.51501	USP36	-6604	POLL	8.33611e-05	PDGFRB	1347	FLT1	0.333333	CAPRIN1	0.0194238	CAPRIN1
13063.3	GRK5	8.51445	BMP15	-6604	USP36	8.33542e-05	DNAJA1	1347	DHX15	0.333333	MAN2A1	0.019413	MAN2A1
13057.6	PIP5K1B	8.51312	NRARP	-6604	BMP15	8.33542e-05	MORC4	1347	MAPK3	0.333333	LMBRD1	0.0194124	LMBRD1
13041.1	LMAN1	8.51301	RIPPLY3	-6604	NRARP	8.33542e-05	LYN	1346	MMD	0.333333	CBL	0.0193909	CBL
13022.3	FOXC1	8.50991	HIC1	-6604	RIPPLY3	8.33472e-05	CTH	1345	CENPU	0.333333	JAZF1	0.0193897	JAZF1
13019.9	MAP3K5	8.50918	MYBL1	-6604	HIC1	8.33472e-05	SALL1	1345	NCOA3	0.333333	SMYD3	0.0193817	SMYD3
13006.2	NOLC1	8.50867	SLC6A16	-6604	MYBL1	8.33472e-05	PTGIS	1344	PAK2	0.333333	PAK2	0.0193761	PAK2
12992.4	RAB31	8.50847	BIVM	-6604	SLC6A16	8.33403e-05	VCP	1343	EPB41L3	0.333333	SLC8A1	0.019374	SLC8A1
12977.5	GPER1	8.50491	CHAC1	-6604	BIVM	8.33403e-05	EIF4E	1341	DYNLT3	0.333333	TRPM3	0.0193679	TRPM3
12975.3	IFI16	8.50276	CNPY2	-6604	CHAC1	8.33333e-05	GSK3A	1341	YWHAH	0.333333	BIRC2	0.0193529	BIRC2
12974.1	SPP1	8.50135	CLEC5A	-6604	CNPY2	8.33333e-05	ADAMTS1	1340	ICOS	0.333333	GRM4	0.0193529	GRM4
12972.4	GRB2	8.49852	LRRC8A	-6604	CLEC5A	8.33264e-05	KLF9	1340	ADAM9	0.333333	PCDH9	0.0193457	PCDH9
12965.6	EPB41L3	8.49709	HES5	-6604	LRRC8A	8.33194e-05	DLGAP1	1340	NUP153	0.333333	HDAC1	0.0193424	HDAC1
12939.9	SEL1L	8.49603	MICU3	-6604	HES5	8.33194e-05	GRIN2B	1339	GRM4	0.333333	TPD52L1	0.0193349	TPD52L1
12909.3	USP47	8.49476	CTCFL	-6604	MICU3	8.33194e-05	NRIP1	1339	FANCC	0.333333	NEK7	0.0193338	NEK7
12905.4	COPS8	8.4933	SLCO6A1	-6604	CTCFL	8.33125e-05	STIM1	1339	CD59	0.333333	MAD2L1	0.0193291	MAD2L1
12900.3	PCSK1	8.49266	INHBC	-6604	SLCO6A1	8.33056e-05	SLC8A1	1339	CTGF	0.333333	GPD1L	0.0193263	GPD1L
12893.6	BMP7	8.49117	CRYBA4	-6604	INHBC	8.33056e-05	TGFBR1	1339	HMGB2	0.333333	ME3	0.0193183	ME3
12892.6	CCNG1	8.48815	ASNA1	-6604	CRYBA4	8.32986e-05	SMYD3	1338	MYH10	0.333333	RBM39	0.0193129	RBM39
12891.2	DSC3	8.48789	RSAD1	-6604	ASNA1	8.32986e-05	CD59	1338	SSR1	0.333333	KIF5B	0.0193125	KIF5B
12861.5	PARVA	8.48328	PFKFB4	-6604	RSAD1	8.32917e-05	RAD51B	1338	GCA	0.333333	IGF1R	0.0192885	IGF1R
12856.7	SFN	8.48007	TLX2	-6604	PFKFB4	8.32848e-05	PRKAR2B	1338	NRIP1	0.333333	TLR4	0.0192845	TLR4
12841.6	MDM4	8.47785	CACNA1A	-6604	TLX2	8.32848e-05	CXADR	1337	UCHL1	0.333333	ZCCHC7	0.0192817	ZCCHC7
12816.2	YWHAH	8.47723	TESC	-6604	CACNA1A	8.32848e-05	STAG1	1337	IVNS1ABP	0.333333	NLK	0.0192657	NLK
12801.3	CD38	8.4767	LRG1	-6604	TESC	8.32778e-05	TG	1337	TUSC3	0.333333	KIFAP3	0.0192539	KIFAP3
12797.6	TGFB2	8.47295	WNT10B	-6604	LRG1	8.32778e-05	TRIM2	1337	CEBPD	0.333333	SERPING1	0.0192527	SERPING1
12790.2	SLC8A1	8.47087	RRAGA	-6604	WNT10B	8.32778e-05	SMURF2	1337	ATM	0.333333	SLC9A9	0.0192514	SLC9A9
12776.1	PRKAR2B	8.47009	SLC6A9	-6604	RRAGA	8.32778e-05	RBM39	1336	MSX1	0.333333	HACD2	0.0192373	HACD2
12775.9	PDGFRB	8.46869	PNPLA2	-6604	SLC6A9	8.32709e-05	F13A1	1336	IRS1	0.333333	SH3D19	0.0192338	SH3D19
12773.7	ACTN1	8.4672	ALPP	-6604	PNPLA2	8.32639e-05	CNTN2	1335	ILK	0.333333	ALOX5	0.0192201	ALOX5
12756.6	KIRREL3	8.46431	CASKIN2	-6604	ALPP	8.32639e-05	MRC2	1334	SEL1L3	0.333333	MTHFD1L	0.0192112	MTHFD1L
12749.7	ILK	8.46414	ALS2CL	-6604	CASKIN2	8.32639e-05	SEC31A	1334	SALL1	0.333333	WASF2	0.0192097	WASF2
12749	FGA	8.46289	CAMP	-6604	ALS2CL	8.32639e-05	PTBP2	1334	ALCAM	0.333333	SPP1	0.0191996	SPP1
12737.1	APOB	8.4616	ZNF589	-6604	CAMP	8.32639e-05	PDZD2	1331	ATP6AP2	0.333333	SEC31A	0.0191971	SEC31A
12730.5	SGCD	8.46137	C1QTNF1	-6604	ZNF589	8.32639e-05	ITGA6	1331	HCK	0.333333	IFI16	0.0191901	IFI16
12719	VPS13C	8.45342	GRPR	-6604	C1QTNF1	8.3257e-05	CYP27A1	1329	PTGS2	0.333333	IGF2BP2	0.0191893	IGF2BP2
12717.1	FKBP1A	8.44804	LDLRAP1	-6604	GRPR	8.3257e-05	PAK2	1328	CHL1	0.333333	PDGFRB	0.0191881	PDGFRB
12704.7	OAT	8.43952	RASSF8	-6604	LDLRAP1	8.3257e-05	LHFP	1327	ALOX5	0.333333	DCBLD2	0.0191819	DCBLD2
12701.2	NONO	8.4387	LPAR2	-6604	RASSF8	8.32501e-05	ZNF385B	1327	TTK	0.333333	RHOT1	0.0191766	RHOT1
12699.9	ATP2B1	8.43412	RDH13	-6604	LPAR2	8.32501e-05	CHL1	1326	ANK2	0.333333	HLA-DRA	0.0191712	HLA-DRA
12693.7	SMYD3	8.43194	ERVFRD-1	-6604	RDH13	8.32432e-05	ME3	1326	TG	0.333333	MCM2	0.0191569	MCM2
12692.9	SOS1	8.43067	IL11	-6604	ERVFRD-1	8.32432e-05	NLK	1326	PCSK1	0.333333	EIF4E	0.0191532	EIF4E
12689.9	COMMD10	8.42836	CDKN2D	-6604	IL11	8.32432e-05	ALOX5	1326	NFIL3	0.333333	SCD	0.0191451	SCD
12682.1	OIP5	8.42539	FGFRL1	-6604	CDKN2D	8.32432e-05	FLT1	1326	TNFAIP3	0.333333	RFTN1	0.0191374	RFTN1
12674.6	RFTN1	8.42528	PAPD5	-6604	FGFRL1	8.32432e-05	ALCAM	1325	PSMC6	0.333333	HNRNPA2B1	0.0191352	HNRNPA2B1
12672.3	GFPT2	8.42199	NPIPA1	-6604	PAPD5	8.32293e-05	LMBRD1	1324	WASF2	0.333333	DNAJA1	0.0191171	DNAJA1
12652.8	SLC2A2	8.42015	SPHK1	-6604	NPIPA1	8.32293e-05	KIFAP3	1324	MAP2K4	0.333333	SPRY2	0.0191164	SPRY2
12648.3	TP53I11	8.41885	NPM3	-6604	SPHK1	8.32293e-05	CAPRIN1	1323	VPS13C	0.333333	PCDH7	0.0191138	PCDH7
12643.8	PTK2B	8.41703	MLANA	-6604	NPM3	8.32293e-05	NR3C1	1322	TRIM2	0.333333	RBPJ	0.0191055	RBPJ
12643.5	HSPH1	8.41644	SLC9A8	-6604	MLANA	8.32224e-05	HSPH1	1322	MYO1B	0.333333	EFNA5	0.0191046	EFNA5
12642.9	SEC61G	8.41498	SLC22A18	-6604	SLC9A8	8.32224e-05	KIF5B	1321	DNAJA1	0.333333	ENPP2	0.0190958	ENPP2
12640.3	GRIN2B	8.41182	KCNK6	-6604	SLC22A18	8.32224e-05	CBL	1321	SLC8A1	0.333333	PDGFD	0.0190907	PDGFD
12637.6	PRKCZ	8.41058	SAT2	-6604	KCNK6	8.32154e-05	SCD	1321	PRKAR2B	0.333333	OIP5	0.0190848	OIP5
12620	HNRNPF	8.40893	SCML1	-6604	SAT2	8.32154e-05	SMC3	1321	RBBP8	0.333333	CCND2	0.0190649	CCND2
12619.5	DHRS2	8.40504	B3GNT5	-6604	SCML1	8.32085e-05	DRD5	1321	DPYSL2	0.333333	PRKAR2B	0.0190603	PRKAR2B
12614.4	CD55	8.40205	XRCC3	-6604	B3GNT5	8.32085e-05	TERF2IP	1321	CPB2	0.333333	MERTK	0.0190582	MERTK
12611.7	CALD1	8.39857	SIL1	-6604	XRCC3	8.32085e-05	HIF1A	1320	SELENBP1	0.333333	ITGB1	0.0190546	ITGB1
12609.9	DHRS3	8.39801	IFT20	-6604	SIL1	8.32016e-05	PCSK1	1320	STAG1	0.333333	HSPH1	0.0190539	HSPH1
12609.1	CBL	8.39726	ZNF19	-6604	IFT20	8.32016e-05	MYO1B	1320	SCD	0.333333	F13A1	0.0190512	F13A1
12609	TLR4	8.39517	ORAI2	-6604	ZNF19	8.31947e-05	SLC12A2	1319	CCND2	0.333333	IL15	0.019049	IL15
12608.3	ADAM9	8.39277	ABHD15	-6604	ORAI2	8.31947e-05	CKS2	1318	CNTN2	0.333333	MGP	0.0190437	MGP
12608.1	SPINT2	8.39266	TRANK1	-6604	ABHD15	8.31878e-05	SOX4	1318	GRIA2	0.333333	WWC1	0.0190396	WWC1
12606.1	CD8A	8.39182	PLXNA3	-6604	TRANK1	8.31878e-05	FLRT2	1317	PHGDH	0.333333	CCT7	0.0190286	CCT7
12605.5	NEDD9	8.38983	IFNA13	-6604	PLXNA3	8.31878e-05	ENPP2	1317	NLK	0.333333	TMEM200A	0.0190281	TMEM200A
12600.9	TUSC3	8.38965	SEPN1	-6604	IFNA13	8.31878e-05	NUP153	1317	HSPH1	0.333333	CCDC3	0.0190259	CCDC3
12595.4	IQGAP1	8.38884	ADRA2B	-6604	SEPN1	8.3167e-05	SOX2	1317	VLDLR	0.333333	KCNAB1	0.0190126	KCNAB1
12592.1	VLDLR	8.3861	IL36G	-6604	ADRA2B	8.3167e-05	ANKRD12	1316	SMAD2	0.333333	TGFBR1	0.0190073	TGFBR1
12591.6	NEFH	8.38543	OXSM	-6604	IL36G	8.3167e-05	TPD52L1	1315	RNF4	0.333333	CDC20	0.0190048	CDC20
12588.2	USP1	8.38231	GPT	-6604	OXSM	8.3167e-05	IGF1R	1315	ALOX5AP	0.333333	VAT1L	0.0190024	VAT1L
12585.9	MORC4	8.37966	ACKR4	-6604	GPT	8.31601e-05	PCBP3	1314	IL15	0.333333	HTT	0.0189997	HTT
12582	YWHAZ	8.37862	LSR	-6604	ACKR4	8.31601e-05	CTNNBIP1	1313	CAPRIN1	0.333333	GREM1	0.0189937	GREM1
12570.4	A1CF	8.37746	ENDOG	-6604	LSR	8.31601e-05	RELN	1313	TERF2IP	0.333333	CYP51A1	0.0189798	CYP51A1
12569.8	MYD88	8.37667	PAIP2B	-6604	ENDOG	8.31601e-05	DHRS3	1313	RELA	0.333333	PLSCR1	0.018977	PLSCR1
12567.8	IL7	8.37635	RTN2	-6604	PAIP2B	8.31601e-05	WDR26	1313	AKT1	0.333333	PARP1	0.0189685	PARP1
12551.8	TSPAN7	8.37625	CPT1B	-6604	RTN2	8.31601e-05	ITGB1	1312	KIF5B	0.333333	GJA1	0.0189551	GJA1
12544.5	DPYSL2	8.37532	SLC18B1	-6604	CPT1B	8.31532e-05	TNFRSF21	1311	GPD1L	0.333333	STIM1	0.018955	STIM1
12532.4	MARCKSL1	8.37402	CCDC94	-6604	SLC18B1	8.31463e-05	TLR4	1311	EGLN3	0.333333	IKBKE	0.0189548	IKBKE
12530.9	PPARGC1A	8.37212	ZFYVE1	-6604	CCDC94	8.31393e-05	HIPK1	1311	SEC31A	0.333333	MBP	0.0189473	MBP
12530.5	HIF1A	8.37092	RAD9A	-6604	ZFYVE1	8.31393e-05	CBFB	1311	BLVRB	0.333333	CTGF	0.0189466	CTGF
12523.8	MYO9A	8.36923	H3F3A	-6604	RAD9A	8.31324e-05	PLSCR1	1310	USP47	0.333333	PPFIBP1	0.0189352	PPFIBP1
12521.9	UGT2B7	8.36916	PTGES	-6604	H3F3A	8.31324e-05	OTUD4	1310	ENPP2	0.333333	LYN	0.0189347	LYN
12519.4	IVNS1ABP	8.3689	DDX11	-6604	PTGES	8.31324e-05	VLDLR	1309	SLC4A4	0.333333	CLIP1	0.0189343	CLIP1
12502.3	SRC	8.36631	PCSK9	-6604	DDX11	8.31255e-05	DCBLD2	1309	PTBP2	0.333333	CTNNBIP1	0.018922	CTNNBIP1
12478.4	IARS	8.36468	SLC5A2	-6604	PCSK9	8.31255e-05	CLIP1	1309	CLIP1	0.333333	CTH	0.01892	CTH
12468.1	SEC31A	8.36331	DEDD	-6604	SLC5A2	8.31186e-05	MGLL	1309	TGFB2	0.333333	IRS1	0.0189137	IRS1
12451	DCN	8.36193	ISYNA1	-6604	DEDD	8.31186e-05	NFIL3	1309	CD36	0.333333	SMC3	0.0189135	SMC3
12444.8	RBBP4	8.36051	GPAA1	-6604	ISYNA1	8.31186e-05	IARS	1308	CMSS1	0.333333	GRIA2	0.0189078	GRIA2
12440.2	EIF4E	8.35871	ZFHX4	-6604	GPAA1	8.31117e-05	RBBP8	1308	PDE4DIP	0.333333	TBC1D4	0.0188852	TBC1D4
12438.9	ATP1A2	8.35672	PPL	-6604	ZFHX4	8.31117e-05	PCDH9	1308	ABCB1	0.333333	PICALM	0.018879	PICALM
12438.4	SPTBN1	8.35539	BEND3	-6604	PPL	8.31117e-05	ALOX5AP	1308	GAPDH	0.333333	TGFB2	0.0188774	TGFB2
12434.4	PKN2	8.35426	FOXO4	-6604	BEND3	8.31048e-05	CCDC3	1308	PTPRC	0.333333	TERF2IP	0.0188715	TERF2IP
12434.1	ENO2	8.35403	FTO	-6604	FOXO4	8.31048e-05	JAZF1	1308	YWHAE	0.333333	ATM	0.0188623	ATM
12421.2	ATP6AP2	8.35287	CNPY1	-6604	FTO	8.30979e-05	BLVRB	1307	STIM1	0.333333	TLE4	0.0188599	TLE4
12412.4	DLGAP1	8.35046	AMHR2	-6604	CNPY1	8.30979e-05	MYOM2	1307	LHFP	0.333333	RELN	0.0188368	RELN
12404.4	NNMT	8.34937	MOK	-6604	AMHR2	8.30979e-05	LOX	1307	CCNB1	0.333333	PCDH17	0.0188344	PCDH17
12375.2	ABCC2	8.34913	PPM1M	-6604	MOK	8.30979e-05	PTGS2	1306	MORC4	0.333333	SGCD	0.0188213	SGCD
12374.4	ZCCHC7	8.34568	CEP170B	-6604	PPM1M	8.30979e-05	PAICS	1306	ANKRD12	0.333333	HIF1A	0.0188169	HIF1A
12365.3	SCD	8.34514	TTLL1	-6604	CEP170B	8.3091e-05	NOL8	1304	MRPL3	0.333333	TG	0.0188168	TG
12361.6	MRPL3	8.34428	GDF5	-6604	TTLL1	8.3091e-05	SGCD	1304	AMPH	0.333333	STK39	0.0188156	STK39
12354.9	PCK1	8.3431	SEMA7A	-6604	GDF5	8.3091e-05	BMP7	1303	GREM1	0.333333	CALCRL	0.0188136	CALCRL
12354	LRIG1	8.34236	GFPT2	-6604	SEMA7A	8.3091e-05	CRIM1	1303	DLGAP1	0.333333	DCTD	0.018811	DCTD
12342.6	CALCB	8.34231	HOOK2	-6604	GFPT2	8.3091e-05	SCARB1	1303	MRC2	0.333333	ATP1A2	0.0188106	ATP1A2
12330.2	SALL1	8.34194	SMO	-6604	HOOK2	8.3091e-05	GRIA2	1303	PDZD2	0.333333	GCA	0.0188071	GCA
12329.6	KIFAP3	8.33981	RNF112	-6604	SMO	8.30841e-05	NCOA3	1303	NCOA2	0.333333	EXOC5	0.0187994	EXOC5
12328.7	TTK	8.3392	SULT1A2	-6604	RNF112	8.30772e-05	TGFB2	1301	ARHGAP24	0.333333	TNFRSF1A	0.0187859	TNFRSF1A
12322.9	PLSCR1	8.3386	SPA17	-6604	SULT1A2	8.30772e-05	HNRNPF	1301	RFTN1	0.333333	IFNGR1	0.0187739	IFNGR1
12316	SLC6A12	8.33544	EPO	-6604	SPA17	8.30703e-05	PLD2	1299	RAD51B	0.333333	NNMT	0.0187707	NNMT
12305.8	KLF9	8.33533	ELP5	-6604	EPO	8.30703e-05	ATP1A2	1298	PROC	0.333333	MOXD1	0.0187706	MOXD1
12305.6	SLC4A4	8.33274	ZNF660	-6604	ELP5	8.30703e-05	STK39	1298	CLTC	0.333333	ALOX5AP	0.0187673	ALOX5AP
12297.6	GOLGA2	8.33115	FLT3LG	-6604	ZNF660	8.30703e-05	RBPJ	1298	RB1	0.333333	PCNA	0.0187559	PCNA
12292.5	NFIL3	8.32874	KMT2B	-6604	FLT3LG	8.30703e-05	SDCBP	1297	KPNB1	0.333333	SOX2	0.0187522	SOX2
12288.5	MST1R	8.3287	FITM2	-6604	KMT2B	8.30703e-05	CCND2	1296	RELN	0.333333	SDCBP	0.0187474	SDCBP
12275.3	FAM3C	8.32791	SLC30A2	-6604	FITM2	8.30634e-05	WWC1	1296	PLSCR1	0.333333	DPYSL2	0.0187398	DPYSL2
12274.8	CDC6	8.32568	PPP1R12C	-6604	SLC30A2	8.30634e-05	TPK1	1296	GNAO1	0.333333	PPFIBP2	0.0187382	PPFIBP2
12273	SMC3	8.32457	TREH	-6604	PPP1R12C	8.30634e-05	MBP	1296	NRAS	0.333333	IL16	0.0187347	IL16
12272.9	SSPN	8.32259	RNF167	-6604	TREH	8.30634e-05	DPYSL2	1295	OIP5	0.333333	VLDLR	0.0187318	VLDLR
12266.4	PTGS2	8.32231	LFNG	-6604	RNF167	8.30634e-05	IFNGR1	1295	SDCBP	0.333333	SLC12A2	0.0187318	SLC12A2
12228.1	HMGB2	8.3214	NT5DC2	-6604	LFNG	8.30634e-05	TNFAIP3	1295	IFNGR1	0.333333	C1orf21	0.0187191	C1orf21
12226.6	QKI	8.32008	OPN3	-6604	NT5DC2	8.30565e-05	SPRY2	1294	CYP27A1	0.333333	PCSK1	0.0187092	PCSK1
12226.1	ZNF385B	8.31868	ACTL8	-6604	OPN3	8.30565e-05	MAN2A1	1294	HIPK1	0.333333	TIPARP	0.0186914	TIPARP
12219.6	SPTAN1	8.3163	SLC41A3	-6604	ACTL8	8.30496e-05	PTK2B	1294	RBPJ	0.333333	SELENBP1	0.0186897	SELENBP1
12214.4	AMPH	8.31353	NOL6	-6604	SLC41A3	8.30496e-05	ATM	1294	SPRY2	0.333333	VCP	0.0186825	VCP
12194.5	ITGB1	8.31312	SEMA4A	-6604	NOL6	8.30358e-05	NNMT	1294	C1S	0.333333	TNFAIP3	0.0186604	TNFAIP3
12186.3	ARHGAP24	8.31294	PGPEP1	-6604	SEMA4A	8.30358e-05	MRPL3	1294	SRSF5	0.333333	DYSF	0.0186522	DYSF
12186.2	ABCB1	8.3127	SEPHS2	-6604	PGPEP1	8.3022e-05	TRPM3	1293	PAK1	0.333333	NFIL3	0.0186518	NFIL3
12181.3	ROR1	8.31166	CRLF1	-6604	SEPHS2	8.3022e-05	YWHAH	1292	ACLY	0.333333	HNRNPAB	0.0186444	HNRNPAB
12175.4	RPS6KA1	8.30745	G6PC3	-6604	CRLF1	8.30151e-05	PPFIBP2	1292	CD9	0.333333	ACSL4	0.0186436	ACSL4
12174.3	NLK	8.30458	FAM210B	-6604	G6PC3	8.30151e-05	PLK1	1292	RASA1	0.333333	FANCC	0.0186395	FANCC
12161.9	MMD	8.30363	SLC2A13	-6604	FAM210B	8.30082e-05	TBC1D4	1291	LOX	0.333333	MYOM2	0.0186381	MYOM2
12159.5	CHD1	8.30328	PKD2L1	-6604	SLC2A13	8.30082e-05	KCNAB1	1290	PAICS	0.333333	ANKFY1	0.018634	ANKFY1
12155.4	MAPK3	8.30234	MAP1A	-6604	PKD2L1	8.30082e-05	SRSF11	1290	CALCRL	0.333333	KALRN	0.0186258	KALRN
12153.7	CCDC3	8.29873	GNMT	-6604	MAP1A	8.30013e-05	EXOC5	1290	RGS7	0.333333	STARD13	0.0186146	STARD13
12150.4	DCBLD2	8.29849	OPRL1	-6604	GNMT	8.29944e-05	IGF2BP2	1289	PIK3CA	0.333333	GLIPR1	0.018609	GLIPR1
12139.1	GNAO1	8.29739	GAL	-6604	OPRL1	8.29944e-05	CCNC	1288	TP53I11	0.333333	MCM4	0.018606	MCM4
12115.9	XDH	8.2973	TNFRSF8	-6604	GAL	8.29944e-05	MCM6	1288	BMP7	0.333333	EHBP1	0.0186036	EHBP1
12107.4	CEBPD	8.29552	GCK	-6604	TNFRSF8	8.29876e-05	ZDHHC14	1287	SGCD	0.333333	PDLIM5	0.0185913	PDLIM5
12106	TYRO3	8.29522	KLRC3	-6604	GCK	8.29876e-05	NEK7	1287	SCARB1	0.333333	DACT1	0.0185895	DACT1
12102.5	RELA	8.29465	CDR1	-6604	KLRC3	8.29876e-05	CPB2	1287	USP1	0.333333	SCARB1	0.0185855	SCARB1
12097	SH3BP4	8.29379	ZIC2	-6604	CDR1	8.29807e-05	CD38	1287	CSNK2A2	0.333333	LOX	0.0185791	LOX
12095.7	NGF	8.29304	AEN	-6604	ZIC2	8.29807e-05	MTHFD1L	1286	ME3	0.333333	NDN	0.0185719	NDN
12094.4	XRCC5	8.29292	PIFO	-6604	AEN	8.29669e-05	SH2B3	1286	TPD52L1	0.333333	CD9	0.0185693	CD9
12070.8	SSR1	8.29195	BEX1	-6604	PIFO	8.29669e-05	IL16	1286	MYOM2	0.333333	MRC2	0.018567	MRC2
12053.6	CHST2	8.29195	PYGO2	-6604	BEX1	8.29669e-05	ABCB1	1286	MBP	0.333333	BMP7	0.0185566	BMP7
12042.3	CENPU	8.29056	SOX18	-6604	PYGO2	8.29669e-05	TLE4	1285	CXADR	0.333333	DPT	0.0185466	DPT
12040.4	MYLK	8.28999	TTYH3	-6604	SOX18	8.29669e-05	IRS1	1285	CD8A	0.333333	APLP2	0.0185417	APLP2
12040	ME3	8.28878	PITPNC1	-6604	TTYH3	8.29531e-05	GNAO1	1285	LAPTM5	0.333333	ADAM23	0.0185371	ADAM23
12035.9	GRB14	8.28743	IL13	-6604	PITPNC1	8.29531e-05	HACD2	1284	PCDH9	0.333333	ARHGAP18	0.0185266	ARHGAP18
12017.6	DOK2	8.28682	GLIS2	-6604	IL13	8.29531e-05	CD36	1284	MAN2A1	0.333333	PTGS2	0.0185256	PTGS2
12010.5	NRIP1	8.28552	VPS36	-6604	GLIS2	8.29463e-05	ZCCHC7	1284	CCNC	0.333333	CTBP2	0.018523	CTBP2
12007.2	ADRA2A	8.2854	NTHL1	-6604	VPS36	8.29463e-05	ACSL4	1284	DPT	0.333333	ZEB1	0.018507	ZEB1
12006	CCNC	8.28237	PAFAH1B3	-6604	NTHL1	8.29463e-05	RHOT1	1283	CAMK2A	0.333333	CBFB	0.0185047	CBFB
11997.1	AMFR	8.28206	RNF26	-6604	PAFAH1B3	8.29463e-05	GJA1	1283	RRM1	0.333333	CPVL	0.0185042	CPVL
11990	JAZF1	8.27954	NMB	-6604	RNF26	8.29394e-05	RASSF4	1282	SLC12A2	0.333333	SRSF11	0.0185016	SRSF11
11983.7	GPR135	8.27853	RAB20	-6604	NMB	8.29394e-05	DCTD	1282	SOX2	0.333333	MARCKS	0.0184942	MARCKS
11976.8	NRIP3	8.2766	CLCF1	-6604	RAB20	8.29394e-05	C1S	1282	DHRS3	0.333333	FAM3C	0.0184942	FAM3C
11971.9	TLK2	8.27342	EDA	-6604	CLCF1	8.29394e-05	PSMC6	1282	TNFRSF21	0.333333	CDK14	0.0184884	CDK14
11970.1	FOXF2	8.27339	CEACAM3	-6604	EDA	8.29325e-05	TTK	1282	NCOA1	0.333333	SH2B3	0.0184715	SH2B3
11958.3	CXADR	8.27209	ARHGAP28	-6604	CEACAM3	8.29256e-05	FGA	1281	SMYD3	0.333333	GSK3A	0.0184629	GSK3A
11955.8	PAK2	8.27001	GDF3	-6604	ARHGAP28	8.29256e-05	TMEM200A	1281	MSH2	0.333333	NUP98	0.0184566	NUP98
11952.9	LOX	8.26843	NPHS2	-6604	GDF3	8.29256e-05	AMPH	1280	EXOC4	0.333333	PAICS	0.0184515	PAICS
11939.5	NME1	8.26716	THYN1	-6604	NPHS2	8.29256e-05	CYP51A1	1280	LMBRD1	0.333333	CD36	0.0184415	CD36
11938.8	HDAC11	8.26244	PSG5	-6604	THYN1	8.29256e-05	PTPRG	1279	CDK7	0.333333	AHCY	0.0184342	AHCY
11925.9	RAB7A	8.26223	NGB	-6604	PSG5	8.29256e-05	PCDH7	1278	FEN1	0.333333	NUP153	0.0184312	NUP153
11915.8	MAP2K4	8.26105	ERCC2	-6604	NGB	8.29187e-05	CD8A	1277	ITGAV	0.333333	DHRS3	0.0184288	DHRS3
11901.2	CTPS1	8.25795	ZBTB46	-6604	ERCC2	8.29119e-05	BCAR3	1276	FLRT2	0.333333	GNAO1	0.0184127	GNAO1
11898.9	LMBRD1	8.25749	FAM83H	-6604	ZBTB46	8.29119e-05	ANKFY1	1276	NOL8	0.333333	CTSH	0.0184089	CTSH
11895.2	ENPP2	8.25717	ADAMTSL4	-6604	FAM83H	8.29119e-05	GAPDH	1276	PCDH7	0.333333	DHRS2	0.018381	DHRS2
11894.7	NREP	8.25555	INPPL1	-6604	ADAMTSL4	8.29119e-05	SSBP2	1276	ISLR	0.333333	SYBU	0.0183719	SYBU
11889	SSBP2	8.2549	GPR182	-6604	INPPL1	8.29119e-05	USP1	1275	TSHZ2	0.333333	G2E3	0.0183718	G2E3
11886.7	NR3C1	8.25382	TSPYL2	-6604	GPR182	8.29119e-05	HCK	1275	TMEM135	0.333333	RGS7	0.0183573	RGS7
11877.3	EGLN3	8.25372	HYLS1	-6604	TSPYL2	8.29119e-05	CTGF	1275	PPFIBP2	0.333333	SSBP2	0.0183518	SSBP2
11867.2	GRIA2	8.25323	AVP	-6604	HYLS1	8.2905e-05	VAT1L	1274	TLR4	0.333333	PIK3CD	0.0183509	PIK3CD
11855.1	COL17A1	8.25239	PLEKHF1	-6604	AVP	8.2905e-05	ADAM23	1272	STK39	0.333333	RASSF4	0.0183502	RASSF4
11853	FLT1	8.24947	THNSL1	-6604	PLEKHF1	8.2905e-05	MLLT10	1272	PRMT1	0.333333	NUAK1	0.0183451	NUAK1
11852.6	DDB2	8.24593	VPS51	-6604	THNSL1	8.2905e-05	ACLY	1271	APOB	0.333333	BCAR3	0.0183417	BCAR3
11837.8	DYNLT3	8.2455	CYGB	-6604	VPS51	8.28981e-05	CPVL	1270	GJA1	0.333333	NCOA3	0.01834	NCOA3
11825.4	GPR35	8.24365	AMN1	-6604	CYGB	8.28981e-05	SH3D19	1270	MTTP	0.333333	TNC	0.0183366	TNC
11825.3	STK39	8.24221	CLEC11A	-6604	AMN1	8.28981e-05	NRAS	1270	ATF2	0.333333	MLLT10	0.0183365	MLLT10
11814.9	IGF1R	8.23516	KAZALD1	-6604	CLEC11A	8.28912e-05	DHRS2	1270	CSE1L	0.333333	RBBP8	0.0183308	RBBP8
11797.2	SC5D	8.23494	PLEKHM2	-6604	KAZALD1	8.28912e-05	TPO	1269	MGLL	0.333333	ATF2	0.0183195	ATF2
11795.2	ZMIZ1	8.23471	CD40LG	-6604	PLEKHM2	8.28912e-05	PIK3CD	1269	FOXO1	0.333333	PSMD14	0.0183187	PSMD14
11794.3	SMURF2	8.2344	TNFRSF18	-6604	CD40LG	8.28912e-05	DPT	1268	ATP1A2	0.333333	PTK2B	0.0183121	PTK2B
11790.7	PRMT1	8.23431	SLC9A3R1	-6604	TNFRSF18	8.28912e-05	MERTK	1268	CDK14	0.333333	CDC7	0.0183056	CDC7
11782.7	PTTG1	8.23398	GOLGA8B	-6604	SLC9A3R1	8.28912e-05	LAPTM5	1267	IQCK	0.333333	LPGAT1	0.0183024	LPGAT1
11770.9	CLIC4	8.23341	S1PR2	-6604	GOLGA8B	8.28912e-05	CALCRL	1267	CTNNBIP1	0.333333	RAB7A	0.018287	RAB7A
11763.5	FUT8	8.23207	PGAM2	-6604	S1PR2	8.28844e-05	ISLR	1267	CASP3	0.333333	COMMD10	0.0182855	COMMD10
11752.4	RBPJ	8.23034	CHPF	-6604	PGAM2	8.28844e-05	TIPARP	1266	CTSC	0.333333	STMN2	0.0182752	STMN2
11743.9	NUP153	8.22858	MAP3K13	-6604	CHPF	8.28844e-05	ARHGAP20	1266	PPARGC1A	0.333333	C1S	0.0182717	C1S
11742.4	ERG	8.22589	SMIM14	-6604	MAP3K13	8.28844e-05	CD9	1265	DCBLD2	0.333333	RAPGEF5	0.0182663	RAPGEF5
11742.3	CLIP1	8.22355	TRIM11	-6604	SMIM14	8.28844e-05	PPFIBP1	1265	EXOC5	0.333333	DRD5	0.0182559	DRD5
11736.8	STAG1	8.22289	HOXA2	-6604	TRIM11	8.28775e-05	PROC	1265	SSBP2	0.333333	POSTN	0.018253	POSTN
11734.2	MBP	8.22105	POMGNT1	-6604	HOXA2	8.28775e-05	FAM3C	1265	RAB7A	0.333333	NRAS	0.0182456	NRAS
11732.8	PSMC6	8.21914	IL17A	-6604	POMGNT1	8.28775e-05	EFNA5	1265	LCP2	0.333333	IL1RAP	0.0182298	IL1RAP
11713.2	UAP1	8.21723	ART1	-6604	IL17A	8.28706e-05	DSC3	1264	MERTK	0.333333	PTGS1	0.0182225	PTGS1
11711.5	SCARB1	8.21371	CA9	-6604	ART1	8.28706e-05	MAP2K4	1263	OTUD4	0.333333	CTSC	0.0182212	CTSC
11710.7	STEAP1	8.21295	PLA2G15	-6604	CA9	8.28638e-05	CCNG1	1263	PIK3CD	0.333333	THRB	0.0182192	THRB
11707.6	MEF2C	8.2105	STMN3	-6604	PLA2G15	8.28638e-05	MARCKS	1263	IL1RAP	0.333333	PELI2	0.0182117	PELI2
11700.7	CD9	8.20848	IMMP1L	-6604	STMN3	8.28638e-05	RAB7A	1263	SP3	0.333333	YWHAH	0.0182087	YWHAH
11698.5	ITGAM	8.20828	TFEB	-6604	IMMP1L	8.28638e-05	CTSC	1262	BRCA1	0.333333	LPP	0.0181688	LPP
11696.5	RASSF4	8.20771	NLGN3	-6604	TFEB	8.28569e-05	ASIC2	1261	PTPRG	0.333333	MYO9A	0.0181628	MYO9A
11691.6	CHEK2	8.20728	GSC	-6604	NLGN3	8.28569e-05	PCDH17	1260	MLLT10	0.333333	CCNC	0.0181577	CCNC
11691.1	BNIP3	8.20604	HAMP	-6604	GSC	8.285e-05	NDN	1259	MAPK9	0.333333	PHGDH	0.0181571	PHGDH
11680.3	MCM3	8.20534	NFS1	-6604	HAMP	8.285e-05	HADH	1258	SOX4	0.333333	MAFB	0.0181469	MAFB
11667.4	RASA1	8.20519	NICN1	-6604	NFS1	8.285e-05	RBBP4	1258	CRIM1	0.333333	ABCB1	0.0181361	ABCB1
11663.5	DRAP1	8.20485	TRPM4	-6604	NICN1	8.28432e-05	FCGRT	1258	TBC1D4	0.333333	PTN	0.0181234	PTN
11662.5	PPFIBP2	8.20277	HOXC10	-6604	TRPM4	8.28432e-05	MOXD1	1258	TLE4	0.333333	NFATC2	0.0181197	NFATC2
11652.3	TNFSF10	8.20092	TNFAIP8L3	-6604	HOXC10	8.28363e-05	FOSL1	1258	PICALM	0.333333	MSI2	0.0181187	MSI2
11646.1	NDRG1	8.19998	ZNF70	-6604	TNFAIP8L3	8.28363e-05	COMMD10	1257	DRD5	0.333333	PRMT2	0.018099	PRMT2
11645	CALB2	8.19997	ULBP2	-6604	ZNF70	8.28363e-05	PTGS1	1257	PLD2	0.333333	ACLY	0.0180985	ACLY
11635.1	COL18A1	8.19735	L3MBTL1	-6604	ULBP2	8.28295e-05	SEC61G	1257	HADH	0.333333	ZFC3H1	0.0180972	ZFC3H1
11624	YWHAE	8.19706	NEU3	-6604	L3MBTL1	8.28295e-05	SPARCL1	1257	ACVRL1	0.333333	ZMIZ1	0.0180967	ZMIZ1
11623.3	TRIM2	8.19698	DCAF4	-6604	NEU3	8.28295e-05	FEN1	1257	TFDP1	0.333333	TSHZ3	0.018095	TSHZ3
11620.4	DHX15	8.19685	CYB5R2	-6604	DCAF4	8.28226e-05	HMGB2	1257	ITGAM	0.333333	ZRANB2	0.0180911	ZRANB2
11615	PSMA1	8.18963	CENPW	-6604	CYB5R2	8.28157e-05	PPARGC1A	1256	ZEB1	0.333333	AMPH	0.0180903	AMPH
11614.6	CNTFR	8.18855	NME7	-6604	CENPW	8.28157e-05	NUAK1	1255	PDLIM5	0.333333	SRSF5	0.0180862	SRSF5
11613.1	MLLT10	8.18778	ASNS	-6604	NME7	8.28157e-05	APLP2	1255	ANXA2	0.333333	NOL8	0.0180765	NOL8
11603.5	PSMB8	8.18665	MKS1	-6604	ASNS	8.28157e-05	RGS7	1255	KAT2B	0.333333	ST3GAL1	0.0180765	ST3GAL1
11603.3	RPL34	8.18637	NFYB	-6604	MKS1	8.28089e-05	PCK1	1254	NEK7	0.333333	PTPRC	0.0180747	PTPRC
11603.2	RAB3B	8.1803	DPP3	-6604	NFYB	8.2802e-05	CORO2B	1254	PPFIBP1	0.333333	LRRN1	0.0180571	LRRN1
11599.2	MYH10	8.18023	IL37	-6604	DPP3	8.2802e-05	APOB	1253	KCNAB1	0.333333	NCOA1	0.0180491	NCOA1
11571.9	UTP20	8.17888	DOLK	-6604	IL37	8.2802e-05	MAFB	1253	CD38	0.333333	SPARCL1	0.0180396	SPARCL1
11571.5	PIK3CD	8.17875	SEC16A	-6604	DOLK	8.2802e-05	C1orf21	1252	KIRREL3	0.333333	MAP2K4	0.0180376	MAP2K4
11566.7	PIK3CA	8.17659	EPS8L2	-6604	SEC16A	8.2802e-05	CDK14	1252	PCBP3	0.333333	ACVRL1	0.0180333	ACVRL1
11566.3	SRSF5	8.17582	RPP25	-6604	EPS8L2	8.27952e-05	CHST2	1252	NNMT	0.333333	FGA	0.0180263	FGA
11564.8	SP3	8.17579	ERN1	-6604	RPP25	8.27952e-05	HDAC2	1252	FGA	0.333333	NDFIP2	0.0180231	NDFIP2
11549.4	CSNK2A2	8.17465	HIRIP3	-6604	ERN1	8.27883e-05	ABCG2	1252	TNC	0.333333	RASGRP1	0.0180154	RASGRP1
11542.7	BCAR3	8.17338	SLC19A1	-6604	HIRIP3	8.27883e-05	FOXC1	1251	PRIM1	0.333333	DSC3	0.0180131	DSC3
11533.4	HCK	8.17334	SGTA	-6604	SLC19A1	8.27883e-05	LIPA	1250	TPO	0.333333	TXNIP	0.0180001	TXNIP
11530.6	FLNA	8.17286	KCNK13	-6604	SGTA	8.27883e-05	TRIB1	1250	RHOA	0.333333	LAPTM5	0.0179918	LAPTM5
11516.1	MARCKS	8.17208	DBF4B	-6604	KCNK13	8.27883e-05	IL1RAP	1249	CYP51A1	0.333333	ZMYND11	0.0179868	ZMYND11
11499.9	ATM	8.16851	HACL1	-6604	DBF4B	8.27746e-05	MYO9A	1249	SPARCL1	0.333333	FOXO1	0.0179805	FOXO1
11495.3	PPIF	8.16827	CBX7	-6604	HACL1	8.27746e-05	CALCB	1248	WWC1	0.333333	PPARGC1A	0.0179787	PPARGC1A
11492.5	CYP11A1	8.16706	TNNI3	-6604	CBX7	8.27746e-05	CKAP4	1248	CPVL	0.333333	ADGRB3	0.0179675	ADGRB3
11489.2	CD59	8.16685	WRAP53	-6604	TNNI3	8.27746e-05	KALRN	1248	MARCKS	0.333333	GOLGA4	0.0179645	GOLGA4
11482.3	ALOX5AP	8.16495	NBPF10	-6604	WRAP53	8.27746e-05	PDLIM5	1248	LPP	0.333333	MGLL	0.0179581	MGLL
11479.6	TRIB1	8.16328	CDKN2B	-6604	NBPF10	8.27746e-05	PICALM	1247	APLP2	0.333333	TRIB1	0.0179476	TRIB1
11479.3	BCHE	8.16197	BCL2L14	-6604	CDKN2B	8.27746e-05	GRB2	1246	ACSL4	0.333333	CALCB	0.0179419	CALCB
11467.5	ALOX5	8.15984	PLPPR2	-6604	BCL2L14	8.27678e-05	SRSF5	1246	NUAK1	0.333333	CNN3	0.0179401	CNN3
11464.8	CAV1	8.1568	DCXR	-6604	PLPPR2	8.27678e-05	PTPRC	1246	TRIB1	0.333333	CLTC	0.0179362	CLTC
11463.7	FEN1	8.15443	TPTE	-6604	DCXR	8.27609e-05	ASS1	1246	TRRAP	0.333333	CKAP4	0.0179255	CKAP4
11462.6	TSHZ2	8.15336	LETMD1	-6604	TPTE	8.27609e-05	DYSF	1246	CHEK2	0.333333	PTPRN2	0.0179214	PTPRN2
11460.9	PTGIS	8.15304	SNAI3	-6604	LETMD1	8.27609e-05	ILK	1245	HACD2	0.333333	MPRIP	0.0179106	MPRIP
11453.6	ANKFY1	8.15304	SPG7	-6604	SNAI3	8.27609e-05	STMN2	1245	NME1	0.333333	IARS	0.0179096	IARS
11453.4	TMSB10	8.153	PITX1	-6604	SPG7	8.27609e-05	ACVRL1	1245	SNAP25	0.333333	RASA1	0.0179089	RASA1
11442	CSNK1E	8.15297	SLC37A4	-6604	PITX1	8.27609e-05	GLIPR1	1244	WDR26	0.333333	CHST2	0.0179059	CHST2
11438.4	FOXO1	8.15173	PSD	-6604	SLC37A4	8.27541e-05	MTTP	1244	ASS1	0.333333	WDFY3	0.0178984	WDFY3
11436	BRCA1	8.15082	HOXA13	-6604	PSD	8.27541e-05	ANXA2	1244	A1CF	0.333333	CD8A	0.0178896	CD8A
11434.4	SERPINH1	8.15066	TNFRSF13B	-6604	HOXA13	8.27472e-05	STEAP1	1244	CD40	0.333333	HNRNPF	0.0178858	HNRNPF
11432.6	EXOC4	8.15056	RAB3A	-6604	TNFRSF13B	8.27472e-05	A1CF	1243	COL6A3	0.333333	CD58	0.0178829	CD58
11432.5	MSH2	8.14834	CCL22	-6604	RAB3A	8.27472e-05	CD58	1242	CCDC3	0.333333	BCOR	0.0178808	BCOR
11430.2	PTGS1	8.14612	HTR7	-6604	CCL22	8.27472e-05	STARD13	1242	JAZF1	0.333333	RHOJ	0.0178607	RHOJ
11427.6	IL1RAP	8.14582	TMC6	-6604	HTR7	8.27472e-05	DHX15	1242	DCTD	0.333333	CHD9	0.0178591	CHD9
11426.8	CHL1	8.13878	PLOD3	-6604	TMC6	8.27404e-05	BASP1	1242	NDN	0.333333	KRAS	0.0178553	KRAS
11424.8	KIF5B	8.13482	DNAJC5	-6604	PLOD3	8.27404e-05	MPRIP	1241	ZNF385B	0.333333	ABAT	0.0178433	ABAT
11417.3	HDAC2	8.13431	PDE12	-6604	DNAJC5	8.27404e-05	CTBP2	1241	ZDHHC14	0.333333	LIPA	0.0178428	LIPA
11413.8	RBM39	8.13222	TMBIM4	-6604	PDE12	8.27404e-05	THRB	1241	DSC3	0.333333	PECAM1	0.0178421	PECAM1
11401.8	EGF	8.13055	RAB42	-6604	TMBIM4	8.27404e-05	PIK3CA	1241	STMN2	0.333333	PRKCH	0.0178185	PRKCH
11399.7	EDAR	8.12921	S100A16	-6604	RAB42	8.27335e-05	ZEB1	1241	HUWE1	0.333333	ITGAV	0.0178177	ITGAV
11393.5	LZTR1	8.128	STRADA	-6604	S100A16	8.27335e-05	CLTC	1241	SPTAN1	0.333333	PDE7B	0.0178153	PDE7B
11387.2	PTBP2	8.12365	SLC18A2	-6604	STRADA	8.27267e-05	GOLGA4	1241	IFNG	0.333333	ACO1	0.0178141	ACO1
11387	HRAS	8.11965	PI15	-6604	SLC18A2	8.27267e-05	CTSH	1241	IL6ST	0.333333	NCOA2	0.0178128	NCOA2
11379.5	SPARCL1	8.11865	CTSV	-6604	PI15	8.27267e-05	NUP98	1240	ASIC2	0.333333	PID1	0.0178102	PID1
11377.1	F13A1	8.11777	GPR157	-6604	CTSV	8.27198e-05	ACTL8	1240	OAT	0.333333	TYRO3	0.0178085	TYRO3
11373	ITGA6	8.11605	DPYSL4	-6604	GPR157	8.27198e-05	COX5A	1240	MCL1	0.333333	MYCBP2	0.0178082	MYCBP2
11370.3	SPRY2	8.1122	VPS11	-6604	DPYSL4	8.27198e-05	ST3GAL1	1240	CHUK	0.333333	TOM1L1	0.0178082	TOM1L1
11370	IFNG	8.10991	USP53	-6604	VPS11	8.27198e-05	LPP	1239	TNFSF10	0.333333	FOXC1	0.0178069	FOXC1
11339.3	DCTN6	8.10979	TTC9	-6604	USP53	8.2713e-05	TYRO3	1238	IL16	0.333333	IWS1	0.017802	IWS1
11338.1	WWC1	8.10936	DHDDS	-6604	TTC9	8.2713e-05	ATF2	1238	PTGS1	0.333333	CLCN3	0.0177889	CLCN3
11338	COL6A3	8.10873	PXMP4	-6604	DHDDS	8.27061e-05	TRIP10	1238	INHBA	0.333333	PCBP3	0.0177873	PCBP3
11327.6	MCM6	8.10871	POR	-6604	PXMP4	8.27061e-05	SLC9A9	1237	SH2B3	0.333333	TMTC2	0.0177849	TMTC2
11325.9	TLN1	8.10681	UCP1	-6604	POR	8.26993e-05	LRIG1	1237	CENPF	0.333333	ZNF521	0.0177816	ZNF521
11325.2	REV3L	8.10378	CCDC69	-6604	UCP1	8.26993e-05	NCOA1	1234	LIPA	0.333333	CCDC50	0.0177771	CCDC50
11320.9	MAPK9	8.1034	LGALS2	-6604	CCDC69	8.26993e-05	YWHAE	1234	NEFH	0.333333	MICAL2	0.0177717	MICAL2
11318.2	TRRAP	8.10164	GPR183	-6604	LGALS2	8.26925e-05	CETN3	1234	COL5A1	0.333333	CLEC2B	0.0177588	CLEC2B
11313.5	PCDH9	8.09821	MAP3K10	-6604	GPR183	8.26925e-05	OAT	1233	IGF2BP2	0.333333	PSMC6	0.0177474	PSMC6
11309.6	ALCAM	8.09736	WNT6	-6604	MAP3K10	8.26856e-05	CHD1	1233	RHOT1	0.333333	LRIG1	0.01774	LRIG1
11307.9	CPVL	8.09729	LY6K	-6604	WNT6	8.26856e-05	COL17A1	1233	SEC61G	0.333333	TPO	0.017722	TPO
11294.6	SDCBP	8.09571	TUBB4A	-6604	LY6K	8.26856e-05	ZFC3H1	1233	CTPS1	0.333333	CEMIP	0.01772	CEMIP
11290.7	C1S	8.092	BCL2L2	-6604	TUBB4A	8.26856e-05	FOXO1	1233	PRKCH	0.333333	HES1	0.017707	HES1
11290.1	CBFB	8.0905	RABGGTA	-6604	BCL2L2	8.26788e-05	NEFH	1233	IL4R	0.333333	SMAD2	0.0177041	SMAD2
11279.7	IQCK	8.08971	SCO2	-6604	RABGGTA	8.26788e-05	CTPS1	1233	LAMB1	0.333333	CDON	0.017701	CDON
11269.8	LIPA	8.08916	CCL16	-6604	SCO2	8.26788e-05	PELI2	1232	FAM3C	0.333333	LRRFIP1	0.0176988	LRRFIP1
11269.3	DPP4	8.08738	GPS2	-6604	CCL16	8.26788e-05	MCM3	1232	PCDH17	0.333333	CD38	0.0176963	CD38
11261.9	NRAS	8.08731	CITED4	-6604	GPS2	8.26788e-05	TP53	1232	MLH1	0.333333	PIK3CA	0.0176838	PIK3CA
11256.5	PDZD2	8.08656	ELOVL3	-6604	CITED4	8.2672e-05	BNIP3	1232	CDH5	0.333333	TJP1	0.0176829	TJP1
11254.7	SH2B3	8.08319	TDGF1	-6604	ELOVL3	8.2672e-05	TXNIP	1231	PCK1	0.333333	SYNPO2	0.0176552	SYNPO2
11254	FLRT2	8.08116	GIPC1	-6604	TDGF1	8.2672e-05	ZRANB2	1231	STARD13	0.333333	HADH	0.0176514	HADH
11244.7	ADAM23	8.08086	TGIF2	-6604	GIPC1	8.2672e-05	PTN	1231	SERPINH1	0.333333	GABRB3	0.0176466	GABRB3
11240.8	CD93	8.0793	SLC25A20	-6604	TGIF2	8.2672e-05	PTPRN2	1231	JAK1	0.333333	GATA6	0.0176381	GATA6
11240.6	CD81	8.07926	SDHAF1	-6604	SLC25A20	8.2672e-05	ARHGAP18	1231	CREBBP	0.333333	BCHE	0.0176318	BCHE
11240.5	S100A11	8.07685	FAM110C	-6604	SDHAF1	8.2672e-05	ABAT	1230	ADAM23	0.333333	TFPI2	0.0176298	TFPI2
11240.2	OTUD4	8.07471	GPR68	-6604	FAM110C	8.2672e-05	RASA1	1230	DHRS2	0.333333	MAPK9	0.0176231	MAPK9
11234.9	TNFRSF14	8.07449	CIZ1	-6604	GPR68	8.2672e-05	NCOA2	1230	CCNG1	0.333333	COL5A1	0.0176176	COL5A1
11232.9	IRS1	8.0724	ECM1	-6604	CIZ1	8.26651e-05	RAB3B	1230	MOXD1	0.333333	PSAT1	0.0176169	PSAT1
11220	CLSTN1	8.07208	IL26	-6604	ECM1	8.26651e-05	MYCBP2	1230	CTBP2	0.333333	SEC61G	0.0176154	SEC61G
11214.4	RGS7	8.07164	PCYT1B	-6604	IL26	8.26651e-05	RASGRP1	1230	THRB	0.333333	CD40	0.0176145	CD40
11206.5	CUL1	8.07107	IL17RE	-6604	PCYT1B	8.26583e-05	CAPNS1	1230	CASP8	0.333333	IFNGR2	0.0176074	IFNGR2
11189	HIVEP1	8.07049	EDAR	-6604	IL17RE	8.26583e-05	UAP1	1229	COL17A1	0.333333	ANXA2	0.0175885	ANXA2
11174.2	CAPN1	8.06978	TREM2	-6604	EDAR	8.26583e-05	BCHE	1229	TXNIP	0.333333	KCNK1	0.0175829	KCNK1
11173.5	AIMP2	8.06792	PHF11	-6604	TREM2	8.26583e-05	REV3L	1228	BCAR3	0.333333	PLD2	0.0175714	PLD2
11170.6	MLF2	8.06758	RFX2	-6604	PHF11	8.26583e-05	TNC	1228	ABAT	0.333333	SEMA3C	0.01757	SEMA3C
11169.8	EEF1A2	8.0671	MUL1	-6604	RFX2	8.26515e-05	TSHZ3	1228	MYD88	0.333333	BASP1	0.017568	BASP1
11163.7	CDK2	8.06365	RPS6KB2	-6604	MUL1	8.26515e-05	TRRAP	1228	ITGA5	0.333333	REV3L	0.0175658	REV3L
11153.6	TBC1D4	8.06157	CDX1	-6604	RPS6KB2	8.26446e-05	EMP3	1228	TEK	0.333333	FBL	0.0175518	FBL
11153.5	HDGF	8.06077	COG4	-6604	CDX1	8.26446e-05	MARCKSL1	1227	GLIPR1	0.333333	EPAS1	0.0175409	EPAS1
11152.8	GSK3B	8.06036	ACE2	-6604	COG4	8.26446e-05	GABRB3	1226	ANKFY1	0.333333	RAB3B	0.0175403	RAB3B
11152.5	AKT1	8.05886	PDXP	-6604	ACE2	8.26446e-05	CHEK2	1225	FCGRT	0.333333	BCL9	0.0175383	BCL9
11142.6	DYNC1H1	8.05813	PCDH20	-6604	PDXP	8.26446e-05	SERPINH1	1225	FOSL1	0.333333	OGFRL1	0.0175361	OGFRL1
11141.9	BAAT	8.05422	ZNRF3	-6604	PCDH20	8.26446e-05	CLEC2B	1225	PTPRN2	0.333333	CDK4	0.0175322	CDK4
11130.8	TPD52L1	8.05369	CALB1	-6604	ZNRF3	8.26446e-05	CSNK2A2	1224	TYRO3	0.333333	FGF7	0.01752	FGF7
11128	GABRB3	8.05303	REG1A	-6604	CALB1	8.26446e-05	TFDP1	1223	SNRPA1	0.333333	CBX5	0.01752	CBX5
11127.3	CRIM1	8.05192	ZNF287	-6604	REG1A	8.26446e-05	EHBP1	1222	TPK1	0.333333	DCT	0.0175142	DCT
11093.4	UNC13B	8.0497	TFF1	-6604	ZNF287	8.26378e-05	ZMIZ1	1222	TSPAN7	0.333333	NEFH	0.0175125	NEFH
11092.7	ANXA2	8.04907	NODAL	-6604	TFF1	8.26378e-05	G2E3	1222	RHOJ	0.333333	LARP6	0.0175082	LARP6
11080.7	EXOC5	8.04859	DHX37	-6604	NODAL	8.26378e-05	NFATC2	1222	ACO1	0.333333	SPAG9	0.0175058	SPAG9
11075.3	PKD2	8.04826	TNS2	-6604	DHX37	8.2631e-05	OGDH	1222	IRF8	0.333333	SERPINH1	0.0175026	SERPINH1
11066.8	FPR1	8.04791	MIA	-6604	TNS2	8.2631e-05	CD40	1221	CKAP4	0.333333	NEBL	0.0174921	NEBL
11062.3	CAMK2A	8.0468	RECQL5	-6604	MIA	8.26241e-05	SPTA1	1220	MTHFD1L	0.333333	MCM6	0.0174911	MCM6
11060.8	SNAP91	8.04559	NLRP2	-6604	RECQL5	8.26241e-05	AMFR	1220	NUP98	0.333333	TUFT1	0.0174713	TUFT1
11056.1	IL2RG	8.04527	GABARAP	-6604	NLRP2	8.26241e-05	BCOR	1219	CD58	0.333333	PRICKLE1	0.0174685	PRICKLE1
11056	SOX4	8.04461	CRB2	-6604	GABARAP	8.26241e-05	SP3	1219	SLC2A2	0.333333	PDE3A	0.0174563	PDE3A
11048.9	SNRPA1	8.04399	FAM234B	-6604	CRB2	8.26241e-05	PECAM1	1219	RPA1	0.333333	TRRAP	0.0174553	TRRAP
11040.8	TUBB2A	8.04306	NLE1	-6604	FAM234B	8.26241e-05	ITGAV	1218	RASSF4	0.333333	GRIA4	0.0174499	GRIA4
11036.4	OGDH	8.04293	GPR135	-6604	NLE1	8.26241e-05	FLNA	1218	EPAS1	0.333333	VTI1A	0.0174462	VTI1A
11034.7	MYCBP2	8.03823	PIK3C2G	-6604	GPR135	8.26173e-05	TSPAN7	1218	CUL3	0.333333	RBBP4	0.0174338	RBBP4
11032.2	TNFAIP3	8.03738	STBD1	-6604	PIK3C2G	8.26173e-05	PRKCH	1217	ABCG2	0.333333	VPS13D	0.0174337	VPS13D
11030.4	BASP1	8.03645	CNTN3	-6604	STBD1	8.26173e-05	POSTN	1217	POSTN	0.333333	NRP1	0.0174318	NRP1
11030.3	NCOA1	8.03592	SLC7A10	-6604	CNTN3	8.26105e-05	SOX1	1217	HES1	0.333333	IDS	0.0174315	IDS
11029.8	TSHZ3	8.03582	CEP70	-6604	SLC7A10	8.26105e-05	SYBU	1217	SMAD4	0.333333	OGDH	0.0174298	OGDH
11025.1	PAICS	8.03444	SCAP	-6604	CEP70	8.26105e-05	TNFSF10	1216	MAFB	0.333333	CHN2	0.0174285	CHN2
11011.2	MLH1	8.03422	TET3	-6604	SCAP	8.26105e-05	RHOJ	1216	CDC27	0.333333	LNPEP	0.0174221	LNPEP
11010.3	TMEM135	8.03174	CABLES1	-6604	TET3	8.26105e-05	ACO1	1215	PRKCZ	0.333333	STEAP1	0.0174187	STEAP1
10998.5	FOXM1	8.03079	OSM	-6604	CABLES1	8.26105e-05	CDC6	1214	TIPARP	0.333333	TTK	0.0174145	TTK
10998.4	CD36	8.03055	HIP1R	-6604	OSM	8.26037e-05	MICAL2	1214	FOXC1	0.333333	HCK	0.0174045	HCK
10994	FMO4	8.02897	BMP3	-6604	HIP1R	8.26037e-05	PRMT2	1214	CLEC2B	0.333333	MRPL3	0.0174003	MRPL3
10990.8	KAT2B	8.02879	MYZAP	-6604	BMP3	8.26037e-05	IL4R	1214	FGF7	0.333333	PCK1	0.0173975	PCK1
10984.4	NCOA2	8.02776	B4GALT6	-6604	MYZAP	8.26037e-05	PRMT1	1213	C1orf21	0.333333	GRB2	0.0173971	GRB2
10972.3	CCND2	8.02134	BBS1	-6604	B4GALT6	8.25968e-05	SNRPA1	1213	CNN3	0.333333	TNS3	0.0173902	TNS3
10963.5	MGMT	8.0209	DOK4	-6604	BBS1	8.25968e-05	MAPK9	1213	CCT5	0.333333	ABCG2	0.0173892	ABCG2
10954.9	CUL5	8.01856	NAP1L5	-6604	DOK4	8.25968e-05	PAK1	1212	TRIP10	0.333333	TNPO1	0.0173866	TNPO1
10951.6	GJA1	8.01691	HOXB6	-6604	NAP1L5	8.259e-05	LRRN1	1211	CHST2	0.333333	PDCD6IP	0.0173847	PDCD6IP
10947.8	ZNF521	8.01589	RCN1	-6604	HOXB6	8.259e-05	GRB14	1211	AMFR	0.333333	GAPDH	0.0173809	GAPDH
10944.6	SDC1	8.01523	MPG	-6604	RCN1	8.259e-05	CDON	1210	KALRN	0.333333	CCNG1	0.0173774	CCNG1
10939.9	CDK7	8.01494	SMAGP	-6604	MPG	8.25832e-05	LPGAT1	1210	CUL1	0.333333	TFRC	0.0173725	TFRC
10937.2	LRRN1	8.01474	PSG2	-6604	SMAGP	8.25832e-05	HUWE1	1209	CALCB	0.333333	PKD2	0.0173706	PKD2
10936.9	IFNGR1	8.01054	RUNDC3B	-6604	PSG2	8.25764e-05	AIMP2	1209	POLA1	0.333333	PPP1R12A	0.017369	PPP1R12A
10928	MTHFD1L	8.01031	TICAM1	-6604	RUNDC3B	8.25764e-05	SPTAN1	1208	EFNA5	0.333333	BNIP3	0.0173642	BNIP3
10928	COL4A2	8.00999	LLGL2	-6604	TICAM1	8.25764e-05	PSAT1	1208	SPTA1	0.333333	LAMB1	0.0173627	LAMB1
10921.3	TXNIP	8.00987	ACHE	-6604	LLGL2	8.25696e-05	COL6A3	1207	COMMD10	0.333333	CKS2	0.0173584	CKS2
10918.4	HOXB13	8.00937	AQP2	-6604	ACHE	8.25627e-05	NDRG1	1207	PIAS1	0.333333	INHBA	0.0173582	INHBA
10903.9	WDR26	8.00715	NTSR1	-6604	AQP2	8.25627e-05	IFNGR2	1206	PELI2	0.333333	ISLR	0.0173574	ISLR
10900.6	IL16	8.00435	ADAM15	-6604	NTSR1	8.25627e-05	ADGRB3	1206	EHBP1	0.333333	SCHIP1	0.0173567	SCHIP1
10899.6	VSNL1	8.00255	FAM83C	-6604	ADAM15	8.25627e-05	DACT1	1206	RAPGEF5	0.333333	HDAC11	0.0173496	HDAC11
10885.5	RHOJ	8.00099	WDR11	-6604	FAM83C	8.25559e-05	HDAC11	1206	EEF1A2	0.333333	MCL1	0.0173405	MCL1
10857.7	KCNAB1	8.00027	RAI1	-6604	WDR11	8.25491e-05	RAPGEF5	1206	KRAS	0.333333	APOB	0.0173388	APOB
10856.9	NEK7	8.00008	SLC46A3	-6604	RAI1	8.25491e-05	LCP2	1206	TLN1	0.333333	PAK1	0.017334	PAK1
10830.9	PFKM	7.99919	NPPA	-6604	SLC46A3	8.25423e-05	FOXA1	1206	AR	0.333333	DCTN6	0.0173294	DCTN6
10827.8	CAPRIN1	7.99832	ACOX2	-6604	NPPA	8.25423e-05	DCTN6	1205	TMEM200A	0.333333	SLC1A3	0.0173254	SLC1A3
10827.1	CSTA	7.99565	EML2	-6604	ACOX2	8.25423e-05	EPAS1	1205	MPRIP	0.333333	PIAS1	0.0173253	PIAS1
10815.3	LHFP	7.99397	GLS2	-6604	EML2	8.25423e-05	ITGAM	1205	ST3GAL1	0.333333	USP1	0.0173232	USP1
10814.1	ACSF2	7.99247	ZBTB7A	-6604	GLS2	8.25423e-05	MSH2	1205	LRIG1	0.333333	LAMA1	0.0173221	LAMA1
10808.3	CALCOCO2	7.99214	SUV39H1	-6604	ZBTB7A	8.25355e-05	NGF	1205	KIF11	0.333333	TF	0.0173197	TF
10806.3	CLEC2B	7.99164	NOS3	-6604	SUV39H1	8.25355e-05	ZNF521	1204	COX5A	0.333333	CAMK2A	0.017314	CAMK2A
10796.9	CDON	7.9908	APEH	-6604	NOS3	8.25355e-05	NEBL	1203	MYCBP2	0.333333	A1CF	0.0173075	A1CF
10794.8	NUAK1	7.98826	GLI1	-6604	APEH	8.25355e-05	IFNG	1203	ADGRB3	0.333333	HUWE1	0.0173025	HUWE1
10789.1	MPRIP	7.98662	HARS2	-6604	GLI1	8.25355e-05	CDK7	1203	ABCC2	0.333333	BTC	0.0173017	BTC
10788.6	ACSL4	7.9839	APOA4	-6604	HARS2	8.25355e-05	SMAD2	1202	SH3D19	0.333333	HACD1	0.0172984	HACD1
10786.7	MAFB	7.9838	FBXO16	-6604	APOA4	8.25287e-05	PKD2	1202	MYO9A	0.333333	FRZB	0.0172974	FRZB
10784.1	PCDH17	7.98273	PNPLA3	-6604	FBXO16	8.25287e-05	CLCN3	1202	GOLGA4	0.333333	EDNRA	0.0172873	EDNRA
10772.5	CXCL13	7.98222	SLC1A5	-6604	PNPLA3	8.25287e-05	CAMK2A	1202	CETN3	0.333333	ASIC2	0.0172849	ASIC2
10770.9	ACLY	7.98069	TST	-6604	SLC1A5	8.25219e-05	INHBA	1202	RAB3B	0.333333	TMTC1	0.0172767	TMTC1
10759.2	MICAL2	7.98041	ERP27	-6604	TST	8.25151e-05	MAP3K8	1202	LPGAT1	0.333333	AIMP2	0.0172729	AIMP2
10759	IL4R	7.98034	SIX3	-6604	ERP27	8.25083e-05	TFRC	1202	COL4A2	0.333333	CREB3L2	0.0172695	CREB3L2
10752.6	LPP	7.98031	MAST2	-6604	SIX3	8.25083e-05	MSI2	1201	BASP1	0.333333	PAG1	0.017265	PAG1
10708.6	NEBL	7.97842	CRABP2	-6604	MAST2	8.25083e-05	WDFY3	1201	OGDH	0.333333	IFNG	0.017264	IFNG
10702	ACVRL1	7.97805	FBLN7	-6604	CRABP2	8.25083e-05	PID1	1201	MAP3K8	0.333333	UAP1	0.0172636	UAP1
10695.3	EP300	7.97799	CXCR1	-6604	FBLN7	8.25083e-05	NME1	1201	DLD	0.333333	LTBP1	0.0172616	LTBP1
10682.8	STMN2	7.97766	USP5	-6604	CXCR1	8.25083e-05	MCL1	1200	NFATC2	0.333333	SNRPA1	0.017246	SNRPA1
10682.1	BTC	7.97663	NUDT1	-6604	USP5	8.25014e-05	PPIF	1200	FOXA1	0.333333	CHEK2	0.0172439	CHEK2
10665.7	TRDN	7.97462	APOBEC3C	-6604	NUDT1	8.25014e-05	CEMIP	1200	MMP9	0.333333	AMFR	0.017242	AMFR
10664.5	PELI2	7.97382	CXCL14	-6604	APOBEC3C	8.25014e-05	HES1	1199	TRPM3	0.333333	PIEZO2	0.0172368	PIEZO2
10652.7	ADAMTS1	7.97238	SPRED1	-6604	CXCL14	8.24946e-05	FAM189A2	1199	CORO2B	0.333333	BLVRB	0.0172362	BLVRB
10652.2	ACACA	7.97177	ZMYM3	-6604	SPRED1	8.24946e-05	TFPI2	1199	CHD1	0.333333	PLD1	0.0172319	PLD1
10646.1	VAT1L	7.97126	DTX4	-6604	ZMYM3	8.24878e-05	ABCC2	1199	NGF	0.333333	MAP3K8	0.0172312	MAP3K8
10644.9	KLF4	7.97102	SLC17A5	-6604	DTX4	8.24878e-05	CALCOCO2	1199	HNRNPU	0.333333	INCENP	0.0172253	INCENP
10643.7	IGF2BP2	7.96967	NKIRAS1	-6604	SLC17A5	8.24742e-05	PDE7B	1198	PRMT2	0.333333	DICER1	0.0172234	DICER1
10628	PAK1	7.96765	KAT2A	-6604	NKIRAS1	8.24742e-05	KCNK1	1198	NEBL	0.333333	MARCKSL1	0.0172229	MARCKSL1
10621.7	NCOA4	7.96762	TRPM2	-6604	KAT2A	8.24742e-05	HIVEP1	1198	RPL34	0.333333	COL17A1	0.0172218	COL17A1
10621	TUBA4A	7.96612	MAGED1	-6604	TRPM2	8.24742e-05	LNPEP	1198	CD44	0.333333	TFDP1	0.017217	TFDP1
10612.6	ST3GAL1	7.96476	NUP210	-6604	MAGED1	8.24742e-05	IDS	1197	STEAP1	0.333333	ILK	0.0172108	ILK
10611.3	INHBA	7.96455	FHL5	-6604	NUP210	8.24742e-05	CNN3	1197	CTSH	0.333333	HDAC2	0.0172066	HDAC2
10608.8	TUBG1	7.96445	C1orf216	-6604	FHL5	8.24674e-05	GATA6	1197	CAPNS1	0.333333	TBC1D8	0.0172051	TBC1D8
10606.1	BCOR	7.95978	PIGH	-6604	C1orf216	8.24674e-05	KPNB1	1197	BCHE	0.333333	TNFSF10	0.0172009	TNFSF10
10602	TNFRSF21	7.9587	ULK3	-6604	PIGH	8.24606e-05	DOK2	1197	HIVEP1	0.333333	SIPA1L2	0.0171946	SIPA1L2
10598.5	KCNK1	7.95731	ING1	-6604	ULK3	8.24606e-05	MYD88	1197	STAT5A	0.333333	ASPN	0.0171936	ASPN
10595.9	PROM1	7.95701	IL34	-6604	ING1	8.24606e-05	MAPK3	1196	BNIP3	0.333333	COX5A	0.0171905	COX5A
10595.2	CHMP2A	7.95639	AQP3	-6604	IL34	8.24606e-05	CENPF	1196	PTN	0.333333	TRDN	0.0171891	TRDN
10591.8	TRIM24	7.95433	TEX30	-6604	AQP3	8.24538e-05	EEF1A2	1196	ZMIZ1	0.333333	COL6A3	0.0171801	COL6A3
10585	MYO1B	7.95241	BDKRB1	-6604	TEX30	8.24538e-05	LRRFIP1	1195	GRB14	0.333333	ANTXR1	0.0171777	ANTXR1
10581.4	DAAM2	7.95141	KSR1	-6604	BDKRB1	8.24538e-05	TF	1195	TFPI2	0.333333	CPB2	0.0171726	CPB2
10574	TFDP1	7.95067	MLEC	-6604	KSR1	8.24538e-05	COL5A1	1195	IDS	0.333333	ENAH	0.0171696	ENAH
10571.3	CHUK	7.94974	RASL10A	-6604	MLEC	8.2447e-05	ZMYND11	1195	GATA6	0.333333	FOLH1	0.0171653	FOLH1
10569.3	TRPM3	7.9484	MTX1	-6604	RASL10A	8.24402e-05	COL4A2	1195	TF	0.333333	VCAN	0.0171653	VCAN
10568.1	DPT	7.94657	SYTL1	-6604	MTX1	8.24334e-05	TUFT1	1195	TJP1	0.333333	SOX6	0.0171555	SOX6
10567.7	BNC2	7.94496	SLC19A3	-6604	SYTL1	8.24334e-05	THBS2	1195	GSK3B	0.333333	MEF2A	0.0171524	MEF2A
10565.7	ARNT	7.94395	ARSG	-6604	SLC19A3	8.24334e-05	KRAS	1194	PECAM1	0.333333	GRB14	0.0171521	GRB14
10562.6	ZFC3H1	7.9438	CLCN7	-6604	ARSG	8.24334e-05	CHD9	1194	ZMYND11	0.333333	THBS2	0.0171483	THBS2
10554.5	ITGA5	7.94323	PARP3	-6604	CLCN7	8.24334e-05	CDK2	1193	GABRB3	0.333333	HMGB2	0.0171478	HMGB2
10552	MAN2A1	7.94	TRIB3	-6604	PARP3	8.24266e-05	RPS6KA1	1193	MICAL2	0.333333	IL6ST	0.0171415	IL6ST
10550.8	CYP51A1	7.93999	SGSM2	-6604	TRIB3	8.24266e-05	TRDN	1193	ARNT	0.333333	GPAM	0.0171403	GPAM
10549.8	BTG1	7.9391	BCAP31	-6604	SGSM2	8.24266e-05	IWS1	1193	ASPN	0.333333	OAT	0.0171392	OAT
10549	SMOX	7.93835	PAK4	-6604	BCAP31	8.24198e-05	ADRA2A	1192	AIMP2	0.333333	CYP27A1	0.0171374	CYP27A1
10548.6	SLC4A8	7.93821	KRT31	-6604	PAK4	8.24198e-05	HDGF	1192	CSNK1E	0.333333	LIFR	0.0171355	LIFR
10545.7	CD58	7.93817	NOX1	-6604	KRT31	8.24198e-05	BTC	1192	LTBP1	0.333333	CNTN2	0.0171227	CNTN2
10535.2	GLUD1	7.93673	CCNB1IP1	-6604	NOX1	8.24198e-05	LARP6	1191	VAT1L	0.333333	GPHN	0.0171211	GPHN
10529.8	EPAS1	7.93658	ATP13A1	-6604	CCNB1IP1	8.24198e-05	GRIA4	1191	REV3L	0.333333	PIK3C2A	0.0171192	PIK3C2A
10525.1	MYOM1	7.93598	RASA3	-6604	ATP13A1	8.24131e-05	MGMT	1191	MARCKSL1	0.333333	TSPAN7	0.0171025	TSPAN7
10505.3	OSR2	7.93549	SPATA2	-6604	RASA3	8.24131e-05	BCL9	1191	CLCN3	0.333333	CD47	0.0170958	CD47
10500	CALCRL	7.93403	PPP1R3D	-6604	SPATA2	8.24063e-05	LAMA1	1191	PID1	0.333333	EPB41L2	0.0170895	EPB41L2
10495.6	GOLGA4	7.93352	TNMD	-6604	PPP1R3D	8.23995e-05	CALB2	1191	DPP4	0.333333	ANK1	0.0170851	ANK1
10490.7	SLC9A3R1	7.93312	WBP2	-6604	TNMD	8.23995e-05	PRKCZ	1191	PLP1	0.333333	CSNK2A2	0.0170763	CSNK2A2
10481.1	LAPTM5	7.9331	POMC	-6604	WBP2	8.23995e-05	ST5	1190	PPIF	0.333333	NGF	0.0170604	NGF
10479.9	ITGA4	7.93154	CHRDL1	-6604	POMC	8.23995e-05	MLH1	1190	CBX5	0.333333	SHROOM3	0.0170554	SHROOM3
10473.3	CTSC	7.93106	KCNK5	-6604	CHRDL1	8.23995e-05	CSE1L	1190	SNAP91	0.333333	LCP2	0.0170432	LCP2
10465.3	THY1	7.92952	AGPAT2	-6604	KCNK5	8.23927e-05	GOLGA2	1189	ZCCHC7	0.333333	GOLGA2	0.0170398	GOLGA2
10462.4	PDE7B	7.92875	ERC2	-6604	AGPAT2	8.23927e-05	KAT2B	1189	DACT1	0.333333	ACSL3	0.0170369	ACSL3
10461.4	SLC25A1	7.92859	SLC25A10	-6604	ERC2	8.23927e-05	PIAS1	1188	ZRANB2	0.333333	SP3	0.0170276	SP3
10450.3	ARGLU1	7.92678	BCAN	-6604	SLC25A10	8.23927e-05	CHUK	1188	RASGRP1	0.333333	RPS6KA5	0.0170123	RPS6KA5
10447.6	PTPRN2	7.92591	GSTK1	-6604	BCAN	8.23927e-05	CBX5	1188	TFRC	0.333333	AGPAT4	0.0170067	AGPAT4
10443.7	PRKCH	7.92511	FAM149B1	-6604	GSTK1	8.23859e-05	MAP3K10	1188	WIPF1	0.333333	PTBP3	0.0170042	PTBP3
10442.5	ZDHHC14	7.92485	SCGB3A1	-6604	FAM149B1	8.23859e-05	TMSB10	1186	ZFC3H1	0.333333	ADAM12	0.0170021	ADAM12
10429.8	CLTC	7.92484	OARD1	-6604	SCGB3A1	8.23859e-05	CAPN1	1186	ST5	0.333333	FEN1	0.0170006	FEN1
10428.1	ANK1	7.9245	CBX4	-6604	OARD1	8.23859e-05	CREB3L2	1186	ARF4	0.333333	DYM	0.0169979	DYM
10425.1	ST5	7.92392	SLC7A4	-6604	CBX4	8.23859e-05	DCT	1185	ARHGAP20	0.333333	YWHAE	0.0169942	YWHAE
10420.8	F9	7.92356	SLC25A1	-6604	SLC7A4	8.23859e-05	PDE3A	1185	TSHZ3	0.333333	CHD1	0.016992	CHD1
10414.5	RHOT1	7.92316	DGAT2	-6604	SLC25A1	8.23859e-05	ARF4	1185	ZNF521	0.333333	SIAH1	0.0169828	SIAH1
10413	IRAK1	7.92314	FASN	-6604	DGAT2	8.23859e-05	KIF11	1185	EIF4A1	0.333333	CENPF	0.0169826	CENPF
10408.8	TFRC	7.92232	IL3	-6604	FASN	8.23791e-05	ITGA10	1184	PSAT1	0.333333	KITLG	0.0169806	KITLG
10408.3	TMEM200A	7.92014	GIMAP6	-6604	IL3	8.23791e-05	PTTG1	1183	TRDN	0.333333	TET2	0.0169773	TET2
10407	MOXD1	7.91924	PABPC1L	-6604	GIMAP6	8.23791e-05	DPP4	1183	VCAN	0.333333	CORO2B	0.0169752	CORO2B
10399	THRB	7.91811	REPIN1	-6604	PABPC1L	8.23791e-05	RPL34	1183	NRP1	0.333333	CALCOCO2	0.0169623	CALCOCO2
10392.9	DCTD	7.91702	ANKMY2	-6604	REPIN1	8.23791e-05	TJP1	1183	RPA2	0.333333	HIVEP1	0.0169582	HIVEP1
10391.8	PPFIBP1	7.91557	MICB	-6604	ANKMY2	8.23791e-05	LAMB1	1182	UAP1	0.333333	ABCC4	0.0169563	ABCC4
10391.6	TLE4	7.91367	NPPB	-6604	MICB	8.23723e-05	TNPO1	1182	IFNGR2	0.333333	ARF4	0.0169457	ARF4
10385.6	PRMT2	7.91247	C1GALT1C1	-6604	NPPB	8.23723e-05	CCT5	1182	HAT1	0.333333	COL4A2	0.0169453	COL4A2
10385.3	TPK1	7.91211	RBM4B	-6604	C1GALT1C1	8.23655e-05	ANK1	1182	CCNA2	0.333333	ALMS1	0.016933	ALMS1
10384.4	MMP3	7.91033	SLC2A4RG	-6604	RBM4B	8.23655e-05	ARNT	1181	CHD9	0.333333	SPTAN1	0.0169317	SPTAN1
10384.2	KPNB1	7.90963	RRAGD	-6604	SLC2A4RG	8.23655e-05	CDH5	1181	RPS6KA1	0.333333	CANX	0.0169251	CANX
10377.2	PDLIM5	7.90962	FAM83B	-6604	RRAGD	8.23655e-05	SRC	1181	FRZB	0.333333	MAPK10	0.0169153	MAPK10
10364.2	BAG3	7.90588	C22orf39	-6604	FAM83B	8.23588e-05	NRIP3	1180	WDFY3	0.333333	PPP6C	0.0169038	PPP6C
10363.3	TUFT1	7.90528	SH3BGRL3	-6604	C22orf39	8.23588e-05	CUL3	1180	DOK2	0.333333	TP53BP2	0.0169024	TP53BP2
10355.7	MAP3K8	7.90407	CDX2	-6604	SH3BGRL3	8.23588e-05	MMP9	1180	GRIA4	0.333333	MTTP	0.0168998	MTTP
10355.2	COX6A2	7.90352	BMF	-6604	CDX2	8.23588e-05	IRF8	1180	LAMA1	0.333333	ITPR2	0.0168992	ITPR2
10349.3	STARD13	7.90276	CAPN15	-6604	BMF	8.23588e-05	VCAN	1179	BCOR	0.333333	PROC	0.0168946	PROC
10348.8	CBS	7.90134	TRPV6	-6604	CAPN15	8.2352e-05	VTI1A	1179	CALCOCO2	0.333333	SLCO2A1	0.0168902	SLCO2A1
10348.2	PSAT1	7.90059	UBD	-6604	TRPV6	8.23452e-05	TLN1	1179	EDNRA	0.333333	MYO10	0.0168808	MYO10
10347.6	CDK14	7.89602	LEFTY2	-6604	UBD	8.23384e-05	KLF4	1178	LNPEP	0.333333	UGP2	0.0168772	UGP2
10332.1	DNMT1	7.8954	MYO5B	-6604	LEFTY2	8.23384e-05	PAG1	1178	THBS2	0.333333	ABCC2	0.0168757	ABCC2
10327.8	ITPR2	7.89458	SLC2A14	-6604	MYO5B	8.23384e-05	UGP2	1178	RPS6KA5	0.333333	EEF1A2	0.0168749	EEF1A2
10326.9	NFATC2	7.89381	GYG2	-6604	SLC2A14	8.23384e-05	WIPF1	1177	IFNAR2	0.333333	PTPN14	0.0168731	PTPN14
10304.6	RPS6KA5	7.89201	MADD	-6604	GYG2	8.23384e-05	ITGA5	1177	MEF2A	0.333333	WIPF1	0.0168696	WIPF1
10301.9	ABAT	7.89136	CCDC8	-6604	MADD	8.23249e-05	RPS6KA5	1176	ACTL8	0.333333	PCSK5	0.0168605	PCSK5
10295.5	SMAD2	7.89129	KYAT3	-6604	CCDC8	8.23249e-05	NDFIP2	1176	ARHGAP18	0.333333	ANKRD28	0.0168547	ANKRD28
10289.5	PGF	7.89059	MYOG	-6604	KYAT3	8.23249e-05	SLCO2A1	1176	IL1R1	0.333333	MGMT	0.0168545	MGMT
10285.5	IRF6	7.89032	COX6A2	-6604	MYOG	8.23181e-05	RAB13	1176	PLCG2	0.333333	ST5	0.0168479	ST5
10281.6	KLK6	7.89015	SETD3	-6604	COX6A2	8.23181e-05	SIAH1	1175	DYSF	0.333333	FRAS1	0.0168375	FRAS1
10280.9	ING1	7.89	SGSM3	-6604	SETD3	8.23181e-05	TOM1L1	1175	CAPZA2	0.333333	RB1	0.0168353	RB1
10277.2	TAT	7.88975	NKX3-1	-6604	SGSM3	8.23181e-05	CASP3	1175	CTSB	0.333333	LGR4	0.0168273	LGR4
10267.4	BDH1	7.88935	TCP11L2	-6604	NKX3-1	8.23113e-05	SGK1	1175	SMAD3	0.333333	DPP4	0.0168187	DPP4
10262.2	LCP2	7.88762	HIST1H4B	-6604	TCP11L2	8.23113e-05	VPS13D	1174	EMP3	0.333333	CDH5	0.0168092	CDH5
10259.9	HUWE1	7.88581	ATP6V0D1	-6604	HIST1H4B	8.23113e-05	IL6ST	1174	SYBU	0.333333	TSC22D1	0.0168033	TSC22D1
10258.9	REL	7.88548	FGF8	-6604	ATP6V0D1	8.23113e-05	FGF7	1174	PKD2	0.333333	ARNT	0.0167964	ARNT
10258.5	CTGF	7.88506	ST14	-6604	FGF8	8.23045e-05	SNRPA	1174	SLCO2A1	0.333333	PKP2	0.016796	PKP2
10258.5	RAB13	7.88476	PTPMT1	-6604	ST14	8.23045e-05	SDC1	1174	MMP3	0.333333	MET	0.016793	MET
10250.5	THBS2	7.88382	PRDM16	-6604	PTPMT1	8.23045e-05	PNRC1	1174	PTPN1	0.333333	CAP1	0.0167913	CAP1
10241.3	WIPF1	7.88249	ING4	-6604	PRDM16	8.23045e-05	NRP1	1173	TNPO1	0.333333	RACGAP1	0.0167903	RACGAP1
10237.8	USP13	7.8808	CALCR	-6604	ING4	8.22978e-05	SLC1A3	1173	USP13	0.333333	UBL3	0.0167877	UBL3
10232.5	TIPARP	7.88049	MSLN	-6604	CALCR	8.22978e-05	IFNAR2	1173	MET	0.333333	CD44	0.0167847	CD44
10230.2	CTBP2	7.87721	CLDN3	-6604	MSLN	8.22978e-05	FRZB	1172	PTTG1	0.333333	ARPP21	0.0167778	ARPP21
10226.5	LAMA1	7.87656	EPX	-6604	CLDN3	8.2291e-05	ITPR2	1172	SNRPA	0.333333	ETV1	0.0167762	ETV1
10201.1	LGR4	7.87586	ZGPAT	-6604	EPX	8.2291e-05	SNAP91	1172	SHC1	0.333333	MIS18BP1	0.0167729	MIS18BP1
10200.6	SMAD4	7.87402	MAP4K2	-6604	ZGPAT	8.2291e-05	TNS3	1172	RFC4	0.333333	PNRC1	0.0167697	PNRC1
10192.1	ZRANB2	7.87368	TDRD7	-6604	MAP4K2	8.2291e-05	RELA	1171	SOX1	0.333333	SLC41A2	0.0167686	SLC41A2
10192.1	MCL1	7.86967	CCL17	-6604	TDRD7	8.2291e-05	SPAG9	1171	BCL9	0.333333	PON2	0.0167669	PON2
10191.5	CASP3	7.86959	CMPK2	-6604	CCL17	8.22842e-05	BTG1	1171	ADAM12	0.333333	IFNAR2	0.0167665	IFNAR2
10191	HAT1	7.8679	ESRRA	-6604	CMPK2	8.22842e-05	ACACA	1170	CDON	0.333333	ENC1	0.0167612	ENC1
10187	POLA1	7.8667	PLPP2	-6604	ESRRA	8.22774e-05	HACD1	1170	CAPN1	0.333333	SGK1	0.0167606	SGK1
10182.9	INCENP	7.8648	SYT17	-6604	PLPP2	8.22774e-05	ECE1	1170	DICER1	0.333333	KPNB1	0.0167519	KPNB1
10160.5	EFNA5	7.86415	PEF1	-6604	SYT17	8.22774e-05	CUL1	1170	EIF3E	0.333333	CAPZA2	0.0167519	CAPZA2
10156.8	ANXA6	7.86146	KRT20	-6604	PEF1	8.22774e-05	ADAM12	1169	KLF4	0.333333	ASS1	0.0167516	ASS1
10153.9	AQP4	7.85991	TOMM7	-6604	KRT20	8.22707e-05	PIEZO2	1169	MAP3K4	0.333333	FERMT2	0.0167499	FERMT2
10151.4	FGL1	7.85935	IFRD2	-6604	TOMM7	8.22707e-05	PRICKLE1	1169	TOP2A	0.333333	RB1CC1	0.0167496	RB1CC1
10151.1	CKAP4	7.85903	TUBGCP2	-6604	IFRD2	8.22707e-05	SEMA3C	1168	DCTN6	0.333333	CCNG2	0.0167456	CCNG2
10142.2	PLIN3	7.85827	CA4	-6604	TUBGCP2	8.22707e-05	DICER1	1168	CANX	0.333333	NDRG1	0.0167378	NDRG1
10139.1	SNAP25	7.8578	CLDN11	-6604	CA4	8.22639e-05	DDB2	1168	F9	0.333333	RAI2	0.0167309	RAI2
10138.3	ACSL3	7.85743	SHBG	-6604	CLDN11	8.22639e-05	SYNPO2	1167	ANK1	0.333333	IL4R	0.0167155	IL4R
10137.7	TFAP4	7.85478	OLAH	-6604	SHBG	8.22639e-05	MMP3	1166	LRRFIP1	0.333333	PDCD4	0.0167152	PDCD4
10137.2	AKAP1	7.85257	TMEM50B	-6604	OLAH	8.22639e-05	ASPN	1166	UGP2	0.333333	RNF150	0.0167129	RNF150
10132.5	PLP1	7.85175	CNTFR	-6604	TMEM50B	8.22639e-05	EP300	1166	SIAH1	0.333333	KIF11	0.016697	KIF11
10122	HACD2	7.85022	KDM1B	-6604	CNTFR	8.22571e-05	DYNC1H1	1166	GLUD1	0.333333	LPIN1	0.0166935	LPIN1
10120.4	ATP8B1	7.85017	RECQL4	-6604	KDM1B	8.22571e-05	FOXF2	1165	G2E3	0.333333	RAB2A	0.0166903	RAB2A
10119.8	CLDN10	7.84998	ABHD11	-6604	RECQL4	8.22571e-05	PROM1	1165	KCNK1	0.333333	CDC6	0.0166825	CDC6
10116.8	EPHA2	7.84984	WDTC1	-6604	ABHD11	8.22504e-05	INCENP	1165	FES	0.333333	CETN3	0.0166764	CETN3
10111.3	UGP2	7.84982	CMA1	-6604	WDTC1	8.22504e-05	PTBP3	1165	CNN1	0.333333	KAT2B	0.0166705	KAT2B
10102.5	MERTK	7.84976	HIST1H3D	-6604	CMA1	8.22436e-05	CAPZA2	1165	CXCL8	0.333333	PAPOLG	0.016669	PAPOLG
10101.9	SIAH1	7.84975	TNFSF13B	-6604	HIST1H3D	8.22436e-05	PDCD6IP	1164	PPP1R12A	0.333333	DUSP6	0.0166651	DUSP6
10100.9	FES	7.84815	SPOCD1	-6604	TNFSF13B	8.22368e-05	MST1R	1163	PLG	0.333333	CDC27	0.0166584	CDC27
10100	PHLDB1	7.84815	LHB	-6604	SPOCD1	8.22368e-05	ACSL3	1161	HDAC11	0.333333	IRF8	0.016656	IRF8
10094.9	STAT5A	7.84809	UBE2D4	-6604	LHB	8.22368e-05	CBS	1160	NDRG1	0.333333	AQP4	0.0166526	AQP4
10094.4	ORC5	7.8475	HOXC9	-6604	UBE2D4	8.22368e-05	RACGAP1	1160	CBS	0.333333	MAPT	0.016651	MAPT
10093.1	IRF8	7.84696	SDF2L1	-6604	HOXC9	8.22368e-05	HAT1	1159	ITGA10	0.333333	FCGRT	0.016644	FCGRT
10087.9	UNG	7.84683	CACNG6	-6604	SDF2L1	8.22301e-05	UNC13B	1159	FOXF2	0.333333	TPM4	0.0166435	TPM4
10084.2	PDLIM1	7.84663	P2RX1	-6604	CACNG6	8.22301e-05	VSNL1	1157	MAP3K10	0.333333	TEK	0.0166366	TEK
10081.2	TK1	7.8462	HERC5	-6604	P2RX1	8.22301e-05	CSNK1E	1157	PNRC1	0.333333	LTBP2	0.0166354	LTBP2
10068.8	LNPEP	7.84531	CEP290	-6604	HERC5	8.22301e-05	PKP2	1156	AQP4	0.333333	BTG1	0.0166218	BTG1
10065.6	IFNGR2	7.84519	MAPKBP1	-6604	CEP290	8.22301e-05	FOLH1	1156	DCK	0.333333	A2M	0.0166179	A2M
10056.8	DAPK2	7.84371	PSMB10	-6604	MAPKBP1	8.22233e-05	SHROOM3	1156	LTBP2	0.333333	SFRP1	0.0166159	SFRP1
10056.5	NEUROD2	7.8419	IGIP	-6604	PSMB10	8.22233e-05	SLC2A2	1156	CYTIP	0.333333	SOX1	0.0166107	SOX1
10053.7	CEMIP	7.84116	NR2E1	-6604	IGIP	8.22233e-05	AQP4	1156	YWHAQ	0.333333	INTU	0.0166053	INTU
10050.7	PIEZO2	7.84084	MAGEA1	-6604	NR2E1	8.22166e-05	BAAT	1155	PIK3C2A	0.333333	AKAP10	0.0165992	AKAP10
10047.3	PLP2	7.84	USP34	-6604	MAGEA1	8.22166e-05	DCK	1154	MST1R	0.333333	MAP3K4	0.0165869	MAP3K4
10045.9	RASGRP1	7.83875	TRIM3	-6604	USP34	8.22166e-05	PLD1	1154	SMAD7	0.333333	KIAA0922	0.0165746	KIAA0922
10037.6	MMP9	7.83738	CENPJ	-6604	TRIM3	8.22166e-05	CHN2	1154	ENC1	0.333333	CALB2	0.0165623	CALB2
10032	PTN	7.8373	GFRA2	-6604	CENPJ	8.22166e-05	SNAP25	1154	DNMT1	0.333333	TLE1	0.016556	TLE1
10030.4	YWHAQ	7.83642	STUB1	-6604	GFRA2	8.22098e-05	SFN	1153	MSI2	0.333333	ECE1	0.0165536	ECE1
10026.4	APLP2	7.83512	GAMT	-6604	STUB1	8.22098e-05	ANTXR1	1153	HDGF	0.333333	SNAP25	0.0165533	SNAP25
10014.7	WDFY3	7.83487	TSGA13	-6604	GAMT	8.22098e-05	MEF2A	1153	SEMA3C	0.333333	RAB13	0.0165508	RAB13
10005.9	CD63	7.83439	ZBED5	-6604	TSGA13	8.22098e-05	PIK3C2A	1153	PPP6C	0.333333	RPL34	0.01655	RPL34
10005.2	ARF4	7.83418	PLAGL2	-6604	ZBED5	8.22098e-05	CD44	1152	CEMIP	0.333333	B4GALT1	0.0165497	B4GALT1
9998.49	SH3D19	7.83382	MUC4	-6604	PLAGL2	8.22098e-05	AKT1	1152	FAM189A2	0.333333	UGCG	0.0165496	UGCG
9990.66	GLIPR1	7.83286	SLC10A1	-6604	MUC4	8.22098e-05	RRM1	1152	ACACA	0.333333	SNAP91	0.0165433	SNAP91
9988.81	ATF2	7.83285	MYBPH	-6604	SLC10A1	8.2203e-05	ANXA6	1152	MAPK10	0.333333	PROM1	0.0165363	PROM1
9982.6	CAPZA2	7.83236	PPP1R13L	-6604	MYBPH	8.2203e-05	ANKRD28	1151	PTBP3	0.333333	SPTA1	0.0165356	SPTA1
9980.14	ANKRD28	7.83159	KCNN4	-6604	PPP1R13L	8.2203e-05	BLMH	1151	KIF23	0.333333	FOXA1	0.016534	FOXA1
9968.75	EPCAM	7.83085	RBMS2	-6604	KCNN4	8.2203e-05	OGFRL1	1151	A2M	0.333333	CASP3	0.0165292	CASP3
9960.9	B4GALT1	7.83012	MECP2	-6604	RBMS2	8.2203e-05	PPP6C	1150	PKP2	0.333333	FZD1	0.0165289	FZD1
9959.31	NPC2	7.82944	C15orf48	-6604	MECP2	8.2203e-05	CDC27	1150	PTPN11	0.333333	INSIG1	0.0165278	INSIG1
9958.47	LTBR	7.82933	XDH	-6604	C15orf48	8.21963e-05	SOX6	1149	ADRA2A	0.333333	VSNL1	0.0165227	VSNL1
9943.97	LARP6	7.82769	MMP28	-6604	XDH	8.21963e-05	PPP1R12A	1149	MBL2	0.333333	CDK7	0.0165179	CDK7
9937.11	IDS	7.8271	ZNF544	-6604	MMP28	8.21963e-05	DLD	1148	PDE3A	0.333333	AIMP1	0.0165167	AIMP1
9934.41	LDHB	7.82553	MEGF6	-6604	ZNF544	8.21895e-05	SLC6A12	1148	VAV2	0.333333	MMP3	0.0165033	MMP3
9932.98	RHOA	7.8246	ANKRD1	-6604	MEGF6	8.21895e-05	TP53BP2	1148	SELL	0.333333	FLNA	0.0164954	FLNA
9930.67	DYSF	7.82453	ECI1	-6604	ANKRD1	8.21895e-05	KIAA0922	1147	SLC9A9	0.333333	ITGAM	0.0164859	ITGAM
9927.08	KCNJ3	7.82243	IFT46	-6604	ECI1	8.21895e-05	POLA1	1147	LARP6	0.333333	EFNB2	0.0164846	EFNB2
9926.01	C1orf21	7.82204	DEF8	-6604	IFT46	8.21828e-05	BNC2	1147	NRIP3	0.333333	PI4KB	0.0164791	PI4KB
9925.72	TNC	7.82	ECSIT	-6604	DEF8	8.21828e-05	PDCD4	1147	PFKM	0.333333	AHNAK	0.0164774	AHNAK
9919.89	IPO13	7.81818	ALDH3B1	-6604	ECSIT	8.21828e-05	GLUD1	1147	EPHA2	0.333333	BNC2	0.0164754	BNC2
9916.89	XRCC3	7.81757	TMEM237	-6604	ALDH3B1	8.21828e-05	CAP1	1147	PIK3CB	0.333333	VAV2	0.0164707	VAV2
9914.55	PRDX6	7.81612	PPP1R13B	-6604	TMEM237	8.21828e-05	CANX	1146	SDC1	0.333333	ITGB8	0.0164702	ITGB8
9914.21	ECE1	7.81561	KDM6B	-6604	PPP1R13B	8.21828e-05	RHOA	1146	ITPR2	0.333333	NRIP3	0.0164664	NRIP3
9906.33	TRIP13	7.81528	CSF3	-6604	KDM6B	8.21828e-05	RB1	1146	TNS3	0.333333	DHX15	0.0164568	DHX15
9902.41	CDK20	7.81482	LCN2	-6604	CSF3	8.2176e-05	PFKM	1146	CHN2	0.333333	NR2F2	0.0164527	NR2F2
9897.19	DLD	7.81249	IL20RB	-6604	LCN2	8.2176e-05	C1D	1146	LIFR	0.333333	BACE2	0.0164474	BACE2
9889.03	PCDH7	7.8114	MAF1	-6604	IL20RB	8.2176e-05	SCHIP1	1146	TLE1	0.333333	TMEM59	0.0164427	TMEM59
9887.03	TSPO	7.81133	CCAR2	-6604	MAF1	8.2176e-05	CCNG2	1145	BTC	0.333333	CTSB	0.0164413	CTSB
9883.88	CYTIP	7.81072	MGAT1	-6604	CCAR2	8.21693e-05	CCDC50	1145	BTG1	0.333333	YWHAG	0.0164396	YWHAG
9879.9	MSI2	7.80853	KDM2B	-6604	MGAT1	8.21693e-05	EDNRA	1145	BAAT	0.333333	SRC	0.0164139	SRC
9878.27	PLCG2	7.80576	PRTG	-6604	KDM2B	8.21625e-05	B4GALT1	1145	IL7R	0.333333	SMAD7	0.0164095	SMAD7
9877.59	SNAI2	7.80551	SRXN1	-6604	PRTG	8.21625e-05	ALMS1	1145	IL2RG	0.333333	MTSS1	0.0164091	MTSS1
9871.65	IGSF1	7.80484	LNX2	-6604	SRXN1	8.21625e-05	TMTC2	1144	SPAG9	0.333333	CADPS2	0.0163876	CADPS2
9859.06	DNAJB9	7.80372	ASH2L	-6604	LNX2	8.21625e-05	LIFR	1144	PROM1	0.333333	C1D	0.0163875	C1D
9855.23	PTPRC	7.80316	TSPAN31	-6604	ASH2L	8.21558e-05	LGR4	1144	PLD1	0.333333	TRIP10	0.0163873	TRIP10
9854.81	HIPK1	7.80069	TMEM263	-6604	TSPAN31	8.21558e-05	GPHN	1143	CREB3L2	0.333333	ZNF397	0.0163867	ZNF397
9842.3	ADGRB3	7.79882	ALOX15	-6604	TMEM263	8.21558e-05	GPAM	1143	MYOM1	0.333333	TMSB10	0.0163825	TMSB10
9842.27	CSE1L	7.79788	EIF4EBP1	-6604	ALOX15	8.21558e-05	PCSK5	1143	EPHB2	0.333333	KMT2A	0.0163819	KMT2A
9838.81	RAI2	7.79428	GKN1	-6604	EIF4EBP1	8.21558e-05	MAPK10	1143	KIF2C	0.333333	ACTL8	0.0163814	ACTL8
9837.05	ZEB1	7.79401	ATRNL1	-6604	GKN1	8.21558e-05	RB1CC1	1143	PSMA1	0.333333	MYD88	0.0163794	MYD88
9833.63	DMBT1	7.79181	DOHH	-6604	ATRNL1	8.2149e-05	RAI2	1142	LRRN1	0.333333	IGF2BP3	0.0163606	IGF2BP3
9833.31	WNT4	7.78901	SSTR4	-6604	DOHH	8.2149e-05	FRAS1	1142	DYNC1H1	0.333333	HGF	0.0163583	HGF
9832.51	PID1	7.78837	TMED7-TICAM2	-6604	SSTR4	8.2149e-05	INSIG1	1142	BLMH	0.333333	ENPP1	0.016355	ENPP1
9832.26	GATA6	7.78612	STRIP1	-6604	TMED7-TICAM2	8.2149e-05	PTPN14	1141	PAG1	0.333333	ADRA2A	0.0163462	ADRA2A
9825.09	G2E3	7.7853	ZFAND2A	-6604	STRIP1	8.2149e-05	TMEM59	1141	SGK1	0.333333	MED7	0.0163399	MED7
9824.61	COL5A1	7.78344	TTC28	-6604	ZFAND2A	8.2149e-05	MAP3K4	1141	ECE1	0.333333	SH3BGRL	0.0163368	SH3BGRL
9821.22	VAV2	7.78259	TNFRSF10C	-6604	TTC28	8.2149e-05	LTBP2	1141	INCENP	0.333333	SLC39A8	0.0163367	SLC39A8
9817.55	PIK3CB	7.77946	IL5RA	-6604	TNFRSF10C	8.21423e-05	SIPA1L2	1141	MNDA	0.333333	TRIM24	0.0163364	TRIM24
9813.41	HES1	7.77869	RGR	-6604	IL5RA	8.21423e-05	ABCC4	1140	IWS1	0.333333	SEPHS1	0.0163313	SEPHS1
9813.37	MAPK8IP2	7.77808	AMPD3	-6604	RGR	8.21355e-05	PI4KB	1140	CALB2	0.333333	KLF4	0.016325	KLF4
9802.39	E2F2	7.7772	ZNF232	-6604	AMPD3	8.21355e-05	SMAD7	1140	DCT	0.333333	ACACA	0.0163154	ACACA
9797.34	CREB3L2	7.77497	PKD1	-6604	ZNF232	8.21288e-05	SPINT2	1140	ACSL3	0.333333	AKAP12	0.0163142	AKAP12
9796.15	KIF23	7.77425	XPC	-6604	PKD1	8.21288e-05	CHMP2A	1140	MIS18BP1	0.333333	MLH1	0.0163099	MLH1
9793.77	CA2	7.77423	SPATA7	-6604	XPC	8.21288e-05	QSOX1	1139	GOLGA2	0.333333	F2R	0.0162933	F2R
9792.6	ATP1A1	7.77398	PCDHA11	-6604	SPATA7	8.21288e-05	TCN2	1139	TMSB10	0.333333	UNC13B	0.0162921	UNC13B
9792.17	CD40	7.77323	HSD17B7	-6604	PCDHA11	8.21288e-05	EPHA2	1139	PDCD6IP	0.333333	PLK1	0.016286	PLK1
9783.65	RRM1	7.77274	PLXNB1	-6604	HSD17B7	8.21288e-05	AGPAT4	1139	ANKRD28	0.333333	DOK2	0.0162838	DOK2
9783.02	SLCO2A1	7.77212	LIMK1	-6604	PLXNB1	8.21288e-05	TBC1D8	1139	KMT2A	0.333333	JAK1	0.0162814	JAK1
9779.27	ACO1	7.77163	HIF3A	-6604	LIMK1	8.2122e-05	IGF2BP3	1138	OGFRL1	0.333333	DCK	0.016277	DCK
9776.17	KIF11	7.77154	ABCA5	-6604	HIF3A	8.2122e-05	USP13	1138	AIMP1	0.333333	CHUK	0.0162761	CHUK
9774.33	PIAS1	7.7661	EI24	-6604	ABCA5	8.2122e-05	MYO10	1137	VPS13D	0.333333	ITGA5	0.0162641	ITGA5
9768.98	DCT	7.76573	IRF2BPL	-6604	EI24	8.2122e-05	UBL3	1137	SFN	0.333333	CSE1L	0.0162632	CSE1L
9766.53	SYBU	7.7653	RHBDF1	-6604	IRF2BPL	8.2122e-05	TLE1	1137	KIAA0922	0.333333	RBM25	0.0162603	RBM25
9764.65	PRDM16	7.76523	FOXRED2	-6604	RHBDF1	8.2122e-05	ENC1	1136	MYO10	0.333333	PLXDC1	0.0162555	PLXDC1
9759.16	FRZB	7.76411	PPP1R11	-6604	FOXRED2	8.2122e-05	LTBP1	1136	GBP2	0.333333	SKP2	0.0162501	SKP2
9754.47	KALRN	7.76389	ATG9A	-6604	PPP1R11	8.21153e-05	ENO2	1136	CSRP1	0.333333	NID2	0.0162491	NID2
9754.26	CDH17	7.76383	NCR1	-6604	ATG9A	8.21153e-05	CD93	1135	PTPN14	0.333333	CAPN2	0.016249	CAPN2
9750.97	GNAI3	7.75996	MLST8	-6604	NCR1	8.21153e-05	VAV2	1135	AGPAT4	0.333333	CDC42BPA	0.0162405	CDC42BPA
9747.35	PNRC1	7.75892	PLCE1	-6604	MLST8	8.21153e-05	AIMP1	1135	MMP2	0.333333	PRKCZ	0.016238	PRKCZ
9742.17	CDA	7.75759	NRG2	-6604	PLCE1	8.21085e-05	S100A11	1134	SLC1A3	0.333333	CNN1	0.016237	CNN1
9740.59	AOAH	7.75553	ATP5G2	-6604	NRG2	8.21085e-05	KIF23	1134	FOLH1	0.333333	FAM110B	0.0162356	FAM110B
9739.74	CLK2	7.75441	NEUROD2	-6604	ATP5G2	8.21085e-05	PON2	1134	CAP1	0.333333	ZFAND5	0.0162344	ZFAND5
9734.73	CCDC86	7.75316	KIF5C	-6604	NEUROD2	8.21085e-05	MET	1134	RB1CC1	0.333333	PPIF	0.0162309	PPIF
9730.63	BAD	7.75314	PUS1	-6604	KIF5C	8.21018e-05	ZNF397	1134	ATP1A1	0.333333	PHLDA1	0.0162292	PHLDA1
9728.33	ARL2BP	7.75314	CD276	-6604	PUS1	8.21018e-05	ATP1A1	1134	YWHAG	0.333333	FAM189A2	0.0162257	FAM189A2
9725.94	POSTN	7.75276	MPST	-6604	CD276	8.21018e-05	FES	1134	SRPK2	0.333333	TOB1	0.0162255	TOB1
9715.1	GBP2	7.75055	RABEPK	-6604	MPST	8.21018e-05	MIS18BP1	1133	ITGB3	0.333333	ARL15	0.0162253	ARL15
9714.74	TFPI2	7.75005	MLF2	-6604	RABEPK	8.21018e-05	ENAH	1132	MGMT	0.333333	CASP8	0.0162211	CASP8
9712.87	CDH5	7.74764	MT3	-6604	MLF2	8.21018e-05	MBL2	1132	SKP2	0.333333	KYNU	0.0162196	KYNU
9697.74	YWHAG	7.74751	SLC9A3	-6604	MT3	8.21018e-05	CASP8	1132	REL	0.333333	ADARB2	0.016208	ADARB2
9696.06	INPP1	7.74705	TRIM59	-6604	SLC9A3	8.20951e-05	TOB1	1131	ITGB8	0.333333	MCM3	0.0162077	MCM3
9695.19	CYP17A1	7.74673	ABCB6	-6604	TRIM59	8.20883e-05	TGFB3	1131	CCT6A	0.333333	CBS	0.0161952	CBS
9685.74	KIAA0922	7.74503	ZBTB17	-6604	ABCB6	8.20883e-05	GBP2	1130	DDB2	0.333333	SMAD4	0.0161902	SMAD4
9683.64	LPGAT1	7.7449	TLE3	-6604	ZBTB17	8.20816e-05	CXCL13	1130	CCNG2	0.333333	MMP9	0.0161865	MMP9
9675.52	ELP4	7.74219	TRIM8	-6604	TLE3	8.20816e-05	CD47	1130	DUSP6	0.333333	ANXA6	0.0161739	ANXA6
9668.24	SLC39A8	7.74215	CCR9	-6604	TRIM8	8.20816e-05	SMAD4	1130	FCER1G	0.333333	BCAS3	0.0161658	BCAS3
9666.93	CTSH	7.7418	BIK	-6604	CCR9	8.20749e-05	SNAI2	1130	CAPN2	0.333333	SDC2	0.0161641	SDC2
9661.7	MANF	7.74176	POLB	-6604	BIK	8.20749e-05	YWHAG	1130	PTEN	0.333333	HNF1B	0.016164	HNF1B
9649.79	HNF1B	7.73945	KLF16	-6604	POLB	8.20749e-05	ENPP1	1129	TOM1L1	0.333333	CSNK1E	0.0161633	CSNK1E
9646.68	FLRT3	7.73862	AKR7A3	-6604	KLF16	8.20749e-05	CYTIP	1129	ARHGDIB	0.333333	RALB	0.0161615	RALB
9645.38	PAG1	7.73829	PPM1H	-6604	AKR7A3	8.20681e-05	CA2	1129	STAT1	0.333333	USP13	0.0161593	USP13
9640.81	CXCL8	7.73808	HOXA5	-6604	PPM1H	8.20681e-05	WHSC1	1128	TP53BP2	0.333333	TGFB3	0.0161582	TGFB3
9638.59	CLCN3	7.73748	TMEM170B	-6604	HOXA5	8.20681e-05	PIK3CB	1128	KITLG	0.333333	MED14	0.0161575	MED14
9630.73	NMU	7.73639	SLC12A3	-6604	TMEM170B	8.20681e-05	TET2	1128	ITGA4	0.333333	PIK3CB	0.0161478	PIK3CB
9619.27	KAT2A	7.73337	IL17D	-6604	SLC12A3	8.20681e-05	NID2	1127	TMEM59	0.333333	CRTAP	0.0161473	CRTAP
9619.1	CENPF	7.7329	P3H3	-6604	IL17D	8.20681e-05	STAT5A	1127	ENO2	0.333333	MBL2	0.0161465	MBL2
9603.38	PICALM	7.73278	CERS2	-6604	P3H3	8.20614e-05	INPP1	1127	IL2RB	0.333333	ADAM10	0.0161385	ADAM10
9599.37	ANTXR1	7.73218	ITGA10	-6604	CERS2	8.20614e-05	ITGB8	1126	B4GALT1	0.333333	BLMH	0.0161378	BLMH
9598.67	SRPK2	7.73194	HIST1H4F	-6604	ITGA10	8.20546e-05	EPCAM	1126	TGFB3	0.333333	SNAI2	0.0161276	SNAI2
9598.52	ADAM12	7.72943	SCN5A	-6604	HIST1H4F	8.20546e-05	CLU	1125	PIEZO2	0.333333	TLN1	0.0161263	TLN1
9597.1	BCL9	7.72919	BTBD11	-6604	SCN5A	8.20546e-05	PTPN1	1125	TSC22D1	0.333333	NAMPT	0.0161182	NAMPT
9592.41	SRPRB	7.72836	NDRG4	-6604	BTBD11	8.20479e-05	OSR2	1124	PDE7B	0.333333	KCNJ2	0.0161182	KCNJ2
9591.97	CDC25B	7.72771	COMT	-6604	NDRG4	8.20479e-05	DYM	1124	ANXA6	0.333333	CSF1R	0.016118	CSF1R
9591.29	ZNF397	7.72738	CDCA7L	-6604	COMT	8.20479e-05	MED7	1124	UBL3	0.333333	TERF2	0.016115	TERF2
9590.37	ITGAV	7.7247	COMMD8	-6604	CDCA7L	8.20479e-05	TSC22D1	1124	NAMPT	0.333333	CHODL	0.0161149	CHODL
9590.09	EMILIN1	7.72376	CROT	-6604	COMMD8	8.20479e-05	CTSB	1123	RACGAP1	0.333333	CCT5	0.0161126	CCT5
9585.94	EIF3E	7.72177	EPHA6	-6604	CROT	8.20479e-05	TEK	1123	ANTXR1	0.333333	DYNC1H1	0.0161086	DYNC1H1
9583.82	TP53BP2	7.72174	DKK1	-6604	EPHA6	8.20412e-05	CCDC86	1123	TAT	0.333333	MSX2	0.0161085	MSX2
9582.49	TCN2	7.72101	RETSAT	-6604	DKK1	8.20412e-05	LDHB	1123	EZH2	0.333333	FOXF2	0.0161061	FOXF2
9581.22	LAMB1	7.72078	SLAIN2	-6604	RETSAT	8.20412e-05	SEPHS1	1122	PON2	0.333333	PANX1	0.0161047	PANX1
9577.84	VTI1A	7.72035	PPP1R1C	-6604	SLAIN2	8.20412e-05	SKP2	1122	TRIM24	0.333333	ELK3	0.0160977	ELK3
9576.1	CYP26A1	7.71985	NAA30	-6604	PPP1R1C	8.20412e-05	KITLG	1122	FOXM1	0.333333	PTPN3	0.0160964	PTPN3
9569.04	TSC1	7.71701	ITPK1	-6604	NAA30	8.20412e-05	DUSP6	1122	FGF1	0.333333	HHIP	0.0160949	HHIP
9563.99	PECAM1	7.71685	IFNA1	-6604	ITPK1	8.20345e-05	SLC4A8	1122	ORC2	0.333333	CLU	0.0160924	CLU
9554.33	BTAF1	7.71588	SLC27A3	-6604	IFNA1	8.20345e-05	NAMPT	1121	IGF2BP3	0.333333	ARGLU1	0.0160829	ARGLU1
9553.92	RPA2	7.71507	FOXA2	-6604	SLC27A3	8.20277e-05	ARGLU1	1121	CSF1R	0.333333	FGF1	0.0160819	FGF1
9551.44	GRIA4	7.71402	MORC2	-6604	FOXA2	8.20277e-05	TMTC1	1121	MAPT	0.333333	MSH2	0.0160816	MSH2
9549.35	RAB5B	7.71267	MYBPC3	-6604	MORC2	8.20277e-05	AKAP10	1120	PCSK5	0.333333	HNMT	0.0160751	HNMT
9545.21	ORC1	7.71195	PHC3	-6604	MYBPC3	8.20277e-05	FZD1	1120	LAMA3	0.333333	EPCAM	0.0160711	EPCAM
9542.19	HACD1	7.71088	GNB3	-6604	PHC3	8.20277e-05	A2M	1119	TUFT1	0.333333	SLTM	0.0160646	SLTM
9537.24	INHBB	7.71066	TREX1	-6604	GNB3	8.20277e-05	JAK1	1119	CD93	0.333333	IL1R1	0.0160578	IL1R1
9534.36	QSOX1	7.70984	USF1	-6604	TREX1	8.2021e-05	CSTA	1119	SDC2	0.333333	RIT1	0.0160523	RIT1
9531.14	FURIN	7.70979	HSPA1L	-6604	USF1	8.2021e-05	PDLIM1	1119	HPRT1	0.333333	PDE4B	0.0160471	PDE4B
9528.1	HSD17B2	7.70957	PRAP1	-6604	HSPA1L	8.2021e-05	SLC39A8	1119	STK4	0.333333	RHOA	0.0160429	RHOA
9524.73	SERPINF2	7.70822	SPINT2	-6604	PRAP1	8.2021e-05	HNF1B	1119	NR2F2	0.333333	DNAJB9	0.0160379	DNAJB9
9521.93	TGFB3	7.7081	CSRP3	-6604	SPINT2	8.2021e-05	EPB41L2	1119	FBLN5	0.333333	KDM2A	0.0160377	KDM2A
9519.27	AR	7.70666	ACSS1	-6604	CSRP3	8.2021e-05	CNN1	1119	JAK2	0.333333	ELP4	0.0160343	ELP4
9501.47	TF	7.70445	MFN2	-6604	ACSS1	8.20143e-05	CD83	1118	VSNL1	0.333333	REL	0.0160306	REL
9497.42	MAPK10	7.7036	GORASP1	-6604	MFN2	8.20143e-05	TERF2	1118	ENPP1	0.333333	SPEN	0.0160305	SPEN
9497.17	SGK1	7.7024	GTPBP2	-6604	GORASP1	8.20143e-05	LPIN1	1118	WHSC1	0.333333	CD83	0.0160248	CD83
9481.5	OS9	7.70056	TSPAN13	-6604	GTPBP2	8.20143e-05	UGCG	1118	TERF2	0.333333	AXL	0.0160227	AXL
9479.81	EGR3	7.70053	MTHFR	-6604	TSPAN13	8.20075e-05	RNF150	1118	TUBB2A	0.333333	HDGF	0.016021	HDGF
9479.09	PTPN1	7.69992	SMARCAL1	-6604	MTHFR	8.20075e-05	BACE2	1117	RAB13	0.333333	PTPN1	0.0160164	PTPN1
9474.8	LGALS3	7.69948	MRPL24	-6604	SMARCAL1	8.20075e-05	TXNRD1	1117	SIPA1L2	0.333333	IFNAR1	0.0160159	IFNAR1
9474.34	MAP3K4	7.69802	EYA3	-6604	MRPL24	8.20008e-05	INTU	1117	ATR	0.333333	GSE1	0.016013	GSE1
9470.81	ARHGAP20	7.69771	MVD	-6604	EYA3	8.20008e-05	UNG	1116	CLU	0.333333	AGTR1	0.0160098	AGTR1
9469.35	IRF3	7.69737	RNFT2	-6604	MVD	8.20008e-05	MANF	1116	AOAH	0.333333	RERG	0.0160077	RERG
9465.96	CASP8	7.69573	CLGN	-6604	RNFT2	8.20008e-05	FERMT2	1116	MCM7	0.333333	GLUD1	0.016001	GLUD1
9464.65	BMP10	7.69112	NMU	-6604	CLGN	8.20008e-05	ANXA7	1115	HACD1	0.333333	FOSL1	0.0159982	FOSL1
9460.35	PTPRG	7.69073	DGKZ	-6604	NMU	8.20008e-05	PLP1	1115	SOX6	0.333333	KCND3	0.015995	KCND3
9454.31	RAPGEF5	7.68805	METTL18	-6604	DGKZ	8.19941e-05	MSX2	1115	LDHB	0.333333	RSPO3	0.015993	RSPO3
9452.52	CEP350	7.68797	COQ3	-6604	METTL18	8.19941e-05	KDM2A	1115	FZD1	0.333333	RGS5	0.0159904	RGS5
9446.85	TSG101	7.68788	TMEM255A	-6604	COQ3	8.19941e-05	SH3BGRL	1115	EPB41L2	0.333333	CSRP1	0.0159898	CSRP1
9445.22	AXIN1	7.68633	MECR	-6604	TMEM255A	8.19941e-05	ACSL1	1115	BCL2	0.333333	WHSC1	0.0159862	WHSC1
9440.59	WHSC1	7.68626	SSX2IP	-6604	MECR	8.19941e-05	YWHAQ	1114	ZNF397	0.333333	EP300	0.0159769	EP300
9440.27	C4BPA	7.68181	MXD4	-6604	SSX2IP	8.19941e-05	SDC2	1114	CXCL13	0.333333	POLA1	0.0159755	POLA1
9434.3	MSX2	7.68093	ALDOC	-6604	MXD4	8.19941e-05	CSF1R	1114	HSPA9	0.333333	CTPS1	0.0159693	CTPS1
9431.23	CTCF	7.67812	CTAG1B	-6604	ALDOC	8.19941e-05	IL1R1	1114	EEF1A1	0.333333	SDC1	0.0159661	SDC1
9426.31	PTPRF	7.67694	CKM	-6604	CTAG1B	8.19874e-05	PLCG2	1113	SLC6A12	0.333333	CYP26B1	0.0159627	CYP26B1
9412.75	PLIN1	7.67614	PLA2G1B	-6604	CKM	8.19874e-05	KMT2A	1113	PDCD4	0.333333	FBN2	0.0159579	FBN2
9412.66	CD44	7.67563	CHMP1A	-6604	PLA2G1B	8.19874e-05	TPM4	1113	OSR2	0.333333	CUL1	0.0159547	CUL1
9411.55	ACSL1	7.67501	CEP41	-6604	CHMP1A	8.19807e-05	FMO4	1113	ANXA7	0.333333	EPHB2	0.0159488	EPHB2
9410.43	SELP	7.67299	CRTAC1	-6604	CEP41	8.19807e-05	ACSF2	1113	TSG101	0.333333	CYP1B1	0.015943	CYP1B1
9409.64	PI4KB	7.67259	GPR160	-6604	CRTAC1	8.19807e-05	MYOM1	1112	CD47	0.333333	PTEN	0.015942	PTEN
9407.86	CLEC2D	7.67245	HACD3	-6604	GPR160	8.19807e-05	PHB	1112	TPM4	0.333333	TP53	0.0159407	TP53
9406.36	SHROOM3	7.66925	ADGRE1	-6604	HACD3	8.19807e-05	SLTM	1112	KCNJ2	0.333333	MAPK3	0.0159318	MAPK3
9402.08	IFNAR2	7.66774	NFKBIB	-6604	ADGRE1	8.19807e-05	AQP9	1112	FUS	0.333333	NAV3	0.0159315	NAV3
9400.88	PDE3A	7.66571	RPL17	-6604	NFKBIB	8.19807e-05	KCNJ2	1111	INSIG1	0.333333	QSOX1	0.0159315	QSOX1
9397.7	ASPN	7.66211	DCLRE1A	-6604	RPL17	8.19807e-05	SFRP1	1111	SLC39A8	0.333333	GRK3	0.015929	GRK3
9397.55	AGPAT4	7.66132	KRT8	-6604	DCLRE1A	8.19807e-05	FCER1G	1111	NCL	0.333333	SERPINB1	0.0159234	SERPINB1
9391.25	PKP2	7.66086	PHLDA3	-6604	KRT8	8.19739e-05	HGF	1110	UNC13B	0.333333	VOPP1	0.0159203	VOPP1
9390.93	NUP155	7.66007	SLC39A9	-6604	PHLDA3	8.19739e-05	RAB2A	1110	CA2	0.333333	CXCL13	0.0159185	CXCL13
9370.39	SOX6	7.65771	CLTCL1	-6604	SLC39A9	8.19739e-05	SRPK2	1110	EFNB2	0.333333	YWHAQ	0.015916	YWHAQ
9363.19	ISOC1	7.65693	CHP1	-6604	CLTCL1	8.19739e-05	CSRP1	1110	AXL	0.333333	SKI	0.0158965	SKI
9359.6	ACIN1	7.65604	ZNF33B	-6604	CHP1	8.19672e-05	TAT	1110	PSMD12	0.333333	AQP1	0.0158947	AQP1
9353.87	SMAD3	7.6554	LHX6	-6604	ZNF33B	8.19672e-05	PRDX6	1109	LGR4	0.333333	E2F7	0.0158897	E2F7
9353.53	ZNF703	7.65488	SAPCD2	-6604	LHX6	8.19672e-05	CXCL8	1109	TCN2	0.333333	ARID2	0.0158801	ARID2
9352.74	ARHGAP18	7.6548	RASSF1	-6604	SAPCD2	8.19672e-05	MNDA	1109	PHB	0.333333	ANXA7	0.0158705	ANXA7
9343.99	VCAN	7.65449	BDH2	-6604	RASSF1	8.19672e-05	CAPN2	1109	PTPRF	0.333333	EIF3E	0.0158626	EIF3E
9340.82	MMP7	7.65379	ADIPOQ	-6604	BDH2	8.19672e-05	HPRT1	1109	ETV1	0.333333	INPP1	0.0158598	INPP1
9338.01	HSD17B4	7.65368	MRPS34	-6604	ADIPOQ	8.19672e-05	EIF4A1	1108	SHROOM3	0.333333	RIOK2	0.015859	RIOK2
9335.28	HNMT	7.65229	LRRC59	-6604	MRPS34	8.19605e-05	RALB	1108	IFNAR1	0.333333	TCN2	0.0158573	TCN2
9331.97	TRIT1	7.65098	FAM83G	-6604	LRRC59	8.19538e-05	IRF6	1108	FBN2	0.333333	MGST1	0.015854	MGST1
9327.98	PDCD4	7.65018	ACIN1	-6604	FAM83G	8.19538e-05	ELP4	1107	BNC2	0.333333	EIF4G3	0.0158516	EIF4G3
9317.12	ENPP1	7.64995	IL5	-6604	ACIN1	8.19538e-05	KCNJ3	1107	NID2	0.333333	ABHD5	0.0158497	ABHD5
9311.65	SMAD7	7.64849	ADCK2	-6604	IL5	8.19538e-05	TSG101	1107	CDK6	0.333333	IK	0.0158495	IK
9307.76	NUP98	7.64849	GHRH	-6604	ADCK2	8.19538e-05	PTEN	1106	ABCC4	0.333333	COL12A1	0.0158475	COL12A1
9302.18	IL6ST	7.64776	MCAT	-6604	GHRH	8.19538e-05	PTPN3	1106	SLC4A8	0.333333	PRKAR1A	0.0158472	PRKAR1A
9299.32	DCK	7.64742	TMPRSS13	-6604	MCAT	8.19471e-05	TRIM24	1106	EGF	0.333333	CCDC86	0.0158442	CCDC86
9291.44	MBL2	7.6464	CLSTN1	-6604	TMPRSS13	8.19471e-05	HNMT	1106	TNFRSF1B	0.333333	CHMP2A	0.0158418	CHMP2A
9288.88	RHOBTB1	7.64445	NCR3	-6604	CLSTN1	8.19471e-05	ARPP21	1106	UTP20	0.333333	EMP3	0.0158385	EMP3
9284.17	CDC73	7.64339	PIEZO1	-6604	NCR3	8.19471e-05	EPHB2	1105	ENAH	0.333333	TSC22D2	0.0158376	TSC22D2
9282.25	EPHB2	7.64328	CLDN10	-6604	PIEZO1	8.19471e-05	F9	1105	TOB1	0.333333	HPRT1	0.0158365	HPRT1
9277.71	BLMH	7.64312	SIM2	-6604	CLDN10	8.19471e-05	MAPT	1105	HNF1B	0.333333	UBE2H	0.0158261	UBE2H
9277.33	GPA33	7.64302	HSD3B7	-6604	SIM2	8.19403e-05	PLP2	1105	ACSL1	0.333333	ITGB3	0.0158226	ITGB3
9274.71	DICER1	7.64278	PRKAR1B	-6604	HSD3B7	8.19403e-05	KIF2C	1105	ACSF2	0.333333	MPP7	0.0158225	MPP7
9273.26	ZMYND8	7.64246	CLDN4	-6604	PRKAR1B	8.19403e-05	REL	1104	VTI1A	0.333333	SESN3	0.0158209	SESN3
9272.89	TLR2	7.63791	MRPL49	-6604	CLDN4	8.19403e-05	CCNB1	1104	MED7	0.333333	GPAT3	0.0158171	GPAT3
9268.06	CSK	7.63706	ABHD13	-6604	MRPL49	8.19336e-05	DNAJB9	1104	C4BPA	0.333333	PRMT1	0.0158147	PRMT1
9267.38	SALL2	7.63687	DNTT	-6604	ABHD13	8.19336e-05	FOXM1	1104	IL10RA	0.333333	SRPK2	0.0158098	SRPK2
9265.53	MKNK1	7.63579	SMR3B	-6604	DNTT	8.19336e-05	PTPRF	1103	TXNRD1	0.333333	FLRT3	0.0158083	FLRT3
9264.06	DPF1	7.63233	TRAFD1	-6604	SMR3B	8.19336e-05	SLC41A2	1103	FMO4	0.333333	KCNJ3	0.0158073	KCNJ3
9263.99	VPS13D	7.63199	JMJD6	-6604	TRAFD1	8.19336e-05	AOAH	1103	HNMT	0.333333	INPP4B	0.0158055	INPP4B
9257.18	H2AFX	7.63183	RNF41	-6604	JMJD6	8.19336e-05	FGF1	1103	SPEN	0.333333	EIF4A1	0.0158046	EIF4A1
9257.07	ZMYND11	7.63172	KLK6	-6604	RNF41	8.19336e-05	ETV1	1102	UGCG	0.333333	FBLN5	0.0158043	FBLN5
9241.51	CCT5	7.6306	PAQR5	-6604	KLK6	8.19336e-05	CDK1	1102	PRDX6	0.333333	ANO2	0.0157992	ANO2
9238.36	MNDA	7.63037	MCF2L	-6604	PAQR5	8.19269e-05	ITGA4	1102	FOS	0.333333	CAPN1	0.0157929	CAPN1
9232.68	RB1	7.62894	MAGEA3	-6604	MCF2L	8.19269e-05	MMP7	1101	GPHN	0.333333	AIM1	0.0157886	AIM1
9226.71	EHBP1	7.62858	SNAI1	-6604	MAGEA3	8.19269e-05	PHLDA1	1101	SFRP1	0.333333	ZMYND8	0.0157777	ZMYND8
9224.62	PTBP3	7.62727	CLN3	-6604	SNAI1	8.19269e-05	EIF3E	1101	E2F2	0.333333	NECTIN3	0.0157767	NECTIN3
9216.49	DDB1	7.62614	USP18	-6604	CLN3	8.19202e-05	PSMA1	1101	EGR1	0.333333	PPP2R5E	0.0157683	PPP2R5E
9215.85	BMP15	7.62582	CDK20	-6604	USP18	8.19202e-05	TRIP13	1100	SYNPO2	0.333333	CA2	0.0157657	CA2
9202.62	DACT1	7.62575	LTB	-6604	CDK20	8.19202e-05	AHNAK	1100	PI4KB	0.333333	CHD7	0.0157607	CHD7
9197.04	EEF1A1	7.62499	TAF1D	-6604	LTB	8.19202e-05	IL7R	1100	SNAI2	0.333333	STXBP6	0.0157568	STXBP6
9193.12	CHODL	7.62427	VEGFB	-6604	TAF1D	8.19135e-05	EGF	1100	AKAP10	0.333333	LDHB	0.0157566	LDHB
9190.58	ACOX2	7.62405	CYP4F3	-6604	VEGFB	8.19135e-05	E2F2	1100	CSTA	0.333333	RCAN1	0.0157492	RCAN1
9176.93	C1D	7.6235	RNASEH2A	-6604	CYP4F3	8.19135e-05	IFNAR1	1100	RAB2A	0.333333	CD93	0.0157422	CD93
9175.59	FA2H	7.623	KDM4B	-6604	RNASEH2A	8.19135e-05	KYNU	1100	CDH17	0.333333	RIOK1	0.015732	RIOK1
9167.99	NRP1	7.62269	CCL20	-6604	KDM4B	8.19135e-05	SERPINB1	1100	ITGB2	0.333333	PLA2G4A	0.0157267	PLA2G4A
9158.27	KRAS	7.62142	HSD17B14	-6604	CCL20	8.19068e-05	EIF4G3	1100	TRAF6	0.333333	ADAMTS2	0.01572	ADAMTS2
9158.2	MIS18BP1	7.61796	ZNF224	-6604	HSD17B14	8.19068e-05	MED14	1100	MAPK8	0.333333	TRIB2	0.0157195	TRIB2
9156.93	CXCL9	7.61664	SLC7A13	-6604	ZNF224	8.19068e-05	GSK3B	1099	RAI2	0.333333	PFKM	0.0157188	PFKM
9155.38	LRRFIP1	7.61602	SLC16A10	-6604	SLC7A13	8.19068e-05	EFNB2	1099	QSOX1	0.333333	ST6GALNAC5	0.0157174	ST6GALNAC5
9155.27	SDC4	7.61572	SPZ1	-6604	SLC16A10	8.19068e-05	SELL	1099	PDLIM1	0.333333	RPS6KA1	0.0157163	RPS6KA1
9151.99	UNC50	7.61504	RPRD2	-6604	SPZ1	8.18934e-05	F2R	1099	AQP9	0.333333	ACTC1	0.0157152	ACTC1
9151.95	MED7	7.61146	MRPL28	-6604	RPRD2	8.18934e-05	SRPX	1099	TRAF3	0.333333	CCDC88A	0.0157127	CCDC88A
9143.18	IGF2BP3	7.60927	CHAC2	-6604	MRPL28	8.18934e-05	BRCA1	1098	UNG	0.333333	PTPRF	0.0157095	PTPRF
9141.92	TNPO1	7.60912	ASB9	-6604	CHAC2	8.18867e-05	AIM1	1098	HSD17B2	0.333333	STAT5A	0.0157009	STAT5A
9140.13	FHL2	7.6087	C14orf1	-6604	ASB9	8.18867e-05	TNFRSF1B	1097	C1D	0.333333	ERH	0.0156985	ERH
9134.13	CYP2A7	7.60643	MEN1	-6604	C14orf1	8.188e-05	DAAM2	1097	KCNJ3	0.333333	BAAT	0.0156985	BAAT
9133.38	CRYZ	7.60521	DEFB103A	-6604	MEN1	8.188e-05	ZMYND8	1097	CEBPG	0.333333	NEO1	0.0156976	NEO1
9133.37	HSD17B10	7.6033	SHH	-6604	DEFB103A	8.188e-05	ADAM10	1096	ALMS1	0.333333	TBX3	0.0156943	TBX3
9121.46	ALMS1	7.60181	SFXN2	-6604	SHH	8.188e-05	DNMT1	1096	RALB	0.333333	PRDX6	0.0156923	PRDX6
9121.46	CCNG2	7.60082	SLC8A2	-6604	SFXN2	8.188e-05	ZFAND5	1096	PTPN3	0.333333	ACSL1	0.0156919	ACSL1
9119.69	MEF2A	7.60072	CCRL2	-6604	SLC8A2	8.18733e-05	NPC2	1096	ADAM10	0.333333	SRPX	0.01569	SRPX
9119.67	TERF2	7.6007	COPS7A	-6604	CCRL2	8.18733e-05	ERH	1096	MCM5	0.333333	SLC27A2	0.0156865	SLC27A2
9109.9	CANX	7.60053	RAVER2	-6604	COPS7A	8.18733e-05	TUBB2A	1095	NDFIP2	0.333333	KCNS3	0.0156851	KCNS3
9108.09	TNFRSF1B	7.59989	LRRN3	-6604	RAVER2	8.18733e-05	PAPOLG	1095	HRAS	0.333333	ATP1A1	0.0156809	ATP1A1
9087.92	SEMA3C	7.59733	OGG1	-6604	LRRN3	8.18666e-05	CD81	1095	BTK	0.333333	DLD	0.0156763	DLD
9082.79	NECTIN3	7.5962	CHD5	-6604	OGG1	8.18666e-05	TSPO	1094	CHMP2A	0.333333	CDK2	0.0156749	CDK2
9082.56	CXCR5	7.59394	GPR37L1	-6604	CHD5	8.18666e-05	FLRT3	1094	TBC1D8	0.333333	XPO5	0.015661	XPO5
9081.33	PTEN	7.59392	FXYD5	-6604	GPR37L1	8.18666e-05	IK	1094	SEPHS1	0.333333	AQP9	0.0156567	AQP9
9081.13	RB1CC1	7.59374	DEPDC7	-6604	FXYD5	8.18666e-05	RIT1	1094	VWF	0.333333	FES	0.0156564	FES
9078.35	TOB1	7.59373	SLC22A5	-6604	DEPDC7	8.18666e-05	STK4	1093	CD83	0.333333	MANF	0.015654	MANF
9051.44	TEK	7.59239	TFR2	-6604	SLC22A5	8.18666e-05	NR2F2	1093	HGF	0.333333	MRPL22	0.0156528	MRPL22
9049.88	IL1R1	7.59198	SIRT5	-6604	TFR2	8.18599e-05	EGR3	1093	TRIP13	0.333333	EPHA2	0.0156457	EPHA2
9046.02	INTU	7.59082	CASP5	-6604	SIRT5	8.18599e-05	FBN2	1093	KYNU	0.333333	PHB	0.0156331	PHB
9045.59	FRAS1	7.58967	IL11RA	-6604	CASP5	8.18532e-05	GLRX	1093	MKNK1	0.333333	COMMD1	0.0156254	COMMD1
9037.23	TSC22D1	7.58865	FADS3	-6604	IL11RA	8.18532e-05	FAM110B	1093	LAMC2	0.333333	GBP2	0.0156225	GBP2
9035.61	TRAF3	7.58769	KIAA0319L	-6604	FADS3	8.18532e-05	HNRNPU	1093	NFATC1	0.333333	PSD3	0.0156197	PSD3
9034.35	AIM1	7.58718	NPC1	-6604	KIAA0319L	8.18465e-05	SMOX	1092	MAOA	0.333333	RHOQ	0.0156194	RHOQ
9031.7	NFATC1	7.58699	NEK9	-6604	NPC1	8.18465e-05	HOXB13	1091	AXIN1	0.333333	HAT1	0.0156178	HAT1
9030.2	PHB	7.58672	SLC2A9	-6604	NEK9	8.18465e-05	TRIT1	1091	NDUFS1	0.333333	LIMA1	0.0156048	LIMA1
9028.57	KDM2A	7.58532	METTL3	-6604	SLC2A9	8.18465e-05	USP10	1090	KDM2A	0.333333	GSK3B	0.0156033	GSK3B
9024.91	PCSK5	7.58339	ACSL5	-6604	METTL3	8.18398e-05	THY1	1090	SLTM	0.333333	CXCL8	0.0155999	CXCL8
9017.17	CPED1	7.58319	SLC25A19	-6604	ACSL5	8.18398e-05	SRPRB	1090	RAC1	0.333333	CUL3	0.0155991	CUL3
9014.88	TLE1	7.58297	MCRS1	-6604	SLC25A19	8.18398e-05	MKNK1	1089	PRICKLE1	0.333333	SLCO2B1	0.015594	SLCO2B1
9014.22	SEPHS1	7.5828	SLC48A1	-6604	MCRS1	8.18398e-05	AQP1	1089	MANF	0.333333	BTRC	0.0155936	BTRC
9007.8	MAP3K11	7.58226	CYB5R1	-6604	SLC48A1	8.18398e-05	SPEN	1089	MED14	0.333333	OSR2	0.015592	OSR2
8997.31	BACE2	7.58137	STXBP2	-6604	CYB5R1	8.18331e-05	ISOC1	1088	F2R	0.333333	PTPN11	0.0155867	PTPN11
8994.91	FAAH	7.58005	DNASE1L1	-6604	STXBP2	8.18331e-05	IL2RG	1087	EIF4G3	0.333333	SLC40A1	0.0155856	SLC40A1
8992.16	PTPN14	7.57904	CES2	-6604	DNASE1L1	8.18264e-05	XDH	1087	ZFAND5	0.333333	TXNRD1	0.0155832	TXNRD1
8990.82	ADAM10	7.57835	MNX1	-6604	CES2	8.18264e-05	UTP20	1087	STIP1	0.333333	FCER1G	0.0155817	FCER1G
8990.12	CEBPB	7.57751	ATP23	-6604	MNX1	8.18264e-05	HSD17B2	1086	TMTC2	0.333333	ATP1B1	0.015572	ATP1B1
8990.06	TMEM59	7.57553	B3GAT1	-6604	ATP23	8.18264e-05	PDE4B	1086	TET2	0.333333	TANK	0.0155705	TANK
8990.04	IFNAR1	7.57468	CDC34	-6604	B3GAT1	8.18264e-05	RPA2	1086	CD81	0.333333	RBM26	0.0155704	RBM26
8986.28	TOR1B	7.57356	CD7	-6604	CDC34	8.18197e-05	FGL1	1085	BACE2	0.333333	TRIT1	0.015569	TRIT1
8978.21	HMBS	7.57295	TIRAP	-6604	CD7	8.18197e-05	BCAS3	1085	MSX2	0.333333	PDLIM1	0.0155684	PDLIM1
8977.72	IGFBP4	7.5729	ADCY10	-6604	TIRAP	8.1813e-05	AKAP1	1085	SERPINB1	0.333333	ITGA10	0.0155582	ITGA10
8969.44	HYOU1	7.57151	ZNF516	-6604	ADCY10	8.1813e-05	CADPS2	1085	CTCF	0.333333	USP10	0.0155525	USP10
8969.14	IWS1	7.57137	GPI	-6604	ZNF516	8.1813e-05	SLC27A2	1085	ACTC1	0.333333	ORC2	0.0155422	ORC2
8966.2	PIK3C2A	7.57061	GSTM5	-6604	GPI	8.18063e-05	ADAMTS2	1085	IGFBP4	0.333333	CLEC2D	0.0155399	CLEC2D
8961.92	ZNF532	7.57022	METTL21A	-6604	GSTM5	8.18063e-05	NECTIN3	1083	GPAM	0.333333	SRGAP1	0.0155321	SRGAP1
8958.06	DUSP4	7.56956	LHFPL5	-6604	METTL21A	8.18063e-05	CEBPG	1083	FRAS1	0.333333	RRM1	0.015526	RRM1
8955.42	UBL3	7.56879	CFD	-6604	LHFPL5	8.17996e-05	MTSS1	1083	ARGLU1	0.333333	PPP6R3	0.0155259	PPP6R3
8953.5	ADA	7.56618	KRT19	-6604	CFD	8.17996e-05	ATP1B1	1083	LPIN1	0.333333	ATP10D	0.0155192	ATP10D
8943.85	CBX5	7.56563	CXXC5	-6604	KRT19	8.17996e-05	LAMC2	1083	MMP7	0.333333	ERBIN	0.0155085	ERBIN
8940.47	RACGAP1	7.56459	AMH	-6604	CXXC5	8.17996e-05	AKAP12	1083	TUBA4A	0.333333	NDUFS1	0.0155081	NDUFS1
8939.34	CD14	7.56428	TRH	-6604	AMH	8.17996e-05	ORC2	1083	GNAI3	0.333333	SELL	0.0155065	SELL
8936.64	TJP1	7.56366	SPHKAP	-6604	TRH	8.17929e-05	CLEC2D	1083	PSMB8	0.333333	ISOC1	0.0155063	ISOC1
8933.61	FZD2	7.5607	AGR2	-6604	SPHKAP	8.17929e-05	CDH17	1083	BUB1B	0.333333	LAMC2	0.0155034	LAMC2
8933.29	KMT2A	7.55883	TUBB2B	-6604	AGR2	8.17929e-05	AGTR1	1082	ISOC1	0.333333	F9	0.0155015	F9
8929.09	CAP1	7.55879	HMOX2	-6604	TUBB2B	8.17929e-05	AXL	1082	ATP2A2	0.333333	ALK	0.0155014	ALK
8927.37	SIPA1L2	7.55638	CRYAA	-6604	HMOX2	8.17862e-05	CTCF	1082	H2AFX	0.333333	CSTA	0.0154972	CSTA
8926.67	SLC7A5	7.55618	PATZ1	-6604	CRYAA	8.17862e-05	ACTC1	1082	INSR	0.333333	EXOC2	0.015496	EXOC2
8924.7	PRICKLE1	7.5546	HOXA1	-6604	PATZ1	8.17795e-05	HRAS	1081	FERMT2	0.333333	ITM2B	0.015495	ITM2B
8924.33	GPR68	7.55041	ZNF112	-6604	HOXA1	8.17795e-05	CD63	1081	IRF6	0.333333	PLCG2	0.0154945	PLCG2
8923.29	SKP2	7.55021	CASD1	-6604	ZNF112	8.17795e-05	PANX1	1081	CD63	0.333333	EGR3	0.0154931	EGR3
8919.42	ERH	7.55007	TMEM14A	-6604	CASD1	8.17795e-05	NEO1	1081	HSD17B4	0.333333	AKAP1	0.0154875	AKAP1
8919.38	RMI1	7.55006	DPF2	-6604	TMEM14A	8.17795e-05	CYP1B1	1081	CAT	0.333333	ETV5	0.0154836	ETV5
8918.66	PLG	7.55006	EXTL1	-6604	DPF2	8.17728e-05	TNFRSF14	1080	CCDC86	0.333333	FOCAD	0.015474	FOCAD
8911.69	TXNRD1	7.54826	ADAMTS6	-6604	EXTL1	8.17728e-05	NCOA4	1080	DNAJB9	0.333333	MYOM1	0.015465	MYOM1
8911.17	CD70	7.54794	PPM1D	-6604	ADAMTS6	8.17728e-05	CXCR5	1080	RIT1	0.333333	NFATC1	0.0154612	NFATC1
8906.29	IL7R	7.54531	CABIN1	-6604	PPM1D	8.17728e-05	PLXDC1	1080	USP10	0.333333	CGNL1	0.0154612	CGNL1
8905.4	EEF1E1	7.54462	APOBEC3B	-6604	CABIN1	8.17728e-05	PPP2R5E	1079	SH3BGRL	0.333333	PLP1	0.0154609	PLP1
8903.78	GATA1	7.54362	LSM7	-6604	APOBEC3B	8.17661e-05	CLSTN1	1079	FAM110B	0.333333	STK4	0.0154513	STK4
8902.62	CDC27	7.54319	SCYL2	-6604	LSM7	8.17661e-05	ADARB2	1079	SLC27A2	0.333333	GATAD1	0.0154503	GATAD1
8902.56	MYO10	7.54271	S100A1	-6604	SCYL2	8.17661e-05	FBLN5	1079	NEO1	0.333333	PSMD12	0.0154467	PSMD12
8899.53	SENP7	7.54208	MAST4	-6604	S100A1	8.17595e-05	CHODL	1079	CYP17A1	0.333333	AGO2	0.0154408	AGO2
8893.45	STK4	7.54192	RBM34	-6604	MAST4	8.17595e-05	LGALS3	1078	TSPO	0.333333	E2F2	0.0154369	E2F2
8892.23	CLU	7.5418	LAD1	-6604	RBM34	8.17528e-05	SDC4	1078	PPP2R5E	0.333333	ZNF608	0.0154309	ZNF608
8885.57	RAB25	7.54172	IL36RN	-6604	LAD1	8.17528e-05	BTAF1	1078	CEBPB	0.333333	CEP350	0.0154252	CEP350
8881.02	CD226	7.5415	P4HA2	-6604	IL36RN	8.17461e-05	FABP5	1077	SCHIP1	0.333333	CYTIP	0.0154191	CYTIP
8877.06	NEURL1	7.54118	ATP8B1	-6604	P4HA2	8.17461e-05	HSD17B4	1077	S100A11	0.333333	SORBS1	0.0154171	SORBS1
8875	TYK2	7.54114	NEK8	-6604	ATP8B1	8.17394e-05	MRPL22	1077	EPCAM	0.333333	CDC42EP3	0.0154153	CDC42EP3
8874.22	F2R	7.54014	MYL1	-6604	NEK8	8.17394e-05	NFATC1	1077	PHLDA1	0.333333	KIF23	0.0154147	KIF23
8866.88	ADORA2B	7.54013	PRPF40B	-6604	MYL1	8.17394e-05	MGST1	1077	AHNAK	0.333333	RELA	0.0154134	RELA
8866.59	FERMT2	7.53736	GUSB	-6604	PRPF40B	8.17394e-05	ABHD5	1077	NECTIN3	0.333333	FABP5	0.0154118	FABP5
8862.95	FABP5	7.53718	FXR2	-6604	GUSB	8.17394e-05	KPNA2	1076	INPP1	0.333333	SOX5	0.0154095	SOX5
8860.21	RNF150	7.53626	GRAMD1C	-6604	FXR2	8.17327e-05	IGFBP4	1076	HOXB13	0.333333	PTTG1	0.0154054	PTTG1
8853.96	SCAP	7.53356	MAZ	-6604	GRAMD1C	8.17327e-05	RBM25	1076	LGALS1	0.333333	LAMA3	0.0154038	LAMA3
8843.57	RPL17	7.5335	LCAT	-6604	MAZ	8.17327e-05	NCL	1076	PABPC1	0.333333	SRPRB	0.0154015	SRPRB
8842.82	SDC2	7.53238	ZNF277	-6604	LCAT	8.17261e-05	MLF2	1076	PXN	0.333333	DMD	0.0154003	DMD
8842.52	MAD1L1	7.53233	SOX3	-6604	ZNF277	8.17261e-05	PLA2G4A	1075	SPINT2	0.333333	BCL2	0.0153913	BCL2
8840.39	GSC	7.53203	SLC35E4	-6604	SOX3	8.17261e-05	AR	1075	BGN	0.333333	GEM	0.015391	GEM
8825	SH3BGRL	7.53158	ASIC3	-6604	SLC35E4	8.17194e-05	GPR135	1074	ELP4	0.333333	SLC2A2	0.0153871	SLC2A2
8823.74	CSRP1	7.53051	OS9	-6604	ASIC3	8.17194e-05	TFAP4	1074	PLP2	0.333333	CXCR5	0.0153837	CXCR5
8822.16	CDK1	7.53033	WNT11	-6604	OS9	8.17194e-05	AXIN1	1074	PRKCD	0.333333	PSMA1	0.0153745	PSMA1
8822.1	TNS2	7.52952	SLC52A2	-6604	WNT11	8.17194e-05	RUNX3	1073	GLRX	0.333333	POLD3	0.0153732	POLD3
8812.4	SLC27A2	7.52834	SLC16A12	-6604	SLC52A2	8.17194e-05	SKI	1073	COL3A1	0.333333	HEXB	0.0153714	HEXB
8810.83	KCNJ2	7.52752	KLHL4	-6604	SLC16A12	8.17194e-05	VOPP1	1072	EGR3	0.333333	FZD2	0.015371	FZD2
8810.23	MET	7.5242	CXCL5	-6604	KLHL4	8.17127e-05	POLD3	1072	CLEC2D	0.333333	RYR1	0.0153673	RYR1
8807.41	EPHX2	7.52206	SNTA1	-6604	CXCL5	8.17127e-05	SLCO2B1	1072	GEM	0.333333	GPR135	0.0153622	GPR135
8806.86	CCNB1	7.52156	NR1I3	-6604	SNTA1	8.17127e-05	MAOA	1072	SMURF1	0.333333	UNG	0.0153611	UNG
8803.14	IDI1	7.52079	PTPA	-6604	NR1I3	8.17127e-05	HSPA9	1072	DDB1	0.333333	CHRM3	0.0153608	CHRM3
8799.43	PLOD3	7.52	HOXB1	-6604	PTPA	8.17127e-05	NDUFS1	1071	SRPX	0.333333	TSG101	0.0153582	TSG101
8792.21	SLC1A3	7.51953	MRPS6	-6604	HOXB1	8.17127e-05	LAMA3	1071	ZMYND8	0.333333	ZNF532	0.0153569	ZNF532
8791.84	GLRX	7.51903	HCFC1	-6604	MRPS6	8.1706e-05	GFPT2	1071	PAPOLG	0.333333	SECISBP2L	0.0153539	SECISBP2L
8791.05	SLC2A9	7.51692	NUP214	-6604	HCFC1	8.1706e-05	PLIN3	1071	ATP1B1	0.333333	VWF	0.0153496	VWF
8789.16	RAB2A	7.51601	BCL2L13	-6604	NUP214	8.1706e-05	IGSF1	1071	ALK	0.333333	MNDA	0.0153494	MNDA
8788.18	NID2	7.51535	PIK3R2	-6604	BCL2L13	8.1706e-05	ST6GALNAC5	1071	TLR2	0.333333	PLP2	0.015349	PLP2
8786.47	CSNK2B	7.51452	JADE2	-6604	PIK3R2	8.1706e-05	TRAF3	1071	IRAK1	0.333333	DERA	0.0153465	DERA
8780.64	GPHN	7.51384	AQP5	-6604	JADE2	8.1706e-05	INPP4B	1070	THY1	0.333333	SLC6A12	0.0153463	SLC6A12
8778.27	EDEM1	7.51383	SST	-6604	AQP5	8.1706e-05	ATR	1070	KPNA2	0.333333	SIRPA	0.0153427	SIRPA
8767.37	EMP2	7.51268	IL24	-6604	SST	8.16993e-05	ZNF532	1069	AKAP12	0.333333	MMP7	0.0153307	MMP7
8767.34	AIMP1	7.51202	CPN1	-6604	IL24	8.16993e-05	ARL15	1069	PRKCB	0.333333	DOCK4	0.01533	DOCK4
8766.54	PDCD6IP	7.51112	GH2	-6604	CPN1	8.16993e-05	PSMD12	1068	CDC5L	0.333333	TAT	0.0153286	TAT
8764.99	ITGB8	7.50988	DLG5	-6604	GH2	8.16927e-05	ALK	1067	IK	0.333333	PPP1R3B	0.0153241	PPP1R3B
8762.72	UPP1	7.50982	RILPL1	-6604	DLG5	8.16927e-05	LGALS1	1067	TFAP4	0.333333	GLRX	0.0153237	GLRX
8761.94	SLC9A9	7.50969	HTR3A	-6604	RILPL1	8.16927e-05	CDC42BPA	1065	NCOA4	0.333333	MKNK1	0.0153236	MKNK1
8761.81	FOLH1	7.50896	ULK4	-6604	HTR3A	8.1686e-05	SMO	1065	ENO1	0.333333	DDB2	0.0153232	DDB2
8757.59	PRKCD	7.50773	CALCA	-6604	ULK4	8.1686e-05	FZD2	1065	CSK	0.333333	IL7R	0.0153167	IL7R
8748.29	COX8A	7.50715	BMP8B	-6604	CALCA	8.1686e-05	CRTAP	1065	ATP5A1	0.333333	SFN	0.0153117	SFN
8747.79	FSHB	7.50656	ELK1	-6604	BMP8B	8.1686e-05	GEM	1064	FLRT3	0.333333	SMURF1	0.015309	SMURF1
8747.36	PRMT8	7.50598	DMRTA1	-6604	ELK1	8.16793e-05	HYOU1	1064	INPP4B	0.333333	ACSF2	0.0153021	ACSF2
8746.62	FGR	7.50585	MAGEH1	-6604	DMRTA1	8.16793e-05	EMP2	1064	HEXB	0.333333	RGS2	0.0152998	RGS2
8737.65	FAM171A1	7.50116	KLK4	-6604	MAGEH1	8.16793e-05	RSPO3	1063	CCDC50	0.333333	NEDD4	0.0152958	NEDD4
8732.7	SLTM	7.50055	SRGAP2	-6604	KLK4	8.16793e-05	SMURF1	1063	AGTR1	0.333333	SMOX	0.0152952	SMOX
8731.77	TNS3	7.49918	GUK1	-6604	SRGAP2	8.16793e-05	SMAD3	1063	SKI	0.333333	SCO1	0.0152899	SCO1
8729.7	BCAP31	7.49833	ABO	-6604	GUK1	8.16793e-05	ITGB3	1063	COL12A1	0.333333	CEBPG	0.015287	CEBPG
8729.62	AQP9	7.49811	OTUB2	-6604	ABO	8.16727e-05	CUL5	1063	YAP1	0.333333	SLC4A8	0.0152854	SLC4A8
8726.88	CNN1	7.49808	ALPI	-6604	OTUB2	8.16727e-05	TUBA4A	1062	SRPRB	0.333333	HNRNPU	0.0152798	HNRNPU
8724.9	SYNPO2	7.49705	NTRK1	-6604	ALPI	8.16727e-05	CD226	1062	AKAP1	0.333333	GCLC	0.015274	GCLC
8721.38	PPP6C	7.49692	PILRA	-6604	NTRK1	8.16727e-05	SIRPA	1062	MTSS1	0.333333	NME1	0.0152684	NME1
8720.7	PLD1	7.49662	DNM2	-6604	PILRA	8.16727e-05	KCNS3	1061	RBM25	0.333333	CDKL5	0.0152676	CDKL5
8718.12	PML	7.49556	GARNL3	-6604	DNM2	8.16727e-05	NAV3	1061	CDC42BPA	0.333333	NAB2	0.015264	NAB2
8716.72	HDAC3	7.49406	ZNF503	-6604	GARNL3	8.16727e-05	GPAT3	1061	FZD2	0.333333	THY1	0.0152636	THY1
8713.72	RHOBTB2	7.49382	DUOXA1	-6604	ZNF503	8.16727e-05	TOP2A	1061	NEDD4	0.333333	CDH17	0.0152634	CDH17
8713.02	FGF1	7.49355	IER5L	-6604	DUOXA1	8.1666e-05	DAPK2	1061	BMPR2	0.333333	DST	0.0152593	DST
8712.35	ANXA7	7.49353	SLC2A4	-6604	IER5L	8.1666e-05	DUSP5	1061	RPS6KB1	0.333333	BMPR2	0.0152571	BMPR2
8711.95	GSTM5	7.49221	LTK	-6604	SLC2A4	8.1666e-05	DERA	1060	AQP1	0.333333	HDAC9	0.0152562	HDAC9
8711.71	DDX6	7.49213	SH2D3C	-6604	LTK	8.1666e-05	RIOK2	1060	FGR	0.333333	CPED1	0.0152558	CPED1
8705.91	CHN2	7.49205	GEMIN4	-6604	SH2D3C	8.1666e-05	DPM1	1060	CORO1C	0.333333	PRDM2	0.015254	PRDM2
8704.42	NEO1	7.49176	GPX4	-6604	GEMIN4	8.1666e-05	GSE1	1060	RAP1A	0.333333	HMGN3	0.0152512	HMGN3
8699.68	RTN4	7.49166	BAG3	-6604	GPX4	8.16593e-05	RYR1	1060	VCL	0.333333	MAOA	0.0152479	MAOA
8698.88	ARHGDIB	7.49162	ARMC9	-6604	BAG3	8.16593e-05	TLR2	1059	TRIT1	0.333333	CITED2	0.0152439	CITED2
8696.7	FGF7	7.49155	IL23R	-6604	ARMC9	8.16593e-05	UBE2H	1059	DPM1	0.333333	CD226	0.0152281	CD226
8693.91	ACTC1	7.49139	ANKRD37	-6604	IL23R	8.16593e-05	HEXB	1059	ELK3	0.333333	NPC2	0.0152214	NPC2
8692.71	ARPC1B	7.49135	CNPY3	-6604	ANKRD37	8.16593e-05	PLG	1059	ORC5	0.333333	CAPNS1	0.0152184	CAPNS1
8691.77	DYM	7.49058	LGR6	-6604	CNPY3	8.16526e-05	PGF	1058	FGL1	0.333333	MMRN1	0.0152179	MMRN1
8689.35	CNN3	7.48885	ADAM8	-6604	LGR6	8.16526e-05	WNT4	1058	FHL2	0.333333	HDC	0.0152179	HDC
8687.55	ADAMTS2	7.48805	CDKN2C	-6604	ADAM8	8.16526e-05	RIOK1	1058	STAT5B	0.333333	CSRP2	0.0152152	CSRP2
8684.31	CAT	7.48776	OLFML1	-6604	CDKN2C	8.16526e-05	RCAN1	1057	PDE4B	0.333333	NCOA4	0.0152119	NCOA4
8684.24	NELL2	7.48681	MICALL2	-6604	OLFML1	8.16526e-05	ELK3	1057	BTAF1	0.333333	TM6SF1	0.0152067	TM6SF1
8679.08	NEDD4	7.48643	REG3A	-6604	MICALL2	8.1646e-05	CYB5A	1057	LIMA1	0.333333	ATP2A2	0.0152052	ATP2A2
8677.5	RHOG	7.48633	PRKCG	-6604	REG3A	8.1646e-05	C4BPA	1057	CYP11A1	0.333333	ENO2	0.0151877	ENO2
8673.97	DPM1	7.48491	LRP5	-6604	PRKCG	8.1646e-05	VWF	1057	SNRPE	0.333333	RAP1A	0.0151846	RAP1A
8671.5	PNOC	7.48475	NFATC4	-6604	LRP5	8.1646e-05	PRIM1	1056	CUL5	0.333333	RPS6KB1	0.0151798	RPS6KB1
8670.37	CHD9	7.48454	MLH3	-6604	NFATC4	8.16393e-05	ARL2BP	1056	SORBS1	0.333333	PTCH1	0.0151682	PTCH1
8669.59	RHOB	7.48401	SLC38A1	-6604	MLH3	8.16393e-05	CEP350	1055	DYM	0.333333	TMEM117	0.0151679	TMEM117
8662.21	HGF	7.48364	DCLRE1B	-6604	SLC38A1	8.16393e-05	CPED1	1055	AIM1	0.333333	PCDH10	0.0151617	PCDH10
8659.1	ALK	7.48121	MLLT11	-6604	DCLRE1B	8.16393e-05	FKBP5	1055	SMOX	0.333333	PHC2	0.0151582	PHC2
8658.25	CPOX	7.47869	ARX	-6604	MLLT11	8.16393e-05	NEDD4	1055	NDUFA9	0.333333	ITGA4	0.0151539	ITGA4
8658.06	HSPB2	7.47651	AVEN	-6604	ARX	8.16393e-05	TSC22D2	1055	HNRNPL	0.333333	TTC3	0.0151481	TTC3
8657.58	EIF4A1	7.47424	TP73	-6604	AVEN	8.16327e-05	NF2	1054	ARPP21	0.333333	NF2	0.0151385	NF2
8654.99	INSIG1	7.47397	GNG3	-6604	TP73	8.16327e-05	RTN4	1054	CYP1B1	0.333333	ADRA1A	0.0151347	ADRA1A
8650.14	NUDT1	7.47301	TH	-6604	GNG3	8.16327e-05	ITM2B	1054	TNFRSF14	0.333333	BRCA1	0.0151293	BRCA1
8648.63	RAB32	7.47255	HECTD4	-6604	TH	8.16327e-05	RHOQ	1054	SDC4	0.333333	ITGA9	0.0151275	ITGA9
8643.33	USP10	7.46986	BRINP1	-6604	HECTD4	8.16327e-05	ATP2A2	1054	ABHD5	0.333333	ENPEP	0.0151239	ENPEP
8640.91	OGFRL1	7.4687	BCKDHA	-6604	BRINP1	8.1626e-05	FAM171A1	1054	RUNX3	0.333333	AXIN1	0.0151156	AXIN1
8636.84	TLR3	7.4686	NR0B2	-6604	BCKDHA	8.1626e-05	CDC73	1054	CYB5A	0.333333	NT5DC1	0.0151103	NT5DC1
8636.37	HSPA9	7.46774	EPPK1	-6604	NR0B2	8.1626e-05	NAB2	1054	RHOQ	0.333333	GRIK2	0.0151083	GRIK2
8632.97	LTBP2	7.46755	ZNF384	-6604	EPPK1	8.1626e-05	BTRC	1054	RGS5	0.333333	PUM2	0.0151012	PUM2
8631.52	ATG9A	7.46455	HOXB5	-6604	ZNF384	8.16193e-05	MPP7	1053	DAAM2	0.333333	SOSTDC1	0.0150984	SOSTDC1
8627.52	ENC1	7.46332	BBC3	-6604	HOXB5	8.16193e-05	RERG	1053	EMP2	0.333333	MST1R	0.0150961	MST1R
8626.27	LIFR	7.46198	TCTN1	-6604	BBC3	8.16127e-05	LTBR	1053	KCNS3	0.333333	PRMT8	0.0150932	PRMT8
8621.91	FZD1	7.46153	RHOD	-6604	TCTN1	8.16127e-05	HHIP	1053	MAP2K6	0.333333	IRF6	0.0150846	IRF6
8612.07	TIMP1	7.45982	TRMT1	-6604	RHOD	8.16127e-05	GRK3	1053	CXCL9	0.333333	EVA1C	0.0150827	EVA1C
8606.5	TRIM27	7.4589	TMEM208	-6604	TRMT1	8.16127e-05	PRKAR1A	1051	NPC2	0.333333	SH3BP5	0.0150788	SH3BP5
8606.09	WIF1	7.45817	KLF8	-6604	TMEM208	8.16127e-05	ARHGDIB	1051	CADPS2	0.333333	MEOX1	0.0150776	MEOX1
8605.8	RALB	7.4568	FLII	-6604	KLF8	8.16127e-05	SHC1	1051	POLD3	0.333333	HSD17B2	0.0150753	HSD17B2
8604.32	PPP1R12A	7.45674	TLE2	-6604	FLII	8.16127e-05	CCT6A	1051	PGF	0.333333	AOAH	0.015074	AOAH
8589.65	MMP15	7.45545	ZC3H10	-6604	TLE2	8.1606e-05	ARPC1B	1051	NF2	0.333333	FGF2	0.0150739	FGF2
8588.01	PARPBP	7.45484	KAZN	-6604	ZC3H10	8.1606e-05	CYP17A1	1050	RNF150	0.333333	MDM1	0.0150615	MDM1
8587.22	CD83	7.45347	EBI3	-6604	KAZN	8.1606e-05	SOX5	1050	DDX6	0.333333	EMP2	0.0150569	EMP2
8585.3	SELL	7.45324	SEC11C	-6604	EBI3	8.1606e-05	XPO5	1049	PLXDC1	0.333333	CORO1C	0.0150536	CORO1C
8581.7	EPHB6	7.45323	SORT1	-6604	SEC11C	8.1606e-05	PTPN11	1049	IGSF1	0.333333	FAM171A1	0.0150525	FAM171A1
8580.22	TAB1	7.45126	CKB	-6604	SORT1	8.15993e-05	EDEM1	1049	EIF4A3	0.333333	ARID1B	0.0150508	ARID1B
8577.14	TOM1L1	7.45026	MVP	-6604	CKB	8.15993e-05	RCAN2	1049	SMC2	0.333333	KCNH8	0.0150498	KCNH8
8574.44	CEBPG	7.44999	BSCL2	-6604	MVP	8.15993e-05	GNAI3	1048	TMTC1	0.333333	TTLL11	0.0150491	TTLL11
8573.3	ATP5A1	7.44848	TERF1	-6604	BSCL2	8.15993e-05	RPA1	1048	FABP5	0.333333	PENK	0.0150476	PENK
8570.3	PTPN3	7.44749	PLEKHG1	-6604	TERF1	8.15927e-05	LIMA1	1048	BTRC	0.333333	RTN4	0.0150475	RTN4
8560.95	PLA2G4A	7.4474	LDAH	-6604	PLEKHG1	8.1586e-05	SELP	1048	DMD	0.333333	CDC73	0.0150469	CDC73
8558.76	BAX	7.44628	ANXA9	-6604	LDAH	8.1586e-05	ENPEP	1048	COL6A2	0.333333	CTCF	0.0150383	CTCF
8556.54	STIP1	7.44514	OPHN1	-6604	ANXA9	8.1586e-05	E2F7	1047	ZNF532	0.333333	ABI3BP	0.0150363	ABI3BP
8554.65	LGALS1	7.44488	GH1	-6604	OPHN1	8.1586e-05	CAT	1047	RYR1	0.333333	TFAP4	0.0150331	TFAP4
8550.06	FGFR4	7.44471	NME4	-6604	GH1	8.1586e-05	IL2RB	1047	ERBIN	0.333333	AKT1	0.0150319	AKT1
8549.13	APLP1	7.44193	CARS2	-6604	NME4	8.15794e-05	ALPP	1047	HSD17B10	0.333333	FGL1	0.0150204	FGL1
8539.16	TET2	7.44168	FANCL	-6604	CARS2	8.15794e-05	BDH1	1047	GART	0.333333	DAAM2	0.0150075	DAAM2
8534.12	SRPX	7.4413	AKT1S1	-6604	FANCL	8.15794e-05	IRAK1	1046	SLCO2B1	0.333333	PRDM16	0.0150001	PRDM16
8533.99	CADPS2	7.44108	ALKBH1	-6604	AKT1S1	8.15794e-05	CHRM3	1046	FKBP5	0.333333	IGSF1	0.0149988	IGSF1
8533.04	EIF4G3	7.44103	LACTB2	-6604	ALKBH1	8.15794e-05	PRKCD	1046	NCOR1	0.333333	TRAF3	0.014997	TRAF3
8531.62	IFIT3	7.44027	NRL	-6604	LACTB2	8.15794e-05	SORBS1	1045	PRKAR1A	0.333333	IGF1	0.014996	IGF1
8521.21	KITLG	7.43774	DPF1	-6604	NRL	8.15727e-05	PDXK	1045	PML	0.333333	PDXK	0.0149944	PDXK
8518.24	FAH	7.43749	SALL2	-6604	DPF1	8.15727e-05	SIAH2	1045	BLM	0.333333	MAP3K10	0.0149886	MAP3K10
8514.65	WNT1	7.43727	TANC1	-6604	SALL2	8.15727e-05	DNAJC9	1044	INTU	0.333333	FKBP5	0.0149877	FKBP5
8514.03	MYL12A	7.43661	GJA5	-6604	TANC1	8.15727e-05	SLC40A1	1044	RTN4	0.333333	AR	0.0149867	AR
8511.75	CCDC50	7.43587	AMT	-6604	GJA5	8.15727e-05	SECISBP2L	1044	PLAT	0.333333	PRKACB	0.0149849	PRKACB
8504.75	PHLDA1	7.4351	G6PD	-6604	AMT	8.15727e-05	RGS5	1043	ADAMTS2	0.333333	ARL2BP	0.014983	ARL2BP
8502.48	ADCYAP1	7.43408	DUOX1	-6604	G6PD	8.15727e-05	IL10RA	1043	IRF1	0.333333	KIF2C	0.014978	KIF2C
8502.14	LAMC2	7.43356	ACE	-6604	DUOX1	8.15661e-05	CYP26A1	1043	HLA-DMB	0.333333	IGFBP3	0.0149774	IGFBP3
8500.11	SCMH1	7.43325	CORO2A	-6604	ACE	8.15661e-05	TBX3	1042	BCAS3	0.333333	SENP7	0.014974	SENP7
8496.65	PGM1	7.43318	AHNAK2	-6604	CORO2A	8.15594e-05	UPP1	1042	GFPT2	0.333333	STK17B	0.0149732	STK17B
8494.71	CENPA	7.43288	CRTC2	-6604	AHNAK2	8.15594e-05	SLC29A1	1042	TANK	0.333333	SKIL	0.0149724	SKIL
8485.33	TDRD3	7.43161	APLNR	-6604	CRTC2	8.15594e-05	HDC	1041	LGALS3	0.333333	RCOR1	0.0149651	RCOR1
8484.04	DHX38	7.43153	SOX7	-6604	APLNR	8.15594e-05	CYP26B1	1041	ST6GALNAC5	0.333333	YAP1	0.0149515	YAP1
8483.53	RUNX3	7.43142	RNF24	-6604	SOX7	8.15594e-05	FGR	1041	BAD	0.333333	STOM	0.0149511	STOM
8477.74	CCL19	7.4299	SLC16A2	-6604	RNF24	8.15594e-05	MAP2K6	1041	FHL1	0.333333	SLC29A1	0.0149511	SLC29A1
8475.6	CAPN2	7.42975	AIFM2	-6604	SLC16A2	8.15528e-05	RHOBTB2	1041	FGF2	0.333333	CYP7B1	0.0149499	CYP7B1
8469.62	FBN2	7.4281	THOP1	-6604	AIFM2	8.15528e-05	NUP155	1040	NAV3	0.333333	AKT3	0.0149411	AKT3
8464.75	UBA1	7.42588	PDCD6	-6604	THOP1	8.15528e-05	NELL2	1040	TBX3	0.333333	BCAS4	0.0149303	BCAS4
8461.07	FKBP5	7.42574	ZNF37A	-6604	PDCD6	8.15528e-05	PHC2	1040	PTCH1	0.333333	SDC4	0.0149291	SDC4
8456.05	RCAN2	7.42519	NDRG2	-6604	ZNF37A	8.15528e-05	CDKL5	1040	PRKACB	0.333333	RHOBTB1	0.0149266	RHOBTB1
8455.5	ALDH3A2	7.42434	BRD4	-6604	NDRG2	8.15528e-05	PTCH1	1040	TOPBP1	0.333333	TPD52	0.014925	TPD52
8439.97	COMMD1	7.42399	TRIM25	-6604	BRD4	8.15528e-05	PSD3	1039	MGST1	0.333333	MBIP	0.0149248	MBIP
8437.98	ACTR6	7.42318	TP53I3	-6604	TRIM25	8.15528e-05	CORO1C	1039	PLA2G4A	0.333333	SLC44A1	0.0149226	SLC44A1
8433.49	SMURF1	7.42278	ALDH1L1	-6604	TP53I3	8.15528e-05	TANK	1039	WNT4	0.333333	SERPINE2	0.0149187	SERPINE2
8429.91	PAX6	7.41923	SYNGR1	-6604	ALDH1L1	8.15461e-05	RRBP1	1039	CDKL5	0.333333	CYB5A	0.0149173	CYB5A
8428.12	JAK1	7.41857	PPIL3	-6604	SYNGR1	8.15461e-05	CEBPB	1039	GCLC	0.333333	MAP2K6	0.0149155	MAP2K6
8420.72	CTSB	7.41795	ERC1	-6604	PPIL3	8.15461e-05	BGN	1039	CDK8	0.333333	ATR	0.0149134	ATR
8414.49	RYR1	7.41646	HSD11B2	-6604	ERC1	8.15461e-05	ENO1	1039	TUBG1	0.333333	NCOR1	0.0149101	NCOR1
8411.46	HSD11B2	7.41541	SUGT1	-6604	HSD11B2	8.15461e-05	BCL2	1039	AURKB	0.333333	PLAT	0.0149077	PLAT
8405.99	ATR	7.41518	POLDIP2	-6604	SUGT1	8.15395e-05	CDA	1039	NFKBIA	0.333333	RHOBTB2	0.0149071	RHOBTB2
8405.39	SHC1	7.4142	TCEAL8	-6604	POLDIP2	8.15395e-05	ORC5	1037	SLC41A2	0.333333	RCAN2	0.0149069	RCAN2
8401.33	KYNU	7.41325	PYCARD	-6604	TCEAL8	8.15395e-05	FHL2	1037	ERH	0.333333	MAP4K5	0.0149006	MAP4K5
8400.93	ABCC4	7.41143	TNFRSF10D	-6604	PYCARD	8.15395e-05	CXCL9	1037	CXCR5	0.333333	SETMAR	0.0148967	SETMAR
8398.26	NDUFA9	7.41135	SPSB1	-6604	TNFRSF10D	8.15395e-05	DDB1	1037	ITM2B	0.333333	SMG1	0.0148956	SMG1
8397.69	CASP6	7.41132	CIRBP	-6604	SPSB1	8.15395e-05	GATAD1	1037	NUP155	0.333333	PPP2R2A	0.0148933	PPP2R2A
8393.54	NMI	7.41092	FAAH	-6604	CIRBP	8.15395e-05	KCND3	1037	CSNK2B	0.333333	EMP1	0.0148928	EMP1
8383.81	BGN	7.41058	RXFP1	-6604	FAAH	8.15395e-05	CCDC88A	1036	CD226	0.333333	SMAD3	0.0148891	SMAD3
8383.64	IL2RB	7.41054	FAM216A	-6604	RXFP1	8.15328e-05	PLIN1	1036	RIOK1	0.333333	TMED10	0.0148849	TMED10
8378.64	NF2	7.40857	CREBRF	-6604	FAM216A	8.15328e-05	DDX6	1036	SIAH2	0.333333	ZNF703	0.0148849	ZNF703
8377.25	BRS3	7.40759	CCR4	-6604	CREBRF	8.15328e-05	PRKACB	1036	CENPE	0.333333	PTPRE	0.0148829	PTPRE
8373.09	PRKACB	7.40723	TUSC2	-6604	CCR4	8.15328e-05	TRIB2	1036	FPR1	0.333333	INSR	0.0148827	INSR
8372.78	DERA	7.40669	FABP3	-6604	TUSC2	8.15328e-05	ERBIN	1035	HYOU1	0.333333	PTPRA	0.0148816	PTPRA
8370.99	AQP1	7.40666	SLC25A30	-6604	FABP3	8.15262e-05	BAD	1035	IGF2R	0.333333	PDSS2	0.0148808	PDSS2
8368.39	NAMPT	7.40386	ACTN3	-6604	SLC25A30	8.15262e-05	HMGN3	1035	APEX1	0.333333	POLQ	0.0148745	POLQ
8366.9	ORC2	7.40215	PAK1IP1	-6604	ACTN3	8.15262e-05	ANO2	1035	CASP1	0.333333	IGF2R	0.0148715	IGF2R
8366.59	POLD3	7.40202	MATK	-6604	PAK1IP1	8.15262e-05	MMRN1	1035	LMNB1	0.333333	BTAF1	0.0148601	BTAF1
8365.59	MLLT11	7.40081	CNP	-6604	MATK	8.15262e-05	RAP1A	1034	GSE1	0.333333	EEPD1	0.0148599	EEPD1
8362.08	TOP2A	7.40065	TRIM48	-6604	CNP	8.15262e-05	GCLC	1034	UBE2H	0.333333	HSPA9	0.0148593	HSPA9
8361.08	NOL11	7.40029	GATA4	-6604	TRIM48	8.15195e-05	RHOBTB1	1034	NELL2	0.333333	RUNX3	0.0148592	RUNX3
8358.89	RPA1	7.39878	CLIP2	-6604	GATA4	8.15195e-05	VASP	1034	ALDH3A2	0.333333	RNLS	0.0148493	RNLS
8357.27	SIAH2	7.39823	CRIP1	-6604	CLIP2	8.15195e-05	ZNF608	1033	PANX1	0.333333	C11orf71	0.0148455	C11orf71
8355.81	GPAM	7.3969	STC2	-6604	CRIP1	8.15129e-05	TIMP1	1033	CLSTN1	0.333333	NCL	0.0148454	NCL
8354.46	HSPB1	7.39565	CEACAM7	-6604	STC2	8.15129e-05	RHOB	1033	TSC22D2	0.333333	TNFRSF1B	0.0148421	TNFRSF1B
8350.73	BBOX1	7.39475	FAM114A1	-6604	CEACAM7	8.15129e-05	ATP10D	1033	NOL11	0.333333	NID1	0.0148392	NID1
8344.4	MNAT1	7.39437	FERMT1	-6604	FAM114A1	8.15129e-05	NOL11	1033	IGFBP3	0.333333	UGGT2	0.0148312	UGGT2
8339.75	ABCC3	7.39319	BGLAP	-6604	FERMT1	8.15129e-05	STIP1	1033	VAV1	0.333333	PPIC	0.0148279	PPIC
8336.66	CD27	7.39176	SEMA3F	-6604	BGLAP	8.15062e-05	PFKP	1032	DAPK2	0.333333	LGALS3	0.0148131	LGALS3
8325.35	DUSP5	7.38991	IFT74	-6604	SEMA3F	8.15062e-05	EXOC2	1032	CYP26A1	0.333333	ASAP2	0.014807	ASAP2
8322.76	MAGED2	7.38917	DIAPH1	-6604	IFT74	8.15062e-05	PUM2	1032	NPM1	0.333333	TLR2	0.0148015	TLR2
8320.7	PLCG1	7.38823	GATA5	-6604	DIAPH1	8.14996e-05	DMBT1	1031	RERG	0.333333	MOB3B	0.0147977	MOB3B
8316.63	CDK5	7.38758	SPAG1	-6604	GATA5	8.14996e-05	CDK6	1030	LTBR	0.333333	CDK6	0.0147965	CDK6
8301.8	KAT6B	7.38618	FAM189A2	-6604	SPAG1	8.1493e-05	RMI1	1030	SOX5	0.333333	FMO4	0.0147942	FMO4
8301.2	SPAG9	7.38615	IRF3	-6604	FAM189A2	8.1493e-05	TLR3	1030	TLR3	0.333333	SGCE	0.0147913	SGCE
8298.51	CCT6A	7.38604	TNFSF11	-6604	IRF3	8.1493e-05	PRDM2	1030	BMP6	0.333333	KDELR2	0.0147819	KDELR2
8297.91	TFCP2L1	7.38533	DMKN	-6604	TNFSF11	8.1493e-05	ETV5	1029	XDH	0.333333	FHL1	0.0147728	FHL1
8293.79	CD47	7.38532	GSAP	-6604	DMKN	8.1493e-05	AGO2	1029	SIRPA	0.333333	CAT	0.0147634	CAT
8290.44	ETV1	7.38485	RGMA	-6604	GSAP	8.1493e-05	COL12A1	1029	CPED1	0.333333	PAPOLA	0.0147616	PAPOLA
8290.04	NAB2	7.38445	DBN1	-6604	RGMA	8.14863e-05	RAB32	1029	CDC73	0.333333	DDX6	0.0147512	DDX6
8286.84	EDNRA	7.38232	MPL	-6604	DBN1	8.14863e-05	PKIA	1029	CCND1	0.333333	EDEM1	0.0147473	EDEM1
8285.2	FAM110B	7.38161	VIPR1	-6604	MPL	8.14863e-05	PLAT	1029	MSH6	0.333333	DAPK2	0.0147456	DAPK2
8285.09	CSF1R	7.38071	PCTP	-6604	VIPR1	8.14863e-05	DMD	1028	TMED10	0.333333	WNT4	0.0147409	WNT4
8282.84	BNC1	7.38047	LSS	-6604	PCTP	8.14863e-05	EGR1	1028	DST	0.333333	SYNPO	0.0147381	SYNPO
8282.51	PON2	7.38016	ZNF703	-6604	LSS	8.14797e-05	ZNF703	1028	E2F1	0.333333	TLR3	0.014732	TLR3
8276.97	PRIM1	7.37757	GSTM2	-6604	ZNF703	8.14797e-05	INHBB	1027	GPR135	0.333333	GNAS	0.0147308	GNAS
8271.5	NUCB2	7.37738	TNFRSF6B	-6604	GSTM2	8.14797e-05	PSMB8	1027	ARL15	0.333333	RRBP1	0.0147303	RRBP1
8270.91	ENPEP	7.37664	SLC2A10	-6604	TNFRSF6B	8.14797e-05	PNOC	1027	CEP350	0.333333	DNAJC9	0.0147295	DNAJC9
8270.22	PHYH	7.37655	NUPR1	-6604	SLC2A10	8.1473e-05	EMILIN1	1027	VASP	0.333333	KIF21A	0.0147207	KIF21A
8268.32	ACSM3	7.37625	ADCY4	-6604	NUPR1	8.1473e-05	FURIN	1027	ARNTL	0.333333	CDH19	0.014718	CDH19
8266.04	EVI2A	7.37511	HPGDS	-6604	ADCY4	8.1473e-05	C1R	1026	STK17B	0.333333	TYR	0.0147112	TYR
8265.99	BTRC	7.3748	EHMT2	-6604	HPGDS	8.1473e-05	KDELR2	1026	AOC3	0.333333	SPINT2	0.0147043	SPINT2
8265.08	SCHIP1	7.37351	MARK4	-6604	EHMT2	8.1473e-05	IGF2R	1025	PLIN3	0.333333	ARNTL	0.0147034	ARNTL
8264.03	ADARB2	7.37336	ECI2	-6604	MARK4	8.14664e-05	DUSP4	1025	DERA	0.333333	MYO5C	0.0147001	MYO5C
8257.76	BAG2	7.37319	C3orf52	-6604	ECI2	8.14664e-05	ITGA9	1025	CA3	0.333333	TUBB2A	0.0146923	TUBB2A
8250.04	GSTA4	7.37306	CIDEA	-6604	C3orf52	8.14664e-05	SCO1	1025	EZR	0.333333	CLSTN1	0.0146907	CLSTN1
8246.21	FOXN1	7.37283	PCK2	-6604	CIDEA	8.14664e-05	SESN3	1025	PPIB	0.333333	PAM	0.0146876	PAM
8245.02	CDK8	7.37277	NCSTN	-6604	PCK2	8.14598e-05	BAG3	1025	MTOR	0.333333	NELL2	0.0146802	NELL2
8240.21	BCAS3	7.37275	POU1F1	-6604	NCSTN	8.14598e-05	CYP11A1	1024	RIOK2	0.333333	EZR	0.0146796	EZR
8238.42	CREBBP	7.37269	INTS3	-6604	POU1F1	8.14598e-05	RAB5B	1024	RCAN1	0.333333	SIAH2	0.0146757	SIAH2
8235.7	HMGA1	7.37215	GHRHR	-6604	INTS3	8.14598e-05	TM6SF1	1024	NAB2	0.333333	ALDH7A1	0.0146705	ALDH7A1
8235.08	HNRNPU	7.37185	IL21	-6604	GHRHR	8.14598e-05	SLC7A6	1024	RCAN2	0.333333	VCL	0.0146669	VCL
8222.6	CA3	7.37131	BVES	-6604	IL21	8.14598e-05	CSK	1024	BAG2	0.333333	GFPT2	0.0146611	GFPT2
8208.6	KCNS3	7.37057	NPTX2	-6604	BVES	8.14598e-05	ARNTL	1024	XBP1	0.333333	TSPO	0.0146605	TSPO
8207.75	VASP	7.37009	HSPB9	-6604	NPTX2	8.14531e-05	ABCC3	1024	CASP6	0.333333	KAT6B	0.0146571	KAT6B
8205.28	HPRT1	7.36996	GNRH1	-6604	HSPB9	8.14531e-05	BAG2	1024	MAP2K1	0.333333	PDGFRL	0.0146503	PDGFRL
8205.21	XBP1	7.36938	NTN1	-6604	GNRH1	8.14531e-05	FHL1	1023	VOPP1	0.333333	ORC5	0.0146442	ORC5
8204.36	CTNNAL1	7.36884	THEM4	-6604	NTN1	8.14531e-05	BTK	1023	DUSP5	0.333333	UTP20	0.0146404	UTP20
8202.91	BMP6	7.36812	P2RY1	-6604	THEM4	8.14465e-05	COMMD1	1023	SELP	0.333333	SLC25A36	0.0146352	SLC25A36
8195.52	BTK	7.36697	BEX2	-6604	P2RY1	8.14465e-05	PRMT8	1023	PHC2	0.333333	ABCC3	0.0146315	ABCC3
8192.87	LAMA3	7.36541	ATN1	-6604	BEX2	8.14465e-05	CCND1	1023	KDELR2	0.333333	EGF	0.0146311	EGF
8191.82	TMTC2	7.36518	TNFRSF12A	-6604	ATN1	8.14399e-05	SLC7A5	1022	ARL2BP	0.333333	LGALS1	0.0146292	LGALS1
8188.93	ARAF	7.36493	NIPSNAP1	-6604	TNFRSF12A	8.14399e-05	WIF1	1022	NID1	0.333333	DUSP10	0.0146289	DUSP10
8187.54	FCER1G	7.36308	RMDN3	-6604	NIPSNAP1	8.14399e-05	CRYZ	1021	CHODL	0.333333	GNAI3	0.0146263	GNAI3
8184.82	SLCO2B1	7.36153	HPSE	-6604	RMDN3	8.14399e-05	MDH1	1021	CRTAP	0.333333	SYT7	0.0146261	SYT7
8183.6	SOX11	7.3613	SLC25A12	-6604	HPSE	8.14399e-05	RGS2	1021	CHRM3	0.333333	DUSP5	0.014624	DUSP5
8178.5	NDFIP2	7.36028	WNT5B	-6604	SLC25A12	8.14332e-05	PRDM16	1021	RHOB	0.333333	PCCA	0.0146233	PCCA
8175.79	MED14	7.36009	TM2D3	-6604	WNT5B	8.14332e-05	RCOR1	1021	PUM2	0.333333	OLFM1	0.0146222	OLFM1
8164	GABRA1	7.35919	PIWIL4	-6604	TM2D3	8.14266e-05	COX6A2	1021	GABRA1	0.333333	IL33	0.0146219	IL33
8162.6	SPEN	7.35824	LEP	-6604	PIWIL4	8.14266e-05	HSD17B11	1021	CDKN1B	0.333333	WIF1	0.0146188	WIF1
8162.25	PHC2	7.358	TSPAN17	-6604	LEP	8.14266e-05	PDGFRL	1021	RARA	0.333333	CUL5	0.0146188	CUL5
8160.59	TBC1D8	7.35748	SMG6	-6604	TSPAN17	8.14266e-05	GNAS	1020	GPAT3	0.333333	RPA2	0.014614	RPA2
8159.66	ST6GALNAC5	7.35508	ARHGEF26	-6604	SMG6	8.14266e-05	TPD52	1020	RHOBTB2	0.333333	PDCL3	0.0146095	PDCL3
8140.83	ZBTB16	7.35498	SETD5	-6604	ARHGEF26	8.14266e-05	CHD7	1020	RRBP1	0.333333	DNM1L	0.0146067	DNM1L
8140.51	SREBF2	7.35486	SUGP1	-6604	SETD5	8.14266e-05	TMED10	1020	CDA	0.333333	MEX3B	0.0146055	MEX3B
8140.14	ATP1B1	7.35278	ACADVL	-6604	SUGP1	8.14266e-05	FGF2	1020	PFKP	0.333333	EVA1A	0.0146037	EVA1A
8139.2	BUB1B	7.35207	CLDN7	-6604	ACADVL	8.142e-05	SENP7	1020	PTPRE	0.333333	TRPS1	0.0146014	TRPS1
8137.8	FBP1	7.35204	SRY	-6604	CLDN7	8.142e-05	HSD17B10	1020	BAX	0.333333	EGR1	0.0146006	EGR1
8135.53	AKAP10	7.35159	RHO	-6604	SRY	8.142e-05	FOCAD	1020	CASP7	0.333333	FZD7	0.0145963	FZD7
8134.45	ATP2A2	7.34939	SULT1A1	-6604	RHO	8.142e-05	MEOX1	1020	PAM	0.333333	KPNA2	0.0145926	KPNA2
8134.07	MAOA	7.34928	ZNF600	-6604	SULT1A1	8.142e-05	CA3	1020	IGF1	0.333333	CTNNAL1	0.0145902	CTNNAL1
8133.89	RAP1A	7.34826	HOXB7	-6604	ZNF600	8.142e-05	ATP5A1	1020	BMPR1A	0.333333	SMOC2	0.0145823	SMOC2
8133.12	IK	7.34786	MLPH	-6604	HOXB7	8.142e-05	STXBP6	1019	GRK3	0.333333	GABRA1	0.0145786	GABRA1
8128.27	UGCG	7.34545	IL2	-6604	MLPH	8.142e-05	BMPR2	1019	ENPEP	0.333333	MLLT3	0.0145765	MLLT3
8127.57	SFRP1	7.34524	MAD1L1	-6604	IL2	8.142e-05	RPS6KB1	1019	RAB5B	0.333333	RNF114	0.0145732	RNF114
8127.38	DUSP6	7.34499	SYT4	-6604	MAD1L1	8.14133e-05	NEURL1	1018	MRPL22	0.333333	FAM133B	0.014557	FAM133B
8124.34	TMTC1	7.34168	ITPR3	-6604	SYT4	8.14133e-05	GABRA1	1018	TRIB2	0.333333	ERCC4	0.0145558	ERCC4
8122.32	PTCH1	7.34143	CLASRP	-6604	ITPR3	8.14133e-05	DEPDC1	1018	FURIN	0.333333	STAT5B	0.0145556	STAT5B
8121.76	PKIA	7.33856	TM7SF2	-6604	CLASRP	8.14133e-05	NDUFA9	1017	ADARB2	0.333333	SNRPA	0.0145527	SNRPA
8120.41	AHNAK	7.33826	KCNH1	-6604	TM7SF2	8.14133e-05	PTPRE	1017	BDH1	0.333333	PKIA	0.0145502	PKIA
8118.27	FBLN5	7.33648	HPR	-6604	KCNH1	8.14133e-05	STK17B	1017	MDH1	0.333333	SGCB	0.0145481	SGCB
8117.43	NCL	7.33611	CNN2	-6604	HPR	8.14067e-05	GPA33	1016	XPO5	0.333333	BMP6	0.0145453	BMP6
8111.99	CASP7	7.3355	SETD1B	-6604	CNN2	8.14067e-05	UBB	1016	EDEM1	0.333333	SOX11	0.014541	SOX11
8107.2	USP5	7.33486	APBB1	-6604	SETD1B	8.14067e-05	CHCHD3	1016	MMRN1	0.333333	PLG	0.0145397	PLG
8098.42	PMAIP1	7.33449	CDK18	-6604	APBB1	8.14067e-05	CSRP2	1016	ATP10D	0.333333	HSD17B4	0.0145389	HSD17B4
8095.92	TMED3	7.3327	ATP1B2	-6604	CDK18	8.14067e-05	BAX	1016	PTPRA	0.333333	GLS	0.0145276	GLS
8094.27	SKI	7.33155	CAV3	-6604	ATP1B2	8.14067e-05	XBP1	1016	KAT6B	0.333333	TOP2A	0.0145262	TOP2A
8093.07	CORO1C	7.33107	ZNF22	-6604	CAV3	8.14067e-05	CDK8	1016	PLCG1	0.333333	DPYSL3	0.0145262	DPYSL3
8090.47	CRYAB	7.33077	CTSF	-6604	ZNF22	8.14067e-05	EEF1A1	1015	SMO	0.333333	S100A11	0.0145236	S100A11
8087.85	OPHN1	7.33033	TNFRSF14	-6604	CTSF	8.14001e-05	ADORA2B	1015	FAM171A1	0.333333	AMIGO2	0.0145194	AMIGO2
8081.09	LPIN1	7.33015	APPL2	-6604	TNFRSF14	8.14001e-05	SOSTDC1	1015	SECISBP2L	0.333333	SLC7A6	0.0145187	SLC7A6
8080.37	TP73	7.32981	RNF144B	-6604	APPL2	8.14001e-05	ARID2	1015	CCDC88A	0.333333	TRAM1	0.0145177	TRAM1
8075.21	UBB	7.32851	SART1	-6604	RNF144B	8.13935e-05	CTNNAL1	1015	DUSP4	0.333333	NOL11	0.0145174	NOL11
8072.17	ENAH	7.32851	LIF	-6604	SART1	8.13935e-05	NMI	1015	ROR2	0.333333	NEFM	0.0145171	NEFM
8070.11	HDC	7.32845	TMEFF2	-6604	LIF	8.13935e-05	SMPD1	1015	RPLP0	0.333333	PFKP	0.0145167	PFKP
8066.23	ROR2	7.3282	FOXQ1	-6604	TMEFF2	8.13935e-05	BCAS4	1014	RSPO3	0.333333	NPTN	0.0145146	NPTN
8063.33	AXL	7.32817	CEL	-6604	FOXQ1	8.13935e-05	ROR2	1014	ARPC1B	0.333333	INO80D	0.0145131	INO80D
8063.1	TM6SF1	7.32741	C4A	-6604	CEL	8.13935e-05	ADRA1A	1014	CLK2	0.333333	PFN2	0.0145098	PFN2
8062.44	TRAPPC10	7.327	ADCYAP1	-6604	C4A	8.13935e-05	PTPRA	1014	ORC1	0.333333	CREBBP	0.0145036	CREBBP
8061.26	HMGN3	7.32463	PIAS3	-6604	ADCYAP1	8.13935e-05	CYP7B1	1014	CREB1	0.333333	RASA2	0.0145032	RASA2
8052.47	HEXB	7.32397	SMARCD2	-6604	PIAS3	8.13868e-05	CLDN10	1014	HNRNPK	0.333333	WNT5A	0.0145019	WNT5A
8051.13	UGT8	7.32203	EFHD2	-6604	SMARCD2	8.13868e-05	CDC25B	1013	ALPP	0.333333	TMEM47	0.0144989	TMEM47
8048.16	PCK2	7.32183	PAX6	-6604	EFHD2	8.13868e-05	CLK2	1013	GNAS	0.333333	RHOB	0.0144981	RHOB
8047.66	ARPP21	7.32041	CYP1A1	-6604	PAX6	8.13868e-05	IDI1	1012	PSD3	0.333333	CD81	0.014495	CD81
8045.7	TNF	7.31875	KIF9	-6604	CYP1A1	8.13868e-05	SERPINE2	1012	EXOC2	0.333333	UPP1	0.0144915	UPP1
8045.1	EFNB2	7.31832	HES6	-6604	KIF9	8.13868e-05	STOM	1012	CDC25B	0.333333	AOC3	0.0144891	AOC3
8041.81	MGST1	7.31761	USP4	-6604	HES6	8.13802e-05	GPER1	1012	SMARCA4	0.333333	PGF	0.014487	PGF
8038.1	CYB5A	7.31688	IQCG	-6604	USP4	8.13802e-05	TRAPPC10	1012	HSP90AB1	0.333333	NETO2	0.0144865	NETO2
8036.66	TMEM168	7.31676	SOX1	-6604	IQCG	8.13802e-05	BMP6	1011	MLF2	0.333333	SMPD1	0.014486	SMPD1
8035.64	ABHD5	7.31653	SLC22A2	-6604	SOX1	8.13802e-05	SH3BP5	1011	PRDM2	0.333333	NDE1	0.0144829	NDE1
8032.65	SMARCD1	7.31555	TRIM26	-6604	SLC22A2	8.13802e-05	PPP6R3	1011	ETV5	0.333333	FHL2	0.0144818	FHL2
8031.95	RRBP1	7.31413	ZCCHC12	-6604	TRIM26	8.13802e-05	DST	1011	CRYZ	0.333333	FOS	0.0144769	FOS
8030.73	SORBS1	7.31355	TMEM119	-6604	ZCCHC12	8.13736e-05	H2AFX	1011	HMGA1	0.333333	CEBPB	0.0144736	CEBPB
8030.51	GOT1	7.31349	RHAG	-6604	TMEM119	8.13736e-05	RBM26	1010	ABCC3	0.333333	ARRDC3	0.0144662	ARRDC3
8022.38	KPNA2	7.31334	KCNA2	-6604	RHAG	8.13736e-05	GRIK2	1010	GRIK2	0.333333	TOR1AIP1	0.0144648	TOR1AIP1
8019.04	CCL1	7.31214	RPL39	-6604	KCNA2	8.13736e-05	YAP1	1010	AHSG	0.333333	ATP2B4	0.0144637	ATP2B4
8017.37	ST3GAL4	7.31185	TULP3	-6604	RPL39	8.1367e-05	ATP8B1	1010	RFC2	0.333333	IGFBP4	0.0144631	IGFBP4
8015.17	ETFB	7.31179	SLN	-6604	TULP3	8.1367e-05	CASP6	1009	RHOBTB1	0.333333	CDC5L	0.0144567	CDC5L
8010.4	LTBP1	7.31109	BSG	-6604	SLN	8.1367e-05	DNM1L	1009	CD27	0.333333	HYOU1	0.0144546	HYOU1
8003.67	RIT1	7.31064	AGAP2	-6604	BSG	8.1367e-05	SGCE	1008	DMBT1	0.333333	MMP2	0.0144453	MMP2
7997.29	SIRPA	7.31012	DLX2	-6604	AGAP2	8.1367e-05	NCOR1	1008	PPP2R2A	0.333333	OLFML2A	0.0144443	OLFML2A
7996.05	TACC3	7.31009	PEAR1	-6604	DLX2	8.13537e-05	MYO5C	1008	ITGB5	0.333333	ST18	0.0144431	ST18
7993.54	VAV1	7.30944	SLCO4C1	-6604	PEAR1	8.13537e-05	CDC5L	1007	BAG3	0.333333	EPHA7	0.0144399	EPHA7
7989.01	BIN1	7.30896	MICAL1	-6604	SLCO4C1	8.13471e-05	EDAR	1006	IL33	0.333333	DPM1	0.0144392	DPM1
7988.96	BCL2	7.30827	GTF2H4	-6604	MICAL1	8.13471e-05	TYR	1006	FH	0.333333	KIAA0040	0.0144359	KIAA0040
7982.21	MAP2K6	7.30816	APMAP	-6604	GTF2H4	8.13471e-05	ALDH3A2	1005	DNAJC9	0.333333	HOXB13	0.0144334	HOXB13
7979.68	STAR	7.30733	PPAT	-6604	APMAP	8.13471e-05	IL33	1005	SLC40A1	0.333333	PRKCD	0.014433	PRKCD
7974.22	IL10RA	7.30581	IRX3	-6604	PPAT	8.13471e-05	FUS	1005	ZNF608	0.333333	BMPR1A	0.0144276	BMPR1A
7974	P2RX4	7.30564	SUGP2	-6604	IRX3	8.13471e-05	MMP2	1005	STOM	0.333333	PLEKHA6	0.0144271	PLEKHA6
7970.08	ALOX12	7.30521	AJUBA	-6604	SUGP2	8.13471e-05	CREBBP	1005	CITED2	0.333333	BAG2	0.0144268	BAG2
7967.01	ADIRF	7.30392	ALG2	-6604	AJUBA	8.13405e-05	PDSS2	1005	SMARCD1	0.333333	SLC31A2	0.0144235	SLC31A2
7964.29	CLK1	7.30221	WASF3	-6604	ALG2	8.13405e-05	KAT6B	1005	CDK5	0.333333	SHC1	0.0144224	SHC1
7963.58	RHOD	7.3011	ATP6AP1	-6604	WASF3	8.13405e-05	KCNH8	1004	HDC	0.333333	CA3	0.0144222	CA3
7961.54	LSR	7.30073	OXCT1	-6604	ATP6AP1	8.13405e-05	CASP7	1004	GATAD1	0.333333	DEPDC1	0.0144199	DEPDC1
7952.05	CDKL5	7.30067	ESPL1	-6604	OXCT1	8.13405e-05	PCDH10	1004	TIMP1	0.333333	TRIP13	0.0144195	TRIP13
7950.75	CD69	7.30039	VAT1	-6604	ESPL1	8.13405e-05	STAT5B	1004	BLNK	0.333333	VEZF1	0.0144184	VEZF1
7946.05	ATP6V0D1	7.30013	SERPINB5	-6604	VAT1	8.13405e-05	CITED2	1004	LUM	0.333333	ANTXR2	0.0144127	ANTXR2
7942.23	FBLN7	7.29936	HOXC6	-6604	SERPINB5	8.13339e-05	NMU	1004	LMOD1	0.333333	PXDC1	0.0144044	PXDC1
7940.04	SLC29A1	7.29804	NUDT15	-6604	HOXC6	8.13339e-05	KLK6	1003	AGO2	0.333333	VASP	0.0144026	VASP
7939.92	BTD	7.29798	XRCC1	-6604	NUDT15	8.13339e-05	FA2H	1003	EMILIN1	0.333333	TBC1D9	0.0144008	TBC1D9
7939.43	SNTA1	7.2966	TNN	-6604	XRCC1	8.13339e-05	AMIGO2	1003	DNM1L	0.333333	NOTCH2	0.0143951	NOTCH2
7934.85	UBE2H	7.29655	PGRMC1	-6604	TNN	8.13339e-05	MDM1	1003	UBA1	0.333333	ELMO1	0.0143951	ELMO1
7931.65	PDGFRL	7.29577	POU5F1	-6604	PGRMC1	8.13339e-05	DOCK4	1003	CD14	0.333333	PIK3R3	0.0143917	PIK3R3
7929.19	RIOK1	7.29472	ZNF189	-6604	POU5F1	8.13339e-05	JAK2	1003	TK1	0.333333	DHRS7	0.0143816	DHRS7
7916.37	IMPA2	7.29435	KLF15	-6604	ZNF189	8.13273e-05	TUBG1	1001	PKIA	0.333333	C1R	0.0143785	C1R
7913.77	ATRN	7.29428	SCPEP1	-6604	KLF15	8.13273e-05	ELMO1	1001	ITGA9	0.333333	GREM2	0.0143734	GREM2
7907.14	SIRT2	7.29327	CSTB	-6604	SCPEP1	8.13273e-05	DUSP10	1001	TPD52	0.333333	EMILIN1	0.0143731	EMILIN1
7905.1	LAMB2	7.29283	PPM1E	-6604	CSTB	8.13273e-05	SLC31A2	1001	IDI1	0.333333	ZFR	0.0143677	ZFR
7894.69	MBIP	7.29196	SLC38A6	-6604	PPM1E	8.13273e-05	MSH6	1001	ALDH7A1	0.333333	HSD17B11	0.0143605	HSD17B11
7892.13	FUS	7.29187	AIP	-6604	SLC38A6	8.13273e-05	PAM	1000	INHBB	0.333333	WAPL	0.0143563	WAPL
7889.6	RBPMS	7.29091	TRPV2	-6604	AIP	8.13273e-05	EIF4A3	1000	C1R	0.333333	PRKCB	0.0143563	PRKCB
7881.21	DIP2A	7.29048	TMED3	-6604	TRPV2	8.13206e-05	C11orf71	1000	TYR	0.333333	CD63	0.0143505	CD63
7880.63	PTPRN	7.2898	TMSB15A	-6604	TMED3	8.13206e-05	IDH1	1000	SRSF1	0.333333	CYP7A1	0.0143475	CYP7A1
7876.15	SALL4	7.28963	CENPV	-6604	TMSB15A	8.13206e-05	PML	999	MEOX1	0.333333	TAB2	0.0143445	TAB2
7870.14	ELMO1	7.289	PLEKHG5	-6604	CENPV	8.13206e-05	CGNL1	999	HSPA5	0.333333	PNOC	0.0143437	PNOC
7869.97	JAK2	7.28831	GSTO1	-6604	PLEKHG5	8.13206e-05	PPP2R2A	998	E2F7	0.333333	ZNF281	0.0143436	ZNF281
7867.02	SLC7A6	7.28708	SLC12A1	-6604	GSTO1	8.13206e-05	IRF1	998	WIF1	0.333333	RAB32	0.0143397	RAB32
7864.41	ZFAND5	7.28684	MIF	-6604	SLC12A1	8.1314e-05	TFCP2L1	998	MYO5C	0.333333	ENO1	0.0143335	ENO1
7863.27	NAV3	7.28489	NFASC	-6604	MIF	8.1314e-05	HLA-DMB	998	EEF1E1	0.333333	HMGA2	0.0143303	HMGA2
7856.03	SLC5A5	7.28436	ATP6V0B	-6604	NFASC	8.1314e-05	FOS	998	TAGLN	0.333333	USP15	0.0143281	USP15
7855.45	ZNF608	7.28384	SYP	-6604	ATP6V0B	8.13074e-05	SOX11	997	RMI1	0.333333	RGS10	0.0143259	RGS10
7847.92	RHOQ	7.28373	FOXA1	-6604	SYP	8.13074e-05	UBA1	997	NMI	0.333333	OSMR	0.0143249	OSMR
7847.51	PPIB	7.28372	TLR7	-6604	FOXA1	8.13074e-05	SRGAP1	997	SGCE	0.333333	PLIN3	0.0143228	PLIN3
7842.61	PPP2R5E	7.28349	FGFBP1	-6604	TLR7	8.13074e-05	LGMN	997	ZBTB16	0.333333	MDH1	0.0143225	MDH1
7840.51	SLC41A2	7.28305	BDH1	-6604	FGFBP1	8.13008e-05	TTLL11	997	LCK	0.333333	CXCL9	0.0143218	CXCL9
7835.71	CHCHD3	7.28153	MED25	-6604	BDH1	8.13008e-05	NDE1	996	RAB32	0.333333	BAD	0.0143183	BAD
7834.8	MMRN1	7.281	GLCCI1	-6604	MED25	8.13008e-05	CYP7A1	996	AKT3	0.333333	MSH6	0.0143164	MSH6
7834.47	CDC37	7.28046	SNRPN	-6604	GLCCI1	8.13008e-05	EZR	996	GPX3	0.333333	KDELR3	0.0143162	KDELR3
7833.45	SOX5	7.27957	CAMK2N1	-6604	SNRPN	8.12942e-05	NPTN	995	HMGN3	0.333333	IL10RA	0.0143142	IL10RA
7829.19	NDUFS1	7.27936	AFAP1L1	-6604	CAMK2N1	8.12942e-05	RNLS	995	SFPQ	0.333333	CYP26A1	0.0143125	CYP26A1
7826.62	NR2C2	7.27919	WDR74	-6604	AFAP1L1	8.12942e-05	RASA2	994	HHIP	0.333333	ROR2	0.0143029	ROR2
7824.1	RASA3	7.27917	RFK	-6604	WDR74	8.12942e-05	DHRS7	994	PDGFRL	0.333333	CDK1	0.0143016	CDK1
7822.44	PLXDC1	7.27816	PXK	-6604	RFK	8.12942e-05	MOB3B	994	CSRP2	0.333333	CHCHD3	0.0142966	CHCHD3
7818.1	NDE1	7.27816	FIG4	-6604	PXK	8.12942e-05	SETMAR	994	CYP7B1	0.333333	WHSC1L1	0.0142957	WHSC1L1
7815.42	TUBA1C	7.27815	PCDH8	-6604	FIG4	8.12942e-05	PPIC	994	IDH1	0.333333	ZFPM2	0.0142853	ZFPM2
7803.86	AMIGO2	7.27761	RNF213	-6604	PCDH8	8.12942e-05	CDC42EP3	994	PPIC	0.333333	GCLM	0.014283	GCLM
7803.18	NPTN	7.27745	UCHL5	-6604	RNF213	8.12942e-05	HNRNPL	994	HNRNPA1	0.333333	NR1D2	0.0142826	NR1D2
7801.39	SMPD1	7.27726	EPHB6	-6604	UCHL5	8.12876e-05	TOR1B	993	PDXK	0.333333	BRAF	0.0142813	BRAF
7799.57	GRN	7.27705	INPP5A	-6604	EPHB6	8.12876e-05	SLC44A1	993	SLC29A1	0.333333	CELSR1	0.0142801	CELSR1
7797.71	CCND1	7.27568	HMBS	-6604	INPP5A	8.12876e-05	PENK	993	PLIN1	0.333333	CYP17A1	0.014279	CYP17A1
7796.99	AHSG	7.27541	SLC25A16	-6604	HMBS	8.12876e-05	AOC3	993	PNOC	0.333333	BDH1	0.0142731	BDH1
7788.05	CTSD	7.27514	TAF3	-6604	SLC25A16	8.12876e-05	INSR	993	NEURL1	0.333333	BGN	0.0142726	BGN
7785.01	MTSS1	7.27477	FA2H	-6604	TAF3	8.12876e-05	EZH2	993	DEPDC1	0.333333	NCKAP1	0.0142723	NCKAP1
7784.91	SLC5A2	7.27445	INHA	-6604	FA2H	8.1281e-05	SCMH1	993	SMPD1	0.333333	DGKI	0.0142657	DGKI
7782.86	IDH1	7.27411	MGAT3	-6604	INHA	8.1281e-05	ARID1B	993	PTP4A1	0.333333	DUSP4	0.0142646	DUSP4
7782.72	RGS10	7.2738	ELAC1	-6604	MGAT3	8.1281e-05	PPP1R3B	993	RAN	0.333333	ZBTB16	0.0142547	ZBTB16
7781.37	MVP	7.27338	MST1	-6604	ELAC1	8.12744e-05	SLC25A1	993	CRK	0.333333	SELP	0.0142518	SELP
7779.97	GEM	7.27309	HSPB2	-6604	MST1	8.12744e-05	CPOX	993	PTPN6	0.333333	PALMD	0.0142516	PALMD
7776.03	TYROBP	7.27301	ADAMTS4	-6604	HSPB2	8.12744e-05	PFN2	992	RGS2	0.333333	CDKN1B	0.0142456	CDKN1B
7775.92	RRAGA	7.27242	HOPX	-6604	ADAMTS4	8.12744e-05	PRKCB	992	DOCK4	0.333333	TRAPPC10	0.0142377	TRAPPC10
7769.8	A2M	7.27126	SUN2	-6604	HOPX	8.12744e-05	ITGB2	992	TUBA1C	0.333333	RPA1	0.0142362	RPA1
7767.15	CXCL6	7.27008	NIPAL2	-6604	SUN2	8.12678e-05	CNTFR	992	TUBA1B	0.333333	BNIP3L	0.0142311	BNIP3L
7763.81	PDSS2	7.26981	PLEKHB1	-6604	NIPAL2	8.12678e-05	CYP2A7	991	RCOR1	0.333333	BAX	0.0142264	BAX
7763.76	GPAT3	7.26974	CHID1	-6604	PLEKHB1	8.12678e-05	MYL12A	991	SENP7	0.333333	ETS2	0.0142244	ETS2
7763.4	MDH1	7.26833	MT1A	-6604	CHID1	8.12678e-05	CD14	991	ELMO1	0.333333	STAU2	0.014222	STAU2
7763.05	NOP2	7.26679	HNF1A	-6604	MT1A	8.12678e-05	MBIP	991	RASA2	0.333333	BLNK	0.0142214	BLNK
7762.35	ARNTL	7.26632	CDS1	-6604	HNF1A	8.12678e-05	ZBTB16	990	GPA33	0.333333	RGL1	0.0142211	RGL1
7760.6	DNAJC9	7.26589	PHGDH	-6604	CDS1	8.12678e-05	PCCA	990	UBB	0.333333	UBB	0.0142179	UBB
7751.36	PFKP	7.26449	MYL4	-6604	PHGDH	8.12678e-05	ALDH7A1	990	APLP1	0.333333	CCND1	0.0142177	CCND1
7749.66	MAP4K1	7.26383	DOCK9	-6604	MYL4	8.12678e-05	PPIB	990	NOTCH2	0.333333	OPA1	0.0142146	OPA1
7744.54	PNP	7.2635	TNFSF12	-6604	DOCK9	8.12678e-05	IGFBP3	990	TRAM1	0.333333	MAP4	0.0142067	MAP4
7739.83	TNFRSF25	7.26347	GPATCH8	-6604	TNFSF12	8.12612e-05	POLQ	990	MNAT1	0.333333	STC1	0.0142042	STC1
7736.3	NEDD8	7.26333	RHOBTB3	-6604	GPATCH8	8.12546e-05	ADA	989	GPER1	0.333333	NET1	0.0142014	NET1
7735.44	PAPOLG	7.26224	RND1	-6604	RHOBTB3	8.12546e-05	RGS10	989	PLAUR	0.333333	FGR	0.0141996	FGR
7734.11	CENPE	7.26205	CLPTM1L	-6604	RND1	8.12546e-05	BCL2A1	989	FGFR1	0.333333	LGMN	0.0141976	LGMN
7731.62	MTOR	7.26158	SURF1	-6604	CLPTM1L	8.12546e-05	MLLT3	989	EEF2	0.333333	TFCP2L1	0.0141969	TFCP2L1
7726.27	NOTCH2	7.2614	PRDX4	-6604	SURF1	8.12546e-05	HDAC9	989	ACTB	0.333333	RAB18	0.0141963	RAB18
7724.79	PDXK	7.26077	BECN1	-6604	PRDX4	8.12546e-05	GART	988	SLC7A5	0.333333	ADCY7	0.0141846	ADCY7
7723.57	HMGN2	7.25975	RGS20	-6604	BECN1	8.1248e-05	UNC50	988	DUSP10	0.333333	PTP4A1	0.0141842	PTP4A1
7718.58	PDE4B	7.25814	ARSA	-6604	RGS20	8.1248e-05	EPHX2	988	MYL12A	0.333333	COL3A1	0.0141841	COL3A1
7717.53	ZFPM2	7.25811	SFN	-6604	ARSA	8.1248e-05	BTD	988	CEBPZ	0.333333	SEMA3D	0.0141841	SEMA3D
7717.52	PPL	7.25806	FXYD6	-6604	SFN	8.1248e-05	APLP1	988	E2F3	0.333333	CCNB1	0.0141824	CCNB1
7715	HSD17B11	7.25652	AICDA	-6604	FXYD6	8.1248e-05	EVA1C	987	CTNNAL1	0.333333	JAK2	0.014178	JAK2
7713.54	MAGED1	7.25625	PRKD2	-6604	AICDA	8.1248e-05	NID1	987	HSD17B6	0.333333	DIP2A	0.0141709	DIP2A
7709.59	SUN2	7.25607	LBH	-6604	PRKD2	8.1248e-05	IGF1	987	PRELP	0.333333	ILDR2	0.0141673	ILDR2
7709.03	SPRY4	7.25469	TXN2	-6604	LBH	8.12414e-05	ZNF281	986	SERPINE2	0.333333	ATRN	0.0141536	ATRN
7702.58	TMED10	7.25457	GDE1	-6604	TXN2	8.12414e-05	CSNK2B	986	SLC31A2	0.333333	WWOX	0.0141521	WWOX
7702.26	ESRRB	7.25383	QPCT	-6604	GDE1	8.12414e-05	BLNK	986	NDE1	0.333333	SCMH1	0.0141449	SCMH1
7701.02	LAMA5	7.25315	PTPRN	-6604	QPCT	8.12414e-05	CTSL	986	SGCB	0.333333	MYO6	0.0141328	MYO6
7699.7	GNAS	7.25264	FDXR	-6604	PTPRN	8.12414e-05	CENPE	986	TRA2A	0.333333	FSTL1	0.0141288	FSTL1
7699.31	MPP7	7.25166	PLIN3	-6604	FDXR	8.12414e-05	CDKN1B	985	CYP26B1	0.333333	CASP6	0.0141254	CASP6
7697.59	CYP7A1	7.24985	APLN	-6604	PLIN3	8.12414e-05	BUB1B	985	KCND3	0.333333	CRYZ	0.0141214	CRYZ
7695.86	PANX1	7.24983	CRISPLD1	-6604	APLN	8.12348e-05	ST3GAL4	985	DHRS7	0.333333	DNMT1	0.0141197	DNMT1
7695.83	KBTBD11	7.24868	CST3	-6604	CRISPLD1	8.12348e-05	PMAIP1	985	PAPOLA	0.333333	CDK8	0.0141183	CDK8
7692.86	WWOX	7.24848	RAD17	-6604	CST3	8.12348e-05	SLC25A36	985	TAB2	0.333333	MAPK8	0.0141158	MAPK8
7692.59	BCL2A1	7.24736	OXTR	-6604	RAD17	8.12348e-05	SGCB	984	UPP1	0.333333	C4BPA	0.0141099	C4BPA
7690.62	RIOK2	7.2467	KEAP1	-6604	OXTR	8.12348e-05	TRAF6	984	CYP7A1	0.333333	SRI	0.0141034	SRI
7689.31	GABBR1	7.24639	DGCR8	-6604	KEAP1	8.12282e-05	MAD1L1	984	HDAC9	0.333333	ATXN7L1	0.0140952	ATXN7L1
7688.28	TSC22D2	7.24636	MAP3K6	-6604	DGCR8	8.12282e-05	FPR1	984	TNF	0.333333	FAM126A	0.0140903	FAM126A
7684.94	MAPT	7.24631	RUNX2	-6604	MAP3K6	8.12282e-05	ZFP36	983	SLC7A6	0.333333	NAB1	0.0140885	NAB1
7680.29	SERPINB1	7.24486	SEMA3G	-6604	RUNX2	8.12282e-05	NOTCH2	983	SH3BP5	0.333333	RMI1	0.0140872	RMI1
7679.44	E2F1	7.24444	FABP7	-6604	SEMA3G	8.12282e-05	GLS	983	PPP6R3	0.333333	PPM1A	0.0140818	PPM1A
7670.78	OMD	7.24129	ALDH1B1	-6604	FABP7	8.12282e-05	TRPS1	983	PENK	0.333333	SFPQ	0.014078	SFPQ
7663.19	CDK9	7.2407	GALNT16	-6604	ALDH1B1	8.12282e-05	EMP1	983	ADA	0.333333	TMCC3	0.014072	TMCC3
7661.96	MGAT1	7.23968	NKD1	-6604	GALNT16	8.12282e-05	AKT3	983	BCL2A1	0.333333	NEURL1	0.014069	NEURL1
7660.04	TBX3	7.23902	ACSM3	-6604	NKD1	8.12216e-05	GABBR1	983	CDH19	0.333333	LTBR	0.0140659	LTBR
7658.82	DGKI	7.2382	TMEM158	-6604	ACSM3	8.12216e-05	NT5DC1	983	TSC1	0.333333	GCNT1	0.0140612	GCNT1
7657.15	EGR1	7.23796	EVA1B	-6604	TMEM158	8.12216e-05	VEZF1	982	PPP1R3B	0.333333	NDUFA9	0.0140535	NDUFA9
7654.09	CELSR1	7.234	CD160	-6604	EVA1B	8.12216e-05	CDH19	982	ADCY7	0.333333	IDI1	0.0140526	IDI1
7653.41	ERBIN	7.23264	STYK1	-6604	CD160	8.12216e-05	MAPK8	982	ADGRE5	0.333333	CLEC3B	0.014052	CLEC3B
7650.26	PFN2	7.23226	DLX5	-6604	STYK1	8.1215e-05	MMP15	982	IFIT3	0.333333	NUP155	0.0140515	NUP155
7648.4	TPM4	7.23168	ABHD6	-6604	DLX5	8.1215e-05	DIP2A	982	PDIA3	0.333333	SDPR	0.0140504	SDPR
7648.07	LRP8	7.23142	SMN1	-6604	ABHD6	8.1215e-05	HMGA2	982	GSTA4	0.333333	XBP1	0.0140495	XBP1
7645.98	GPR183	7.23055	IL12RB1	-6604	SMN1	8.1215e-05	WWOX	981	ATP8B1	0.333333	PTPN21	0.0140449	PTPN21
7641.77	E2F7	7.22951	ETV4	-6604	IL12RB1	8.1215e-05	PXDC1	981	CNTFR	0.333333	MTUS1	0.0140416	MTUS1
7641.56	RFXAP	7.22941	TRAF4	-6604	ETV4	8.1215e-05	AHSG	979	ADORA2B	0.333333	ATP8A1	0.0140414	ATP8A1
7631.32	NFKBIA	7.22837	DFFA	-6604	TRAF4	8.1215e-05	EPHA7	979	ADRA1A	0.333333	IL2RB	0.01404	IL2RB
7627.4	ARG1	7.22808	SUSD2	-6604	DFFA	8.1215e-05	UGGT2	979	MSN	0.333333	BTK	0.0140392	BTK
7623.89	NR2F2	7.22747	CCPG1	-6604	SUSD2	8.1215e-05	MAP4K5	979	RANBP2	0.333333	PXN	0.0140371	PXN
7620.35	PCOLCE	7.22685	NAIP	-6604	CCPG1	8.12084e-05	CDK20	978	PRMT8	0.333333	N4BP1	0.0140316	N4BP1
7620	PTPRA	7.2268	FGF4	-6604	NAIP	8.12084e-05	TAB1	978	EPHA7	0.333333	ALDH3A2	0.014029	ALDH3A2
7617.16	EEF2	7.22665	AZGP1	-6604	FGF4	8.12084e-05	KIF21A	978	ANP32A	0.333333	GAD1	0.0140193	GAD1
7615.85	DHRS7	7.22627	UNC5CL	-6604	AZGP1	8.12084e-05	SYNPO	978	HSPB1	0.333333	CENPC	0.0140178	CENPC
7612.82	ATP10D	7.22566	CBX6	-6604	UNC5CL	8.12084e-05	NEFM	978	PGM1	0.333333	ADORA2B	0.0140121	ADORA2B
7611.19	ACACB	7.22555	FZD6	-6604	CBX6	8.12018e-05	ATRN	978	PSMC3	0.333333	PDIA3	0.0140121	PDIA3
7609.37	FHL1	7.22544	EMP3	-6604	FZD6	8.12018e-05	EEF1E1	978	ELAVL1	0.333333	TNFRSF14	0.0140118	TNFRSF14
7608.63	HLA-DRB1	7.22456	PTGDS	-6604	EMP3	8.12018e-05	ERCC4	977	PCDH10	0.333333	PHF2	0.0140076	PHF2
7607.59	LY96	7.22424	AGXT	-6604	PTGDS	8.12018e-05	ABI3BP	977	KLK6	0.333333	FOXM1	0.0140057	FOXM1
7601.38	IL33	7.22368	PRDX5	-6604	AGXT	8.11952e-05	SRI	977	ZFP36	0.333333	JCHAIN	0.0140041	JCHAIN
7601.27	TSHB	7.22321	ABHD2	-6604	PRDX5	8.11952e-05	CENPC	977	FSTL1	0.333333	GPRC5A	0.0139976	GPRC5A
7600.1	MAPK13	7.22108	FIS1	-6604	ABHD2	8.11952e-05	PABPC1	976	ACADM	0.333333	PIGK	0.0139969	PIGK
7600.05	E2F8	7.22095	MAP3K11	-6604	FIS1	8.11886e-05	SALL2	976	PIK3R3	0.333333	MDFIC	0.0139928	MDFIC
7599.48	RAC3	7.22082	HDAC6	-6604	MAP3K11	8.11886e-05	MBOAT7	976	ICAM1	0.333333	CNR1	0.0139881	CNR1
7598.3	PRPH	7.22024	UBA7	-6604	HDAC6	8.11886e-05	MEX3B	976	GOT1	0.333333	INHBB	0.0139854	INHBB
7594.71	RCOR1	7.21968	KLF3	-6604	UBA7	8.11886e-05	CELSR1	976	PIK3CG	0.333333	ST3GAL4	0.013985	ST3GAL4
7593.46	TPMT	7.21959	ACOT7	-6604	KLF3	8.11886e-05	TBC1D9	976	STAR	0.333333	SH3KBP1	0.0139748	SH3KBP1
7592.68	STAT5B	7.21938	BRD8	-6604	ACOT7	8.11886e-05	WNT5A	976	SRSF3	0.333333	ADGRF5	0.0139728	ADGRF5
7589.12	UBE2S	7.21773	ORMDL2	-6604	BRD8	8.11886e-05	PLAUR	975	ZNF703	0.333333	PTPN2	0.0139669	PTPN2
7587.54	GLI2	7.21722	DUSP26	-6604	ORMDL2	8.11886e-05	TMEM117	974	SCO1	0.333333	ANP32A	0.0139549	ANP32A
7586.84	MCM5	7.21722	ELAVL3	-6604	DUSP26	8.11886e-05	ADCY7	974	BRAF	0.333333	GABBR1	0.0139521	GABBR1
7586.1	FREM1	7.21564	PIWIL1	-6604	ELAVL3	8.11886e-05	TRAM1	974	BRCA2	0.333333	FURIN	0.0139511	FURIN
7585.45	RASA2	7.21518	BRS3	-6604	PIWIL1	8.11886e-05	CCNA2	973	MPP7	0.333333	KBTBD11	0.0139432	KBTBD11
7585.31	CLEC11A	7.21503	SLC25A37	-6604	BRS3	8.1182e-05	ACSM3	973	HSD17B11	0.333333	LHFPL2	0.013942	LHFPL2
7584.51	AGTR1	7.21495	DDC	-6604	SLC25A37	8.1182e-05	ACTR6	973	CHD7	0.333333	PTGER3	0.0139417	PTGER3
7582.43	CHRM3	7.21486	SPC24	-6604	DDC	8.1182e-05	NETO2	973	BCAS4	0.333333	PLAGL1	0.0139415	PLAGL1
7581.46	CRABP2	7.21387	DIO1	-6604	SPC24	8.1182e-05	PLEKHA6	973	TFCP2L1	0.333333	CASP7	0.0139404	CASP7
7581.43	TYR	7.21213	CX3CR1	-6604	DIO1	8.1182e-05	BMPR1A	973	CDC42EP3	0.333333	ZFP36	0.0139317	ZFP36
7579.37	AOX1	7.21145	H6PD	-6604	CX3CR1	8.1182e-05	VCL	973	MLLT3	0.333333	DEGS1	0.0139302	DEGS1
7577.77	ITGA9	7.21106	AGRN	-6604	H6PD	8.11754e-05	FAAH	973	GLS	0.333333	GSN	0.0139288	GSN
7575.43	MAPK8	7.21075	SGO2	-6604	AGRN	8.11754e-05	IMPA2	973	CENPC	0.333333	NMI	0.0139284	NMI
7575.23	CDK6	7.21041	TEAD4	-6604	SGO2	8.11754e-05	DHX38	973	FAH	0.333333	KDM5B	0.0139265	KDM5B
7573.34	KDELR2	7.20965	FXYD3	-6604	TEAD4	8.11754e-05	MNAT1	973	RUVBL2	0.333333	LUM	0.0139236	LUM
7571.67	ITM2B	7.20813	HOMER3	-6604	FXYD3	8.11754e-05	MDN1	972	TM6SF1	0.333333	SLC7A5	0.0139114	SLC7A5
7567.24	PRDM2	7.20801	B4GALT5	-6604	HOMER3	8.11754e-05	SMG1	972	STXBP6	0.333333	PAX3	0.0139099	PAX3
7564.87	MEOX1	7.2073	CRH	-6604	B4GALT5	8.11688e-05	NEUROD2	972	TRAPPC10	0.333333	CCT6A	0.0139037	CCT6A
7557.89	ZFP36	7.20458	UQCR10	-6604	CRH	8.11688e-05	PHYH	972	CPOX	0.333333	GPR137B	0.0139035	GPR137B
7552.47	CSRP2	7.20286	CMTM7	-6604	UQCR10	8.11688e-05	JCHAIN	972	CTSL	0.333333	PRIM1	0.0139028	PRIM1
7550.44	MBOAT7	7.20258	ZNF654	-6604	CMTM7	8.11688e-05	TTC3	972	BIN1	0.333333	HLA-DMB	0.0139006	HLA-DMB
7545.74	PLAT	7.20253	SLC6A12	-6604	ZNF654	8.11688e-05	PXN	972	ZNF638	0.333333	FGFR1	0.0138998	FGFR1
7542.24	SLC40A1	7.20209	SLC2A5	-6604	SLC6A12	8.11622e-05	EPHB6	972	UBE2D1	0.333333	ARPC1B	0.0138981	ARPC1B
7539.07	MTHFD1	7.20183	ESRRB	-6604	SLC2A5	8.11622e-05	KBTBD11	972	PSME4	0.333333	IDH1	0.0138977	IDH1
7530.91	PAX7	7.20149	GKAP1	-6604	ESRRB	8.11622e-05	GCNT1	972	HDAC3	0.333333	CHD2	0.013893	CHD2
7530.8	DNM1L	7.20057	PHKA2	-6604	GKAP1	8.11622e-05	PTPN2	971	PFN2	0.333333	SH2D4A	0.0138902	SH2D4A
7530.1	VIPR1	7.20041	DNAJA4	-6604	PHKA2	8.11622e-05	HMGA1	971	EMP1	0.333333	CA12	0.0138892	CA12
7529.34	SRI	7.20007	CCL21	-6604	DNAJA4	8.11622e-05	KIAA0040	971	WWOX	0.333333	PSME4	0.0138878	PSME4
7526.67	RSPO3	7.19942	TCEAL9	-6604	CCL21	8.11622e-05	MAP2K1	971	CRYAB	0.333333	GNRHR	0.0138852	GNRHR
7525.23	MDN1	7.19844	TMTC3	-6604	TCEAL9	8.11557e-05	ING1	971	ARAF	0.333333	FREM1	0.0138807	FREM1
7524.22	PTPN11	7.19707	KPNA5	-6604	TMTC3	8.11557e-05	OS9	970	CHCHD3	0.333333	CASK	0.0138805	CASK
7518.46	CENPC	7.19639	TNFSF4	-6604	KPNA5	8.11557e-05	P2RX4	970	SOSTDC1	0.333333	CAMKMT	0.0138732	CAMKMT
7515.57	C1R	7.19634	DNAJC27	-6604	TNFSF4	8.11557e-05	SEMA3D	970	TOR1B	0.333333	E2F8	0.0138731	E2F8
7513.57	GATAD1	7.19535	DRD2	-6604	DNAJC27	8.11557e-05	FAH	970	CYP2A7	0.333333	RANBP2	0.0138729	RANBP2
7512.85	TUBA1B	7.19513	DRD5	-6604	DRD2	8.11557e-05	NR2C2	970	EPHX2	0.333333	S100A10	0.0138727	S100A10
7504.3	OPN1SW	7.19462	BEX4	-6604	DRD5	8.11557e-05	E2F8	970	TRPS1	0.333333	NFAT5	0.0138696	NFAT5
7503.02	SERPINE2	7.19436	CCR3	-6604	BEX4	8.11557e-05	RGL1	970	CELSR1	0.333333	ALG14	0.0138687	ALG14
7498.91	RPLP0	7.19374	ETFB	-6604	CCR3	8.11557e-05	OSMR	970	RAP2A	0.333333	TRIM33	0.0138666	TRIM33
7498.38	PABPC1	7.19342	KCNIP3	-6604	ETFB	8.11557e-05	MTOR	969	LGMN	0.333333	CDA	0.0138666	CDA
7495.03	ACADM	7.19333	ZNF439	-6604	KCNIP3	8.11557e-05	SKIL	969	PCCA	0.333333	NIPBL	0.0138635	NIPBL
7494.4	CHPF	7.19326	THBS3	-6604	ZNF439	8.11491e-05	SLC9A3R1	969	RGS10	0.333333	PMAIP1	0.013863	PMAIP1
7492.41	HAMP	7.19289	TAF1A	-6604	THBS3	8.11491e-05	BIN1	969	VEZF1	0.333333	TRA2A	0.0138547	TRA2A
7490.15	MYOG	7.19288	NDST1	-6604	TAF1A	8.11491e-05	EVA1A	969	SKIL	0.333333	MYO5A	0.0138543	MYO5A
7487.82	TANK	7.19276	GABPB1	-6604	NDST1	8.11491e-05	SMARCD1	969	STAU2	0.333333	ABCB4	0.0138508	ABCB4
7484.31	POLD1	7.19273	PRDM11	-6604	GABPB1	8.11491e-05	SMOC2	969	HLA-DRB1	0.333333	NOX5	0.0138507	NOX5
7480.56	PSMB1	7.19004	CUL5	-6604	PRDM11	8.11491e-05	STAU2	969	ATP2B4	0.333333	PML	0.0138492	PML
7468.22	DVL1	7.18994	CDK5R1	-6604	CUL5	8.11491e-05	VAV1	969	UBE2I	0.333333	CREB1	0.0138448	CREB1
7464.87	PIM2	7.18942	CHST14	-6604	CDK5R1	8.11491e-05	PTP4A1	968	EDAR	0.333333	CTSL	0.013844	CTSL
7461.27	SECISBP2L	7.18922	CMSS1	-6604	CHST14	8.11491e-05	PAPOLA	968	PTPN2	0.333333	PIK3CG	0.0138428	PIK3CG
7460.22	KAT5	7.18914	IKBKG	-6604	CMSS1	8.11425e-05	DPF1	968	OSMR	0.333333	ITGB5	0.0138318	ITGB5
7460.08	BLM	7.18756	SLC3A2	-6604	IKBKG	8.11425e-05	TSC1	968	ENG	0.333333	CPOX	0.0138291	CPOX
7458.1	TPD52	7.18693	SNRNP25	-6604	SLC3A2	8.11425e-05	GRN	968	FGFR4	0.333333	DMBT1	0.0138268	DMBT1
7456.53	PGRMC1	7.18686	TUBB6	-6604	SNRNP25	8.11425e-05	ZFPM2	968	PARPBP	0.333333	PLEKHF2	0.0138233	PLEKHF2
7453.81	ZNF281	7.18678	FLT4	-6604	TUBB6	8.11425e-05	TUBA1C	967	ANO2	0.333333	ACACB	0.0138191	ACACB
7450.26	CDC5L	7.18613	SLC22A4	-6604	FLT4	8.11425e-05	GPRC5A	967	UNC50	0.333333	FA2H	0.0138183	FA2H
7449.64	YAP1	7.1856	COMMD1	-6604	SLC22A4	8.11425e-05	ACADM	967	TAB1	0.333333	TP53BP1	0.0138136	TP53BP1
7448.47	SCG2	7.18539	SMOX	-6604	COMMD1	8.11425e-05	ADGRE5	966	COX6A2	0.333333	NR2C2	0.0138136	NR2C2
7441.22	COX7A2	7.18497	IMPDH2	-6604	SMOX	8.11425e-05	STAT1	966	FA2H	0.333333	ZMAT3	0.0138115	ZMAT3
7437.52	PSMB10	7.18483	SPTY2D1	-6604	IMPDH2	8.11359e-05	IFIT3	966	MBIP	0.333333	B3GNT7	0.0138061	B3GNT7
7427.64	DSP	7.18423	RHBDF2	-6604	SPTY2D1	8.11359e-05	ENG	966	GABBR1	0.333333	RAD52	0.0138022	RAD52
7425.02	MYO5C	7.18403	TFE3	-6604	RHBDF2	8.11359e-05	MAP4	966	MAP4K5	0.333333	PREX1	0.0138006	PREX1
7421.5	ODC1	7.18326	RASA4	-6604	TFE3	8.11359e-05	HSD17B6	966	TP53BP1	0.333333	STAT1	0.0137966	STAT1
7421.01	EPB41L2	7.18308	SNURF	-6604	RASA4	8.11359e-05	ZFR	966	AOX1	0.333333	TES	0.0137941	TES
7420.15	SLC31A2	7.18255	MMP12	-6604	SNURF	8.11359e-05	TAB2	966	CDC42	0.333333	CPEB2	0.0137905	CPEB2
7406.1	DEPDC1	7.18145	FMO1	-6604	MMP12	8.11359e-05	TOPBP1	966	ACTA2	0.333333	TRAF6	0.0137903	TRAF6
7405.16	PSD3	7.18072	HK2	-6604	FMO1	8.11359e-05	MCM5	965	SESN3	0.333333	NMU	0.0137877	NMU
7396.55	TOPBP1	7.18032	SLC51A	-6604	HK2	8.11293e-05	COX8A	965	AMIGO2	0.333333	RRM2B	0.0137873	RRM2B
7394.8	BCAS4	7.1801	PDCD1LG2	-6604	SLC51A	8.11293e-05	HLA-DRB1	965	NEFM	0.333333	CBLB	0.0137852	CBLB
7394.43	ENO1	7.17984	STRA6	-6604	PDCD1LG2	8.11293e-05	AURKB	965	WNT5A	0.333333	KCNMB4	0.0137801	KCNMB4
7394.27	INPP4B	7.17981	ITPKA	-6604	STRA6	8.11227e-05	CD27	965	GATA1	0.333333	RAB5B	0.0137793	RAB5B
7392.64	ENG	7.17761	CARM1	-6604	ITPKA	8.11227e-05	ANP32A	965	DPYSL3	0.333333	PABPC1	0.013775	PABPC1
7389.1	PCCA	7.17742	MKNK2	-6604	CARM1	8.11227e-05	GAD1	965	RBPMS	0.333333	ZNF638	0.0137738	ZNF638
7388.24	IGF2R	7.17665	SUSD6	-6604	MKNK2	8.11227e-05	ASAP2	964	PRDM16	0.333333	MAP2K1	0.0137735	MAP2K1
7387.79	LIMA1	7.17635	TEP1	-6604	SUSD6	8.11227e-05	NFKBIA	964	MMP15	0.333333	IL2RG	0.0137706	IL2RG
7381.1	EZH2	7.17569	PHF14	-6604	TEP1	8.11227e-05	BLM	964	ACTR6	0.333333	MSN	0.0137669	MSN
7372.03	POU2F1	7.17389	ADGRE3	-6604	PHF14	8.11162e-05	EVI2A	964	ARG1	0.333333	PPP2R5A	0.0137659	PPP2R5A
7369.58	CBX4	7.17296	NCR2	-6604	ADGRE3	8.11162e-05	FGFR4	963	CLDN10	0.333333	TRAF3IP2	0.0137657	TRAF3IP2
7368.84	TSPYL4	7.17232	KANSL2	-6604	NCR2	8.11162e-05	ALOX12	963	NR2C2	0.333333	PPID	0.0137625	PPID
7365.27	CTSA	7.1717	LGALS3BP	-6604	KANSL2	8.11162e-05	PARPBP	963	ZFR	0.333333	MYL12A	0.0137612	MYL12A
7364.83	HHIP	7.17052	SIRT2	-6604	LGALS3BP	8.11162e-05	DGKI	963	FCGR2B	0.333333	TACC1	0.0137603	TACC1
7353.94	PCBD1	7.16916	EFNB1	-6604	SIRT2	8.11162e-05	INO80D	963	SERPINE1	0.333333	ATP5A1	0.0137587	ATP5A1
7352.06	RUVBL2	7.1664	SCLT1	-6604	EFNB1	8.11162e-05	PDCD10	963	CD4	0.333333	SAMD4A	0.0137533	SAMD4A
7349.97	RAP2A	7.1662	OLR1	-6604	SCLT1	8.11162e-05	ABCB4	963	COL6A1	0.333333	MTOR	0.0137494	MTOR
7345.67	MAGEH1	7.16526	ING5	-6604	OLR1	8.11162e-05	PTPN21	962	NMU	0.333333	PPM1B	0.0137493	PPM1B
7345.21	PUM2	7.16348	TYK2	-6604	ING5	8.11096e-05	NUCB2	962	BTD	0.333333	MDN1	0.0137418	MDN1
7344.65	PRKCG	7.16221	CARHSP1	-6604	TYK2	8.11096e-05	SYT7	962	GPRC5A	0.333333	PLIN1	0.013741	PLIN1
7343.14	RARA	7.1615	PAX7	-6604	CARHSP1	8.11096e-05	TUBA1B	962	MYO6	0.333333	NAV1	0.0137368	NAV1
7341.54	HSD17B6	7.16108	SOX17	-6604	PAX7	8.11096e-05	PIK3R3	962	DUSP1	0.333333	SLC4A7	0.0137343	SLC4A7
7338.99	VWF	7.16095	TMEM245	-6604	SOX17	8.1103e-05	SREBF2	962	DVL3	0.333333	NPL	0.0137327	NPL
7337.79	IRF1	7.16062	BNC1	-6604	TMEM245	8.1103e-05	BRAF	962	TNFRSF25	0.333333	SPRY4	0.0137315	SPRY4
7336.64	HSP90AB1	7.15738	ATG7	-6604	BNC1	8.1103e-05	ICAM1	962	VDR	0.333333	TIMP1	0.0137308	TIMP1
7335.56	DUSP10	7.15736	DAPK2	-6604	ATG7	8.1103e-05	FZD7	962	AEBP1	0.333333	BAG3	0.0137302	BAG3
7335.13	ALDH7A1	7.15631	CAPN3	-6604	DAPK2	8.1103e-05	COL3A1	962	VDAC1	0.333333	STIP1	0.0137277	STIP1
7334.14	TRIB2	7.15593	GPX2	-6604	CAPN3	8.10964e-05	LRP8	961	RBM26	0.333333	ADAMTS5	0.0137188	ADAMTS5
7332.53	ARL15	7.15579	TMEM179B	-6604	GPX2	8.10964e-05	ACACB	961	PDSS2	0.333333	PGM2	0.0137186	PGM2
7329.4	PTPN2	7.15559	STAMBPL1	-6604	TMEM179B	8.10964e-05	HMGN2	961	SOX11	0.333333	BCL2A1	0.0137177	BCL2A1
7326.71	ALPL	7.15363	NEURL1B	-6604	STAMBPL1	8.10964e-05	FAM107A	961	MOB3B	0.333333	AHSG	0.0137165	AHSG
7326.42	C6	7.15344	MPZ	-6604	NEURL1B	8.10964e-05	ZNF638	961	CDK20	0.333333	RPS6KA3	0.0137145	RPS6KA3
7318.49	SEMA3D	7.15317	RBP1	-6604	MPZ	8.10964e-05	ATP2B4	961	E2F8	0.333333	NFKBIZ	0.0137131	NFKBIZ
7307.14	NR1H3	7.15245	PDYN	-6604	RBP1	8.10964e-05	SMARCA4	961	GAD1	0.333333	ARHGDIB	0.0137131	ARHGDIB
7307.08	DROSHA	7.15177	PJA1	-6604	PDYN	8.10898e-05	ATXN7L1	961	FZD7	0.333333	DDB1	0.0137012	DDB1
7306.75	TRIM21	7.15176	CETN3	-6604	PJA1	8.10898e-05	DEGS1	961	HMGN2	0.333333	TOR1B	0.013701	TOR1B
7299.91	PSMD12	7.1517	CABP1	-6604	CETN3	8.10898e-05	PEA15	960	ZFPM2	0.333333	GPA33	0.013696	GPA33
7299.31	MPG	7.15136	ARHGEF28	-6604	CABP1	8.10898e-05	GREM2	960	CDC37	0.333333	SALL4	0.0136954	SALL4
7293.16	EIF4A3	7.15048	SLC6A17	-6604	ARHGEF28	8.10898e-05	ADGRF5	960	ETS2	0.333333	PPIB	0.0136896	PPIB
7292.17	LAD1	7.15046	CD151	-6604	SLC6A17	8.10898e-05	S100A10	959	MDM1	0.333333	SAT1	0.0136861	SAT1
7289.74	AURKB	7.14864	ADORA2B	-6604	CD151	8.10898e-05	STC1	959	SRI	0.333333	ASXL2	0.0136848	ASXL2
7285.17	RGN	7.14851	APOO	-6604	ADORA2B	8.10898e-05	MSN	959	ABCB4	0.333333	MBOAT7	0.0136821	MBOAT7
7277.63	TRAF6	7.14821	IL10	-6604	APOO	8.10898e-05	APEX1	959	SLC4A1	0.333333	GAS1	0.0136739	GAS1
7275.3	CEBPZ	7.14811	ABHD3	-6604	IL10	8.10898e-05	CASP1	958	COMMD1	0.333333	HEPACAM	0.0136738	HEPACAM
7273.18	HSPE1	7.14809	TMEM229B	-6604	ABHD3	8.10833e-05	PIM2	958	SETMAR	0.333333	MNAT1	0.0136682	MNAT1
7272.66	SNRPE	7.14596	RASGRP2	-6604	TMEM229B	8.10767e-05	CHD2	958	SLC44A1	0.333333	EXT2	0.0136641	EXT2
7271.74	PLEKHF2	7.14321	IMP3	-6604	RASGRP2	8.10701e-05	TK1	958	GRN	0.333333	CTTNBP2NL	0.0136573	CTTNBP2NL
7267.9	GCNT1	7.14256	NIF3L1	-6604	IMP3	8.10701e-05	SALL4	958	S100A10	0.333333	SCFD2	0.0136572	SCFD2
7265.72	PDCD10	7.14242	NLRP12	-6604	NIF3L1	8.10701e-05	GCLM	958	TRIM27	0.333333	DUSP1	0.0136514	DUSP1
7264.86	PRKCB	7.13945	GOPC	-6604	NLRP12	8.10701e-05	PDIA3	958	TPX2	0.333333	NUMB	0.013649	NUMB
7264.53	AGO2	7.13923	HDAC7	-6604	GOPC	8.10636e-05	ACOX2	957	FOCAD	0.333333	STX3	0.0136474	STX3
7258.87	HMGA2	7.13913	HOXA11	-6604	HDAC7	8.10636e-05	SPRY4	957	COX8A	0.333333	PARPBP	0.0136442	PARPBP
7255.42	DVL3	7.13856	SCMH1	-6604	HOXA11	8.10636e-05	ORC1	957	LY96	0.333333	ITGB2	0.0136432	ITGB2
7247.45	STOM	7.13856	GGH	-6604	SCMH1	8.10636e-05	HSPB1	956	ABI3BP	0.333333	IGFBP5	0.0136364	IGFBP5
7244.76	ITPKA	7.13754	OSBPL5	-6604	GGH	8.10636e-05	MYO6	956	MDN1	0.333333	HPGD	0.0136347	HPGD
7243.43	XPO5	7.13712	DYRK4	-6604	OSBPL5	8.10636e-05	KDELR3	956	PHYH	0.333333	FAM107A	0.0136342	FAM107A
7243.28	RCAN1	7.13623	COX15	-6604	DYRK4	8.10636e-05	CEBPZ	956	TTC3	0.333333	SOBP	0.0136339	SOBP
7239.54	HNRNPL	7.13615	TPMT	-6604	COX15	8.10636e-05	FSTL1	956	PTPN21	0.333333	FGB	0.013633	FGB
7236.79	GALNT12	7.13614	EVI2A	-6604	TPMT	8.1057e-05	GATA1	956	SERPINF2	0.333333	PSMB8	0.0136307	PSMB8
7236.74	RPL12	7.13604	DAAM2	-6604	EVI2A	8.1057e-05	TP53BP1	955	ERCC4	0.333333	EML4	0.0136303	EML4
7234.71	PLD3	7.13422	HMBOX1	-6604	DAAM2	8.1057e-05	NET1	955	PLEKHA6	0.333333	RAP2A	0.0136288	RAP2A
7228.75	PRCP	7.13283	CD82	-6604	HMBOX1	8.1057e-05	RNF114	955	NUCB2	0.333333	GALNT12	0.0136285	GALNT12
7227.71	BLNK	7.13258	RTN4RL1	-6604	CD82	8.1057e-05	GPX3	954	MAD1L1	0.333333	TUBA4A	0.0136273	TUBA4A
7227.43	CRTAP	7.13237	TINAGL1	-6604	RTN4RL1	8.1057e-05	CREB1	954	GCNT1	0.333333	LRP8	0.0136264	LRP8
7224.31	HSD3B1	7.13235	PDE4A	-6604	TINAGL1	8.10504e-05	PRCP	954	ING1	0.333333	ITGB6	0.013614	ITGB6
7222.53	ADGRB1	7.13217	APPBP2	-6604	PDE4A	8.10504e-05	CDC37	953	NPTN	0.333333	LHFPL3	0.0136118	LHFPL3
7220.9	ADRA1A	7.13162	WT1	-6604	APPBP2	8.10504e-05	WHSC1L1	953	DHX38	0.333333	FNBP4	0.0136081	FNBP4
7219.42	PTPA	7.13112	NFKBIE	-6604	WT1	8.10504e-05	PREX1	953	ASAP2	0.333333	ID3	0.0135979	ID3
7217	AKAP12	7.13101	MBNL3	-6604	NFKBIE	8.10504e-05	NR1D2	952	ZNF281	0.333333	FLVCR2	0.0135958	FLVCR2
7216.09	SMG6	7.1309	FSHB	-6604	MBNL3	8.10504e-05	ANTXR2	952	MBOAT7	0.333333	ROCK2	0.0135936	ROCK2
7213.96	DLST	7.13077	SRRM2	-6604	FSHB	8.10504e-05	LUM	952	KIAA0040	0.333333	BAZ1A	0.0135917	BAZ1A
7210.07	GCLC	7.1299	LRRK2	-6604	SRRM2	8.10438e-05	ADCYAP1	952	CCL19	0.333333	THSD4	0.0135825	THSD4
7208.29	GSE1	7.12984	DDB2	-6604	LRRK2	8.10438e-05	OLFML2A	952	EIF3B	0.333333	SKAP2	0.0135793	SKAP2
7208.03	MSH6	7.12971	SLC39A10	-6604	DDB2	8.10438e-05	RANBP2	951	ARID1B	0.333333	CCDC6	0.0135792	CCDC6
7205.55	BMPR2	7.12865	FGG	-6604	SLC39A10	8.10438e-05	WAPL	951	NETO2	0.333333	DVL3	0.0135739	DVL3
7199.95	PSMC3	7.12815	GDNF	-6604	FGG	8.10438e-05	RFC2	951	C6	0.333333	COL21A1	0.0135738	COL21A1
7198.97	TSC2	7.12799	IL32	-6604	GDNF	8.10373e-05	PNP	951	SCG2	0.333333	ATP8B1	0.0135703	ATP8B1
7198.28	GRIK2	7.12751	ATL2	-6604	IL32	8.10373e-05	CTSD	951	TRIM22	0.333333	CEP85L	0.0135671	CEP85L
7197.74	TP53BP1	7.12731	SLC2A12	-6604	ATL2	8.10373e-05	LAMB2	950	ARID2	0.333333	BTD	0.013564	BTD
7197.73	BMPR1A	7.12709	DPH2	-6604	SLC2A12	8.10373e-05	CRYAB	950	ID3	0.333333	EEF1A1	0.0135626	EEF1A1
7196.47	TNFSF13B	7.12554	DNAJC16	-6604	DPH2	8.10373e-05	MTHFD1	950	IGFBP5	0.333333	SNX10	0.0135613	SNX10
7190.31	MYBL2	7.12511	CX3CL1	-6604	DNAJC16	8.10373e-05	CDK5	950	RBL1	0.333333	IMPA2	0.0135603	IMPA2
7190.19	PRPF8	7.12437	NANS	-6604	CX3CL1	8.10373e-05	OPA1	949	PMAIP1	0.333333	DSG2	0.0135601	DSG2
7189.48	FCGR2B	7.12353	B4GALNT1	-6604	NANS	8.10373e-05	ST18	949	OS9	0.333333	NKTR	0.0135593	NKTR
7188.88	ANP32A	7.12345	CRMP1	-6604	B4GALNT1	8.10373e-05	ETS2	949	STC1	0.333333	PAMR1	0.0135561	PAMR1
7178.9	PLAUR	7.12329	TSHZ1	-6604	CRMP1	8.10373e-05	SFPQ	949	EXT2	0.333333	ACADM	0.0135561	ACADM
7176.31	PIWIL1	7.12308	GTF2A1	-6604	TSHZ1	8.10307e-05	UBE2S	949	CDK9	0.333333	OMD	0.0135546	OMD
7175.72	CAD	7.12281	JAG2	-6604	GTF2A1	8.10307e-05	BBOX1	949	RPL12	0.333333	ZFP42	0.0135496	ZFP42
7171.32	ASH2L	7.12256	DTYMK	-6604	JAG2	8.10307e-05	TRIM27	948	SYNPO	0.333333	PLAUR	0.0135454	PLAUR
7170.66	SGCE	7.1215	XCL2	-6604	DTYMK	8.10307e-05	PCBD1	948	SALL2	0.333333	ENG	0.0135392	ENG
7167.2	NFE2L1	7.12147	ASL	-6604	XCL2	8.10307e-05	PLAGL1	948	TBC1D9	0.333333	ARG2	0.013537	ARG2
7165.45	GPX1	7.12115	GGCT	-6604	ASL	8.10307e-05	RAD52	948	SLC25A5	0.333333	SMARCA4	0.0135355	SMARCA4
7165.09	PXDC1	7.12068	PTPN18	-6604	GGCT	8.10307e-05	C6	948	HLA-DPB1	0.333333	MMP15	0.0135353	MMP15
7162.58	FGF2	7.12065	TLR1	-6604	PTPN18	8.10307e-05	FGB	947	FAM107A	0.333333	FUBP1	0.0135308	FUBP1
7161.48	PTPRE	7.12034	GPC1	-6604	TLR1	8.10307e-05	LY96	947	CD69	0.333333	HNRNPL	0.0135304	HNRNPL
7159.27	FAM107A	7.11944	KIAA1549L	-6604	GPC1	8.10307e-05	SLC25A5	947	ITGAL	0.333333	HRAS	0.0135262	HRAS
7157.58	PLAGL1	7.1183	SPHK2	-6604	KIAA1549L	8.10307e-05	ARRDC3	946	SCMH1	0.333333	PEA15	0.0135244	PEA15
7153.4	COL9A1	7.11765	CRIP2	-6604	SPHK2	8.10307e-05	DUSP1	946	HMGA2	0.333333	H2AFX	0.0135219	H2AFX
7148.47	NFASC	7.11734	PPP1R1B	-6604	CRIP2	8.10307e-05	UBE2D1	946	GAB1	0.333333	JADE1	0.0135193	JADE1
7147.74	APEX1	7.11672	ZNF165	-6604	PPP1R1B	8.10307e-05	OLFM1	946	HNRNPC	0.333333	PDK3	0.0135186	PDK3
7146.19	VSTM4	7.11598	TNFSF13	-6604	ZNF165	8.10307e-05	RAC1	945	KCNH8	0.333333	CD86	0.0135185	CD86
7144	KDM5C	7.11564	GSTA1	-6604	TNFSF13	8.10241e-05	LZTR1	945	RNLS	0.333333	CUX2	0.0135104	CUX2
7143.92	RBM25	7.11503	SLC22A8	-6604	GSTA1	8.10241e-05	FSHB	945	PXDC1	0.333333	NOS1	0.013507	NOS1
7138.6	GART	7.11475	ICAM3	-6604	SLC22A8	8.10241e-05	PALMD	945	KDELR3	0.333333	P2RX4	0.0135032	P2RX4
7138.09	GPX3	7.11364	ST3GAL4	-6604	ICAM3	8.10241e-05	GSTA4	945	CTSD	0.333333	PHF20L1	0.013501	PHF20L1
7137.86	EPHA1	7.11326	SREBF2	-6604	ST3GAL4	8.10241e-05	GOT1	945	MAP4K1	0.333333	ABI2	0.0135007	ABI2
7136.17	RAMP3	7.11318	WRB	-6604	SREBF2	8.10241e-05	ID3	945	SQSTM1	0.333333	ADGRE5	0.0134976	ADGRE5
7132.94	TNFRSF8	7.11223	PHF21A	-6604	WRB	8.10241e-05	DVL3	944	SMG1	0.333333	RAC1	0.0134928	RAC1
7132.59	UPF1	7.11125	FOSL1	-6604	PHF21A	8.10176e-05	PDCL3	944	JCHAIN	0.333333	TFPI	0.0134888	TFPI
7131.44	SOSTDC1	7.11115	FAR2	-6604	FOSL1	8.10176e-05	GPR137B	944	KBTBD11	0.333333	PRCP	0.0134886	PRCP
7130.92	MEX3B	7.1103	FREM1	-6604	FAR2	8.10176e-05	TRIM33	944	DPF1	0.333333	MAOB	0.0134815	MAOB
7125.5	ABCB4	7.11004	BZW2	-6604	FREM1	8.10176e-05	FCGR2B	944	MTHFD1	0.333333	PHYH	0.0134802	PHYH
7122.62	VOPP1	7.10601	GDF15	-6604	BZW2	8.1011e-05	PHLDB1	944	RHOG	0.333333	RTN3	0.0134792	RTN3
7119.19	FXYD3	7.10554	HAUS1	-6604	GDF15	8.1011e-05	TMEM109	943	SRGAP1	0.333333	CIT	0.0134781	CIT
7114.96	JCHAIN	7.10551	GOLGA2	-6604	HAUS1	8.1011e-05	CD86	943	FAAH	0.333333	CEBPZ	0.0134746	CEBPZ
7113.91	GDF15	7.10419	PFKL	-6604	GOLGA2	8.1011e-05	BNIP3L	943	RGL1	0.333333	EIF4EBP2	0.0134718	EIF4EBP2
7111.4	IGFBP6	7.10386	BHLHE41	-6604	PFKL	8.1011e-05	DPYSL3	943	MAP4	0.333333	DDAH1	0.013471	DDAH1
7108.75	VEZF1	7.10238	EPHB4	-6604	BHLHE41	8.10045e-05	TDRD3	943	ST18	0.333333	ACSM3	0.0134697	ACSM3
7107.89	DEGS1	7.1017	TSLP	-6604	EPHB4	8.10045e-05	PGM1	943	HSPE1	0.333333	XDH	0.0134652	XDH
7105.43	C11orf71	7.10125	CYP2S1	-6604	TSLP	8.10045e-05	ARG2	942	C11orf71	0.333333	FH	0.0134642	FH
7103.65	CDC42BPA	7.10015	ABCD2	-6604	CYP2S1	8.10045e-05	PTGER3	942	ST3GAL4	0.333333	TUBA1C	0.0134609	TUBA1C
7098.74	LMOD1	7.10011	NAT2	-6604	ABCD2	8.10045e-05	TNFRSF25	942	SLC25A36	0.333333	HSD17B6	0.0134607	HSD17B6
7097.84	GRK3	7.10002	PFDN4	-6604	NAT2	8.10045e-05	USP15	942	DIP2A	0.333333	BIN1	0.0134571	BIN1
7090.64	HDAC5	7.0995	UCP2	-6604	PFDN4	8.10045e-05	PRELP	942	LRP8	0.333333	UBE2D1	0.0134549	UBE2D1
7086.85	ATXN7L1	7.09923	PRKCDBP	-6604	UCP2	8.10045e-05	RAN	942	BAZ1A	0.333333	UGT2B7	0.0134534	UGT2B7
7083.8	CDH19	7.09872	PHLDA2	-6604	PRKCDBP	8.10045e-05	NPM1	942	SAT1	0.333333	GPM6B	0.0134499	GPM6B
7078.04	CDK18	7.0977	HSPB3	-6604	PHLDA2	8.10045e-05	RFC4	942	CFH	0.333333	CENPE	0.0134472	CENPE
7072.9	GPRC5A	7.09671	TROAP	-6604	HSPB3	8.09979e-05	GALNT12	942	NDUFV2	0.333333	PPP1R3C	0.013439	PPP1R3C
7071.77	TTLL11	7.09661	MYH6	-6604	TROAP	8.09979e-05	CD69	942	CENPA	0.333333	RBPMS	0.0134332	RBPMS
7069.95	ETV5	7.09658	TRIP6	-6604	MYH6	8.09979e-05	OMD	941	SLC25A1	0.333333	FABP4	0.0134326	FABP4
7069.22	STK17B	7.09651	NKAIN1	-6604	TRIP6	8.09979e-05	ARAF	941	UGGT2	0.333333	TDRD3	0.0134321	TDRD3
7067.45	THSD4	7.09611	HRC	-6604	NKAIN1	8.09979e-05	GNRHR	941	ATRN	0.333333	IRF1	0.0134299	IRF1
7066.96	VDR	7.09595	SLC25A43	-6604	HRC	8.09979e-05	SCG2	941	ACACB	0.333333	EPHX2	0.0134296	EPHX2
7061.06	TKT	7.09513	HIST1H3H	-6604	SLC25A43	8.09979e-05	EEPD1	941	SALL4	0.333333	ABCC5	0.0134252	ABCC5
7057.38	LSM2	7.09507	CDA	-6604	HIST1H3H	8.09979e-05	CA12	941	PREX1	0.333333	ELF1	0.0134247	ELF1
7056.82	CPN2	7.09483	GPRC5C	-6604	CDA	8.09979e-05	TOR1AIP1	941	RRM2	0.333333	PDK4	0.0134236	PDK4
7055.67	FOS	7.09469	DHCR24	-6604	GPRC5C	8.09979e-05	PIK3CG	941	NOV	0.333333	RARA	0.0134235	RARA
7050.43	SLC44A1	7.09465	HIF1AN	-6604	DHCR24	8.09913e-05	CCL19	940	ADGRF5	0.333333	CDK20	0.013415	CDK20
7046.32	SART1	7.09465	TOR1B	-6604	HIF1AN	8.09913e-05	SH2D4A	940	CD86	0.333333	NFASC	0.0134134	NFASC
7042.88	EML4	7.09324	PHOSPHO2	-6604	TOR1B	8.09913e-05	PIGK	940	LAMA5	0.333333	APLP1	0.0134091	APLP1
7039.68	GLS	7.09213	STX1A	-6604	PHOSPHO2	8.09913e-05	FH	940	MAPK13	0.333333	SLC4A1	0.0134064	SLC4A1
7038.52	KCNH1	7.09135	F2	-6604	STX1A	8.09848e-05	SLC2A9	940	TCF3	0.333333	SYNJ1	0.0134048	SYNJ1
7034.02	SLC25A5	7.09129	ENTPD5	-6604	F2	8.09848e-05	DROSHA	939	LAMB2	0.333333	TMEM109	0.0134013	TMEM109
7033.96	CDKN1B	7.09055	GPSM2	-6604	ENTPD5	8.09848e-05	HSP90AB1	939	BBOX1	0.333333	BACE1	0.0133979	BACE1
7033.66	RERG	7.09037	PLD2	-6604	GPSM2	8.09848e-05	PSME4	939	BNIP3L	0.333333	AIG1	0.0133946	AIG1
7032.95	CA9	7.08986	SELPLG	-6604	PLD2	8.09848e-05	ITGB5	939	OMD	0.333333	SMARCA1	0.0133939	SMARCA1
7032.75	SH3BP5	7.08807	S100A6	-6604	SELPLG	8.09782e-05	PLEKHF2	939	TYK2	0.333333	UBR3	0.0133917	UBR3
7027.45	MFAP1	7.08759	CCL7	-6604	S100A6	8.09782e-05	PLCG1	939	CASP4	0.333333	KLF10	0.0133912	KLF10
7026.44	PDE2A	7.08717	CAPN6	-6604	CCL7	8.09782e-05	KDM5B	939	HDAC5	0.333333	CLDN10	0.0133806	CLDN10
7026.09	FLNC	7.08711	BRMS1L	-6604	CAPN6	8.09782e-05	FGFR1	939	NCF2	0.333333	UNC50	0.0133791	UNC50
7023.39	PERP	7.08649	ZNF827	-6604	BRMS1L	8.09717e-05	TYK2	939	THBS1	0.333333	TSHR	0.0133788	TSHR
7020.6	APAF1	7.08644	SESN1	-6604	ZNF827	8.09717e-05	TMEM168	938	SMOC2	0.333333	ZNRF1	0.0133635	ZNRF1
7019.43	CCDC88A	7.08584	DGKE	-6604	SESN1	8.09717e-05	GLI2	938	ALOX12	0.333333	TMEM176B	0.0133584	TMEM176B
7019.37	EXOC2	7.08573	NOL3	-6604	DGKE	8.09717e-05	EML4	938	PRCP	0.333333	GSC	0.0133572	GSC
[truncated: 4,607 more rows]
