# Supplementary material for: Integrating Multi-Omics Analysis for Enhanced Diagnosis and Treatment of Glioblastoma: A Comprehensive Data-Driven Approach
Source: Preprints.org preprint supplement (doi:10.20944/preprints202303.0355.v1), 2023-03-20
Supplement: Supplementary file 23 [file Supplementary Table 5.xlsx]

## Sheet: Sheet1
UBC	ubiquitin C [Source:HGNC Symbol;Acc:HGNC:12468]
APP	amyloid beta precursor protein [Source:HGNC Symbol;Acc:HGNC:620]
FN1	fibronectin 1 [Source:HGNC Symbol;Acc:HGNC:3778]
KCNIP4	potassium voltage-gated channel interacting protein 4 [Source:HGNC Symbol;Acc:HGNC:30083]
AUTS2	autism susceptibility candidate 2 [Source:HGNC Symbol;Acc:HGNC:14262]
CAST	calpastatin [Source:HGNC Symbol;Acc:HGNC:1515]
NTRK2	neurotrophic receptor tyrosine kinase 2 [Source:HGNC Symbol;Acc:HGNC:8032]
CELF2	CUGBP, Elav-like family member 2 [Source:HGNC Symbol;Acc:HGNC:2550]
CDH13	cadherin 13 [Source:HGNC Symbol;Acc:HGNC:1753]
DAB1	DAB1, reelin adaptor protein [Source:HGNC Symbol;Acc:HGNC:2661]
RBFOX1	RNA binding protein, fox-1 homolog 1 [Source:HGNC Symbol;Acc:HGNC:18222]
RDX	radixin [Source:HGNC Symbol;Acc:HGNC:9944]
NFIA	nuclear factor I A [Source:HGNC Symbol;Acc:HGNC:7784]
EGFR	epidermal growth factor receptor [Source:HGNC Symbol;Acc:HGNC:3236]
FOXP1	forkhead box P1 [Source:HGNC Symbol;Acc:HGNC:3823]
MUC1	mucin 1, cell surface associated [Source:HGNC Symbol;Acc:HGNC:7508]
TCF4	transcription factor 4 [Source:HGNC Symbol;Acc:HGNC:11634]
NFIB	nuclear factor I B [Source:HGNC Symbol;Acc:HGNC:7785]
PPP3CA	protein phosphatase 3 catalytic subunit alpha [Source:HGNC Symbol;Acc:HGNC:9314]
DAPK1	death associated protein kinase 1 [Source:HGNC Symbol;Acc:HGNC:2674]
SMIM10L2A	small integral membrane protein 10 like 2A [Source:HGNC Symbol;Acc:HGNC:34499]
ZFP57	ZFP57 zinc finger protein [Source:HGNC Symbol;Acc:HGNC:18791]
UGT2B17	UDP glucuronosyltransferase family 2 member B17 [Source:HGNC Symbol;Acc:HGNC:12547]
TDRP	testis development related protein [Source:HGNC Symbol;Acc:HGNC:26951]
IL31	interleukin 31 [Source:HGNC Symbol;Acc:HGNC:19372]
UGT8	UDP glycosyltransferase 8 [Source:HGNC Symbol;Acc:HGNC:12555]
MRPL23	mitochondrial ribosomal protein L23 [Source:HGNC Symbol;Acc:HGNC:10322]
COX6B2	cytochrome c oxidase subunit 6B2 [Source:HGNC Symbol;Acc:HGNC:24380]
XRRA1	X-ray radiation resistance associated 1 [Source:HGNC Symbol;Acc:HGNC:18868]
UGT2B15	UDP glucuronosyltransferase family 2 member B15 [Source:HGNC Symbol;Acc:HGNC:12546]
RPL41	ribosomal protein L41 [Source:HGNC Symbol;Acc:HGNC:10354]
CMTM1	CKLF like MARVEL transmembrane domain containing 1 [Source:HGNC Symbol;Acc:HGNC:19172]
KCNK18	potassium two pore domain channel subfamily K member 18 [Source:HGNC Symbol;Acc:HGNC:19439]
UGT1A8	UDP glucuronosyltransferase family 1 member A8 [Source:HGNC Symbol;Acc:HGNC:12540]
UBAP1L	ubiquitin associated protein 1 like [Source:HGNC Symbol;Acc:HGNC:40028]
PLK5	polo like kinase 5 [Source:HGNC Symbol;Acc:HGNC:27001]
DNAH1	dynein axonemal heavy chain 1 [Source:HGNC Symbol;Acc:HGNC:2940]
UGT1A10	UDP glucuronosyltransferase family 1 member A10 [Source:HGNC Symbol;Acc:HGNC:12531]
SPSB4	splA/ryanodine receptor domain and SOCS box containing 4 [Source:HGNC Symbol;Acc:HGNC:30630]
IL27	interleukin 27 [Source:HGNC Symbol;Acc:HGNC:19157]
LUZP6	leucine zipper protein 6 [Source:HGNC Symbol;Acc:HGNC:33955]
PLXDC2	plexin domain containing 2 [Source:HGNC Symbol;Acc:HGNC:21013]
IQGAP2	IQ motif containing GTPase activating protein 2 [Source:HGNC Symbol;Acc:HGNC:6111]
JUN	Jun proto-oncogene, AP-1 transcription factor subunit [Source:HGNC Symbol;Acc:HGNC:6204]
CTNNB1	catenin beta 1 [Source:HGNC Symbol;Acc:HGNC:2514]
PIK3R1	phosphoinositide-3-kinase regulatory subunit 1 [Source:HGNC Symbol;Acc:HGNC:8979]
XPO1	exportin 1 [Source:HGNC Symbol;Acc:HGNC:12825]
SETBP1	SET binding protein 1 [Source:HGNC Symbol;Acc:HGNC:15573]
