# Supplementary material for: Integrating Multi-Omics Analysis for Enhanced Diagnosis and Treatment of Glioblastoma: A Comprehensive Data-Driven Approach
Source: Preprints.org preprint supplement (doi:10.20944/preprints202303.0355.v1), 2023-03-20
Supplement: Supplementary file 24 [file Supplementary Table 6.xlsx]

## Sheet: Sheet1
final gene list related to 86 signaling pathway and 3 lit based data-glioblastmoa
VEGFA	vascular endothelial growth factor A [Source:HGNC Symbol;Acc:HGNC:12680]
KDR	kinase insert domain receptor [Source:HGNC Symbol;Acc:HGNC:6307]
SH2D2A	SH2 domain containing 2A [Source:HGNC Symbol;Acc:HGNC:10821]
PLCG1	phospholipase C gamma 1 [Source:HGNC Symbol;Acc:HGNC:9065]
PLCG2	phospholipase C gamma 2 [Source:HGNC Symbol;Acc:HGNC:9066]
PRKCA	protein kinase C alpha [Source:HGNC Symbol;Acc:HGNC:9393]
PRKCB	protein kinase C beta [Source:HGNC Symbol;Acc:HGNC:9395]
PRKCG	protein kinase C gamma [Source:HGNC Symbol;Acc:HGNC:9402]
SPHK1	sphingosine kinase 1 [Source:HGNC Symbol;Acc:HGNC:11240]
SPHK2	sphingosine kinase 2 [Source:HGNC Symbol;Acc:HGNC:18859]
HRAS	Harvey rat sarcoma viral oncogene homolog [Source:HGNC Symbol;Acc:HGNC:5173]
KRAS	KRAS proto-oncogene, GTPase [Source:HGNC Symbol;Acc:HGNC:6407]
NRAS	neuroblastoma RAS viral oncogene homolog [Source:HGNC Symbol;Acc:HGNC:7989]
RAF1	Raf-1 proto-oncogene, serine/threonine kinase [Source:HGNC Symbol;Acc:HGNC:9829]
MAP2K1	mitogen-activated protein kinase kinase 1 [Source:HGNC Symbol;Acc:HGNC:6840]
MAP2K2	mitogen-activated protein kinase kinase 2 [Source:HGNC Symbol;Acc:HGNC:6842]
MAPK1	mitogen-activated protein kinase 1 [Source:HGNC Symbol;Acc:HGNC:6871]
MAPK3	mitogen-activated protein kinase 3 [Source:HGNC Symbol;Acc:HGNC:6877]
PLA2G4E	phospholipase A2 group IVE [Source:HGNC Symbol;Acc:HGNC:24791]
PLA2G4A	phospholipase A2 group IVA [Source:HGNC Symbol;Acc:HGNC:9035]
JMJD7-PLA2G4B	JMJD7-PLA2G4B readthrough [Source:HGNC Symbol;Acc:HGNC:34449]
PLA2G4B	phospholipase A2 group IVB [Source:HGNC Symbol;Acc:HGNC:9036]
PLA2G4C	phospholipase A2 group IVC [Source:HGNC Symbol;Acc:HGNC:9037]
PLA2G4D	phospholipase A2 group IVD [Source:HGNC Symbol;Acc:HGNC:30038]
PLA2G4F	phospholipase A2 group IVF [Source:HGNC Symbol;Acc:HGNC:27396]
PPP3CA	protein phosphatase 3 catalytic subunit alpha [Source:HGNC Symbol;Acc:HGNC:9314]
PPP3CB	protein phosphatase 3 catalytic subunit beta [Source:HGNC Symbol;Acc:HGNC:9315]
PPP3CC	protein phosphatase 3 catalytic subunit gamma [Source:HGNC Symbol;Acc:HGNC:9316]
PPP3R1	protein phosphatase 3 regulatory subunit B, alpha [Source:HGNC Symbol;Acc:HGNC:9317]
PPP3R2	protein phosphatase 3 regulatory subunit B, beta [Source:HGNC Symbol;Acc:HGNC:9318]
NFATC2	nuclear factor of activated T-cells 2 [Source:HGNC Symbol;Acc:HGNC:7776]
PTGS2	prostaglandin-endoperoxide synthase 2 [Source:HGNC Symbol;Acc:HGNC:9605]
PTK2	protein tyrosine kinase 2 [Source:HGNC Symbol;Acc:HGNC:9611]
SHC2	SHC adaptor protein 2 [Source:HGNC Symbol;Acc:HGNC:29869]
PXN	paxillin [Source:HGNC Symbol;Acc:HGNC:9718]
CDC42	cell division cycle 42 [Source:HGNC Symbol;Acc:HGNC:1736]
MAPK11	mitogen-activated protein kinase 11 [Source:HGNC Symbol;Acc:HGNC:6873]
MAPK12	mitogen-activated protein kinase 12 [Source:HGNC Symbol;Acc:HGNC:6874]
MAPK13	mitogen-activated protein kinase 13 [Source:HGNC Symbol;Acc:HGNC:6875]
MAPK14	mitogen-activated protein kinase 14 [Source:HGNC Symbol;Acc:HGNC:6876]
MAPKAPK2	mitogen-activated protein kinase-activated protein kinase 2 [Source:HGNC Symbol;Acc:HGNC:6887]
MAPKAPK3	mitogen-activated protein kinase-activated protein kinase 3 [Source:HGNC Symbol;Acc:HGNC:6888]
HSPB1	heat shock protein family B (small) member 1 [Source:HGNC Symbol;Acc:HGNC:5246]
SRC	SRC proto-oncogene, non-receptor tyrosine kinase [Source:HGNC Symbol;Acc:HGNC:11283]
PIK3CA	phosphatidylinositol-4,5-bisphosphate 3-kinase catalytic subunit alpha [Source:HGNC Symbol;Acc:HGNC:8975]
PIK3CD	phosphatidylinositol-4,5-bisphosphate 3-kinase catalytic subunit delta [Source:HGNC Symbol;Acc:HGNC:8977]
PIK3CB	phosphatidylinositol-4,5-bisphosphate 3-kinase catalytic subunit beta [Source:HGNC Symbol;Acc:HGNC:8976]
PIK3R1	phosphoinositide-3-kinase regulatory subunit 1 [Source:HGNC Symbol;Acc:HGNC:8979]
PIK3R2	phosphoinositide-3-kinase regulatory subunit 2 [Source:HGNC Symbol;Acc:HGNC:8980]
PIK3R3	phosphoinositide-3-kinase regulatory subunit 3 [Source:HGNC Symbol;Acc:HGNC:8981]
RAC1	ras-related C3 botulinum toxin substrate 1 (rho family, small GTP binding protein Rac1) [Source:HGNC Symbol;Acc:HGNC:9801]
RAC2	ras-related C3 botulinum toxin substrate 2 (rho family, small GTP binding protein Rac2) [Source:HGNC Symbol;Acc:HGNC:9802]
RAC3	ras-related C3 botulinum toxin substrate 3 (rho family, small GTP binding protein Rac3) [Source:HGNC Symbol;Acc:HGNC:9803]
AKT1	AKT serine/threonine kinase 1 [Source:HGNC Symbol;Acc:HGNC:391]
AKT2	AKT serine/threonine kinase 2 [Source:HGNC Symbol;Acc:HGNC:392]
AKT3	AKT serine/threonine kinase 3 [Source:HGNC Symbol;Acc:HGNC:393]
NOS3	nitric oxide synthase 3 [Source:HGNC Symbol;Acc:HGNC:7876]
CASP9	caspase 9 [Source:HGNC Symbol;Acc:HGNC:1511]
BAD	BCL2 associated agonist of cell death [Source:HGNC Symbol;Acc:HGNC:936]
EGF	epidermal growth factor [Source:HGNC Symbol;Acc:HGNC:3229]
TGFA	transforming growth factor alpha [Source:HGNC Symbol;Acc:HGNC:11765]
EREG	epiregulin [Source:HGNC Symbol;Acc:HGNC:3443]
AREG	amphiregulin [Source:HGNC Symbol;Acc:HGNC:651]
FGF1	fibroblast growth factor 1 [Source:HGNC Symbol;Acc:HGNC:3665]
FGF2	fibroblast growth factor 2 [Source:HGNC Symbol;Acc:HGNC:3676]
FGF3	fibroblast growth factor 3 [Source:HGNC Symbol;Acc:HGNC:3681]
FGF4	fibroblast growth factor 4 [Source:HGNC Symbol;Acc:HGNC:3682]
FGF17	fibroblast growth factor 17 [Source:HGNC Symbol;Acc:HGNC:3673]
FGF6	fibroblast growth factor 6 [Source:HGNC Symbol;Acc:HGNC:3684]
FGF7	fibroblast growth factor 7 [Source:HGNC Symbol;Acc:HGNC:3685]
FGF8	fibroblast growth factor 8 [Source:HGNC Symbol;Acc:HGNC:3686]
FGF9	fibroblast growth factor 9 [Source:HGNC Symbol;Acc:HGNC:3687]
FGF10	fibroblast growth factor 10 [Source:HGNC Symbol;Acc:HGNC:3666]
FGF16	fibroblast growth factor 16 [Source:HGNC Symbol;Acc:HGNC:3672]
FGF5	fibroblast growth factor 5 [Source:HGNC Symbol;Acc:HGNC:3683]
FGF18	fibroblast growth factor 18 [Source:HGNC Symbol;Acc:HGNC:3674]
FGF20	fibroblast growth factor 20 [Source:HGNC Symbol;Acc:HGNC:3677]
FGF22	fibroblast growth factor 22 [Source:HGNC Symbol;Acc:HGNC:3679]
FGF19	fibroblast growth factor 19 [Source:HGNC Symbol;Acc:HGNC:3675]
FGF21	fibroblast growth factor 21 [Source:HGNC Symbol;Acc:HGNC:3678]
FGF23	fibroblast growth factor 23 [Source:HGNC Symbol;Acc:HGNC:3680]
NGF	nerve growth factor [Source:HGNC Symbol;Acc:HGNC:7808]
BDNF	brain derived neurotrophic factor [Source:HGNC Symbol;Acc:HGNC:1033]
NTF3	neurotrophin 3 [Source:HGNC Symbol;Acc:HGNC:8023]
NTF4	neurotrophin 4 [Source:HGNC Symbol;Acc:HGNC:8024]
INS	insulin [Source:HGNC Symbol;Acc:HGNC:6081]
IGF1	insulin like growth factor 1 [Source:HGNC Symbol;Acc:HGNC:5464]
IGF2	insulin like growth factor 2 [Source:HGNC Symbol;Acc:HGNC:5466]
PDGFA	platelet derived growth factor subunit A [Source:HGNC Symbol;Acc:HGNC:8799]
PDGFB	platelet derived growth factor subunit B [Source:HGNC Symbol;Acc:HGNC:8800]
PDGFC	platelet derived growth factor C [Source:HGNC Symbol;Acc:HGNC:8801]
PDGFD	platelet derived growth factor D [Source:HGNC Symbol;Acc:HGNC:30620]
CSF1	colony stimulating factor 1 [Source:HGNC Symbol;Acc:HGNC:2432]
KITLG	KIT ligand [Source:HGNC Symbol;Acc:HGNC:6343]
FLT3LG	fms related tyrosine kinase 3 ligand [Source:HGNC Symbol;Acc:HGNC:3766]
VEGFB	vascular endothelial growth factor B [Source:HGNC Symbol;Acc:HGNC:12681]
PGF	placental growth factor [Source:HGNC Symbol;Acc:HGNC:8893]
VEGFC	vascular endothelial growth factor C [Source:HGNC Symbol;Acc:HGNC:12682]
VEGFD	vascular endothelial growth factor D [Source:HGNC Symbol;Acc:HGNC:3708]
HGF	hepatocyte growth factor [Source:HGNC Symbol;Acc:HGNC:4893]
ANGPT1	angiopoietin 1 [Source:HGNC Symbol;Acc:HGNC:484]
ANGPT2	angiopoietin 2 [Source:HGNC Symbol;Acc:HGNC:485]
ANGPT4	angiopoietin 4 [Source:HGNC Symbol;Acc:HGNC:487]
EFNA1	ephrin A1 [Source:HGNC Symbol;Acc:HGNC:3221]
EFNA2	ephrin A2 [Source:HGNC Symbol;Acc:HGNC:3222]
EFNA3	ephrin A3 [Source:HGNC Symbol;Acc:HGNC:3223]
EFNA4	ephrin A4 [Source:HGNC Symbol;Acc:HGNC:3224]
EFNA5	ephrin A5 [Source:HGNC Symbol;Acc:HGNC:3225]
EGFR	epidermal growth factor receptor [Source:HGNC Symbol;Acc:HGNC:3236]
ERBB2	erb-b2 receptor tyrosine kinase 2 [Source:HGNC Symbol;Acc:HGNC:3430]
ERBB3	erb-b2 receptor tyrosine kinase 3 [Source:HGNC Symbol;Acc:HGNC:3431]
ERBB4	erb-b2 receptor tyrosine kinase 4 [Source:HGNC Symbol;Acc:HGNC:3432]
FGFR1	fibroblast growth factor receptor 1 [Source:HGNC Symbol;Acc:HGNC:3688]
FGFR2	fibroblast growth factor receptor 2 [Source:HGNC Symbol;Acc:HGNC:3689]
FGFR3	fibroblast growth factor receptor 3 [Source:HGNC Symbol;Acc:HGNC:3690]
FGFR4	fibroblast growth factor receptor 4 [Source:HGNC Symbol;Acc:HGNC:3691]
NGFR	nerve growth factor receptor [Source:HGNC Symbol;Acc:HGNC:7809]
NTRK1	neurotrophic receptor tyrosine kinase 1 [Source:HGNC Symbol;Acc:HGNC:8031]
NTRK2	neurotrophic receptor tyrosine kinase 2 [Source:HGNC Symbol;Acc:HGNC:8032]
INSR	insulin receptor [Source:HGNC Symbol;Acc:HGNC:6091]
IGF1R	insulin like growth factor 1 receptor [Source:HGNC Symbol;Acc:HGNC:5465]
PDGFRA	platelet derived growth factor receptor alpha [Source:HGNC Symbol;Acc:HGNC:8803]
PDGFRB	platelet derived growth factor receptor beta [Source:HGNC Symbol;Acc:HGNC:8804]
CSF1R	colony stimulating factor 1 receptor [Source:HGNC Symbol;Acc:HGNC:2433]
KIT	KIT proto-oncogene receptor tyrosine kinase [Source:HGNC Symbol;Acc:HGNC:6342]
FLT3	fms related tyrosine kinase 3 [Source:HGNC Symbol;Acc:HGNC:3765]
FLT1	fms related tyrosine kinase 1 [Source:HGNC Symbol;Acc:HGNC:3763]
FLT4	fms related tyrosine kinase 4 [Source:HGNC Symbol;Acc:HGNC:3767]
MET	MET proto-oncogene, receptor tyrosine kinase [Source:HGNC Symbol;Acc:HGNC:7029]
TEK	TEK receptor tyrosine kinase [Source:HGNC Symbol;Acc:HGNC:11724]
EPHA2	EPH receptor A2 [Source:HGNC Symbol;Acc:HGNC:3386]
GRB2	growth factor receptor bound protein 2 [Source:HGNC Symbol;Acc:HGNC:4566]
SOS1	SOS Ras/Rac guanine nucleotide exchange factor 1 [Source:HGNC Symbol;Acc:HGNC:11187]
SOS2	SOS Ras/Rho guanine nucleotide exchange factor 2 [Source:HGNC Symbol;Acc:HGNC:11188]
IRS1	insulin receptor substrate 1 [Source:HGNC Symbol;Acc:HGNC:6125]
TLR2	toll like receptor 2 [Source:HGNC Symbol;Acc:HGNC:11848]
TLR4	toll like receptor 4 [Source:HGNC Symbol;Acc:HGNC:11850]
SYK	spleen tyrosine kinase [Source:HGNC Symbol;Acc:HGNC:11491]
CD19	CD19 molecule [Source:HGNC Symbol;Acc:HGNC:1633]
PIK3AP1	phosphoinositide-3-kinase adaptor protein 1 [Source:HGNC Symbol;Acc:HGNC:30034]
GH1	growth hormone 1 [Source:HGNC Symbol;Acc:HGNC:4261]
GH2	growth hormone 2 [Source:HGNC Symbol;Acc:HGNC:4262]
CSH1	chorionic somatomammotropin hormone 1 [Source:HGNC Symbol;Acc:HGNC:2440]
CSH2	chorionic somatomammotropin hormone 2 [Source:HGNC Symbol;Acc:HGNC:2441]
PRL	prolactin [Source:HGNC Symbol;Acc:HGNC:9445]
OSM	oncostatin M [Source:HGNC Symbol;Acc:HGNC:8506]
IL2	interleukin 2 [Source:HGNC Symbol;Acc:HGNC:6001]
IL3	interleukin 3 [Source:HGNC Symbol;Acc:HGNC:6011]
IL6	interleukin 6 [Source:HGNC Symbol;Acc:HGNC:6018]
IL4	interleukin 4 [Source:HGNC Symbol;Acc:HGNC:6014]
IL7	interleukin 7 [Source:HGNC Symbol;Acc:HGNC:6023]
IFNA1	interferon, alpha 1 [Source:HGNC Symbol;Acc:HGNC:5417]
IFNA2	interferon, alpha 2 [Source:HGNC Symbol;Acc:HGNC:5423]
IFNA4	interferon, alpha 4 [Source:HGNC Symbol;Acc:HGNC:5425]
IFNA5	interferon alpha 5 [Source:HGNC Symbol;Acc:HGNC:5426]
IFNA6	interferon alpha 6 [Source:HGNC Symbol;Acc:HGNC:5427]
IFNA7	interferon, alpha 7 [Source:HGNC Symbol;Acc:HGNC:5428]
IFNA8	interferon alpha 8 [Source:HGNC Symbol;Acc:HGNC:5429]
IFNA10	interferon, alpha 10 [Source:HGNC Symbol;Acc:HGNC:5418]
IFNA13	interferon, alpha 13 [Source:HGNC Symbol;Acc:HGNC:5419]
IFNA14	interferon alpha 14 [Source:HGNC Symbol;Acc:HGNC:5420]
IFNA16	interferon, alpha 16 [Source:HGNC Symbol;Acc:HGNC:5421]
IFNA17	interferon, alpha 17 [Source:HGNC Symbol;Acc:HGNC:5422]
IFNA21	interferon, alpha 21 [Source:HGNC Symbol;Acc:HGNC:5424]
IFNB1	interferon beta 1 [Source:HGNC Symbol;Acc:HGNC:5434]
EPO	erythropoietin [Source:HGNC Symbol;Acc:HGNC:3415]
CSF3	colony stimulating factor 3 [Source:HGNC Symbol;Acc:HGNC:2438]
GHR	growth hormone receptor [Source:HGNC Symbol;Acc:HGNC:4263]
PRLR	prolactin receptor [Source:HGNC Symbol;Acc:HGNC:9446]
OSMR	oncostatin M receptor [Source:HGNC Symbol;Acc:HGNC:8507]
IL2RA	interleukin 2 receptor subunit alpha [Source:HGNC Symbol;Acc:HGNC:6008]
IL2RB	interleukin 2 receptor subunit beta [Source:HGNC Symbol;Acc:HGNC:6009]
IL2RG	interleukin 2 receptor subunit gamma [Source:HGNC Symbol;Acc:HGNC:6010]
IL3RA	interleukin 3 receptor subunit alpha [Source:HGNC Symbol;Acc:HGNC:6012]
IL6R	interleukin 6 receptor [Source:HGNC Symbol;Acc:HGNC:6019]
IL4R	interleukin 4 receptor [Source:HGNC Symbol;Acc:HGNC:6015]
IL7R	interleukin 7 receptor [Source:HGNC Symbol;Acc:HGNC:6024]
IFNAR1	interferon alpha and beta receptor subunit 1 [Source:HGNC Symbol;Acc:HGNC:5432]
IFNAR2	interferon alpha and beta receptor subunit 2 [Source:HGNC Symbol;Acc:HGNC:5433]
EPOR	erythropoietin receptor [Source:HGNC Symbol;Acc:HGNC:3416]
CSF3R	colony stimulating factor 3 receptor [Source:HGNC Symbol;Acc:HGNC:2439]
JAK1	Janus kinase 1 [Source:HGNC Symbol;Acc:HGNC:6190]
JAK2	Janus kinase 2 [Source:HGNC Symbol;Acc:HGNC:6192]
JAK3	Janus kinase 3 [Source:HGNC Symbol;Acc:HGNC:6193]
COL1A1	collagen type I alpha 1 [Source:HGNC Symbol;Acc:HGNC:2197]
COL1A2	collagen type I alpha 2 chain [Source:HGNC Symbol;Acc:HGNC:2198]
COL2A1	collagen type II alpha 1 chain [Source:HGNC Symbol;Acc:HGNC:2200]
COL4A2	collagen type IV alpha 2 [Source:HGNC Symbol;Acc:HGNC:2203]
COL4A4	collagen type IV alpha 4 chain [Source:HGNC Symbol;Acc:HGNC:2206]
COL4A6	collagen type IV alpha 6 chain [Source:HGNC Symbol;Acc:HGNC:2208]
COL4A1	collagen type IV alpha 1 chain [Source:HGNC Symbol;Acc:HGNC:2202]
COL4A5	collagen type IV alpha 5 chain [Source:HGNC Symbol;Acc:HGNC:2207]
COL4A3	collagen type IV alpha 3 chain [Source:HGNC Symbol;Acc:HGNC:2204]
COL6A1	collagen type VI alpha 1 [Source:HGNC Symbol;Acc:HGNC:2211]
COL6A2	collagen type VI alpha 2 [Source:HGNC Symbol;Acc:HGNC:2212]
COL6A3	collagen type VI alpha 3 chain [Source:HGNC Symbol;Acc:HGNC:2213]
COL6A6	collagen type VI alpha 6 [Source:HGNC Symbol;Acc:HGNC:27023]
COL6A5	collagen type VI alpha 5 [Source:HGNC Symbol;Acc:HGNC:26674]
COL9A1	collagen type IX alpha 1 [Source:HGNC Symbol;Acc:HGNC:2217]
COL9A2	collagen type IX alpha 2 [Source:HGNC Symbol;Acc:HGNC:2218]
COL9A3	collagen type IX alpha 3 [Source:HGNC Symbol;Acc:HGNC:2219]
LAMA1	laminin subunit alpha 1 [Source:HGNC Symbol;Acc:HGNC:6481]
LAMA2	laminin subunit alpha 2 [Source:HGNC Symbol;Acc:HGNC:6482]
LAMA3	laminin subunit alpha 3 [Source:HGNC Symbol;Acc:HGNC:6483]
LAMA5	laminin subunit alpha 5 [Source:HGNC Symbol;Acc:HGNC:6485]
LAMA4	laminin subunit alpha 4 [Source:HGNC Symbol;Acc:HGNC:6484]
LAMB1	laminin subunit beta 1 [Source:HGNC Symbol;Acc:HGNC:6486]
LAMB2	laminin subunit beta 2 [Source:HGNC Symbol;Acc:HGNC:6487]
LAMB3	laminin subunit beta 3 [Source:HGNC Symbol;Acc:HGNC:6490]
LAMB4	laminin subunit beta 4 [Source:HGNC Symbol;Acc:HGNC:6491]
LAMC1	laminin subunit gamma 1 [Source:HGNC Symbol;Acc:HGNC:6492]
LAMC2	laminin subunit gamma 2 [Source:HGNC Symbol;Acc:HGNC:6493]
LAMC3	laminin subunit gamma 3 [Source:HGNC Symbol;Acc:HGNC:6494]
CHAD	chondroadherin [Source:HGNC Symbol;Acc:HGNC:1909]
RELN	reelin [Source:HGNC Symbol;Acc:HGNC:9957]
THBS1	thrombospondin 1 [Source:HGNC Symbol;Acc:HGNC:11785]
COMP	cartilage oligomeric matrix protein [Source:HGNC Symbol;Acc:HGNC:2227]
THBS2	thrombospondin 2 [Source:HGNC Symbol;Acc:HGNC:11786]
THBS3	thrombospondin 3 [Source:HGNC Symbol;Acc:HGNC:11787]
THBS4	thrombospondin 4 [Source:HGNC Symbol;Acc:HGNC:11788]
FN1	fibronectin 1 [Source:HGNC Symbol;Acc:HGNC:3778]
SPP1	secreted phosphoprotein 1 [Source:HGNC Symbol;Acc:HGNC:11255]
VTN	vitronectin [Source:HGNC Symbol;Acc:HGNC:12724]
TNC	tenascin C [Source:HGNC Symbol;Acc:HGNC:5318]
TNN	tenascin N [Source:HGNC Symbol;Acc:HGNC:22942]
TNR	tenascin R [Source:HGNC Symbol;Acc:HGNC:11953]
TNXB	tenascin XB [Source:HGNC Symbol;Acc:HGNC:11976]
VWF	von Willebrand factor [Source:HGNC Symbol;Acc:HGNC:12726]
IBSP	integrin binding sialoprotein [Source:HGNC Symbol;Acc:HGNC:5341]
ITGA1	integrin subunit alpha 1 [Source:HGNC Symbol;Acc:HGNC:6134]
ITGA2	integrin subunit alpha 2 [Source:HGNC Symbol;Acc:HGNC:6137]
ITGA2B	integrin subunit alpha 2b [Source:HGNC Symbol;Acc:HGNC:6138]
ITGA3	integrin subunit alpha 3 [Source:HGNC Symbol;Acc:HGNC:6139]
ITGA4	integrin subunit alpha 4 [Source:HGNC Symbol;Acc:HGNC:6140]
ITGA5	integrin subunit alpha 5 [Source:HGNC Symbol;Acc:HGNC:6141]
ITGA6	integrin subunit alpha 6 [Source:HGNC Symbol;Acc:HGNC:6142]
ITGA7	integrin subunit alpha 7 [Source:HGNC Symbol;Acc:HGNC:6143]
ITGA8	integrin subunit alpha 8 [Source:HGNC Symbol;Acc:HGNC:6144]
ITGA9	integrin subunit alpha 9 [Source:HGNC Symbol;Acc:HGNC:6145]
ITGA10	integrin subunit alpha 10 [Source:HGNC Symbol;Acc:HGNC:6135]
ITGA11	integrin subunit alpha 11 [Source:HGNC Symbol;Acc:HGNC:6136]
ITGAV	integrin subunit alpha V [Source:HGNC Symbol;Acc:HGNC:6150]
ITGB1	integrin subunit beta 1 [Source:HGNC Symbol;Acc:HGNC:6153]
ITGB3	integrin subunit beta 3 [Source:HGNC Symbol;Acc:HGNC:6156]
ITGB4	integrin subunit beta 4 [Source:HGNC Symbol;Acc:HGNC:6158]
ITGB5	integrin subunit beta 5 [Source:HGNC Symbol;Acc:HGNC:6160]
ITGB6	integrin subunit beta 6 [Source:HGNC Symbol;Acc:HGNC:6161]
ITGB7	integrin subunit beta 7 [Source:HGNC Symbol;Acc:HGNC:6162]
ITGB8	integrin subunit beta 8 [Source:HGNC Symbol;Acc:HGNC:6163]
F2R	coagulation factor II thrombin receptor [Source:HGNC Symbol;Acc:HGNC:3537]
CHRM1	cholinergic receptor muscarinic 1 [Source:HGNC Symbol;Acc:HGNC:1950]
CHRM2	cholinergic receptor muscarinic 2 [Source:HGNC Symbol;Acc:HGNC:1951]
LPAR1	lysophosphatidic acid receptor 1 [Source:HGNC Symbol;Acc:HGNC:3166]
LPAR2	lysophosphatidic acid receptor 2 [Source:HGNC Symbol;Acc:HGNC:3168]
LPAR3	lysophosphatidic acid receptor 3 [Source:HGNC Symbol;Acc:HGNC:14298]
LPAR4	lysophosphatidic acid receptor 4 [Source:HGNC Symbol;Acc:HGNC:4478]
LPAR5	lysophosphatidic acid receptor 5 [Source:HGNC Symbol;Acc:HGNC:13307]
LPAR6	lysophosphatidic acid receptor 6 [Source:HGNC Symbol;Acc:HGNC:15520]
GNB1	G protein subunit beta 1 [Source:HGNC Symbol;Acc:HGNC:4396]
GNB2	G protein subunit beta 2 [Source:HGNC Symbol;Acc:HGNC:4398]
GNB3	G protein subunit beta 3 [Source:HGNC Symbol;Acc:HGNC:4400]
GNB4	G protein subunit beta 4 [Source:HGNC Symbol;Acc:HGNC:20731]
GNB5	G protein subunit beta 5 [Source:HGNC Symbol;Acc:HGNC:4401]
GNG2	G protein subunit gamma 2 [Source:HGNC Symbol;Acc:HGNC:4404]
GNG3	G protein subunit gamma 3 [Source:HGNC Symbol;Acc:HGNC:4405]
GNG4	G protein subunit gamma 4 [Source:HGNC Symbol;Acc:HGNC:4407]
GNG5	G protein subunit gamma 5 [Source:HGNC Symbol;Acc:HGNC:4408]
GNG7	G protein subunit gamma 7 [Source:HGNC Symbol;Acc:HGNC:4410]
GNG8	G protein subunit gamma 8 [Source:HGNC Symbol;Acc:HGNC:19664]
GNG10	G protein subunit gamma 10 [Source:HGNC Symbol;Acc:HGNC:4402]
GNG11	G protein subunit gamma 11 [Source:HGNC Symbol;Acc:HGNC:4403]
GNG12	G protein subunit gamma 12 [Source:HGNC Symbol;Acc:HGNC:19663]
GNG13	G protein subunit gamma 13 [Source:HGNC Symbol;Acc:HGNC:14131]
GNGT1	G protein subunit gamma transducin 1 [Source:HGNC Symbol;Acc:HGNC:4411]
GNGT2	G protein subunit gamma transducin 2 [Source:HGNC Symbol;Acc:HGNC:4412]
PIK3CG	phosphatidylinositol-4,5-bisphosphate 3-kinase catalytic subunit gamma [Source:HGNC Symbol;Acc:HGNC:8978]
PIK3R5	phosphoinositide-3-kinase regulatory subunit 5 [Source:HGNC Symbol;Acc:HGNC:30035]
PIK3R6	phosphoinositide-3-kinase regulatory subunit 6 [Source:HGNC Symbol;Acc:HGNC:27101]
PDPK1	3-phosphoinositide dependent protein kinase 1 [Source:HGNC Symbol;Acc:HGNC:8816]
STK11	serine/threonine kinase 11 [Source:HGNC Symbol;Acc:HGNC:11389]
PRKAA1	protein kinase AMP-activated catalytic subunit alpha 1 [Source:HGNC Symbol;Acc:HGNC:9376]
PRKAA2	protein kinase AMP-activated catalytic subunit alpha 2 [Source:HGNC Symbol;Acc:HGNC:9377]
DDIT4	DNA damage inducible transcript 4 [Source:HGNC Symbol;Acc:HGNC:24944]
TSC1	tuberous sclerosis 1 [Source:HGNC Symbol;Acc:HGNC:12362]
TSC2	tuberous sclerosis 2 [Source:HGNC Symbol;Acc:HGNC:12363]
RHEB	Ras homolog enriched in brain [Source:HGNC Symbol;Acc:HGNC:10011]
MLST8	MTOR associated protein, LST8 homolog [Source:HGNC Symbol;Acc:HGNC:24825]
MTOR	mechanistic target of rapamycin [Source:HGNC Symbol;Acc:HGNC:3942]
RPTOR	regulatory associated protein of MTOR complex 1 [Source:HGNC Symbol;Acc:HGNC:30287]
EIF4EBP1	eukaryotic translation initiation factor 4E binding protein 1 [Source:HGNC Symbol;Acc:HGNC:3288]
EIF4E	eukaryotic translation initiation factor 4E [Source:HGNC Symbol;Acc:HGNC:3287]
EIF4E2	eukaryotic translation initiation factor 4E family member 2 [Source:HGNC Symbol;Acc:HGNC:3293]
EIF4E1B	eukaryotic translation initiation factor 4E family member 1B [Source:HGNC Symbol;Acc:HGNC:33179]
RPS6KB1	ribosomal protein S6 kinase B1 [Source:HGNC Symbol;Acc:HGNC:10436]
RPS6KB2	ribosomal protein S6 kinase B2 [Source:HGNC Symbol;Acc:HGNC:10437]
EIF4B	eukaryotic translation initiation factor 4B [Source:HGNC Symbol;Acc:HGNC:3285]
RPS6	ribosomal protein S6 [Source:HGNC Symbol;Acc:HGNC:10429]
PKN1	protein kinase N1 [Source:HGNC Symbol;Acc:HGNC:9405]
PKN2	protein kinase N2 [Source:HGNC Symbol;Acc:HGNC:9406]
PKN3	protein kinase N3 [Source:HGNC Symbol;Acc:HGNC:17999]
SGK1	serum/glucocorticoid regulated kinase 1 [Source:HGNC Symbol;Acc:HGNC:10810]
SGK2	SGK2, serine/threonine kinase 2 [Source:HGNC Symbol;Acc:HGNC:13900]
SGK3	serum/glucocorticoid regulated kinase family member 3 [Source:HGNC Symbol;Acc:HGNC:10812]
C8orf44-SGK3	C8orf44-SGK3 readthrough [Source:HGNC Symbol;Acc:HGNC:48354]
MAGI1	membrane associated guanylate kinase, WW and PDZ domain containing 1 [Source:HGNC Symbol;Acc:HGNC:946]
MAGI2	membrane associated guanylate kinase, WW and PDZ domain containing 2 [Source:HGNC Symbol;Acc:HGNC:18957]
PTEN	phosphatase and tensin homolog [Source:HGNC Symbol;Acc:HGNC:9588]
THEM4	thioesterase superfamily member 4 [Source:HGNC Symbol;Acc:HGNC:17947]
PPP2CA	protein phosphatase 2 catalytic subunit alpha [Source:HGNC Symbol;Acc:HGNC:9299]
PPP2CB	protein phosphatase 2 catalytic subunit beta [Source:HGNC Symbol;Acc:HGNC:9300]
PPP2R1B	protein phosphatase 2 scaffold subunit Abeta [Source:HGNC Symbol;Acc:HGNC:9303]
PPP2R1A	protein phosphatase 2 scaffold subunit Aalpha [Source:HGNC Symbol;Acc:HGNC:9302]
PPP2R2A	protein phosphatase 2 regulatory subunit Balpha [Source:HGNC Symbol;Acc:HGNC:9304]
PPP2R2B	protein phosphatase 2 regulatory subunit Bbeta [Source:HGNC Symbol;Acc:HGNC:9305]
PPP2R2C	protein phosphatase 2 regulatory subunit Bgamma [Source:HGNC Symbol;Acc:HGNC:9306]
PPP2R2D	protein phosphatase 2 regulatory subunit Bdelta [Source:HGNC Symbol;Acc:HGNC:23732]
PPP2R3B	protein phosphatase 2 regulatory subunit B''beta [Source:HGNC Symbol;Acc:HGNC:13417]
PPP2R3C	protein phosphatase 2 regulatory subunit B''gamma [Source:HGNC Symbol;Acc:HGNC:17485]
PPP2R3A	protein phosphatase 2 regulatory subunit B''alpha [Source:HGNC Symbol;Acc:HGNC:9307]
PPP2R5B	protein phosphatase 2 regulatory subunit B'beta [Source:HGNC Symbol;Acc:HGNC:9310]
PPP2R5C	protein phosphatase 2 regulatory subunit B'gamma [Source:HGNC Symbol;Acc:HGNC:9311]
PPP2R5D	protein phosphatase 2 regulatory subunit B'delta [Source:HGNC Symbol;Acc:HGNC:9312]
PPP2R5E	protein phosphatase 2 regulatory subunit B'epsilon [Source:HGNC Symbol;Acc:HGNC:9313]
PPP2R5A	protein phosphatase 2 regulatory subunit B'alpha [Source:HGNC Symbol;Acc:HGNC:9309]
HSP90AA1	heat shock protein 90kDa alpha family class A member 1 [Source:HGNC Symbol;Acc:HGNC:5253]
HSP90AB1	heat shock protein 90kDa alpha family class B member 1 [Source:HGNC Symbol;Acc:HGNC:5258]
HSP90B1	heat shock protein 90kDa beta family member 1 [Source:HGNC Symbol;Acc:HGNC:12028]
CDC37	cell division cycle 37 [Source:HGNC Symbol;Acc:HGNC:1735]
CRTC2	CREB regulated transcription coactivator 2 [Source:HGNC Symbol;Acc:HGNC:27301]
PHLPP1	PH domain and leucine rich repeat protein phosphatase 1 [Source:HGNC Symbol;Acc:HGNC:20610]
PHLPP2	PH domain and leucine rich repeat protein phosphatase 2 [Source:HGNC Symbol;Acc:HGNC:29149]
TCL1A	T-cell leukemia/lymphoma 1A [Source:HGNC Symbol;Acc:HGNC:11648]
TCL1B	T-cell leukemia/lymphoma 1B [Source:HGNC Symbol;Acc:HGNC:11649]
MTCP1	mature T-cell proliferation 1 [Source:HGNC Symbol;Acc:HGNC:7423]
BRCA1	BRCA1, DNA repair associated [Source:HGNC Symbol;Acc:HGNC:1100]
GSK3B	glycogen synthase kinase 3 beta [Source:HGNC Symbol;Acc:HGNC:4617]
GYS2	glycogen synthase 2 [Source:HGNC Symbol;Acc:HGNC:4707]
GYS1	glycogen synthase 1 [Source:HGNC Symbol;Acc:HGNC:4706]
PCK1	phosphoenolpyruvate carboxykinase 1 [Source:HGNC Symbol;Acc:HGNC:8724]
PCK2	phosphoenolpyruvate carboxykinase 2, mitochondrial [Source:HGNC Symbol;Acc:HGNC:8725]
G6PC2	glucose-6-phosphatase catalytic subunit 2 [Source:HGNC Symbol;Acc:HGNC:28906]
G6PC3	glucose-6-phosphatase catalytic subunit 3 [Source:HGNC Symbol;Acc:HGNC:24861]
MYC	v-myc avian myelocytomatosis viral oncogene homolog [Source:HGNC Symbol;Acc:HGNC:7553]
CCND1	cyclin D1 [Source:HGNC Symbol;Acc:HGNC:1582]
CDKN1A	cyclin dependent kinase inhibitor 1A [Source:HGNC Symbol;Acc:HGNC:1784]
CDKN1B	cyclin dependent kinase inhibitor 1B [Source:HGNC Symbol;Acc:HGNC:1785]
CDK2	cyclin dependent kinase 2 [Source:HGNC Symbol;Acc:HGNC:1771]
CDK4	cyclin dependent kinase 4 [Source:HGNC Symbol;Acc:HGNC:1773]
CDK6	cyclin dependent kinase 6 [Source:HGNC Symbol;Acc:HGNC:1777]
CCND2	cyclin D2 [Source:HGNC Symbol;Acc:HGNC:1583]
CCND3	cyclin D3 [Source:HGNC Symbol;Acc:HGNC:1585]
CCNE1	cyclin E1 [Source:HGNC Symbol;Acc:HGNC:1589]
CCNE2	cyclin E2 [Source:HGNC Symbol;Acc:HGNC:1590]
FOXO3	forkhead box O3 [Source:HGNC Symbol;Acc:HGNC:3821]
RBL2	RB transcriptional corepressor like 2 [Source:HGNC Symbol;Acc:HGNC:9894]
FASLG	Fas ligand [Source:HGNC Symbol;Acc:HGNC:11936]
BCL2L11	BCL2 like 11 [Source:HGNC Symbol;Acc:HGNC:994]
YWHAZ	tyrosine 3-monooxygenase/tryptophan 5-monooxygenase activation protein zeta [Source:HGNC Symbol;Acc:HGNC:12855]
YWHAB	tyrosine 3-monooxygenase/tryptophan 5-monooxygenase activation protein beta [Source:HGNC Symbol;Acc:HGNC:12849]
YWHAQ	tyrosine 3-monooxygenase/tryptophan 5-monooxygenase activation protein theta [Source:HGNC Symbol;Acc:HGNC:12854]
YWHAE	tyrosine 3-monooxygenase/tryptophan 5-monooxygenase activation protein epsilon [Source:HGNC Symbol;Acc:HGNC:12851]
YWHAH	tyrosine 3-monooxygenase/tryptophan 5-monooxygenase activation protein eta [Source:HGNC Symbol;Acc:HGNC:12853]
YWHAG	tyrosine 3-monooxygenase/tryptophan 5-monooxygenase activation protein gamma [Source:HGNC Symbol;Acc:HGNC:12852]
BCL2L1	BCL2 like 1 [Source:HGNC Symbol;Acc:HGNC:992]
BCL2	B-cell CLL/lymphoma 2 [Source:HGNC Symbol;Acc:HGNC:990]
CREB1	cAMP responsive element binding protein 1 [Source:HGNC Symbol;Acc:HGNC:2345]
ATF2	activating transcription factor 2 [Source:HGNC Symbol;Acc:HGNC:784]
ATF4	activating transcription factor 4 [Source:HGNC Symbol;Acc:HGNC:786]
CREB3	cAMP responsive element binding protein 3 [Source:HGNC Symbol;Acc:HGNC:2347]
CREB3L1	cAMP responsive element binding protein 3 like 1 [Source:HGNC Symbol;Acc:HGNC:18856]
CREB3L2	cAMP responsive element binding protein 3 like 2 [Source:HGNC Symbol;Acc:HGNC:23720]
CREB3L3	cAMP responsive element binding protein 3 like 3 [Source:HGNC Symbol;Acc:HGNC:18855]
CREB3L4	cAMP responsive element binding protein 3 like 4 [Source:HGNC Symbol;Acc:HGNC:18854]
CREB5	cAMP responsive element binding protein 5 [Source:HGNC Symbol;Acc:HGNC:16844]
ATF6B	activating transcription factor 6 beta [Source:HGNC Symbol;Acc:HGNC:2349]
MCL1	myeloid cell leukemia 1 [Source:HGNC Symbol;Acc:HGNC:6943]
RXRA	retinoid X receptor alpha [Source:HGNC Symbol;Acc:HGNC:10477]
NR4A1	nuclear receptor subfamily 4 group A member 1 [Source:HGNC Symbol;Acc:HGNC:7980]
IKBKG	inhibitor of kappa light polypeptide gene enhancer in B-cells, kinase gamma [Source:HGNC Symbol;Acc:HGNC:5961]
CHUK	conserved helix-loop-helix ubiquitous kinase [Source:HGNC Symbol;Acc:HGNC:1974]
IKBKB	inhibitor of kappa light polypeptide gene enhancer in B-cells, kinase beta [Source:HGNC Symbol;Acc:HGNC:5960]
RELA	RELA proto-oncogene, NF-kB subunit [Source:HGNC Symbol;Acc:HGNC:9955]
NFKB1	nuclear factor kappa B subunit 1 [Source:HGNC Symbol;Acc:HGNC:7794]
MYB	MYB proto-oncogene, transcription factor [Source:HGNC Symbol;Acc:HGNC:7545]
MDM2	MDM2 proto-oncogene [Source:HGNC Symbol;Acc:HGNC:6973]
TP53	tumor protein p53 [Source:HGNC Symbol;Acc:HGNC:11998]
G6PC	glucose-6-phosphatase catalytic subunit [Source:HGNC Symbol;Acc:HGNC:4056]
GAB1	GRB2 associated binding protein 1 [Source:HGNC Symbol;Acc:HGNC:4066]
GAB2	GRB2 associated binding protein 2 [Source:HGNC Symbol;Acc:HGNC:14458]
SHC1	SHC adaptor protein 1 [Source:HGNC Symbol;Acc:HGNC:10840]
SHC3	SHC adaptor protein 3 [Source:HGNC Symbol;Acc:HGNC:18181]
SHC4	SHC adaptor protein 4 [Source:HGNC Symbol;Acc:HGNC:16743]
PTPN11	protein tyrosine phosphatase, non-receptor type 11 [Source:HGNC Symbol;Acc:HGNC:9644]
RASGRP1	RAS guanyl releasing protein 1 [Source:HGNC Symbol;Acc:HGNC:9878]
RASGRP2	RAS guanyl releasing protein 2 [Source:HGNC Symbol;Acc:HGNC:9879]
RASGRP3	RAS guanyl releasing protein 3 [Source:HGNC Symbol;Acc:HGNC:14545]
RASGRP4	RAS guanyl releasing protein 4 [Source:HGNC Symbol;Acc:HGNC:18958]
ZAP70	zeta chain of T cell receptor associated protein kinase 70kDa [Source:HGNC Symbol;Acc:HGNC:12858]
LAT	linker for activation of T-cells [Source:HGNC Symbol;Acc:HGNC:18874]
HTR7	5-hydroxytryptamine receptor 7 [Source:HGNC Symbol;Acc:HGNC:5302]
PRKACA	protein kinase cAMP-activated catalytic subunit alpha [Source:HGNC Symbol;Acc:HGNC:9380]
PRKACB	protein kinase cAMP-activated catalytic subunit beta [Source:HGNC Symbol;Acc:HGNC:9381]
PRKACG	protein kinase cAMP-activated catalytic subunit gamma [Source:HGNC Symbol;Acc:HGNC:9382]
RASGRF1	Ras protein specific guanine nucleotide releasing factor 1 [Source:HGNC Symbol;Acc:HGNC:9875]
RASGRF2	Ras protein specific guanine nucleotide releasing factor 2 [Source:HGNC Symbol;Acc:HGNC:9876]
GRIN1	glutamate ionotropic receptor NMDA type subunit 1 [Source:HGNC Symbol;Acc:HGNC:4584]
GRIN2A	glutamate ionotropic receptor NMDA type subunit 2A [Source:HGNC Symbol;Acc:HGNC:4585]
GRIN2B	glutamate ionotropic receptor NMDA type subunit 2B [Source:HGNC Symbol;Acc:HGNC:4586]
CALML3	calmodulin like 3 [Source:HGNC Symbol;Acc:HGNC:1452]
CALM2	calmodulin 2 (phosphorylase kinase, delta) [Source:HGNC Symbol;Acc:HGNC:1445]
CALM3	calmodulin 3 (phosphorylase kinase, delta) [Source:HGNC Symbol;Acc:HGNC:1449]
CALM1	calmodulin 1 (phosphorylase kinase, delta) [Source:HGNC Symbol;Acc:HGNC:1442]
CALML6	calmodulin like 6 [Source:HGNC Symbol;Acc:HGNC:24193]
CALML5	calmodulin like 5 [Source:HGNC Symbol;Acc:HGNC:18180]
CALML4	calmodulin like 4 [Source:HGNC Symbol;Acc:HGNC:18445]
MRAS	muscle RAS oncogene homolog [Source:HGNC Symbol;Acc:HGNC:7227]
RRAS	related RAS viral (r-ras) oncogene homolog [Source:HGNC Symbol;Acc:HGNC:10447]
RRAS2	related RAS viral (r-ras) oncogene homolog 2 [Source:HGNC Symbol;Acc:HGNC:17271]
NF1	neurofibromin 1 [Source:HGNC Symbol;Acc:HGNC:7765]
RASA1	RAS p21 protein activator 1 [Source:HGNC Symbol;Acc:HGNC:9871]
RASA2	RAS p21 protein activator 2 [Source:HGNC Symbol;Acc:HGNC:9872]
RASA3	RAS p21 protein activator 3 [Source:HGNC Symbol;Acc:HGNC:20331]
RASA4	RAS p21 protein activator 4 [Source:HGNC Symbol;Acc:HGNC:23181]
RASA4B	RAS p21 protein activator 4B [Source:HGNC Symbol;Acc:HGNC:35202]
SYNGAP1	synaptic Ras GTPase activating protein 1 [Source:HGNC Symbol;Acc:HGNC:11497]
RASAL1	RAS protein activator like 1 [Source:HGNC Symbol;Acc:HGNC:9873]
RASAL2	RAS protein activator like 2 [Source:HGNC Symbol;Acc:HGNC:9874]
RASAL3	RAS protein activator like 3 [Source:HGNC Symbol;Acc:HGNC:26129]
RASSF1	Ras association domain family member 1 [Source:HGNC Symbol;Acc:HGNC:9882]
RASSF5	Ras association domain family member 5 [Source:HGNC Symbol;Acc:HGNC:17609]
STK4	serine/threonine kinase 4 [Source:HGNC Symbol;Acc:HGNC:11408]
TIAM1	T-cell lymphoma invasion and metastasis 1 [Source:HGNC Symbol;Acc:HGNC:11805]
PAK1	p21 (RAC1) activated kinase 1 [Source:HGNC Symbol;Acc:HGNC:8590]
PAK2	p21 (RAC1) activated kinase 2 [Source:HGNC Symbol;Acc:HGNC:8591]
PAK3	p21 (RAC1) activated kinase 3 [Source:HGNC Symbol;Acc:HGNC:8592]
PAK4	p21 (RAC1) activated kinase 4 [Source:HGNC Symbol;Acc:HGNC:16059]
PAK5	p21 (RAC1) activated kinase 5 [Source:HGNC Symbol;Acc:HGNC:15916]
PAK6	p21 (RAC1) activated kinase 6 [Source:HGNC Symbol;Acc:HGNC:16061]
BUB1B-PAK6	BUB1B-PAK6 readthrough [Source:EntrezGene;Acc:106821730]
RHOA	ras homolog family member A [Source:HGNC Symbol;Acc:HGNC:667]
FOXO4	forkhead box O4 [Source:HGNC Symbol;Acc:HGNC:7139]
SHOC2	SHOC2, leucine rich repeat scaffold protein [Source:HGNC Symbol;Acc:HGNC:15454]
PLA1A	phospholipase A1 member A [Source:HGNC Symbol;Acc:HGNC:17661]
PLA2G10	phospholipase A2 group X [Source:HGNC Symbol;Acc:HGNC:9029]
PLA2G2D	phospholipase A2 group IID [Source:HGNC Symbol;Acc:HGNC:9033]
PLA2G2E	phospholipase A2 group IIE [Source:HGNC Symbol;Acc:HGNC:13414]
PLA2G3	phospholipase A2 group III [Source:HGNC Symbol;Acc:HGNC:17934]
PLA2G2F	phospholipase A2 group IIF [Source:HGNC Symbol;Acc:HGNC:30040]
PLA2G12A	phospholipase A2 group XIIA [Source:HGNC Symbol;Acc:HGNC:18554]
PLA2G12B	phospholipase A2 group XIIB [Source:HGNC Symbol;Acc:HGNC:18555]
PLA2G1B	phospholipase A2 group IB [Source:HGNC Symbol;Acc:HGNC:9030]
PLA2G5	phospholipase A2 group V [Source:HGNC Symbol;Acc:HGNC:9038]
PLA2G2A	phospholipase A2 group IIA [Source:HGNC Symbol;Acc:HGNC:9031]
PLA2G2C	phospholipase A2 group IIC [Source:HGNC Symbol;Acc:HGNC:9032]
PLA2G6	phospholipase A2 group VI [Source:HGNC Symbol;Acc:HGNC:9039]
ELK1	ELK1, ETS transcription factor [Source:HGNC Symbol;Acc:HGNC:3321]
ETS1	ETS proto-oncogene 1, transcription factor [Source:HGNC Symbol;Acc:HGNC:3488]
ETS2	ETS proto-oncogene 2, transcription factor [Source:HGNC Symbol;Acc:HGNC:3489]
BRAP	BRCA1 associated protein [Source:HGNC Symbol;Acc:HGNC:1099]
KSR1	kinase suppressor of ras 1 [Source:HGNC Symbol;Acc:HGNC:6465]
KSR2	kinase suppressor of ras 2 [Source:HGNC Symbol;Acc:HGNC:18610]
RAPGEF5	Rap guanine nucleotide exchange factor 5 [Source:HGNC Symbol;Acc:HGNC:16862]
RAP1A	RAP1A, member of RAS oncogene family [Source:HGNC Symbol;Acc:HGNC:9855]
RAP1B	RAP1B, member of RAS oncogene family [Source:HGNC Symbol;Acc:HGNC:9857]
RALGDS	ral guanine nucleotide dissociation stimulator [Source:HGNC Symbol;Acc:HGNC:9842]
RGL1	ral guanine nucleotide dissociation stimulator like 1 [Source:HGNC Symbol;Acc:HGNC:30281]
RGL2	ral guanine nucleotide dissociation stimulator like 2 [Source:HGNC Symbol;Acc:HGNC:9769]
RALA	RALA Ras like proto-oncogene A [Source:HGNC Symbol;Acc:HGNC:9839]
RALB	RALB Ras like proto-oncogene B [Source:HGNC Symbol;Acc:HGNC:9840]
MAPK8	mitogen-activated protein kinase 8 [Source:HGNC Symbol;Acc:HGNC:6881]
MAPK10	mitogen-activated protein kinase 10 [Source:HGNC Symbol;Acc:HGNC:6872]
MAPK9	mitogen-activated protein kinase 9 [Source:HGNC Symbol;Acc:HGNC:6886]
EXOC2	exocyst complex component 2 [Source:HGNC Symbol;Acc:HGNC:24968]
TBK1	TANK binding kinase 1 [Source:HGNC Symbol;Acc:HGNC:11584]
REL	REL proto-oncogene, NF-kB subunit [Source:HGNC Symbol;Acc:HGNC:9954]
PLD1	phospholipase D1 [Source:HGNC Symbol;Acc:HGNC:9067]
PLD2	phospholipase D2 [Source:HGNC Symbol;Acc:HGNC:9068]
RALBP1	ralA binding protein 1 [Source:HGNC Symbol;Acc:HGNC:9841]
PLCE1	phospholipase C epsilon 1 [Source:HGNC Symbol;Acc:HGNC:17175]
RIN1	Ras and Rab interactor 1 [Source:HGNC Symbol;Acc:HGNC:18749]
ABL1	ABL proto-oncogene 1, non-receptor tyrosine kinase [Source:HGNC Symbol;Acc:HGNC:76]
ABL2	ABL proto-oncogene 2, non-receptor tyrosine kinase [Source:HGNC Symbol;Acc:HGNC:77]
RAB5A	RAB5A, member RAS oncogene family [Source:HGNC Symbol;Acc:HGNC:9783]
RAB5B	RAB5B, member RAS oncogene family [Source:HGNC Symbol;Acc:HGNC:9784]
RAB5C	RAB5C, member RAS oncogene family [Source:HGNC Symbol;Acc:HGNC:9785]
ARF6	ADP ribosylation factor 6 [Source:HGNC Symbol;Acc:HGNC:659]
MLLT4	myeloid/lymphoid or mixed-lineage leukemia; translocated to, 4 [Source:HGNC Symbol;Acc:HGNC:7137]
PLA2G16	phospholipase A2 group XVI [Source:HGNC Symbol;Acc:HGNC:17825]
CHRD	chordin [Source:HGNC Symbol;Acc:HGNC:1949]
NOG	noggin [Source:HGNC Symbol;Acc:HGNC:7866]
NBL1	neuroblastoma 1, DAN family BMP antagonist [Source:HGNC Symbol;Acc:HGNC:7650]
GREM1	gremlin 1, DAN family BMP antagonist [Source:HGNC Symbol;Acc:HGNC:2001]
GREM2	gremlin 2, DAN family BMP antagonist [Source:HGNC Symbol;Acc:HGNC:17655]
DCN	decorin [Source:HGNC Symbol;Acc:HGNC:2705]
FMOD	fibromodulin [Source:HGNC Symbol;Acc:HGNC:3774]
LEFTY1	left-right determination factor 1 [Source:HGNC Symbol;Acc:HGNC:6552]
LEFTY2	left-right determination factor 2 [Source:HGNC Symbol;Acc:HGNC:3122]
FST	follistatin [Source:HGNC Symbol;Acc:HGNC:3971]
BMP2	bone morphogenetic protein 2 [Source:HGNC Symbol;Acc:HGNC:1069]
BMP4	bone morphogenetic protein 4 [Source:HGNC Symbol;Acc:HGNC:1071]
BMP6	bone morphogenetic protein 6 [Source:HGNC Symbol;Acc:HGNC:1073]
INHBB	inhibin beta B subunit [Source:HGNC Symbol;Acc:HGNC:6067]
BMP5	bone morphogenetic protein 5 [Source:HGNC Symbol;Acc:HGNC:1072]
BMP7	bone morphogenetic protein 7 [Source:HGNC Symbol;Acc:HGNC:1074]
BMP8B	bone morphogenetic protein 8b [Source:HGNC Symbol;Acc:HGNC:1075]
BMP8A	bone morphogenetic protein 8a [Source:HGNC Symbol;Acc:HGNC:21650]
GDF5	growth differentiation factor 5 [Source:HGNC Symbol;Acc:HGNC:4220]
GDF6	growth differentiation factor 6 [Source:HGNC Symbol;Acc:HGNC:4221]
GDF7	growth differentiation factor 7 [Source:HGNC Symbol;Acc:HGNC:4222]
AMH	anti-Mullerian hormone [Source:HGNC Symbol;Acc:HGNC:464]
THSD4	thrombospondin type 1 domain containing 4 [Source:HGNC Symbol;Acc:HGNC:25835]
FBN1	fibrillin 1 [Source:HGNC Symbol;Acc:HGNC:3603]
LTBP1	latent transforming growth factor beta binding protein 1 [Source:HGNC Symbol;Acc:HGNC:6714]
TGFB1	transforming growth factor beta 1 [Source:HGNC Symbol;Acc:HGNC:11766]
TGFB2	transforming growth factor beta 2 [Source:HGNC Symbol;Acc:HGNC:11768]
TGFB3	transforming growth factor beta 3 [Source:HGNC Symbol;Acc:HGNC:11769]
INHBA	inhibin beta A subunit [Source:HGNC Symbol;Acc:HGNC:6066]
INHBC	inhibin beta C subunit [Source:HGNC Symbol;Acc:HGNC:6068]
INHBE	inhibin beta E subunit [Source:HGNC Symbol;Acc:HGNC:24029]
NODAL	nodal growth differentiation factor [Source:HGNC Symbol;Acc:HGNC:7865]
NEO1	neogenin 1 [Source:HGNC Symbol;Acc:HGNC:7754]
HFE2	hemochromatosis type 2 (juvenile) [Source:HGNC Symbol;Acc:HGNC:4887]
BMPR1A	bone morphogenetic protein receptor type 1A [Source:HGNC Symbol;Acc:HGNC:1076]
BMPR1B	bone morphogenetic protein receptor type 1B [Source:HGNC Symbol;Acc:HGNC:1077]
ACVR1	activin A receptor type 1 [Source:HGNC Symbol;Acc:HGNC:171]
BMPR2	bone morphogenetic protein receptor type 2 [Source:HGNC Symbol;Acc:HGNC:1078]
ACVR2A	activin A receptor type 2A [Source:HGNC Symbol;Acc:HGNC:173]
RGMA	repulsive guidance molecule family member a [Source:HGNC Symbol;Acc:HGNC:30308]
RGMB	repulsive guidance molecule family member b [Source:HGNC Symbol;Acc:HGNC:26896]
AMHR2	anti-Mullerian hormone receptor type 2 [Source:HGNC Symbol;Acc:HGNC:465]
TGFBR1	transforming growth factor beta receptor 1 [Source:HGNC Symbol;Acc:HGNC:11772]
TGFBR2	transforming growth factor beta receptor 2 [Source:HGNC Symbol;Acc:HGNC:11773]
ACVR1B	activin A receptor type 1B [Source:HGNC Symbol;Acc:HGNC:172]
ACVR2B	activin A receptor type 2B [Source:HGNC Symbol;Acc:HGNC:174]
ACVR1C	activin A receptor type 1C [Source:HGNC Symbol;Acc:HGNC:18123]
BAMBI	BMP and activin membrane bound inhibitor [Source:HGNC Symbol;Acc:HGNC:30251]
SMAD1	SMAD family member 1 [Source:HGNC Symbol;Acc:HGNC:6767]
SMAD5	SMAD family member 5 [Source:HGNC Symbol;Acc:HGNC:6771]
SMAD9	SMAD family member 9 [Source:HGNC Symbol;Acc:HGNC:6774]
SMAD2	SMAD family member 2 [Source:HGNC Symbol;Acc:HGNC:6768]
SMAD3	SMAD family member 3 [Source:HGNC Symbol;Acc:HGNC:6769]
SMAD4	SMAD family member 4 [Source:HGNC Symbol;Acc:HGNC:6770]
SMAD6	SMAD family member 6 [Source:HGNC Symbol;Acc:HGNC:6772]
SMAD7	SMAD family member 7 [Source:HGNC Symbol;Acc:HGNC:6773]
SMURF1	SMAD specific E3 ubiquitin protein ligase 1 [Source:HGNC Symbol;Acc:HGNC:16807]
SMURF2	SMAD specific E3 ubiquitin protein ligase 2 [Source:HGNC Symbol;Acc:HGNC:16809]
ZFYVE9	zinc finger FYVE-type containing 9 [Source:HGNC Symbol;Acc:HGNC:6775]
ZFYVE16	zinc finger FYVE-type containing 16 [Source:HGNC Symbol;Acc:HGNC:20756]
HAMP	hepcidin antimicrobial peptide [Source:HGNC Symbol;Acc:HGNC:15598]
ID1	inhibitor of DNA binding 1, HLH protein [Source:HGNC Symbol;Acc:HGNC:5360]
ID2	inhibitor of DNA binding 2, HLH protein [Source:HGNC Symbol;Acc:HGNC:5361]
ID3	inhibitor of DNA binding 3, HLH protein [Source:HGNC Symbol;Acc:HGNC:5362]
ID4	inhibitor of DNA binding 4, HLH protein [Source:HGNC Symbol;Acc:HGNC:5363]
RBL1	RB transcriptional corepressor like 1 [Source:HGNC Symbol;Acc:HGNC:9893]
E2F4	E2F transcription factor 4 [Source:HGNC Symbol;Acc:HGNC:3118]
E2F5	E2F transcription factor 5 [Source:HGNC Symbol;Acc:HGNC:3119]
TFDP1	transcription factor Dp-1 [Source:HGNC Symbol;Acc:HGNC:11749]
CREBBP	CREB binding protein [Source:HGNC Symbol;Acc:HGNC:2348]
EP300	E1A binding protein p300 [Source:HGNC Symbol;Acc:HGNC:3373]
SP1	Sp1 transcription factor [Source:HGNC Symbol;Acc:HGNC:11205]
TGIF1	TGFB induced factor homeobox 1 [Source:HGNC Symbol;Acc:HGNC:11776]
TGIF2	TGFB induced factor homeobox 2 [Source:HGNC Symbol;Acc:HGNC:15764]
CDKN2B	cyclin dependent kinase inhibitor 2B [Source:HGNC Symbol;Acc:HGNC:1788]
PITX2	paired like homeodomain 2 [Source:HGNC Symbol;Acc:HGNC:9005]
RBX1	ring-box 1 [Source:HGNC Symbol;Acc:HGNC:9928]
CUL1	cullin 1 [Source:HGNC Symbol;Acc:HGNC:2551]
SKP1	S-phase kinase-associated protein 1 [Source:HGNC Symbol;Acc:HGNC:10899]
IFNG	interferon, gamma [Source:HGNC Symbol;Acc:HGNC:5438]
TNF	tumor necrosis factor [Source:HGNC Symbol;Acc:HGNC:11892]
ROCK1	Rho associated coiled-coil containing protein kinase 1 [Source:HGNC Symbol;Acc:HGNC:10251]
MINOS1	mitochondrial inner membrane organizing system 1 [Source:HGNC Symbol;Acc:HGNC:32068]
STAT3	signal transducer and activator of transcription 3 [Source:HGNC Symbol;Acc:HGNC:11364]
IFNGR1	interferon gamma receptor 1 [Source:HGNC Symbol;Acc:HGNC:5439]
IFNGR2	interferon gamma receptor 2 (interferon gamma transducer 1) [Source:HGNC Symbol;Acc:HGNC:5440]
MKNK1	MAP kinase interacting serine/threonine kinase 1 [Source:HGNC Symbol;Acc:HGNC:7110]
MKNK2	MAP kinase interacting serine/threonine kinase 2 [Source:HGNC Symbol;Acc:HGNC:7111]
HIF1A	hypoxia inducible factor 1 alpha subunit [Source:HGNC Symbol;Acc:HGNC:4910]
VHL	von Hippel-Lindau tumor suppressor [Source:HGNC Symbol;Acc:HGNC:12687]
CUL2	cullin 2 [Source:HGNC Symbol;Acc:HGNC:2552]
EGLN1	egl-9 family hypoxia inducible factor 1 [Source:HGNC Symbol;Acc:HGNC:1232]
EGLN3	egl-9 family hypoxia inducible factor 3 [Source:HGNC Symbol;Acc:HGNC:14661]
EGLN2	egl-9 family hypoxia inducible factor 2 [Source:HGNC Symbol;Acc:HGNC:14660]
ARNT	aryl hydrocarbon receptor nuclear translocator [Source:HGNC Symbol;Acc:HGNC:700]
CYBB	cytochrome b-245 beta chain [Source:HGNC Symbol;Acc:HGNC:2578]
CAMK2A	calcium/calmodulin dependent protein kinase II alpha [Source:HGNC Symbol;Acc:HGNC:1460]
CAMK2D	calcium/calmodulin dependent protein kinase II delta [Source:HGNC Symbol;Acc:HGNC:1462]
CAMK2B	calcium/calmodulin dependent protein kinase II beta [Source:HGNC Symbol;Acc:HGNC:1461]
CAMK2G	calcium/calmodulin dependent protein kinase II gamma [Source:HGNC Symbol;Acc:HGNC:1463]
TIMP1	TIMP metallopeptidase inhibitor 1 [Source:HGNC Symbol;Acc:HGNC:11820]
LTBR	lymphotoxin beta receptor [Source:HGNC Symbol;Acc:HGNC:6718]
TF	transferrin [Source:HGNC Symbol;Acc:HGNC:11740]
TFRC	transferrin receptor [Source:HGNC Symbol;Acc:HGNC:11763]
SERPINE1	serpin family E member 1 [Source:HGNC Symbol;Acc:HGNC:8583]
EDN1	endothelin 1 [Source:HGNC Symbol;Acc:HGNC:3176]
NOS2	nitric oxide synthase 2 [Source:HGNC Symbol;Acc:HGNC:7873]
HMOX1	heme oxygenase 1 [Source:HGNC Symbol;Acc:HGNC:5013]
NPPA	natriuretic peptide A [Source:HGNC Symbol;Acc:HGNC:7939]
SLC2A1	solute carrier family 2 member 1 [Source:HGNC Symbol;Acc:HGNC:11005]
PDK1	pyruvate dehydrogenase kinase 1 [Source:HGNC Symbol;Acc:HGNC:8809]
HK3	hexokinase 3 [Source:HGNC Symbol;Acc:HGNC:4925]
HK1	hexokinase 1 [Source:HGNC Symbol;Acc:HGNC:4922]
HK2	hexokinase 2 [Source:HGNC Symbol;Acc:HGNC:4923]
HKDC1	hexokinase domain containing 1 [Source:HGNC Symbol;Acc:HGNC:23302]
PFKM	phosphofructokinase, muscle [Source:HGNC Symbol;Acc:HGNC:8877]
PFKP	phosphofructokinase, platelet [Source:HGNC Symbol;Acc:HGNC:8878]
PFKL	phosphofructokinase, liver type [Source:HGNC Symbol;Acc:HGNC:8876]
GAPDH	glyceraldehyde-3-phosphate dehydrogenase [Source:HGNC Symbol;Acc:HGNC:4141]
ALDOC	aldolase, fructose-bisphosphate C [Source:HGNC Symbol;Acc:HGNC:418]
ALDOA	aldolase, fructose-bisphosphate A [Source:HGNC Symbol;Acc:HGNC:414]
ALDOB	aldolase, fructose-bisphosphate B [Source:HGNC Symbol;Acc:HGNC:417]
ENO3	enolase 3 [Source:HGNC Symbol;Acc:HGNC:3354]
ENO2	enolase 2 [Source:HGNC Symbol;Acc:HGNC:3353]
ENO1	enolase 1 [Source:HGNC Symbol;Acc:HGNC:3350]
ENO4	enolase family member 4 [Source:HGNC Symbol;Acc:HGNC:31670]
PGK2	phosphoglycerate kinase 2 [Source:HGNC Symbol;Acc:HGNC:8898]
PGK1	phosphoglycerate kinase 1 [Source:HGNC Symbol;Acc:HGNC:8896]
PFKFB3	6-phosphofructo-2-kinase/fructose-2,6-biphosphatase 3 [Source:HGNC Symbol;Acc:HGNC:8874]
LDHAL6A	lactate dehydrogenase A like 6A [Source:HGNC Symbol;Acc:HGNC:28335]
LDHAL6B	lactate dehydrogenase A like 6B [Source:HGNC Symbol;Acc:HGNC:21481]
LDHA	lactate dehydrogenase A [Source:HGNC Symbol;Acc:HGNC:6535]
LDHB	lactate dehydrogenase B [Source:HGNC Symbol;Acc:HGNC:6541]
LDHC	lactate dehydrogenase C [Source:HGNC Symbol;Acc:HGNC:6544]
PDHA2	pyruvate dehydrogenase (lipoamide) alpha 2 [Source:HGNC Symbol;Acc:HGNC:8807]
PDHA1	pyruvate dehydrogenase (lipoamide) alpha 1 [Source:HGNC Symbol;Acc:HGNC:8806]
PDHB	pyruvate dehydrogenase (lipoamide) beta [Source:HGNC Symbol;Acc:HGNC:8808]
TCEB2	transcription elongation factor B subunit 2 [Source:HGNC Symbol;Acc:HGNC:11619]
TCEB3	transcription elongation factor B subunit 3 [Source:HGNC Symbol;Acc:HGNC:11620]
MAP3K7	mitogen-activated protein kinase kinase kinase 7 [Source:HGNC Symbol;Acc:HGNC:6859]
CAB39	calcium binding protein 39 [Source:HGNC Symbol;Acc:HGNC:20292]
CAB39L	calcium binding protein 39 like [Source:HGNC Symbol;Acc:HGNC:20290]
STRADA	STE20-related kinase adaptor alpha [Source:HGNC Symbol;Acc:HGNC:30172]
STRADB	STE20-related kinase adaptor beta [Source:HGNC Symbol;Acc:HGNC:13205]
LEP	leptin [Source:HGNC Symbol;Acc:HGNC:6553]
LEPR	leptin receptor [Source:HGNC Symbol;Acc:HGNC:6554]
CAMKK2	calcium/calmodulin dependent protein kinase kinase 2 [Source:HGNC Symbol;Acc:HGNC:1470]
ADRA1A	adrenoceptor alpha 1A [Source:HGNC Symbol;Acc:HGNC:277]
ADIPOQ	adiponectin, C1Q and collagen domain containing [Source:HGNC Symbol;Acc:HGNC:13633]
ADIPOR1	adiponectin receptor 1 [Source:HGNC Symbol;Acc:HGNC:24040]
ADIPOR2	adiponectin receptor 2 [Source:HGNC Symbol;Acc:HGNC:24041]
PRKAB1	protein kinase AMP-activated non-catalytic subunit beta 1 [Source:HGNC Symbol;Acc:HGNC:9378]
PRKAB2	protein kinase AMP-activated non-catalytic subunit beta 2 [Source:HGNC Symbol;Acc:HGNC:9379]
PRKAG1	protein kinase AMP-activated non-catalytic subunit gamma 1 [Source:HGNC Symbol;Acc:HGNC:9385]
PRKAG3	protein kinase AMP-activated non-catalytic subunit gamma 3 [Source:HGNC Symbol;Acc:HGNC:9387]
PRKAG2	protein kinase AMP-activated non-catalytic subunit gamma 2 [Source:HGNC Symbol;Acc:HGNC:9386]
PFKFB1	6-phosphofructo-2-kinase/fructose-2,6-biphosphatase 1 [Source:HGNC Symbol;Acc:HGNC:8872]
PFKFB2	6-phosphofructo-2-kinase/fructose-2,6-biphosphatase 2 [Source:HGNC Symbol;Acc:HGNC:8873]
PFKFB4	6-phosphofructo-2-kinase/fructose-2,6-biphosphatase 4 [Source:HGNC Symbol;Acc:HGNC:8875]
FBP1	fructose-bisphosphatase 1 [Source:HGNC Symbol;Acc:HGNC:3606]
FBP2	fructose-bisphosphatase 2 [Source:HGNC Symbol;Acc:HGNC:3607]
HNF4A	hepatocyte nuclear factor 4 alpha [Source:HGNC Symbol;Acc:HGNC:5024]
PPARGC1A	PPARG coactivator 1 alpha [Source:HGNC Symbol;Acc:HGNC:9237]
ELAVL1	ELAV like RNA binding protein 1 [Source:HGNC Symbol;Acc:HGNC:3312]
CCNA2	cyclin A2 [Source:HGNC Symbol;Acc:HGNC:1578]
CCNA1	cyclin A1 [Source:HGNC Symbol;Acc:HGNC:1577]
EEF2K	eukaryotic elongation factor 2 kinase [Source:HGNC Symbol;Acc:HGNC:24615]
EEF2	eukaryotic translation elongation factor 2 [Source:HGNC Symbol;Acc:HGNC:3214]
FOXO1	forkhead box O1 [Source:HGNC Symbol;Acc:HGNC:3819]
SIRT1	sirtuin 1 [Source:HGNC Symbol;Acc:HGNC:14929]
SLC2A4	solute carrier family 2 member 4 [Source:HGNC Symbol;Acc:HGNC:11009]
LIPE	lipase E, hormone sensitive type [Source:HGNC Symbol;Acc:HGNC:6621]
HMGCR	3-hydroxy-3-methylglutaryl-CoA reductase [Source:HGNC Symbol;Acc:HGNC:5006]
SREBF1	sterol regulatory element binding transcription factor 1 [Source:HGNC Symbol;Acc:HGNC:11289]
FASN	fatty acid synthase [Source:HGNC Symbol;Acc:HGNC:3594]
ACACA	acetyl-CoA carboxylase alpha [Source:HGNC Symbol;Acc:HGNC:84]
SCD	stearoyl-CoA desaturase [Source:HGNC Symbol;Acc:HGNC:10571]
SCD5	stearoyl-CoA desaturase 5 [Source:HGNC Symbol;Acc:HGNC:21088]
ACACB	acetyl-CoA carboxylase beta [Source:HGNC Symbol;Acc:HGNC:85]
MLYCD	malonyl-CoA decarboxylase [Source:HGNC Symbol;Acc:HGNC:7150]
CPT1A	carnitine palmitoyltransferase 1A [Source:HGNC Symbol;Acc:HGNC:2328]
CPT1B	carnitine palmitoyltransferase 1B [Source:HGNC Symbol;Acc:HGNC:2329]
CPT1C	carnitine palmitoyltransferase 1C [Source:HGNC Symbol;Acc:HGNC:18540]
TBC1D1	TBC1 domain family member 1 [Source:HGNC Symbol;Acc:HGNC:11578]
RAB2A	RAB2A, member RAS oncogene family [Source:HGNC Symbol;Acc:HGNC:9763]
RAB8A	RAB8A, member RAS oncogene family [Source:HGNC Symbol;Acc:HGNC:7007]
RAB10	RAB10, member RAS oncogene family [Source:HGNC Symbol;Acc:HGNC:9759]
RAB11B	RAB11B, member RAS oncogene family [Source:HGNC Symbol;Acc:HGNC:9761]
RAB14	RAB14, member RAS oncogene family [Source:HGNC Symbol;Acc:HGNC:16524]
CFTR	cystic fibrosis transmembrane conductance regulator [Source:HGNC Symbol;Acc:HGNC:1884]
CD36	CD36 molecule [Source:HGNC Symbol;Acc:HGNC:1663]
IRS2	insulin receptor substrate 2 [Source:HGNC Symbol;Acc:HGNC:6126]
IRS4	insulin receptor substrate 4 [Source:HGNC Symbol;Acc:HGNC:6128]
AKT1S1	AKT1 substrate 1 [Source:HGNC Symbol;Acc:HGNC:28426]
PPARG	peroxisome proliferator activated receptor gamma [Source:HGNC Symbol;Acc:HGNC:9236]
ULK1	unc-51 like autophagy activating kinase 1 [Source:HGNC Symbol;Acc:HGNC:12558]
CACNA1A	calcium voltage-gated channel subunit alpha1 A [Source:HGNC Symbol;Acc:HGNC:1388]
CACNA1B	calcium voltage-gated channel subunit alpha1 B [Source:HGNC Symbol;Acc:HGNC:1389]
CACNA1C	calcium voltage-gated channel subunit alpha1 C [Source:HGNC Symbol;Acc:HGNC:1390]
CACNA1D	calcium voltage-gated channel subunit alpha1 D [Source:HGNC Symbol;Acc:HGNC:1391]
CACNA1E	calcium voltage-gated channel subunit alpha1 E [Source:HGNC Symbol;Acc:HGNC:1392]
CACNA1F	calcium voltage-gated channel subunit alpha1 F [Source:HGNC Symbol;Acc:HGNC:1393]
CACNA1G	calcium voltage-gated channel subunit alpha1 G [Source:HGNC Symbol;Acc:HGNC:1394]
CACNA1H	calcium voltage-gated channel subunit alpha1 H [Source:HGNC Symbol;Acc:HGNC:1395]
CACNA1I	calcium voltage-gated channel subunit alpha1 I [Source:HGNC Symbol;Acc:HGNC:1396]
CACNA1S	calcium voltage-gated channel subunit alpha1 S [Source:HGNC Symbol;Acc:HGNC:1397]
CACNA2D1	calcium voltage-gated channel auxiliary subunit alpha2delta 1 [Source:HGNC Symbol;Acc:HGNC:1399]
CACNA2D2	calcium voltage-gated channel auxiliary subunit alpha2delta 2 [Source:HGNC Symbol;Acc:HGNC:1400]
CACNA2D3	calcium voltage-gated channel auxiliary subunit alpha2delta 3 [Source:HGNC Symbol;Acc:HGNC:15460]
CACNA2D4	calcium voltage-gated channel auxiliary subunit alpha2delta 4 [Source:HGNC Symbol;Acc:HGNC:20202]
CACNB1	calcium voltage-gated channel auxiliary subunit beta 1 [Source:HGNC Symbol;Acc:HGNC:1401]
CACNB2	calcium voltage-gated channel auxiliary subunit beta 2 [Source:HGNC Symbol;Acc:HGNC:1402]
CACNB3	calcium voltage-gated channel auxiliary subunit beta 3 [Source:HGNC Symbol;Acc:HGNC:1403]
CACNB4	calcium voltage-gated channel auxiliary subunit beta 4 [Source:HGNC Symbol;Acc:HGNC:1404]
CACNG1	calcium voltage-gated channel auxiliary subunit gamma 1 [Source:HGNC Symbol;Acc:HGNC:1405]
CACNG2	calcium voltage-gated channel auxiliary subunit gamma 2 [Source:HGNC Symbol;Acc:HGNC:1406]
CACNG3	calcium voltage-gated channel auxiliary subunit gamma 3 [Source:HGNC Symbol;Acc:HGNC:1407]
CACNG4	calcium voltage-gated channel auxiliary subunit gamma 4 [Source:HGNC Symbol;Acc:HGNC:1408]
CACNG5	calcium voltage-gated channel auxiliary subunit gamma 5 [Source:HGNC Symbol;Acc:HGNC:1409]
CACNG6	calcium voltage-gated channel auxiliary subunit gamma 6 [Source:HGNC Symbol;Acc:HGNC:13625]
CACNG7	calcium voltage-gated channel auxiliary subunit gamma 7 [Source:HGNC Symbol;Acc:HGNC:13626]
CACNG8	calcium voltage-gated channel auxiliary subunit gamma 8 [Source:HGNC Symbol;Acc:HGNC:13628]
GNA12	G protein subunit alpha 12 [Source:HGNC Symbol;Acc:HGNC:4380]
RAPGEF2	Rap guanine nucleotide exchange factor 2 [Source:HGNC Symbol;Acc:HGNC:16854]
ARAF	A-Raf proto-oncogene, serine/threonine kinase [Source:HGNC Symbol;Acc:HGNC:646]
BRAF	B-Raf proto-oncogene, serine/threonine kinase [Source:HGNC Symbol;Acc:HGNC:1097]
LAMTOR3	late endosomal/lysosomal adaptor, MAPK and MTOR activator 3 [Source:HGNC Symbol;Acc:HGNC:15606]
RPS6KA3	ribosomal protein S6 kinase A3 [Source:HGNC Symbol;Acc:HGNC:10432]
RPS6KA1	ribosomal protein S6 kinase A1 [Source:HGNC Symbol;Acc:HGNC:10430]
RPS6KA2	ribosomal protein S6 kinase A2 [Source:HGNC Symbol;Acc:HGNC:10431]
RPS6KA6	ribosomal protein S6 kinase A6 [Source:HGNC Symbol;Acc:HGNC:10435]
ELK4	ELK4, ETS transcription factor [Source:HGNC Symbol;Acc:HGNC:3326]
SRF	serum response factor [Source:HGNC Symbol;Acc:HGNC:11291]
FOS	Fos proto-oncogene, AP-1 transcription factor subunit [Source:HGNC Symbol;Acc:HGNC:3796]
MAPT	microtubule associated protein tau [Source:HGNC Symbol;Acc:HGNC:6893]
STMN1	stathmin 1 [Source:HGNC Symbol;Acc:HGNC:6510]
IL1A	interleukin 1 alpha [Source:HGNC Symbol;Acc:HGNC:5991]
IL1B	interleukin 1 beta [Source:HGNC Symbol;Acc:HGNC:5992]
TNFRSF1A	tumor necrosis factor receptor superfamily member 1A [Source:HGNC Symbol;Acc:HGNC:11916]
IL1R1	interleukin 1 receptor type 1 [Source:HGNC Symbol;Acc:HGNC:5993]
IL1RAP	interleukin 1 receptor accessory protein [Source:HGNC Symbol;Acc:HGNC:5995]
FAS	Fas cell surface death receptor [Source:HGNC Symbol;Acc:HGNC:11920]
CD14	CD14 molecule [Source:HGNC Symbol;Acc:HGNC:1628]
TRADD	TNFRSF1A associated via death domain [Source:HGNC Symbol;Acc:HGNC:12030]
CASP3	caspase 3 [Source:HGNC Symbol;Acc:HGNC:1504]
TRAF2	TNF receptor associated factor 2 [Source:HGNC Symbol;Acc:HGNC:12032]
DAXX	death-domain associated protein [Source:HGNC Symbol;Acc:HGNC:2681]
MYD88	myeloid differentiation primary response 88 [Source:HGNC Symbol;Acc:HGNC:7562]
IRAK1	interleukin 1 receptor associated kinase 1 [Source:HGNC Symbol;Acc:HGNC:6112]
IRAK4	interleukin 1 receptor associated kinase 4 [Source:HGNC Symbol;Acc:HGNC:17967]
TRAF6	TNF receptor associated factor 6 [Source:HGNC Symbol;Acc:HGNC:12036]
GADD45A	growth arrest and DNA damage inducible alpha [Source:HGNC Symbol;Acc:HGNC:4095]
GADD45B	growth arrest and DNA damage inducible beta [Source:HGNC Symbol;Acc:HGNC:4096]
GADD45G	growth arrest and DNA damage inducible gamma [Source:HGNC Symbol;Acc:HGNC:4097]
TAB1	TGF-beta activated kinase 1/MAP3K7 binding protein 1 [Source:HGNC Symbol;Acc:HGNC:18157]
TAB2	TGF-beta activated kinase 1/MAP3K7 binding protein 2 [Source:HGNC Symbol;Acc:HGNC:17075]
ECSIT	ECSIT signalling integrator [Source:HGNC Symbol;Acc:HGNC:29548]
MAP4K3	mitogen-activated protein kinase kinase kinase kinase 3 [Source:HGNC Symbol;Acc:HGNC:6865]
MAP4K4	mitogen-activated protein kinase kinase kinase kinase 4 [Source:HGNC Symbol;Acc:HGNC:6866]
MAP4K1	mitogen-activated protein kinase kinase kinase kinase 1 [Source:HGNC Symbol;Acc:HGNC:6863]
STK3	serine/threonine kinase 3 [Source:HGNC Symbol;Acc:HGNC:11406]
MAP4K2	mitogen-activated protein kinase kinase kinase kinase 2 [Source:HGNC Symbol;Acc:HGNC:6864]
MAP3K8	mitogen-activated protein kinase kinase kinase 8 [Source:HGNC Symbol;Acc:HGNC:6860]
MAP3K1	mitogen-activated protein kinase kinase kinase 1 [Source:HGNC Symbol;Acc:HGNC:6848]
MAP3K11	mitogen-activated protein kinase kinase kinase 11 [Source:HGNC Symbol;Acc:HGNC:6850]
MAP3K2	mitogen-activated protein kinase kinase kinase 2 [Source:HGNC Symbol;Acc:HGNC:6854]
MAP3K3	mitogen-activated protein kinase kinase kinase 3 [Source:HGNC Symbol;Acc:HGNC:6855]
MAP3K13	mitogen-activated protein kinase kinase kinase 13 [Source:HGNC Symbol;Acc:HGNC:6852]
MAP3K12	mitogen-activated protein kinase kinase kinase 12 [Source:HGNC Symbol;Acc:HGNC:6851]
MAP3K6	mitogen-activated protein kinase kinase kinase 6 [Source:HGNC Symbol;Acc:HGNC:6858]
MAP3K5	mitogen-activated protein kinase kinase kinase 5 [Source:HGNC Symbol;Acc:HGNC:6857]
MAP3K4	mitogen-activated protein kinase kinase kinase 4 [Source:HGNC Symbol;Acc:HGNC:6856]
TAOK2	TAO kinase 2 [Source:HGNC Symbol;Acc:HGNC:16835]
TAOK3	TAO kinase 3 [Source:HGNC Symbol;Acc:HGNC:18133]
TAOK1	TAO kinase 1 [Source:HGNC Symbol;Acc:HGNC:29259]
MAP2K4	mitogen-activated protein kinase kinase 4 [Source:HGNC Symbol;Acc:HGNC:6844]
MAP2K7	mitogen-activated protein kinase kinase 7 [Source:HGNC Symbol;Acc:HGNC:6847]
MAP2K3	mitogen-activated protein kinase kinase 3 [Source:HGNC Symbol;Acc:HGNC:6843]
MAP2K6	mitogen-activated protein kinase kinase 6 [Source:HGNC Symbol;Acc:HGNC:6846]
MAPK8IP1	mitogen-activated protein kinase 8 interacting protein 1 [Source:HGNC Symbol;Acc:HGNC:6882]
MAPK8IP2	mitogen-activated protein kinase 8 interacting protein 2 [Source:HGNC Symbol;Acc:HGNC:6883]
MAPK8IP3	mitogen-activated protein kinase 8 interacting protein 3 [Source:HGNC Symbol;Acc:HGNC:6884]
FLNA	filamin A [Source:HGNC Symbol;Acc:HGNC:3754]
FLNC	filamin C [Source:HGNC Symbol;Acc:HGNC:3756]
FLNB	filamin B [Source:HGNC Symbol;Acc:HGNC:3755]
CRK	v-crk avian sarcoma virus CT10 oncogene homolog [Source:HGNC Symbol;Acc:HGNC:2362]
CRKL	v-crk avian sarcoma virus CT10 oncogene homolog-like [Source:HGNC Symbol;Acc:HGNC:2363]
ARRB1	arrestin beta 1 [Source:HGNC Symbol;Acc:HGNC:711]
ARRB2	arrestin beta 2 [Source:HGNC Symbol;Acc:HGNC:712]
MAPKAPK5	mitogen-activated protein kinase-activated protein kinase 5 [Source:HGNC Symbol;Acc:HGNC:6889]
RPS6KA5	ribosomal protein S6 kinase A5 [Source:HGNC Symbol;Acc:HGNC:10434]
RPS6KA4	ribosomal protein S6 kinase A4 [Source:HGNC Symbol;Acc:HGNC:10433]
CDC25B	cell division cycle 25B [Source:HGNC Symbol;Acc:HGNC:1726]
NFATC1	nuclear factor of activated T-cells 1 [Source:HGNC Symbol;Acc:HGNC:7775]
NFATC3	nuclear factor of activated T-cells 3 [Source:HGNC Symbol;Acc:HGNC:7777]
JUN	Jun proto-oncogene, AP-1 transcription factor subunit [Source:HGNC Symbol;Acc:HGNC:6204]
JUND	JunD proto-oncogene, AP-1 transcription factor subunit [Source:HGNC Symbol;Acc:HGNC:6206]
DDIT3	DNA damage inducible transcript 3 [Source:HGNC Symbol;Acc:HGNC:2726]
MAX	MYC associated factor X [Source:HGNC Symbol;Acc:HGNC:6913]
MEF2C	myocyte enhancer factor 2C [Source:HGNC Symbol;Acc:HGNC:6996]
PPM1A	protein phosphatase, Mg2+/Mn2+ dependent 1A [Source:HGNC Symbol;Acc:HGNC:9275]
PTPRR	protein tyrosine phosphatase, receptor type R [Source:HGNC Symbol;Acc:HGNC:9680]
PTPN5	protein tyrosine phosphatase, non-receptor type 5 [Source:HGNC Symbol;Acc:HGNC:9657]
PTPN7	protein tyrosine phosphatase, non-receptor type 7 [Source:HGNC Symbol;Acc:HGNC:9659]
DUSP1	dual specificity phosphatase 1 [Source:HGNC Symbol;Acc:HGNC:3064]
DUSP4	dual specificity phosphatase 4 [Source:HGNC Symbol;Acc:HGNC:3070]
DUSP2	dual specificity phosphatase 2 [Source:HGNC Symbol;Acc:HGNC:3068]
DUSP7	dual specificity phosphatase 7 [Source:HGNC Symbol;Acc:HGNC:3073]
DUSP8	dual specificity phosphatase 8 [Source:HGNC Symbol;Acc:HGNC:3074]
DUSP5	dual specificity phosphatase 5 [Source:HGNC Symbol;Acc:HGNC:3071]
DUSP16	dual specificity phosphatase 16 [Source:HGNC Symbol;Acc:HGNC:17909]
DUSP6	dual specificity phosphatase 6 [Source:HGNC Symbol;Acc:HGNC:3072]
DUSP9	dual specificity phosphatase 9 [Source:HGNC Symbol;Acc:HGNC:3076]
DUSP10	dual specificity phosphatase 10 [Source:HGNC Symbol;Acc:HGNC:3065]
DUSP3	dual specificity phosphatase 3 [Source:HGNC Symbol;Acc:HGNC:3069]
PPP5C	protein phosphatase 5 catalytic subunit [Source:HGNC Symbol;Acc:HGNC:9322]
PPM1B	protein phosphatase, Mg2+/Mn2+ dependent 1B [Source:HGNC Symbol;Acc:HGNC:9276]
HSPA8	heat shock protein family A (Hsp70) member 8 [Source:HGNC Symbol;Acc:HGNC:5241]
HSPA1A	heat shock protein family A (Hsp70) member 1A [Source:HGNC Symbol;Acc:HGNC:5232]
HSPA2	heat shock protein family A (Hsp70) member 2 [Source:HGNC Symbol;Acc:HGNC:5235]
HSPA1L	heat shock protein family A (Hsp70) member 1 like [Source:HGNC Symbol;Acc:HGNC:5234]
HSPA1B	heat shock protein family A (Hsp70) member 1B [Source:HGNC Symbol;Acc:HGNC:5233]
HSPA6	heat shock protein family A (Hsp70) member 6 [Source:HGNC Symbol;Acc:HGNC:5239]
MECOM	MDS1 and EVI1 complex locus [Source:HGNC Symbol;Acc:HGNC:3498]
MAP2K5	mitogen-activated protein kinase kinase 5 [Source:HGNC Symbol;Acc:HGNC:6845]
MAPK7	mitogen-activated protein kinase 7 [Source:HGNC Symbol;Acc:HGNC:6880]
MAP3K14	mitogen-activated protein kinase kinase kinase 14 [Source:HGNC Symbol;Acc:HGNC:6853]
NLK	nemo like kinase [Source:HGNC Symbol;Acc:HGNC:29858]
NFKB2	nuclear factor kappa B subunit 2 [Source:HGNC Symbol;Acc:HGNC:7795]
RELB	RELB proto-oncogene, NF-kB subunit [Source:HGNC Symbol;Acc:HGNC:9956]
DOCK4	dedicator of cytokinesis 4 [Source:HGNC Symbol;Acc:HGNC:19192]
F2RL3	F2R like thrombin/trypsin receptor 3 [Source:HGNC Symbol;Acc:HGNC:3540]
P2RY1	purinergic receptor P2Y1 [Source:HGNC Symbol;Acc:HGNC:8539]
FPR1	formyl peptide receptor 1 [Source:HGNC Symbol;Acc:HGNC:3826]
ADORA2A	adenosine A2a receptor [Source:HGNC Symbol;Acc:HGNC:263]
ADORA2B	adenosine A2b receptor [Source:HGNC Symbol;Acc:HGNC:264]
GNAS	GNAS complex locus [Source:HGNC Symbol;Acc:HGNC:4392]
ADCY1	adenylate cyclase 1 (brain) [Source:HGNC Symbol;Acc:HGNC:232]
ADCY2	adenylate cyclase 2 (brain) [Source:HGNC Symbol;Acc:HGNC:233]
ADCY3	adenylate cyclase 3 [Source:HGNC Symbol;Acc:HGNC:234]
ADCY4	adenylate cyclase 4 [Source:HGNC Symbol;Acc:HGNC:235]
ADCY5	adenylate cyclase 5 [Source:HGNC Symbol;Acc:HGNC:236]
ADCY6	adenylate cyclase 6 [Source:HGNC Symbol;Acc:HGNC:237]
ADCY7	adenylate cyclase 7 [Source:HGNC Symbol;Acc:HGNC:238]
ADCY8	adenylate cyclase 8 (brain) [Source:HGNC Symbol;Acc:HGNC:239]
ADCY9	adenylate cyclase 9 [Source:HGNC Symbol;Acc:HGNC:240]
RAPGEF3	Rap guanine nucleotide exchange factor 3 [Source:HGNC Symbol;Acc:HGNC:16629]
RAPGEF4	Rap guanine nucleotide exchange factor 4 [Source:HGNC Symbol;Acc:HGNC:16626]
GNAQ	G protein subunit alpha q [Source:HGNC Symbol;Acc:HGNC:4390]
PLCB1	phospholipase C beta 1 [Source:HGNC Symbol;Acc:HGNC:15917]
PLCB2	phospholipase C beta 2 [Source:HGNC Symbol;Acc:HGNC:9055]
PLCB3	phospholipase C beta 3 [Source:HGNC Symbol;Acc:HGNC:9056]
PLCB4	phospholipase C beta 4 [Source:HGNC Symbol;Acc:HGNC:9059]
RAPGEF1	Rap guanine nucleotide exchange factor 1 [Source:HGNC Symbol;Acc:HGNC:4568]
BCAR1	BCAR1, Cas family scaffolding protein [Source:HGNC Symbol;Acc:HGNC:971]
CDH1	cadherin 1 [Source:HGNC Symbol;Acc:HGNC:1748]
CTNNB1	catenin beta 1 [Source:HGNC Symbol;Acc:HGNC:2514]
MAGI3	membrane associated guanylate kinase, WW and PDZ domain containing 3 [Source:HGNC Symbol;Acc:HGNC:29647]
RAPGEF6	Rap guanine nucleotide exchange factor 6 [Source:HGNC Symbol;Acc:HGNC:20655]
LCP2	lymphocyte cytosolic protein 2 [Source:HGNC Symbol;Acc:HGNC:6529]
SKAP1	src kinase associated phosphoprotein 1 [Source:HGNC Symbol;Acc:HGNC:15605]
PRKD1	protein kinase D1 [Source:HGNC Symbol;Acc:HGNC:9407]
PRKD3	protein kinase D3 [Source:HGNC Symbol;Acc:HGNC:9408]
PRKD2	protein kinase D2 [Source:HGNC Symbol;Acc:HGNC:17293]
DRD2	dopamine receptor D2 [Source:HGNC Symbol;Acc:HGNC:3023]
CNR1	cannabinoid receptor 1 (brain) [Source:HGNC Symbol;Acc:HGNC:2159]
GNAI1	G protein subunit alpha i1 [Source:HGNC Symbol;Acc:HGNC:4384]
GNAI3	G protein subunit alpha i3 [Source:HGNC Symbol;Acc:HGNC:4387]
GNAI2	G protein subunit alpha i2 [Source:HGNC Symbol;Acc:HGNC:4385]
GNAO1	G protein subunit alpha o1 [Source:HGNC Symbol;Acc:HGNC:4389]
RAP1GAP	RAP1 GTPase activating protein [Source:HGNC Symbol;Acc:HGNC:9858]
SIPA1L1	signal induced proliferation associated 1 like 1 [Source:HGNC Symbol;Acc:HGNC:20284]
SIPA1	signal-induced proliferation-associated 1 [Source:HGNC Symbol;Acc:HGNC:10885]
SIPA1L2	signal induced proliferation associated 1 like 2 [Source:HGNC Symbol;Acc:HGNC:23800]
SIPA1L3	signal induced proliferation associated 1 like 3 [Source:HGNC Symbol;Acc:HGNC:23801]
APBB1IP	amyloid beta precursor protein binding family B member 1 interacting protein [Source:HGNC Symbol;Acc:HGNC:17379]
TLN1	talin 1 [Source:HGNC Symbol;Acc:HGNC:11845]
TLN2	talin 2 [Source:HGNC Symbol;Acc:HGNC:15447]
PFN3	profilin 3 [Source:HGNC Symbol;Acc:HGNC:18627]
PFN1	profilin 1 [Source:HGNC Symbol;Acc:HGNC:8881]
PFN2	profilin 2 [Source:HGNC Symbol;Acc:HGNC:8882]
PFN4	profilin family member 4 [Source:HGNC Symbol;Acc:HGNC:31103]
VASP	vasodilator-stimulated phosphoprotein [Source:HGNC Symbol;Acc:HGNC:12652]
ENAH	enabled homolog (Drosophila) [Source:HGNC Symbol;Acc:HGNC:18271]
EVL	Enah/Vasp-like [Source:HGNC Symbol;Acc:HGNC:20234]
ACTG1	actin gamma 1 [Source:HGNC Symbol;Acc:HGNC:144]
ACTB	actin beta [Source:HGNC Symbol;Acc:HGNC:132]
ARAP3	ArfGAP with RhoGAP domain, ankyrin repeat and PH domain 3 [Source:HGNC Symbol;Acc:HGNC:24097]
FARP2	FERM, ARH/RhoGEF and pleckstrin domain protein 2 [Source:HGNC Symbol;Acc:HGNC:16460]
VAV3	vav guanine nucleotide exchange factor 3 [Source:HGNC Symbol;Acc:HGNC:12659]
VAV1	vav guanine nucleotide exchange factor 1 [Source:HGNC Symbol;Acc:HGNC:12657]
VAV2	vav guanine nucleotide exchange factor 2 [Source:HGNC Symbol;Acc:HGNC:12658]
PARD3	par-3 family cell polarity regulator [Source:HGNC Symbol;Acc:HGNC:16051]
PARD6A	par-6 family cell polarity regulator alpha [Source:HGNC Symbol;Acc:HGNC:15943]
PARD6G	par-6 family cell polarity regulator gamma [Source:HGNC Symbol;Acc:HGNC:16076]
PARD6B	par-6 family cell polarity regulator beta [Source:HGNC Symbol;Acc:HGNC:16245]
PRKCZ	protein kinase C zeta [Source:HGNC Symbol;Acc:HGNC:9412]
PRKCI	protein kinase C iota [Source:HGNC Symbol;Acc:HGNC:9404]
CTNND1	catenin delta 1 [Source:HGNC Symbol;Acc:HGNC:2515]
KRIT1	KRIT1, ankyrin repeat containing [Source:HGNC Symbol;Acc:HGNC:1573]
RGS14	regulator of G-protein signaling 14 [Source:HGNC Symbol;Acc:HGNC:9996]
ITGAL	integrin subunit alpha L [Source:HGNC Symbol;Acc:HGNC:6148]
ITGAM	integrin subunit alpha M [Source:HGNC Symbol;Acc:HGNC:6149]
ITGB2	integrin subunit beta 2 [Source:HGNC Symbol;Acc:HGNC:6155]
FYB	FYN binding protein [Source:HGNC Symbol;Acc:HGNC:4036]
PORCN	porcupine homolog (Drosophila) [Source:HGNC Symbol;Acc:HGNC:17652]
WNT1	Wnt family member 1 [Source:HGNC Symbol;Acc:HGNC:12774]
WNT2	Wnt family member 2 [Source:HGNC Symbol;Acc:HGNC:12780]
WNT2B	Wnt family member 2B [Source:HGNC Symbol;Acc:HGNC:12781]
WNT3	Wnt family member 3 [Source:HGNC Symbol;Acc:HGNC:12782]
WNT3A	Wnt family member 3A [Source:HGNC Symbol;Acc:HGNC:15983]
WNT4	Wnt family member 4 [Source:HGNC Symbol;Acc:HGNC:12783]
WNT5A	Wnt family member 5A [Source:HGNC Symbol;Acc:HGNC:12784]
WNT5B	Wnt family member 5B [Source:HGNC Symbol;Acc:HGNC:16265]
WNT6	Wnt family member 6 [Source:HGNC Symbol;Acc:HGNC:12785]
WNT7A	Wnt family member 7A [Source:HGNC Symbol;Acc:HGNC:12786]
WNT7B	Wnt family member 7B [Source:HGNC Symbol;Acc:HGNC:12787]
WNT8A	Wnt family member 8A [Source:HGNC Symbol;Acc:HGNC:12788]
WNT8B	Wnt family member 8B [Source:HGNC Symbol;Acc:HGNC:12789]
WNT9A	Wnt family member 9A [Source:HGNC Symbol;Acc:HGNC:12778]
WNT9B	Wnt family member 9B [Source:HGNC Symbol;Acc:HGNC:12779]
WNT10B	Wnt family member 10B [Source:HGNC Symbol;Acc:HGNC:12775]
WNT10A	Wnt family member 10A [Source:HGNC Symbol;Acc:HGNC:13829]
WNT11	Wnt family member 11 [Source:HGNC Symbol;Acc:HGNC:12776]
WNT16	Wnt family member 16 [Source:HGNC Symbol;Acc:HGNC:16267]
CER1	cerberus 1, DAN family BMP antagonist [Source:HGNC Symbol;Acc:HGNC:1862]
NOTUM	NOTUM, palmitoleoyl-protein carboxylesterase [Source:HGNC Symbol;Acc:HGNC:27106]
WIF1	WNT inhibitory factor 1 [Source:HGNC Symbol;Acc:HGNC:18081]
SERPINF1	serpin family F member 1 [Source:HGNC Symbol;Acc:HGNC:8824]
SOST	sclerostin [Source:HGNC Symbol;Acc:HGNC:13771]
DKK1	dickkopf WNT signaling pathway inhibitor 1 [Source:HGNC Symbol;Acc:HGNC:2891]
DKK2	dickkopf WNT signaling pathway inhibitor 2 [Source:HGNC Symbol;Acc:HGNC:2892]
DKK4	dickkopf WNT signaling pathway inhibitor 4 [Source:HGNC Symbol;Acc:HGNC:2894]
SFRP1	secreted frizzled related protein 1 [Source:HGNC Symbol;Acc:HGNC:10776]
SFRP2	secreted frizzled related protein 2 [Source:HGNC Symbol;Acc:HGNC:10777]
SFRP4	secreted frizzled related protein 4 [Source:HGNC Symbol;Acc:HGNC:10778]
SFRP5	secreted frizzled related protein 5 [Source:HGNC Symbol;Acc:HGNC:10779]
RSPO1	R-spondin 1 [Source:HGNC Symbol;Acc:HGNC:21679]
RSPO2	R-spondin 2 [Source:HGNC Symbol;Acc:HGNC:28583]
RSPO3	R-spondin 3 [Source:HGNC Symbol;Acc:HGNC:20866]
RSPO4	R-spondin 4 [Source:HGNC Symbol;Acc:HGNC:16175]
LGR4	leucine rich repeat containing G protein-coupled receptor 4 [Source:HGNC Symbol;Acc:HGNC:13299]
LGR5	leucine rich repeat containing G protein-coupled receptor 5 [Source:HGNC Symbol;Acc:HGNC:4504]
LGR6	leucine rich repeat containing G protein-coupled receptor 6 [Source:HGNC Symbol;Acc:HGNC:19719]
RNF43	ring finger protein 43 [Source:HGNC Symbol;Acc:HGNC:18505]
ZNRF3	zinc and ring finger 3 [Source:HGNC Symbol;Acc:HGNC:18126]
FZD1	frizzled class receptor 1 [Source:HGNC Symbol;Acc:HGNC:4038]
FZD7	frizzled class receptor 7 [Source:HGNC Symbol;Acc:HGNC:4045]
FZD2	frizzled class receptor 2 [Source:HGNC Symbol;Acc:HGNC:4040]
FZD3	frizzled class receptor 3 [Source:HGNC Symbol;Acc:HGNC:4041]
FZD4	frizzled class receptor 4 [Source:HGNC Symbol;Acc:HGNC:4042]
FZD5	frizzled class receptor 5 [Source:HGNC Symbol;Acc:HGNC:4043]
FZD8	frizzled class receptor 8 [Source:HGNC Symbol;Acc:HGNC:4046]
FZD6	frizzled class receptor 6 [Source:HGNC Symbol;Acc:HGNC:4044]
FZD10	frizzled class receptor 10 [Source:HGNC Symbol;Acc:HGNC:4039]
FZD9	frizzled class receptor 9 [Source:HGNC Symbol;Acc:HGNC:4047]
LRP5	LDL receptor related protein 5 [Source:HGNC Symbol;Acc:HGNC:6697]
LRP6	LDL receptor related protein 6 [Source:HGNC Symbol;Acc:HGNC:6698]
CSNK1E	casein kinase 1 epsilon [Source:HGNC Symbol;Acc:HGNC:2453]
DVL3	dishevelled segment polarity protein 3 [Source:HGNC Symbol;Acc:HGNC:3087]
DVL2	dishevelled segment polarity protein 2 [Source:HGNC Symbol;Acc:HGNC:3086]
DVL1	dishevelled segment polarity protein 1 [Source:HGNC Symbol;Acc:HGNC:3084]
FRAT1	frequently rearranged in advanced T-cell lymphomas 1 [Source:HGNC Symbol;Acc:HGNC:3944]
FRAT2	frequently rearranged in advanced T-cell lymphomas 2 [Source:HGNC Symbol;Acc:HGNC:16048]
CSNK2A1	casein kinase 2 alpha 1 [Source:HGNC Symbol;Acc:HGNC:2457]
CSNK2A2	casein kinase 2 alpha 2 [Source:HGNC Symbol;Acc:HGNC:2459]
CSNK2A3	casein kinase 2 alpha 3 [Source:HGNC Symbol;Acc:HGNC:2458]
CSNK2B	casein kinase 2 beta [Source:HGNC Symbol;Acc:HGNC:2460]
NKD1	naked cuticle homolog 1 [Source:HGNC Symbol;Acc:HGNC:17045]
NKD2	naked cuticle homolog 2 [Source:HGNC Symbol;Acc:HGNC:17046]
CXXC4	CXXC finger protein 4 [Source:HGNC Symbol;Acc:HGNC:24593]
SENP2	SUMO1/sentrin/SMT3 specific peptidase 2 [Source:HGNC Symbol;Acc:HGNC:23116]
AXIN1	axin 1 [Source:HGNC Symbol;Acc:HGNC:903]
AXIN2	axin 2 [Source:HGNC Symbol;Acc:HGNC:904]
APC	adenomatous polyposis coli [Source:HGNC Symbol;Acc:HGNC:583]
APC2	adenomatosis polyposis coli 2 [Source:HGNC Symbol;Acc:HGNC:24036]
CSNK1A1L	casein kinase 1 alpha 1 like [Source:HGNC Symbol;Acc:HGNC:20289]
CSNK1A1	casein kinase 1 alpha 1 [Source:HGNC Symbol;Acc:HGNC:2451]
TCF7	transcription factor 7 (T-cell specific, HMG-box) [Source:HGNC Symbol;Acc:HGNC:11639]
TCF7L1	transcription factor 7 like 1 [Source:HGNC Symbol;Acc:HGNC:11640]
TCF7L2	transcription factor 7 like 2 [Source:HGNC Symbol;Acc:HGNC:11641]
LEF1	lymphoid enhancer binding factor 1 [Source:HGNC Symbol;Acc:HGNC:6551]
CTNNBIP1	catenin beta interacting protein 1 [Source:HGNC Symbol;Acc:HGNC:16913]
CBY1	chibby family member 1, beta catenin antagonist [Source:HGNC Symbol;Acc:HGNC:1307]
CHD8	chromodomain helicase DNA binding protein 8 [Source:HGNC Symbol;Acc:HGNC:20153]
SOX17	SRY-box 17 [Source:HGNC Symbol;Acc:HGNC:18122]
CTBP1	C-terminal binding protein 1 [Source:HGNC Symbol;Acc:HGNC:2494]
CTBP2	C-terminal binding protein 2 [Source:HGNC Symbol;Acc:HGNC:2495]
TLE1	transducin like enhancer of split 1 [Source:HGNC Symbol;Acc:HGNC:11837]
TLE2	transducin like enhancer of split 2 [Source:HGNC Symbol;Acc:HGNC:11838]
TLE3	transducin like enhancer of split 3 [Source:HGNC Symbol;Acc:HGNC:11839]
TLE4	transducin like enhancer of split 4 [Source:HGNC Symbol;Acc:HGNC:11840]
TLE6	transducin like enhancer of split 6 [Source:HGNC Symbol;Acc:HGNC:30788]
CTNND2	catenin delta 2 [Source:HGNC Symbol;Acc:HGNC:2516]
RUVBL1	RuvB like AAA ATPase 1 [Source:HGNC Symbol;Acc:HGNC:10474]
FOSL1	FOS like 1, AP-1 transcription factor subunit [Source:HGNC Symbol;Acc:HGNC:13718]
WISP1	WNT1 inducible signaling pathway protein 1 [Source:HGNC Symbol;Acc:HGNC:12769]
PPARD	peroxisome proliferator activated receptor delta [Source:HGNC Symbol;Acc:HGNC:9235]
MMP7	matrix metallopeptidase 7 [Source:HGNC Symbol;Acc:HGNC:7174]
PSEN1	presenilin 1 [Source:HGNC Symbol;Acc:HGNC:9508]
SIAH1	siah E3 ubiquitin protein ligase 1 [Source:HGNC Symbol;Acc:HGNC:10857]
CACYBP	calcyclin binding protein [Source:HGNC Symbol;Acc:HGNC:30423]
TBL1X	transducin (beta)-like 1X-linked [Source:HGNC Symbol;Acc:HGNC:11585]
TBL1Y	transducin (beta)-like 1, Y-linked [Source:HGNC Symbol;Acc:HGNC:18502]
TBL1XR1	transducin (beta)-like 1 X-linked receptor 1 [Source:HGNC Symbol;Acc:HGNC:29529]
BTRC	beta-transducin repeat containing E3 ubiquitin protein ligase [Source:HGNC Symbol;Acc:HGNC:1144]
FBXW11	F-box and WD repeat domain containing 11 [Source:HGNC Symbol;Acc:HGNC:13607]
GPC4	glypican 4 [Source:HGNC Symbol;Acc:HGNC:4452]
ROR1	receptor tyrosine kinase-like orphan receptor 1 [Source:HGNC Symbol;Acc:HGNC:10256]
ROR2	receptor tyrosine kinase like orphan receptor 2 [Source:HGNC Symbol;Acc:HGNC:10257]
RYK	receptor-like tyrosine kinase [Source:HGNC Symbol;Acc:HGNC:10481]
VANGL2	VANGL planar cell polarity protein 2 [Source:HGNC Symbol;Acc:HGNC:15511]
VANGL1	VANGL planar cell polarity protein 1 [Source:HGNC Symbol;Acc:HGNC:15512]
PRICKLE1	prickle planar cell polarity protein 1 [Source:HGNC Symbol;Acc:HGNC:17019]
PRICKLE2	prickle planar cell polarity protein 2 [Source:HGNC Symbol;Acc:HGNC:20340]
PRICKLE4	prickle planar cell polarity protein 4 [Source:HGNC Symbol;Acc:HGNC:16805]
PRICKLE3	prickle planar cell polarity protein 3 [Source:HGNC Symbol;Acc:HGNC:6645]
INVS	inversin [Source:HGNC Symbol;Acc:HGNC:17870]
DAAM1	dishevelled associated activator of morphogenesis 1 [Source:HGNC Symbol;Acc:HGNC:18142]
DAAM2	dishevelled associated activator of morphogenesis 2 [Source:HGNC Symbol;Acc:HGNC:18143]
ROCK2	Rho associated coiled-coil containing protein kinase 2 [Source:HGNC Symbol;Acc:HGNC:10252]
NFATC4	nuclear factor of activated T-cells 4 [Source:HGNC Symbol;Acc:HGNC:7778]
DLL3	delta like canonical Notch ligand 3 [Source:HGNC Symbol;Acc:HGNC:2909]
DLL1	delta like canonical Notch ligand 1 [Source:HGNC Symbol;Acc:HGNC:2908]
DLL4	delta like canonical Notch ligand 4 [Source:HGNC Symbol;Acc:HGNC:2910]
JAG1	jagged 1 [Source:HGNC Symbol;Acc:HGNC:6188]
JAG2	jagged 2 [Source:HGNC Symbol;Acc:HGNC:6189]
MFNG	MFNG O-fucosylpeptide 3-beta-N-acetylglucosaminyltransferase [Source:HGNC Symbol;Acc:HGNC:7038]
LFNG	LFNG O-fucosylpeptide 3-beta-N-acetylglucosaminyltransferase [Source:HGNC Symbol;Acc:HGNC:6560]
RFNG	RFNG O-fucosylpeptide 3-beta-N-acetylglucosaminyltransferase [Source:HGNC Symbol;Acc:HGNC:9974]
NOTCH1	notch 1 [Source:HGNC Symbol;Acc:HGNC:7881]
NOTCH2	notch 2 [Source:HGNC Symbol;Acc:HGNC:7882]
NOTCH3	notch 3 [Source:HGNC Symbol;Acc:HGNC:7883]
NOTCH4	notch 4 [Source:HGNC Symbol;Acc:HGNC:7884]
RBPJL	recombination signal binding protein for immunoglobulin kappa J region like [Source:HGNC Symbol;Acc:HGNC:13761]
RBPJ	recombination signal binding protein for immunoglobulin kappa J region [Source:HGNC Symbol;Acc:HGNC:5724]
HES1	hes family bHLH transcription factor 1 [Source:HGNC Symbol;Acc:HGNC:5192]
HES5	hes family bHLH transcription factor 5 [Source:HGNC Symbol;Acc:HGNC:19764]
HEYL	hes related family bHLH transcription factor with YRPW motif-like [Source:HGNC Symbol;Acc:HGNC:4882]
HEY1	hes related family bHLH transcription factor with YRPW motif 1 [Source:HGNC Symbol;Acc:HGNC:4880]
HEY2	hes related family bHLH transcription factor with YRPW motif 2 [Source:HGNC Symbol;Acc:HGNC:4881]
PTCRA	pre T-cell antigen receptor alpha [Source:HGNC Symbol;Acc:HGNC:21290]
NUMB	NUMB, endocytic adaptor protein [Source:HGNC Symbol;Acc:HGNC:8060]
NUMBL	NUMB like, endocytic adaptor protein [Source:HGNC Symbol;Acc:HGNC:8061]
DTX2	deltex 2, E3 ubiquitin ligase [Source:HGNC Symbol;Acc:HGNC:15973]
DTX3L	deltex 3 like, E3 ubiquitin ligase [Source:HGNC Symbol;Acc:HGNC:30323]
DTX1	deltex 1 [Source:HGNC Symbol;Acc:HGNC:3060]
DTX3	deltex 3, E3 ubiquitin ligase [Source:HGNC Symbol;Acc:HGNC:24457]
DTX4	deltex 4, E3 ubiquitin ligase [Source:HGNC Symbol;Acc:HGNC:29151]
ADAM17	ADAM metallopeptidase domain 17 [Source:HGNC Symbol;Acc:HGNC:195]
PSEN2	presenilin 2 [Source:HGNC Symbol;Acc:HGNC:9509]
PSENEN	presenilin enhancer gamma-secretase subunit [Source:HGNC Symbol;Acc:HGNC:30100]
NCSTN	nicastrin [Source:HGNC Symbol;Acc:HGNC:17091]
APH1A	aph-1 homolog A, gamma-secretase subunit [Source:HGNC Symbol;Acc:HGNC:29509]
APH1B	aph-1 homolog B, gamma-secretase subunit [Source:HGNC Symbol;Acc:HGNC:24080]
MAML3	mastermind like transcriptional coactivator 3 [Source:HGNC Symbol;Acc:HGNC:16272]
MAML2	mastermind like transcriptional coactivator 2 [Source:HGNC Symbol;Acc:HGNC:16259]
MAML1	mastermind like transcriptional coactivator 1 [Source:HGNC Symbol;Acc:HGNC:13632]
KAT2B	lysine acetyltransferase 2B [Source:HGNC Symbol;Acc:HGNC:8638]
KAT2A	lysine acetyltransferase 2A [Source:HGNC Symbol;Acc:HGNC:4201]
SNW1	SNW domain containing 1 [Source:HGNC Symbol;Acc:HGNC:16696]
NCOR2	nuclear receptor corepressor 2 [Source:HGNC Symbol;Acc:HGNC:7673]
CIR1	corepressor interacting with RBPJ, 1 [Source:HGNC Symbol;Acc:HGNC:24217]
HDAC1	histone deacetylase 1 [Source:HGNC Symbol;Acc:HGNC:4852]
HDAC2	histone deacetylase 2 [Source:HGNC Symbol;Acc:HGNC:4853]
ATXN1L	ataxin 1 like [Source:HGNC Symbol;Acc:HGNC:33279]
ATXN1	ataxin 1 [Source:HGNC Symbol;Acc:HGNC:10548]
PTCH1	patched 1 [Source:HGNC Symbol;Acc:HGNC:9585]
PTCH2	patched 2 [Source:HGNC Symbol;Acc:HGNC:9586]
SMO	smoothened, frizzled class receptor [Source:HGNC Symbol;Acc:HGNC:11119]
GPR161	G protein-coupled receptor 161 [Source:HGNC Symbol;Acc:HGNC:23694]
CSNK1G2	casein kinase 1 gamma 2 [Source:HGNC Symbol;Acc:HGNC:2455]
CSNK1G3	casein kinase 1 gamma 3 [Source:HGNC Symbol;Acc:HGNC:2456]
CSNK1G1	casein kinase 1 gamma 1 [Source:HGNC Symbol;Acc:HGNC:2454]
CSNK1D	casein kinase 1 delta [Source:HGNC Symbol;Acc:HGNC:2452]
GLI1	GLI family zinc finger 1 [Source:HGNC Symbol;Acc:HGNC:4317]
GLI2	GLI family zinc finger 2 [Source:HGNC Symbol;Acc:HGNC:4318]
GLI3	GLI family zinc finger 3 [Source:HGNC Symbol;Acc:HGNC:4319]
SUFU	SUFU negative regulator of hedgehog signaling [Source:HGNC Symbol;Acc:HGNC:16466]
KIF7	kinesin family member 7 [Source:HGNC Symbol;Acc:HGNC:30497]
HHIP	hedgehog interacting protein [Source:HGNC Symbol;Acc:HGNC:14866]
HHAT	hedgehog acyltransferase [Source:HGNC Symbol;Acc:HGNC:18270]
HHATL	hedgehog acyltransferase-like [Source:HGNC Symbol;Acc:HGNC:13242]
SHH	sonic hedgehog [Source:HGNC Symbol;Acc:HGNC:10848]
IHH	indian hedgehog [Source:HGNC Symbol;Acc:HGNC:5956]
DHH	desert hedgehog [Source:HGNC Symbol;Acc:HGNC:2865]
DISP1	dispatched RND transporter family member 1 [Source:HGNC Symbol;Acc:HGNC:19711]
SCUBE2	signal peptide, CUB domain and EGF like domain containing 2 [Source:HGNC Symbol;Acc:HGNC:30425]
BOC	BOC cell adhesion associated, oncogene regulated [Source:HGNC Symbol;Acc:HGNC:17173]
CDON	cell adhesion associated, oncogene regulated [Source:HGNC Symbol;Acc:HGNC:17104]
GAS1	growth arrest specific 1 [Source:HGNC Symbol;Acc:HGNC:4165]
LRP2	LDL receptor related protein 2 [Source:HGNC Symbol;Acc:HGNC:6694]
MEGF8	multiple EGF like domains 8 [Source:HGNC Symbol;Acc:HGNC:3233]
MGRN1	mahogunin ring finger 1 [Source:HGNC Symbol;Acc:HGNC:20254]
GRK2	G protein-coupled receptor kinase 2 [Source:HGNC Symbol;Acc:HGNC:289]
GRK3	G protein-coupled receptor kinase 3 [Source:HGNC Symbol;Acc:HGNC:290]
EVC	EvC ciliary complex subunit 1 [Source:HGNC Symbol;Acc:HGNC:3497]
EVC2	EvC ciliary complex subunit 2 [Source:HGNC Symbol;Acc:HGNC:19747]
EFCAB7	EF-hand calcium binding domain 7 [Source:HGNC Symbol;Acc:HGNC:29379]
IQCE	IQ motif containing E [Source:HGNC Symbol;Acc:HGNC:29171]
KIF3A	kinesin family member 3A [Source:HGNC Symbol;Acc:HGNC:6319]
CUL3	cullin 3 [Source:HGNC Symbol;Acc:HGNC:2553]
SPOP	speckle type BTB/POZ protein [Source:HGNC Symbol;Acc:HGNC:11254]
SPOPL	speckle type BTB/POZ protein like [Source:HGNC Symbol;Acc:HGNC:27934]
C16orf52	chromosome 16 open reading frame 52 [Source:HGNC Symbol;Acc:HGNC:27087]
CRB2	crumbs 2, cell polarity complex component [Source:HGNC Symbol;Acc:HGNC:18688]
CRB1	crumbs 1, cell polarity complex component [Source:HGNC Symbol;Acc:HGNC:2343]
PATJ	PATJ, crumbs cell polarity complex component [Source:HGNC Symbol;Acc:HGNC:28881]
MPP5	membrane palmitoylated protein 5 [Source:HGNC Symbol;Acc:HGNC:18669]
AMOT	angiomotin [Source:HGNC Symbol;Acc:HGNC:17810]
YAP1	Yes associated protein 1 [Source:HGNC Symbol;Acc:HGNC:16262]
WWTR1	WW domain containing transcription regulator 1 [Source:HGNC Symbol;Acc:HGNC:24042]
LIMD1	LIM domains containing 1 [Source:HGNC Symbol;Acc:HGNC:6612]
AJUBA	ajuba LIM protein [Source:HGNC Symbol;Acc:HGNC:20250]
WTIP	Wilms tumor 1 interacting protein [Source:HGNC Symbol;Acc:HGNC:20964]
NF2	neurofibromin 2 (merlin) [Source:HGNC Symbol;Acc:HGNC:7773]
WWC1	WW and C2 domain containing 1 [Source:HGNC Symbol;Acc:HGNC:29435]
FRMD1	FERM domain containing 1 [Source:HGNC Symbol;Acc:HGNC:21240]
FRMD6	FERM domain containing 6 [Source:HGNC Symbol;Acc:HGNC:19839]
SAV1	salvador family WW domain containing protein 1 [Source:HGNC Symbol;Acc:HGNC:17795]
RASSF6	Ras association domain family member 6 [Source:HGNC Symbol;Acc:HGNC:20796]
LATS2	large tumor suppressor kinase 2 [Source:HGNC Symbol;Acc:HGNC:6515]
LATS1	large tumor suppressor kinase 1 [Source:HGNC Symbol;Acc:HGNC:6514]
MOB1A	MOB kinase activator 1A [Source:HGNC Symbol;Acc:HGNC:16015]
MOB1B	MOB kinase activator 1B [Source:HGNC Symbol;Acc:HGNC:29801]
PPP1CA	protein phosphatase 1 catalytic subunit alpha [Source:HGNC Symbol;Acc:HGNC:9281]
PPP1CB	protein phosphatase 1 catalytic subunit beta [Source:HGNC Symbol;Acc:HGNC:9282]
PPP1CC	protein phosphatase 1 catalytic subunit gamma [Source:HGNC Symbol;Acc:HGNC:9283]
TP53BP2	tumor protein p53 binding protein 2 [Source:HGNC Symbol;Acc:HGNC:12000]
LLGL2	LLGL2, scribble cell polarity complex component [Source:HGNC Symbol;Acc:HGNC:6629]
LLGL1	LLGL1, scribble cell polarity complex component [Source:HGNC Symbol;Acc:HGNC:6628]
SCRIB	scribbled planar cell polarity protein [Source:HGNC Symbol;Acc:HGNC:30377]
DLG1	discs large MAGUK scaffold protein 1 [Source:HGNC Symbol;Acc:HGNC:2900]
DLG2	discs large MAGUK scaffold protein 2 [Source:HGNC Symbol;Acc:HGNC:2901]
DLG3	discs large MAGUK scaffold protein 3 [Source:HGNC Symbol;Acc:HGNC:2902]
DLG4	discs large MAGUK scaffold protein 4 [Source:HGNC Symbol;Acc:HGNC:2903]
DLG5	discs large MAGUK scaffold protein 5 [Source:HGNC Symbol;Acc:HGNC:2904]
TP73	tumor protein p73 [Source:HGNC Symbol;Acc:HGNC:12003]
BBC3	BCL2 binding component 3 [Source:HGNC Symbol;Acc:HGNC:17868]
TEAD1	TEA domain transcription factor 1 [Source:HGNC Symbol;Acc:HGNC:11714]
TEAD4	TEA domain transcription factor 4 [Source:HGNC Symbol;Acc:HGNC:11717]
TEAD3	TEA domain transcription factor 3 [Source:HGNC Symbol;Acc:HGNC:11716]
TEAD2	TEA domain transcription factor 2 [Source:HGNC Symbol;Acc:HGNC:11715]
CTGF	connective tissue growth factor [Source:HGNC Symbol;Acc:HGNC:2500]
BIRC5	baculoviral IAP repeat containing 5 [Source:HGNC Symbol;Acc:HGNC:593]
AFP	alpha fetoprotein [Source:HGNC Symbol;Acc:HGNC:317]
SOX2	SRY-box 2 [Source:HGNC Symbol;Acc:HGNC:11195]
SNAI2	snail family transcriptional repressor 2 [Source:HGNC Symbol;Acc:HGNC:11094]
BIRC2	baculoviral IAP repeat containing 2 [Source:HGNC Symbol;Acc:HGNC:590]
BIRC3	baculoviral IAP repeat containing 3 [Source:HGNC Symbol;Acc:HGNC:591]
CTNNA3	catenin alpha 3 [Source:HGNC Symbol;Acc:HGNC:2511]
CTNNA1	catenin alpha 1 [Source:HGNC Symbol;Acc:HGNC:2509]
CTNNA2	catenin alpha 2 [Source:HGNC Symbol;Acc:HGNC:2510]
IL5	interleukin 5 [Source:HGNC Symbol;Acc:HGNC:6016]
IL9	interleukin 9 [Source:HGNC Symbol;Acc:HGNC:6029]
IL10	interleukin 10 [Source:HGNC Symbol;Acc:HGNC:5962]
IL11	interleukin 11 [Source:HGNC Symbol;Acc:HGNC:5966]
IL12A	interleukin 12A [Source:HGNC Symbol;Acc:HGNC:5969]
IL12B	interleukin 12B [Source:HGNC Symbol;Acc:HGNC:5970]
IL13	interleukin 13 [Source:HGNC Symbol;Acc:HGNC:5973]
IL15	interleukin 15 [Source:HGNC Symbol;Acc:HGNC:5977]
IL17D	interleukin 17D [Source:HGNC Symbol;Acc:HGNC:5984]
IL19	interleukin 19 [Source:HGNC Symbol;Acc:HGNC:5990]
IL20	interleukin 20 [Source:HGNC Symbol;Acc:HGNC:6002]
IL21	interleukin 21 [Source:HGNC Symbol;Acc:HGNC:6005]
IL22	interleukin 22 [Source:HGNC Symbol;Acc:HGNC:14900]
IL23A	interleukin 23 subunit alpha [Source:HGNC Symbol;Acc:HGNC:15488]
IL24	interleukin 24 [Source:HGNC Symbol;Acc:HGNC:11346]
IFNE	interferon, epsilon [Source:HGNC Symbol;Acc:HGNC:18163]
IFNK	interferon kappa [Source:HGNC Symbol;Acc:HGNC:21714]
IFNL1	interferon, lambda 1 [Source:HGNC Symbol;Acc:HGNC:18363]
IFNL2	interferon, lambda 2 [Source:HGNC Symbol;Acc:HGNC:18364]
IFNL3	interferon, lambda 3 [Source:HGNC Symbol;Acc:HGNC:18365]
IFNW1	interferon, omega 1 [Source:HGNC Symbol;Acc:HGNC:5448]
LIF	leukemia inhibitory factor [Source:HGNC Symbol;Acc:HGNC:6596]
TSLP	thymic stromal lymphopoietin [Source:HGNC Symbol;Acc:HGNC:30743]
CTF1	cardiotrophin 1 [Source:HGNC Symbol;Acc:HGNC:2499]
CSF2	colony stimulating factor 2 [Source:HGNC Symbol;Acc:HGNC:2434]
CNTF	ciliary neurotrophic factor [Source:HGNC Symbol;Acc:HGNC:2169]
THPO	thrombopoietin [Source:HGNC Symbol;Acc:HGNC:11795]
IL5RA	interleukin 5 receptor subunit alpha [Source:HGNC Symbol;Acc:HGNC:6017]
IL9R	interleukin 9 receptor [Source:HGNC Symbol;Acc:HGNC:6030]
IL10RA	interleukin 10 receptor subunit alpha [Source:HGNC Symbol;Acc:HGNC:5964]
IL10RB	interleukin 10 receptor subunit beta [Source:HGNC Symbol;Acc:HGNC:5965]
IL11RA	interleukin 11 receptor subunit alpha [Source:HGNC Symbol;Acc:HGNC:5967]
IL12RB1	interleukin 12 receptor subunit beta 1 [Source:HGNC Symbol;Acc:HGNC:5971]
IL12RB2	interleukin 12 receptor subunit beta 2 [Source:HGNC Symbol;Acc:HGNC:5972]
IL13RA1	interleukin 13 receptor subunit alpha 1 [Source:HGNC Symbol;Acc:HGNC:5974]
IL13RA2	interleukin 13 receptor subunit alpha 2 [Source:HGNC Symbol;Acc:HGNC:5975]
IL15RA	interleukin 15 receptor subunit alpha [Source:HGNC Symbol;Acc:HGNC:5978]
IL20RA	interleukin 20 receptor subunit alpha [Source:HGNC Symbol;Acc:HGNC:6003]
IL20RB	interleukin 20 receptor subunit beta [Source:HGNC Symbol;Acc:HGNC:6004]
IL21R	interleukin 21 receptor [Source:HGNC Symbol;Acc:HGNC:6006]
IL22RA1	interleukin 22 receptor subunit alpha 1 [Source:HGNC Symbol;Acc:HGNC:13700]
IL22RA2	interleukin 22 receptor subunit alpha 2 [Source:HGNC Symbol;Acc:HGNC:14901]
IL23R	interleukin 23 receptor [Source:HGNC Symbol;Acc:HGNC:19100]
IL27RA	interleukin 27 receptor subunit alpha [Source:HGNC Symbol;Acc:HGNC:17290]
IL6ST	interleukin 6 signal transducer [Source:HGNC Symbol;Acc:HGNC:6021]
IFNLR1	interferon lambda receptor 1 [Source:HGNC Symbol;Acc:HGNC:18584]
LIFR	leukemia inhibitory factor receptor alpha [Source:HGNC Symbol;Acc:HGNC:6597]
CRLF2	cytokine receptor-like factor 2 [Source:HGNC Symbol;Acc:HGNC:14281]
CNTFR	ciliary neurotrophic factor receptor [Source:HGNC Symbol;Acc:HGNC:2170]
CSF2RA	colony stimulating factor 2 receptor alpha subunit [Source:HGNC Symbol;Acc:HGNC:2435]
CSF2RB	colony stimulating factor 2 receptor beta common subunit [Source:HGNC Symbol;Acc:HGNC:2436]
MPL	MPL proto-oncogene, thrombopoietin receptor [Source:HGNC Symbol;Acc:HGNC:7217]
TYK2	tyrosine kinase 2 [Source:HGNC Symbol;Acc:HGNC:12440]
STAT1	signal transducer and activator of transcription 1 [Source:HGNC Symbol;Acc:HGNC:11362]
STAT2	signal transducer and activator of transcription 2 [Source:HGNC Symbol;Acc:HGNC:11363]
STAT4	signal transducer and activator of transcription 4 [Source:HGNC Symbol;Acc:HGNC:11365]
STAT5A	signal transducer and activator of transcription 5A [Source:HGNC Symbol;Acc:HGNC:11366]
STAT5B	signal transducer and activator of transcription 5B [Source:HGNC Symbol;Acc:HGNC:11367]
STAT6	signal transducer and activator of transcription 6 [Source:HGNC Symbol;Acc:HGNC:11368]
CISH	cytokine inducible SH2 containing protein [Source:HGNC Symbol;Acc:HGNC:1984]
SOCS1	suppressor of cytokine signaling 1 [Source:HGNC Symbol;Acc:HGNC:19383]
SOCS2	suppressor of cytokine signaling 2 [Source:HGNC Symbol;Acc:HGNC:19382]
SOCS3	suppressor of cytokine signaling 3 [Source:HGNC Symbol;Acc:HGNC:19391]
SOCS4	suppressor of cytokine signaling 4 [Source:HGNC Symbol;Acc:HGNC:19392]
SOCS5	suppressor of cytokine signaling 5 [Source:HGNC Symbol;Acc:HGNC:16852]
SOCS7	suppressor of cytokine signaling 7 [Source:HGNC Symbol;Acc:HGNC:29846]
SOCS6	suppressor of cytokine signaling 6 [Source:HGNC Symbol;Acc:HGNC:16833]
PIM1	Pim-1 proto-oncogene, serine/threonine kinase [Source:HGNC Symbol;Acc:HGNC:8986]
AOX1	aldehyde oxidase 1 [Source:HGNC Symbol;Acc:HGNC:553]
GFAP	glial fibrillary acidic protein [Source:HGNC Symbol;Acc:HGNC:4235]
STAM2	signal transducing adaptor molecule 2 [Source:HGNC Symbol;Acc:HGNC:11358]
STAM	signal transducing adaptor molecule [Source:HGNC Symbol;Acc:HGNC:11357]
PTPN2	protein tyrosine phosphatase, non-receptor type 2 [Source:HGNC Symbol;Acc:HGNC:9650]
PTPN6	protein tyrosine phosphatase, non-receptor type 6 [Source:HGNC Symbol;Acc:HGNC:9658]
IRF9	interferon regulatory factor 9 [Source:HGNC Symbol;Acc:HGNC:6131]
PIAS1	protein inhibitor of activated STAT 1 [Source:HGNC Symbol;Acc:HGNC:2752]
PIAS2	protein inhibitor of activated STAT 2 [Source:HGNC Symbol;Acc:HGNC:17311]
PIAS3	protein inhibitor of activated STAT 3 [Source:HGNC Symbol;Acc:HGNC:16861]
PIAS4	protein inhibitor of activated STAT 4 [Source:HGNC Symbol;Acc:HGNC:17002]
FHL1	four and a half LIM domains 1 [Source:HGNC Symbol;Acc:HGNC:3702]
ADCY10	adenylate cyclase 10 (soluble) [Source:HGNC Symbol;Acc:HGNC:21285]
APLN	apelin [Source:HGNC Symbol;Acc:HGNC:16665]
APELA	apelin receptor early endogenous ligand [Source:HGNC Symbol;Acc:HGNC:48925]
APLNR	apelin receptor [Source:HGNC Symbol;Acc:HGNC:339]
ITPR1	inositol 1,4,5-trisphosphate receptor type 1 [Source:HGNC Symbol;Acc:HGNC:6180]
ITPR2	inositol 1,4,5-trisphosphate receptor type 2 [Source:HGNC Symbol;Acc:HGNC:6181]
ITPR3	inositol 1,4,5-trisphosphate receptor type 3 [Source:HGNC Symbol;Acc:HGNC:6182]
RYR1	ryanodine receptor 1 [Source:HGNC Symbol;Acc:HGNC:10483]
RYR2	ryanodine receptor 2 [Source:HGNC Symbol;Acc:HGNC:10484]
RYR3	ryanodine receptor 3 [Source:HGNC Symbol;Acc:HGNC:10485]
NOS1	nitric oxide synthase 1 [Source:HGNC Symbol;Acc:HGNC:7872]
PRKCE	protein kinase C epsilon [Source:HGNC Symbol;Acc:HGNC:9401]
SLC9A1	solute carrier family 9 member A1 [Source:HGNC Symbol;Acc:HGNC:11071]
SLC8A1	solute carrier family 8 member A1 [Source:HGNC Symbol;Acc:HGNC:11068]
SLC8A2	solute carrier family 8 member A2 [Source:HGNC Symbol;Acc:HGNC:11069]
SLC8A3	solute carrier family 8 member A3 [Source:HGNC Symbol;Acc:HGNC:11070]
MYLK	myosin light chain kinase [Source:HGNC Symbol;Acc:HGNC:7590]
MYLK2	myosin light chain kinase 2 [Source:HGNC Symbol;Acc:HGNC:16243]
MYLK3	myosin light chain kinase 3 [Source:HGNC Symbol;Acc:HGNC:29826]
MYLK4	myosin light chain kinase family member 4 [Source:HGNC Symbol;Acc:HGNC:27972]
MYL2	myosin light chain 2 [Source:HGNC Symbol;Acc:HGNC:7583]
MYL3	myosin light chain 3 [Source:HGNC Symbol;Acc:HGNC:7584]
MYL4	myosin light chain 4 [Source:HGNC Symbol;Acc:HGNC:7585]
EGR1	early growth response 1 [Source:HGNC Symbol;Acc:HGNC:3238]
PDE3B	phosphodiesterase 3B [Source:HGNC Symbol;Acc:HGNC:8779]
PIK3C3	phosphatidylinositol 3-kinase catalytic subunit type 3 [Source:HGNC Symbol;Acc:HGNC:8974]
PIK3R4	phosphoinositide-3-kinase regulatory subunit 4 [Source:HGNC Symbol;Acc:HGNC:8982]
BECN1	beclin 1 [Source:HGNC Symbol;Acc:HGNC:1034]
BECN2	beclin 2 [Source:HGNC Symbol;Acc:HGNC:38606]
MAP1LC3C	microtubule associated protein 1 light chain 3 gamma [Source:HGNC Symbol;Acc:HGNC:13353]
MAP1LC3B	microtubule associated protein 1 light chain 3 beta [Source:HGNC Symbol;Acc:HGNC:13352]
MAP1LC3A	microtubule associated protein 1 light chain 3 alpha [Source:HGNC Symbol;Acc:HGNC:6838]
MAP1LC3B2	microtubule associated protein 1 light chain 3 beta 2 [Source:HGNC Symbol;Acc:HGNC:34390]
PLIN1	perilipin 1 [Source:HGNC Symbol;Acc:HGNC:9076]
UCP1	uncoupling protein 1 [Source:HGNC Symbol;Acc:HGNC:12517]
NRF1	nuclear respiratory factor 1 [Source:HGNC Symbol;Acc:HGNC:7996]
TFAM	transcription factor A, mitochondrial [Source:HGNC Symbol;Acc:HGNC:11741]
KLF2	Kruppel like factor 2 [Source:HGNC Symbol;Acc:HGNC:6347]
GNA13	G protein subunit alpha 13 [Source:HGNC Symbol;Acc:HGNC:4381]
CAMK4	calcium/calmodulin dependent protein kinase IV [Source:HGNC Symbol;Acc:HGNC:1464]
HDAC4	histone deacetylase 4 [Source:HGNC Symbol;Acc:HGNC:14063]
HDAC5	histone deacetylase 5 [Source:HGNC Symbol;Acc:HGNC:14068]
MEF2A	myocyte enhancer factor 2A [Source:HGNC Symbol;Acc:HGNC:6993]
BORCS8-MEF2B	BORCS8-MEF2B readthrough [Source:HGNC Symbol;Acc:HGNC:39979]
MEF2B	myocyte enhancer factor 2B [Source:HGNC Symbol;Acc:HGNC:6995]
MEF2D	myocyte enhancer factor 2D [Source:HGNC Symbol;Acc:HGNC:6997]
ACTA2	actin, alpha 2, smooth muscle, aorta [Source:HGNC Symbol;Acc:HGNC:130]
AGTR1	angiotensin II receptor type 1 [Source:HGNC Symbol;Acc:HGNC:336]
PLAT	plasminogen activator, tissue type [Source:HGNC Symbol;Acc:HGNC:9051]
LCK	LCK proto-oncogene, Src family tyrosine kinase [Source:HGNC Symbol;Acc:HGNC:6524]
PRKCQ	protein kinase C theta [Source:HGNC Symbol;Acc:HGNC:9410]
LYN	LYN proto-oncogene, Src family tyrosine kinase [Source:HGNC Symbol;Acc:HGNC:6735]
BLNK	B-cell linker [Source:HGNC Symbol;Acc:HGNC:14211]
BTK	Bruton tyrosine kinase [Source:HGNC Symbol;Acc:HGNC:1133]
CARD10	caspase recruitment domain family member 10 [Source:HGNC Symbol;Acc:HGNC:16422]
CARD11	caspase recruitment domain family member 11 [Source:HGNC Symbol;Acc:HGNC:16393]
CARD14	caspase recruitment domain family member 14 [Source:HGNC Symbol;Acc:HGNC:16446]
BCL10	B-cell CLL/lymphoma 10 [Source:HGNC Symbol;Acc:HGNC:989]
MALT1	MALT1 paracaspase [Source:HGNC Symbol;Acc:HGNC:6819]
RIPK1	receptor interacting serine/threonine kinase 1 [Source:HGNC Symbol;Acc:HGNC:10019]
TRAF5	TNF receptor associated factor 5 [Source:HGNC Symbol;Acc:HGNC:12035]
EDA	ectodysplasin A [Source:HGNC Symbol;Acc:HGNC:3157]
EDAR	ectodysplasin A receptor [Source:HGNC Symbol;Acc:HGNC:2895]
EDARADD	EDAR-associated death domain [Source:HGNC Symbol;Acc:HGNC:14341]
CYLD	CYLD lysine 63 deubiquitinase [Source:HGNC Symbol;Acc:HGNC:2584]
EDA2R	ectodysplasin A2 receptor [Source:HGNC Symbol;Acc:HGNC:17756]
DDX58	DEXD/H-box helicase 58 [Source:HGNC Symbol;Acc:HGNC:19102]
TRIM25	tripartite motif containing 25 [Source:HGNC Symbol;Acc:HGNC:12932]
LBP	lipopolysaccharide binding protein [Source:HGNC Symbol;Acc:HGNC:6517]
LY96	lymphocyte antigen 96 [Source:HGNC Symbol;Acc:HGNC:17156]
TIRAP	toll-interleukin 1 receptor (TIR) domain containing adaptor protein [Source:HGNC Symbol;Acc:HGNC:17192]
TICAM2	toll like receptor adaptor molecule 2 [Source:HGNC Symbol;Acc:HGNC:21354]
TICAM1	toll like receptor adaptor molecule 1 [Source:HGNC Symbol;Acc:HGNC:18348]
CD40LG	CD40 ligand [Source:HGNC Symbol;Acc:HGNC:11935]
CD40	CD40 molecule [Source:HGNC Symbol;Acc:HGNC:11919]
TRAF3	TNF receptor associated factor 3 [Source:HGNC Symbol;Acc:HGNC:12033]
TNFSF11	tumor necrosis factor superfamily member 11 [Source:HGNC Symbol;Acc:HGNC:11926]
TNFRSF11A	tumor necrosis factor receptor superfamily member 11a [Source:HGNC Symbol;Acc:HGNC:11908]
LTA	lymphotoxin alpha [Source:HGNC Symbol;Acc:HGNC:6709]
LTB	lymphotoxin beta [Source:HGNC Symbol;Acc:HGNC:6711]
TNFSF14	tumor necrosis factor superfamily member 14 [Source:HGNC Symbol;Acc:HGNC:11930]
TAB3	TGF-beta activated kinase 1/MAP3K7 binding protein 3 [Source:HGNC Symbol;Acc:HGNC:30681]
TNFSF13B	tumor necrosis factor superfamily member 13b [Source:HGNC Symbol;Acc:HGNC:11929]
TNFRSF13C	tumor necrosis factor receptor superfamily member 13C [Source:HGNC Symbol;Acc:HGNC:17755]
PARP1	poly(ADP-ribose) polymerase 1 [Source:HGNC Symbol;Acc:HGNC:270]
UBE2I	ubiquitin conjugating enzyme E2 I [Source:HGNC Symbol;Acc:HGNC:12485]
ATM	ATM serine/threonine kinase [Source:HGNC Symbol;Acc:HGNC:795]
PIDD1	p53-induced death domain protein 1 [Source:HGNC Symbol;Acc:HGNC:16491]
ERC1	ELKS/RAB6-interacting/CAST family member 1 [Source:HGNC Symbol;Acc:HGNC:17072]
NFKBIA	NFKB inhibitor alpha [Source:HGNC Symbol;Acc:HGNC:7797]
CFLAR	CASP8 and FADD like apoptosis regulator [Source:HGNC Symbol;Acc:HGNC:1876]
XIAP	X-linked inhibitor of apoptosis [Source:HGNC Symbol;Acc:HGNC:592]
TRAF1	TNF receptor associated factor 1 [Source:HGNC Symbol;Acc:HGNC:12031]
BCL2A1	BCL2 related protein A1 [Source:HGNC Symbol;Acc:HGNC:991]
CXCL8	C-X-C motif chemokine ligand 8 [Source:HGNC Symbol;Acc:HGNC:6025]
TNFAIP3	TNF alpha induced protein 3 [Source:HGNC Symbol;Acc:HGNC:11896]
CCL4	C-C motif chemokine ligand 4 [Source:HGNC Symbol;Acc:HGNC:10630]
CCL4L2	C-C motif chemokine ligand 4 like 2 [Source:HGNC Symbol;Acc:HGNC:24066]
CXCL1	C-X-C motif chemokine ligand 1 [Source:HGNC Symbol;Acc:HGNC:4602]
CXCL2	C-X-C motif chemokine ligand 2 [Source:HGNC Symbol;Acc:HGNC:4603]
CXCL3	C-X-C motif chemokine ligand 3 [Source:HGNC Symbol;Acc:HGNC:4604]
VCAM1	vascular cell adhesion molecule 1 [Source:HGNC Symbol;Acc:HGNC:12663]
PLAU	plasminogen activator, urokinase [Source:HGNC Symbol;Acc:HGNC:9052]
CCL13	C-C motif chemokine ligand 13 [Source:HGNC Symbol;Acc:HGNC:10611]
CCL19	C-C motif chemokine ligand 19 [Source:HGNC Symbol;Acc:HGNC:10617]
CCL21	C-C motif chemokine ligand 21 [Source:HGNC Symbol;Acc:HGNC:10620]
CXCL12	C-X-C motif chemokine ligand 12 [Source:HGNC Symbol;Acc:HGNC:10672]
ICAM1	intercellular adhesion molecule 1 [Source:HGNC Symbol;Acc:HGNC:5344]
BAG4	BCL2 associated athanogene 4 [Source:HGNC Symbol;Acc:HGNC:940]
ITCH	itchy E3 ubiquitin protein ligase [Source:HGNC Symbol;Acc:HGNC:13890]
CEBPB	CCAAT/enhancer binding protein beta [Source:HGNC Symbol;Acc:HGNC:1834]
RIPK3	receptor interacting serine/threonine kinase 3 [Source:HGNC Symbol;Acc:HGNC:10021]
MLKL	mixed lineage kinase domain-like [Source:HGNC Symbol;Acc:HGNC:26617]
PGAM5	PGAM family member 5, mitochondrial serine/threonine protein phosphatase [Source:HGNC Symbol;Acc:HGNC:28763]
DNM1L	dynamin 1-like [Source:HGNC Symbol;Acc:HGNC:2973]
FADD	Fas associated via death domain [Source:HGNC Symbol;Acc:HGNC:3573]
CASP8	caspase 8 [Source:HGNC Symbol;Acc:HGNC:1509]
CASP10	caspase 10 [Source:HGNC Symbol;Acc:HGNC:1500]
CASP7	caspase 7 [Source:HGNC Symbol;Acc:HGNC:1508]
CCL2	C-C motif chemokine ligand 2 [Source:HGNC Symbol;Acc:HGNC:10618]
CCL5	C-C motif chemokine ligand 5 [Source:HGNC Symbol;Acc:HGNC:10632]
CCL20	C-C motif chemokine ligand 20 [Source:HGNC Symbol;Acc:HGNC:10619]
CXCL5	C-X-C motif chemokine ligand 5 [Source:HGNC Symbol;Acc:HGNC:10642]
CXCL6	C-X-C motif chemokine ligand 6 [Source:HGNC Symbol;Acc:HGNC:10643]
CXCL10	C-X-C motif chemokine ligand 10 [Source:HGNC Symbol;Acc:HGNC:10637]
CX3CL1	C-X3-C motif chemokine ligand 1 [Source:HGNC Symbol;Acc:HGNC:10647]
IL18R1	interleukin 18 receptor 1 [Source:HGNC Symbol;Acc:HGNC:5988]
BCL3	B-cell CLL/lymphoma 3 [Source:HGNC Symbol;Acc:HGNC:998]
JUNB	JunB proto-oncogene, AP-1 transcription factor subunit [Source:HGNC Symbol;Acc:HGNC:6205]
MMP3	matrix metallopeptidase 3 [Source:HGNC Symbol;Acc:HGNC:7173]
MMP9	matrix metallopeptidase 9 [Source:HGNC Symbol;Acc:HGNC:7176]
MMP14	matrix metallopeptidase 14 [Source:HGNC Symbol;Acc:HGNC:7160]
NOD2	nucleotide binding oligomerization domain containing 2 [Source:HGNC Symbol;Acc:HGNC:5331]
SELE	selectin E [Source:HGNC Symbol;Acc:HGNC:10718]
TNFRSF1B	tumor necrosis factor receptor superfamily member 1B [Source:HGNC Symbol;Acc:HGNC:11917]
DAB2IP	DAB2 interacting protein [Source:HGNC Symbol;Acc:HGNC:17294]
IRF1	interferon regulatory factor 1 [Source:HGNC Symbol;Acc:HGNC:6116]
SKP2	S-phase kinase-associated protein 2, E3 ubiquitin protein ligase [Source:HGNC Symbol;Acc:HGNC:10901]
SETD7	SET domain containing lysine methyltransferase 7 [Source:HGNC Symbol;Acc:HGNC:30412]
USP7	ubiquitin specific peptidase 7 (herpes virus-associated) [Source:HGNC Symbol;Acc:HGNC:12630]
FOXO6	forkhead box O6 [Source:HGNC Symbol;Acc:HGNC:24814]
GRM1	glutamate metabotropic receptor 1 [Source:HGNC Symbol;Acc:HGNC:4593]
HOMER1	homer scaffolding protein 1 [Source:HGNC Symbol;Acc:HGNC:17512]
HOMER2	homer scaffolding protein 2 [Source:HGNC Symbol;Acc:HGNC:17513]
HOMER3	homer scaffolding protein 3 [Source:HGNC Symbol;Acc:HGNC:17514]
AGAP2	ArfGAP with GTPase domain, ankyrin repeat and PH domain 2 [Source:HGNC Symbol;Acc:HGNC:16921]
PRMT1	protein arginine methyltransferase 1 [Source:HGNC Symbol;Acc:HGNC:5187]
FOXG1	forkhead box G1 [Source:HGNC Symbol;Acc:HGNC:3811]
CCNB1	cyclin B1 [Source:HGNC Symbol;Acc:HGNC:1579]
CCNB2	cyclin B2 [Source:HGNC Symbol;Acc:HGNC:1580]
CCNB3	cyclin B3 [Source:HGNC Symbol;Acc:HGNC:18709]
CCNG2	cyclin G2 [Source:HGNC Symbol;Acc:HGNC:1593]
CDKN2D	cyclin dependent kinase inhibitor 2D [Source:HGNC Symbol;Acc:HGNC:1790]
PLK1	polo like kinase 1 [Source:HGNC Symbol;Acc:HGNC:9077]
PLK2	polo like kinase 2 [Source:HGNC Symbol;Acc:HGNC:19699]
PLK3	polo like kinase 3 [Source:HGNC Symbol;Acc:HGNC:2154]
PLK4	polo like kinase 4 [Source:HGNC Symbol;Acc:HGNC:11397]
TNFSF10	tumor necrosis factor superfamily member 10 [Source:HGNC Symbol;Acc:HGNC:11925]
BCL6	B-cell CLL/lymphoma 6 [Source:HGNC Symbol;Acc:HGNC:1001]
BNIP3	BCL2/adenovirus E1B 19kDa interacting protein 3 [Source:HGNC Symbol;Acc:HGNC:1084]
ATG12	autophagy related 12 [Source:HGNC Symbol;Acc:HGNC:588]
GABARAP	GABA type A receptor-associated protein [Source:HGNC Symbol;Acc:HGNC:4067]
GABARAPL1	GABA type A receptor associated protein like 1 [Source:HGNC Symbol;Acc:HGNC:4068]
GABARAPL2	GABA type A receptor associated protein like 2 [Source:HGNC Symbol;Acc:HGNC:13291]
CAT	catalase [Source:HGNC Symbol;Acc:HGNC:1516]
SOD2	superoxide dismutase 2, mitochondrial [Source:HGNC Symbol;Acc:HGNC:11180]
S1PR1	sphingosine-1-phosphate receptor 1 [Source:HGNC Symbol;Acc:HGNC:3165]
S1PR4	sphingosine-1-phosphate receptor 4 [Source:HGNC Symbol;Acc:HGNC:3170]
RAG1	recombination activating gene 1 [Source:HGNC Symbol;Acc:HGNC:9831]
RAG2	recombination activating gene 2 [Source:HGNC Symbol;Acc:HGNC:9832]
FBXO25	F-box protein 25 [Source:HGNC Symbol;Acc:HGNC:13596]
FBXO32	F-box protein 32 [Source:HGNC Symbol;Acc:HGNC:16731]
PI4KA	phosphatidylinositol 4-kinase alpha [Source:HGNC Symbol;Acc:HGNC:8983]
PI4KB	phosphatidylinositol 4-kinase beta [Source:HGNC Symbol;Acc:HGNC:8984]
PI4K2A	phosphatidylinositol 4-kinase type 2 alpha [Source:HGNC Symbol;Acc:HGNC:30031]
PI4K2B	phosphatidylinositol 4-kinase type 2 beta [Source:HGNC Symbol;Acc:HGNC:18215]
SACM1L	SAC1 suppressor of actin mutations 1-like (yeast) [Source:HGNC Symbol;Acc:HGNC:17059]
INPP5F	inositol polyphosphate-5-phosphatase F [Source:HGNC Symbol;Acc:HGNC:17054]
PIP5K1C	phosphatidylinositol-4-phosphate 5-kinase type 1 gamma [Source:HGNC Symbol;Acc:HGNC:8996]
PIP5K1A	phosphatidylinositol-4-phosphate 5-kinase type 1 alpha [Source:HGNC Symbol;Acc:HGNC:8994]
PIP5K1B	phosphatidylinositol-4-phosphate 5-kinase type 1 beta [Source:HGNC Symbol;Acc:HGNC:8995]
OCRL	OCRL, inositol polyphosphate-5-phosphatase [Source:HGNC Symbol;Acc:HGNC:8108]
INPP5B	inositol polyphosphate-5-phosphatase B [Source:HGNC Symbol;Acc:HGNC:6077]
INPP5E	inositol polyphosphate-5-phosphatase E [Source:HGNC Symbol;Acc:HGNC:21474]
SYNJ1	synaptojanin 1 [Source:HGNC Symbol;Acc:HGNC:11503]
SYNJ2	synaptojanin 2 [Source:HGNC Symbol;Acc:HGNC:11504]
INPP5D	inositol polyphosphate-5-phosphatase D [Source:HGNC Symbol;Acc:HGNC:6079]
INPPL1	inositol polyphosphate phosphatase like 1 [Source:HGNC Symbol;Acc:HGNC:6080]
INPP4A	inositol polyphosphate-4-phosphatase type I A [Source:HGNC Symbol;Acc:HGNC:6074]
INPP4B	inositol polyphosphate-4-phosphatase type II B [Source:HGNC Symbol;Acc:HGNC:6075]
PIKFYVE	phosphoinositide kinase, FYVE-type zinc finger containing [Source:HGNC Symbol;Acc:HGNC:23785]
MTM1	myotubularin 1 [Source:HGNC Symbol;Acc:HGNC:7448]
MTMR1	myotubularin related protein 1 [Source:HGNC Symbol;Acc:HGNC:7449]
MTMR2	myotubularin related protein 2 [Source:HGNC Symbol;Acc:HGNC:7450]
MTMR3	myotubularin related protein 3 [Source:HGNC Symbol;Acc:HGNC:7451]
MTMR4	myotubularin related protein 4 [Source:HGNC Symbol;Acc:HGNC:7452]
MTMR8	myotubularin related protein 8 [Source:HGNC Symbol;Acc:HGNC:16825]
MTMR6	myotubularin related protein 6 [Source:HGNC Symbol;Acc:HGNC:7453]
MTMR7	myotubularin related protein 7 [Source:HGNC Symbol;Acc:HGNC:7454]
MTMR14	myotubularin related protein 14 [Source:HGNC Symbol;Acc:HGNC:26190]
PIP4K2C	phosphatidylinositol-5-phosphate 4-kinase type 2 gamma [Source:HGNC Symbol;Acc:HGNC:23786]
PIP4K2A	phosphatidylinositol-5-phosphate 4-kinase type 2 alpha [Source:HGNC Symbol;Acc:HGNC:8997]
PIP4K2B	phosphatidylinositol-5-phosphate 4-kinase type 2 beta [Source:HGNC Symbol;Acc:HGNC:8998]
PIK3C2G	phosphatidylinositol-4-phosphate 3-kinase catalytic subunit type 2 gamma [Source:HGNC Symbol;Acc:HGNC:8973]
PIK3C2A	phosphatidylinositol-4-phosphate 3-kinase catalytic subunit type 2 alpha [Source:HGNC Symbol;Acc:HGNC:8971]
PIK3C2B	phosphatidylinositol-4-phosphate 3-kinase catalytic subunit type 2 beta [Source:HGNC Symbol;Acc:HGNC:8972]
PLCD1	phospholipase C delta 1 [Source:HGNC Symbol;Acc:HGNC:9060]
PLCD3	phospholipase C delta 3 [Source:HGNC Symbol;Acc:HGNC:9061]
PLCD4	phospholipase C delta 4 [Source:HGNC Symbol;Acc:HGNC:9062]
PLCZ1	phospholipase C zeta 1 [Source:HGNC Symbol;Acc:HGNC:19218]
IPMK	inositol polyphosphate multikinase [Source:HGNC Symbol;Acc:HGNC:20739]
ITPKB	inositol-trisphosphate 3-kinase B [Source:HGNC Symbol;Acc:HGNC:6179]
ITPKA	inositol-trisphosphate 3-kinase A [Source:HGNC Symbol;Acc:HGNC:6178]
ITPKC	inositol-trisphosphate 3-kinase C [Source:HGNC Symbol;Acc:HGNC:14897]
INPP5A	inositol polyphosphate-5-phosphatase A [Source:HGNC Symbol;Acc:HGNC:6076]
ITPK1	inositol-tetrakisphosphate 1-kinase [Source:HGNC Symbol;Acc:HGNC:6177]
IPPK	inositol-pentakisphosphate 2-kinase [Source:HGNC Symbol;Acc:HGNC:14645]
IP6K1	inositol hexakisphosphate kinase 1 [Source:HGNC Symbol;Acc:HGNC:18360]
IP6K2	inositol hexakisphosphate kinase 2 [Source:HGNC Symbol;Acc:HGNC:17313]
IP6K3	inositol hexakisphosphate kinase 3 [Source:HGNC Symbol;Acc:HGNC:17269]
PPIP5K1	diphosphoinositol pentakisphosphate kinase 1 [Source:HGNC Symbol;Acc:HGNC:29023]
PPIP5K2	diphosphoinositol pentakisphosphate kinase 2 [Source:HGNC Symbol;Acc:HGNC:29035]
INPP1	inositol polyphosphate-1-phosphatase [Source:HGNC Symbol;Acc:HGNC:6071]
IMPA2	inositol monophosphatase 2 [Source:HGNC Symbol;Acc:HGNC:6051]
IMPA1	inositol monophosphatase 1 [Source:HGNC Symbol;Acc:HGNC:6050]
DGKZ	diacylglycerol kinase zeta [Source:HGNC Symbol;Acc:HGNC:2857]
DGKD	diacylglycerol kinase delta [Source:HGNC Symbol;Acc:HGNC:2851]
DGKI	diacylglycerol kinase iota [Source:HGNC Symbol;Acc:HGNC:2855]
DGKA	diacylglycerol kinase alpha [Source:HGNC Symbol;Acc:HGNC:2849]
DGKE	diacylglycerol kinase epsilon [Source:HGNC Symbol;Acc:HGNC:2852]
DGKB	diacylglycerol kinase beta [Source:HGNC Symbol;Acc:HGNC:2850]
DGKH	diacylglycerol kinase eta [Source:HGNC Symbol;Acc:HGNC:2854]
DGKG	diacylglycerol kinase gamma [Source:HGNC Symbol;Acc:HGNC:2853]
DGKQ	diacylglycerol kinase theta [Source:HGNC Symbol;Acc:HGNC:2856]
DGKK	diacylglycerol kinase kappa [Source:HGNC Symbol;Acc:HGNC:32395]
CDS1	CDP-diacylglycerol synthase 1 [Source:HGNC Symbol;Acc:HGNC:1800]
CDS2	CDP-diacylglycerol synthase 2 [Source:HGNC Symbol;Acc:HGNC:1801]
CDIPT	CDP-diacylglycerol--inositol 3-phosphatidyltransferase [Source:HGNC Symbol;Acc:HGNC:1769]
IMPAD1	inositol monophosphatase domain containing 1 [Source:HGNC Symbol;Acc:HGNC:26019]
TMEM55B	transmembrane protein 55B [Source:HGNC Symbol;Acc:HGNC:19299]
TMEM55A	transmembrane protein 55A [Source:HGNC Symbol;Acc:HGNC:25452]
SLC7A5	solute carrier family 7 member 5 [Source:HGNC Symbol;Acc:HGNC:11063]
SLC3A2	solute carrier family 3 member 2 [Source:HGNC Symbol;Acc:HGNC:11026]
SLC38A9	solute carrier family 38 member 9 [Source:HGNC Symbol;Acc:HGNC:26907]
ATP6V1A	ATPase H+ transporting V1 subunit A [Source:HGNC Symbol;Acc:HGNC:851]
ATP6V1B1	ATPase H+ transporting V1 subunit B1 [Source:HGNC Symbol;Acc:HGNC:853]
ATP6V1B2	ATPase H+ transporting V1 subunit B2 [Source:HGNC Symbol;Acc:HGNC:854]
ATP6V1C2	ATPase H+ transporting V1 subunit C2 [Source:HGNC Symbol;Acc:HGNC:18264]
ATP6V1C1	ATPase H+ transporting V1 subunit C1 [Source:HGNC Symbol;Acc:HGNC:856]
ATP6V1D	ATPase H+ transporting V1 subunit D [Source:HGNC Symbol;Acc:HGNC:13527]
ATP6V1E2	ATPase H+ transporting V1 subunit E2 [Source:HGNC Symbol;Acc:HGNC:18125]
ATP6V1E1	ATPase H+ transporting V1 subunit E1 [Source:HGNC Symbol;Acc:HGNC:857]
ATP6V1F	ATPase H+ transporting V1 subunit F [Source:HGNC Symbol;Acc:HGNC:16832]
ATP6V1G1	ATPase H+ transporting V1 subunit G1 [Source:HGNC Symbol;Acc:HGNC:864]
ATP6V1G3	ATPase H+ transporting V1 subunit G3 [Source:HGNC Symbol;Acc:HGNC:18265]
ATP6V1G2	ATPase H+ transporting V1 subunit G2 [Source:HGNC Symbol;Acc:HGNC:862]
ATP6V1H	ATPase H+ transporting V1 subunit H [Source:HGNC Symbol;Acc:HGNC:18303]
LAMTOR1	late endosomal/lysosomal adaptor, MAPK and MTOR activator 1 [Source:HGNC Symbol;Acc:HGNC:26068]
LAMTOR2	late endosomal/lysosomal adaptor, MAPK and MTOR activator 2 [Source:HGNC Symbol;Acc:HGNC:29796]
LAMTOR4	late endosomal/lysosomal adaptor, MAPK and MTOR activator 4 [Source:HGNC Symbol;Acc:HGNC:33772]
LAMTOR5	late endosomal/lysosomal adaptor, MAPK and MTOR activator 5 [Source:HGNC Symbol;Acc:HGNC:17955]
FLCN	folliculin [Source:HGNC Symbol;Acc:HGNC:27310]
FNIP1	folliculin interacting protein 1 [Source:HGNC Symbol;Acc:HGNC:29418]
FNIP2	folliculin interacting protein 2 [Source:HGNC Symbol;Acc:HGNC:29280]
RRAGA	Ras related GTP binding A [Source:HGNC Symbol;Acc:HGNC:16963]
RRAGB	Ras related GTP binding B [Source:HGNC Symbol;Acc:HGNC:19901]
RRAGC	Ras related GTP binding C [Source:HGNC Symbol;Acc:HGNC:19902]
RRAGD	Ras related GTP binding D [Source:HGNC Symbol;Acc:HGNC:19903]
SESN2	sestrin 2 [Source:HGNC Symbol;Acc:HGNC:20746]
MIOS	meiosis regulator for oocyte development [Source:HGNC Symbol;Acc:HGNC:21905]
SEH1L	SEH1 like nucleoporin [Source:HGNC Symbol;Acc:HGNC:30379]
WDR24	WD repeat domain 24 [Source:HGNC Symbol;Acc:HGNC:20852]
WDR59	WD repeat domain 59 [Source:HGNC Symbol;Acc:HGNC:25706]
SEC13	SEC13 homolog, nuclear pore and COPII coat complex component [Source:HGNC Symbol;Acc:HGNC:10697]
DEPDC5	DEP domain containing 5 [Source:HGNC Symbol;Acc:HGNC:18423]
NPRL2	NPR2-like, GATOR1 complex subunit [Source:HGNC Symbol;Acc:HGNC:24969]
NPRL3	NPR3 like, GATOR1 complex subunit [Source:HGNC Symbol;Acc:HGNC:14124]
RNF152	ring finger protein 152 [Source:HGNC Symbol;Acc:HGNC:26811]
DEPTOR	DEP domain containing MTOR-interacting protein [Source:HGNC Symbol;Acc:HGNC:22953]
TELO2	telomere maintenance 2 [Source:HGNC Symbol;Acc:HGNC:29099]
TTI1	TELO2 interacting protein 1 [Source:HGNC Symbol;Acc:HGNC:29029]
CLIP1	CAP-Gly domain containing linker protein 1 [Source:HGNC Symbol;Acc:HGNC:10461]
GRB10	growth factor receptor bound protein 10 [Source:HGNC Symbol;Acc:HGNC:4564]
LPIN1	lipin 1 [Source:HGNC Symbol;Acc:HGNC:13345]
LPIN3	lipin 3 [Source:HGNC Symbol;Acc:HGNC:14451]
LPIN2	lipin 2 [Source:HGNC Symbol;Acc:HGNC:14450]
ULK2	unc-51 like autophagy activating kinase 2 [Source:HGNC Symbol;Acc:HGNC:13480]
TBC1D7	TBC1 domain family member 7 [Source:HGNC Symbol;Acc:HGNC:21066]
MAPKAP1	mitogen-activated protein kinase associated protein 1 [Source:HGNC Symbol;Acc:HGNC:18752]
RICTOR	RPTOR independent companion of MTOR complex 2 [Source:HGNC Symbol;Acc:HGNC:28611]
PRR5	proline rich 5 [Source:HGNC Symbol;Acc:HGNC:31682]
GATSL3	GATS protein-like 3 [Source:HGNC Symbol;Acc:HGNC:34423]
GATSL2	GATS protein-like 2 [Source:HGNC Symbol;Acc:HGNC:37073]
CHEK2	checkpoint kinase 2 [Source:HGNC Symbol;Acc:HGNC:16627]
ATR	ATR serine/threonine kinase [Source:HGNC Symbol;Acc:HGNC:882]
CHEK1	checkpoint kinase 1 [Source:HGNC Symbol;Acc:HGNC:1925]
GORAB	golgin, RAB6 interacting [Source:HGNC Symbol;Acc:HGNC:25676]
CDKN2A	cyclin dependent kinase inhibitor 2A [Source:HGNC Symbol;Acc:HGNC:1787]
MDM4	MDM4, p53 regulator [Source:HGNC Symbol;Acc:HGNC:6974]
SFN	stratifin [Source:HGNC Symbol;Acc:HGNC:10773]
RPRM	reprimo, TP53 dependent G2 arrest mediator candidate [Source:HGNC Symbol;Acc:HGNC:24201]
CDK1	cyclin dependent kinase 1 [Source:HGNC Symbol;Acc:HGNC:1722]
GTSE1	G2 and S-phase expressed 1 [Source:HGNC Symbol;Acc:HGNC:13698]
TNFRSF10A	tumor necrosis factor receptor superfamily member 10a [Source:HGNC Symbol;Acc:HGNC:11904]
TNFRSF10B	tumor necrosis factor receptor superfamily member 10b [Source:HGNC Symbol;Acc:HGNC:11905]
BID	BH3 interacting domain death agonist [Source:HGNC Symbol;Acc:HGNC:1050]
BAX	BCL2 associated X protein [Source:HGNC Symbol;Acc:HGNC:959]
PMAIP1	phorbol-12-myristate-13-acetate-induced protein 1 [Source:HGNC Symbol;Acc:HGNC:9108]
TP53AIP1	tumor protein p53 regulated apoptosis inducing protein 1 [Source:HGNC Symbol;Acc:HGNC:29984]
SIVA1	SIVA1 apoptosis inducing factor [Source:HGNC Symbol;Acc:HGNC:17712]
TP53I3	tumor protein p53 inducible protein 3 [Source:HGNC Symbol;Acc:HGNC:19373]
EI24	EI24, autophagy associated transmembrane protein [Source:HGNC Symbol;Acc:HGNC:13276]
SHISA5	shisa family member 5 [Source:HGNC Symbol;Acc:HGNC:30376]
PERP	PERP, TP53 apoptosis effector [Source:HGNC Symbol;Acc:HGNC:17637]
ZMAT3	zinc finger matrin-type 3 [Source:HGNC Symbol;Acc:HGNC:29983]
CYCS	cytochrome c, somatic [Source:HGNC Symbol;Acc:HGNC:19986]
APAF1	apoptotic peptidase activating factor 1 [Source:HGNC Symbol;Acc:HGNC:576]
AIFM2	apoptosis inducing factor, mitochondria associated 2 [Source:HGNC Symbol;Acc:HGNC:21411]
IGFBP3	insulin like growth factor binding protein 3 [Source:HGNC Symbol;Acc:HGNC:5472]
ADGRB1	adhesion G protein-coupled receptor B1 [Source:HGNC Symbol;Acc:HGNC:943]
CD82	CD82 molecule [Source:HGNC Symbol;Acc:HGNC:6210]
SERPINB5	serpin family B member 5 [Source:HGNC Symbol;Acc:HGNC:8949]
DDB2	damage specific DNA binding protein 2 [Source:HGNC Symbol;Acc:HGNC:2718]
RRM2B	ribonucleotide reductase regulatory TP53 inducible subunit M2B [Source:HGNC Symbol;Acc:HGNC:17296]
RRM2	ribonucleotide reductase regulatory subunit M2 [Source:HGNC Symbol;Acc:HGNC:10452]
SESN1	sestrin 1 [Source:HGNC Symbol;Acc:HGNC:21595]
SESN3	sestrin 3 [Source:HGNC Symbol;Acc:HGNC:23060]
STEAP3	STEAP3 metalloreductase [Source:HGNC Symbol;Acc:HGNC:24592]
RCHY1	ring finger and CHY zinc finger domain containing 1 [Source:HGNC Symbol;Acc:HGNC:17479]
CCNG1	cyclin G1 [Source:HGNC Symbol;Acc:HGNC:1592]
PPM1D	protein phosphatase, Mg2+/Mn2+ dependent 1D [Source:HGNC Symbol;Acc:HGNC:9277]
RFWD2	ring finger and WD repeat domain 2 [Source:HGNC Symbol;Acc:HGNC:17440]
CASP6	caspase 6 [Source:HGNC Symbol;Acc:HGNC:1507]
BAK1	BCL2 antagonist/killer 1 [Source:HGNC Symbol;Acc:HGNC:949]
DIABLO	diablo IAP-binding mitochondrial protein [Source:HGNC Symbol;Acc:HGNC:21528]
HTRA2	HtrA serine peptidase 2 [Source:HGNC Symbol;Acc:HGNC:14348]
PRF1	perforin 1 [Source:HGNC Symbol;Acc:HGNC:9360]
GZMB	granzyme B [Source:HGNC Symbol;Acc:HGNC:4709]
TUBA1B	tubulin alpha 1b [Source:HGNC Symbol;Acc:HGNC:18809]
TUBA4A	tubulin alpha 4a [Source:HGNC Symbol;Acc:HGNC:12407]
TUBA3C	tubulin alpha 3c [Source:HGNC Symbol;Acc:HGNC:12408]
TUBA1A	tubulin alpha 1a [Source:HGNC Symbol;Acc:HGNC:20766]
TUBA1C	tubulin alpha 1c [Source:HGNC Symbol;Acc:HGNC:20768]
TUBA8	tubulin alpha 8 [Source:HGNC Symbol;Acc:HGNC:12410]
TUBA3E	tubulin alpha 3e [Source:HGNC Symbol;Acc:HGNC:20765]
TUBA3D	tubulin alpha 3d [Source:HGNC Symbol;Acc:HGNC:24071]
TUBAL3	tubulin alpha like 3 [Source:HGNC Symbol;Acc:HGNC:23534]
SPTA1	spectrin alpha, erythrocytic 1 [Source:HGNC Symbol;Acc:HGNC:11272]
SPTAN1	spectrin alpha, non-erythrocytic 1 [Source:HGNC Symbol;Acc:HGNC:11273]
LMNA	lamin A/C [Source:HGNC Symbol;Acc:HGNC:6636]
LMNB1	lamin B1 [Source:HGNC Symbol;Acc:HGNC:6637]
LMNB2	lamin B2 [Source:HGNC Symbol;Acc:HGNC:6638]
PARP2	poly(ADP-ribose) polymerase 2 [Source:HGNC Symbol;Acc:HGNC:272]
PARP3	poly(ADP-ribose) polymerase family member 3 [Source:HGNC Symbol;Acc:HGNC:273]
PARP4	poly(ADP-ribose) polymerase family member 4 [Source:HGNC Symbol;Acc:HGNC:271]
DFFA	DNA fragmentation factor subunit alpha [Source:HGNC Symbol;Acc:HGNC:2772]
DFFB	DNA fragmentation factor subunit beta [Source:HGNC Symbol;Acc:HGNC:2773]
ENDOG	endonuclease G [Source:HGNC Symbol;Acc:HGNC:3346]
AIFM1	apoptosis inducing factor, mitochondria associated 1 [Source:HGNC Symbol;Acc:HGNC:8768]
ERN1	endoplasmic reticulum to nucleus signaling 1 [Source:HGNC Symbol;Acc:HGNC:3449]
CAPN1	calpain 1 [Source:HGNC Symbol;Acc:HGNC:1476]
CAPN2	calpain 2 [Source:HGNC Symbol;Acc:HGNC:1479]
EIF2AK3	eukaryotic translation initiation factor 2 alpha kinase 3 [Source:HGNC Symbol;Acc:HGNC:3255]
EIF2S1	eukaryotic translation initiation factor 2 subunit alpha [Source:HGNC Symbol;Acc:HGNC:3265]
CTSB	cathepsin B [Source:HGNC Symbol;Acc:HGNC:2527]
CTSC	cathepsin C [Source:HGNC Symbol;Acc:HGNC:2528]
CTSD	cathepsin D [Source:HGNC Symbol;Acc:HGNC:2529]
CTSF	cathepsin F [Source:HGNC Symbol;Acc:HGNC:2531]
CTSH	cathepsin H [Source:HGNC Symbol;Acc:HGNC:2535]
CTSK	cathepsin K [Source:HGNC Symbol;Acc:HGNC:2536]
CTSL	cathepsin L [Source:HGNC Symbol;Acc:HGNC:2537]
CTSO	cathepsin O [Source:HGNC Symbol;Acc:HGNC:2542]
CTSS	cathepsin S [Source:HGNC Symbol;Acc:HGNC:2545]
CTSV	cathepsin V [Source:HGNC Symbol;Acc:HGNC:2538]
CTSW	cathepsin W [Source:HGNC Symbol;Acc:HGNC:2546]
CTSZ	cathepsin Z [Source:HGNC Symbol;Acc:HGNC:2547]
HRK	harakiri, BCL2 interacting protein [Source:HGNC Symbol;Acc:HGNC:5185]
PTPN13	protein tyrosine phosphatase, non-receptor type 13 [Source:HGNC Symbol;Acc:HGNC:9646]
CASP2	caspase 2 [Source:HGNC Symbol;Acc:HGNC:1503]
C17orf47	chromosome 17 open reading frame 47 [Source:HGNC Symbol;Acc:HGNC:26844]
UBB	ubiquitin B [Source:HGNC Symbol;Acc:HGNC:12463]
UBC	ubiquitin C [Source:HGNC Symbol;Acc:HGNC:12468]
UBA52	ubiquitin A-52 residue ribosomal protein fusion product 1 [Source:HGNC Symbol;Acc:HGNC:12458]
RPS27A	ribosomal protein S27a [Source:HGNC Symbol;Acc:HGNC:10417]
UBA1	ubiquitin like modifier activating enzyme 1 [Source:HGNC Symbol;Acc:HGNC:12469]
SAE1	SUMO1 activating enzyme subunit 1 [Source:HGNC Symbol;Acc:HGNC:30660]
UBA2	ubiquitin like modifier activating enzyme 2 [Source:HGNC Symbol;Acc:HGNC:30661]
UBA3	ubiquitin like modifier activating enzyme 3 [Source:HGNC Symbol;Acc:HGNC:12470]
UBA7	ubiquitin like modifier activating enzyme 7 [Source:HGNC Symbol;Acc:HGNC:12471]
UBA6	ubiquitin like modifier activating enzyme 6 [Source:HGNC Symbol;Acc:HGNC:25581]
UBE2A	ubiquitin conjugating enzyme E2 A [Source:HGNC Symbol;Acc:HGNC:12472]
UBE2B	ubiquitin conjugating enzyme E2 B [Source:HGNC Symbol;Acc:HGNC:12473]
UBE2C	ubiquitin conjugating enzyme E2 C [Source:HGNC Symbol;Acc:HGNC:15937]
UBE2D4	ubiquitin conjugating enzyme E2 D4 (putative) [Source:HGNC Symbol;Acc:HGNC:21647]
UBE2D1	ubiquitin conjugating enzyme E2 D1 [Source:HGNC Symbol;Acc:HGNC:12474]
UBE2D2	ubiquitin conjugating enzyme E2 D2 [Source:HGNC Symbol;Acc:HGNC:12475]
UBE2D3	ubiquitin conjugating enzyme E2 D3 [Source:HGNC Symbol;Acc:HGNC:12476]
UBE2E3	ubiquitin conjugating enzyme E2 E3 [Source:HGNC Symbol;Acc:HGNC:12479]
UBE2E1	ubiquitin conjugating enzyme E2 E1 [Source:HGNC Symbol;Acc:HGNC:12477]
UBE2E2	ubiquitin conjugating enzyme E2 E2 [Source:HGNC Symbol;Acc:HGNC:12478]
UBE2F	ubiquitin conjugating enzyme E2 F (putative) [Source:HGNC Symbol;Acc:HGNC:12480]
UBE2G1	ubiquitin conjugating enzyme E2 G1 [Source:HGNC Symbol;Acc:HGNC:12482]
UBE2G2	ubiquitin conjugating enzyme E2 G2 [Source:HGNC Symbol;Acc:HGNC:12483]
UBE2H	ubiquitin conjugating enzyme E2 H [Source:HGNC Symbol;Acc:HGNC:12484]
UBE2J1	ubiquitin conjugating enzyme E2 J1 [Source:HGNC Symbol;Acc:HGNC:17598]
UBE2J2	ubiquitin conjugating enzyme E2 J2 [Source:HGNC Symbol;Acc:HGNC:19268]
UBE2L3	ubiquitin conjugating enzyme E2 L3 [Source:HGNC Symbol;Acc:HGNC:12488]
UBE2L6	ubiquitin conjugating enzyme E2 L6 [Source:HGNC Symbol;Acc:HGNC:12490]
UBE2M	ubiquitin conjugating enzyme E2 M [Source:HGNC Symbol;Acc:HGNC:12491]
UBE2N	ubiquitin conjugating enzyme E2 N [Source:HGNC Symbol;Acc:HGNC:12492]
UBE2O	ubiquitin conjugating enzyme E2 O [Source:HGNC Symbol;Acc:HGNC:29554]
UBE2Q1	ubiquitin conjugating enzyme E2 Q1 [Source:HGNC Symbol;Acc:HGNC:15698]
UBE2Q2	ubiquitin conjugating enzyme E2 Q2 [Source:HGNC Symbol;Acc:HGNC:19248]
UBE2QL1	ubiquitin conjugating enzyme E2 Q family like 1 [Source:HGNC Symbol;Acc:HGNC:37269]
UBE2R2	ubiquitin conjugating enzyme E2 R2 [Source:HGNC Symbol;Acc:HGNC:19907]
CDC34	cell division cycle 34 [Source:HGNC Symbol;Acc:HGNC:1734]
UBE2S	ubiquitin conjugating enzyme E2 S [Source:HGNC Symbol;Acc:HGNC:17895]
UBE2U	ubiquitin conjugating enzyme E2 U (putative) [Source:HGNC Symbol;Acc:HGNC:28559]
UBE2W	ubiquitin conjugating enzyme E2 W (putative) [Source:HGNC Symbol;Acc:HGNC:25616]
UBE2Z	ubiquitin conjugating enzyme E2 Z [Source:HGNC Symbol;Acc:HGNC:25847]
UBE2K	ubiquitin conjugating enzyme E2 K [Source:HGNC Symbol;Acc:HGNC:4914]
BIRC6	baculoviral IAP repeat containing 6 [Source:HGNC Symbol;Acc:HGNC:13516]
UBE3A	ubiquitin protein ligase E3A [Source:HGNC Symbol;Acc:HGNC:12496]
UBE3B	ubiquitin protein ligase E3B [Source:HGNC Symbol;Acc:HGNC:13478]
UBE3C	ubiquitin protein ligase E3C [Source:HGNC Symbol;Acc:HGNC:16803]
WWP1	WW domain containing E3 ubiquitin protein ligase 1 [Source:HGNC Symbol;Acc:HGNC:17004]
WWP2	WW domain containing E3 ubiquitin protein ligase 2 [Source:HGNC Symbol;Acc:HGNC:16804]
TRIP12	thyroid hormone receptor interactor 12 [Source:HGNC Symbol;Acc:HGNC:12306]
NEDD4	neural precursor cell expressed, developmentally down-regulated 4, E3 ubiquitin protein ligase [Source:HGNC Symbol;Acc:HGNC:7727]
NEDD4L	neural precursor cell expressed, developmentally down-regulated 4-like, E3 ubiquitin protein ligase [Source:HGNC Symbol;Acc:HGNC:7728]
HUWE1	HECT, UBA and WWE domain containing 1, E3 ubiquitin protein ligase [Source:HGNC Symbol;Acc:HGNC:30892]
UBR5	ubiquitin protein ligase E3 component n-recognin 5 [Source:HGNC Symbol;Acc:HGNC:16806]
HERC1	HECT and RLD domain containing E3 ubiquitin protein ligase family member 1 [Source:HGNC Symbol;Acc:HGNC:4867]
HERC2	HECT and RLD domain containing E3 ubiquitin protein ligase 2 [Source:HGNC Symbol;Acc:HGNC:4868]
HERC3	HECT and RLD domain containing E3 ubiquitin protein ligase 3 [Source:HGNC Symbol;Acc:HGNC:4876]
HERC4	HECT and RLD domain containing E3 ubiquitin protein ligase 4 [Source:HGNC Symbol;Acc:HGNC:24521]
UBE4A	ubiquitination factor E4A [Source:HGNC Symbol;Acc:HGNC:12499]
UBE4B	ubiquitination factor E4B [Source:HGNC Symbol;Acc:HGNC:12500]
STUB1	STIP1 homology and U-box containing protein 1 [Source:HGNC Symbol;Acc:HGNC:11427]
PPIL2	peptidylprolyl isomerase like 2 [Source:HGNC Symbol;Acc:HGNC:9261]
PRPF19	pre-mRNA processing factor 19 [Source:HGNC Symbol;Acc:HGNC:17896]
UBOX5	U-box domain containing 5 [Source:HGNC Symbol;Acc:HGNC:17777]
CBL	Cbl proto-oncogene [Source:HGNC Symbol;Acc:HGNC:1541]
CBLB	Cbl proto-oncogene B [Source:HGNC Symbol;Acc:HGNC:1542]
CBLC	Cbl proto-oncogene C [Source:HGNC Symbol;Acc:HGNC:15961]
PML	promyelocytic leukemia [Source:HGNC Symbol;Acc:HGNC:9113]
BIRC7	baculoviral IAP repeat containing 7 [Source:HGNC Symbol;Acc:HGNC:13702]
SYVN1	synoviolin 1 [Source:HGNC Symbol;Acc:HGNC:20738]
NHLRC1	NHL repeat containing E3 ubiquitin protein ligase 1 [Source:HGNC Symbol;Acc:HGNC:21576]
AIRE	autoimmune regulator [Source:HGNC Symbol;Acc:HGNC:360]
FANCL	Fanconi anemia complementation group L [Source:HGNC Symbol;Acc:HGNC:20748]
MID1	midline 1 [Source:HGNC Symbol;Acc:HGNC:7095]
TRIM32	tripartite motif containing 32 [Source:HGNC Symbol;Acc:HGNC:16380]
TRIM37	tripartite motif containing 37 [Source:HGNC Symbol;Acc:HGNC:7523]
FBXW7	F-box and WD repeat domain containing 7 [Source:HGNC Symbol;Acc:HGNC:16712]
FBXO2	F-box protein 2 [Source:HGNC Symbol;Acc:HGNC:13581]
FBXO4	F-box protein 4 [Source:HGNC Symbol;Acc:HGNC:13583]
KEAP1	kelch like ECH associated protein 1 [Source:HGNC Symbol;Acc:HGNC:23177]
KLHL9	kelch like family member 9 [Source:HGNC Symbol;Acc:HGNC:18732]
KLHL13	kelch like family member 13 [Source:HGNC Symbol;Acc:HGNC:22931]
RHOBTB2	Rho related BTB domain containing 2 [Source:HGNC Symbol;Acc:HGNC:18756]
RHOBTB1	Rho related BTB domain containing 1 [Source:HGNC Symbol;Acc:HGNC:18738]
CUL4B	cullin 4B [Source:HGNC Symbol;Acc:HGNC:2555]
CUL4A	cullin 4A [Source:HGNC Symbol;Acc:HGNC:2554]
DDB1	damage specific DNA binding protein 1 [Source:HGNC Symbol;Acc:HGNC:2717]
ERCC8	ERCC excision repair 8, CSA ubiquitin ligase complex subunit [Source:HGNC Symbol;Acc:HGNC:3439]
DET1	de-etiolated homolog 1 (Arabidopsis) [Source:HGNC Symbol;Acc:HGNC:25477]
RNF7	ring finger protein 7 [Source:HGNC Symbol;Acc:HGNC:10070]
CUL5	cullin 5 [Source:HGNC Symbol;Acc:HGNC:2556]
CUL7	cullin 7 [Source:HGNC Symbol;Acc:HGNC:21024]
FBXW8	F-box and WD repeat domain containing 8 [Source:HGNC Symbol;Acc:HGNC:13597]
ANAPC11	anaphase promoting complex subunit 11 [Source:HGNC Symbol;Acc:HGNC:14452]
ANAPC2	anaphase promoting complex subunit 2 [Source:HGNC Symbol;Acc:HGNC:19989]
CDC20	cell division cycle 20 [Source:HGNC Symbol;Acc:HGNC:1723]
FZR1	fizzy/cell division cycle 20 related 1 [Source:HGNC Symbol;Acc:HGNC:24824]
ANAPC1	anaphase promoting complex subunit 1 [Source:HGNC Symbol;Acc:HGNC:19988]
CDC27	cell division cycle 27 [Source:HGNC Symbol;Acc:HGNC:1728]
ANAPC4	anaphase promoting complex subunit 4 [Source:HGNC Symbol;Acc:HGNC:19990]
ANAPC5	anaphase promoting complex subunit 5 [Source:HGNC Symbol;Acc:HGNC:15713]
CDC16	cell division cycle 16 [Source:HGNC Symbol;Acc:HGNC:1720]
ANAPC7	anaphase promoting complex subunit 7 [Source:HGNC Symbol;Acc:HGNC:17380]
CDC23	cell division cycle 23 [Source:HGNC Symbol;Acc:HGNC:1724]
ANAPC10	anaphase promoting complex subunit 10 [Source:HGNC Symbol;Acc:HGNC:24077]
CDC26	cell division cycle 26 [Source:HGNC Symbol;Acc:HGNC:17839]
ANAPC13	anaphase promoting complex subunit 13 [Source:HGNC Symbol;Acc:HGNC:24540]
ANAPC15	anaphase promoting complex subunit 15 [Source:HGNC Symbol;Acc:HGNC:24531]
ANAPC16	anaphase promoting complex subunit 16 [Source:HGNC Symbol;Acc:HGNC:26976]
PARK2	parkin RBR E3 ubiquitin protein ligase [Source:HGNC Symbol;Acc:HGNC:8607]
TCEB1	transcription elongation factor B subunit 1 [Source:HGNC Symbol;Acc:HGNC:11617]
RB1	RB transcriptional corepressor 1 [Source:HGNC Symbol;Acc:HGNC:9884]
E2F1	E2F transcription factor 1 [Source:HGNC Symbol;Acc:HGNC:3113]
E2F2	E2F transcription factor 2 [Source:HGNC Symbol;Acc:HGNC:3114]
E2F3	E2F transcription factor 3 [Source:HGNC Symbol;Acc:HGNC:3115]
TFDP2	transcription factor Dp-2 [Source:HGNC Symbol;Acc:HGNC:11751]
ZBTB17	zinc finger and BTB domain containing 17 [Source:HGNC Symbol;Acc:HGNC:12936]
CDKN2C	cyclin dependent kinase inhibitor 2C [Source:HGNC Symbol;Acc:HGNC:1789]
CDKN1C	cyclin dependent kinase inhibitor 1C [Source:HGNC Symbol;Acc:HGNC:1786]
CDC6	cell division cycle 6 [Source:HGNC Symbol;Acc:HGNC:1744]
CDC45	cell division cycle 45 [Source:HGNC Symbol;Acc:HGNC:1739]
CDC7	cell division cycle 7 [Source:HGNC Symbol;Acc:HGNC:1745]
DBF4	DBF4 zinc finger [Source:HGNC Symbol;Acc:HGNC:17364]
CDC25C	cell division cycle 25C [Source:HGNC Symbol;Acc:HGNC:1727]
WEE1	WEE1 G2 checkpoint kinase [Source:HGNC Symbol;Acc:HGNC:12761]
WEE2	WEE1 homolog 2 (S. pombe) [Source:HGNC Symbol;Acc:HGNC:19684]
PKMYT1	protein kinase, membrane associated tyrosine/threonine 1 [Source:HGNC Symbol;Acc:HGNC:29650]
CCNH	cyclin H [Source:HGNC Symbol;Acc:HGNC:1594]
CDK7	cyclin dependent kinase 7 [Source:HGNC Symbol;Acc:HGNC:1778]
PTTG1	pituitary tumor-transforming 1 [Source:HGNC Symbol;Acc:HGNC:9690]
PTTG2	pituitary tumor-transforming 2 [Source:HGNC Symbol;Acc:HGNC:9691]
ESPL1	extra spindle pole bodies like 1, separase [Source:HGNC Symbol;Acc:HGNC:16856]
SMC1A	structural maintenance of chromosomes 1A [Source:HGNC Symbol;Acc:HGNC:11111]
SMC1B	structural maintenance of chromosomes 1B [Source:HGNC Symbol;Acc:HGNC:11112]
SMC3	structural maintenance of chromosomes 3 [Source:HGNC Symbol;Acc:HGNC:2468]
STAG2	stromal antigen 2 [Source:HGNC Symbol;Acc:HGNC:11355]
STAG1	stromal antigen 1 [Source:HGNC Symbol;Acc:HGNC:11354]
RAD21	RAD21 cohesin complex component [Source:HGNC Symbol;Acc:HGNC:9811]
TTK	TTK protein kinase [Source:HGNC Symbol;Acc:HGNC:12401]
BUB1	BUB1 mitotic checkpoint serine/threonine kinase [Source:HGNC Symbol;Acc:HGNC:1148]
BUB3	BUB3, mitotic checkpoint protein [Source:HGNC Symbol;Acc:HGNC:1151]
BUB1B	BUB1 mitotic checkpoint serine/threonine kinase B [Source:HGNC Symbol;Acc:HGNC:1149]
MAD1L1	MAD1 mitotic arrest deficient like 1 [Source:HGNC Symbol;Acc:HGNC:6762]
MAD2L1	MAD2 mitotic arrest deficient-like 1 (yeast) [Source:HGNC Symbol;Acc:HGNC:6763]
MAD2L2	MAD2 mitotic arrest deficient-like 2 (yeast) [Source:HGNC Symbol;Acc:HGNC:6764]
CDC14B	cell division cycle 14B [Source:HGNC Symbol;Acc:HGNC:1719]
CDC14A	cell division cycle 14A [Source:HGNC Symbol;Acc:HGNC:1718]
PRKDC	protein kinase, DNA-activated, catalytic polypeptide [Source:HGNC Symbol;Acc:HGNC:9413]
PCNA	proliferating cell nuclear antigen [Source:HGNC Symbol;Acc:HGNC:8729]
CDC25A	cell division cycle 25A [Source:HGNC Symbol;Acc:HGNC:1725]
ORC1	origin recognition complex subunit 1 [Source:HGNC Symbol;Acc:HGNC:8487]
ORC2	origin recognition complex subunit 2 [Source:HGNC Symbol;Acc:HGNC:8488]
ORC3	origin recognition complex subunit 3 [Source:HGNC Symbol;Acc:HGNC:8489]
ORC4	origin recognition complex subunit 4 [Source:HGNC Symbol;Acc:HGNC:8490]
ORC5	origin recognition complex subunit 5 [Source:HGNC Symbol;Acc:HGNC:8491]
ORC6	origin recognition complex subunit 6 [Source:HGNC Symbol;Acc:HGNC:17151]
MCM2	minichromosome maintenance complex component 2 [Source:HGNC Symbol;Acc:HGNC:6944]
MCM3	minichromosome maintenance complex component 3 [Source:HGNC Symbol;Acc:HGNC:6945]
MCM4	minichromosome maintenance complex component 4 [Source:HGNC Symbol;Acc:HGNC:6947]
MCM5	minichromosome maintenance complex component 5 [Source:HGNC Symbol;Acc:HGNC:6948]
MCM6	minichromosome maintenance complex component 6 [Source:HGNC Symbol;Acc:HGNC:6949]
MCM7	minichromosome maintenance complex component 7 [Source:HGNC Symbol;Acc:HGNC:6950]
CXCR4	C-X-C motif chemokine receptor 4 [Source:HGNC Symbol;Acc:HGNC:2561]
F2	coagulation factor II, thrombin [Source:HGNC Symbol;Acc:HGNC:3535]
INSRR	insulin receptor related receptor [Source:HGNC Symbol;Acc:HGNC:6093]
ITGAX	integrin subunit alpha X [Source:HGNC Symbol;Acc:HGNC:6152]
ITGAD	integrin subunit alpha D [Source:HGNC Symbol;Acc:HGNC:6146]
ITGAE	integrin subunit alpha E [Source:HGNC Symbol;Acc:HGNC:6147]
KNG1	kininogen 1 [Source:HGNC Symbol;Acc:HGNC:6383]
BDKRB1	bradykinin receptor B1 [Source:HGNC Symbol;Acc:HGNC:1029]
BDKRB2	bradykinin receptor B2 [Source:HGNC Symbol;Acc:HGNC:1030]
CHRM3	cholinergic receptor muscarinic 3 [Source:HGNC Symbol;Acc:HGNC:1952]
CHRM4	cholinergic receptor muscarinic 4 [Source:HGNC Symbol;Acc:HGNC:1953]
CHRM5	cholinergic receptor muscarinic 5 [Source:HGNC Symbol;Acc:HGNC:1954]
FGD1	FYVE, RhoGEF and PH domain containing 1 [Source:HGNC Symbol;Acc:HGNC:3663]
FGD3	FYVE, RhoGEF and PH domain containing 3 [Source:HGNC Symbol;Acc:HGNC:16027]
DOCK1	dedicator of cytokinesis 1 [Source:HGNC Symbol;Acc:HGNC:2987]
ARHGEF6	Rac/Cdc42 guanine nucleotide exchange factor 6 [Source:HGNC Symbol;Acc:HGNC:685]
MOS	v-mos Moloney murine sarcoma viral oncogene homolog [Source:HGNC Symbol;Acc:HGNC:7199]
ARHGEF1	Rho guanine nucleotide exchange factor 1 [Source:HGNC Symbol;Acc:HGNC:681]
ARHGEF12	Rho guanine nucleotide exchange factor 12 [Source:HGNC Symbol;Acc:HGNC:14193]
ARHGAP35	Rho GTPase activating protein 35 [Source:HGNC Symbol;Acc:HGNC:4591]
ARHGEF7	Rho guanine nucleotide exchange factor 7 [Source:HGNC Symbol;Acc:HGNC:15607]
GIT1	GIT ArfGAP 1 [Source:HGNC Symbol;Acc:HGNC:4272]
PPP1R12A	protein phosphatase 1 regulatory subunit 12A [Source:HGNC Symbol;Acc:HGNC:7618]
PPP1R12B	protein phosphatase 1 regulatory subunit 12B [Source:HGNC Symbol;Acc:HGNC:7619]
PPP1R12C	protein phosphatase 1 regulatory subunit 12C [Source:HGNC Symbol;Acc:HGNC:14947]
MYL5	myosin light chain 5 [Source:HGNC Symbol;Acc:HGNC:7586]
MYL7	myosin light chain 7 [Source:HGNC Symbol;Acc:HGNC:21719]
MYL9	myosin light chain 9 [Source:HGNC Symbol;Acc:HGNC:15754]
MYL10	myosin light chain 10 [Source:HGNC Symbol;Acc:HGNC:29825]
MYL12B	myosin light chain 12B [Source:HGNC Symbol;Acc:HGNC:29827]
MYL12A	myosin light chain 12A [Source:HGNC Symbol;Acc:HGNC:16701]
MYLPF	myosin light chain, phosphorylatable, fast skeletal muscle [Source:HGNC Symbol;Acc:HGNC:29824]
MYH9	myosin, heavy chain 9, non-muscle [Source:HGNC Symbol;Acc:HGNC:7579]
MYH10	myosin, heavy chain 10, non-muscle [Source:HGNC Symbol;Acc:HGNC:7568]
MYH11	myosin, heavy chain 11, smooth muscle [Source:HGNC Symbol;Acc:HGNC:7569]
MYH14	myosin, heavy chain 14, non-muscle [Source:HGNC Symbol;Acc:HGNC:23212]
DIAPH1	diaphanous related formin 1 [Source:HGNC Symbol;Acc:HGNC:2876]
DIAPH2	diaphanous related formin 2 [Source:HGNC Symbol;Acc:HGNC:2877]
LIMK1	LIM domain kinase 1 [Source:HGNC Symbol;Acc:HGNC:6613]
LIMK2	LIM domain kinase 2 [Source:HGNC Symbol;Acc:HGNC:6614]
DIAPH3	diaphanous related formin 3 [Source:HGNC Symbol;Acc:HGNC:15480]
BAIAP2	BAI1 associated protein 2 [Source:HGNC Symbol;Acc:HGNC:947]
WASL	Wiskott-Aldrich syndrome like [Source:HGNC Symbol;Acc:HGNC:12735]
WASF2	WAS protein family member 2 [Source:HGNC Symbol;Acc:HGNC:12733]
CYFIP1	cytoplasmic FMR1 interacting protein 1 [Source:HGNC Symbol;Acc:HGNC:13759]
CYFIP2	cytoplasmic FMR1 interacting protein 2 [Source:HGNC Symbol;Acc:HGNC:13760]
NCKAP1	NCK associated protein 1 [Source:HGNC Symbol;Acc:HGNC:7666]
NCKAP1L	NCK associated protein 1 like [Source:HGNC Symbol;Acc:HGNC:4862]
ABI2	abl interactor 2 [Source:HGNC Symbol;Acc:HGNC:24011]
BRK1	BRICK1, SCAR/WAVE actin nucleating complex subunit [Source:HGNC Symbol;Acc:HGNC:23057]
WASF1	WAS protein family member 1 [Source:HGNC Symbol;Acc:HGNC:12732]
ACTR2	ARP2 actin-related protein 2 homolog (yeast) [Source:HGNC Symbol;Acc:HGNC:169]
ACTR3B	ARP3 actin-related protein 3 homolog B (yeast) [Source:HGNC Symbol;Acc:HGNC:17256]
ACTR3C	ARP3 actin-related protein 3 homolog C [Source:HGNC Symbol;Acc:HGNC:37282]
ACTR3	ARP3 actin-related protein 3 homolog (yeast) [Source:HGNC Symbol;Acc:HGNC:170]
ARPC1B	actin related protein 2/3 complex subunit 1B [Source:HGNC Symbol;Acc:HGNC:704]
ARPC1A	actin related protein 2/3 complex subunit 1A [Source:HGNC Symbol;Acc:HGNC:703]
ARPC2	actin related protein 2/3 complex subunit 2 [Source:HGNC Symbol;Acc:HGNC:705]
ARPC3	actin related protein 2/3 complex subunit 3 [Source:HGNC Symbol;Acc:HGNC:706]
ARPC4	actin related protein 2/3 complex subunit 4 [Source:HGNC Symbol;Acc:HGNC:707]
ARPC5	actin related protein 2/3 complex subunit 5 [Source:HGNC Symbol;Acc:HGNC:708]
ARPC5L	actin related protein 2/3 complex subunit 5 like [Source:HGNC Symbol;Acc:HGNC:23366]
EZR	ezrin [Source:HGNC Symbol;Acc:HGNC:12691]
RDX	radixin [Source:HGNC Symbol;Acc:HGNC:9944]
MSN	moesin [Source:HGNC Symbol;Acc:HGNC:7373]
TMSB4X	thymosin beta 4, X-linked [Source:HGNC Symbol;Acc:HGNC:11881]
TMSB4Y	thymosin beta 4, Y-linked [Source:HGNC Symbol;Acc:HGNC:11882]
CFL1	cofilin 1 [Source:HGNC Symbol;Acc:HGNC:1874]
CFL2	cofilin 2 [Source:HGNC Symbol;Acc:HGNC:1875]
SSH1	slingshot protein phosphatase 1 [Source:HGNC Symbol;Acc:HGNC:30579]
SSH3	slingshot protein phosphatase 3 [Source:HGNC Symbol;Acc:HGNC:30581]
SSH2	slingshot protein phosphatase 2 [Source:HGNC Symbol;Acc:HGNC:30580]
VCL	vinculin [Source:HGNC Symbol;Acc:HGNC:12665]
IQGAP1	IQ motif containing GTPase activating protein 1 [Source:HGNC Symbol;Acc:HGNC:6110]
IQGAP2	IQ motif containing GTPase activating protein 2 [Source:HGNC Symbol;Acc:HGNC:6111]
IQGAP3	IQ motif containing GTPase activating protein 3 [Source:HGNC Symbol;Acc:HGNC:20669]
GSN	gelsolin [Source:HGNC Symbol;Acc:HGNC:4620]
SCIN	scinderin [Source:HGNC Symbol;Acc:HGNC:21695]
ACTN1	actinin alpha 1 [Source:HGNC Symbol;Acc:HGNC:163]
ACTN4	actinin alpha 4 [Source:HGNC Symbol;Acc:HGNC:166]
ARHGEF4	Rho guanine nucleotide exchange factor 4 [Source:HGNC Symbol;Acc:HGNC:684]
SPATA13	spermatogenesis associated 13 [Source:HGNC Symbol;Acc:HGNC:23222]
ATP2B1	ATPase plasma membrane Ca2+ transporting 1 [Source:HGNC Symbol;Acc:HGNC:814]
ATP2B3	ATPase plasma membrane Ca2+ transporting 3 [Source:HGNC Symbol;Acc:HGNC:816]
ATP2B4	ATPase plasma membrane Ca2+ transporting 4 [Source:HGNC Symbol;Acc:HGNC:817]
ATP2B2	ATPase plasma membrane Ca2+ transporting 2 [Source:HGNC Symbol;Acc:HGNC:815]
ADRB1	adrenoceptor beta 1 [Source:HGNC Symbol;Acc:HGNC:285]
ADRB2	adrenoceptor beta 2 [Source:HGNC Symbol;Acc:HGNC:286]
ADRB3	adrenoceptor beta 3 [Source:HGNC Symbol;Acc:HGNC:288]
DRD1	dopamine receptor D1 [Source:HGNC Symbol;Acc:HGNC:3020]
DRD5	dopamine receptor D5 [Source:HGNC Symbol;Acc:HGNC:3026]
HRH2	histamine receptor H2 [Source:HGNC Symbol;Acc:HGNC:5183]
HTR4	5-hydroxytryptamine receptor 4 [Source:HGNC Symbol;Acc:HGNC:5299]
HTR5A	5-hydroxytryptamine receptor 5A [Source:HGNC Symbol;Acc:HGNC:5300]
HTR6	5-hydroxytryptamine receptor 6 [Source:HGNC Symbol;Acc:HGNC:5301]
GNAL	G protein subunit alpha L [Source:HGNC Symbol;Acc:HGNC:4388]
PLN	phospholamban [Source:HGNC Symbol;Acc:HGNC:9080]
ATP2A1	ATPase sarcoplasmic/endoplasmic reticulum Ca2+ transporting 1 [Source:HGNC Symbol;Acc:HGNC:811]
ATP2A3	ATPase sarcoplasmic/endoplasmic reticulum Ca2+ transporting 3 [Source:HGNC Symbol;Acc:HGNC:813]
ATP2A2	ATPase sarcoplasmic/endoplasmic reticulum Ca2+ transporting 2 [Source:HGNC Symbol;Acc:HGNC:812]
HRC	histidine rich calcium binding protein [Source:HGNC Symbol;Acc:HGNC:5178]
STIM1	stromal interaction molecule 1 [Source:HGNC Symbol;Acc:HGNC:11386]
STIM2	stromal interaction molecule 2 [Source:HGNC Symbol;Acc:HGNC:19205]
ORAI1	ORAI calcium release-activated calcium modulator 1 [Source:HGNC Symbol;Acc:HGNC:25896]
ORAI2	ORAI calcium release-activated calcium modulator 2 [Source:HGNC Symbol;Acc:HGNC:21667]
ORAI3	ORAI calcium release-activated calcium modulator 3 [Source:HGNC Symbol;Acc:HGNC:28185]
CHRNA7	cholinergic receptor nicotinic alpha 7 subunit [Source:HGNC Symbol;Acc:HGNC:1960]
P2RX1	purinergic receptor P2X 1 [Source:HGNC Symbol;Acc:HGNC:8533]
P2RX2	purinergic receptor P2X 2 [Source:HGNC Symbol;Acc:HGNC:15459]
P2RX3	purinergic receptor P2X 3 [Source:HGNC Symbol;Acc:HGNC:8534]
P2RX4	purinergic receptor P2X 4 [Source:HGNC Symbol;Acc:HGNC:8535]
P2RX5	purinergic receptor P2X 5 [Source:HGNC Symbol;Acc:HGNC:8536]
P2RX7	purinergic receptor P2X 7 [Source:HGNC Symbol;Acc:HGNC:8537]
P2RX6	purinergic receptor P2X 6 [Source:HGNC Symbol;Acc:HGNC:8538]
GRIN2C	glutamate ionotropic receptor NMDA type subunit 2C [Source:HGNC Symbol;Acc:HGNC:4587]
GRIN2D	glutamate ionotropic receptor NMDA type subunit 2D [Source:HGNC Symbol;Acc:HGNC:4588]
TRDN	triadin [Source:HGNC Symbol;Acc:HGNC:12261]
CASQ1	calsequestrin 1 [Source:HGNC Symbol;Acc:HGNC:1512]
CASQ2	calsequestrin 2 [Source:HGNC Symbol;Acc:HGNC:1513]
ASPH	aspartate beta-hydroxylase [Source:HGNC Symbol;Acc:HGNC:757]
CYSLTR1	cysteinyl leukotriene receptor 1 [Source:HGNC Symbol;Acc:HGNC:17451]
CYSLTR2	cysteinyl leukotriene receptor 2 [Source:HGNC Symbol;Acc:HGNC:18274]
ADRA1B	adrenoceptor alpha 1B [Source:HGNC Symbol;Acc:HGNC:278]
ADRA1D	adrenoceptor alpha 1D [Source:HGNC Symbol;Acc:HGNC:280]
EDNRA	endothelin receptor type A [Source:HGNC Symbol;Acc:HGNC:3179]
EDNRB	endothelin receptor type B [Source:HGNC Symbol;Acc:HGNC:3180]
GRM5	glutamate metabotropic receptor 5 [Source:HGNC Symbol;Acc:HGNC:4597]
GRPR	gastrin releasing peptide receptor [Source:HGNC Symbol;Acc:HGNC:4609]
HRH1	histamine receptor H1 [Source:HGNC Symbol;Acc:HGNC:5182]
HTR2A	5-hydroxytryptamine receptor 2A [Source:HGNC Symbol;Acc:HGNC:5293]
HTR2B	5-hydroxytryptamine receptor 2B [Source:HGNC Symbol;Acc:HGNC:5294]
HTR2C	5-hydroxytryptamine receptor 2C [Source:HGNC Symbol;Acc:HGNC:5295]
LHCGR	luteinizing hormone/choriogonadotropin receptor [Source:HGNC Symbol;Acc:HGNC:6585]
NTSR1	neurotensin receptor 1 (high affinity) [Source:HGNC Symbol;Acc:HGNC:8039]
OXTR	oxytocin receptor [Source:HGNC Symbol;Acc:HGNC:8529]
AVPR1A	arginine vasopressin receptor 1A [Source:HGNC Symbol;Acc:HGNC:895]
AVPR1B	arginine vasopressin receptor 1B [Source:HGNC Symbol;Acc:HGNC:896]
LTB4R2	leukotriene B4 receptor 2 [Source:HGNC Symbol;Acc:HGNC:19260]
PTAFR	platelet activating factor receptor [Source:HGNC Symbol;Acc:HGNC:9582]
PTGER1	prostaglandin E receptor 1 [Source:HGNC Symbol;Acc:HGNC:9593]
PTGER3	prostaglandin E receptor 3 [Source:HGNC Symbol;Acc:HGNC:9595]
PTGFR	prostaglandin F receptor [Source:HGNC Symbol;Acc:HGNC:9600]
TACR1	tachykinin receptor 1 [Source:HGNC Symbol;Acc:HGNC:11526]
TACR2	tachykinin receptor 2 [Source:HGNC Symbol;Acc:HGNC:11527]
TACR3	tachykinin receptor 3 [Source:HGNC Symbol;Acc:HGNC:11528]
TBXA2R	thromboxane A2 receptor [Source:HGNC Symbol;Acc:HGNC:11608]
TRHR	thyrotropin releasing hormone receptor [Source:HGNC Symbol;Acc:HGNC:12299]
CCKAR	cholecystokinin A receptor [Source:HGNC Symbol;Acc:HGNC:1570]
CCKBR	cholecystokinin B receptor [Source:HGNC Symbol;Acc:HGNC:1571]
GNA11	G protein subunit alpha 11 [Source:HGNC Symbol;Acc:HGNC:4379]
GNA14	G protein subunit alpha 14 [Source:HGNC Symbol;Acc:HGNC:4382]
GNA15	G protein subunit alpha 15 [Source:HGNC Symbol;Acc:HGNC:4383]
MST1	macrophage stimulating 1 [Source:HGNC Symbol;Acc:HGNC:7380]
GDNF	glial cell derived neurotrophic factor [Source:HGNC Symbol;Acc:HGNC:4232]
NTRK3	neurotrophic receptor tyrosine kinase 3 [Source:HGNC Symbol;Acc:HGNC:8033]
MST1R	macrophage stimulating 1 receptor [Source:HGNC Symbol;Acc:HGNC:7381]
RET	ret proto-oncogene [Source:HGNC Symbol;Acc:HGNC:9967]
CD38	CD38 molecule [Source:HGNC Symbol;Acc:HGNC:1667]
TPCN1	two pore segment channel 1 [Source:HGNC Symbol;Acc:HGNC:18182]
TPCN2	two pore segment channel 2 [Source:HGNC Symbol;Acc:HGNC:20820]
MCOLN1	mucolipin 1 [Source:HGNC Symbol;Acc:HGNC:13356]
MCOLN2	mucolipin 2 [Source:HGNC Symbol;Acc:HGNC:13357]
MCOLN3	mucolipin 3 [Source:HGNC Symbol;Acc:HGNC:13358]
MCU	mitochondrial calcium uniporter [Source:HGNC Symbol;Acc:HGNC:23526]
VDAC1	voltage dependent anion channel 1 [Source:HGNC Symbol;Acc:HGNC:12669]
VDAC2	voltage dependent anion channel 2 [Source:HGNC Symbol;Acc:HGNC:12672]
VDAC3	voltage dependent anion channel 3 [Source:HGNC Symbol;Acc:HGNC:12674]
SLC25A4	solute carrier family 25 member 4 [Source:HGNC Symbol;Acc:HGNC:10990]
SLC25A5	solute carrier family 25 member 5 [Source:HGNC Symbol;Acc:HGNC:10991]
SLC25A6	solute carrier family 25 member 6 [Source:HGNC Symbol;Acc:HGNC:10992]
SLC25A31	solute carrier family 25 member 31 [Source:HGNC Symbol;Acc:HGNC:25319]
PPIF	peptidylprolyl isomerase F [Source:HGNC Symbol;Acc:HGNC:9259]
TNNC1	troponin C1, slow skeletal and cardiac type [Source:HGNC Symbol;Acc:HGNC:11943]
TNNC2	troponin C2, fast skeletal type [Source:HGNC Symbol;Acc:HGNC:11944]
PHKG1	phosphorylase kinase catalytic subunit gamma 1 [Source:HGNC Symbol;Acc:HGNC:8930]
PHKG2	phosphorylase kinase catalytic subunit gamma 2 [Source:HGNC Symbol;Acc:HGNC:8931]
PHKB	phosphorylase kinase regulatory subunit beta [Source:HGNC Symbol;Acc:HGNC:8927]
PHKA2	phosphorylase kinase regulatory subunit alpha 2 [Source:HGNC Symbol;Acc:HGNC:8926]
PHKA1	phosphorylase kinase regulatory subunit alpha 1 [Source:HGNC Symbol;Acc:HGNC:8925]
CAMK1D	calcium/calmodulin dependent protein kinase ID [Source:HGNC Symbol;Acc:HGNC:19341]
CAMK1G	calcium/calmodulin dependent protein kinase IG [Source:HGNC Symbol;Acc:HGNC:14585]
CAMK1	calcium/calmodulin dependent protein kinase I [Source:HGNC Symbol;Acc:HGNC:1459]
PDE1A	phosphodiesterase 1A [Source:HGNC Symbol;Acc:HGNC:8774]
PDE1B	phosphodiesterase 1B [Source:HGNC Symbol;Acc:HGNC:8775]
PDE1C	phosphodiesterase 1C [Source:HGNC Symbol;Acc:HGNC:8776]
PTK2B	protein tyrosine kinase 2 beta [Source:HGNC Symbol;Acc:HGNC:9612]
CD3D	CD3d molecule [Source:HGNC Symbol;Acc:HGNC:1673]
CD3E	CD3e molecule [Source:HGNC Symbol;Acc:HGNC:1674]
CD3G	CD3g molecule [Source:HGNC Symbol;Acc:HGNC:1675]
CD247	CD247 molecule [Source:HGNC Symbol;Acc:HGNC:1677]
CD4	CD4 molecule [Source:HGNC Symbol;Acc:HGNC:1678]
CD8A	CD8a molecule [Source:HGNC Symbol;Acc:HGNC:1706]
CD8B	CD8b molecule [Source:HGNC Symbol;Acc:HGNC:1707]
PTPRC	protein tyrosine phosphatase, receptor type C [Source:HGNC Symbol;Acc:HGNC:9666]
FYN	FYN proto-oncogene, Src family tyrosine kinase [Source:HGNC Symbol;Acc:HGNC:4037]
ITK	IL2 inducible T-cell kinase [Source:HGNC Symbol;Acc:HGNC:6171]
TEC	tec protein tyrosine kinase [Source:HGNC Symbol;Acc:HGNC:11719]
NCK1	NCK adaptor protein 1 [Source:HGNC Symbol;Acc:HGNC:7664]
NCK2	NCK adaptor protein 2 [Source:HGNC Symbol;Acc:HGNC:7665]
GRAP2	GRB2-related adaptor protein 2 [Source:HGNC Symbol;Acc:HGNC:4563]
NFKBIB	NFKB inhibitor beta [Source:HGNC Symbol;Acc:HGNC:7798]
NFKBIE	NFKB inhibitor epsilon [Source:HGNC Symbol;Acc:HGNC:7799]
CD28	CD28 molecule [Source:HGNC Symbol;Acc:HGNC:1653]
ICOS	inducible T-cell costimulator [Source:HGNC Symbol;Acc:HGNC:5351]
PDCD1	programmed cell death 1 [Source:HGNC Symbol;Acc:HGNC:8760]
CTLA4	cytotoxic T-lymphocyte associated protein 4 [Source:HGNC Symbol;Acc:HGNC:2505]
ARHGAP5	Rho GTPase activating protein 5 [Source:HGNC Symbol;Acc:HGNC:675]
ILK	integrin linked kinase [Source:HGNC Symbol;Acc:HGNC:6040]
ZYX	zyxin [Source:HGNC Symbol;Acc:HGNC:13200]
PARVB	parvin beta [Source:HGNC Symbol;Acc:HGNC:14653]
PARVA	parvin alpha [Source:HGNC Symbol;Acc:HGNC:14652]
PARVG	parvin gamma [Source:HGNC Symbol;Acc:HGNC:14654]
CAV1	caveolin 1 [Source:HGNC Symbol;Acc:HGNC:1527]
CAV2	caveolin 2 [Source:HGNC Symbol;Acc:HGNC:1528]
CAV3	caveolin 3 [Source:HGNC Symbol;Acc:HGNC:1529]
NECTIN1	nectin cell adhesion molecule 1 [Source:HGNC Symbol;Acc:HGNC:9706]
NECTIN2	nectin cell adhesion molecule 2 [Source:HGNC Symbol;Acc:HGNC:9707]
NECTIN3	nectin cell adhesion molecule 3 [Source:HGNC Symbol;Acc:HGNC:17664]
NECTIN4	nectin cell adhesion molecule 4 [Source:HGNC Symbol;Acc:HGNC:19688]
WAS	Wiskott-Aldrich syndrome [Source:HGNC Symbol;Acc:HGNC:12731]
WASF3	WAS protein family member 3 [Source:HGNC Symbol;Acc:HGNC:12734]
LMO7	LIM domain 7 [Source:HGNC Symbol;Acc:HGNC:6646]
SSX2IP	SSX family member 2 interacting protein [Source:HGNC Symbol;Acc:HGNC:16509]
SORBS1	sorbin and SH3 domain containing 1 [Source:HGNC Symbol;Acc:HGNC:14565]
TJP1	tight junction protein 1 [Source:HGNC Symbol;Acc:HGNC:11827]
ACP1	acid phosphatase 1, soluble [Source:HGNC Symbol;Acc:HGNC:122]
PTPRM	protein tyrosine phosphatase, receptor type M [Source:HGNC Symbol;Acc:HGNC:9675]
PTPRB	protein tyrosine phosphatase, receptor type B [Source:HGNC Symbol;Acc:HGNC:9665]
PTPRF	protein tyrosine phosphatase, receptor type F [Source:HGNC Symbol;Acc:HGNC:9670]
PTPN1	protein tyrosine phosphatase, non-receptor type 1 [Source:HGNC Symbol;Acc:HGNC:9642]
PTPRJ	protein tyrosine phosphatase, receptor type J [Source:HGNC Symbol;Acc:HGNC:9673]
FER	FER tyrosine kinase [Source:HGNC Symbol;Acc:HGNC:3655]
YES1	YES proto-oncogene 1, Src family tyrosine kinase [Source:HGNC Symbol;Acc:HGNC:12841]
SNAI1	snail family transcriptional repressor 1 [Source:HGNC Symbol;Acc:HGNC:11128]
GJA1	gap junction protein alpha 1 [Source:HGNC Symbol;Acc:HGNC:4274]
GJD2	gap junction protein delta 2 [Source:HGNC Symbol;Acc:HGNC:19154]
TUBB6	tubulin beta 6 class V [Source:HGNC Symbol;Acc:HGNC:20776]
TUBB	tubulin beta class I [Source:HGNC Symbol;Acc:HGNC:20778]
[truncated: 1,861 more rows]
