# Supplementary material for: Integrating Multi-Omics Analysis for Enhanced Diagnosis and Treatment of Glioblastoma: A Comprehensive Data-Driven Approach
Source: Preprints.org preprint supplement (doi:10.20944/preprints202303.0355.v1), 2023-03-20
Supplement: Supplementary file 26 [file Supplementary Table 8.xlsx]

## Sheet: Sheet1
	Betweenness		Degree		Closeness
TMSB4X	11227.7	UBC	3143	BMP4	0.000186532
UBB	10776.5	BMP4	2851	TMSB4X	0.000186254
BMP4	9978.23	FMOD	2750	FMOD	0.000185598
ENO2	9636.14	YWHAE	2727	CDH3	0.000183959
RAC1	9524.12	UBB	2704	UBB	0.000181951
UBC	9245.13	DRD5	2696	DRD5	0.000180571
FMOD	9178.41	CDH3	2689	TCF7L1	0.000180571
RPE	9142.76	PIK3R1	2680	UBC	0.000179211
CDH3	9137.59	CTNNB1	2676	ITPKC	0.000178923
PLA2G2D	8747.72	MAPK3	2670	ADCY6	0.00017838
UVRAG	8643.17	EGFR	2651	CLIC1	0.000177778
DRD5	8475.48	MYC	2650	TUBA1A	0.000177651
CLIC1	8450.54	NFKB1	2629	PLA2G2D	0.000177557
DEFA5	8378.75	TCF7L1	2626	PPARG	0.000177242
UQCRH	8334.35	PPARG	2585	CLDN10	0.000176835
TUBA1A	8262.56	PRKCQ	2559	EDAR	0.000176647
TCF7L1	8222.53	TMSB4X	2523	PLD2	0.000176616
ADCY6	8113.16	PRL	2512	ATP12A	0.000176491
CLDN10	7883.46	CLIC1	2510	NFKB1	0.000176274
PLD2	7745.58	CDKN1A	2487	PIM1	0.000176274
ITPKC	7735.56	PIM1	2469	CD63	0.000175963
DEFA6	7709	VEGFC	2463	VEGFC	0.000175747
MAPK3	7696.31	TUBA1A	2459	CD34	0.000175439
EDAR	7605.19	BMP2	2455	SDC4	0.000175223
PPARG	7425.64	ADRB2	2450	FTL	0.000175162
ATP12A	7318.04	GAB2	2441	MAPK3	0.000175039
SH2B2	7294.26	HDAC1	2434	CYP27A1	0.000174917
RPS6KA1	7286.29	RYR3	2427	GNA15	0.000174856
PRL	7263.04	GRM4	2423	TRIP10	0.000174856
PRKCQ	7246.61	GNAI2	2417	SH2B2	0.000174795
NFKB1	7220.2	CEBPA	2413	CEBPA	0.00017449
IFNA16	7220.04	ABL1	2413	PYGL	0.000174459
DEFA4	7192.47	MAPK14	2406	GAB2	0.000174429
ATP5F1B	7187.92	ADCY6	2402	RPS6KA1	0.000174246
PIM1	7065.96	PTPRM	2383	PRL	0.000174216
MT-ND4	6987.4	FN1	2370	ITGA10	0.000174216
TLR4	6973.7	ACVR1	2369	CD81	0.000173521
FTL	6927.92	JUN	2365	GSTM5	0.000173461
HDAC1	6911.55	CTSO	2364	S100A11	0.00017337
GRM4	6882.84	PRKCE	2360	TSPAN7	0.00017331
TRIP10	6832.9	ATP12A	2356	ITGA5	0.00017319
CD63	6832.02	PLD2	2349	IFNA16	0.00017319
UQCRFS1	6830.54	GHR	2349	ANXA5	0.00017316
CD81	6801.44	PINK1	2341	GRM4	0.0001731
ITGA10	6782.72	VCAM1	2336	HCLS1	0.00017301
RYR3	6747.17	STAT5A	2334	ADRB2	0.00017298
GSTM5	6711.23	CD34	2333	MGLL	0.00017298
GSTP1	6693.64	AGT	2330	FBP1	0.000172951
PLCD1	6684.04	NCK2	2329	AGT	0.000172831
CTSO	6680.73	EGLN3	2329	HAMP	0.000172831
YWHAE	6663.09	UQCRFS1	2324	RYR3	0.000172741
VEGFC	6610.38	PRKCZ	2324	NCK2	0.000172741
RAB5B	6607.24	PPP3CA	2324	CTSO	0.000172682
NCK2	6596.32	ANXA5	2316	TNFRSF8	0.000172682
PINK1	6592.03	CTNNA2	2314	OCA2	0.000172563
CYP27A1	6567.54	TLR4	2311	MYH9	0.000172563
BIRC7	6558.44	FTL	2310	PRKCQ	0.000172533
OCA2	6506.95	RPS6KA1	2309	SLC9A3R1	0.000172473
HAMP	6499.78	SKAP1	2304	CDKN1A	0.000172444
GAB2	6497.08	OCA2	2301	STAT5A	0.000172444
CACNG3	6483.04	CAV1	2301	SLC2A9	0.000172384
GNA15	6478.83	EDAR	2297	CTSK	0.000172325
PRKCZ	6478.16	GNA15	2296	HDAC1	0.000172295
HADHB	6474.3	PYGL	2294	PLCD1	0.000172176
GAPDH	6469	ACVR2A	2284	RAB5B	0.000172147
TSPAN7	6436.3	GSTP1	2283	GNAI2	0.000172087
SLC9A3R1	6420.71	BIRC3	2283	ITGA3	0.000172058
SDC4	6419.47	DLG2	2278	WNT11	0.00017191
CHMP2A	6416.64	AMOTL2	2277	VCAM1	0.000171851
CD34	6369.43	ITPKC	2276	UVRAG	0.000171762
FBP1	6327.21	UVRAG	2275	IFNGR2	0.000171762
SNCA	6319.69	ITGA5	2271	PRKCD	0.000171733
SLC2A9	6314.3	MYH9	2271	IL2RG	0.000171674
EGFR	6285.45	GNAI1	2271	AMOTL2	0.000171527
CTNNA2	6279.25	C8A	2267	JUP	0.000171468
GHR	6251.04	MAPK1	2266	ACVR1	0.000171204
GBE1	6247.47	ITGA10	2263	ASS1	0.000171204
UBA52	6245.99	SNCA	2263	SMO	0.000171204
CEBPA	6224.44	ITGA3	2261	S1PR1	0.000171174
ACVR1	6209.82	IQGAP2	2261	PINK1	0.000171145
PLCB3	6206.71	ID2	2258	S1PR4	0.000171145
SMO	6200.11	PSMD2	2256	GHR	0.000171086
WNT11	6176.16	PRKCD	2252	LAMB3	0.000171057
ADIPOR1	6175.91	CTSK	2249	NUPR1	0.000170969
HCLS1	6169.71	STAT3	2248	PRKCZ	0.000170882
CTSK	6163.13	GAPDH	2246	MST1R	0.000170853
EGLN3	6161.81	F3	2243	TNFRSF1A	0.000170823
MST1R	6158.98	PLA2G2D	2240	TCN2	0.000170736
ITGA3	6157.93	ATP5F1B	2237	TLR4	0.000170678
ASS1	6127.62	MAP2K1	2237	DAAM2	0.000170678
IL2RG	6124.48	KIT	2235	FBP2	0.000170648
ADRB2	6122.9	PBX1	2234	GSTP1	0.00017059
ANXA5	6120.17	CLDN10	2231	EGLN3	0.000170561
PYGL	6114.94	AKT1	2231	NPPA	0.000170532
MMP7	6113.96	HCLS1	2230	ALDH2	0.000170474
PRKCD	6100.45	TRIP10	2225	SKAP1	0.000170416
JUP	6093.23	PTPN6	2222	CER1	0.000170358
SKAP1	6078.94	CXCL12	2222	ATP6V1B2	0.000170271
S1PR4	6076.92	CD63	2221	BMP2	0.000170242
NUPR1	6070.86	IL2RG	2221	ADIPOR1	0.000170213
S100A11	6069.33	IRS2	2221	ARPC1B	0.000170184
NTRK1	6052.34	HADHB	2220	F3	0.000170126
COX6A2	6047.6	TNFRSF1A	2218	CACNG3	0.000170126
GNAI2	6039.1	FBXW7	2218	IL4R	0.000170126
AGT	6017.48	SDC4	2217	CDH17	0.000170097
MYC	6011.48	DAPK1	2217	ABL1	0.000170068
TEAD1	6000.58	CXCR4	2216	COX7A1	0.000170068
PLA2G2A	5998.91	TGFBR2	2200	PTPN6	0.000170039
ITGA5	5998.18	TSPAN7	2197	HLA-A	0.000170039
NR3C2	5993.81	IL10RB	2196	PTPRM	0.00017001
AMOTL2	5972.07	CYP27A1	2194	SDCBP	0.00017001
ISL1	5971.47	MAPK7	2194	FOSL1	0.00017001
IL10RB	5955.44	ACTN4	2193	MAP2K1	0.000169924
PFN2	5951.81	LYN	2186	C1R	0.000169837
OGDHL	5927.43	CSF3R	2185	ENO2	0.000169808
CDH17	5926.56	PDGFRB	2181	CTNNA2	0.000169779
VCAM1	5912.3	CBL	2181	MYC	0.00016975
MGLL	5901.72	MAGI2	2179	PLPP3	0.00016975
TNFRSF8	5898.19	GRB2	2178	PLCB3	0.000169722
CDKN1A	5894.16	CACNG3	2174	RHOG	0.000169693
HAGH	5893.43	KDR	2174	COX6A2	0.000169693
ABL1	5867.17	TACR3	2167	IL10RB	0.000169607
FBP2	5862.84	PBX3	2164	RPRM	0.000169607
MYH9	5854.59	NTRK2	2164	SERPING1	0.000169607
MAPK14	5852.38	AVPR1B	2163	GP1BA	0.000169578
PTPN6	5833.23	GLI3	2163	NR3C2	0.00016952
DAPK1	5832.08	PRKAR2B	2161	AVPR1B	0.000169492
MAP2K1	5831	PSMD7	2160	NDRG1	0.000169405
PBX3	5819.96	S1PR1	2159	TGFBI	0.000169405
CER1	5817.59	NTRK1	2158	GAPDH	0.000169377
HLA-A	5811.95	ISL1	2158	IFNA4	0.000169348
IFNA4	5803.49	CNTNAP2	2158	RGL1	0.000169319
STAT5A	5802.74	FYN	2158	PRKAR2B	0.000169291
CLDN7	5788.19	PIK3R5	2155	INHBB	0.000169262
PDPK1	5773.36	ASS1	2154	RAB13	0.000169176
C8A	5770.85	IFNGR2	2154	FLNC	0.000169176
MKNK2	5760.49	CD81	2151	GGT5	0.000169176
SPTA1	5721.22	FBP1	2149	INPP1	0.000169119
PTPRM	5711.42	COL4A1	2149	CNTFR	0.000169119
COX7A1	5707.62	NR3C2	2148	ISL1	0.00016909
CNTFR	5703.91	HCK	2148	MYD88	0.000169062
PSMD2	5696.42	PLPP3	2146	HSPB2	0.000169062
TNFRSF14	5692.01	SLC2A9	2143	PDGFRB	0.000169033
LAPTM4A	5681.39	MGLL	2143	PIK3R5	0.000169033
ILK	5664.86	BMPR1B	2143	SPTA1	0.000169005
AP1B1	5661.73	RAB5B	2141	HADHB	0.000168976
PIK3R1	5653.69	ILK	2139	RELN	0.000168976
LAMB3	5643.62	PLCB1	2137	CXCR1	0.000168976
NPPA	5639.75	LAMB3	2136	C3	0.000168976
HPSE2	5635.77	GOT2	2134	OGDHL	0.000168919
BMP15	5634.68	MYD88	2134	PBX3	0.00016889
GOT2	5624.56	PLCB3	2132	BMP15	0.00016889
IFNGR2	5621.03	PDPK1	2132	HCK	0.000168862
S1PR1	5607.47	RELN	2131	CSF3R	0.000168833
ATP6V1B2	5599.43	JUP	2127	SERPINA5	0.000168833
UNC13B	5556.92	ITGA2	2127	SERPINF1	0.000168776
CLDN8	5540.46	CDH1	2121	C8A	0.000168719
PGAM1	5531.72	YWHAH	2116	LTA	0.000168719
SLC2A2	5528.77	ATP6V1B2	2113	CSF1R	0.000168691
EHHADH	5527.18	LIPC	2111	AP1B1	0.000168691
SDCBP	5520.65	HLA-DRA	2111	EPHA2	0.000168691
CD3E	5515.52	PLCB4	2111	SLC22A4	0.000168691
PFKM	5513.95	NGFR	2110	CAV1	0.000168663
FOSL1	5511.37	VLDLR	2108	UNC13B	0.000168634
IQGAP2	5482.75	INHBB	2105	NTRK1	0.000168606
PBX1	5481.8	ADORA2B	2104	ILK	0.000168606
PRKAR2B	5470.83	STXBP1	2103	LILRA4	0.000168606
RHOG	5454.85	FLNA	2103	GCH1	0.000168577
HYAL2	5448.19	SH2B2	2101	CD1A	0.00016852
TACR3	5442.69	GSTM5	2101	CA9	0.000168464
CTNNBIP1	5436.89	MAP3K5	2097	ALDH1A1	0.000168464
AVPR1B	5435.64	GJA1	2094	ABCG2	0.000168435
GSK3A	5431.61	IL4R	2094	SNCA	0.000168407
CEND1	5429.59	GBE1	2093	DTX4	0.000168407
SLC22A4	5427.31	CXCR1	2093	AMHR2	0.00016835
HSPB2	5425.26	WNT11	2091	CTSE	0.00016835
RGL2	5419.34	GCH1	2091	VLDLR	0.000168322
ALDH2	5414.96	GNG3	2090	CEND1	0.000168322
GJA1	5414.35	TCF7L2	2090	STAT4	0.000168237
BMP2	5413.81	CDH17	2089	FRAT1	0.000168237
GCH1	5412.77	EHHADH	2088	IMPA2	0.000168237
IMPA2	5410.89	C3	2088	CRYM	0.000168237
BIRC3	5410.53	PRKN	2087	ID2	0.00016818
CDC37	5410.28	CSF1R	2087	ATP5F1B	0.00016818
PRKCE	5402.06	SLC7A11	2087	NR0B2	0.00016818
SGCG	5401.82	ALDH2	2086	EGFR	0.000168152
DLG2	5399.87	RPRM	2086	GBE1	0.000168152
RPRM	5394.78	IFNA16	2085	ACTN4	0.000168124
CXCR1	5394	LBR	2085	LDHA	0.000168124
LTA	5393.93	MEIS1	2085	ARHGEF6	0.000168124
PPP3CA	5392.87	SYK	2085	TNFRSF14	0.000168124
EIF4EBP1	5389.88	NDRG1	2084	SULT2B1	0.000168095
ACTN4	5389.58	SGMS1	2084	PFN2	0.000168039
HEXB	5388.12	FLNB	2084	PLIN1	0.000168039
ID2	5381.59	MST1R	2082	TALDO1	0.000168011
ATG2A	5375.71	ALOX5AP	2082	YWHAE	0.000167983
TUBA4A	5368.57	ENO2	2081	SELP	0.000167983
CALM1	5367.41	TGFBI	2081	ADORA2B	0.000167954
CDC25B	5366.15	AP1B1	2079	CEBPB	0.000167954
ARPC1B	5364.45	UNC13B	2077	TNFRSF1B	0.000167954
FABP5	5363.43	BCL6	2077	ACADS	0.000167954
PHGDH	5357.67	ZEB2	2077	PIK3R1	0.000167926
TCN2	5355.82	SPTA1	2076	KIT	0.000167926
ACADS	5355.14	SDCBP	2075	MADCAM1	0.000167898
ARHGEF6	5354.62	LAMC1	2075	LAPTM4A	0.000167842
MGST2	5348.17	SLC9A3R1	2074	HAND1	0.000167785
ESR1	5346.07	ABCG2	2073	NGFR	0.000167757
IFNA10	5340.09	NGF	2073	CSF2RB	0.000167757
NDUFV2	5339.2	TACR2	2071	PRKCE	0.000167701
ABCG2	5337.61	TP53	2071	C4BPB	0.000167701
DAAM2	5336.05	HIF1A	2070	CA2	0.000167701
EPHX2	5329.43	SERPING1	2069	ELMO1	0.000167673
RNF43	5320.95	CD3E	2068	TUBB6	0.000167645
VAMP8	5316.51	EPHA2	2068	BIRC3	0.000167616
FRAT1	5314.55	GSK3A	2067	PLA2G2A	0.000167588
CA9	5309.6	ARRB2	2066	CYFIP1	0.000167588
NGF	5305.25	ATP6V1E1	2065	NCOA4	0.000167588
PARD6A	5304.83	S1PR4	2063	IQGAP2	0.00016756
EPHA2	5304.48	TNFRSF8	2061	STXBP1	0.00016756
LBR	5302.82	RDX	2061	MGST2	0.00016756
TALDO1	5295.25	PPP1CC	2060	TUBA4A	0.000167532
LAMA5	5291.19	IRF8	2059	IFNA10	0.000167532
CTNNB1	5289.8	VIM	2059	VASP	0.000167504
STXBP1	5278.08	TCN2	2057	NPC2	0.000167476
HYAL1	5275.37	IL12A	2057	UQCRFS1	0.000167448
CACNG1	5271.69	RAP1B	2057	ACVR2A	0.000167448
PPP2R1A	5269.12	CACNA2D3	2057	GNG3	0.000167448
NPC2	5263.84	TIAM1	2056	CD3E	0.000167448
CDK4	5242.42	RHOG	2054	NFE2	0.000167364
TEC	5230.97	RAPGEF1	2052	GP9	0.000167336
NCOA4	5224.11	FSHR	2051	ATP6V0D1	0.00016728
CSF3R	5222	PRKG1	2049	BIRC7	0.000167224
ICOS	5221.7	TEAD1	2048	ARRB2	0.000167196
DTX4	5221.23	CALM1	2048	CRYAB	0.000167168
LDHA	5218.3	CER1	2047	IFNA14	0.000167168
SERPINA5	5216.99	MAML3	2047	IL22RA1	0.000167168
TNFRSF1A	5216.14	HAMP	2046	CD70	0.000167168
F3	5209.87	PROC	2045	HIF1A	0.00016714
ALDH1A1	5209.53	SOX9	2044	CNTNAP1	0.00016714
RAB13	5209.15	BTK	2042	CDC25B	0.000167112
NR0B2	5201.29	ITGA6	2042	GNAI1	0.000167084
ACVR2A	5198.12	C4BPB	2040	HAGH	0.000167084
GNG3	5194.66	KAT2B	2040	PSMD2	0.000167029
VLDLR	5185.41	SGCG	2039	LAMB2	0.000167029
PLA2G3	5179.56	VEGFA	2039	NGF	0.000167001
SULT2B1	5178.93	BMP15	2036	HEXB	0.000167001
LILRA4	5176.41	COX7A1	2035	IRS2	0.000166973
LIPC	5174.69	GSK3B	2033	LBR	0.000166945
INPP1	5171.43	BAAT	2032	SPI1	0.000166917
RELN	5162.22	CEBPB	2032	HPSE2	0.000166917
KIT	5161.13	EDNRB	2032	P2RY2	0.000166917
INHBB	5151.79	SMO	2031	MMP7	0.000166917
C4BPB	5147.02	GRIN2A	2030	VAMP8	0.000166917
FLNC	5142.13	ICOS	2028	LIPC	0.000166861
BAAT	5142.07	HSPB1	2027	SGCG	0.000166861
IL4R	5137.74	CAMK4	2027	HSD11B1	0.000166861
ATP6V1E1	5137.07	ATXN1	2027	DAPK1	0.000166834
CA2	5135.79	RGL1	2026	ALOX5AP	0.000166834
KAT2B	5132.78	APLNR	2024	RIN1	0.000166834
CLDN17	5131.21	PLCD1	2022	GNG5	0.000166806
DGKD	5119.4	RAB13	2022	HYAL2	0.000166806
LAMB2	5117.08	S100A11	2021	PPP3CA	0.000166778
RGL1	5116.59	FLNC	2020	GJA1	0.000166778
FGD1	5115.17	CDH5	2020	PFKM	0.000166778
SERPINF1	5100.99	PPP2R1A	2019	CHMP2A	0.000166722
GP9	5099.86	CTNNBIP1	2018	SLC7A5	0.000166722
GP1BA	5099.59	ARPC1B	2018	DLG2	0.000166694
NDRG1	5097.32	GNA12	2017	KAT2B	0.000166667
PIK3R5	5094.39	OGDHL	2016	SMAD7	0.000166639
ATP6V0D1	5092.33	PGD	2016	PHGDH	0.000166611
STAT4	5091.72	ESR1	2013	SGMS1	0.000166583
MYD88	5091.53	ITPKB	2013	FSHR	0.000166583
SGMS1	5088.16	SLC2A2	2012	TNFRSF21	0.000166583
PPP1CC	5080.71	MGST2	2012	ACOX2	0.000166583
GNG5	5077.1	STAT4	2012	CTNNBIP1	0.000166556
GGT5	5075.69	VAV1	2011	HSPB1	0.000166528
PCK2	5066.02	STAM	2010	APLNR	0.000166528
MT-CO2	5065.45	TNFRSF1B	2010	LAMA5	0.000166528
GNB2	5063.04	CSNK1E	2009	GOT2	0.000166472
SLC7A5	5062.98	FOSL1	2008	FLNA	0.000166472
CRYM	5061.39	PAK1	2008	GPX3	0.000166472
SLC3A2	5054.86	CAMK1D	2007	CTSH	0.000166445
CD1A	5053.71	TNFRSF21	2005	P2RX4	0.000166445
SERPING1	5052.76	MAPKAPK3	2004	FGD1	0.000166445
IFNA14	5048.5	SPI1	2004	TACR2	0.000166417
CD70	5045.22	FRAT1	2003	HLA-DRA	0.000166362
PRKN	5043.26	MAP3K3	2003	BAAT	0.000166362
AGL	5041.51	YWHAZ	2001	STAR	0.000166334
GOT1	5039.54	PFN2	2000	LIPG	0.000166334
ATP5PF	5037.75	LAMA5	2000	CYP4F2	0.000166306
ADORA2B	5032.16	INPP1	2000	CSF3	0.000166306
LDHB	5029.67	PHGDH	1999	TP53BP2	0.000166279
PDGFRB	5028.23	CNTFR	1998	PDE1B	0.000166279
HAND1	5026.44	CDK4	1998	C4BPA	0.000166251
PDHA2	5016.98	CSF2RB	1997	TIMP1	0.000166251
ARRB2	5015.08	SERPINA5	1996	PBX1	0.000166223
MAPK7	5013.5	PSMD14	1996	GLI3	0.000166223
HCK	5012.95	GNAQ	1995	GRPR	0.000166223
GNAI1	5008.91	COL1A2	1995	ATG2A	0.000166223
TP53BP2	5007.91	CTSH	1993	ATP6V1E1	0.000166196
DLST	5006.15	DAAM2	1992	GNB2	0.000166196
HSPB1	5001.12	PFKM	1991	CTSL	0.000166168
TUBB6	4998.75	HLA-A	1988	G6PC2	0.000166168
PARP1	4990.03	YAP1	1987	PROC	0.000166141
MAML3	4985.7	CDH2	1987	FGR	0.000166141
C3	4984.5	CHMP2A	1986	PDE2A	0.000166141
MTTP	4982.29	HPSE2	1984	LYN	0.000166113
ATG9A	4979.06	SLC22A4	1984	TACR3	0.000166113
ORAI3	4978.11	SMAD7	1984	PGAM1	0.000166113
DDB1	4977.79	ANXA1	1984	IRF8	0.000166058
CCL22	4976.48	LAPTM5	1983	KDR	0.00016603
PLPP3	4973.25	CA9	1982	CALM1	0.00016603
TGFBI	4966.03	CREB5	1982	CCL22	0.00016603
PSMD7	4963.1	PRKCA	1982	ITPKA	0.000166003
TACR2	4962.97	SYT1	1980	CDH5	0.000165975
GRPR	4961.51	GNB3	1979	GNB3	0.000165948
RIN1	4947.75	SPARC	1979	HSD17B2	0.000165948
CLDN5	4943.84	MBL2	1978	MAPK7	0.00016592
IL22RA1	4939.23	AFF1	1978	SLC2A2	0.00016592
CSF1R	4925.23	ITGB1	1978	CXCR4	0.000165893
MAPKAPK3	4922.94	HSD17B2	1975	PDPK1	0.000165865
DUSP4	4922.88	RRAS2	1975	HYAL1	0.000165865
TIAM1	4922.55	ABCC2	1973	GSK3A	0.00016581
CTSE	4920.79	PLA2G2A	1972	RNF43	0.000165782
CHMP7	4919.37	CRYAB	1971	RELB	0.000165782
MADCAM1	4916.58	COX6A2	1970	PCBP1	0.000165755
CCL21	4915.96	CDK7	1970	SNAI2	0.000165755
MT-ND6	4915.01	PDHA2	1969	CTNNB1	0.000165728
UCP1	4914.1	ABCB1	1968	PPP2R1A	0.0001657
BPGM	4903.96	IMPA2	1967	LAPTM5	0.0001657
CNTNAP2	4901.43	TEC	1967	PLPP2	0.0001657
ACOX2	4900.77	CRYM	1964	ICOS	0.000165673
UQCRC1	4900.03	LDHA	1963	VAV1	0.000165673
AMHR2	4897.49	ARHGEF6	1962	ACSL1	0.000165673
MAGI2	4895.48	ELMO1	1962	SLN	0.000165673
CNTNAP1	4891.47	ATP1A1	1961	ORAI3	0.000165673
ITPKA	4891.15	F9	1961	DRAM1	0.000165645
GPI	4889.19	LTA	1960	UBA52	0.000165618
C1R	4884.65	TP53BP2	1960	PLA2G4A	0.000165618
CAV1	4882.1	GRPR	1959	P2RX1	0.000165618
CSF2RB	4879.32	MITF	1959	HK3	0.000165618
PLIN1	4879.3	UBA52	1958	FLNB	0.00016559
PLPP2	4871.45	GP1BA	1958	RGN	0.00016559
STAM	4869.81	SLC2A1	1958	SGK1	0.000165563
CDIPT	4869.2	PF4	1958	GOT1	0.000165536
SPI1	4867.45	CNTN1	1958	TGFBR2	0.000165508
FN1	4853.78	PARP1	1957	SOX9	0.000165508
VAV1	4847.52	MAPK6	1957	C1S	0.000165481
ARPC1A	4846.69	MAP4K4	1957	ITGA6	0.000165453
CYFIP1	4844.19	MTTP	1956	CLDN8	0.000165453
G6PC2	4838.68	YWHAG	1956	MTTP	0.000165426
ATG14	4838.48	TNFRSF14	1955	ICAM3	0.000165426
IL12A	4834.67	TALDO1	1955	SLC1A5	0.000165426
FBXW7	4828.21	CCR9	1955	ARPC1A	0.000165399
STAR	4827.59	NUPR1	1954	MAP3K5	0.000165371
PCBP1	4824.86	TUBA4A	1954	CASQ2	0.000165371
MGAM	4818.88	GPC3	1953	GRN	0.000165371
IRS2	4818.58	FGF9	1953	HK1	0.000165371
TUBB4A	4813.74	NR0B2	1951	YWHAH	0.000165344
P2RY2	4813.14	CA2	1951	EHHADH	0.000165344
CAMK4	4810.78	ARPC1A	1950	AQP9	0.000165344
IL24	4809.43	C1R	1949	ATG9A	0.000165344
PGM1	4809.05	CYFIP1	1948	GIT1	0.000165344
CA14	4807.18	BLNK	1947	PYCARD	0.000165344
NFE2	4804.4	VASP	1945	SLC7A11	0.000165317
CXCR4	4802.15	LHCGR	1945	DGKD	0.000165317
CXCL6	4801.59	HAGH	1944	IFNA5	0.000165317
RGN	4798.78	PCK1	1944	GABARAP	0.000165317
PROC	4795.19	PPP2CA	1944	TEC	0.000165289
SLC2A1	4794.19	SRC	1944	TNNC1	0.000165289
GIT1	4793.94	ALDH1A1	1942	CLDN5	0.000165289
PCK1	4789.97	FGR	1942	ADGRB1	0.000165289
PKMYT1	4783.87	LILRA4	1941	COL4A1	0.000165262
HIF1A	4773.82	HSPB2	1940	PGM1	0.000165262
LHPP	4767.45	C4BPA	1939	CCL21	0.000165262
VASP	4767.38	C5	1939	DUSP4	0.000165262
PF4	4765.06	CASP3	1939	WNT2	0.000165262
TFAP4	4764.3	STAR	1938	RAP1B	0.000165235
IRF8	4757.05	CCN2	1938	IL24	0.000165235
AKT1	4755.78	NPPA	1937	LGMN	0.000165235
CCL19	4753.78	JAG1	1937	SLC10A1	0.000165235
NGFR	4752.7	ACADS	1936	FN1	0.000165207
CDC20	4752.29	GNB2	1936	MRAS	0.000165207
PIP4K2C	4744.54	NFE2	1936	CASQ1	0.00016518
POMC	4744.53	IL10RA	1936	CLDN7	0.00016518
TNNC1	4741.56	HEXB	1933	PDHA2	0.000165153
SLC1A5	4737.71	P2RY2	1933	DHCR24	0.000165153
MEF2C	4736.66	CCR4	1933	CAMK4	0.000165125
GLI3	4735.96	CYP19A1	1933	STAM	0.000165125
GLA	4735.86	FBP2	1932	MAPKAPK3	0.000165125
CCR9	4735.57	SELL	1932	PF4	0.000165125
MT-CO1	4735.3	ADIPOR1	1931	GADD45A	0.000165125
TNFRSF1B	4722.12	CDC25B	1931	ANXA1	0.000165098
DDIT3	4716.9	NPC2	1931	LDHB	0.000165098
BMPR1B	4713.53	PLK1	1930	CNTNAP2	0.000165044
GNB3	4712.73	PIK3CA	1930	ABCC2	0.000165044
HSD17B2	4712.65	PLA2G4A	1929	PCK1	0.000165044
CYP4F2	4709.95	MAP2K4	1929	CTSA	0.000165044
TLX1	4706.74	ACTB	1929	ITGA2	0.000165017
HLA-DRA	4704.13	NCOA4	1928	BCL6	0.000165017
PLA2G4A	4700.38	PTK2B	1928	VIM	0.000165017
CYP7A1	4700.29	AGTR1	1928	CCR9	0.000165017
CSF3	4695.87	CDC20	1927	CTSD	0.000165017
SGK2	4695.08	GPX3	1926	F10	0.000165017
PIK3C2B	4694.1	MMP7	1925	NEU1	0.000165017
C4BPA	4693.13	GGT5	1925	LGALS1	0.000165017
BLNK	4688.76	C1S	1924	MEIS1	0.000164962
CCL20	4688.4	CD1A	1923	NBL1	0.000164962
BTK	4684.52	GSN	1923	BLNK	0.000164935
GDF5	4681.9	DNM3	1922	PIP4K2C	0.000164908
MEIS1	4677.07	APC	1922	IFNA7	0.00016488
CRYAB	4674.8	HAND1	1921	BMPR1B	0.000164853
PYCARD	4671.94	CXCR2	1921	ITGB7	0.000164853
NAT2	4669.06	FLI1	1921	AKT1	0.000164826
FSHR	4668.02	MMP2	1921	GABARAPL1	0.000164799
ADH7	4664.18	FOLH1	1920	CLDN17	0.000164799
CHI3L2	4657.7	BDKRB2	1920	EPHX1	0.000164799
ELMO1	4654.27	KCNN2	1919	IL10RA	0.000164772
GABARAP	4647.06	IFNA4	1918	GDF5	0.000164772
AP1M2	4644.81	ICAM2	1918	ADH7	0.000164772
IFNA7	4639.36	TGFBR1	1918	ID3	0.000164772
CHD8	4637.57	CASQ2	1917	PCK2	0.000164772
SMAD7	4635.14	SP1	1917	ATP1A1	0.000164745
ALDH3A1	4633.68	LDHB	1915	MNDA	0.000164745
PLCB4	4631.83	PCBP1	1915	MAPK14	0.000164718
YWHAH	4631.71	SELP	1915	IL12A	0.000164718
CXCL12	4628.13	CDH12	1915	CD80	0.000164718
CEBPB	4625.03	AMHR2	1914	F2	0.00016469
ALOX5AP	4622.51	ITGAV	1914	AOAH	0.00016469
EPHX1	4620.42	PDGFC	1914	LYL1	0.000164636
DHCR24	4619.61	PGM1	1913	CACNA2D3	0.000164609
BIRC2	4616.24	CTNNA3	1913	BTK	0.000164609
LGMN	4612.35	GNG5	1912	TNFSF13	0.000164609
ATP1A1	4611.45	EGF	1912	GRM6	0.000164582
RELB	4609.09	CD53	1912	NAT2	0.000164582
AADAC	4606.89	SLC7A5	1911	SPHK1	0.000164582
DUSP9	4597.48	GOT1	1910	CXCL6	0.000164555
HK3	4594.02	F2	1910	AADAC	0.000164528
ADGRB1	4593.14	LAPTM4A	1909	DDIT3	0.000164528
PLK1	4584.34	LAMB2	1908	DUSP9	0.000164528
ITGB7	4583.22	ATP6V0D1	1907	GPI	0.000164528
CDK7	4582.96	CTSE	1907	CLCF1	0.000164528
LIPG	4580.21	CNTNAP1	1907	FBXW7	0.000164501
CASQ1	4572.56	RASGRP1	1907	THBS2	0.000164501
ITGA6	4570.81	SGK1	1907	SLC10A2	0.000164501
NDUFA9	4566.32	DGKD	1905	PARP1	0.000164474
CTSL	4566.32	BIRC2	1905	EGF	0.000164474
RASGRP1	4563.12	PROX1	1905	PLA2G3	0.000164474
IFNA5	4561.54	SNAI2	1904	MAML3	0.000164447
EGF	4560.77	CCL21	1903	PYGM	0.000164447
SLN	4560.29	NEDD4	1902	TSPO	0.000164447
ACSL1	4558.85	CXCL6	1899	IL32	0.000164447
NDUFS2	4555.18	JAK1	1899	CDH1	0.00016442
CYP4F3	4554.28	TUBB6	1895	GNA12	0.00016442
YWHAG	4549.1	PLIN1	1894	PGD	0.00016442
VSNL1	4542.86	CYFIP2	1894	COL4A4	0.00016442
PRKACG	4542.66	IL2RB	1894	CORO1A	0.00016442
RAP1B	4537.48	IL21	1893	RAPGEF1	0.000164393
PDE1B	4534.13	DKK2	1892	SPARC	0.000164393
F9	4532.66	ITPKA	1891	NTRK2	0.000164366
NTF3	4529.18	PDE2A	1891	ICAM2	0.000164366
SELP	4527.57	GNA14	1891	NPY	0.000164366
HHEX	4521.25	DLST	1890	EBI3	0.000164366
PGAM2	4517.66	CYP4F2	1890	RASGRP1	0.000164339
RAG2	4517.15	TUBA1C	1890	HSD11B2	0.000164339
NEU1	4516.34	DDB1	1889	CA14	0.000164339
TIMP1	4515.63	ACSL1	1889	ABCB1	0.000164312
P2RX4	4514.07	HSD11B1	1889	EPHX2	0.000164312
ONECUT1	4513.52	AOAH	1889	PPP1CC	0.000164285
MBL2	4511.98	SERPINF1	1888	CDK4	0.000164258
MGRN1	4511.32	ETV6	1886	BDKRB2	0.000164258
LHCGR	4510	CTSD	1884	ALDH3A1	0.000164258
CACNA2D3	4508.18	GP9	1882	BATF	0.000164258
BCL6	4504.62	ACTC1	1882	DDB1	0.000164231
MAP3K5	4499.55	TBC1D1	1882	NTF3	0.000164231
TGFBR2	4496.7	ERBB4	1882	SIPA1	0.000164231
CASQ2	4496.61	MNDA	1881	RGL2	0.000164231
CSNK1E	4496.04	CACNA1C	1881	CEBPE	0.000164204
PDE2A	4495.38	AADAC	1878	MAGI2	0.000164177
TNFRSF21	4491.35	CXCL13	1878	CCL20	0.000164177
SLC7A11	4489.06	CXCL8	1878	CD1B	0.000164177
ACADM	4486.87	PSMB3	1878	ZBTB16	0.00016415
CTSH	4486.57	PIK3CB	1878	TRPV4	0.000164123
PIK3C3	4478.49	AQP9	1877	CXCL12	0.000164096
ABCC2	4472.06	RALB	1877	TCF7L2	0.000164096
TCF7L2	4471.15	FCER1G	1877	TIAM1	0.000164096
TUBA1C	4462.56	HYAL1	1876	ITPKB	0.000164096
GRAP2	4460.26	CCND1	1876	LHCGR	0.000164069
JUN	4459.81	ACVRL1	1875	CTF1	0.000164069
SLC27A3	4455.38	ITPR1	1875	CRLF2	0.000164069
ADIPOR2	4452.17	IFNA14	1874	PLAT	0.000164042
FRAT2	4451.89	CCL19	1873	PRKACG	0.000164042
CDH1	4449.64	GNB1	1873	JUN	0.000164015
ICAM3	4447.82	SYN3	1872	HHEX	0.000164015
SLC10A1	4447.35	ZBTB16	1872	SLC3A2	0.000164015
ITK	4446.55	YWHAB	1872	CFHR2	0.000164015
HK1	4446.28	CXCL9	1871	TYROBP	0.000164015
PC	4439.65	SDC1	1871	ACSL5	0.000164015
SLC19A2	4434.67	FBN1	1871	SELL	0.000163988
SOX9	4434.44	IL22RA1	1870	GDF7	0.000163988
HSD11B2	4433.5	TLR2	1870	IL33	0.000163988
FLNB	4432.07	ARPC5	1870	PKMYT1	0.000163988
KDR	4425.91	CYP7A1	1869	CETP	0.000163988
WASF1	4413.76	PTPN13	1869	SLC27A3	0.000163961
SNAI2	4412.97	NTF3	1868	CHI3L2	0.000163961
CTSA	4407.59	CCR3	1868	IL36A	0.000163961
CCL25	4406.98	CD70	1867	MMP2	0.000163934
CTSD	4402.59	PLAT	1866	C6	0.000163934
AQP9	4402.49	RNF43	1865	CACNG1	0.000163934
NTRK2	4401.82	C6	1865	ADIPOR2	0.000163934
SLC10A2	4401.13	F10	1864	IL3RA	0.000163934
CD27	4400.55	TNF	1864	NEDD4	0.000163908
CORO1A	4397.74	GRK5	1864	CYP4F3	0.000163908
CLDN9	4397.47	BDKRB1	1864	TLR5	0.000163908
GRM6	4395.88	CPB2	1863	FOLH1	0.000163881
ICAM2	4395.64	GYG1	1863	IL21	0.000163881
TSPO	4394.87	SMAD1	1863	PTGER2	0.000163881
LYN	4394.1	SOS1	1863	PARD6A	0.000163881
C5	4391.94	CD226	1862	FCER1G	0.000163854
ECHS1	4391.74	DUSP4	1861	ATP6V0C	0.000163854
CYP2J2	4389.87	PRKACG	1861	POMC	0.000163827
F10	4389.86	P2RX4	1861	PIK3C2B	0.000163827
RAPGEF1	4383.2	VAMP8	1860	EFNA1	0.000163827
ATP6V0C	4380.86	IFNG	1859	CYP2J2	0.0001638
CTF1	4374.04	DUSP3	1859	CAPNS1	0.0001638
CXCL9	4372.15	CSF3	1858	LEP	0.0001638
VEGFA	4370.98	AXIN1	1858	PC	0.0001638
GPX4	4370.37	LMO3	1858	FRAT2	0.0001638
CLCF1	4367.59	RAB7A	1857	CBL	0.000163773
GRN	4367.09	IRS1	1856	EDNRB	0.000163773
ELOVL4	4366.18	ATG9A	1855	GPX2	0.000163747
PTGES2	4366.04	PDE1B	1855	SHC2	0.000163747
SGK1	4365.08	TRHR	1855	TCIRG1	0.000163747
MNDA	4363.9	PIP4K2A	1853	PRKN	0.00016372
CEBPE	4362.17	CHRM2	1853	MBL2	0.000163693
CAPNS1	4361.15	MADCAM1	1852	SERPINB2	0.000163693
AIFM1	4358.5	IL24	1852	CXCL16	0.000163693
FLNA	4357.73	MAF	1852	CHAD	0.000163693
MT-ND2	4354.69	CD80	1851	PLCB4	0.000163666
CBL	4351.62	NEU1	1850	CSNK1E	0.000163613
CCL17	4348.3	GRM6	1850	TEAD1	0.000163586
DERA	4342.41	LGALS1	1849	VEGFA	0.000163586
FOLH1	4342.09	ZFHX3	1849	FABP5	0.000163586
PGD	4341.15	HYAL2	1848	HLA-DRB1	0.000163559
IFNA17	4340.31	POMC	1848	TUBB4A	0.000163559
SELL	4335.6	SLN	1848	LAMC1	0.000163506
KAT2A	4335.37	CTNND2	1848	GPC3	0.000163506
CS	4334.43	IFNA10	1847	CCR4	0.000163506
ARHGEF1	4333.61	PIK3C2B	1847	RALB	0.000163506
CREB5	4332.29	THBS2	1847	TLR2	0.000163506
SIPA1	4327.9	CEND1	1846	ID1	0.000163506
YAP1	4324.97	LGMN	1846	CD82	0.000163506
HSD11B1	4324.68	CTSA	1846	CA7	0.000163506
MOS	4321.36	PSMC4	1846	SLC2A1	0.000163479
LYL1	4317.97	DAPK2	1846	IFNA17	0.000163479
GADD45A	4317.23	JARID2	1846	RRAS2	0.000163452
GATA1	4316.78	HTR2B	1846	F9	0.000163452
EEF2	4313.1	NOTCH1	1846	KCNN2	0.000163452
TRPV4	4311.8	LMO7	1846	TFAP4	0.000163452
TCIRG1	4310.86	GREM1	1845	LHPP	0.000163452
CACNA2D2	4310.73	NPY1R	1845	TSHB	0.000163452
CLDN14	4306.48	FGD1	1844	NCF2	0.000163452
ITGA2	4305.72	GRAP2	1844	PLTP	0.000163452
RRAS2	4304.81	CTSL	1843	GRIN2A	0.000163425
ACSL5	4301.3	IKBKE	1843	MAP3K3	0.000163425
RDX	4300.78	DRD1	1843	GLA	0.000163425
PTGES3	4300.46	IQGAP1	1843	NOS2	0.000163399
BATF	4299.55	GABRB2	1842	GRAP2	0.000163372
KCNN2	4299.3	OXTR	1842	AP1M2	0.000163372
MDH1	4295.21	DDIT3	1841	YWHAG	0.000163345
IRF3	4293.03	CCL20	1841	CPB2	0.000163345
SYT1	4292.2	NRXN3	1841	CD226	0.000163345
PYGM	4291.71	CASQ1	1840	CYP11A1	0.000163345
RAB3A	4291.3	PYGM	1840	ATP6V0B	0.000163345
CASP3	4286.33	PTGER2	1840	ATP6AP1	0.000163319
GYS1	4283.46	PSMB8	1840	ZEB2	0.000163292
MAP3K14	4280.8	IGF1R	1840	CREB5	0.000163292
CCL1	4277.26	ACTN1	1840	CXCR2	0.000163292
NOS2	4274.86	RHOA	1840	MAP3K14	0.000163292
P2RX1	4269.96	GRN	1839	PIM2	0.000163292
PAK1	4266.69	GDF7	1839	STAT3	0.000163265
PIM2	4263.07	LAMB1	1839	C5	0.000163265
GPX3	4261.47	CDK6	1839	MMP9	0.000163239
CDH5	4261.22	TFAP4	1837	SLC22A1	0.000163212
NEDD4	4260.73	SIPA1L1	1837	SDC1	0.000163185
CXCL13	4256.83	HK1	1836	TRIM16	0.000163185
AOAH	4256.42	NPY	1836	MGRN1	0.000163185
CXCL8	4255.17	LIPG	1835	CLDN9	0.000163185
AXIN1	4251.43	SLC10A2	1834	CCL19	0.000163159
PRDX1	4249.74	WASF2	1834	LIPA	0.000163159
CXCL1	4245.46	WNT2	1833	NPR1	0.000163159
ATG4D	4241.92	DTX4	1832	PDCD1	0.000163159
COX6C	4240.11	SULT2B1	1832	FEV	0.000163159
COX8A	4237.63	RGN	1832	CCN2	0.000163132
GSK3B	4237.27	ITGB7	1832	VSNL1	0.000163132
IL21	4234.7	IL33	1832	BASP1	0.000163132
SLC22A1	4229.32	HRAS	1832	PRDX1	0.000163132
ID3	4228.16	CXXC4	1832	SLC19A2	0.000163106
TUBB2A	4227.2	COL4A2	1831	MGAM	0.000163079
HRH2	4225.77	HRH2	1830	OLR1	0.000163079
FGR	4223.57	NRP2	1829	CYP7A1	0.000163052
SYN3	4220.83	TNNC1	1828	GNG4	0.000163052
MRAS	4220.8	GDF5	1828	MT-ND4	0.000163052
COL4A1	4220.69	VSNL1	1828	TNFRSF12A	0.000163052
ALDOC	4214.52	TSPO	1828	HRH2	0.000163026
PFN1	4213.11	ADH7	1827	FGG	0.000163026
GDF7	4212.33	CYP2J2	1827	LIF	0.000163026
GABARAPL1	4210.05	GABARAPL1	1827	CDIPT	0.000163026
CYP11B2	4209.22	RIN1	1826	GYS1	0.000162999
ZBTB16	4198.79	MAP3K14	1826	RDX	0.000162973
NPY	4198.71	ID3	1826	ACTC1	0.000162973
F2	4196.51	CLDN17	1825	RAG2	0.000162973
SFN	4194.05	CAPNS1	1825	CACNA2D2	0.000162973
ACADVL	4193.27	LEP	1825	MOS	0.000162973
SHC2	4192.38	TIMP1	1824	RAB3A	0.000162946
PRKG1	4188.17	LIPA	1823	ALDOC	0.000162946
GRIN2A	4187.42	NTNG1	1823	IL18	0.00016292
CLDN1	4186.98	IL7	1823	AKR1C3	0.00016292
SPARC	4186.82	FGFR2	1823	WASF1	0.000162893
ITPKB	4186.23	GADD45A	1822	TLX1	0.000162893
TSHB	4185.11	CYP11A1	1822	PLK2	0.000162866
MAP2K4	4184.24	ACO1	1822	ONECUT1	0.00016284
CD1B	4179.89	CADM1	1822	IL15RA	0.00016284
CFHR2	4178.63	FABP5	1821	SNAI1	0.00016284
LAPTM5	4178.6	CACNG1	1821	F7	0.00016284
GSTA3	4174.24	NAT2	1821	CS	0.00016284
MANBA	4172.4	MMP9	1821	IL3	0.000162813
ATP6V0E2	4168.91	CD55	1821	GDF10	0.000162813
PDCD1	4167.03	ARHGAP17	1819	GATA1	0.000162787
IL32	4166.17	AMOT	1818	FGF23	0.000162787
IL33	4164.72	BASP1	1818	PFN1	0.000162787
SLC2A4	4164.05	ALDH3A1	1817	TUBA1C	0.00016276
TYROBP	4162.61	WASF1	1817	LY96	0.00016276
ATP6V0B	4161.01	PARD3	1817	SERPINF2	0.00016276
PPP2CA	4155.31	DUSP9	1816	PFKFB3	0.00016276
CDH12	4153.98	HACD1	1816	TEAD3	0.00016276
CPB2	4153.24	GNG12	1816	SGK2	0.000162734
ADIPOQ	4148.8	PRNP	1816	CFD	0.000162734
GABARAPL2	4143.63	MEF2C	1815	DNM3	0.000162707
MAP3K3	4142.35	NCOA1	1815	OXTR	0.000162707
VIM	4141.26	GIT1	1813	CD14	0.000162707
DSPP	4137.95	MRAS	1813	CYP27B1	0.000162681
IKBKE	4137.89	FZD4	1813	CCL17	0.000162655
SLC27A2	4133.76	CCL22	1812	PSMD7	0.000162628
CCR6	4129.92	ACTR3	1812	AFF1	0.000162628
TNFRSF12A	4127.27	ANK3	1812	CDH12	0.000162628
CDR1	4121.54	LHPP	1811	ELOVL4	0.000162628
GLUD1	4121.37	PIM2	1811	ADM	0.000162628
GNA12	4117.1	CD1B	1810	IL2RB	0.000162575
GPC3	4116.32	DRAM1	1810	SFN	0.000162575
LGALS1	4111.14	NECTIN3	1810	MYL7	0.000162575
AP3S1	4108.83	PSMC6	1810	PROS1	0.000162575
AFF1	4107.44	BPGM	1809	PAK1	0.000162549
AGPAT2	4101.45	SGK2	1809	ARHGAP17	0.000162549
PFKFB3	4101.25	GATA1	1809	ITGAV	0.000162522
ABCB1	4099.74	AR	1809	CASP7	0.000162522
TEAD3	4093.06	HHEX	1808	CDH2	0.000162496
HRAS	4093.06	SUCLG2	1808	DLST	0.000162496
CCNG1	4092.58	EPHX2	1807	DAPK2	0.000162496
EBI3	4089.98	HSD11B2	1806	MAPK13	0.000162496
APLNR	4088.67	BIRC7	1805	SDC2	0.000162496
PSMC4	4084.77	IFNA5	1805	SH2D2A	0.000162496
TRIM16	4084.04	PIK3R2	1805	HMOX1	0.00016247
CTNNA3	4083.45	NLK	1805	TNF	0.000162443
ZFHX3	4079.92	ZFP36L1	1805	ADH1A	0.000162443
C1S	4079.34	EPHX1	1804	GSN	0.000162417
IL10RA	4079.11	RELB	1803	GADD45G	0.000162417
SPATA2L	4078.22	NDUFA9	1803	WNT10B	0.000162417
SV2A	4078.19	SFN	1803	ZYX	0.000162417
LEP	4077.12	MAPK13	1803	YAP1	0.00016239
SPHK1	4077.11	COL4A4	1803	NFKBIE	0.00016239
CYP27B1	4073.79	RAG2	1802	AGPAT2	0.00016239
CTSV	4072.9	STRADB	1802	PRKG1	0.000162364
RALB	4070.3	APOB	1802	CDR1	0.000162364
ACP2	4070.24	ICAM3	1801	BDKRB1	0.000162338
CD80	4068.9	CD27	1801	CXCL1	0.000162338
PERP	4068.35	CEBPE	1801	ADIPOQ	0.000162338
C6	4067.67	GLUD1	1801	CHD8	0.000162338
MYBL2	4066.69	CAMK2D	1801	CXCL13	0.000162311
CLTCL1	4065.58	MET	1801	CCND1	0.000162311
SERPINF2	4065.32	AGL	1800	FGF6	0.000162311
ATXN1	4062.79	GNG4	1800	CLTCL1	0.000162311
MAPK13	4061.59	CCND2	1800	PROCR	0.000162311
ITGAV	4058.23	CXCL1	1799	GYG1	0.000162259
AR	4057.99	PPP1CA	1799	ACADVL	0.000162259
NBL1	4057.02	WNT7A	1799	AP3S1	0.000162232
EFNA1	4054.68	PC	1798	SYN3	0.000162206
YY1AP1	4052.13	FUT8	1798	PROM1	0.000162206
WNT2	4046.39	PGAM1	1797	ADH1C	0.000162206
FGG	4045.94	CD38	1797	ATXN1	0.00016218
TLR5	4045.5	ELOVL6	1797	NPY1R	0.00016218
ANXA1	4043.84	UQCRC1	1796	CD55	0.00016218
CTSF	4043.37	MKNK1	1796	DERA	0.00016218
MAPK6	4042.78	TNFAIP3	1796	RAB8A	0.00016218
CD38	4041.35	SLC3A2	1794	CA4	0.00016218
IL3	4039.92	TSHB	1794	CCL1	0.000162153
CASP7	4038.81	HLA-DRB1	1794	HTR2B	0.000162127
CD226	4036.8	LY96	1794	BPGM	0.000162127
EVL	4035.44	COL6A3	1794	GJD2	0.000162127
PHB2	4033.32	ID1	1793	FLI1	0.000162101
FCER1G	4031.31	PCK2	1792	BIRC2	0.000162101
PSMD14	4027.97	ATP5PF	1792	TUBB2A	0.000162101
CIR1	4026.86	RHOBTB1	1792	RXRG	0.000162101
IL36A	4024.92	GYS1	1791	ACP5	0.000162075
CYP11A1	4018.21	LCK	1791	DRD1	0.000162048
LAMC1	4015.68	A2M	1791	CD27	0.000162048
CRLF2	4015.66	ACOX2	1790	BATF3	0.000162022
WNT10B	4014.23	PROM1	1790	DKK1	0.000162022
MYL7	4012.9	FAS	1790	CDK7	0.000161996
FGF9	4012.2	ONECUT1	1789	PTGES3	0.000161996
CA7	4009.08	ELOVL4	1789	CACNA2D1	0.000161996
ZEB2	4008.34	PDGFD	1789	ECHS1	0.000161996
DNM3	4006.42	ADAMTS1	1789	CXCL9	0.00016197
IP6K1	4003.27	GPI	1788	GNG12	0.00016197
CACNA2D1	4001.66	GABARAP	1788	CD38	0.00016197
UBE2E3	4001.13	NDUFS2	1788	INHA	0.000161943
ARPC3	4000.62	CFH	1788	CCNA1	0.000161943
MYLK2	3999.81	DHCR24	1787	BCL2A1	0.000161943
CYP1A1	3997.1	RYR1	1787	HLA-DMA	0.000161943
BNIP3	3995.9	SLC1A5	1786	ETV6	0.000161917
CCR4	3994.12	PTGES3	1786	ARPC3	0.000161917
STRADB	3992.1	TUBB2A	1786	ATP6V0E2	0.000161917
LIPA	3991.73	CD14	1786	CASP3	0.000161865
GYG1	3991.31	PLCG2	1786	CAV3	0.000161838
SNAI1	3990.55	ATP2B1	1786	PLCB1	0.000161812
MYL12B	3987.84	SIPA1	1785	PROX1	0.000161812
CXCR2	3987.27	SDC2	1785	COL4A2	0.000161812
CYP19A1	3986.9	DUSP6	1785	UGP2	0.000161812
HLA-DRB1	3983.06	PKMYT1	1784	PPT1	0.000161812
CD3D	3982.08	CA3	1783	SYK	0.000161786
FUCA2	3976.08	PYCARD	1781	ARPC5	0.000161786
ECI2	3970	CDKN1B	1781	NTNG1	0.000161786
FLI1	3969.48	NCOR2	1781	CTSV	0.000161786
KEAP1	3968.98	TLX1	1780	CLDN14	0.00016176
DAGLA	3961.1	SERPINC1	1780	HSPA2	0.00016176
INS	3956.14	DERA	1779	ANGPTL4	0.00016176
EDNRB	3954.96	IL18	1779	MITF	0.000161734
DRD1	3951.56	NRAS	1779	PDGFC	0.000161734
GPX2	3950.33	NCF2	1778	GREM1	0.000161734
NTNG1	3946.51	F13A1	1778	F13B	0.000161734
GABRB2	3945.21	G6PC2	1777	WASF3	0.000161734
CETP	3937.36	MDH1	1777	DSPP	0.000161734
ATP6AP1	3936.46	CFHR2	1777	PPIF	0.000161708
HADH	3936.24	SERPINB2	1777	LMO2	0.000161708
NF1	3934.99	PSMC1	1777	SLC8A2	0.000161708
PTGER2	3933.67	PLPP2	1776	ZFHX3	0.000161681
PSMB10	3933.34	NOS2	1776	MDH1	0.000161681
IL18	3930.74	PSMC3	1776	CCNG1	0.000161681
UGP2	3927.96	SLC27A2	1775	ATP1B1	0.000161655
CAV3	3926.33	FER	1775	CCL2	0.000161655
SERPINB2	3922.94	RELA	1775	MPZ	0.000161655
MDM2	3922.5	P2RX1	1774	S100A9	0.000161655
SH2D2A	3922.41	ATP6V0C	1773	PLA1A	0.000161655
PPT1	3922.31	CTF1	1773	ACP2	0.000161655
SCP2	3921.95	CASP7	1773	FGF9	0.000161629
SHOC2	3915.3	ADH1A	1773	CTNNA3	0.000161629
UBE4A	3915.09	IFNA7	1772	ACVRL1	0.000161603
PSMB3	3913.16	PPIF	1772	AFP	0.000161603
COL4A4	3911.63	DGKI	1772	GABARAPL2	0.000161603
CCL2	3911.33	CCR5	1772	TP53I3	0.000161603
CA3	3909.88	EBI3	1771	GLUD1	0.000161577
THBS2	3903.81	SERPINF2	1771	SRD5A2	0.000161577
HYAL4	3903.5	PIK3CG	1770	MT-CO2	0.000161577
DAPK2	3903.42	SPP1	1770	CAMK1D	0.000161551
RRAGA	3899.66	MDM2	1769	TBC1D1	0.000161551
CYFIP2	3897.32	FGG	1768	LAMB1	0.000161551
CDH2	3894.58	SCP2	1767	AMOT	0.000161551
DRAM1	3894.13	MAP3K8	1767	HACD1	0.000161551
SDC1	3894.05	CUL1	1767	RHOBTB1	0.000161551
RHOBTB1	3893.89	PARD6A	1766	SLC27A2	0.000161551
HACD1	3893.35	ID4	1766	LEFTY1	0.000161551
MAPK1	3893.04	ATG2A	1765	CFH	0.000161499
SYK	3892.82	CORO1A	1764	GSTA3	0.000161499
GREM1	3891.64	ATP1B1	1764	NCF4	0.000161499
FRMD1	3891.21	ROR2	1764	INS	0.000161499
PPIF	3891.14	CACNA2D1	1763	PTCH2	0.000161499
ARHGAP17	3890.42	UGP2	1762	TRHR	0.000161473
CCND1	3889.73	RASAL2	1762	FBN1	0.000161447
TNF	3884.69	HK3	1761	ROR2	0.000161421
NDUFB5	3884.46	CLCF1	1761	CYP1A1	0.000161421
IL15RA	3884.41	SLC22A1	1761	DGKI	0.000161394
MLH1	3883.06	INHA	1761	TNFRSF13B	0.000161394
RAC3	3882.63	FZD7	1761	DKK2	0.000161368
TNFSF13	3881.11	GLA	1759	FZD7	0.000161368
RXRG	3880.86	PSMA4	1759	CYFIP2	0.000161342
SERPINC1	3879.9	PRKD1	1759	FZD4	0.000161342
PLAT	3878.52	EVL	1758	CCL25	0.000161342
GJD2	3877.59	RHOBTB2	1758	DUSP5	0.000161342
ESR2	3875.83	DCC	1758	PPP1CA	0.000161316
OXTR	3874.49	CDK14	1758	UBE2E3	0.000161316
CCL7	3871.47	ORAI3	1757	SHOC2	0.000161316
ENO1	3870.86	CAV3	1757	UQCRC1	0.00016129
CSNK2B	3868.11	DGKG	1757	COL6A3	0.000161264
PPP1CA	3867.9	CA10	1757	CCR7	0.000161264
ENO3	3867.13	PTGS1	1757	CCL11	0.000161264
INPPL1	3867.03	CETP	1756	LGALS3	0.000161264
PROM1	3865.38	SH2D2A	1756	IL17B	0.000161212
FGF23	3862.41	VDAC2	1756	CA11	0.000161212
LAMB1	3862.27	CHRM3	1756	DUSP6	0.000161186
MPZ	3861.77	PTK2	1756	ACADM	0.000161186
WNT7A	3861.06	RGL2	1755	KEAP1	0.000161186
FBXO4	3858.55	C3AR1	1755	MAPK1	0.00016116
DROSHA	3854.63	ADIPOQ	1754	GNAQ	0.000161134
LHX5	3853.91	FGF23	1754	F13A1	0.000161134
BDKRB2	3851.2	SMAD3	1754	MAPK8IP1	0.000161134
ADH1A	3844.76	CLDN8	1753	IL7	0.000161108
PLCB1	3840.53	MGAM	1753	IL18R1	0.000161108
AFP	3839.05	RXRG	1753	G6PD	0.000161108
TRHR	3835.95	AP3S1	1752	FRMD1	0.000161108
ID1	3835.45	CD82	1752	CACNA1S	0.000161082
CHAD	3834.88	AGPAT4	1752	PTPN13	0.000161057
CD82	3832.04	CLDN5	1751	NECTIN3	0.000161057
PDGFC	3831.64	ADGRB1	1751	VTCN1	0.000161057
PLK2	3831.52	CYP4F3	1751	CYP19A1	0.000161031
ACSM3	3830.42	TBL1XR1	1751	AGL	0.000161031
IL3RA	3829	MPDZ	1751	WNT7A	0.000161031
RPS6KB2	3824.84	RAF1	1751	KLF4	0.000161031
GNAQ	3824.07	BATF	1750	SV2A	0.000161031
TLR2	3818.46	TUBB4A	1749	CYP11B2	0.000161031
GRB2	3816.98	GPX2	1749	CTSF	0.000161031
CXCL16	3816.42	RAB8A	1749	MKNK1	0.000160979
IL2RB	3812.41	CCR7	1749	PTK2B	0.000160953
RAB8A	3811.99	BATF3	1749	CA3	0.000160953
CCL11	3809.51	DUSP10	1749	RRAS	0.000160953
STAT3	3808.26	PPARGC1A	1749	MAPK6	0.000160927
OXCT1	3807.53	ADRA1B	1749	LMO3	0.000160927
DHRS11	3807.12	MBP	1749	WASF2	0.000160927
TGFBR1	3806.71	RAB5C	1748	CDC37	0.000160927
NPY1R	3804.66	CDC37	1747	MANBA	0.000160927
RASA1	3803.98	SLC10A1	1746	DUSP3	0.000160901
CBR1	3803.86	CCNG1	1746	C3AR1	0.000160901
GNG12	3802.55	RAPGEF2	1746	DUSP10	0.000160901
PTPN13	3797.66	GNS	1746	DAGLA	0.000160901
OLR1	3796.54	CLDN7	1745	LILRA3	0.000160901
SOD2	3790.81	NDUFV2	1745	MAP2K4	0.000160875
SLC8A2	3789.58	ADIPOR2	1745	ITK	0.000160875
PAK6	3786.61	ACADM	1744	NOD2	0.000160875
CAMK1D	3785.28	SLC27A3	1744	IP6K1	0.000160875
ACTB	3784.51	HLA-B	1744	LHX5	0.000160875
CCN2	3783.81	PSMC5	1744	ACO1	0.000160849
NDUFA8	3783.33	ADCY8	1744	FXYD2	0.000160849
AMOT	3783.05	MAPK8	1744	ACKR4	0.000160849
ELOVL6	3781.97	TYROBP	1743	BMP3	0.000160823
CA11	3776.38	PSMB10	1743	CSNK2B	0.000160798
GSTO1	3774.77	GABRA1	1743	C9	0.000160798
INHA	3771.73	GSTA3	1742	NEUROG1	0.000160798
TNFRSF13B	3771.05	CXCL16	1742	CNTN1	0.000160772
SDHA	3769.49	PIP4K2C	1741	MAP4K4	0.000160772
LY96	3768.59	TRIM16	1741	CD53	0.000160772
LIF	3763.06	UBE2E3	1741	LMO7	0.000160772
SLC16A4	3763	TNFSF13	1741	IKBKE	0.000160772
PTTG1	3762.97	CHUK	1740	A2M	0.000160772
TUBB2B	3762.91	STIM1	1740	EVL	0.000160772
NR2C2	3762.4	LMO2	1740	FADS3	0.000160772
GALC	3761.82	TJP1	1740	RYR1	0.000160746
LCN2	3760.01	PRDX1	1739	RHOBTB2	0.000160746
MAPK8IP1	3758.12	LYL1	1738	FYN	0.00016072
MYL6B	3754.99	ADM	1738	HEY1	0.00016072
MMP9	3754.39	HLA-DMB	1738	TWIST1	0.00016072
WASF3	3751.67	CCL2	1737	BAMBI	0.00016072
GNG4	3751.25	CSNK2B	1737	SERPIND1	0.00016072
PLA2G4D	3748.71	KLF4	1737	PPP2CA	0.000160694
FGF3	3745.71	FGF6	1736	AGTR1	0.000160668
PRKAG1	3745.24	CCNA1	1736	GRB2	0.000160643
CACNA1C	3740.49	IL15	1736	HLA-B	0.000160643
CCL16	3737.12	VCP	1736	CBR1	0.000160643
NPR1	3737.04	CHI3L2	1735	CCL16	0.000160643
PIK3R2	3734.26	IL3RA	1735	ICAM4	0.000160643
AKR1C3	3732.63	NR2C2	1735	MEF2C	0.000160617
ARPC5	3729.98	LARGE1	1735	C8B	0.000160617
ORC1	3729.05	MECOM	1735	ETV4	0.000160617
RHOBTB2	3728.72	CTNNA1	1735	PRKCA	0.000160591
TYK2	3725.17	ACSL5	1734	ACTB	0.000160591
ULK1	3722.86	MAPK9	1734	CDC20	0.000160591
PRKG2	3722.78	IL7R	1734	VSIG4	0.000160591
POU3F3	3722.23	ARSB	1733	FZD9	0.000160591
APOA4	3719.88	SMAD6	1733	FUT8	0.000160565
F13B	3716.52	PDGFRA	1732	FHL1	0.000160565
SUCLG2	3715.87	CLTCL1	1731	SCT	0.000160565
C3AR1	3714.29	PLK2	1731	CD40LG	0.000160539
FEV	3714.04	MAP2K6	1731	HEYL	0.000160539
PIK3CA	3712.4	EP300	1731	IL13RA2	0.000160539
APC	3711.59	CCL25	1730	IL13	0.000160539
PTK2B	3710.66	TRPV4	1730	ESR1	0.000160514
PROX1	3710.41	AFP	1730	NCOA1	0.000160514
NEUROG1	3709.27	PAK6	1730	TNFAIP3	0.000160514
JARID2	3708.75	PCNA	1730	CNTN2	0.000160514
LMO3	3706.22	SLC19A2	1729	CCR3	0.000160488
FZD6	3705.73	IL3	1729	INPPL1	0.000160488
AMBRA1	3705.11	ARPC3	1729	CHRM2	0.000160462
PSMC1	3701.46	SLC2A4	1727	CXXC4	0.000160462
CD53	3698.21	IL15RA	1727	SLC2A4	0.000160462
HSPA2	3698.09	CA14	1726	NOTCH1	0.000160436
VTCN1	3696.72	AP1M2	1726	ARSB	0.000160436
CCR7	3695.46	SPHK1	1726	CYP7B1	0.000160436
CFD	3694.92	RASA1	1726	TUBB2B	0.000160436
CD55	3691.04	INSR	1725	LTC4S	0.000160436
FGF6	3690.86	ITK	1724	SERPINC1	0.000160411
PSMB8	3690.09	PFKFB3	1724	CCL7	0.000160411
HTR2B	3689.58	NPR1	1724	TLR1	0.000160411
ACP5	3687.65	GDF10	1724	MAF	0.000160385
DDB2	3687.37	RPS6KA2	1724	HRAS	0.000160385
ACTC1	3686.96	CACNA2D2	1722	PTGS1	0.000160385
F7	3686.37	PTGS2	1722	ARNT2	0.000160385
ETV6	3686.06	RAB3A	1721	JARID2	0.000160359
NOTCH1	3680.59	MGRN1	1720	C5AR1	0.000160359
ADH1C	3679.8	CLDN14	1720	CLDN1	0.000160359
LCK	3679.17	PFN1	1720	TNFRSF10D	0.000160359
PLTP	3667.21	IL32	1720	GRK1	0.000160333
CXXC4	3666.93	MAP3K1	1720	AXIN1	0.000160308
TP53	3665.03	TRAF6	1720	SCP2	0.000160308
MINPP1	3661	ATP6V0B	1719	TYK2	0.000160308
ZYX	3659.85	ALCAM	1719	MYLK2	0.000160308
MKNK1	3654.41	SNAI1	1718	ATP4A	0.000160308
IL7	3653.17	CD3D	1718	PLK1	0.000160282
GNG10	3650.32	IL12RB2	1718	PSMB3	0.000160282
CD3G	3650.09	ATP1A2	1718	SOD2	0.000160282
PIK3CB	3646.46	MLH1	1717	SPATA2L	0.000160282
CA4	3644.77	SLC16A1	1717	GSK3B	0.000160256
GSN	3643.13	POU3F3	1716	SYT1	0.000160256
SLC25A5	3639.62	GADD45G	1716	CACNA1C	0.000160256
ATP6V1G2	3639.09	NEDD4L	1716	GUCY1B1	0.000160256
WASF2	3633.22	GALC	1715	GABRB2	0.000160231
NCF2	3631.34	PLCG1	1715	IL12RB2	0.000160231
DKK2	3629.57	PIK3C3	1714	IRF3	0.000160231
ATP1B1	3629.04	ACADVL	1714	ACSM3	0.000160231
SLC16A1	3628.47	SHC2	1714	RRAGA	0.000160231
NECTIN3	3628.14	TYK2	1714	STIM1	0.000160205
DKK1	3627.29	IFNA17	1713	MSN	0.000160205
BATF3	3625.93	MOS	1712	VCAN	0.000160179
GADD45G	3625.9	ACP5	1712	DGKA	0.000160179
CDK6	3621.1	CCL11	1711	CIR1	0.000160179
GRK1	3620.95	ACSL4	1711	STRADB	0.000160154
CCNA1	3620.77	MYH10	1711	PAK6	0.000160154
CD40LG	3619.7	PPT1	1710	LILRB3	0.000160154
NLK	3619.48	LIF	1710	GPX4	0.000160154
AHCY	3618.38	F7	1710	PRNP	0.000160128
ARSB	3616.23	HMOX1	1710	ADCY8	0.000160128
IQGAP1	3616.04	CHEK2	1710	ERN1	0.000160128
CHUK	3614.84	FGF2	1710	ECI2	0.000160128
IL17B	3613.6	FOS	1710	SLC2A6	0.000160128
CLDN4	3613.39	AHCY	1709	APOB	0.000160102
ICAM4	3609.27	NFKBIE	1709	COL1A2	0.000160077
LEFTY1	3606.47	CHAD	1708	JAG1	0.000160077
GDF10	3606.42	EPAS1	1708	PCP4	0.000160077
ACO1	3605.08	CDIPT	1707	ITPR1	0.000160051
SIPA1L1	3604.93	ECHS1	1706	MAP3K8	0.000160051
SP1	3604.36	VCAN	1706	EDA2R	0.000160051
BASP1	3602.94	RPS6KA3	1705	PSMD14	0.000160026
TP53I3	3602.51	PSMD3	1705	TGFBR1	0.000160026
C9	3601.28	PSMA1	1705	ZFP36L1	0.000160026
DGKA	3599.53	OLR1	1704	GNS	0.000160026
SCT	3598.46	C9	1704	NCF1	0.000160026
FZD7	3598.17	BCL2A1	1704	MT2A	0.000160026
PPBP	3597.92	CYP7B1	1704	CXCL8	0.00016
AAMP	3597.85	TGFA	1704	PRKAG1	0.00016
G6PD	3596.92	NBL1	1703	MT-CO1	0.00016
DUSP5	3596.45	UBE4A	1703	CCND2	0.000159974
COX10	3595.12	CD40LG	1703	GRK5	0.000159949
CAMK2D	3592.8	CD8A	1703	PIK3R2	0.000159949
RYR1	3592.4	PTPN14	1703	PLAU	0.000159949
NFKBIE	3591.12	PLA2G3	1702	MYL12B	0.000159949
BCL2A1	3589.15	CS	1702	GABRA1	0.000159923
CCR3	3588.23	KEAP1	1702	ULK1	0.000159923
ANGPTL4	3586.49	HSPA2	1702	CD1D	0.000159923
PROCR	3585.95	RIMS1	1700	MYLPF	0.000159923
ELANE	3585	EDN1	1700	GNA14	0.000159898
ACKR4	3583.62	COX8A	1699	PSMB10	0.000159898
RASAL2	3582.59	SERPINA1	1699	CD3D	0.000159898
MMP2	3581.61	MT-ND4	1698	BNIP3	0.000159898
DCC	3579.4	CCL17	1698	SELE	0.000159898
MAP4K3	3576.89	BNIP3	1698	YY1AP1	0.000159898
CARM1	3576.33	CBR1	1697	AIFM1	0.000159898
CCL27	3575.09	UBE2M	1697	ELOVL6	0.000159872
DUSP10	3573.83	WIF1	1697	IL6	0.000159872
MAD1L1	3573.22	SCD	1696	PSMC4	0.000159847
NRAS	3571.53	IL6	1696	ARHGEF1	0.000159847
TSC1	3566.77	MSN	1696	LILRB5	0.000159847
ACADL	3564.78	ATP6V0E2	1695	KAT2A	0.000159821
CLPS	3563.93	CTSC	1695	PIK3CB	0.000159795
IL15	3561.42	TCIRG1	1694	ACSL4	0.000159795
PROS1	3559.51	CRLF2	1694	OXCT1	0.000159795
ROR2	3553.79	GABARAPL2	1693	SIPA1L1	0.00015977
HLA-B	3552.38	CYP1A1	1693	RPS6KA2	0.00015977
MCM2	3548.08	STAT5B	1693	COX8A	0.00015977
LMO7	3547.19	VTCN1	1692	APOE	0.00015977
APOB	3547.16	GUCY1B1	1692	FGF3	0.00015977
FZD9	3546.17	C5AR1	1692	MAD1L1	0.00015977
BMP3	3545.83	HEY1	1691	AQP1	0.00015977
GRK5	3545.22	APOE	1691	LPIN2	0.00015977
ATG4A	3542.07	FOXO1	1691	PSMB8	0.000159744
HMOX1	3541.71	IL36A	1690	UBE4A	0.000159744
SLC22A2	3541.44	SOD2	1690	SLC16A4	0.000159744
MAP4K4	3540.96	CD3G	1690	SCUBE2	0.000159744
HRC	3539.99	CA4	1690	IQGAP1	0.000159719
IFNG	3538.03	MCM2	1690	NRXN3	0.000159719
ALOX12	3535.87	GRM3	1690	HLA-DMB	0.000159719
RPS6KA2	3535.46	ARHGEF1	1688	STX1A	0.000159719
PPA1	3533.45	CCL16	1688	RAB7A	0.000159693
MSH2	3532.48	NRCAM	1688	CTNND2	0.000159668
TBC1D1	3530.19	F13B	1687	FGF20	0.000159668
PTCH2	3529.91	LPAR4	1687	CREB3L2	0.000159642
STIM1	3529.69	SHC1	1687	DDB2	0.000159642
BDKRB1	3528.85	CDK2	1687	RAC3	0.000159642
PPARGC1A	3527.08	MPZ	1686	ALOX12B	0.000159642
HLA-DMA	3524.81	CSNK2A1	1686	ITGB1	0.000159617
NCF4	3522.94	AGPAT2	1685	PDGFD	0.000159617
FYN	3522.94	TLR5	1685	SPP1	0.000159617
CD14	3522.72	NCF4	1685	CISH	0.000159617
S100A9	3520.04	FHL1	1685	APOA4	0.000159617
PRICKLE3	3519.13	VSIG4	1685	NRP2	0.000159591
SCRIB	3517.64	NLGN1	1685	RAB5C	0.000159591
RELT	3516.32	PTAFR	1684	EEF2	0.000159591
CACNA1S	3514.66	CNTN2	1683	ELANE	0.000159591
SLC2A6	3513.06	F2R	1683	HRC	0.000159591
FUT8	3512.98	DCN	1683	F8	0.000159591
FABP2	3511.58	DGKA	1682	CADM1	0.000159566
AQP8	3509.19	C8B	1682	SLC25A5	0.000159566
RPS6KA3	3505.62	MAPK10	1682	ACTN1	0.000159541
MOK	3501.89	NTSR1	1682	LPL	0.000159541
PSMC6	3500.27	LEF1	1682	STX3	0.000159541
CHEK2	3500.24	RET	1682	ARHGEF4	0.000159541
HSP90AB1	3494.67	FGF20	1680	FZD6	0.000159541
CTNND2	3492.39	IGFBP3	1680	CTSG	0.000159515
OGDH	3491.36	PTTG1	1679	TNFSF9	0.000159515
VDAC2	3489.97	PIK3CD	1679	PTPN14	0.00015949
MAF	3489.53	PXN	1679	IL1R2	0.00015949
GPX7	3485.33	EEF2	1678	PPBP	0.000159464
PITX2	3484.77	EFNA1	1678	ALOX12	0.000159464
PCP4	3484.12	AKR1C3	1678	HYAL4	0.000159464
PTGDS	3483.61	PSMA5	1678	THBS4	0.000159439
RAB7A	3482.45	MAP3K7	1678	RPS6KA3	0.000159413
ACVRL1	3480.76	WNT10B	1677	WIF1	0.000159413
DUSP3	3480.16	IL18R1	1677	DGKG	0.000159388
ATP5F1A	3479.98	IFNAR1	1677	PGAM2	0.000159388
TMSB4Y	3479.27	MMP3	1677	AQP8	0.000159388
DGKI	3478.45	FRAT2	1675	ATP1A2	0.000159363
UBE2M	3475.96	MYLK2	1675	PHB2	0.000159363
IL13	3475.38	COX10	1675	ZFP36	0.000159363
MITF	3473.68	SV2A	1674	SP1	0.000159337
MYLPF	3473.02	SHOC2	1674	PIP4K2A	0.000159312
ITPR1	3472.28	PPBP	1674	VDAC2	0.000159312
BAMBI	3471.94	PIK3R3	1674	PRKG2	0.000159312
MAP4K1	3471.14	PRKCB	1674	AVP	0.000159312
PRKCA	3470.62	MYL7	1673	PSAP	0.000159312
TNFRSF10D	3470.54	PLTP	1673	AGPAT4	0.000159286
ERN1	3468.37	IRF3	1672	SLC16A1	0.000159286
ETV4	3467.66	MANBA	1672	JUNB	0.000159286
FZD4	3465.12	PDCD1	1672	IFNG	0.000159261
CCL24	3464.05	ITGA4	1672	IL6R	0.000159261
CDKN1B	3463.34	ATP6AP1	1671	MOK	0.000159261
TAMALIN	3463.14	ITGA8	1671	PIK3CA	0.000159236
DGKG	3459.27	SLC8A2	1670	IRS1	0.000159236
GAA	3458.8	PRKAG1	1670	SHC3	0.000159236
FBN1	3458.74	ZYX	1670	JAM2	0.000159236
FABP6	3452.91	ROR1	1670	SCD5	0.000159236
ACTR3	3450.21	ALDOC	1669	IFNB1	0.000159236
CNTN1	3448.44	FGF3	1669	COL9A3	0.000159236
BCL2	3447.79	G6PD	1669	ALDOA	0.000159236
UBE2S	3446.61	IFNGR1	1669	MYBL2	0.000159236
DEPDC5	3445.15	P2RY1	1669	MET	0.00015921
ERBB4	3441.93	ABCC3	1668	GRM3	0.00015921
TBL1XR1	3441.42	CA7	1667	IL10	0.00015921
SRD5A2	3440.72	S100A9	1667	AKR1D1	0.00015921
NANOG	3440.31	LPL	1667	ALDH9A1	0.00015921
FXYD2	3438.88	TLE4	1667	PARP4	0.00015921
MPDZ	3437.81	CYP27B1	1666	ATG4D	0.00015921
DVL1	3433.13	CTSV	1666	JAK1	0.000159185
PSMC5	3432.37	TWIST1	1666	FCGR2B	0.000159185
HOXA1	3432.01	SHC3	1666	ADPGK	0.000159185
ITGB1	3429.08	KLKB1	1665	IL15	0.000159134
KCNK2	3426.77	CACNA1E	1665	IFNGR1	0.000159134
LPIN2	3422.49	CCR6	1664	ABCC3	0.000159134
CA10	3422.4	PROS1	1664	CHMP7	0.000159134
KLKB1	3421.06	BMP3	1664	CLPS	0.000159134
ADM	3419.18	ZAP70	1664	MLH1	0.000159109
PSMC3	3418.5	LGALS3	1664	SLC5A1	0.000159109
MAP3K8	3417.64	JAK2	1664	CDK6	0.000159084
NCOA1	3412.55	TEAD3	1663	AHCY	0.000159084
RAB5C	3411.58	ULK1	1663	AKR1C4	0.000159084
KLF4	3408.9	BAMBI	1663	FUCA2	0.000159084
NCF1	3407.78	CREB3L2	1663	SUCLG2	0.000159058
ATP4A	3407.78	TNFRSF12A	1662	CTSC	0.000159058
CD8A	3407.32	FXYD2	1662	SLC22A2	0.000159058
MCM3	3406.97	NOD2	1661	FOXO4	0.000159058
GNB1	3405.94	SELE	1661	ATP2B1	0.000159033
FOXO4	3401.49	INS	1660	GNG10	0.000159033
SLC5A1	3401.35	MAPK8IP1	1660	ITGA1	0.000159033
VMP1	3399.45	PPP2R3A	1660	PIK3C2G	0.000159033
FGF8	3397.89	DDB2	1659	ERBB4	0.000159008
F8	3397.4	ATP4A	1659	SDHA	0.000159008
AVP	3395.96	ADCY7	1659	TNFSF4	0.000159008
LMO2	3395.92	MAPKAP1	1658	MYL6B	0.000159008
COL6A3	3395.18	PIP5K1B	1658	PPARGC1A	0.000158983
DGAT1	3394.85	IL1RAP	1658	ADRA1B	0.000158983
SLC17A5	3393.78	CCR1	1658	KLKB1	0.000158983
PLAAT3	3389.56	CXCL3	1657	CA5A	0.000158983
SI	3386.38	HEYL	1657	SMAD1	0.000158957
FABP1	3386.31	TLN2	1656	AR	0.000158957
MMACHC	3383.97	CLDN1	1655	PTGS2	0.000158957
TUBA8	3380.22	CFD	1655	FGF2	0.000158957
CREB3	3379.26	RYR2	1655	CD3G	0.000158957
CXCL3	3377.86	LEFTY1	1654	IGFBP3	0.000158957
PORCN	3375.58	PTPN1	1654	CARM1	0.000158957
FADS3	3372.61	PLD1	1654	MAP1LC3C	0.000158957
MAML1	3371.75	LAMA1	1654	CACNA1F	0.000158957
RPIA	3371.53	DUSP5	1653	ATP5PF	0.000158932
TNFAIP3	3368.57	ANGPTL4	1653	ADAMTS1	0.000158932
YWHAQ	3363.86	HMGB1	1653	CFI	0.000158932
FHL1	3358.26	HTR5A	1653	CBR3	0.000158932
ADPGK	3357.12	FOXG1	1653	GSTO1	0.000158932
IFNA21	3353.94	KAT2A	1652	NDUFV2	0.000158907
MAP3K4	3352.82	GJD2	1652	HOXA1	0.000158907
GUCY1B1	3352.71	SERPIND1	1652	ADCY3	0.000158907
PAX6	3352.27	FZD2	1652	PLAAT3	0.000158907
ALDH9A1	3351.65	CCL1	1651	NTSR1	0.000158881
NRP2	3351.5	CLDN9	1650	UBE2M	0.000158856
LEPR	3349.92	SDHA	1650	PRICKLE3	0.000158856
RAPGEF2	3349.65	ORC1	1650	ATP6V0A4	0.000158856
COL4A2	3348.67	IL12B	1650	IL7R	0.000158831
IRS1	3347.17	TAOK3	1650	MAP2K6	0.000158831
ANK3	3346.8	ITPR2	1650	IFNA21	0.000158831
TWIST1	3344.82	CHD8	1649	PARD3	0.000158806
SMAD6	3344.21	CYP11B2	1649	SCD	0.000158806
IGF1R	3343.69	ACSM3	1649	KCNK2	0.000158806
CFH	3343.41	ICAM4	1649	GBP2	0.000158806
HEY1	3342.44	CASP8	1649	RELT	0.000158806
CCR10	3340.15	COX6C	1648	DLX5	0.000158806
GNA14	3339.94	CCL7	1648	NRAS	0.000158781
A2M	3338.73	OGDH	1648	PSMC1	0.000158781
HDAC4	3337.62	ETV4	1648	MPDZ	0.000158781
HPGDS	3336.1	MCM3	1648	EDN1	0.000158781
HEYL	3334.33	ITGA9	1648	FLT3	0.000158781
CYC1	3333.61	PHB2	1647	CCL27	0.000158781
PLCG2	3332.22	PROCR	1647	IL12B	0.000158755
CYP7B1	3331.98	MAD1L1	1647	PAX6	0.000158755
ARNT2	3331.83	KCNK2	1647	MKNK2	0.000158755
SDC2	3330.45	ELOVL7	1647	PITX2	0.000158755
IL34	3327.44	IRAK1	1647	RASAL2	0.00015873
KAT5	3327.41	MAP3K4	1646	TGFA	0.00015873
HSD17B4	3326.96	FLT1	1646	ELOVL7	0.00015873
AKR1C4	3326.74	FEV	1645	ATP6V1G2	0.00015873
C8B	3326.73	PTGFR	1645	F5	0.000158705
DDX5	3326.69	ADH1C	1644	LCN2	0.000158705
TAB1	3326.48	NCF1	1644	NDUFS2	0.00015868
SCD	3326.05	IL13RA2	1644	NF1	0.00015868
ELOVL7	3324.51	FCGR2B	1644	VDR	0.00015868
PIK3C2G	3321.76	F11	1644	HTR6	0.000158655
AKR1D1	3321.39	INPPL1	1643	ASL	0.000158655
ALOX12B	3320.11	RRAS	1642	CXCL3	0.000158629
APOE	3318.03	ARHGDIB	1642	FGF8	0.000158629
ACSL4	3317.74	YY1AP1	1641	CX3CL1	0.000158629
TLR1	3316.5	PRKG2	1641	AAMP	0.000158629
ACSS2	3316.07	ACKR4	1641	GNB1	0.000158604
IFNB1	3311.26	ALOX12	1641	MBP	0.000158604
MCU	3310.73	ERN1	1641	TNN	0.000158604
STX1A	3310.59	COL9A2	1641	HPGDS	0.000158604
NOD2	3310.48	ALOX5	1641	PTTG1	0.000158579
IRAK4	3310.41	ELANE	1640	UCP1	0.000158579
SEC13	3310.1	CDR1	1639	NECTIN2	0.000158579
CX3CL1	3308.37	HADH	1639	COX6C	0.000158554
FER	3307.6	CCR10	1639	CCR10	0.000158554
PFKFB4	3306.27	PPP1R3C	1639	VMP1	0.000158554
MGMT	3306	RIPK1	1639	SAT1	0.000158554
ALDOA	3304.82	MYLK	1639	PORCN	0.000158554
PIP4K2A	3304.25	MSH2	1638	NLK	0.000158529
ARHGEF4	3302.12	STX3	1638	DCC	0.000158529
GABRA1	3300.55	AQP1	1638	CREB3	0.000158529
MAP3K1	3296.8	WNT5A	1638	MYL3	0.000158529
CREB3L2	3296.32	F5	1638	MAN2B1	0.000158529
NUMB	3296.16	TGFB3	1638	CCR5	0.000158504
ADRM1	3295.29	SMURF2	1638	P2RY1	0.000158504
EDA2R	3294.31	EPHB1	1638	MCU	0.000158504
PARD3	3291.96	NFKBIA	1638	DEFA5	0.000158504
TTK	3291.77	LAMA3	1637	LPAR4	0.000158479
MAPK9	3291.33	AIFM1	1636	DGAT1	0.000158479
NCOR2	3291.18	NF1	1636	FZD2	0.000158453
ITGA4	3289.89	HLA-DMA	1636	RAPGEF4	0.000158453
NAGPA	3289.26	IL10	1636	SLC9A3	0.000158453
IL12B	3288.38	DKK1	1635	DHRS11	0.000158453
MYL3	3288.07	PPA1	1635	LILRB1	0.000158428
SERPIND1	3287.87	PAX6	1635	BMP10	0.000158428
FOXM1	3287.3	AKR1C4	1635	M6PR	0.000158428
DUSP6	3284.51	CD44	1635	NDUFA9	0.000158403
RAPGEF4	3278.71	SLC16A4	1634	MMP3	0.000158403
LARGE1	3278.58	SLC25A5	1634	ANKRD1	0.000158403
GLO1	3278.27	EYA1	1634	GLUL	0.000158403
FGF20	3278.11	TLE1	1634	IL34	0.000158403
PTPN14	3277.66	CTSG	1633	LCK	0.000158378
STX3	3276.56	ABCB4	1633	ALCAM	0.000158378
SACM1L	3273.62	ERBB2	1633	STEAP3	0.000158353
ZAP70	3272.74	FGF7	1633	SDC3	0.000158353
ADCY8	3272.71	CD1D	1632	PIP5K1C	0.000158353
GCNT2	3272.56	ACLY	1632	GPX7	0.000158353
COL1A2	3272.52	TBK1	1631	GLI1	0.000158353
IL12RB2	3271.56	WASF3	1630	RIMS1	0.000158328
LGALS3	3270.11	ATP5F1A	1630	LARGE1	0.000158303
ASL	3269.04	LPIN2	1629	ITGA4	0.000158303
PDGFD	3268.88	VDR	1629	IRAK1	0.000158303
LTC4S	3268.75	CSNK2A2	1629	PPA1	0.000158303
HHAT	3268.65	ANK2	1629	GCK	0.000158303
TM7SF2	3268.63	TBX3	1629	CFHR4	0.000158303
WIF1	3268.51	TNFRSF13B	1627	TMSB4Y	0.000158303
RAF1	3267.87	TRAF2	1627	LILRA6	0.000158303
YWHAZ	3266.56	JUNB	1627	NCOR2	0.000158278
AGTR1	3265.16	JAM2	1627	OSMR	0.000158278
TGFA	3262.81	RAP1A	1627	WNT1	0.000158278
MAP2K6	3260.97	CLTC	1627	DDIT4	0.000158278
PCNA	3258.73	GNG10	1626	CA10	0.000158253
NDUFAB1	3256.58	FARP2	1626	POU3F3	0.000158253
GSTA4	3255.92	DAGLA	1625	NRCAM	0.000158253
NRXN3	3255.37	SRD5A2	1625	TGFB3	0.000158253
ATP2B1	3253.11	ZFP36	1625	ABCB4	0.000158253
MEN1	3251.87	IP6K1	1624	PNLIP	0.000158253
PRNP	3246.21	CYP17A1	1624	MMP1	0.000158253
CNTN2	3246.2	GBP2	1624	COX10	0.000158228
IL18R1	3245.41	VAV2	1624	SFRP5	0.000158228
TNFSF9	3245.35	MAP4K3	1623	GYS2	0.000158228
NDUFB11	3243.99	FGF8	1623	PTGES2	0.000158228
CHRM2	3242.57	PRKACB	1623	PLCG2	0.000158203
SEM1	3240.81	FLT3	1623	FER	0.000158203
TBK1	3238.69	CDON	1622	PTAFR	0.000158203
NRCAM	3238.32	FZD1	1622	SYNPO	0.000158203
LGR4	3237.82	FRAS1	1621	TAMALIN	0.000158203
HLA-DMB	3237.69	NEUROG1	1620	APC	0.000158178
SCD5	3236.5	AVP	1620	NAGPA	0.000158178
IGBP1	3234.07	CCKBR	1620	MRC1	0.000158178
LILRA3	3232.44	LHX5	1619	ID4	0.000158153
ANAPC15	3222.94	SLC22A2	1619	TJP1	0.000158153
PLA1A	3222.82	CISH	1619	TJP2	0.000158153
DLX5	3222.7	CD59	1619	LEPR	0.000158153
TJP1	3221.27	SNAP25	1619	MAML1	0.000158153
CCND2	3219.88	SEC13	1618	SPINT1	0.000158153
JAG1	3219.23	IL6R	1618	YWHAZ	0.000158128
PSMA4	3218.48	IL13	1617	CDK14	0.000158128
PF4V1	3218.24	SCD5	1617	MAP4K3	0.000158128
ADRA1B	3216.76	GRK2	1617	CP	0.000158128
MECOM	3216.71	ARRB1	1617	ICAM5	0.000158128
SLC5A6	3215.29	CD36	1617	FGF17	0.000158128
FABP4	3213.16	ESR2	1616	TP53	0.000158103
ATP1A2	3209.58	JAM3	1616	ARHGDIB	0.000158103
COL9A3	3209.46	PTCH2	1615	ACSS2	0.000158103
C8G	3205.84	HTR6	1615	MECOM	0.000158078
TNFSF4	3198.79	ADCY9	1615	COL9A2	0.000158078
IRAK1	3197.05	GRK1	1614	JAM3	0.000158078
PLCG1	3196.49	RAPGEF4	1614	CAMK1	0.000158078
FZD2	3196.3	DLD	1614	CDKN1B	0.000158053
FSHB	3191.42	OSMR	1614	HTR5A	0.000158053
CFTR	3190.69	EZR	1613	RAF1	0.000158028
P2RX5	3189.14	PSMA3	1613	GALC	0.000158028
TUBB4B	3188.99	IL17B	1612	LOX	0.000158028
PRKCG	3188.93	TP53I3	1612	IL13RA1	0.000158028
CADM1	3187.85	PTEN	1612	C1QA	0.000158028
SCUBE2	3183.04	IFNAR2	1612	TXNRD1	0.000158028
ATP6V0A4	3181.03	FZD9	1611	NDUFA4L2	0.000158028
GNS	3178	IGF2R	1611	ACTR3	0.000158003
AGPAT4	3177.48	PRKAA2	1611	FAS	0.000158003
TRAF2	3176.99	TAB1	1609	MAP3K1	0.000158003
PNLIP	3176.2	LOX	1609	PERP	0.000158003
CD79A	3176.02	COL9A1	1609	CD79A	0.000158003
GCK	3175.95	ME3	1609	CYP46A1	0.000158003
CDC7	3175.86	CD40	1609	SMAD6	0.000157978
NDUFS1	3174.31	RAC3	1608	RASA1	0.000157978
F13A1	3173.05	EDA2R	1608	RPS6KB2	0.000157978
RRAGB	3172.34	LILRB3	1608	PREX1	0.000157978
NEDD4L	3171.88	SLC8A1	1608	GAA	0.000157978
SELE	3171.82	SLC5A1	1607	PTGDS	0.000157978
GYS2	3171.62	PLA1A	1607	TM7SF2	0.000157978
RASA3	3170.54	PERP	1606	CHEK2	0.000157953
M6PR	3169.54	CTSF	1606	CD8A	0.000157953
ZFP36L1	3169.25	CCL27	1606	LTF	0.000157953
SLC22A3	3168.89	PNLIP	1606	RBPJL	0.000157953
JUNB	3166.95	CFI	1606	ANK3	0.000157928
TNNC2	3166.66	STX1A	1605	PIK3CG	0.000157928
IL17C	3166.54	IL1R2	1605	DEPDC5	0.000157928
PIN1	3165.71	TJP2	1605	ATG14	0.000157928
ALCAM	3165.34	SYNPO	1605	FGFR2	0.000157903
FARP2	3163.87	NOTCH2	1604	MYH10	0.000157903
FUCA1	3161.87	CA11	1602	PLD1	0.000157903
ICAM5	3157.87	TLR1	1602	CACNB4	0.000157903
MECR	3156.12	ARHGEF4	1602	ATG4A	0.000157903
PIP5K1C	3154.28	ATG16L1	1602	IGF1R	0.000157878
CISH	3154.17	ITGA1	1602	WNT5A	0.000157878
CBR3	3150.97	APH1B	1602	TNFRSF11A	0.000157878
IL6	3147.5	PCP4	1601	SLC17A5	0.000157878
SMAD1	3145.61	IL13RA1	1601	GDF2	0.000157878
YWHAB	3144.51	ERG	1600	ITGA8	0.000157853
PDK1	3140.95	TRDN	1600	PLA2G4D	0.000157853
CRB3	3140.28	CASP1	1600	TP53INP2	0.000157853
TSPOAP1	3140.28	TLR3	1600	IL17C	0.000157853
ACTN1	3136.37	ITGAM	1600	PLA2G15	0.000157853
ATG16L1	3135.37	ACP2	1599	MSH2	0.000157828
SPINT1	3134.64	RRAGA	1599	PLAUR	0.000157828
ANKRD1	3133.78	VMP1	1599	CAB39	0.000157828
MEF2A	3132.61	FADS3	1599	GDF3	0.000157828
PNPLA2	3131.91	ADPGK	1599	IRAK4	0.000157828
PRICKLE2	3126.61	PRKCG	1599	CHUK	0.000157803
MAP1LC3C	3126.37	TP73	1599	ADCY7	0.000157803
GSTT2	3125.08	TLN1	1598	F11	0.000157803
FGFR2	3121.97	HOXA1	1597	TP73	0.000157803
CHMP6	3121.37	SOCS2	1597	CFHR5	0.000157803
MST1	3120.38	CARM1	1596	TBK1	0.000157778
CCNH	3119.76	HRC	1595	MAP4K1	0.000157778
PRCC	3119.67	IFNB1	1595	GCNT2	0.000157778
VSIG4	3119.44	RAC1	1594	PFKFB4	0.000157778
TP73	3111.76	HPGD	1593	IGF2R	0.000157754
CYP46A1	3111.23	CACNB4	1593	FSHB	0.000157754
GDF3	3111.01	NLGN4X	1593	HPGD	0.000157729
F2R	3109.71	GRK3	1593	PLPP1	0.000157729
PMP2	3109.16	GNG11	1593	CYP24A1	0.000157704
IL13RA2	3109.01	TNC	1593	PPP1R3C	0.000157679
ECI1	3108.39	MKNK2	1592	GNG11	0.000157679
IL10	3105.3	RPS6KB2	1592	DROSHA	0.000157679
CDK14	3105.23	MAP1LC3C	1592	ADRM1	0.000157679
GRM3	3104.34	ARG1	1592	INSR	0.000157654
ABCC3	3104.1	CACNB2	1592	F2R	0.000157654
PARP4	3102.95	APOA4	1591	SOCS2	0.000157654
MET	3102.11	HSP90AB1	1591	CDKN2B	0.000157654
CACNA1E	3102.08	COL9A3	1591	TBKBP1	0.000157654
RRAS	3097.25	KAT5	1590	APH1B	0.000157629
IL7R	3095.35	SCARB1	1590	TRIM25	0.000157629
PLA2G15	3095.11	OXCT1	1589	PRKCG	0.000157604
CLDN3	3093.34	SLC4A4	1589	SLC9A1	0.000157604
CA5A	3091.51	IL1R1	1589	MYLIP	0.000157604
PSMD3	3090.8	CCR8	1588	TNNC2	0.000157604
VCAN	3088.39	HSD17B4	1587	NCEH1	0.000157604
JAM2	3087.86	MGMT	1587	RAPGEF2	0.00015758
WNT1	3086.96	LILRA3	1587	PIK3R3	0.000157555
PRKACB	3085.5	PLAU	1587	CAMK2D	0.00015753
AP3B1	3083.57	LILRB5	1587	PRKD1	0.00015753
ADCY7	3082.43	ITGAL	1587	TAB1	0.00015753
MT2A	3081.69	ALDOA	1586	RRAGD	0.00015753
XBP1	3080.01	TNFSF4	1586	PSMC3	0.000157505
FCGR2B	3078.53	STEAP3	1586	PSMC5	0.000157505
BAK1	3076.81	SAT1	1586	NR2C2	0.000157505
VHL	3075.67	LCP2	1586	HMGA2	0.000157505
CD1D	3074.27	FRMD1	1585	SELPLG	0.000157505
TAOK3	3070.63	MAP4K1	1585	LAMP3	0.000157505
PPP1R3C	3070.02	SDC3	1585	CCL24	0.000157505
IFNGR1	3069.69	LPAR3	1585	NLGN1	0.00015748
SLC9A3	3068.8	TGFB2	1585	SESN1	0.00015748
DIABLO	3065.3	INHBA	1585	HSD17B4	0.000157456
DLD	3062.34	CACNA1S	1584	CH25H	0.000157456
TXNRD1	3060.15	LEPR	1584	CTNNA1	0.000157431
SESN1	3058.63	IKBKG	1583	FOS	0.000157431
PIK3CG	3058.36	APOH	1583	TLE4	0.000157406
MBP	3051.74	PAK2	1583	ZAP70	0.000157406
LILRB3	3050.97	CTSB	1583	SLC22A3	0.000157406
PRKD1	3049.38	VWF	1583	CD19	0.000157406
AQP1	3047.32	CD79A	1582	PNPLA2	0.000157406
SRC	3046.56	CD4	1582	YWHAB	0.000157381
FGF17	3044.01	PECAM1	1582	RHOA	0.000157381
CTSG	3042.9	MT-CO2	1581	MDM2	0.000157381
LPAR4	3041.77	UCP1	1581	ITPR2	0.000157381
WNT5A	3039.78	PGAM2	1581	ANGPT4	0.000157381
HMGB1	3037.51	DSPP	1581	IL1RL2	0.000157381
SPP1	3037.12	TSC1	1581	CCR6	0.000157356
PPP2R3A	3036.17	CAT	1581	PTGFR	0.000157356
VPS4A	3033.56	HMGA2	1580	NAPA	0.000157356
CCR5	3032.34	ARAF	1580	CD1C	0.000157356
PTGS1	3032.21	TRIM25	1578	WIPI1	0.000157356
FLT3	3031.69	ADCY3	1578	IL1RAP	0.000157332
TLE2	3030.48	LMBRD1	1578	IDO1	0.000157332
MAPK10	3029.66	MAGI1	1578	HOXD10	0.000157332
HOMER1	3029.66	ARHGEF12	1578	NRBF2	0.000157332
MYH10	3026.39	LPAR1	1578	SEC13	0.000157307
ITPR2	3024.48	BMP2K	1577	MGMT	0.000157307
SLC4A2	3024.37	CTBP2	1577	BAK1	0.000157307
MYL4	3021.66	RSPO3	1576	SLC5A6	0.000157307
NLGN1	3020.32	GRM2	1576	RYR2	0.000157282
F11	3020.1	AXL	1576	MCM3	0.000157282
CAB39	3019.68	MYBL2	1575	P2RX5	0.000157282
PTGFR	3017.83	DROSHA	1575	GLO1	0.000157282
COX6B1	3016.43	CCNH	1575	FUCA1	0.000157282
ARHGDIB	3013.25	EDNRA	1575	NEDD4L	0.000157257
EFNA3	3011.51	GPX4	1574	TAOK3	0.000157257
ATP5MC1	3010.24	F8	1574	MYLK	0.000157233
ANGPT4	3009.75	CAPN1	1574	CD59	0.000157233
PDCD1LG2	3007.36	SLC9A1	1574	PPP2R3A	0.000157208
LMNB2	3006.52	ANK1	1573	ITGA9	0.000157208
GLI1	3005.21	DOCK4	1573	RSPO3	0.000157208
PREX1	3004.78	MYL12B	1572	DOCK1	0.000157208
PSMA1	3001.68	TUBB2B	1572	UBE2S	0.000157208
PI4KA	3000.31	SLC22A3	1572	PRCC	0.000157208
PTPRR	2999.81	ANKRD1	1572	TLN2	0.000157183
HERC1	2999.16	CAMK1	1572	CD2	0.000157183
RIMS1	2998.75	RPS6KA5	1572	DVL1	0.000157183
COX5A	2995.52	TNFSF10	1572	FABP1	0.000157159
RPS6KA4	2995.51	DAAM1	1572	MYL4	0.000157159
IL1R2	2994.91	SEM1	1571	TUBA8	0.000157159
TRIM25	2994.54	PFKP	1571	HHAT	0.000157134
IDO1	2992.6	REL	1571	APOC3	0.000157134
HTR5A	2992.07	HGF	1571	TEAD4	0.000157134
C5AR1	2991.99	HYAL4	1570	SMAD3	0.000157109
COL9A2	2991.61	PRICKLE3	1570	TLE1	0.000157109
COQ10A	2990.21	AKR1D1	1570	GRK2	0.000157109
RSPO3	2989.04	MAPKAPK2	1570	NOTCH2	0.000157109
MACROH2A2	2989.02	CHMP7	1569	CASP1	0.000157109
RAP1A	2987.19	MAP2K5	1569	CBS	0.000157109
PSAP	2986.7	TEK	1569	CYTH3	0.000157109
IL1RL2	2985.7	FUCA2	1568	FOXO1	0.000157085
IL6R	2985.21	ALDH3A2	1568	FRAS1	0.000157085
ABCG5	2984.36	C1QA	1568	GPR3	0.000157085
TBKBP1	2983.53	MTOR	1568	INSRR	0.000157085
SFRP5	2982.04	RELT	1567	NQO1	0.00015706
SOS1	2979.72	AQP8	1567	CLDN4	0.00015706
MAP3K11	2978.98	TNFRSF10D	1567	LBP	0.00015706
ABCB4	2978.13	CREB3	1567	TFEB	0.00015706
SHC3	2975.72	TXNRD1	1567	EZR	0.000157035
PTPN1	2975.19	CX3CL1	1566	CCR8	0.000157035
VDR	2970.84	FSHB	1566	ABCG5	0.000157035
MAPKAP1	2969.98	PREX1	1566	PSMC6	0.000157011
IKBKG	2969.33	SFRP5	1566	KAT5	0.000157011
CUL1	2966.68	PSMB5	1566	COMP	0.000157011
ZFP36	2964.96	MOK	1565	PDK1	0.000156986
NAPA	2963.7	IFNA21	1565	PI4KA	0.000156986
RIPK3	2963.31	KRAS	1565	SRC	0.000156961
ATF4	2961.12	NAGPA	1564	CHRM3	0.000156961
GSTM2	2960.71	CAPN2	1564	TBL1XR1	0.000156961
CYP24A1	2959.16	DEPDC5	1563	CYP17A1	0.000156961
MAPK8	2957.5	MAML1	1563	GRP	0.000156961
POU3F1	2956.38	ALDH9A1	1563	TICAM1	0.000156961
PKN1	2956.23	PARP4	1563	SCARB1	0.000156937
JAK1	2954.31	NECTIN2	1563	ITGAL	0.000156937
PSME1	2950.83	THBS4	1563	ALDH3A2	0.000156937
CD2	2949.32	PITX2	1562	TNFSF18	0.000156937
TNFSF18	2948.22	LGR4	1562	TREH	0.000156937
F5	2946.4	GLUL	1562	FZD1	0.000156912
PIP5K1B	2946.37	PSMD8	1562	WNT5B	0.000156912
TTI1	2944.32	DDX5	1561	MEN1	0.000156912
CEL	2943.6	PIP5K1C	1561	EIF4EBP1	0.000156912
GRK2	2943.13	MT2A	1561	RPIA	0.000156912
TIGAR	2943.01	PSME1	1561	EFNA3	0.000156912
SLC44A1	2942.49	SCT	1560	EPAS1	0.000156887
CD19	2940.64	LTF	1560	IFNAR1	0.000156887
CTSC	2940.27	ABL2	1560	ROR1	0.000156887
CACNA1F	2939.36	AOX1	1560	TBX3	0.000156887
TP53INP2	2939.31	PRKACA	1560	COL9A1	0.000156887
STEAP3	2933.16	SQSTM1	1560	IL1B	0.000156887
ABCC4	2933.01	GPX7	1559	IGBP1	0.000156887
GLUL	2930.67	ARNT2	1559	SCO2	0.000156887
CKS2	2929.75	ALOX12B	1559	PDGFRA	0.000156863
CHPT1	2926.31	MRC1	1559	ESR2	0.000156863
PSMA5	2925.87	PTGER3	1559	NLGN4X	0.000156863
LOX	2925.8	HRH1	1559	TSC1	0.000156863
CLTC	2925.62	CYP39A1	1558	PFKP	0.000156863
NDUFA4L2	2923.5	ECI2	1557	PDCD1LG2	0.000156863
PSMB5	2922.89	HHAT	1557	LUM	0.000156863
SIX1	2921.94	AP3B1	1557	FGF21	0.000156863
PLAU	2921.79	ABCC4	1557	SOAT2	0.000156863
P2RY1	2919.95	KITLG	1557	STAT5B	0.000156838
WWP1	2919.35	MCU	1556	CACNA1E	0.000156838
CSNK2A2	2918.43	FABP4	1556	ORC1	0.000156838
PTGS2	2918.09	CDK1	1556	DOCK4	0.000156838
NCEH1	2917.65	TUBB4B	1555	OPTN	0.000156838
INSR	2914.9	NDUFA8	1554	MAP3K11	0.000156838
MAD2L2	2914.07	SACM1L	1554	ITGA7	0.000156838
RYR2	2913.83	CLTA	1554	RAP1A	0.000156814
FGF2	2912.89	CBS	1554	FABP4	0.000156814
IFNAR1	2912.24	CD2	1553	TLE2	0.000156814
CFI	2909.58	TNFRSF11A	1553	AOX1	0.000156789
ADCY3	2909.31	WNT4	1553	MAPKAP1	0.000156764
SLC2A3	2907.56	PLG	1553	PTPN1	0.000156764
PIK3R3	2907.4	MYLPF	1552	HADH	0.000156764
MYLIP	2905.89	NDUFS1	1552	CD44	0.000156764
NQO1	2905.68	PTPRR	1552	SLC8A1	0.000156764
BMP10	2905.21	ATP2B4	1552	CHRM5	0.000156764
APOA1	2904.36	GCNT2	1551	SLC27A6	0.000156764
SLC4A4	2902.44	MAOB	1551	PIP5K1B	0.00015674
CAPN1	2902.28	PLA2G4D	1550	CCR1	0.00015674
ADAMTS1	2901.56	TTK	1550	NFKBIA	0.00015674
ITGA1	2900.91	MYL3	1550	EYA1	0.00015674
LILRB5	2897.43	CDC7	1550	ACLY	0.00015674
CAMK1	2897.32	INPP4B	1550	PECAM1	0.00015674
CYP39A1	2896.27	CREBBP	1550	XBP1	0.00015674
EIF4E	2895.29	FZD6	1549	SLC2A3	0.00015674
IL1RAP	2894.32	GLI1	1549	SLC44A4	0.00015674
PLD1	2890.67	ATP6V0A1	1549	MCOLN1	0.00015674
TLX3	2890.25	WNT5B	1549	PSMD3	0.000156715
SLC8A1	2889.37	CBR3	1548	LAMA1	0.000156715
NTSR1	2888.76	FOXO3	1548	TUBB4B	0.000156715
MAN2B1	2887.81	VAV3	1548	ICAM1	0.000156715
GDF2	2886.04	ATG14	1547	FABP6	0.000156715
CLTA	2886.02	HERC1	1547	CACNA1H	0.000156715
HMGA2	2883.58	NEO1	1547	ATP2B4	0.000156691
ACLY	2883.54	IBSP	1547	PMAIP1	0.000156691
CFHR4	2883.49	CHRM5	1547	FARP2	0.000156666
SELPLG	2882	SLC2A6	1546	MAOB	0.000156666
CYTH3	2878.19	TNFSF18	1546	IBSP	0.000156666
LPL	2874.76	IL1B	1546	GSTA4	0.000156666
PPIP5K1	2873.68	ADRB1	1546	PMP2	0.000156666
TLE4	2873.39	SPINT1	1545	THBS3	0.000156666
ID4	2872.8	WNT1	1545	SLC4A2	0.000156666
INHBE	2871.98	MYLIP	1545	ARAP3	0.000156642
CHRM3	2871.09	ATG4A	1544	VAMP7	0.000156642
NRBF2	2870.82	ACSS2	1544	SERPINA1	0.000156617
NECTIN2	2869.72	AGPAT5	1544	EPHB1	0.000156617
CD1C	2866.3	CDK9	1544	TGIF1	0.000156617
ARF1	2865.01	PLAUR	1544	FOXG1	0.000156593
LILRB1	2864.59	SCTR	1544	MAP3K4	0.000156593
MMP3	2864.07	YWHAQ	1543	HGF	0.000156593
GCLM	2863.99	PSAP	1543	ABCC4	0.000156593
EDN1	2863.96	CYTH3	1543	RASSF1	0.000156593
GPR3	2862.76	SMPD1	1543	LPAR3	0.000156568
LDB1	2862	PTPRJ	1543	LMBRD1	0.000156568
FOXG1	2856.66	IDO1	1542	NEO1	0.000156568
HSD3B7	2855.84	CAMK2A	1541	ACADL	0.000156568
TGFB3	2855.69	HES1	1541	IFITM1	0.000156568
FRAS1	2855.52	CA5A	1540	RIPK1	0.000156544
VAMP7	2855.42	APOA1	1540	GRK3	0.000156544
COL9A1	2853.96	RAC2	1540	TNFSF10	0.000156544
MSN	2853.88	COL4A5	1540	CAPN2	0.000156544
RBPJL	2853.57	FPR1	1540	CDON	0.000156519
APOC3	2852.96	PIK3C2G	1539	ARG1	0.000156519
CAT	2852.91	CXCR5	1539	CCNH	0.000156519
SCO2	2852.32	SCUBE2	1538	ATF4	0.000156519
SCARB1	2851.4	PDK1	1538	CYP2C19	0.000156519
CD4	2850.46	LAMC2	1538	CUBN	0.000156519
CHKA	2850.34	PORCN	1537	PTGES	0.000156519
SLC44A4	2850.34	ASL	1537	PIK3CD	0.000156495
FAS	2850.24	LTC4S	1537	DDX5	0.000156495
SMPD1	2850.03	GSTA4	1537	SACM1L	0.000156495
TJP2	2848.74	NRP1	1537	CALCOCO2	0.000156495
AGPAT5	2847.12	AVPR1A	1537	PDE3B	0.000156495
TEAD4	2847.07	MYL6B	1536	CD99	0.000156495
MSTN	2846.66	SLC9A3	1536	CAPN1	0.00015647
RPS6KA5	2845.96	CYP24A1	1536	PTPRR	0.00015647
TUBB3	2845.84	CXCL2	1536	FZD10	0.00015647
SOCS2	2845.78	TSHR	1536	LTB4R2	0.00015647
APH1B	2844.59	CLU	1536	POU5F1B	0.00015647
EML4	2842.63	ADRA1D	1535	ANGPTL8	0.00015647
ALDH3A2	2842.39	CAB39	1534	CCKBR	0.000156446
LPIN1	2842.01	SLC44A1	1534	SMPD1	0.000156446
IGFBP3	2841.39	SCARB2	1534	PTPN7	0.000156446
LTF	2840.35	FABP1	1533	PSMA4	0.000156421
EIF4E2	2838.77	PDCD1LG2	1533	SLC4A4	0.000156421
THBS4	2837.16	HSP90AA1	1533	INHBE	0.000156421
HPGD	2837.04	RBPJ	1532	MAPK9	0.000156397
SLC9A1	2837.02	ACKR3	1532	MACROH2A2	0.000156397
CHMP2B	2836.72	FOXO4	1531	SCRIB	0.000156397
TICAM1	2834.66	NUMB	1531	OGDH	0.000156372
THBS3	2832.33	CYP46A1	1531	ME3	0.000156372
RHOA	2829.59	FGA	1531	TLN1	0.000156372
PRPS2	2829.02	XBP1	1530	MINPP1	0.000156372
NEO1	2827.84	PTPN7	1530	IL1R1	0.000156348
IPPK	2826.75	CRK	1530	IKBKG	0.000156348
MAPKAPK5	2826.45	CIR1	1529	NUMB	0.000156348
RBP2	2826.29	POU3F1	1529	FABP2	0.000156299
ARAF	2825.51	GCK	1528	LAMA3	0.000156274
ANK2	2825.49	PIN1	1528	RPS6KA4	0.000156274
UBE2L6	2823.13	LUM	1528	PIN1	0.00015625
CBS	2820.61	P2RX5	1527	MYL12A	0.00015625
SOAT2	2820.35	CP	1527	CYP39A1	0.000156226
C1QA	2819.25	OPTN	1527	PTPRJ	0.000156226
SERPINA1	2818.52	ARNT	1527	LMNB1	0.000156226
UBE2C	2818.41	PLAAT3	1526	PXN	0.000156201
ITGA7	2817.52	TNFSF9	1526	ABL2	0.000156201
CFHR5	2817.1	APOC3	1526	PF4V1	0.000156201
LAMA1	2817.06	PTGIS	1526	TSPOAP1	0.000156201
CYP17A1	2816.66	LAMA4	1526	MCM2	0.000156177
APOH	2816.44	DHRS11	1525	TLR3	0.000156177
EZR	2816.25	FBXW11	1525	RET	0.000156152
NDUFA4	2815.55	CFHR4	1524	PSME1	0.000156152
SMURF2	2812.68	CDKN2B	1524	EML4	0.000156128
JAM3	2810.88	RAPGEF5	1524	TBXAS1	0.000156128
LMNB1	2810.09	DOCK2	1524	ATP1B3	0.000156128
CACNB4	2809.93	CGA	1524	IL17RB	0.000156128
LATS1	2808.3	GSTO1	1523	CD40	0.000156104
PSENEN	2805.06	CLPS	1523	HOMER1	0.000156104
PLA2G6	2803.22	LILRB1	1523	PRICKLE2	0.000156104
IGF2R	2802.88	EML4	1523	MAPK10	0.000156079
ITGA8	2802.85	ICAM5	1522	LEF1	0.000156079
LMBRD1	2802.21	ARAP3	1522	PRKCB	0.000156079
EPHB1	2799.22	NCAM2	1522	MYL2	0.000156079
STAT5B	2799.08	LMNB1	1521	GPC1	0.000156079
ME3	2798.85	MAPT	1521	SOS1	0.000156055
NLGN4X	2796.81	PI4KA	1520	PCNA	0.000156055
TLN2	2794.9	MAP3K11	1520	ALOX5	0.000156055
DDIT4	2794.33	TFRC	1520	ANK2	0.000156055
GRK3	2791.61	ABHD5	1520	FOXM1	0.000156055
PLPP1	2791.5	IDS	1520	GSTT2	0.000156055
ERG	2790.7	VCL	1520	LTBR	0.000156055
CHMP1B	2790.61	LPIN1	1519	ARPC2	0.000156055
GNG11	2790.14	TRAF1	1519	BMP2K	0.000156031
CLDN15	2789.59	WWC1	1519	SEM1	0.000156031
ARAP3	2785.75	IL2RA	1519	SCTR	0.000156031
MAP3K7	2784.9	SPATA2L	1518	SLC44A1	0.000156031
TUBAL3	2784.85	TAMALIN	1518	NDUFB5	0.000156031
TFEB	2783.68	DVL1	1518	ATG16L1	0.000156006
SLC27A6	2783.22	SC5D	1518	RIPK3	0.000156006
PLA2G1B	2781.81	CALCOCO2	1517	LMNB2	0.000156006
CNTF	2781.53	UBE3A	1516	ANK1	0.000155982
RUVBL1	2779.91	GDF3	1515	CAT	0.000155958
HESX1	2778.72	FGF17	1515	PDK4	0.000155958
MAGI1	2778.5	MMP1	1515	ALOX15	0.000155958
PLA2G4F	2775.59	LIFR	1515	ITGAM	0.000155933
MEF2D	2774.68	HIPK3	1515	AP3B1	0.000155933
RIPK1	2774.25	IRAK4	1514	ATP6V0A1	0.000155933
SYNPO	2773.62	ADRM1	1514	SI	0.000155933
MYL5	2773.6	MAN2B1	1514	PKN1	0.000155933
ATP6V0A1	2772.19	ICAM1	1514	PPP2R5A	0.000155933
TBX3	2770.67	CHEK1	1514	DEGS1	0.000155933
LEF1	2770.56	CSNK1A1	1514	CEL	0.000155933
BMP2K	2768.13	COL6A2	1513	TNFSF14	0.000155933
MAP4K2	2767.25	MT-CO1	1512	PIK3C3	0.000155909
GPC1	2763.91	NAPA	1512	DOCK2	0.000155909
EYA1	2762.72	TNN	1512	TRAF1	0.000155909
ROCK2	2762.69	GRP	1512	TNFSF8	0.000155909
CDKN2B	2761.69	IL6ST	1512	IL36RN	0.000155909
TLE1	2761.35	ATP6V0A4	1511	TLX3	0.000155909
GBP2	2761.2	SESN1	1511	ARRB1	0.000155885
ITGAL	2760.85	UBE2H	1511	INHBA	0.000155885
TREH	2760.76	ASPH	1511	BID	0.000155885
SAT1	2760.31	HOMER1	1510	THBD	0.000155885
PFKP	2760.28	BMP10	1510	WNT8B	0.000155885
RELA	2759.9	CITED2	1510	CTSB	0.00015586
PIK3CD	2759.41	LTBP1	1510	INPP4B	0.00015586
FOS	2758.85	ATF4	1509	MST1	0.00015586
PPP2R5B	2758.58	SIX1	1509	CRB3	0.00015586
GP6	2758.46	GPR3	1509	DCN	0.000155836
ARG1	2757.48	SI	1508	PRKACB	0.000155836
HMGCR	2757.47	MYL2	1508	ERG	0.000155836
CUBN	2755.57	SLC39A8	1508	AXL	0.000155836
SDC3	2753.07	LRP1	1508	REL	0.000155836
MMP1	2753.07	HPGDS	1507	LPIN1	0.000155836
CDON	2752.98	FOXM1	1507	RRAGC	0.000155836
HSD17B7	2752.61	GYS2	1507	APOH	0.000155812
CCR2	2751.9	ITGA7	1507	DEFA6	0.000155812
PTAFR	2751.87	COMP	1506	PLCG1	0.000155788
CSH1	2751.16	LCN2	1505	TRAF2	0.000155788
IFITM1	2749.95	TNNC2	1505	CUL1	0.000155763
STUB1	2749.55	BAK1	1505	ADCY9	0.000155763
POU3F4	2748	ALK	1505	VAV3	0.000155763
CHMP1A	2747.42	RAB8B	1505	CITED2	0.000155763
EIF2AK3	2746.72	MMACHC	1504	SIX1	0.000155763
IL1B	2746.45	GLO1	1504	TIGAR	0.000155763
CACNB2	2744.07	HACD2	1504	WNT4	0.000155739
COX7A2L	2741.92	ETS1	1504	CSH1	0.000155739
SLC18A2	2741.86	SELPLG	1503	SRD5A1	0.000155715
RASSF1	2741.74	DDIT4	1503	VWF	0.00015569
PMAIP1	2741.42	BTRC	1503	ARAF	0.00015569
DOCK1	2740.88	AAMP	1501	SLC39A8	0.00015569
CXCL2	2738.79	PF4V1	1501	TIE1	0.00015569
MYL2	2738.32	RBPJL	1501	POU3F4	0.00015569
HTR6	2737.81	SNW1	1501	MYF5	0.00015569
RRAGD	2737.28	BID	1501	VEGFB	0.00015569
TFRC	2736.86	CLIP1	1501	RELA	0.000155642
LAMP3	2735.92	ABCG5	1500	COL4A5	0.000155642
CYP2C19	2731.41	TBKBP1	1500	CXCL2	0.000155642
LTB4R2	2731.27	CKS2	1500	CHKA	0.000155642
VPS4B	2730.41	MAML2	1500	GPC4	0.000155642
VEGFB	2728.9	ROCK2	1499	ANAPC15	0.000155642
TBC1D17	2728.83	SLC2A3	1498	VAV2	0.000155618
SRD5A1	2727.78	IGBP1	1497	APOA1	0.000155618
HOXD10	2727.59	COX6B1	1497	ABHD5	0.000155618
EP300	2723.86	NCEH1	1497	CYSLTR2	0.000155618
GFPT1	2723.72	MYL12A	1497	BDNF	0.000155618
CLDN2	2723.28	SS18	1497	GNG13	0.000155618
TNN	2722.75	PSMB9	1497	UBE2L6	0.000155618
CTNNA1	2719.06	UBE2E1	1497	PRKAA2	0.000155594
MCOLN1	2719.01	BCL2	1496	TGFB2	0.000155594
ANAPC2	2717.61	DLX5	1496	FOXO3	0.000155594
TRDN	2716.25	CD58	1496	ETS1	0.000155594
BTD	2715.85	CYSLTR2	1496	HSD3B1	0.000155594
LILRA6	2715.54	WWP2	1496	F2RL3	0.000155594
KRAS	2712.51	RUNX1T1	1496	CACNB2	0.000155569
ITGAE	2712.38	ACADL	1495	TFRC	0.000155569
MYLK	2711.94	CACNA1F	1495	CD58	0.000155569
TNFRSF11A	2711.51	CD1C	1495	CD74	0.000155569
ROR1	2709.79	TF	1495	VPS4A	0.000155569
HSD17B6	2708.53	GNAO1	1495	MMACHC	0.000155545
POU5F1B	2708.07	FABP6	1494	HSD17B6	0.000155521
SOX2	2706.71	PKN1	1494	LGR4	0.000155497
PRMT8	2705.72	IRF1	1494	HSD3B7	0.000155497
COX7A2	2704.65	FGF1	1494	CHPT1	0.000155497
INPP4B	2702.83	ATG4D	1493	KLF2	0.000155497
CASP1	2702.38	HDAC4	1493	DKK4	0.000155497
PDGFRA	2702.13	ACAT1	1493	PPP2R5B	0.000155473
CXCL14	2699.16	PSMB6	1493	CLU	0.000155448
SLC25A31	2698.99	TMSB4Y	1492	ACKR3	0.000155448
MTOR	2698.76	CYC1	1492	GCLM	0.000155448
TNFSF8	2696.05	GFPT1	1492	IDH2	0.000155448
WNT5B	2695.91	NTRK3	1492	INPP5A	0.000155448
RET	2695.71	FGFR4	1492	HERC1	0.000155424
FABP3	2695.35	GNAI3	1492	STS	0.000155424
SLC39A8	2694.87	MPO	1491	RRAGB	0.000155424
HSD17B3	2694.37	RB1	1491	FGF7	0.0001554
BAIAP3	2692.61	TP53INP2	1490	LDB1	0.0001554
WNT4	2688.01	PFKFB4	1489	FCGR1A	0.000155376
CREB3L4	2684.33	HSD3B1	1489	TUBB3	0.000155352
CLDN16	2683.22	FZD10	1489	CX3CR1	0.000155352
ARRB1	2682.99	GAB1	1489	IFNAR2	0.000155328
CCDC6	2682.16	RRAGD	1488	HMGCR	0.000155328
AGER	2680.91	CYP2C19	1488	RASGRP3	0.000155328
STX17	2680.68	SOX2	1488	SMURF2	0.000155304
SIRT1	2679.43	FGB	1488	LIPF	0.000155304
PTPN7	2675.69	PARVA	1488	ABCG1	0.00015528
TLR3	2674.77	PTGES2	1487	TKT	0.00015528
FOXO3	2673.56	GAA	1487	MAP4K2	0.00015528
CSNK1G2	2668.64	RIPK3	1487	FLT1	0.000155255
SLC25A4	2666.95	CDH19	1487	CD36	0.000155255
DHCR7	2665.5	GSTT2	1486	IFNA2	0.000155255
RNF125	2665.38	F2RL3	1486	PSMA1	0.000155183
GUSB	2664.67	MMP14	1486	C2	0.000155183
ACSBG2	2664.01	THBD	1486	MMP13	0.000155183
PRKAA2	2663.16	IL34	1485	PLA2G4F	0.000155183
PXN	2660.35	TBXAS1	1485	POU3F1	0.000155159
RASAL3	2656.05	WWP1	1484	LRP1	0.000155159
HOMER2	2655.75	DOCK1	1484	RASA3	0.000155159
PRPS1L1	2655.43	ENAH	1484	HLA-C	0.000155159
FZD1	2655.36	SFRP1	1484	CAB39L	0.000155159
SMAD3	2651.04	C2	1484	C8G	0.000155159
ORC6	2650.36	PRICKLE2	1483	LPAR1	0.000155135
CD59	2648.55	RHOQ	1483	MAPKAPK2	0.000155135
PDE3B	2648.37	ATP6V1G2	1482	RAB8B	0.000155135
IDH1	2648.19	SLC17A5	1482	CYP11B1	0.000155135
IFNA2	2648.13	SLC5A6	1482	VSIR	0.000155135
PRKCB	2647.89	IL17C	1482	FTH1	0.000155135
CALCOCO2	2647.63	HMGCR	1482	LAMC2	0.000155111
VAV3	2646.64	CSNK1G2	1482	S100A8	0.000155111
ANGPTL8	2644.3	BMP7	1482	TNC	0.000155087
ANK1	2644.26	LTB4R2	1481	MAGI1	0.000155087
MYL12A	2644.19	HOXD10	1481	ASPH	0.000155087
LLGL2	2643.43	HSD17B6	1481	FGB	0.000155087
OSMR	2642.24	PPP2R5A	1481	HSD17B3	0.000155087
CCR8	2640.91	ESRRB	1481	CNTF	0.000155087
IL36RN	2639.28	HIPK1	1481	PGK2	0.000155087
CACNA1H	2637.9	GNA13	1481	GRM2	0.000155063
MYF5	2635.13	MDM4	1480	RAC2	0.000155063
ATG101	2634.46	TIE1	1480	GAD1	0.000155063
NDUFB3	2633.03	PTGDS	1479	PSAPL1	0.000155063
NDUFS6	2631.89	MYL4	1479	TRDN	0.000155039
ABHD5	2631.77	GCLM	1479	NCAM2	0.000155039
TNFSF10	2630.3	TEAD4	1479	LTBP1	0.000155039
VCP	2628.96	RASSF1	1479	PAX7	0.000155039
SS18	2628.63	LAMP3	1479	MSTN	0.000155039
SPTAN1	2625.9	GNG7	1479	MAPK8	0.000155015
IP6K3	2624.74	CD74	1479	DAAM1	0.000155015
VAV2	2621.67	PSMD1	1479	HACD2	0.000155015
ARHGEF12	2621.37	DGAT1	1478	AGER	0.000155015
MTMR3	2620.74	NQO1	1478	PDP1	0.000155015
CDK9	2620.33	GDF2	1478	CSNK2A2	0.000154991
ERBB2	2619.19	SCO2	1478	MPO	0.000154991
SOCS7	2618.03	MTMR3	1478	CTSW	0.000154991
GNG13	2617.92	DEGS1	1478	AGPAT1	0.000154991
PKM	2617.72	TRAF3	1478	PTK2	0.000154967
NDUFA10	2614.86	GPC1	1477	ETV5	0.000154967
GLRX2	2614.7	IDH2	1477	DEFA4	0.000154967
ALOX5	2613.54	NDUFB5	1476	JAG2	0.000154967
GSTT1	2612.36	MEF2A	1476	ERBB2	0.000154943
REL	2611.55	NDUFAB1	1475	CYC1	0.000154943
NECTIN4	2611.36	CFHR5	1475	DIABLO	0.000154943
DIRAS2	2611.26	IDH1	1475	CCDC6	0.000154943
CP	2611.09	HSPA5	1475	HES1	0.000154919
HACD2	2610.84	PTPRC	1475	LPAR2	0.000154919
PLAUR	2610.18	M6PR	1474	MECR	0.000154919
UBE2H	2609.39	CD19	1474	SLC22A8	0.000154919
SNW1	2609.11	PRPS2	1474	TTK	0.000154895
MTM1	2608.08	CD86	1474	CDH19	0.000154895
FOXO1	2607.97	FUCA1	1473	MMP14	0.000154895
PGK2	2605.4	WDFY3	1473	DIRAS3	0.000154895
FADD	2605.39	PDK4	1473	PLA2G6	0.000154895
NDUFB4	2604.85	NOX5	1473	DHCR7	0.000154895
FGF21	2602.9	CLDN4	1472	CGA	0.000154871
TSHR	2600.62	LBP	1472	ECI1	0.000154871
RASA2	2595.94	SMURF1	1472	VCP	0.000154847
ALDH18A1	2595.63	PTPN11	1471	UBE2H	0.000154847
MAP1LC3A	2594.75	RASA3	1470	EGLN1	0.000154847
ABL2	2594.13	UBE2C	1470	SLCO1C1	0.000154847
RBKS	2593.26	LPAR2	1470	TUBAL3	0.000154847
MAOB	2593.07	PRKAG2	1470	TNFRSF11B	0.000154847
MAML2	2592.36	UBE2S	1469	CTBP2	0.000154823
HSD17B8	2591.58	CEL	1469	CKS2	0.000154823
WNT8B	2591.25	RRAGC	1469	PRPS2	0.000154823
HERC2	2590.21	GNA11	1469	MYO1C	0.000154823
MRC1	2589.48	CDH4	1469	ACSBG2	0.000154823
IBSP	2589.23	EGR1	1469	SLC19A3	0.000154823
ATP1B3	2588.33	ITGB3	1469	HSP90AB1	0.000154799
CAB39L	2587.94	DEFA5	1468	SQSTM1	0.000154799
PTPRJ	2587.53	RPS6KA4	1468	IDH1	0.000154799
PIAS3	2587.45	ATP1B3	1468	ABCC1	0.000154799
ATP5PO	2587.13	SOAT1	1468	C1QC	0.000154799
ACAT1	2585.04	PMP2	1467	HRH1	0.000154775
OPTN	2583.91	CCL5	1467	SFRP1	0.000154775
DEGS1	2583.74	GRIN2B	1467	BNIP3L	0.000154775
TLR9	2580.51	CCL24	1466	OSM	0.000154775
MAPKAPK2	2580.15	PLA2G15	1466	TERT	0.000154775
EFNA4	2577.02	SLC27A6	1466	SHC1	0.000154751
SC5D	2576.73	PATJ	1466	LLGL2	0.000154751
PSMB6	2576.13	GREM2	1466	HOMER2	0.000154751
ALOX15	2575.12	TM7SF2	1465	IDS	0.000154727
SMARCAD1	2573.7	HSD3B7	1465	VCL	0.000154727
TGIF1	2572.8	STUB1	1465	WWC1	0.000154727
AOX1	2570.37	EIF2AK3	1465	EIF2AK3	0.000154727
WIPI1	2569.15	VPS4B	1465	DDAH1	0.000154727
PSMB9	2567.35	SLC44A4	1464	BAIAP3	0.000154727
TCF7	2567.26	PMAIP1	1464	ADRB1	0.000154703
NTRK3	2567.07	PRMT8	1464	FGA	0.000154703
LPAR3	2566.38	NFATC1	1464	ESRRB	0.000154703
LUM	2566.32	ITGB8	1464	APBB1IP	0.000154703
LAMA3	2565.6	FCER1A	1464	TAP1	0.000154703
TAP1	2565.6	SLC25A4	1463	PSENEN	0.000154703
ACAT2	2565.13	ADH1B	1463	CXCR5	0.000154679
RAPGEF5	2563.55	HLA-E	1463	SCARB2	0.000154679
PLA2G12A	2563.37	VHL	1462	GREM2	0.000154679
TRAF6	2563.13	LILRA6	1462	VPS4B	0.000154679
CCKBR	2562.75	ATM	1462	LRP2	0.000154679
GRP	2559.86	CNR1	1462	GSTM2	0.000154679
MAP2K5	2559.15	TNFSF8	1461	AGPAT5	0.000154655
LBP	2554.29	ADRA1A	1461	DTX1	0.000154655
ITGA9	2554.04	TICAM1	1460	CXCL14	0.000154655
HGF	2553.71	DLG1	1460	C1QB	0.000154655
PDHB	2550.32	MAD2L1	1460	SLCO1B3	0.000154655
CD40	2549.82	MEN1	1459	MAP1LC3B	0.000154655
IDH2	2549.19	ARF1	1458	ATG101	0.000154655
BID	2548.38	PDHB	1458	LFNG	0.000154655
HOXA10	2546.28	CH25H	1458	RBPJ	0.000154631
CSNK2A1	2543.65	LTBR	1458	ALK	0.000154631
PPP2R5A	2543.45	ARPC2	1458	CD86	0.000154631
ATP2B4	2542.63	PPP2R2B	1458	SOAT1	0.000154631
PSAPL1	2541.97	GNAL	1458	FZD5	0.000154631
MDM4	2539.98	PRCC	1457	DUSP2	0.000154607
IL13RA1	2539.64	INSRR	1457	MAP3K7	0.000154583
NFKBIA	2539.53	GNAS	1457	ERC1	0.000154583
COMP	2539.34	TLE2	1456	S100A7	0.000154583
SCTR	2538.79	HLA-C	1456	YWHAQ	0.00015456
PTK2	2538.74	GAD1	1456	STUB1	0.00015456
DTX1	2537.67	ABCG1	1456	GP6	0.00015456
BRCA2	2536.9	BMPR2	1456	CDKN2D	0.00015456
SAT2	2536.55	THSD4	1456	HKDC1	0.00015456
MAPT	2535.89	PPP2CB	1455	CLN3	0.00015456
INSRR	2534.19	AK5	1454	TBC1D17	0.00015456
PLCD4	2529.07	SOCS7	1453	PRPS1L1	0.00015456
EPAS1	2528.47	PKM	1453	WWP1	0.000154536
ICAM1	2523.66	BDNF	1453	KCNK3	0.000154536
LDHC	2523.17	TUBA8	1452	MAD2L2	0.000154536
CCR1	2522.2	EGLN1	1452	ALDH18A1	0.000154536
NOTCH2	2522.12	ANGPT4	1451	P2RX3	0.000154536
CBLC	2521.76	VAMP7	1451	PRMT8	0.000154512
CH25H	2521.52	PPP2R5C	1451	TRAM2	0.000154512
LTBR	2519.42	DDAH1	1451	MTM1	0.000154512
ARNT	2517.73	RASGRP3	1451	MLKL	0.000154512
TLN1	2516.73	MMP13	1451	SNAP25	0.000154488
PAX7	2515.8	UBE2D1	1451	RAPGEF5	0.000154488
PTEN	2514.93	ALOX15	1450	BTD	0.000154488
AGPAT1	2514.58	TRAM2	1450	HMGB1	0.000154464
NAGA	2513.44	E2F4	1450	RPS6KA5	0.000154464
DAAM1	2509.88	MECR	1449	TSHR	0.000154464
LPAR1	2509.45	IL1RL2	1449	IRF1	0.000154464
HSD3B1	2507.62	INHBE	1449	HDAC4	0.000154464
PSMD8	2507.38	CUBN	1449	APOC1	0.000154464
IL17RB	2507.26	LIPF	1449	CALML5	0.000154464
CD58	2505.74	CCND3	1449	TRAF6	0.00015444
DOCK2	2505.56	ATP6V1A	1449	MYL5	0.00015444
HPSE	2503.32	BNIP3L	1448	ALOX15B	0.00015444
HYAL3	2501.85	SNAP23	1448	PTEN	0.000154416
GRM2	2501.83	MINPP1	1447	CDC7	0.000154416
ADRA1D	2501.61	FABP2	1447	PSMB9	0.000154416
DUSP2	2499.47	DIABLO	1447	MTMR3	0.000154416
TGFB2	2499.18	DTX1	1447	FADD	0.000154416
TIE1	2498.55	NRBF2	1446	ADAP1	0.000154416
PRKACA	2498.41	THBS3	1446	ATP5F1A	0.000154392
TKT	2497.56	TGIF1	1446	SLC25A4	0.000154392
TERT	2496.81	WAS	1446	STC1	0.000154392
FGA	2495.77	SPTAN1	1445	HOXA10	0.000154392
UQCRQ	2495.73	MTM1	1445	LITAF	0.000154392
SNAP25	2495.7	CHKA	1444	CYP4F8	0.000154392
CHRM5	2494.86	CACNA1H	1444	PRKAG2	0.000154369
CITED2	2488.76	GNG13	1444	CYP1B1	0.000154369
RRAGC	2488.22	FADD	1444	LCP2	0.000154345
ADCY9	2485.83	RBX1	1444	EDNRA	0.000154345
FZD10	2485.39	NEGR1	1444	IL2RA	0.000154345
DOCK4	2484.56	GUCY1A2	1444	WT1	0.000154345
BAX	2484.49	PDE3B	1443	MAP2K5	0.000154321
PRKAB2	2483.45	FGF21	1443	NOX5	0.000154321
ACADSB	2483.23	BAX	1443	FCER1A	0.000154321
ACSL3	2483.18	S100A8	1443	CCND3	0.000154321
KITLG	2483.02	GPC4	1443	IPPK	0.000154321
NCAM2	2481.33	APBB1IP	1443	MT-ND6	0.000154321
INPP5E	2480.87	EIF4EBP1	1442	MTOR	0.000154297
STK3	2480.4	LMNB2	1441	RUVBL1	0.000154297
BNIP3L	2479.91	COX5A	1441	CTLA4	0.000154297
PFKFB1	2478.73	RUVBL1	1441	GUCY1A1	0.000154297
MGAM2	2478.16	FZD5	1440	PSMB5	0.000154273
CASP8	2477.04	PIAS1	1440	LIFR	0.000154273
MAPK12	2475.14	ETV5	1440	SS18	0.000154273
FBXW11	2472.77	PPP2R5B	1438	ITGAE	0.000154273
FGFR4	2472.43	AMBRA1	1437	SORT1	0.000154273
MPO	2470.8	SIRT1	1437	EFNA4	0.000154273
RBX1	2470.72	AQP4	1437	PTGER3	0.00015425
WDFY3	2469.98	CHPT1	1436	SERPINE1	0.00015425
INPP5F	2469.12	PNPLA2	1435	ETS2	0.00015425
TRAF1	2467.09	MAPK12	1435	IL25	0.00015425
TBXAS1	2466.08	CXCR3	1435	MAML2	0.000154226
ETS1	2466	ACSL3	1434	WDFY3	0.000154226
UBA3	2463.62	EFNA5	1434	MAPKAPK5	0.000154226
PDCD4	2461.76	BMP6	1433	IL18RAP	0.000154226
ESRRB	2461.41	MACROH2A2	1432	KITLG	0.000154202
NDUFS3	2461.09	SOAT2	1431	GNA11	0.000154202
JMJD8	2459.92	POU3F4	1431	SMAD9	0.000154202
LIPF	2458.73	WIPI1	1431	HSPA6	0.000154202
CYSLTR2	2455.34	PHKB	1431	NAGA	0.000154202
SMURF1	2453.97	SUPT3H	1431	CLTA	0.000154178
PAK2	2453.36	SERPINE1	1431	GNGT1	0.000154178
PECAM1	2453.32	FGFR3	1430	SLC18A2	0.000154178
PHKA2	2452.31	RARA	1430	CLDN3	0.000154178
RASAL1	2452.27	SLC4A2	1429	PSMA5	0.000154154
TNFSF14	2452.06	AGER	1429	DEPTOR	0.000154154
PRXL2B	2451.78	MYF5	1429	PLA2G4C	0.000154154
GRHPR	2451.18	CDC42	1429	EP300	0.000154131
CYP4F8	2449.59	ADCY2	1429	ARHGEF12	0.000154131
BTRC	2449.42	NDUFA4L2	1428	SC5D	0.000154131
ALK	2448.5	CXCL14	1428	TF	0.000154131
MAPK8IP2	2447.94	ENPP1	1428	FGFR4	0.000154131
UBE2E1	2447.82	DIRAS2	1427	BEST1	0.000154131
RAC2	2447.58	ATP5PO	1427	CASP8	0.000154107
CDC42	2445.65	TKT	1427	TCF7	0.000154107
S100A8	2445.18	ERC1	1427	COL6A2	0.000154083
CAMK2A	2444.91	WEE1	1427	NTRK3	0.000154083
SLC22A8	2444.88	BMP5	1427	PRKAB2	0.000154083
CTSB	2443.9	RPIA	1426	AP3B2	0.000154083
AXL	2443.6	HSD17B3	1426	CFL1	0.000154083
PPIP5K2	2442.86	CYP11B1	1426	CLTC	0.000154059
ITGAM	2442.57	NCOA3	1426	WAS	0.000154059
BCL11B	2441.78	GNGT1	1425	TPM3	0.000154059
DCN	2440.42	BCR	1425	AIRE	0.000154059
CD99	2439.28	STC1	1425	NRP1	0.000154036
LIFR	2439.04	IKBKB	1425	WWP2	0.000154036
HSP90AA1	2438.77	ITGB2	1425	VHL	0.000154036
CCL4	2438.63	ANAPC15	1424	THSD4	0.000154036
HIPK3	2438.17	STS	1424	BMP5	0.000154036
CACNG7	2437.38	IL16	1424	NR1H4	0.000154036
PPP3R1	2436.86	ATP2A2	1424	ME2	0.000154036
ARPC2	2434.65	SCRIB	1423	MAPK12	0.000154012
SCARB2	2434.37	TUBB3	1423	TNFSF15	0.000154012
BDNF	2433.06	PLPP1	1423	ADCY4	0.000154012
NEGR1	2431.27	TAP1	1423	ACAA1	0.000154012
ENAH	2431.19	DEFA6	1422	CYTH1	0.000154012
PIP4P1	2430.77	UBE2L6	1422	CLIP1	0.000153988
FBXO25	2427.07	MYO1C	1422	ROCK2	0.000153988
CFL1	2426.43	STX17	1421	SOCS7	0.000153988
WWP2	2425.09	MST1	1420	FLOT2	0.000153988
INHBA	2424.2	HUWE1	1420	PSMD8	0.000153965
DKK4	2424.18	MAPK11	1420	PRKACA	0.000153965
CD47	2423.34	CYP3A5	1420	NDUFA8	0.000153965
COL4A5	2422.78	CYP1B1	1420	GDF15	0.000153965
GNAI3	2422.61	FGFR1	1420	HPSE	0.000153965
FIS1	2422.21	IFITM1	1419	KLF3	0.000153965
FGB	2419.29	CCDC6	1418	CDK9	0.000153941
HIPK1	2419.21	RALA	1418	SOX2	0.000153941
CAPN2	2417.8	ITGB5	1418	AK5	0.000153941
PDK4	2415.95	CSH1	1417	LRP5	0.000153941
CASP6	2414.76	GCLC	1417	ZIC3	0.000153941
SOAT1	2413.09	DEPTOR	1417	NOX3	0.000153941
PPP2R5C	2409.39	SKP2	1416	SLC25A31	0.000153941
UBE3A	2409.38	TRIM32	1416	STING1	0.000153941
ACAA1	2408.98	KCNK3	1415	ACAT1	0.000153917
ERC1	2408.29	SRD5A1	1414	CDH4	0.000153917
JAG2	2407.07	IL17RB	1414	TIMP3	0.000153917
LPAR2	2404.91	UBA1	1414	MT-ND2	0.000153917
MLST8	2404.07	LRP2	1414	IFNW1	0.000153917
PDP1	2403.65	ETS2	1414	HIPK3	0.000153894
OSM	2402.32	TFEB	1413	SLCO1B1	0.000153894
LRP5	2400.93	ZEB1	1413	PIAS3	0.000153894
HES1	2399.22	WNT8B	1412	PARP3	0.000153894
WDR59	2399.04	ATP6V1H	1412	UBE2C	0.00015387
GCLC	2398.77	KLF2	1412	COX6B1	0.000153846
FANCL	2396.11	PTPRF	1412	GNA13	0.000153846
IFNAR2	2395.9	MAP4K2	1411	GNG7	0.000153846
NDUFV1	2395.53	PTGES	1411	LAPTM4B	0.000153846
NOX5	2394.92	MAPKAPK5	1410	CSNK2A1	0.000153822
ELOA	2394.17	CD47	1410	PTGIS	0.000153822
SFRP1	2393.9	PPP1R12B	1410	FGF1	0.000153822
CALML5	2393.09	STK3	1409	ITGB8	0.000153822
EGLN1	2391.82	C1QB	1409	DNASE2B	0.000153822
HUWE1	2391.76	PKN2	1409	NECTIN4	0.000153822
WHAMM	2391.61	MYL9	1409	PAK2	0.000153799
P2RX3	2389.91	MAD2L2	1407	RHOQ	0.000153799
TUBA1B	2387.6	MCOLN1	1407	CSNK1G2	0.000153799
SKP2	2385.16	HOXA10	1407	HLA-E	0.000153799
FLT1	2384.23	TPM3	1407	TMPRSS2	0.000153799
UQCRC2	2381.98	FGF4	1407	MTMR14	0.000153799
FCGR1A	2380.61	APOA2	1407	LDHC	0.000153799
CXCR5	2379.98	CHRM4	1407	MAPT	0.000153775
SPHK2	2379.76	SLCO1B3	1406	ENAH	0.000153775
SLCO1B3	2379.74	E2F3	1406	SIRT1	0.000153775
TRAF5	2379.72	CDC6	1406	DIRAS2	0.000153775
SLCO1C1	2379.46	SOCS1	1406	FGF4	0.000153775
SNAP23	2379.05	IP6K3	1405	COQ10A	0.000153775
PATJ	2379.02	CAB39L	1405	RBKS	0.000153775
SIRT6	2378.48	E2F1	1405	PLG	0.000153752
PLA2G2E	2377.71	MAP3K2	1404	FPR1	0.000153752
TRAM2	2376.96	TOLLIP	1404	NFATC1	0.000153752
PHKB	2376.94	CFTR	1403	TFPI	0.000153752
SQSTM1	2376.88	CCR2	1403	INPP5F	0.000153752
CHMP4C	2376.27	IL36RN	1403	P2RX7	0.000153752
UBA1	2374.18	BTD	1402	LIMK2	0.000153728
CLN3	2373.73	F2RL2	1402	HIPK1	0.000153704
SUPT3H	2372.48	CX3CR1	1401	MEF2A	0.000153704
[truncated: 1,877 more rows]

## Sheet: Sheet2
TMSB4X	thymosin beta 4, X-linked [Source:HGNC Symbol;Acc:HGNC:11881]
UBB	ubiquitin B [Source:HGNC Symbol;Acc:HGNC:12463]
BMP4	bone morphogenetic protein 4 [Source:HGNC Symbol;Acc:HGNC:1071]
ENO2	enolase 2 [Source:HGNC Symbol;Acc:HGNC:3353]
RAC1	ras-related C3 botulinum toxin substrate 1 (rho family, small GTP binding protein Rac1) [Source:HGNC Symbol;Acc:HGNC:9801]
UBC	ubiquitin C [Source:HGNC Symbol;Acc:HGNC:12468]
FMOD	fibromodulin [Source:HGNC Symbol;Acc:HGNC:3774]
RPE	ribulose-5-phosphate-3-epimerase [Source:HGNC Symbol;Acc:HGNC:10293]
CDH3	cadherin 3 [Source:HGNC Symbol;Acc:HGNC:1762]
PLA2G2D	phospholipase A2 group IID [Source:HGNC Symbol;Acc:HGNC:9033]
UVRAG	UV radiation resistance associated [Source:HGNC Symbol;Acc:HGNC:12640]
DRD5	dopamine receptor D5 [Source:HGNC Symbol;Acc:HGNC:3026]
CLIC1	chloride intracellular channel 1 [Source:HGNC Symbol;Acc:HGNC:2062]
DEFA5	defensin alpha 5 [Source:HGNC Symbol;Acc:HGNC:2764]
UQCRH	ubiquinol-cytochrome c reductase hinge protein [Source:HGNC Symbol;Acc:HGNC:12590]
TUBA1A	tubulin alpha 1a [Source:HGNC Symbol;Acc:HGNC:20766]
TCF7L1	transcription factor 7 like 1 [Source:HGNC Symbol;Acc:HGNC:11640]
ADCY6	adenylate cyclase 6 [Source:HGNC Symbol;Acc:HGNC:237]
CLDN10	claudin 10 [Source:HGNC Symbol;Acc:HGNC:2033]
PLD2	phospholipase D2 [Source:HGNC Symbol;Acc:HGNC:9068]
YWHAE	tyrosine 3-monooxygenase/tryptophan 5-monooxygenase activation protein epsilon [Source:HGNC Symbol;Acc:HGNC:12851]
PIK3R1	phosphoinositide-3-kinase regulatory subunit 1 [Source:HGNC Symbol;Acc:HGNC:8979]
CTNNB1	catenin beta 1 [Source:HGNC Symbol;Acc:HGNC:2514]
MAPK3	mitogen-activated protein kinase 3 [Source:HGNC Symbol;Acc:HGNC:6877]
EGFR	epidermal growth factor receptor [Source:HGNC Symbol;Acc:HGNC:3236]
MYC	v-myc avian myelocytomatosis viral oncogene homolog [Source:HGNC Symbol;Acc:HGNC:7553]
NFKB1	nuclear factor kappa B subunit 1 [Source:HGNC Symbol;Acc:HGNC:7794]
PPARG	peroxisome proliferator activated receptor gamma [Source:HGNC Symbol;Acc:HGNC:9236]
PRKCQ	protein kinase C theta [Source:HGNC Symbol;Acc:HGNC:9410]
PRL	prolactin [Source:HGNC Symbol;Acc:HGNC:9445]
CDKN1A	cyclin dependent kinase inhibitor 1A [Source:HGNC Symbol;Acc:HGNC:1784]
ITPKC	inositol-trisphosphate 3-kinase C [Source:HGNC Symbol;Acc:HGNC:14897]
EDAR	ectodysplasin A receptor [Source:HGNC Symbol;Acc:HGNC:2895]
ATP12A	ATPase H+/K+ transporting non-gastric alpha2 subunit [Source:HGNC Symbol;Acc:HGNC:13816]
PIM1	Pim-1 proto-oncogene, serine/threonine kinase [Source:HGNC Symbol;Acc:HGNC:8986]
