# Supplementary material for: Integrating Multi-Omics Analysis for Enhanced Diagnosis and Treatment of Glioblastoma: A Comprehensive Data-Driven Approach
Source: Preprints.org preprint supplement (doi:10.20944/preprints202303.0355.v1), 2023-03-20
Supplement: Supplementary file 27 [file Supplementary Table 9.xlsx]

## Sheet: Sheet1
MUST	DIAMOND	Glio-PPI	Signal -PPI	109 common elements in "MUST" and "DIAMOND":	4 common elements in "glio-ppi" and "signal-ppi":	3 common elements in "glio-ppi", "signal-ppi", "MUST" and "DIAMOND":
EGFR	MCM3	UBC	TMSB4X	EGFR	UBC	EGFR
NOTCH2	MCM4	APP	UBB	NOTCH2	EGFR	CTNNB1
NOTCH1	MCM5	FN1	BMP4	NOTCH1	CTNNB1	PIK3R1
JAG2	SMARCA2	KCNIP4	ENO2	JAG2	PIK3R1
JAG1	MCM6	AUTS2	RAC1	JAG1
RUNX3	SMARCA4	CAST	UBC	RUNX3
VEGFA	KMT2A	NTRK2	FMOD	VEGFA
PDGFRA	MCM7	CELF2	RPE	PDGFRA
PIK3CA	CBX4	CDH13	CDH3	PIK3CA
PIK3R1	SMARCC1	DAB1	PLA2G2D	PIK3R1
PROM1	BCHE	RBFOX1	UVRAG	PROM1
IFNAR1	MCM2	RDX	DRD5	IFNA2
IFNA2	XRCC6	NFIA	CLIC1	MET
MET	CCND1	EGFR	DEFA5	PTK2
PTK2	GDNF	FOXP1	UQCRH	APC
APC	MYC	MUC1	TUBA1A	HEY1
HEY1	CDC42BPG	TCF4	TCF7L1	ERBB2
ERBB2	ATAD2	NFIB	ADCY6	RECK
RECK	PRMT5	PPP3CA	CLDN10	GSTT1
GSTT1	RBBP7	DAPK1	PLD2	EGF
EGF	RBL1	SMIM10L2A	YWHAE	RPS6KA3
RPS6KA3	FOXO3	ZFP57	PIK3R1	NF1
NF1	MMS22L	UGT2B17	CTNNB1	PRKCB
PRKCB	HIF1A	TDRP	MAPK3	GUCY2F
GABARAPL2	PDGFRA	IL31	EGFR	PRKN
GUCY2F	LTBP4	UGT8	MYC	CDC42BPG
PRKN	H3C14	MRPL23	NFKB1	PRKCA
RAC1	PINK1	COX6B2	PPARG	HSPB8
CDC42BPG	CHD3	XRRA1	PRKCQ	CD9
PRKCA	AR	UGT2B15	PRL	CTSB
HSPB8	NOTCH1	RPL41	CDKN1A	CSTA
CD9	SETDB1	CMTM1	ITPKC	IDH1
CTSB	SUPT16H	KCNK18	EDAR	IDH2
CSTA	UBE2I	UGT1A8	ATP12A	CDK3
IDH1	NOTCH2	UBAP1L	PIM1	CDK2
IDH2	NOTCH3	PLK5		TES
CDK3	INSRR	DNAH1		MGMT
CDK2	CHD4	UGT1A10		MYC
TES	CD9	SPSB4		NOTCH3
MGMT	MDM4	IL27		HES1
MYC	BHLHE40	LUZP6		STAG2
NOTCH3	PDK2	PLXDC2		PIM1
HES1	NSD2	IQGAP2		BRD4
STAG2	RECK	JUN		FOSL2
PIM1	H3C15	CTNNB1		BRD2
BRD4	UHRF1	PIK3R1		CDK6
FOSL2	KDM1A	XPO1		H2AX
BRD2	MDM2	SETBP1		IL1B
CDK6	IDH1			HIF1A
H2AX	PRMT7			MAPK8
IL1B	CHI3L1			PDK2
HIF1A	TRIB3			AKT1
MAPK8	CSTB			IRAK1
PDK2	CSTA			PINK1
AKT1	IRAK1			LZTR1
IRAK1	POLK			PRKD3
PINK1	GATAD2A			TNFSF10
LZTR1	IDH2			NLK
RUVBL1	NPM1			TAF1L
PRKD3	PIK3R1			SIK1
GSK3A	RELA			FAT1
TNFSF10	DYRK2			EZH2
CFLAR	PIK3CA			BHLHE40
NLK	PIM1			H3-3A
SHANK2	PARP1			POLK
TAF1L	PTEN			ZBTB7A
TAF9	KAT5			NCOR1
SIK1	COPRS			CTSK
MAP3K7	FN1			STYK1
FAT1	STYK1			AKT3
EZH2	BAZ1A			CTNNB1
BHLHE40	ORC2			CTNND2
H3-3A	HSPA4			RUNX1
POLK	CUL4A			IL2
ZBTB7A	LZTR1			STKLD1
NCOR1	H2AC4			CHI3L1
CTSK	HSP90AA1			DUSP6
ARID4B	CDK6			PML
GSK3B	IFNA2			TERT
STYK1	PELP1			DYRK2
AKT3	CDK3			DAXX
CTNNB1	CDK2			MDM4
CTNND2	IL2			GDNF
RUNX1	STAG2			HSP90AA1
IL2	CTNNB1			INSRR
PSMC3	IL1B			EPHB6
STKLD1	NF1			MMP2
HSPA8	CHAF1B			MMP9
CHI3L1	KAT7			CXCL8
MAPK3	DEK			FN1
DUSP6	RNF2			TGM2
PML	TERT			TRIB3
TERT	BRD2			LTBP4
DYRK2	MACROH2A1			BCHE
DAXX	SMARCA5			SUZ12
MDM4	PHF8			MTOR
MKLN1	BRD7			PTEN
GDNF	PRKN			NDRG1
HSP90AA1	WT1			WT1
INSRR	SUV39H1			H3C1
SMAD2	HSP90AB1			H3C2
EPHB6	HOXA9			CSTB
MMP2	CHUK			TRIM33
MMP9	CBX7			SRPK2
CXCL8	CREBBP			BMI1
FN1	FOSL2			ATRX
TGM2	MTOR			ERN1
TRIB3	MYOD1			MAPKAPK3
LTBP4	H2AC20			SEPTIN14
DIAPH3	H4-16
BCHE	PTK2
SUZ12	HPF1
MTOR	H3C11
PTEN	H3C8
NDRG1	SIRT2
WT1	H3C3
H3C1	H3C6
H3C2	H3C2
CSTB	H4C1
TRIM33	H3C12
SRPK2	H3C10
BMI1	CBX6
ATRX	H3C1
ERN1	CBX5
MAPKAPK3	H3C4
CDC42EP4	KDM4A
SEPTIN14	KAT14
	STKLD1
	SFMBT1
	EGF
	KAT8
	ZBTB7A
	H2BC12
	CXCL8
	HEY1
	H2BC21
	TRIM28
	NDRG1
	PHF20L1
	RACK1
	CHAF1A
	EGFR
	CBX1
	H4C8
	H4C2
	TOP2A
	H4C11
	RAD51B
	H4C3
	TP53BP1
	TP53
	H4C5
	ANP32A
	H4C13
	BRD4
	JAG1
	H4C6
	H4C12
	H4C4
	PHF20
	GATAD2B
	RUNX1
	TRIM33
	CDK1
	CBX8
	H4C15
	RUNX3
	SRPK2
	TONSL
	MMP2
	NASP
	DUSP6
	MMP9
	RPS6KA3
	TAF1
	PRKD3
	EP300
	TP73
	H4C14
	NOC2L
	CENPA
	EZH2
	RAG1
	EHMT1
	HDAC6
	MECP2
	MTA2
	ASF1B
	DYRK1A
	DAXX
	HDAC5
	SSRP1
	TRIM24
	MTA1
	MEN1
	NSD1
	TAF15
	H2AC8
	TWIST1
	UHRF2
	HIRA
	TGM2
	MSL3
	H1-5
	CTNND2
	L3MBTL2
	GSTT1
	H1-2
	BMI1
	CTSB
	BRPF1
	MET
	STAT3
	H1-1
	FANCD2
	TES
	ASF1A
	H3-3B
	H3-3A
	EPHB6
	CCNA2
	CTSK
	H2BC3
	SHPRH
	IPO4
	H2AX
	CCNE1
	L3MBTL1
	HDAC8
	PKM
	LBR
	NLK
	TAF1B
	SEPTIN14
	TAF1A
	LMNA
	KAT6A
	PROM1
	HDAC3
	PBRM1
	PRMT1
	BPTF
	ERBB2
	EHMT2
	RPS6KA5
	CBX2
	ATRX
	AKT3
	MAPKAPK3
	SET
	CBX3
	TAF1L
	XPC
	HES1
	KAT2B
	XRCC5
	MGMT
	H3-4
	FAT1
	ERCC6
	H4C9
	BRCA1
	GUCY2F
	HSPB8
	KMT5A
	PRKCA
	H3C7
	EED
	PRKCB
	JAG2
	PRKDC
	ERN1
	SIK1
	PCNA
	TNFSF10
	YWHAZ
	SIRT1
	DNMT3A
	DNMT1
	APC
	PARP10
	AKT1
	JUN
	VEGFA
	HDGF
	ESR1
	HDAC2
	EID1
	HDAC1
	H3C13
	KMT5C
	MAPK8
	KAT2A
	PML
	WDR5
	COMMD3-BMI1
	HAT1
	NCOR1
	SUZ12
	ARID4A
	RBBP4
	ING2
	SETD7
	NSD3
	RB1

## Sheet: Sheet2
must-diamond-glio-signal
EGFR	epidermal growth factor receptor [Source:HGNC Symbol;Acc:HGNC:3236]
NOTCH2	notch 2 [Source:HGNC Symbol;Acc:HGNC:7882]
NOTCH1	notch 1 [Source:HGNC Symbol;Acc:HGNC:7881]
JAG2	jagged 2 [Source:HGNC Symbol;Acc:HGNC:6189]
JAG1	jagged 1 [Source:HGNC Symbol;Acc:HGNC:6188]
RUNX3	runt related transcription factor 3 [Source:HGNC Symbol;Acc:HGNC:10473]
VEGFA	vascular endothelial growth factor A [Source:HGNC Symbol;Acc:HGNC:12680]
PDGFRA	platelet derived growth factor receptor alpha [Source:HGNC Symbol;Acc:HGNC:8803]
PIK3CA	phosphatidylinositol-4,5-bisphosphate 3-kinase catalytic subunit alpha [Source:HGNC Symbol;Acc:HGNC:8975]
PIK3R1	phosphoinositide-3-kinase regulatory subunit 1 [Source:HGNC Symbol;Acc:HGNC:8979]
PROM1	prominin 1 [Source:HGNC Symbol;Acc:HGNC:9454]
IFNAR1	interferon alpha and beta receptor subunit 1 [Source:HGNC Symbol;Acc:HGNC:5432]
IFNA2	interferon, alpha 2 [Source:HGNC Symbol;Acc:HGNC:5423]
MET	MET proto-oncogene, receptor tyrosine kinase [Source:HGNC Symbol;Acc:HGNC:7029]
PTK2	protein tyrosine kinase 2 [Source:HGNC Symbol;Acc:HGNC:9611]
APC	adenomatous polyposis coli [Source:HGNC Symbol;Acc:HGNC:583]
HEY1	hes related family bHLH transcription factor with YRPW motif 1 [Source:HGNC Symbol;Acc:HGNC:4880]
ERBB2	erb-b2 receptor tyrosine kinase 2 [Source:HGNC Symbol;Acc:HGNC:3430]
RECK	reversion inducing cysteine rich protein with kazal motifs [Source:HGNC Symbol;Acc:HGNC:11345]
GSTT1	glutathione S-transferase theta 1 [Source:HGNC Symbol;Acc:HGNC:4641]
EGF	epidermal growth factor [Source:HGNC Symbol;Acc:HGNC:3229]
RPS6KA3	ribosomal protein S6 kinase A3 [Source:HGNC Symbol;Acc:HGNC:10432]
NF1	neurofibromin 1 [Source:HGNC Symbol;Acc:HGNC:7765]
PRKCB	protein kinase C beta [Source:HGNC Symbol;Acc:HGNC:9395]
GABARAPL2	GABA type A receptor associated protein like 2 [Source:HGNC Symbol;Acc:HGNC:13291]
GUCY2F	guanylate cyclase 2F, retinal [Source:HGNC Symbol;Acc:HGNC:4691]
RAC1	ras-related C3 botulinum toxin substrate 1 (rho family, small GTP binding protein Rac1) [Source:HGNC Symbol;Acc:HGNC:9801]
CDC42BPG	CDC42 binding protein kinase gamma [Source:HGNC Symbol;Acc:HGNC:29829]
PRKCA	protein kinase C alpha [Source:HGNC Symbol;Acc:HGNC:9393]
HSPB8	heat shock protein family B (small) member 8 [Source:HGNC Symbol;Acc:HGNC:30171]
CD9	CD9 molecule [Source:HGNC Symbol;Acc:HGNC:1709]
CTSB	cathepsin B [Source:HGNC Symbol;Acc:HGNC:2527]
CSTA	cystatin A [Source:HGNC Symbol;Acc:HGNC:2481]
IDH1	isocitrate dehydrogenase (NADP(+)) 1, cytosolic [Source:HGNC Symbol;Acc:HGNC:5382]
IDH2	isocitrate dehydrogenase (NADP(+)) 2, mitochondrial [Source:HGNC Symbol;Acc:HGNC:5383]
CDK3	cyclin dependent kinase 3 [Source:HGNC Symbol;Acc:HGNC:1772]
CDK2	cyclin dependent kinase 2 [Source:HGNC Symbol;Acc:HGNC:1771]
TES	testin LIM domain protein [Source:HGNC Symbol;Acc:HGNC:14620]
MGMT	O-6-methylguanine-DNA methyltransferase [Source:HGNC Symbol;Acc:HGNC:7059]
MYC	v-myc avian myelocytomatosis viral oncogene homolog [Source:HGNC Symbol;Acc:HGNC:7553]
NOTCH3	notch 3 [Source:HGNC Symbol;Acc:HGNC:7883]
HES1	hes family bHLH transcription factor 1 [Source:HGNC Symbol;Acc:HGNC:5192]
STAG2	stromal antigen 2 [Source:HGNC Symbol;Acc:HGNC:11355]
PIM1	Pim-1 proto-oncogene, serine/threonine kinase [Source:HGNC Symbol;Acc:HGNC:8986]
BRD4	bromodomain containing 4 [Source:HGNC Symbol;Acc:HGNC:13575]
FOSL2	FOS like 2, AP-1 transcription factor subunit [Source:HGNC Symbol;Acc:HGNC:3798]
BRD2	bromodomain containing 2 [Source:HGNC Symbol;Acc:HGNC:1103]
CDK6	cyclin dependent kinase 6 [Source:HGNC Symbol;Acc:HGNC:1777]
H2AFX (H2AX)	H2A histone family member X [Source:HGNC Symbol;Acc:HGNC:4739]
IL1B	interleukin 1 beta [Source:HGNC Symbol;Acc:HGNC:5992]
HIF1A	hypoxia inducible factor 1 alpha subunit [Source:HGNC Symbol;Acc:HGNC:4910]
MAPK8	mitogen-activated protein kinase 8 [Source:HGNC Symbol;Acc:HGNC:6881]
PDK2	pyruvate dehydrogenase kinase 2 [Source:HGNC Symbol;Acc:HGNC:8810]
AKT1	AKT serine/threonine kinase 1 [Source:HGNC Symbol;Acc:HGNC:391]
IRAK1	interleukin 1 receptor associated kinase 1 [Source:HGNC Symbol;Acc:HGNC:6112]
PINK1	PTEN induced putative kinase 1 [Source:HGNC Symbol;Acc:HGNC:14581]
LZTR1	leucine-zipper-like transcription regulator 1 [Source:HGNC Symbol;Acc:HGNC:6742]
RUVBL1	RuvB like AAA ATPase 1 [Source:HGNC Symbol;Acc:HGNC:10474]
PRKD3	protein kinase D3 [Source:HGNC Symbol;Acc:HGNC:9408]
GSK3A	glycogen synthase kinase 3 alpha [Source:HGNC Symbol;Acc:HGNC:4616]
TNFSF10	tumor necrosis factor superfamily member 10 [Source:HGNC Symbol;Acc:HGNC:11925]
CFLAR	CASP8 and FADD like apoptosis regulator [Source:HGNC Symbol;Acc:HGNC:1876]
NLK	nemo like kinase [Source:HGNC Symbol;Acc:HGNC:29858]
SHANK2	SH3 and multiple ankyrin repeat domains 2 [Source:HGNC Symbol;Acc:HGNC:14295]
TAF1L	TATA-box binding protein associated factor 1 like [Source:HGNC Symbol;Acc:HGNC:18056]
TAF9	TATA-box binding protein associated factor 9 [Source:HGNC Symbol;Acc:HGNC:11542]
SIK1	salt inducible kinase 1 [Source:HGNC Symbol;Acc:HGNC:11142]
MAP3K7	mitogen-activated protein kinase kinase kinase 7 [Source:HGNC Symbol;Acc:HGNC:6859]
FAT1	FAT atypical cadherin 1 [Source:HGNC Symbol;Acc:HGNC:3595]
EZH2	enhancer of zeste 2 polycomb repressive complex 2 subunit [Source:HGNC Symbol;Acc:HGNC:3527]
BHLHE40	basic helix-loop-helix family member e40 [Source:HGNC Symbol;Acc:HGNC:1046]
POLK	polymerase (DNA) kappa [Source:HGNC Symbol;Acc:HGNC:9183]
ZBTB7A	zinc finger and BTB domain containing 7A [Source:HGNC Symbol;Acc:HGNC:18078]
NCOR1	nuclear receptor corepressor 1 [Source:HGNC Symbol;Acc:HGNC:7672]
CTSK	cathepsin K [Source:HGNC Symbol;Acc:HGNC:2536]
ARID4B	AT-rich interaction domain 4B [Source:HGNC Symbol;Acc:HGNC:15550]
GSK3B	glycogen synthase kinase 3 beta [Source:HGNC Symbol;Acc:HGNC:4617]
STYK1	serine/threonine/tyrosine kinase 1 [Source:HGNC Symbol;Acc:HGNC:18889]
AKT3	AKT serine/threonine kinase 3 [Source:HGNC Symbol;Acc:HGNC:393]
CTNNB1	catenin beta 1 [Source:HGNC Symbol;Acc:HGNC:2514]
CTNND2	catenin delta 2 [Source:HGNC Symbol;Acc:HGNC:2516]
RUNX1	runt related transcription factor 1 [Source:HGNC Symbol;Acc:HGNC:10471]
IL2	interleukin 2 [Source:HGNC Symbol;Acc:HGNC:6001]
PSMC3	proteasome 26S subunit, ATPase 3 [Source:HGNC Symbol;Acc:HGNC:9549]
STKLD1	serine/threonine kinase-like domain containing 1 [Source:HGNC Symbol;Acc:HGNC:28669]
HSPA8	heat shock protein family A (Hsp70) member 8 [Source:HGNC Symbol;Acc:HGNC:5241]
CHI3L1	chitinase 3 like 1 [Source:HGNC Symbol;Acc:HGNC:1932]
MAPK3	mitogen-activated protein kinase 3 [Source:HGNC Symbol;Acc:HGNC:6877]
DUSP6	dual specificity phosphatase 6 [Source:HGNC Symbol;Acc:HGNC:3072]
PML	promyelocytic leukemia [Source:HGNC Symbol;Acc:HGNC:9113]
TERT	telomerase reverse transcriptase [Source:HGNC Symbol;Acc:HGNC:11730]
DYRK2	dual specificity tyrosine phosphorylation regulated kinase 2 [Source:HGNC Symbol;Acc:HGNC:3093]
DAXX	death-domain associated protein [Source:HGNC Symbol;Acc:HGNC:2681]
MDM4	MDM4, p53 regulator [Source:HGNC Symbol;Acc:HGNC:6974]
MKLN1	muskelin 1 [Source:HGNC Symbol;Acc:HGNC:7109]
GDNF	glial cell derived neurotrophic factor [Source:HGNC Symbol;Acc:HGNC:4232]
HSP90AA1	heat shock protein 90kDa alpha family class A member 1 [Source:HGNC Symbol;Acc:HGNC:5253]
INSRR	insulin receptor related receptor [Source:HGNC Symbol;Acc:HGNC:6093]
SMAD2	SMAD family member 2 [Source:HGNC Symbol;Acc:HGNC:6768]
EPHB6	EPH receptor B6 [Source:HGNC Symbol;Acc:HGNC:3396]
MMP2	matrix metallopeptidase 2 [Source:HGNC Symbol;Acc:HGNC:7166]
MMP9	matrix metallopeptidase 9 [Source:HGNC Symbol;Acc:HGNC:7176]
CXCL8	C-X-C motif chemokine ligand 8 [Source:HGNC Symbol;Acc:HGNC:6025]
FN1	fibronectin 1 [Source:HGNC Symbol;Acc:HGNC:3778]
TGM2	transglutaminase 2 [Source:HGNC Symbol;Acc:HGNC:11778]
TRIB3	tribbles pseudokinase 3 [Source:HGNC Symbol;Acc:HGNC:16228]
LTBP4	latent transforming growth factor beta binding protein 4 [Source:HGNC Symbol;Acc:HGNC:6717]
DIAPH3	diaphanous related formin 3 [Source:HGNC Symbol;Acc:HGNC:15480]
BCHE	butyrylcholinesterase [Source:HGNC Symbol;Acc:HGNC:983]
SUZ12	SUZ12 polycomb repressive complex 2 subunit [Source:HGNC Symbol;Acc:HGNC:17101]
MTOR	mechanistic target of rapamycin [Source:HGNC Symbol;Acc:HGNC:3942]
PTEN	phosphatase and tensin homolog [Source:HGNC Symbol;Acc:HGNC:9588]
NDRG1	N-myc downstream regulated 1 [Source:HGNC Symbol;Acc:HGNC:7679]
WT1	Wilms tumor 1 [Source:HGNC Symbol;Acc:HGNC:12796]
CSTB	cystatin B [Source:HGNC Symbol;Acc:HGNC:2482]
TRIM33	tripartite motif containing 33 [Source:HGNC Symbol;Acc:HGNC:16290]
SRPK2	SRSF protein kinase 2 [Source:HGNC Symbol;Acc:HGNC:11306]
BMI1	BMI1 proto-oncogene, polycomb ring finger [Source:HGNC Symbol;Acc:HGNC:1066]
ATRX	ATRX, chromatin remodeler [Source:HGNC Symbol;Acc:HGNC:886]
ERN1	endoplasmic reticulum to nucleus signaling 1 [Source:HGNC Symbol;Acc:HGNC:3449]
MAPKAPK3	mitogen-activated protein kinase-activated protein kinase 3 [Source:HGNC Symbol;Acc:HGNC:6888]
CDC42EP4	CDC42 effector protein 4 [Source:HGNC Symbol;Acc:HGNC:17147]
MCM3	minichromosome maintenance complex component 3 [Source:HGNC Symbol;Acc:HGNC:6945]
MCM4	minichromosome maintenance complex component 4 [Source:HGNC Symbol;Acc:HGNC:6947]
MCM5	minichromosome maintenance complex component 5 [Source:HGNC Symbol;Acc:HGNC:6948]
SMARCA2	SWI/SNF related, matrix associated, actin dependent regulator of chromatin, subfamily a, member 2 [Source:HGNC Symbol;Acc:HGNC:11098]
MCM6	minichromosome maintenance complex component 6 [Source:HGNC Symbol;Acc:HGNC:6949]
SMARCA4	SWI/SNF related, matrix associated, actin dependent regulator of chromatin, subfamily a, member 4 [Source:HGNC Symbol;Acc:HGNC:11100]
KMT2A	lysine methyltransferase 2A [Source:HGNC Symbol;Acc:HGNC:7132]
MCM7	minichromosome maintenance complex component 7 [Source:HGNC Symbol;Acc:HGNC:6950]
CBX4	chromobox 4 [Source:HGNC Symbol;Acc:HGNC:1554]
SMARCC1	SWI/SNF related, matrix associated, actin dependent regulator of chromatin subfamily c member 1 [Source:HGNC Symbol;Acc:HGNC:11104]
MCM2	minichromosome maintenance complex component 2 [Source:HGNC Symbol;Acc:HGNC:6944]
XRCC6	X-ray repair cross complementing 6 [Source:HGNC Symbol;Acc:HGNC:4055]
CCND1	cyclin D1 [Source:HGNC Symbol;Acc:HGNC:1582]
ATAD2	ATPase family, AAA domain containing 2 [Source:HGNC Symbol;Acc:HGNC:30123]
PRMT5	protein arginine methyltransferase 5 [Source:HGNC Symbol;Acc:HGNC:10894]
RBBP7	RB binding protein 7, chromatin remodeling factor [Source:HGNC Symbol;Acc:HGNC:9890]
RBL1	RB transcriptional corepressor like 1 [Source:HGNC Symbol;Acc:HGNC:9893]
FOXO3	forkhead box O3 [Source:HGNC Symbol;Acc:HGNC:3821]
MMS22L	MMS22 like, DNA repair protein [Source:HGNC Symbol;Acc:HGNC:21475]
CHD3	chromodomain helicase DNA binding protein 3 [Source:HGNC Symbol;Acc:HGNC:1918]
AR	androgen receptor [Source:HGNC Symbol;Acc:HGNC:644]
SETDB1	SET domain bifurcated 1 [Source:HGNC Symbol;Acc:HGNC:10761]
SUPT16H	SPT16 homolog, facilitates chromatin remodeling subunit [Source:HGNC Symbol;Acc:HGNC:11465]
UBE2I	ubiquitin conjugating enzyme E2 I [Source:HGNC Symbol;Acc:HGNC:12485]
CHD4	chromodomain helicase DNA binding protein 4 [Source:HGNC Symbol;Acc:HGNC:1919]
WHSC1 (NSD2)	Wolf-Hirschhorn syndrome candidate 1 [Source:HGNC Symbol;Acc:HGNC:12766]
UHRF1	ubiquitin like with PHD and ring finger domains 1 [Source:HGNC Symbol;Acc:HGNC:12556]
KDM1A	lysine demethylase 1A [Source:HGNC Symbol;Acc:HGNC:29079]
MDM2	MDM2 proto-oncogene [Source:HGNC Symbol;Acc:HGNC:6973]
PRMT7	protein arginine methyltransferase 7 [Source:HGNC Symbol;Acc:HGNC:25557]
GATAD2A	GATA zinc finger domain containing 2A [Source:HGNC Symbol;Acc:HGNC:29989]
NPM1	nucleophosmin (nucleolar phosphoprotein B23, numatrin) [Source:HGNC Symbol;Acc:HGNC:7910]
RELA	RELA proto-oncogene, NF-kB subunit [Source:HGNC Symbol;Acc:HGNC:9955]
PARP1	poly(ADP-ribose) polymerase 1 [Source:HGNC Symbol;Acc:HGNC:270]
KAT5	lysine acetyltransferase 5 [Source:HGNC Symbol;Acc:HGNC:5275]
COPRS	coordinator of PRMT5 and differentiation stimulator [Source:HGNC Symbol;Acc:HGNC:28848]
BAZ1A	bromodomain adjacent to zinc finger domain 1A [Source:HGNC Symbol;Acc:HGNC:960]
ORC2	origin recognition complex subunit 2 [Source:HGNC Symbol;Acc:HGNC:8488]
HSPA4	heat shock protein family A (Hsp70) member 4 [Source:HGNC Symbol;Acc:HGNC:5237]
CUL4A	cullin 4A [Source:HGNC Symbol;Acc:HGNC:2554]
PELP1	proline, glutamate and leucine rich protein 1 [Source:HGNC Symbol;Acc:HGNC:30134]
CHAF1B	chromatin assembly factor 1 subunit B [Source:HGNC Symbol;Acc:HGNC:1911]
KAT7	lysine acetyltransferase 7 [Source:HGNC Symbol;Acc:HGNC:17016]
DEK	DEK proto-oncogene [Source:HGNC Symbol;Acc:HGNC:2768]
RNF2	ring finger protein 2 [Source:HGNC Symbol;Acc:HGNC:10061]
SMARCA5	SWI/SNF related, matrix associated, actin dependent regulator of chromatin, subfamily a, member 5 [Source:HGNC Symbol;Acc:HGNC:11101]
PHF8	PHD finger protein 8 [Source:HGNC Symbol;Acc:HGNC:20672]
BRD7	bromodomain containing 7 [Source:HGNC Symbol;Acc:HGNC:14310]
SUV39H1	suppressor of variegation 3-9 homolog 1 [Source:HGNC Symbol;Acc:HGNC:11479]
HSP90AB1	heat shock protein 90kDa alpha family class B member 1 [Source:HGNC Symbol;Acc:HGNC:5258]
HOXA9	homeobox A9 [Source:HGNC Symbol;Acc:HGNC:5109]
CHUK	conserved helix-loop-helix ubiquitous kinase [Source:HGNC Symbol;Acc:HGNC:1974]
CBX7	chromobox 7 [Source:HGNC Symbol;Acc:HGNC:1557]
CREBBP	CREB binding protein [Source:HGNC Symbol;Acc:HGNC:2348]
MYOD1	myogenic differentiation 1 [Source:HGNC Symbol;Acc:HGNC:7611]
HPF1	histone PARylation factor 1 [Source:HGNC Symbol;Acc:HGNC:26051]
SIRT2	sirtuin 2 [Source:HGNC Symbol;Acc:HGNC:10886]
CBX6	chromobox 6 [Source:HGNC Symbol;Acc:HGNC:1556]
CBX5	chromobox 5 [Source:HGNC Symbol;Acc:HGNC:1555]
KDM4A	lysine demethylase 4A [Source:HGNC Symbol;Acc:HGNC:22978]
KAT14	lysine acetyltransferase 14 [Source:HGNC Symbol;Acc:HGNC:15904]
SFMBT1	Scm-like with four mbt domains 1 [Source:HGNC Symbol;Acc:HGNC:20255]
KAT8	lysine acetyltransferase 8 [Source:HGNC Symbol;Acc:HGNC:17933]
TRIM28	tripartite motif containing 28 [Source:HGNC Symbol;Acc:HGNC:16384]
PHF20L1	PHD finger protein 20-like 1 [Source:HGNC Symbol;Acc:HGNC:24280]
RACK1	receptor for activated C kinase 1 [Source:HGNC Symbol;Acc:HGNC:4399]
CHAF1A	chromatin assembly factor 1 subunit A [Source:HGNC Symbol;Acc:HGNC:1910]
CBX1	chromobox 1 [Source:HGNC Symbol;Acc:HGNC:1551]
TOP2A	topoisomerase (DNA) II alpha [Source:HGNC Symbol;Acc:HGNC:11989]
RAD51B	RAD51 paralog B [Source:HGNC Symbol;Acc:HGNC:9822]
TP53BP1	tumor protein p53 binding protein 1 [Source:HGNC Symbol;Acc:HGNC:11999]
TP53	tumor protein p53 [Source:HGNC Symbol;Acc:HGNC:11998]
ANP32A	acidic nuclear phosphoprotein 32 family member A [Source:HGNC Symbol;Acc:HGNC:13233]
PHF20	PHD finger protein 20 [Source:HGNC Symbol;Acc:HGNC:16098]
GATAD2B	GATA zinc finger domain containing 2B [Source:HGNC Symbol;Acc:HGNC:30778]
CDK1	cyclin dependent kinase 1 [Source:HGNC Symbol;Acc:HGNC:1722]
CBX8	chromobox 8 [Source:HGNC Symbol;Acc:HGNC:15962]
TONSL	tonsoku-like, DNA repair protein [Source:HGNC Symbol;Acc:HGNC:7801]
NASP	nuclear autoantigenic sperm protein [Source:HGNC Symbol;Acc:HGNC:7644]
TAF1	TATA-box binding protein associated factor 1 [Source:HGNC Symbol;Acc:HGNC:11535]
EP300	E1A binding protein p300 [Source:HGNC Symbol;Acc:HGNC:3373]
TP73	tumor protein p73 [Source:HGNC Symbol;Acc:HGNC:12003]
NOC2L	NOC2 like nucleolar associated transcriptional repressor [Source:HGNC Symbol;Acc:HGNC:24517]
CENPA	centromere protein A [Source:HGNC Symbol;Acc:HGNC:1851]
RAG1	recombination activating gene 1 [Source:HGNC Symbol;Acc:HGNC:9831]
EHMT1	euchromatic histone lysine methyltransferase 1 [Source:HGNC Symbol;Acc:HGNC:24650]
HDAC6	histone deacetylase 6 [Source:HGNC Symbol;Acc:HGNC:14064]
MECP2	methyl-CpG binding protein 2 [Source:HGNC Symbol;Acc:HGNC:6990]
MTA2	metastasis associated 1 family member 2 [Source:HGNC Symbol;Acc:HGNC:7411]
ASF1B	anti-silencing function 1B histone chaperone [Source:HGNC Symbol;Acc:HGNC:20996]
DYRK1A	dual specificity tyrosine phosphorylation regulated kinase 1A [Source:HGNC Symbol;Acc:HGNC:3091]
HDAC5	histone deacetylase 5 [Source:HGNC Symbol;Acc:HGNC:14068]
SSRP1	structure specific recognition protein 1 [Source:HGNC Symbol;Acc:HGNC:11327]
TRIM24	tripartite motif containing 24 [Source:HGNC Symbol;Acc:HGNC:11812]
MTA1	metastasis associated 1 [Source:HGNC Symbol;Acc:HGNC:7410]
MEN1	menin 1 [Source:HGNC Symbol;Acc:HGNC:7010]
NSD1	nuclear receptor binding SET domain protein 1 [Source:HGNC Symbol;Acc:HGNC:14234]
TAF15	TATA-box binding protein associated factor 15 [Source:HGNC Symbol;Acc:HGNC:11547]
TWIST1	twist family bHLH transcription factor 1 [Source:HGNC Symbol;Acc:HGNC:12428]
UHRF2	ubiquitin like with PHD and ring finger domains 2 [Source:HGNC Symbol;Acc:HGNC:12557]
HIRA	histone cell cycle regulator [Source:HGNC Symbol;Acc:HGNC:4916]
MSL3	male-specific lethal 3 homolog (Drosophila) [Source:HGNC Symbol;Acc:HGNC:7370]
L3MBTL2	L3MBTL2 polycomb repressive complex 1 subunit [Source:HGNC Symbol;Acc:HGNC:18594]
BRPF1	bromodomain and PHD finger containing 1 [Source:HGNC Symbol;Acc:HGNC:14255]
STAT3	signal transducer and activator of transcription 3 [Source:HGNC Symbol;Acc:HGNC:11364]
FANCD2	Fanconi anemia complementation group D2 [Source:HGNC Symbol;Acc:HGNC:3585]
ASF1A	anti-silencing function 1A histone chaperone [Source:HGNC Symbol;Acc:HGNC:20995]
CCNA2	cyclin A2 [Source:HGNC Symbol;Acc:HGNC:1578]
SHPRH	SNF2 histone linker PHD RING helicase [Source:HGNC Symbol;Acc:HGNC:19336]
IPO4	importin 4 [Source:HGNC Symbol;Acc:HGNC:19426]
CCNE1	cyclin E1 [Source:HGNC Symbol;Acc:HGNC:1589]
L3MBTL1	l(3)mbt-like 1 (Drosophila) [Source:HGNC Symbol;Acc:HGNC:15905]
HDAC8	histone deacetylase 8 [Source:HGNC Symbol;Acc:HGNC:13315]
PKM	pyruvate kinase, muscle [Source:HGNC Symbol;Acc:HGNC:9021]
LBR	lamin B receptor [Source:HGNC Symbol;Acc:HGNC:6518]
TAF1B	TATA-box binding protein associated factor, RNA polymerase I subunit B [Source:HGNC Symbol;Acc:HGNC:11533]
TAF1A	TATA-box binding protein associated factor, RNA polymerase I subunit A [Source:HGNC Symbol;Acc:HGNC:11532]
LMNA	lamin A/C [Source:HGNC Symbol;Acc:HGNC:6636]
KAT6A	lysine acetyltransferase 6A [Source:HGNC Symbol;Acc:HGNC:13013]
HDAC3	histone deacetylase 3 [Source:HGNC Symbol;Acc:HGNC:4854]
PBRM1	polybromo 1 [Source:HGNC Symbol;Acc:HGNC:30064]
PRMT1	protein arginine methyltransferase 1 [Source:HGNC Symbol;Acc:HGNC:5187]
BPTF	bromodomain PHD finger transcription factor [Source:HGNC Symbol;Acc:HGNC:3581]
EHMT2	euchromatic histone lysine methyltransferase 2 [Source:HGNC Symbol;Acc:HGNC:14129]
RPS6KA5	ribosomal protein S6 kinase A5 [Source:HGNC Symbol;Acc:HGNC:10434]
CBX2	chromobox 2 [Source:HGNC Symbol;Acc:HGNC:1552]
SET	SET nuclear proto-oncogene [Source:HGNC Symbol;Acc:HGNC:10760]
CBX3	chromobox 3 [Source:HGNC Symbol;Acc:HGNC:1553]
XPC	XPC complex subunit, DNA damage recognition and repair factor [Source:HGNC Symbol;Acc:HGNC:12816]
KAT2B	lysine acetyltransferase 2B [Source:HGNC Symbol;Acc:HGNC:8638]
XRCC5	X-ray repair cross complementing 5 [Source:HGNC Symbol;Acc:HGNC:12833]
ERCC6	ERCC excision repair 6, chromatin remodeling factor [Source:HGNC Symbol;Acc:HGNC:3438]
BRCA1	BRCA1, DNA repair associated [Source:HGNC Symbol;Acc:HGNC:1100]
KMT5A	lysine methyltransferase 5A [Source:HGNC Symbol;Acc:HGNC:29489]
EED	embryonic ectoderm development [Source:HGNC Symbol;Acc:HGNC:3188]
PRKDC	protein kinase, DNA-activated, catalytic polypeptide [Source:HGNC Symbol;Acc:HGNC:9413]
PCNA	proliferating cell nuclear antigen [Source:HGNC Symbol;Acc:HGNC:8729]
YWHAZ	tyrosine 3-monooxygenase/tryptophan 5-monooxygenase activation protein zeta [Source:HGNC Symbol;Acc:HGNC:12855]
SIRT1	sirtuin 1 [Source:HGNC Symbol;Acc:HGNC:14929]
DNMT3A	DNA (cytosine-5-)-methyltransferase 3 alpha [Source:HGNC Symbol;Acc:HGNC:2978]
DNMT1	DNA (cytosine-5-)-methyltransferase 1 [Source:HGNC Symbol;Acc:HGNC:2976]
PARP10	poly(ADP-ribose) polymerase family member 10 [Source:HGNC Symbol;Acc:HGNC:25895]
JUN	Jun proto-oncogene, AP-1 transcription factor subunit [Source:HGNC Symbol;Acc:HGNC:6204]
HDGF	hepatoma-derived growth factor [Source:HGNC Symbol;Acc:HGNC:4856]
ESR1	estrogen receptor 1 [Source:HGNC Symbol;Acc:HGNC:3467]
HDAC2	histone deacetylase 2 [Source:HGNC Symbol;Acc:HGNC:4853]
EID1	EP300 interacting inhibitor of differentiation 1 [Source:HGNC Symbol;Acc:HGNC:1191]
HDAC1	histone deacetylase 1 [Source:HGNC Symbol;Acc:HGNC:4852]
KMT5C	lysine methyltransferase 5C [Source:HGNC Symbol;Acc:HGNC:28405]
KAT2A	lysine acetyltransferase 2A [Source:HGNC Symbol;Acc:HGNC:4201]
WDR5	WD repeat domain 5 [Source:HGNC Symbol;Acc:HGNC:12757]
COMMD3-BMI1	COMMD3-BMI1 readthrough [Source:HGNC Symbol;Acc:HGNC:48326]
HAT1	histone acetyltransferase 1 [Source:HGNC Symbol;Acc:HGNC:4821]
ARID4A	AT-rich interaction domain 4A [Source:HGNC Symbol;Acc:HGNC:9885]
RBBP4	RB binding protein 4, chromatin remodeling factor [Source:HGNC Symbol;Acc:HGNC:9887]
ING2	inhibitor of growth family member 2 [Source:HGNC Symbol;Acc:HGNC:6063]
SETD7	SET domain containing lysine methyltransferase 7 [Source:HGNC Symbol;Acc:HGNC:30412]
WHSC1L1 (NSD3)	Wolf-Hirschhorn syndrome candidate 1-like 1 [Source:HGNC Symbol;Acc:HGNC:12767]
RB1	RB transcriptional corepressor 1 [Source:HGNC Symbol;Acc:HGNC:9884]
UBC	ubiquitin C [Source:HGNC Symbol;Acc:HGNC:12468]
APP	amyloid beta precursor protein [Source:HGNC Symbol;Acc:HGNC:620]
KCNIP4	potassium voltage-gated channel interacting protein 4 [Source:HGNC Symbol;Acc:HGNC:30083]
AUTS2	autism susceptibility candidate 2 [Source:HGNC Symbol;Acc:HGNC:14262]
CAST	calpastatin [Source:HGNC Symbol;Acc:HGNC:1515]
NTRK2	neurotrophic receptor tyrosine kinase 2 [Source:HGNC Symbol;Acc:HGNC:8032]
CELF2	CUGBP, Elav-like family member 2 [Source:HGNC Symbol;Acc:HGNC:2550]
CDH13	cadherin 13 [Source:HGNC Symbol;Acc:HGNC:1753]
DAB1	DAB1, reelin adaptor protein [Source:HGNC Symbol;Acc:HGNC:2661]
RBFOX1	RNA binding protein, fox-1 homolog 1 [Source:HGNC Symbol;Acc:HGNC:18222]
RDX	radixin [Source:HGNC Symbol;Acc:HGNC:9944]
NFIA	nuclear factor I A [Source:HGNC Symbol;Acc:HGNC:7784]
FOXP1	forkhead box P1 [Source:HGNC Symbol;Acc:HGNC:3823]
MUC1	mucin 1, cell surface associated [Source:HGNC Symbol;Acc:HGNC:7508]
TCF4	transcription factor 4 [Source:HGNC Symbol;Acc:HGNC:11634]
NFIB	nuclear factor I B [Source:HGNC Symbol;Acc:HGNC:7785]
PPP3CA	protein phosphatase 3 catalytic subunit alpha [Source:HGNC Symbol;Acc:HGNC:9314]
DAPK1	death associated protein kinase 1 [Source:HGNC Symbol;Acc:HGNC:2674]
SMIM10L2A	small integral membrane protein 10 like 2A [Source:HGNC Symbol;Acc:HGNC:34499]
ZFP57	ZFP57 zinc finger protein [Source:HGNC Symbol;Acc:HGNC:18791]
UGT2B17	UDP glucuronosyltransferase family 2 member B17 [Source:HGNC Symbol;Acc:HGNC:12547]
TDRP	testis development related protein [Source:HGNC Symbol;Acc:HGNC:26951]
IL31	interleukin 31 [Source:HGNC Symbol;Acc:HGNC:19372]
UGT8	UDP glycosyltransferase 8 [Source:HGNC Symbol;Acc:HGNC:12555]
MRPL23	mitochondrial ribosomal protein L23 [Source:HGNC Symbol;Acc:HGNC:10322]
COX6B2	cytochrome c oxidase subunit 6B2 [Source:HGNC Symbol;Acc:HGNC:24380]
XRRA1	X-ray radiation resistance associated 1 [Source:HGNC Symbol;Acc:HGNC:18868]
UGT2B15	UDP glucuronosyltransferase family 2 member B15 [Source:HGNC Symbol;Acc:HGNC:12546]
RPL41	ribosomal protein L41 [Source:HGNC Symbol;Acc:HGNC:10354]
CMTM1	CKLF like MARVEL transmembrane domain containing 1 [Source:HGNC Symbol;Acc:HGNC:19172]
KCNK18	potassium two pore domain channel subfamily K member 18 [Source:HGNC Symbol;Acc:HGNC:19439]
UGT1A8	UDP glucuronosyltransferase family 1 member A8 [Source:HGNC Symbol;Acc:HGNC:12540]
UBAP1L	ubiquitin associated protein 1 like [Source:HGNC Symbol;Acc:HGNC:40028]
PLK5	polo like kinase 5 [Source:HGNC Symbol;Acc:HGNC:27001]
DNAH1	dynein axonemal heavy chain 1 [Source:HGNC Symbol;Acc:HGNC:2940]
UGT1A10	UDP glucuronosyltransferase family 1 member A10 [Source:HGNC Symbol;Acc:HGNC:12531]
SPSB4	splA/ryanodine receptor domain and SOCS box containing 4 [Source:HGNC Symbol;Acc:HGNC:30630]
IL27	interleukin 27 [Source:HGNC Symbol;Acc:HGNC:19157]
LUZP6	leucine zipper protein 6 [Source:HGNC Symbol;Acc:HGNC:33955]
PLXDC2	plexin domain containing 2 [Source:HGNC Symbol;Acc:HGNC:21013]
IQGAP2	IQ motif containing GTPase activating protein 2 [Source:HGNC Symbol;Acc:HGNC:6111]
XPO1	exportin 1 [Source:HGNC Symbol;Acc:HGNC:12825]
SETBP1	SET binding protein 1 [Source:HGNC Symbol;Acc:HGNC:15573]
TMSB4X	thymosin beta 4, X-linked [Source:HGNC Symbol;Acc:HGNC:11881]
UBB	ubiquitin B [Source:HGNC Symbol;Acc:HGNC:12463]
BMP4	bone morphogenetic protein 4 [Source:HGNC Symbol;Acc:HGNC:1071]
ENO2	enolase 2 [Source:HGNC Symbol;Acc:HGNC:3353]
FMOD	fibromodulin [Source:HGNC Symbol;Acc:HGNC:3774]
RPE	ribulose-5-phosphate-3-epimerase [Source:HGNC Symbol;Acc:HGNC:10293]
CDH3	cadherin 3 [Source:HGNC Symbol;Acc:HGNC:1762]
PLA2G2D	phospholipase A2 group IID [Source:HGNC Symbol;Acc:HGNC:9033]
UVRAG	UV radiation resistance associated [Source:HGNC Symbol;Acc:HGNC:12640]
DRD5	dopamine receptor D5 [Source:HGNC Symbol;Acc:HGNC:3026]
CLIC1	chloride intracellular channel 1 [Source:HGNC Symbol;Acc:HGNC:2062]
DEFA5	defensin alpha 5 [Source:HGNC Symbol;Acc:HGNC:2764]
UQCRH	ubiquinol-cytochrome c reductase hinge protein [Source:HGNC Symbol;Acc:HGNC:12590]
TUBA1A	tubulin alpha 1a [Source:HGNC Symbol;Acc:HGNC:20766]
TCF7L1	transcription factor 7 like 1 [Source:HGNC Symbol;Acc:HGNC:11640]
ADCY6	adenylate cyclase 6 [Source:HGNC Symbol;Acc:HGNC:237]
CLDN10	claudin 10 [Source:HGNC Symbol;Acc:HGNC:2033]
PLD2	phospholipase D2 [Source:HGNC Symbol;Acc:HGNC:9068]
YWHAE	tyrosine 3-monooxygenase/tryptophan 5-monooxygenase activation protein epsilon [Source:HGNC Symbol;Acc:HGNC:12851]
NFKB1	nuclear factor kappa B subunit 1 [Source:HGNC Symbol;Acc:HGNC:7794]
PPARG	peroxisome proliferator activated receptor gamma [Source:HGNC Symbol;Acc:HGNC:9236]
PRKCQ	protein kinase C theta [Source:HGNC Symbol;Acc:HGNC:9410]
PRL	prolactin [Source:HGNC Symbol;Acc:HGNC:9445]
CDKN1A	cyclin dependent kinase inhibitor 1A [Source:HGNC Symbol;Acc:HGNC:1784]
ITPKC	inositol-trisphosphate 3-kinase C [Source:HGNC Symbol;Acc:HGNC:14897]
EDAR	ectodysplasin A receptor [Source:HGNC Symbol;Acc:HGNC:2895]
ATP12A	ATPase H+/K+ transporting non-gastric alpha2 subunit [Source:HGNC Symbol;Acc:HGNC:13816]
